# Supplementary material for: Functional divergence of a global regulatory complex governing fungal filamentation
Source: PLoS Genet. 2019 Jan 7;15(1):e1007901. doi: 10.1371/journal.pgen.1007901 (PMC6336345; doi:10.1371/journal.pgen.1007901)
Supplement: S2 Table — List of targets whose expression is altered in the mfg1Δ/mfg1Δ, flo8Δ/flo8Δ, or mfg1Δ/mfg1Δ flo8Δ/flo8Δ double mutant, under basal conditions (30°C) or filament-inducing conditions (10% serum for one hour or 3 hours, 37°C). (XLSX) [file pgen.1007901.s013.xlsx]

## Sheet: flo8 _30C
Experiment	flo8 mutant yeast 30C
Time	0h
Systematic	Normalized	t-test P-value	Common	Synonyms	Description
orf19.3897	5.02606	0.0287637		orf19.11378|IPF23260.1|IPF19897.1|Contig4-2263_0011|orf6.2342|CA1050|CaO19.11378|CaO19.3897|IPF19897	Predicted ORF in Assemblies 19, 20 and 21; decreased transcription is observed upon fluphenazine treatment or in an azole-resistant strain that overexpresses CDR1 and CDR2; transcription is repressed in response to alpha pheromone in SpiderM medium
orf19.2475	3.84605	0.0210095	PGA26	orf19.10012|orf6.4960|IPF24884.1|IPF7204.2|Contig4-2954_0019|CA2885|CaO19.10012|CaO19.2475|IPF7204	Putative GPI-anchored protein of unknown function; transcriptionally regulated by iron; expression greater in high iron; induced during cell wall regeneration; possibly spurious ORF (Annotation Working Group prediction)
orf19.5305	2.92219	0.00331678	RHD3	orf19.12765|orf6.8294|PGA29|IPF21875.1|IPF8527.1|Contig4-2961_0009|CA5476|LDG7|CaO19.12765|CaO19.5305|IPF8527	Putative GPI-anchored protein that localizes to the cell wall; transcription is decreased upon yeast-hyphal switch; transcriptionally regulated by iron; expression greater in high iron; clade-associated gene expression
orf19.3829	2.84685	0.00996025	PHR1	orf19.11310|orf6.7524|IPF23455.1|IPF15932.2|Contig4-2187_0001|Contig4-3060_0001|CA4857|CaO19.3829|CaO19.11310	Glycosidase of cell surface; may act on cell-wall beta-1,3-glucan prior to beta-1,6-glucan linkage; E169 and E270 at active site; role in systemic but not vaginal virulence (neutral, not low pH); high pH or filamentation induced
orf19.6656	2.47766	0.0303758	DUR3	IPF2277.1|Contig4-3038_0003|orf6.6765|CA4263|CaO19.6656|IPF2277	Putative protein of unknown function, transcription is upregulated in clinical isolates from HIV+ patients with oral candidiasis; alkaline downregulated; amphotericin B induced; shows colony morphology-related gene regulation by Ssn6p
orf19.5797	2.46252	0.0292944	PI-PLC	orf19.13219|IPF21406.1|IPF17332.2|PLC2|Contig4-3045_0004|orf6.6631|CA4152|CA6227|PLC2.5f|CaO19.5797|PLC21|CaO19.13219|PLC2.3f	Phosphatidylinositol (PtdIns)-specific phospholipase C (PI-PLC); predicted type 2 membrane protein; role in, and regulated by, filamentation, Nrg1p and Tup1p; no mouse systemic virulence role; orf19.5797 and orf19.1586 are almost identical
orf19.4342	2.25106	0.0328517		orf19.11817|IPF11357.2|IPF14623.2|Contig4-2344_0008|orf6.1848|orf6.2799|CA1344|CaO19.4342|IPF14623	Predicted ORF in Assemblies 19, 20 and 21
orf19.6741	2.17918	0.0361838		orf19.14033|IPF20373.1|IPF3506.2|Contig4-3006_0020|orf6.8890|CA5953|CaO19.6741|CaO19.14033|IPF3506	Predicted ORF in Assemblies 19, 20 and 21; regulated by Nrg1p, Tup1p
orf19.7314	2.11992	0.012626	CDG1	IPF5972.1|Contig4-2983_0023|orf6.8395|CA5551|CaO19.7314|IPF5972	Protein described as similar to cysteine dioxygenases; expression is regulated upon white-opaque switching; transcription is upregulated in both intermediate and mature biofilms
orf19.3733	2.10695	0.0270504	IDP2	orf19.11218|IPF9177.2|Contig4-3070_0023|orf6.1691|orf6.5462|CA0643|CaO19.3733	Putative isocitrate dehydrogenase; expression is regulated upon white-opaque switching; shows colony morphology-related gene regulation by Ssn6p; protein detected by mass spec in exponential and stationary phase cultures
orf19.2496	2.08839	0.0475114		orf19.10032|FUN34|IPF24862.1|IPF4026.2|IPF18376.1|Contig4-2897_0002|orf6.6177|CA3813|CA3154|orf19.6169.2|AFF3|CaO19.2496|CaO19.10032|FRP1	Predicted ORF in Assemblies 19, 20 and 21; fluconazole-downregulated
orf19.3974	1.89309	0.0207052	PUT2	orf19.11457|IPF23228.1|IPF13622.2|Contig4-3081_0050|orf6.5650|CA3399|CaO19.11457|CaO19.3974	Alkaline upregulated; protein detected by mass spec in exponential and stationary phase cultures
orf19.5924	1.86218	0.0187739		orf19.13345|IPF21328.1|IPF143.2|Contig4-2867_0017|orf6.9113|CA6126|CaO19.5924|CaO19.13345|IPF143	Predicted zinc-finger protein of unknown function
orf19.6705	1.74168	0.0488176		orf19.13997|IPF20496.1|IPF6654.2|Contig4-2413_0004|orf6.6814|YBL60|CA4305|CaJ7.0399|CaO19.13997|CaO19_6705|CaJ7_0399|CaO19.6705|IPF6654	Putative guanyl nucleotide exchange factor with Sec7 domain; transcriptionally regulated upon yeast-hyphal switch; filament induced; regulated by Nrg1p, Tup1p; shows Mob2p-dependent hyphal regulation
orf19.254	1.73054	0.0043637		orf19.7886|IPF18861.2|IPF16370.2|Contig4-2723_0001|orf6.1987|orf6.691|CA0152|CaO19.254|IPF16368.3f	Predicted ORF in Assemblies 19, 20 and 21; Hog1p-downregulated
orf19.6322	1.72906	0.036345	ARD	ARDH|ARD8|IPF14294.1|Contig4-2795_0014|orf6.5515|CA3288|ARD1|CaO19.6322	D-arabitol dehydrogenase, NAD-dependent (ArDH); enzyme of D-arabitol and D-arabinose catabolism; D-arabitol is a marker for active infection in humans; has conserved YXXXK motif of short-chain alcohol-polyol-sugar dehydrogenases
orf19.3754	1.7229	0.0110881	PHO111	orf19.11238|orf6.4212|IPF23531.1|IPF28658.1|PHO11|Contig4-2761_0007|CaO19.3754|CaO19.11238	Protein described as a constitutive acid phosphatase; transcription is negatively regulated by Rim101p; DTT-extractable; N-glycosylated; merged with orf19.2619 in Assembly 20
orf19.4593	1.69791	0.026617	RGA2	orf19.12062|IPF22680.1|IPF1000.1|Contig4-3104_0056|orf6.7892|CA5154|CaO19.4593|CaO19.12062	Putative GTPase-activating protein (GAP) for Rho-type GTPase Cdc42p; involved in cell signaling pathways that control cell polarity; similar to S. cerevisiae Rga2p; induced upon low-level peroxide stress
orf19.7398	1.67729	0.0416125		IPF3309.1|orf6.8558|CA5696|IPF3309.3eoc	Predicted ORF in Assemblies 19, 20 and 21; decreased expression in response to prostaglandins
orf19.6578	1.63909	0.0040246		orf19.13931|IPF20585.1|IPF1634.1|Contig4-3066_0002|orf6.7566|CA4886|CaJ7.0166|CaO19.6578|CaO19.13931|CaO19_6578|CaJ7_0166|IPF1634	Predicted membrane transporter, member of the vesicular neurotransmitter (VNT) family, major facilitator superfamily (MFS); downregulated in core caspofungin response
orf19.4393	1.6169	0.0448652	CIT1	orf19.11871|orf6.6314|IPF22877.1|IPF28424.1|Contig4-3077_0009|CA3909|CIT1.exon2|IPF3299.1	Protein described as citrate synthase; soluble protein in hyphae; biofilm induced; expression greater in high iron; upregulated upon phagocytosis; Hog1p-downregulated; regulated by Efg1p under yeast-form but not hyphal growth conditions
orf19.1403	1.61048	0.046352		orf19.8981|IPF25937.1|IPF11587.2|Contig4-2113_0002|orf6.5356|CA3175|CaO19.8981|CaO19.1403|IPF11587	Predicted ORF in Assemblies 19, 20 and 21
orf19.2619	1.6022	0.0192237	PHO113	orf19.11238|orf19.10150|orf6.4212|IPF24753.1|IPF7796.2|IPF23531.1|IPF28658.1|PHO11|Contig4-2761_0007|orf6.1652|CA0616|orf19.3754|PHO111|CaO19.2619|CaO19.10150	Protein described as a constitutive acid phosphatase; transcription is negatively regulated by Rim101p; DTT-extractable; N-glycosylated
orf19.4681	1.59683	0.0209441	RAT1	orf19.12150|IPF22542.1|IPF7491.1|Contig4-2949_0009|Contig4-2949_0010|orf6.5455|CA3242|CaO19.12150|CaO19.4681	5'-->3' exoribonuclease; similar to S. cerevisiae nuclear exoribonuclease Rat1p; suppresses S. cerevisiae kem1 mutant slow growth, mating defect, and haploid invasive growth defect
orf19.4274	1.59183	0.0163265	PUT1	orf19.11750|IPF22968.1|IPF8739.2|Contig4-2872_0006|orf6.3112|orf6.3483|CA1552|CaO19.4274|IPF8739.1	Alkaline upregulated by Rim101p
orf19.2623	1.5902	0.0227709	ECM22	orf19.10154|IPF24711.1|IPF12926.2|Contig4-2829_0014|orf6.1414|CA0471|ZCF12|CaO19.10154|CaO19.2623	Putative transcription factor with zinc cluster DNA-binding motif
orf19.3516	1.57981	0.0156517		IPF12568.1|Contig4-2428_0008|CA0805|CaO19.3516|IPF12568|orf6.1949	Predicted ORF in Assemblies 19, 20 and 21
orf19.7618	1.57826	0.0230527		IPF630.1|Contig4-3108_0080|orf6.8966|CA6016|CaO19.7618|IPF630	Predicted ORF in Assemblies 19, 20 and 21; Plc1p-regulated
orf19.1826	1.55808	0.0467748	MDM34	orf19.9385|IPF25496.1|IPF14510.2|Contig4-2618_0001|Contig4-2753_0016|orf6.3433|CA1779|CaO19.1826|CaO19.9385|IPF14510	Putative transcription factor with zinc finger DNA-binding motif; macrophage-downregulated gene
orf19.3777	1.51929	0.0170697		orf19.11258|IPF13432.2|IPF15216.2|orf6.1134|orf6.2593|CA0329|CaO19.3777|IMG2	Predicted ORF in Assemblies 19, 20 and 21
orf19.2602	1.50321	0.0211042	OPT1	orf19.10133|IPF24733.1|IPF14139.2|Contig4-1813_0003|Contig4-2970_0016|orf6.3597|CA1902|CaO19.2602|CaO19.10133	Oligopeptide transporter; transports 3-to-5-residue peptides; alleles are distinct, one has intron; not ABC or PTR type transporter; suppresses S. cerevisiae ptr2-2 mutant defects; induced by BSA or peptides; Stp3p, Hog1p regulated
orf19.4215	0.664873	0.000148562	FET34	orf19.11691|orf19.8797|orf6.5006|orf6.2939|IPF26138.1|IPF12467.2|IPF23068.1|IPF17039.1|FET5|FET34.3eoc|CA1431|CA2920|orf19.1206|FET35|FET5.5eoc	Protein similar to multicopper ferroxidase; expression greater in low iron and reduced in a fluconazole-resistant isolate; downregulated by Sfu1p, Hog1p; alkaline upregulated by Rim101p; ciclopirox olamine induced
orf19.2374	0.662237	0.0308518		orf19.9910|IPF24956.1|IPF6238.2|orf6.4772|CA2752|GAG2|CaO19.9910|CaO19.2374|IPF6238	Predicted ORF from Assembly 19; removed from Assembly 20
orf19.7196	0.653775	0.00707132		PRB1|IPF2144.1|Contig4-3097_0044|Contig4-3097_0045|orf6.8096|CA5322|CaJ7.0441|CaO19.7196|PRB12|CaO19_7196|CaJ7_0441	Protein described as a vacuolar protease; upregulated in the presence of human neutrophils
orf19.2989	0.652175	0.00166534		orf19.10506|IPF15924.2|IPF16795.1|Contig4-2184_0001|orf6.1981|orf6.5700|CA0821|CaO19.2989|IPF16795	Predicted ORF in Assemblies 19, 20 and 21
orf19.1189	0.650652	0.0264148		orf19.8780|IPF19121.2|IPF9057.2|Contig4-2980_0031|orf6.4626|orf6.861|CA2649|CaO19.1189|IPF9057	Predicted ORF in Assemblies 19, 20 and 21; transcription regulated upon yeast-hyphal switch; transcriptionally activated by Mnl1p under weak acid stress
orf19.789	0.642327	0.0463784	PYC2	orf19.8408|orf6.2989|IPF26382.1|IPF26504.1|IPF15163.2|IPF15167.2|Contig4-3027_0007|CA1464|PYC2.3f|PYC2.exon2	Putative pyruvate carboxylase, binds to biotin cofactor; up-regulated in mutant lacking the Ssk1p response regulator protein, upon benomyl treatment, or in an azole-resistant strain overexpressing MDR1
orf19.5094	0.631479	0.0269278	BUL1	orf19.12560|IPF22119.1|IPF12963.2|Contig4-2641_0004|Contig4-2641_0005|orf6.6282|CA3886|BUL5|CaO19.12560|CaO19.5094|IPF12963	Protein not essential for viability; macrophage/pseudohyphal-induced; similar to S. cerevisiae Bul1p, which may be involved in selection of substrates for ubiquitination
orf19.7150	0.631043	5.60832e-05	NRG1	IPF1932.1|Contig4-3083_0019|orf6.8050|CA5289|CaJ7.0489|CaO19_7150|CaJ7_0489|CaO19.7150	Transcriptional repressor; regulates hyphal genes, virulence genes, chlamydospore development, and genes involved in rescue and stress responses; effects both Tup1p-dependent (major) and -independent (minor) regulation
orf19.7106	0.627022	0.0371703		IPF19814.1|Contig4-3106_0075|orf6.8447|CA5594|CaJ7.0024|CaO19.7106|CaO19_7106|CaJ7_0024|IPF19814	Predicted ORF in Assemblies 19, 20 and 21
orf19.2350	0.619135	0.0257313		orf19.9886|IPF13377|IPF24976.1|IPF13377.2|Contig4-2380_0006|Contig4-2380_0007|orf6.4202|YOR378W|CA2339|CaO19.9886|CaO19.2350	Protein similar to S. cerevisiae Yor0378wp; transposon mutation affects filamentous growth; not essential for viability; member of MFS family of transporters; fungal-specific (no human or murine homolog)
orf19.946	0.612453	0.00640253	MET14	orf19.8561|IPF26346.1|IPF1543.1|Contig4-3103_0048|orf6.8195|CA5404|CaO19.946|CaO19.8561	Predicted ORF in Assemblies 19, 20 and 21; predicted role in sulfur metabolism; induced upon biofilm formation; possibly adherence-induced
orf19.2098	0.597786	0.0452649	ARO8	orf19.9645|IPF10616.3|IPF1147.2|Contig4-2564_0008|orf6.4764|orf6.7457|CA4804|CaO19.2098	Aromatic transaminase of the Ehrlich fusel oil pathway of aromatic alcohol biosynthesis; Rim101p-independent pH-regulation (alkaline induced); protein abundance is affected by URA3 expression in the CAI-4 strain background; Gcn4p-regulated
orf19.3156	0.59034	0.0392838		orf19.10665|IPF13504.2|IPF310.3|Contig4-2595_0003|Contig4-2595_0004|Contig4-2595_0005|orf6.1663|orf6.2693|CA1270|CaO19.3156|MDS1|IPF13504	Predicted ORF in Assemblies 19, 20 and 21; transcriptionally activated by Mnl1p under weak acid stress
orf19.3007.2	0.587996	0.00309372		IPF24352.1|IPF5360.1|Contig4-3096_0015|CA3119|IPF5360|IPF5360.3	ORF Predicted by Annotation Working Group
orf19.5320	0.583609	0.0428178	NCE4	orf19.12780|IPF21883.1|IPF813.1|Contig4-2899_0010|orf6.8309|CA5486|CaO19.12780|CaO19.5320|IPF813	Predicted ORF in Assemblies 19, 20 and 21; periodic mRNA expression, peak at cell-cycle G2/M phase
orf19.1183	0.580713	0.0354545		orf19.8774|IPF13094.1|IPF13902.1|Contig4-2980_0013|orf6.1749|orf6.4620|CA0678|CaO19.1183|IPF13094	Predicted ORF in Assemblies 19, 20 and 21
orf19.111	0.57339	0.0169382	CAN2	orf19.7758|IPF27165.1|IPF11927.1|Contig4-2501_0008|orf6.2565|CAN1|CaO19.111|CaO19.7758|CA1191|CA1192|IPF11926|IPF11926.1	Putative amino acid permease; transcription is regulated by Nrg1p and Tup1p; caspofungin induced; flucytosine induced; shows colony morphology-related gene regulation by Ssn6p; ; fungal-specific (no human or murine homolog)
orf19.7297	0.55987	9.50571e-05		IPF2837.2|Contig4-2774_0001|Contig4-2774_0012|orf6.8378|CA5536|CaO19.7297|IPF2837	Predicted ORF in Assemblies 19, 20 and 21; Hog1p-induced; Gcn4p-regulated; protein level decreased in stationary phase cultures
orf19.5170	0.55375	0.00488762	ENA21	orf19.12637|IPF22107.1|IPF5411.2|ENA21.3|Contig4-3092_0037|orf6.6966|CA4425|CaJ7.0331|CaO19.5170|ENA2|CaO19.12637|CaJ7_0331|CaO19_5170|ENA21.3f	Predicted ORF similar to S. cerevisiae sodium transporters Ena1p and Ena5p; Gcn4p-regulated; flucytosine, amphotericin B, or ketoconazole-induced; osmotic stress-induced; overlaps orf19.5170.1, which is annotated as a blocked reading frame
orf19.1715	0.54825	0.019454	IRO1	orf19.9283|orf6.4843|IPF11363.1|IPF29338.1|Contig4-2578_0004|Contig4-2578_0006|orf6.4845|CA2802|CaO19.9283|CaO19.1715|IPF11363	Putative transcription factor; role in iron utilization, pathogenesis; both IRO1 and adjacent URA3 are mutated in strain CAI4; suppresses S. cerevisiae aft1 mutant low-iron growth defect; hyphal-induced; reports differ about iron regulation
orf19.7561	0.542913	0.0112974	DEF1	IPF946.1|EDT1|Contig4-2780_0003|Contig4-3105_0026|Contig4-3105_0028|orf6.8909|CA5968|EED1|CaO19.7561|IPF946	Protein required for filamentous growth and for escape from epithelial cells and dissemination in an RHE model; transcription induced in oral candidiasis clinical isolates; induced by fluconazole, high cell density; hyphally regulated
orf19.2262	0.539145	0.00958968		orf19.9802|IPF25057.1|IPF11105.2|Contig4-2843_0016|orf6.5884|CA3578|ZTA1|CaO19.2262|CaO19.9802|IPF11105	Predicted ORF in Assemblies 19, 20 and 21; similar to quinone oxidoreductases; increased transcription is observed upon benomyl treatment; induced by nitric oxide; oxidative stress-induced via Cap1p
orf19.6637	0.533657	0.0163721		orf19.13958|IPF20518.1|IPF2523.2|Contig4-2856_0009|orf6.6534|CA4081|CaO19.13958|CaO19.6637|IPF2523	Predicted ORF in Assemblies 19, 20 and 21
orf19.3051	0.525338	0.0475709		orf19.10569|IPF24324.1|IPF15301.2|Contig4-3098_0020|orf6.7788|CA5076|CaO19.3051|CaO19.10569|IPF15301	Predicted ORF in Assemblies 19, 20 and 21; shows colony morphology-related gene regulation by Ssn6p
orf19.5525	0.522865	0.0300095		orf19.12971|IPF4328|IPF4328.2|IPF27985.1|Contig4-2118_0001|Contig4-2690_0006|orf6.4467|orf6.871|CA0210|CaO19.5525	Protein abundance is affected by URA3 expression in the CAI-4 strain background; regulated by Efg1p and Efh1p; repressed by Rgt1p; protein detected by mass spec in exponential and stationary phase cultures
orf19.1153	0.521194	0.00592924	GAD1	orf19.8745|IPF11712.3|IPF7609.1|Contig4-2834_0001|orf6.2779|orf6.3128|CA1564|CaO19.1153	Protein described as glutamate decarboxylase; macrophage-downregulated gene; alkaline downregulated; amphotericin B induced; transcriptionally activated by Mnl1p under weak acid stress
orf19.5372	0.520669	0.0398817		IPF6235.2|Contig4-2964_0004|orf6.4026|CA2216|CaJ7.0303|CaO19.5372|GAG4|IPF6235	Predicted ORF from Assembly 19; orf19.5372 and orf19.5373 are similar to the Tca2 (pCal) retrotransposon, which is present in strain hOG1042 as 50 to 100 copies of a linear dsDNA; removed from Assembly 20; transcription is Tbf1p-activated
orf19.2116	0.495808	0.00693692	NAT2	orf19.9664|IPF10323.1|IPF19438.2|Contig4-2832_0007|orf6.118|orf6.4745|CA2729|CaO19.2116	Predicted ORF in Assemblies 19, 20 and 21; mutation confers hypersensitivity to toxic ergosterol analog
orf19.7374	0.492939	0.00150236	CTA4	IPF1269.1|Contig4-3093_0011|orf6.8534|CA5671|CaO19.7374	Predicted transcription factor involved in response to nitric oxide; downregulated upon adherence to polystyrene; induced by nitric oxide; transcriptionally activated by Mnl1p under weak acid stress
orf19.125	0.492667	0.0109522	EBP1	orf19.7772|Contig4-2900_0026|IPF7044.2|IPF29953.1|orf6.2606|CA1216|CaO19.125	NADPH oxidoreductase; interacts with phenolic substrates, such as 17beta-estradiol; possible role in response to estrogen; induced by oxidative and weak acid stress, nitric oxide, benomyl; activated by Cap1p, Mnl1p; no mammalian homolog
orf19.4555	0.459866	0.0275541	ALS4	IPF13009.2|IPF13010.2|IPF22626.1|IPF18130.1|ALS4.3f|Contig4-2046_0006|Contig4-2931_0006|orf6.3075|CA1527|CA1528|CA5173|orf19.4556|orf19.4610.1|ALS4.5f	ALS family protein; role in adhesion and wild-type germ tube induction; growth and temperature regulated; expressed during infection of human buccal epithelial cells; down-regulated upon vaginal contact; putative GPI-anchored
orf19.5602	0.453214	0.0125443	BMT6	orf19.13045|IPF21591.1|IPF19772.1|Contig4-2108_0003|orf6.5070|CA2969|WRY2|CaO19.5602|IPF19772	Putative beta-mannosyltransferase, member of a 9-gene family that includes characterized genes BMT1, BMT2, BMT3, and BMT4 with roles in beta-1,2-mannosylation of cell wall phosphopeptidomannan; predicted ORF in Assemblies 19, 20 and 21
orf19.1093	0.441904	0.00346432	FLO8	orf19.8695|IPF26221.1|IPF10214.2|orf6.3004|CA1476|CaO19.1093|IPF10214	Transcription factor; required for wild-type hyphal formation; regulates hyphal gene expression; required for virulence in mouse systemic infection; binds Efg1p; binds Mss11p via LisH motif; has LUFS domain; ortholog of S. cerevisiae Flo8p
orf19.5612	0.429561	0.0201507	BMT4	orf19.13055|IPF15015.2|IPF13180.3|Contig4-2391_0004|orf6.1045|orf6.5060|orf6.728|CA0276|CaO19.5612|WRY1|IPF15015	Putative beta-mannosyltransferase, required for elongation of beta-mannose chains on the acid-labile fraction of cell wall phosphopeptidomannan; member of a 9-gene family; regulated by Tsa1p, Tsa1Bp
orf19.6983	0.403336	1.5819e-05		IPF2997.1|Contig4-2787_0006|orf6.7729|CA5029|CaO19.6983|IPF2997	Predicted ORF in Assemblies 19, 20 and 21; repressed by nitric oxide
orf19.780	0.399663	0.0267637	DUR1,2	orf19.8402|IPF26532.1|IPF9766.2|Contig4-2697_0006|Contig4-2697_0007|orf6.4116|CA2280|CaO19.780|DUR1|2|CaO19.8402|""DUR1|2""	Urea amidolyase, contains urea carboxylase and allophanate hydrolase activities needed to hydrolyze urea to CO2; required for utilization of urea as nitrogen source and for hyphal switch in macrophages; transcription is regulated by Nrg1p
orf19.2048	0.384316	0.0345131		orf19.9596|orf6.5987|IPF25325.1|IPF7458.1|Contig4-3065_0023|CaO19.2048|CaO19.9596	Transcription is positively regulated by Sfu1p
orf19.7350	0.383208	0.04437		IPF7109.2|Contig4-2885_0005|orf6.8510|CA5650|CaO19.7350|IPF7109	Soluble protein in hyphae; fluconazole-induced; mRNA abundance is elevated in a cyr1 or ras1 null mutant and decreased mRNA abundance in an efg1 null mutant; regulated by Nrg1p, Tup1p, Tbf1p, Ssn6p
orf19.2170	0.374486	0.00101294	PHM7	orf19.9716|IPF25099.1|IPF10153.2|Contig4-3057_0029|orf6.6093|CA3747|CaO19.2170|IPF10153	Putative transporter; fungal-specific (no human or murine homolog); Hog1p-downregulated; downregulated in response to 17-beta-estradiol, ethynyl estradiol
orf19.7381	0.362014	0.0142122		IPF1292|IPF1292.1|Contig4-3093_0048|orf6.8541|CA5678|CaO19.7381	Predicted zinc-finger protein of unknown function; not essential for viability
orf19.868	0.31614	0.0436282	ADAEC	orf19.8487|IPF3937.2|IPF3935.3|Contig4-2634_0003|orf6.2588|orf6.72|CA1203|CaO19.868|IPF3937	Transcription is specific to white cell type
orf19.2172	0.30982	0.0139639	ARA1	orf19.9718|IPF25141.1|IPF10148.2|Contig4-3057_0027|orf6.6091|CA3746|CaO19.9718|CaO19.2172	D-Arabinose dehydrogenase; in dehydro-D-arabinono-1,4-lactone biosynthesis; NADP+ cofactor; active toward D-arabinose, L-fucose, L-xylose, L-galactose; inhibited by metal ions, thiol group-specific reagents; induced on polystyrene adherence
orf19.3618	0.0777663	0.0467025	YWP1	orf19.11101|orf6.3288|FLO1|TEP1|IPF5185|CA1678|PGA24|IPF23664.1|IPF5185.2|Contig4-2227_0007|CaO19.3618|CaO19.11101	Protein with suggested role in dispersal in host; mutation causes increased adhesion and biofilm formation; putative GPI-anchor; cell wall and secreted; has stable propeptide; regulated by growth phase, phosphate, Ssk1p, Ssn6p, Efg1p, Efh1p
orf19.5741	0.0657342	0.0151084	ALS1	orf19.13163|IPF21498.1|IPF13002.2|Contig4-2848_0008|orf6.1115|CA0316|CaO19.5741|ALS1.3eoc|IPF13002.1	Adhesin; ALS family of cell-surface glycoproteins; adhesion, virulence roles; immunoprotective; in band at hyphal base; amyloid domain; biofilm-induced; Rfg1p, Ssk1p, growth-regulated; strain background affects expression

## Sheet: flo8_1h37C
Experiment	flo8 mutant hyphae 1h 37C
Time	1h 37C
Systematic	Normalized	t-test P-value	Common	Synonyms	Description
orf19.4211	9.59145	0.0116064	FET3	orf19.11687|FET33|IPF11908.2|IPF19406.2|Contig4-2671_0009|Contig4-2671_0010|orf6.176|orf6.5010|CA2924|CaO19.4211|FET31|CaO19.11687	Multicopper oxidase; required for growth under low-iron conditions; null mutant shows decreased prostaglandin E2 production; functional homolog of S. cerevisiae Fet3p; ketoconazole, caspofungin, amphotericin B repressed
orf19.54	4.88104	0.0269471	RHD1	orf19.7715|IPF27198.1|IPF13148.2|Contig4-2469_0001|orf6.4552|CA2597|BMT2|WRY7|CaO19.7715|CaO19.54|IFQ3	Putative beta-mannosyltransferase, required for the addition of beta-mannose to the acid-labile fraction of cell wall phosphopeptidomannan; member of a 9-gene family; transcriptionally regulated on yeast-hyphal and white-opaque switches
orf19.6417	3.86257	0.0241242	TSR1	orf19.13775|IPF20707.1|IPF1334.1|Contig4-3073_0011|orf6.7837|CA5114|tsr1|CaO19.13775|CaO19.6417|IPF1334	Predicted ORF in Assemblies 19, 20 and 21; decreased expression in response to prostaglandins
orf19.254	3.64916	0.00533484		orf19.7886|IPF18861.2|IPF16370.2|Contig4-2723_0001|orf6.1987|orf6.691|CA0152|CaO19.254|IPF16368.3f	Predicted ORF in Assemblies 19, 20 and 21; Hog1p-downregulated
orf19.1566	3.64268	0.0481426	UTP21	orf19.9139|IPF25737.1|IPF14782.2|Contig4-2110_0005|Contig4-2110_0006|orf6.6423|CA3990|CaO19.1566|CaO19.9139|IPF14782	Predicted ORF in Assemblies 19, 20 and 21; physically interacts with TAP-tagged Nop1p
orf19.655	3.25447	0.0160197	PHO84	orf19.8269|orf19.8765|IPF26171.1|IPF7638.2|IPF26640.1|IPF5438.2|orf6.447|orf6.3437|CA1782|CA0083|orf19.1172|PHO84.5eoc	Protein similar to high-affinity phosphate transporters; expression is regulated upon white-opaque switching or biofilm formation; Hog1p, ciclopirox olamine or alkaline induced; caspofungin or stress repressed; upregulated in RHE model
orf19.6420	3.25417	0.0149536	PGA13	orf19.13778|IPF20734.1|IPF1341.1|Contig4-3073_0004|orf6.7834|CA5112|CaO19.6420|CaO19.13778|IPF1341	Putative GPI-anchored protein; described as similar to mucins; induced during cell wall regeneration, and during core caspofungin response; regulated by Tsa1p, Tsa1Bp in minimal media at 37 deg and by Cyr1p, Nrg1p, Tup1p, Rlm1p
orf19.220	3.23042	0.000910879	PIR1	orf19.7851|orf6.474|PIR2|IPF15363.2|IPF19968.1|orf6.5153|CA3030|CaO19.220|IPF19968	Structural protein of cell wall; 1,3-beta-glucan-linked; O-glycosylated by Pmt1p; N-mannosylated; tandem repeats; heterozygous mutant has cell wall defects; hyphal repressed; Hog1p, fluconazole, hypoxia induced; iron, Efg1p, Plc1p regulated
orf19.7219	3.17557	0.00128458	FTR1	orf6.8119|IPF868.1|Contig4-3043_0004|CA5345|CaO19.7219	High-affinity iron permease (ferric citrate, ferrioxamines E or B, transferrin); required for mouse virulence, low-iron growth; iron, amphotericin B, caspofungin, ciclopirox, Hog1p regulated; complements S. cerevisiae ftr1 iron transport
orf19.5305	3.04478	0.0146852	RHD3	orf19.12765|orf6.8294|PGA29|IPF21875.1|IPF8527.1|Contig4-2961_0009|CA5476|LDG7|CaO19.12765|CaO19.5305|IPF8527	Putative GPI-anchored protein that localizes to the cell wall; transcription is decreased upon yeast-hyphal switch; transcriptionally regulated by iron; expression greater in high iron; clade-associated gene expression
orf19.7618	2.99279	0.0390178		IPF630.1|Contig4-3108_0080|orf6.8966|CA6016|CaO19.7618|IPF630	Predicted ORF in Assemblies 19, 20 and 21; Plc1p-regulated
orf19.7011	2.98855	0.0323827		IPF2342.1|Contig4-3091_0046|orf6.7937|CA5197|CaJ7.0121|CaO19_7011|CaJ7_0121|CaO19.7011|IPF2342	Predicted ORF in Assemblies 19, 20 and 21
orf19.6656	2.95285	0.0201737	DUR3	IPF2277.1|Contig4-3038_0003|orf6.6765|CA4263|CaO19.6656|IPF2277	Putative protein of unknown function, transcription is upregulated in clinical isolates from HIV+ patients with oral candidiasis; alkaline downregulated; amphotericin B induced; shows colony morphology-related gene regulation by Ssn6p
orf19.1578	2.91397	0.0456569		orf19.9151|IPF25824.1|IPF9638.2|Contig4-3005_0028|Contig4-3005_0029|orf6.5342|CA3165|CaO19.1578|RRP5|CaO19.9151|FMI1	Predicted ORF in Assemblies 19, 20 and 21
orf19.3276	2.9042	0.0161777	PWP2	orf19.10786|IPF23987.1|IPF290.1|Contig4-2791_0009|orf6.8276|CA5466|CaO19.10786|CaO19.3276	Predicted ORF in Assemblies 19, 20 and 21; downregulated during core stress response; decreased expression in response to prostaglandins; physically interacts with TAP-tagged Nop1p
orf19.3897	2.85909	0.000739395		orf19.11378|IPF23260.1|IPF19897.1|Contig4-2263_0011|orf6.2342|CA1050|CaO19.11378|CaO19.3897|IPF19897	Predicted ORF in Assemblies 19, 20 and 21; decreased transcription is observed upon fluphenazine treatment or in an azole-resistant strain that overexpresses CDR1 and CDR2; transcription is repressed in response to alpha pheromone in SpiderM medium
orf19.1886	2.8357	0.0360537	RCL1	orf19.9442|IPF25440.1|IPF9148.2|Contig4-2743_0006|orf6.190|orf6.7034|CA0027|CaO19.1886	Predicted ORF in Assemblies 19, 20 and 21; essential; downregulated during core stress response; S. cerevisiae ortholog is essential
orf19.2917	2.7955	0.0278024		orf19.10434|IPF24432.1|IPF16748.2|Contig4-2802_0011|orf6.3461|CA1803|CaO19.10434|CaO19.2917|IPF16748	Putative protein of unknown function; heterozygous null mutant exhibits resistance to parnafungin in the C. albicans fitness test; predicted ORF in Assemblies 19, 20 and 21
orf19.3015	2.75495	0.0460286	ARX1	orf19.10533|IPF24288.1|IPF3709.1|Contig4-3096_0039|orf6.7752|CA5051|CaO19.10533|CaO19.3015|IPF3709	Predicted ORF in Assemblies 19, 20 and 21; downregulated during core stress response; decreased expression in response to prostaglandins
orf19.3682	2.75308	0.0197703	CWH8	orf19.11166|IPF23608.1|IPF10381.2|Contig4-2750_0005|orf6.2497|CA1146|CaO19.11166|CAX4|CaO19.3682	Putative dolichyl pyrophosphate (Dol-P-P) phosphatase; ketoconazole-induced; expression is increased in a fluconazole-resistant isolate; clade-associated gene expression
orf19.7215	2.7474	0.0498277		IPF883.1|Contig4-3017_0022|orf6.8115|CA5340|CaO19.7215|IPF883	Predicted ORF in Assemblies 19, 20 and 21
orf19.512	2.71761	0.0460873		orf19.8143|IPF11315.2|IPF29817.1|Contig4-3063_0012|Contig4-3063_0014|orf6.6724|orf6.7058|CA4498|CaO19.8143|CaO19.512|IPF11315|CA4229|IPF12480.5|IPF12480.1	Predicted ORF in Assemblies 19, 20 and 21; essential; S. cerevisiae ortholog is essential
orf19.1646	2.71318	0.0134532		orf19.9215|IPF11615.2|IPF29332.1|Contig4-2368_0004|orf6.2334|CA1047|MRD1|CaO19.1646|IPF11615|CA3995|IPF11615.3eoc|IPF10438.1	Predicted ORF in Assemblies 19, 20 and 21
orf19.1902	2.63586	0.000437943	NOC4	orf19.9458|IPF25429.1|IPF9717.2|Contig4-2752_0016|orf6.7018|CA4470|CaO19.1902|CaO19.9458|IPF9717	Predicted ORF in Assemblies 19, 20 and 21; mutation confers resistance to 5-fluorocytosine (5-FC), 5-fluorouracil (5-FU), and tubercidin (7-deazaadenosine)
orf19.3327	2.62928	0.0197142	TRM2	orf19.10837|IPF23931.1|IPF8326.2|Contig4-2976_0009|orf6.5027|CA2936|CaO19.10837|TRM21|CaO19.3327|IPF8326	Predicted ORF in Assemblies 19, 20 and 21; decreased expression in response to prostaglandins
orf19.6766	2.62815	0.0423355		orf19.14058|IPF20375.1|IPF2798.1|Contig4-3030_0014|orf6.8865|CA5935|NOP13|CaO19.6766|CaO19.14058|IPF2798	Predicted ORF in Assemblies 19, 20 and 21
orf19.3895	2.5869	0.0107952	CHT2	orf19.11376|orf6.2344|IPF19719.2|IPF15860.2|Contig4-2459_0002|CA1051|CaO19.3895	Chitinase; putative N-terminal catalytic domain, GPI anchor, O-mannosylated region, signal peptide; 3 N-glycosylation motifs; downregulated in core caspofungin response; induced in yeast-form cells; Cyr1p-, Efg1p-, pH-regulated
orf19.5991	2.56969	0.0293446		orf19.13412|IPF21153.1|IPF6.1|Contig4-2512_0001|orf6.9046|CA6072|DBP10|CaO19.5991|CaO19.13412	Predicted ORF in Assemblies 19, 20 and 21
orf19.5063	2.53322	0.0126906		orf19.12529|IPF17932.1|IPF13493.1|Contig4-1378_0002|Contig4-1944_0005|orf6.1609|orf6.468|CA0586|CaO19.5063|IPF13493	Predicted ORF in Assemblies 19, 20 and 21; ciclopirox olamine induced; regulated by Ssn6p; induced by nitric oxide in yhb1 mutant
orf19.6041	2.46578	0.00219295	RPO41	orf19.13462|IPF21121.1|IPF1453.2|Contig4-3053_0037|orf6.7585|CA4904|CaO19.6041|CaO19.13462	Predicted ORF in Assemblies 19, 20 and 21; downregulated during core stress response
orf19.6710	2.45493	0.0329907	UTP9	orf19.14002|IPF20369.1|IPF3618.2|Contig4-1879_0002|orf6.6859|CA4339|CaO19.6710|CaO19.14002|IPF3618	Predicted ORF in Assemblies 19, 20 and 21; decreased expression observed in an ssr1 homozygous null mutant; decreased expression in response to prostaglandins; physically interacts with TAP-tagged Nop1p
orf19.6234	2.40225	0.00826412		orf19.13614|IPF12148.1|IPF12516.1|Contig4-2906_0007|orf6.1584|orf6.5122|CA3007|CaO19.6234|IPF12148	Predicted ORF in Assemblies 19, 20 and 21; mutation confers hypersensitivity to 5-fluorocytosine (5-FC), 5-fluorouracil (5-FU), and tubercidin (7-deazaadenosine)
orf19.3962	2.37787	0.0186244	HAS1	orf19.11444|IPF5784.3|IPF28555.1|Contig4-3081_0007|Contig4-3081_0009|orf6.1551|orf6.3509|CA0554|CaO19.3962|IPF5784.2	Functional homolog of S. cerevisiae Has1p, which is a nucleolar protein of the DEAD-box ATP-dependent RNA helicase family that is involved in biogenesis of the ribosome, particularly the small (40S) subunit; caspofungin-downregulated
orf19.3288	2.3704	0.0170935	NMA111	orf19.10798|IPF23911.1|IPF12606.1|orf6.1778|CA0693|orf19.6008.1|orf19.3288.1|IPF12606.5eoc	Predicted ORF in Assemblies 19, 20 and 21; macrophage-induced gene; downregulated in core stress response; fungal-specific (no human or murine homolog); merged with orf19.3288.1 in Assembly 21
orf19.4792	2.36579	0.00126647		orf19.12256|IPF22407.1|IPF8336.2|Contig4-2744_0009|orf6.4902|CA2839|CaO19.4792|IPF8336	Predicted ORF in Assemblies 19, 20 and 21; Plc1p-regulated; possibly spurious ORF (Annotation Working Group prediction)
orf19.6052	2.30218	0.0432959	CNS1	orf19.13473|IPF21066.1|IPF1432.1|Contig4-3053_0020|orf6.7596|CA4912|CaO19.13473|CaO19.6052	Predicted ORF in Assemblies 19, 20 and 21; mutation confers hypersensitivity to radicicol
orf19.7422	2.29951	0.00704109		IPF2440.1|Contig4-2982_0008|orf6.8582|CA5718|LCP5|CaO19.7422	Predicted ORF in Assemblies 19, 20 and 21
orf19.7657	2.29486	0.0312992	POP3	IPF4924.1|Contig4-3003_0028|orf6.9005|CA6042|CaO19.7657|IPF4924	Predicted ORF in Assemblies 19, 20 and 21; decreased expression in response to prostaglandins
orf19.3304	2.29479	0.0367777		orf19.10814|IPF23947.1|IPF7950.2|Contig4-2860_0018|orf6.7199|CA4613|CaO19.10814|RRP40|CaO19.3304|IPF7950	Predicted ORF in Assemblies 19, 20 and 21
orf19.4401	2.28097	0.0309505	YVH1	orf19.11879|IPF22890.1|IPF14891.2|Contig4-1712_0003|orf6.6306|CA3902|CaO19.4401|CaO19.11879	Putative dual specificity phosphatase (phosphoserine/threonine and phosphotyrosine phosphatase); similar to S. cerevisiae Yvh1p; required for wild-type growth rate and for wild-type virulence in mouse model of systemic infection
orf19.5106	2.26503	0.00259731	DIP2	orf19.12572|IPF22110.1|IPF14262.2|Contig4-2615_0005|Contig4-2615_0006|orf6.6344|CA3927|CaO19.12572|CaO19.5106	Protein similar to S. cerevisiae Dip2p, of small ribonucleoprotein complex; transposon mutation affects filamentous growth; physically interacts with TAP-tagged Nop1p; heterozygous null mutant exhibits resistance to parnafungin
orf19.7387	2.26499	0.0110961		IPF3330.1|Contig4-3036_0021|orf6.8547|CA5685|CaO19.7387|ELP3|HPA1	Predicted ORF in Assemblies 19, 20 and 21
orf19.5356	2.26095	0.00151378		orf19.12816|IPF21819.1|IPF741.1|Contig4-3102_0027|orf6.8345|CA5510|CaO19.12816|CaO19.5356|IPF741	Predicted ORF in Assemblies 19, 20 and 21; downregulated during core stress response
orf19.6355	2.24622	0.0274316		orf19.13712|IPF20800.1|IPF11376.2|Contig4-2117_0001|orf6.5784|CA3508|RRB1|CaO19.6355|CaO19.13712|RSA2	Predicted ORF in Assemblies 19, 20 and 21
orf19.6818	2.24414	0.0337606		orf19.14110|IPF20440.1|IPF2409.2|Contig4-2745_0001|orf6.8813|CA5889|CaO19.14110|CaO19.6818|IPF2409	Predicted ORF in Assemblies 19, 20 and 21
orf19.6297	2.22138	0.0435043		orf19.13676|IPF20852.1|IPF15695.1|Contig4-2128_0002|orf6.5447|CA3236|DEG1|CaO19.6297|CaO19.13676	Predicted ORF in Assemblies 19, 20 and 21
orf19.1362	2.20844	0.0310486	SMM1	orf19.8942|IPF25948.1|IPF8910.2|Contig4-2717_0007|orf6.5294|CA3131|CaO19.8942|CaO19.1362|IPF8910	Predicted ORF in Assemblies 19, 20 and 21; transcription is upregulated in both intermediate and mature biofilms
orf19.1830	2.20629	0.0355486		orf19.9389|IPF25491.1|IPF16475.1|Contig4-1874_0001|orf6.1220|CaO19.9389|CaO19.1830	Predicted ORF in Assemblies 19, 20 and 21
orf19.2360	2.16819	0.0204195	URA2	orf19.9896|IPF10801.3|IPF29131.1|Contig4-2886_0007|Contig4-2886_0008|orf6.2755|orf6.610|CA1315|CaO19.2360|URA2.5eoc|IPF10801.2	Predicted ORF in Assemblies 19, 20 and 21; flucytosine induced; macrophage/pseudohyphal-induced; intron in 5'-UTR
orf19.7062	2.15533	0.0275874	RPA135	IPF479.1|Contig4-3106_0073|orf6.8491|CA5633|CaJ7.0071|CaO19.7062|CaJ7_0071|CaO19_7062	Predicted ORF in Assemblies 19, 20 and 21; decreased expression in response to prostaglandins
orf19.2504	2.13294	0.0491965	BMS1	orf19.10040|IPF24887.1|IPF4009.2|Contig4-2895_0007|orf6.2327|CA1041|CaO19.10040|CaO19.2504	Predicted ORF in Assemblies 19, 20 and 21; mutation confers resistance to 5-fluorocytosine (5-FC); flucytosine induced; decreased expression in response to prostaglandins
orf19.2998	2.11159	0.027501	TSR2	orf19.10515|IPF24349.1|IPF5607.1|Contig4-3020_0003|orf6.4867|CA2814|CaO19.2998|CaO19.10515|IPF5607	Predicted ORF in Assemblies 19, 20 and 21; decreased expression in response to prostaglandins
orf19.5198	2.11131	0.0367287	NOP4	orf19.12665|IPF22023.1|IPF7589.1|Contig4-2882_0011|orf6.3414|CA1766|CaO19.12665|CaO19.5198	Predicted ORF in Assemblies 19, 20 and 21; mutation confers hypersensitivity to 5-fluorocytosine (5-FC), 5-fluorouracil (5-FU), and tubercidin (7-deazaadenosine); downregulated in core stress response
orf19.7392	2.09831	0.00773293		IPF3320.1|Contig4-3036_0007|orf6.8552|CA5691|DED1|CaO19.7392	Predicted ORF in Assemblies 19, 20 and 21
orf19.4399	2.09578	0.0357563		orf19.11877|IPF14888.2|IPF28426.1|Contig4-3077_0001|orf6.6308|CA3904|CaO19.11877|CaO19.4399|IPF14888	Predicted ORF in Assemblies 19, 20 and 21
orf19.5704	2.08485	0.00600381		orf19.13127|IPF17898.2|IPF8477.1|Contig4-2522_0007|orf6.151|orf6.4634|CA2655|CaO19.5704|IPF8477	Predicted ORF in Assemblies 19, 20 and 21
orf19.25	2.07278	0.0139778		orf19.7696|IPF27221.1|IPF3857.1|Contig4-3047_0024|orf6.5919|CA3608|CaO19.25|TRM10|CaO19.7696|IPF3857	Predicted ORF in Assemblies 19, 20 and 21
orf19.2847	2.05418	0.031943		orf19.10366|IPF17922.3|IPF15457.2|Contig4-2393_0003|orf6.186|orf6.4941|CA2869|RPC82|CaO19.2847	Predicted ORF in Assemblies 19, 20 and 21
orf19.4342	2.05175	0.00723587		orf19.11817|IPF11357.2|IPF14623.2|Contig4-2344_0008|orf6.1848|orf6.2799|CA1344|CaO19.4342|IPF14623	Predicted ORF in Assemblies 19, 20 and 21
orf19.4363	2.04962	0.0420725	SGD1	orf19.11841|YLR336C|Contig4-2883_0005|IPF7574.2|IPF28445.1|Contig4-2883_0008|Contig4-2883_0011|orf6.2425|orf6.3775|CA2035|CaO19.4363|CA2034|SGD1.3f|IPF18558.1|SGD1.5f	Predicted ORF in Assemblies 19, 20 and 21; downregulated during core stress response; transcription is increased in populations of cells exposed to fluconazole over multiple generations
orf19.3331	2.04172	0.00570133	ABC1	orf19.10842|IPF14939.2|IPF17140.3|Contig4-2339_0002|orf6.3338|orf6.5023|CA1712|CaO19.3331	Protein described as ubiquinol-cytochrome-c reductase; induced upon adherence to polystyrene
orf19.500	2.03866	0.0319425		orf19.8130|IPF26791.1|IPF15038.2|Contig4-2231_0002|orf6.7071|CA4506|CaO19.500|GCD10|CaO19.8130	Predicted ORF in Assemblies 19, 20 and 21
orf19.4078	2.03734	0.0196017		orf19.11559|IPF2068.3|IPF28525.1|Contig4-2072_0004|orf6.3202|CA1618|RRP45|CaO19.4078|IPF2068.2	Predicted ORF in Assemblies 19, 20 and 21
orf19.1673	2.02723	0.0481502	PPT1	orf19.9242|orf6.1084|IPF25613.1|IPF14222.3|Contig4-2335_0002|CA0298|CaO19.1673|IPF14222.2	Protein described as serine/threonine phosphatase; transcriptionally regulated by iron; expression greater in high iron
orf19.2454	2.01509	0.00653878	PHO87	orf19.9990|orf6.1540|PHO98|IPF19824.2|IPF14853.2|Contig4-2200_0003|Contig4-2200_0004|Contig4-2200_0005|orf6.104|orf6.293|CA0548|CaO19.2454|CA0015|PHO87.5eoc|IPF19824.1	Protein similar to phosphate permeases; transcription is negatively regulated by Rim101p at pH 8; expression is regulated upon white-opaque switching; caspofungin repressed; biofilm-regulated; virulence-group-correlated expression
orf19.4635	2.0128	0.0290574	NIP1	orf19.12105|IPF22546.1|IPF8998.2|Contig4-2825_0008|orf6.1839|orf6.2373|CA0733|CaO19.4635	Putative translation initiation factor; mutation confers hypersensitivity to roridin A and verrucarin A; genes encoding ribosomal subunits, translation factors, and tRNA synthetases are downregulated upon phagocytosis by murine macrophage
orf19.610	2.00383	0.0113743	EFG1	IPF3577.2|IPF3575.2|Contig4-2215_0003|orf6.2978|orf6.4821|CA2787|orf19.8243	Transcriptional repressor; required for white-phase cell type; hyphal growth, metabolism, cell-wall gene regulator; roles in adhesion, virulence; Cph1p and Efg1p have role in host cytokine response; bHLH; binds E-box; T206 phosphorylated
orf19.4746	1.99776	0.0108346	JIP5	orf19.12208|IPF14019|IPF14019.1|IPF13928.2|orf6.3658|orf6.4016|CA1950|CaO19.4746	Protein not essential for viability; downregulated during core stress response
orf19.3362	1.99407	0.00144318		orf19.10870|IPF23891.1|IPF15758.2|Contig4-2353_0001|orf6.1783|CaO19.10870|CaO19.3362	Predicted ORF in Assemblies 19, 20 and 21
orf19.4479	1.99014	0.00757284		orf19.11959|orf19.11960|IPF22770.1|IPF22776.1|IPF13757.2|IPF13756.2|Contig4-2664_0018|Contig4-2664_0021|orf6.4308|orf6.4307|CA2414|CA2413|orf19.4480|IPF13756.3f	Predicted ORF in Assemblies 19, 20 and 21; downregulated during core stress response
orf19.5436	1.98303	0.011928	UTP8	orf19.12891|IPF21700.1|IPF1136.2|Contig4-2896_0004|Contig4-2896_0005|orf6.8672|CA5787|CaO19.5436|CaO19.12891|IPF1136	Essential protein involved in tRNA export from the nucleus and ribosomal small subunit biogenesis; physically interacts with TAP-tagged Nop1p
orf19.5987	1.96043	0.0114866		orf19.13408|IPF21213.1|IPF11.1|Contig4-2427_0004|orf6.9050|CA6074|CaO19.13408|CaO19.5987|IPF11	Predicted ORF in Assemblies 19, 20 and 21
orf19.2115	1.9552	0.00359963		orf19.9663|IPF10325.2|IPF19439.2|Contig4-2832_0006|orf6.117|orf6.4746|CA2730|CaO19.2115|IPF10325	Putative molybdopterin-converting factor; fungal-specific (no human or murine homolog)
orf19.5635	1.94817	0.0196858	PGA7	orf19.13080|IPF21547.1|IPF12101.1|CRW3|Contig4-1570_0002|orf6.4504|CA2557|CaO19.5635|CaO19.13080|IPF12101	Protein described as a putative precursor of a hyphal surface antigen; putative GPI-anchor; induced by ciclopirox olamine, ketoconazole, or by Rim101p at pH 8; regulated during planktonic growth; induced during cell wall regeneration
orf19.2671	1.94086	0.00368852		orf19.10186|orf6.154|IPF24612.1|IPF10564.2|Contig4-2584_0001|orf6.5563|CA3328|CaO19.2671|CaO19.10186|IPF10564	Predicted ORF in Assemblies 19, 20 and 21; Plc1p-regulated
orf19.1944	1.94017	0.00195413	GPR1	orf19.9499|IPF11281.2|IPF29241.1|Contig4-2985_0021|Contig4-2985_0023|orf6.5595|CA3354|CaO19.1944|CaO19.9499|CA3354 gi:30513635|IPF11281	Putative G-protein-coupled receptor of plasma membrane; required for wild-type hyphal growth; acts in cAMP-PKA pathway; reports differ on role in cAMP-mediated glucose signaling; Gpr1p C terminus binds Gpa2p; regulates HWP1 and ECE1
orf19.3287	1.93816	0.0404324	BUD22	orf19.10797|IPF24049.1|IPF16944.2|Contig4-1655_0004|orf6.8287|CA5474|IPF16944.3eoc	Predicted ORF in Assemblies 19, 20 and 21; downregulated during core stress response; decreased expression in response to prostaglandins
orf19.3159	1.93246	0.0400554	UTP20	orf19.9300|orf19.9301|orf19.10668|IPF25622.1|IPF25609.1|IPF18641.1|IPF18640.1|IPF24144.1|IPF14693.2|orf6.3233|orf6.3232|orf6.2690|YBL004|CA1640|CA1639|CA1268|orf19.1732|orf19.1733|CaO19.10668|CaO19.3159|IPF14693	Protein likely to be essential for growth; similar to S. cerevisiae Utp20p, which is a putative snoRNA-binding protein; downregulated in core stress response; mutation confers resistance to 5-fluorocytosine (5-FC) and parnafungin
orf19.1842	1.90171	0.00524369		orf19.9401|CDC25|IPF18345.2|IPF16030.2|Contig4-2086_0003|orf6.1252|orf6.5609|orf6.5610|CA0382|CaO19.1842|IPF16030	Predicted ORF in Assemblies 19, 20 and 21
orf19.920	1.89764	0.014871	RMT2	orf19.8535|IPF19012.2|IPF16809.2|Contig4-2402_0003|orf6.1242|orf6.571|CA0119|RMT2.5eoc	Minor protein arginine methyltransferases (PRMT) involved in methylation of arginine residues
orf19.2003	1.89365	0.0131254	HNM1	orf19.9554|IPF4757.1|IPF19469.2|Contig4-2862_0011|orf6.42|orf6.6357|CA3939|HNM2|CaO19.2003	Predicted ORF in Assemblies 19, 20 and 21; mutation confers hypersensitivity to toxic ergosterol analog; shows colony morphology-related gene regulation by Ssn6p; clade-associated gene expression
orf19.6418	1.87269	0.0257173		orf19.13776|IPF20737.1|IPF20026.1|Contig4-3073_0009|Contig4-3073_0010|orf6.7836|CA5113|CaO19.13776|CaO19.6418|IPF20026	Predicted ORF in Assemblies 19, 20 and 21
orf19.4173	1.86213	0.0443408		orf19.11649|IPF16546.1|IPF23088.1|IPF6183.2|Contig4-2948_0015|orf6.814|orf6.6067|CA3723|orf19.1174|CaO19.11649|DPH2|CaO19.4173	Predicted ORF in Assemblies 19, 20 and 21
orf19.1701	1.84986	0.0159223	RKI1	orf19.9268|IPF13663.2|IPF29351.1|Contig4-2869_0008|orf6.3042|CA1503|CaO19.9268|CaO19.1701	Predicted ORF in Assemblies 19, 20 and 21
orf19.969	1.84189	0.0101328		orf19.8584|PRS1|IPF26333.1|IPF1582.1|Contig4-3103_0021|orf6.8218|CA5419|CaO19.969|PRS11|CaO19.8584	Predicted ORF in Assemblies 19, 20 and 21
orf19.3103	1.84073	0.00300575		orf19.10615|IPF24220.1|IPF13155.2|Contig4-2940_0002|Contig4-2940_0003|orf6.6942|CA4407|CaO19.3103|RPO3|RPO31	Predicted ORF in Assemblies 19, 20 and 21
orf19.498	1.84063	0.0421814		orf19.8128|IPF26789.1|IPF8974.2|Contig4-2904_0001|orf6.7073|CA4508|CaO19.8128|NAM9|CaO19.498	Predicted ORF in Assemblies 19, 20 and 21
orf19.4940	1.83712	0.0491951		orf19.12406|IPF22247.1|IPF7876.2|Contig4-2962_0002|orf6.6050|HIP1|CA3708|CaO19.4940|CaO19.12406	Putative histidine permease; fungal-specific (no human or murine homolog)
orf19.1437	1.83607	0.000352561		orf19.9011|orf6.154|IPF19556.1|orf6.1055|CaO19.1437	Transcription is negatively regulated by Sfu1p; removed from Assembly 20
orf19.5847	1.82379	0.00873609		orf19.13269|IPF21366.1|IPF3777.1|Contig4-2975_0014|orf6.4949|CA2878|CaO19.5847|COP1|CaO19.13269|RET1	Predicted ORF in Assemblies 19, 20 and 21
orf19.5401	1.81323	0.000362646		orf19.12856|IPF21702.1|IPF1084.2|IPF1084.3|Contig4-3071_0012|orf6.8637|CA5762|CaO19.12856|CaO19.5401|IFF10.3f	Predicted ORF in Assemblies 19, 20 and 21; mutation confers hypersensitivity to toxic ergosterol analog; decreased transcription is observed upon fluphenazine treatment
orf19.4889	1.81257	0.00473538		orf19.12354|IPF22405.1|IPF7544.2|Contig4-2934_0016|orf6.3333|CA1709|HOL1|CaO19.4889|CaO19.12354|HOL2	Predicted membrane transporter, member of the drug:proton antiporter (12 spanner) (DHA1) family, major facilitator superfamily (MFS)
orf19.4681	1.81109	0.0243176	RAT1	orf19.12150|IPF22542.1|IPF7491.1|Contig4-2949_0009|Contig4-2949_0010|orf6.5455|CA3242|CaO19.12150|CaO19.4681	5'-->3' exoribonuclease; similar to S. cerevisiae nuclear exoribonuclease Rat1p; suppresses S. cerevisiae kem1 mutant slow growth, mating defect, and haploid invasive growth defect
orf19.4167	1.79573	0.0038269		orf19.11643|IPF6192.2|IPF17807.3|orf6.125|orf6.6061|CA3717|CaO19.4167|IPF6192	Predicted ORF in Assemblies 19, 20 and 21
orf19.7115	1.79095	0.0326184	SAC7	IPF5642.1|Contig4-2995_0014|orf6.8438|CA5584|CaJ7.0013|CaO19.7115	Protein described as a GTPase activating protein (GAP) for RHO1; downregulated upon adherence to polystyrene; macrophage/pseudohyphal-repressed; transcription is upregulated in RHE model of oral candidiasis and in clinical oral candidiasis
orf19.4029	1.78415	0.00629783		orf19.11512|IPF23256.1|IPF3377.1|Contig4-3094_0019|orf6.7442|CA4794|CaO19.4029|SQT1|CaO19.11512	Predicted ORF in Assemblies 19, 20 and 21
orf19.2143	1.78107	0.00131947		orf19.9690|IPF25218.1|IPF17094.2|Contig4-2481_0003|orf6.5377|CA3187|CaO19.9690|CaO19.2143|IPF17094	Predicted ORF in Assemblies 19, 20 and 21
orf19.6070	1.7727	0.038926	ENA2	orf19.13491|orf6.7614|ENA22|IPF21137.1|IPF1398.2|Contig4-2977_0027|Contig4-2977_0028|CA4929|CaO19.6070|CaO19.13491	Protein described as sodium transporter; transcription is upregulated in response to ciclopirox olamine; alkaline upregulated by Rim101p; repressed upon high-level peroxide stress; upregulated in oral candidiasis clinical isolates
orf19.6829	1.77	0.00759398		orf19.14121|IPF20334.1|IPF12074.2|Contig4-2530_0011|orf6.8802|CA5880|AEP2|CaO19.14121|CaO19.6829|IPF12074	Predicted ORF in Assemblies 19, 20 and 21
orf19.581	1.7618	0.00218938		orf19.8214|IPF19045.1|IPF6394.1|Contig4-2778_0002|orf6.1110|orf6.1112|orf6.5699|CA3436|CaO19.581|NRD1	Putative protein of unknown function, transcription is upregulated in an RHE model of oral candidiasis; predicted ORF in Assemblies 19, 20 and 21
orf19.5626	1.74995	0.0431001		orf19.13071|IPF15013.2|IPF27980.1|Contig4-2416_0007|orf6.4785|CA2761|CaO19.5626|IPF15013	Predicted ORF in Assemblies 19, 20 and 21; Plc1p-regulated; transcriptionally activated by Mnl1p under weak acid stress
orf19.3034	1.74525	0.0498568	RLI1	orf19.10552|IPF24273.1|IPF8493.1|Contig4-3098_0053|orf6.7771|CA5063|CaO19.10552|CaO19.3034|IPF8493	Member of RNase L inhibitor (RLI) subfamily of ABC family; predicted not to be a transporter
orf19.3066	1.7421	0.00441158	ENG1	orf19.10584|IPF9751.2|IPF28933.1|Contig4-2792_0015|Contig4-2792_0016|Contig4-2952_0001|orf6.7803|YNR67|ACF3|orf19.71|DSE4|CaO19.3066|CA5091	Endo-1,3-beta-glucanase required for cell separation after division, orthologous to S. cerevisiae Dse4p; caspofungin repressed; fungal-specific (no human or murine homolog); repressed in response to alpha pheromone in SpiderM medium
orf19.7223	1.73977	0.0186459		IPF863.1|Contig4-3043_0010|orf6.8123|CA5348|CaO19.7223|IPF863	Predicted ORF in Assemblies 19, 20 and 21
orf19.3124	1.73517	0.00478805		orf19.10636|IPF24183.1|IPF12414.2|Contig4-2435_0009|orf6.6921|CA4387|CaO19.10636|MAP1|CaO19.3124	Predicted ORF in Assemblies 19, 20 and 21
orf19.4721	1.73236	0.0122619		orf19.12184|IPF22424.1|IPF15728.2|Contig4-2780_0007|orf6.3183|CA1601|CaO19.12184|CaO19.4721|IPF15728	Predicted ORF in Assemblies 19, 20 and 21; possibly spurious ORF (Annotation Working Group prediction)
orf19.7599	1.73059	0.00934412	UTP5	IPF668.2|Contig4-3108_0035|orf6.8947|CA5999|CaO19.7599|IPF668	Predicted ORF in Assemblies 19, 20 and 21; mutation confers resistance to 5-fluorocytosine (5-FC), 5-fluorouracil (5-FU), and tubercidin (7-deazaadenosine); physically interacts with TAP-tagged Nop1p
orf19.3170	1.7291	0.0418837		orf19.10680|IPF18726.2|IPF3178.2|Contig4-2939_0001|orf6.1165|orf6.1234|orf6.2668|CA0378|CaO19.3170|IPF3178	Predicted ORF in Assemblies 19, 20 and 21
orf19.3265	1.72443	0.0148353	TRM1	orf19.10775|IPF24029.1|IPF272.1|Contig4-2793_0003|orf6.8265|CA5457|CaO19.10775|CaO19.3265	Protein described as an N2,N2-dimethylguanine tRNA methyltransferase; induced upon adherence to polystyrene
orf19.4698	1.72263	0.0377743	PTC8	orf19.12168|IPF22595.1|IPF15977.2|orf6.1685|CA0641|CaO19.12168|DHP99|CaO19.4698|IPF15977	Predicted type 2C protein phosphatase, serine/threonine-specific; required for hyphal growth; induced under stress
orf19.7316	1.72092	0.0148124		IPF5971.1|Contig4-2983_0024|Contig4-2983_0025|orf6.8397|CA5552|CaO19.7316|IPF5971	Predicted ORF in Assemblies 19, 20 and 21; mutation confers hypersensitivity to 5-fluorocytosine (5-FC), 5-fluorouracil (5-FU), and tubercidin (7-deazaadenosine); induced by nitric oxide
orf19.4328	1.71576	0.0189545	CCC2	orf19.11803|orf6.3258|IPF23037.1|IPF12705.2|CA1655|CaO19.4328|CaO19.11803	Copper-transporting P-type ATPase of Golgi; required for wild-type iron assimilation (indirect effect via Fet3p); induced by iron starvation, ciclopirox olamine; caspofungin repressed; not required for virulence in mouse systemic infection
orf19.7451	1.70752	0.00261472	FUN31	IPF2894.1|Contig4-2597_0004|Contig4-3064_0016|orf6.8611|orf6.974|CA5742|PSK1|CaO19.7451|PSK2	Putative PAS kinase involved in cell wall damage response; similar to S. cerevisiae Psk1p, which is a putative serine/threonine protein kinase; transcriptionally activated by Mnl1p under weak acid stress
orf19.558	1.70126	0.041183	GUT1	orf19.8193|IPF26747.1|IPF3751.2|orf6.2137|CA0929|CaO19.8193|CaO19.558	Protein described as glycerol kinase; downregulated upon adherence to polystyrene; greater mRNA abundance observed in a cyr1 homozygous null mutant than in wild type
orf19.7069	1.69919	0.0224359		IPF495.1|Contig4-3106_0065|orf6.8484|CA5627|CaJ7.0064|CaO19_7069|CaJ7_0064|CaO19.7069|IPF495	Predicted ORF in Assemblies 19, 20 and 21
orf19.4669	1.69915	0.0265151	AAT22	orf19.12139|IPF18504.2|IPF7410.2|Contig4-2599_0006|orf6.4067|CA2244|CaO19.4669|CaO19.12139	Protein not essential for viability; similar to S. cerevisiae Aat2p, which is an aspartate aminotransferase involved in nitrogen metabolism; clade-associated gene expression; protein level decreased in stationary phase cultures
orf19.6720	1.69816	0.0307127		orf19.14012|IPF20405.1|IPF3634.1|Contig4-2901_0002|orf6.6869|CA4346|YDR090C|CaO19.6720|CaO19.14012|IPF3634	Predicted ORF in Assemblies 19, 20 and 21; similar to S. cerevisiae Ydr090cp; transposon mutation affects filamentous growth
orf19.6136	1.69739	0.0422249		orf19.13555|IPF20986.1|IPF12778.1|Contig4-2201_0003|orf6.5678|CA3419|CaO19.6136|MRPL4|CaO19.13555|IPF12778	Predicted ORF in Assemblies 19, 20 and 21; repressed by nitric oxide
orf19.2527	1.69589	0.035261		orf19.10062|IPF24756.1|IPF4983.1|Contig4-2933_0017|orf6.3370|CA1736|CaO19.2527|CaO19.10062|IPF4983	Predicted ORF in Assemblies 19, 20 and 21; induced upon biofilm formation
orf19.5081	1.69543	0.00201306	FUN12	orf19.12547|IPF22183.1|IPF8722.1|Contig4-2712_0006|orf6.6295|CA3894|CaO19.12547|CaO19.5081|YIF2	Functional homolog of S. cerevisiae Fun12p translation initiation factor eIF5B; genes encoding ribosomal subunits, translation factors, and tRNA synthetases are downregulated upon phagocytosis by murine macrophage
orf19.4097	1.69382	0.0115403		orf19.11578|IPF23130.1|IPF2097.2|Contig4-3095_0039|Contig4-3095_0040|orf6.6839|CA4322|CaO19.4097|CaO19.11578|IPF2097	Predicted ORF in Assemblies 19, 20 and 21
orf19.518	1.69288	0.033139		orf19.8149|IPF26766.1|IPF8167.2|Contig4-3063_0021|orf6.6730|CA4235|NCL1|CaO19.518	Predicted ORF in Assemblies 19, 20 and 21
orf19.7534	1.68047	0.00900253	MIS12	IPF349.1|Contig4-3048_0003|Contig4-3048_0004|CA5869|CaO19.7534|MIS1|orf6.8786	Predicted ORF in Assemblies 19, 20 and 21
orf19.3559	1.67938	0.0357994		orf19.11043|orf19.11044|IPF23746.1|IPF23749.1|IPF3184.1|IPF3182.1|Contig4-2222_0002|Contig4-2222_0003|orf6.1603|orf6.1602|CA0579|orf19.3560|IPF3184|CA0580|IPF3184.exon2|IPF3184.exon1	Predicted ORF in Assemblies 19, 20 and 21
orf19.1361	1.67642	0.0165822		orf19.8941|IPF25963.1|IPF8911.2|Contig4-2717_0005|orf6.5293|CA3130|CaO19.8941|TIM23|CaO19.1361	Predicted ORF in Assemblies 19, 20 and 21
orf19.663	1.67631	0.0125863	GIN4	orf19.8280|IPF26652.1|IPF3994.2|Contig4-2788_0002|orf6.6556|CA4097|CaO19.8280|CaO19.663	Kinase involved in pseudohyphal-to-hyphal switch; phosphorylates Cdc11p on S395 (regulatory); autophosphorylates; necessary for septin ring within germ tube, but not for septin band at mother cell junction; role in cytokinesis
orf19.1253	1.67551	0.0121097		orf19.8838|IPF14649.2|IPF10541.2|Contig4-2799_0001|orf6.3005|orf6.5720|CA3452|CaO19.1253|IPF10541	Predicted ORF in Assemblies 19, 20 and 21; transcriptionally activated by Mnl1p under weak acid stress
orf19.2488	1.67179	0.0273717	FAL1	orf19.10024|IPF24847.1|IPF9226.2|Contig4-2966_0007|orf6.6169|CA3808|CaO19.10024|CaO19.2488	Predicted ORF in Assemblies 19, 20 and 21
orf19.3480	1.66571	0.00898973		orf19.10984|IPF23789.1|IPF17681.2|Contig4-1435_0004|orf6.4979|CA2899|CaO19.10984|RSM23|CaO19.3480|IPF17681	Predicted ORF in Assemblies 19, 20 and 21
orf19.4519	1.66011	0.0318344	SUV3	orf19.11994|IPF22739.1|IPF15527.2|orf6.4992|CA2908|CaO19.4519|CaO19.11994	Protein required for chlamydospore formation, for embedded hyphal growth, and for wild-type respiratory growth; similar to S. cerevisiae Suv3p, which is an RNA helicase involved in mitochondrial RNA catabolism
orf19.3755	1.65977	0.0358577		orf19.11239|orf19.13720|IPF23510.1|IPF18800.1|IPF20807.1|IPF11656.2|Contig4-2678_0018|orf6.2261|orf6.5792|CA3515|orf19.6363|CaO19.3755|MRPL152|CaO19.11239	Predicted ORF in Assemblies 19, 20 and 21
orf19.825	1.65888	0.00671132	GCD7	orf19.8445|IPF26437.1|IPF8759.2|Contig4-2913_0005|orf6.6716|CA4222|CaO19.8445|CaO19.825	Protein described as a translation initiator; downregulated in the presence of human whole blood or polymorphonuclear (PMN) cells
orf19.3098	1.64965	0.000342792		orf19.10610|IPF24199.1|IPF1751.2|Contig4-2877_0004|orf6.6947|CA4411|CaO19.10610|BRR2|CaO19.3098	Predicted ORF in Assemblies 19, 20 and 21
orf19.4375	1.64634	0.0329097		orf19.11853|IPF22895.1|IPF9435.1|Contig4-2849_0013|orf6.4540|CA2586|CaO19.4375|CaO19.11853|IPF9435	Predicted ORF in Assemblies 19, 20 and 21
orf19.7231	1.64249	0.0158784	FTR2	orf6.8131|IPF853.1|Contig4-3043_0021|CA5354|CaO19.7231	High-affinity iron permease; not required for mouse systemic virulence; regulated by iron level, ciclopirox olamine, amphotericin B, caspofungin; complements S. cerevisiae ftr1 iron transport defect; probably interacts with ferrous oxidase
orf19.3207	1.63513	0.0208553	CCN1	orf19.10719|CLN1|IPF24117.1|IPF15597.2|Contig4-2538_0006|orf6.4392|CA2479|CaO19.10719|CaO19.3207	G1 cyclin; required for hyphal growth maintenance (not initiation); cell-cycle regulated transcription (G1/S); Cdc28p-Ccn1p initiates Cdc11p S394 phosphorylation on hyphal induction; expression in S. cerevisiae inhibits pheromone response
orf19.989	1.63202	0.0100213		orf19.8604|IPF9936.2|IPF6773.2|IPF20059.1|Contig4-2262_0002|orf6.5809|orf6.1598|CA6251|CA3526|orf19.990.1|MRPS5|MRPS5.5f|MRPS5.3f	Predicted ORF in Assemblies 19, 20 and 21
orf19.1105	1.63042	0.0333889		orf19.8701|IPF26202.1|IPF15959.2|Contig4-2815_0001|orf6.753|CA0170|CaO19.1105|CaO19.8701|IPF15959	Predicted ORF in Assemblies 19, 20 and 21; possibly spurious ORF (Annotation Working Group prediction)
orf19.4219	1.62834	0.027272	RIX7	orf19.11695|IPF22933.1|IPF3147.2|Contig4-2936_0001|orf6.2764|CA1318|YLL34|CaO19.4219|CaO19.11695|IPF3147	Protein similar to S. cerevisiae Rix7p which is a putative ATPase of the AAA family required for ribosomal subunit export from the nucleus; mutation impairs hyphal growth and biofilm formation
orf19.4808	1.62745	0.00730922	NUP188	orf19.12271|IPF22490.1|IPF6113.2|Contig4-3040_0030|orf6.5214|CA3071|CaO19.4808|CaO19.12271	Transcription is regulated by Nrg1p and Mig1p
orf19.5267	1.62725	0.0254773		orf19.12732|IPF21970.1|IPF2053.1|Contig4-3082_0012|orf6.7675|CA4983|CaO19.12732|CaO19.5267|IPF2053	Putative cell wall protein; downregulated in core caspofungin response; transcription is repressed in response to alpha pheromone in SpiderM medium; transcription repressed in ace2 null mutant
orf19.985	1.62477	0.00385732		orf19.8600|IPF9929.2|IPF18934.2|Contig4-2694_0006|orf6.1594|orf6.5813|CA3529|CaO19.985|IPF9929	Predicted ORF in Assemblies 19, 20 and 21
orf19.73	1.61912	0.0224267		orf19.7724|IPF17657.3|IPF17430.1|orf6.22|orf6.1372|orf6.79|CA0011|orf19.62|CaO19.73|IPF17430.5eoc|IPF17430	Predicted ORF in Assemblies 19, 20 and 21
orf19.2823	1.60629	0.00590653	RFG1	orf19.10341|orf6.1681|IPF14334.2|orf6.1166|orf6.1680|ROX1|CA6270|CA0346|orf19.2824|RFG1.5f	Transcriptional regulator of filamentous growth and hyphal genes; acts in Tup1p-dependent and -independent pathways; binds DNA; has HMG domain; not transcriptionally regulated by oxygen or serum; not responsible for hypoxic repression
orf19.6570	1.60399	0.0385162	NUP	orf19.13923|orf6.7558|IPF20601.1|IPF1651.1|Contig4-2887_0014|CA4882|CaJ7.0175|NUP32|CaO19.6570|CaO19.13923|CaJ7_0175|CaO19_6570|IPF1651	Nucleoside permease; adenosine and guanosine are substrates, whereas cytidine, adenine, guanine, uridine, uracil are not; similar to a nucleoside permease of S. pombe; possibly processed by Kex2p
orf19.1697	1.60337	0.0168115		orf19.9264|IPF25640.1|IPF13221.2|Contig4-2869_0013|orf6.3038|CA1500|CaO19.9264|CaO19.1697|IPF13221	Predicted ORF in Assemblies 19, 20 and 21
orf19.488	1.60273	0.0119057	MEX67	orf19.8118|IPF26772.1|IPF7086.2|Contig4-2779_0001|orf6.7083|CA4517|CaO19.8118|CaO19.488	Nuclear export protein; has NTF2-like domain; interacts with Mtr2p via the NTF2-like domain
orf19.3479	1.59324	0.0449026		orf19.10983|IPF23798.1|IPF11732.2|Contig4-2835_0002|orf6.4980|CaO19.10983|CaO19.3479	Predicted ORF in Assemblies 19, 20 and 21
orf19.4261	1.58383	0.0209756	TIF5	orf19.11737|IPF15194.3|IPF28461.1|orf6.1736|CA0667|CaO19.4261|CaO19.11737|IPF15194.2	Putative translation initiation factor; genes encoding ribosomal subunits, translation factors, and tRNA synthetases are downregulated upon phagocytosis by murine macrophage
orf19.7088	1.5822	0.0443782		IPF529.1|Contig4-3106_0032|orf6.8465|CA5611|CaJ7.0044|CaO19.7088|SUA5|CaJ7_0044|CaO19_7088	Predicted ORF in Assemblies 19, 20 and 21
orf19.4381	1.58006	0.0429522	VTC3	orf19.11859|IPF22866.1|IPF3271.2|orf6.6326|VTC2|CA3918|CaO19.4381|CaO19.11859	Putative polyphosphate synthetase; downregulated in core caspofungin response; Hog1p-induced; transcription is opaque-specific; fungal-specific (no human or murine homolog)
orf19.4705	1.57885	0.0440478		orf19.12176|IPF19340.2|IPF4444.2|Contig4-2960_0015|orf6.327|orf6.3516|CCA1|CaO19.4705|CA1841	Predicted ORF in Assemblies 19, 20 and 21
orf19.3582	1.57717	0.0101876		orf19.11066|IPF23740.1|IPF3229.1|Contig4-2234_0003|orf6.5747|CA3477|CaO19.11066|CaO19.3582|IPF3229	Predicted ORF in Assemblies 19, 20 and 21
orf19.7358	1.57645	0.00706495		IPF14683.2|Contig4-2195_0001|orf6.8518|CA5656|CaO19.7358|IPF14683	Predicted ORF in Assemblies 19, 20 and 21
orf19.5193	1.57335	0.0211748		orf19.12660|IPF7602|IPF22028.1|IPF7602.3|Contig4-1399_0002|Contig4-2882_0001|orf6.3409|CA1761|FMA1|CaO19.12660|CaO19.5193|IPF7602.2	Protein similar to oxidoreductases; transcription is upregulated in response to treatment with ciclopirox olamine; upregulation correlates with clinical development of fluconazole resistance; merged with orf19.6837 in Assembly 20
orf19.4536	1.57112	0.0225967	CYS4	orf19.12011|IPF22713.1|IPF8061.2|Contig4-2727_0001|orf6.6682|CA4195|CaO19.4536|CaO19.12011	Predicted enzyme of sulfur amino acid biosynthesis; antigenic in mouse; upregulated in biofilm; alkaline upregulated; macrophage/pseudohyphal-induced
orf19.6213	1.56905	0.0478436	SUI2	orf19.13594|IPF20923.1|IPF13764.2|Contig4-2125_0001|orf6.4525|CA2573|CaO19.13594|CaO19.6213	Putative translation initiation factor; genes encoding ribosomal subunits, translation factors, and tRNA synthetases are downregulated upon phagocytosis by murine macrophage; protein detected by mass spec in stationary phase cultures
orf19.4120	1.56749	0.046581	LAS1	orf19.11602|IPF23142.1|IPF5882.2|Contig4-3052_0028|orf6.3193|CA1610|CaO19.4120|CaO19.11602	Predicted ORF in Assemblies 19, 20 and 21; mutation confers hypersensitivity to 5-fluorocytosine (5-FC), 5-fluorouracil (5-FU); macrophage-induced gene
orf19.6363	1.56224	0.0105869		orf19.13720|IPF20807.1|IPF11656.2|Contig4-2678_0018|orf6.5792|CA3515|CaO19.6363|MRPL151|CaO19.13720|MRPL15	Predicted ORF from Assembly 19; merged with orf19.3755 in Assembly 20
orf19.585	1.55836	0.0177194		orf19.8217|IPF26717.1|IPF20133.1|Contig4-2778_0007|orf6.5695|CA3432|CaO19.585|MRPL17|CaO19.8217	Predicted ORF in Assemblies 19, 20 and 21
orf19.7489	1.55355	0.0165496		IPF434.1|Contig4-3107_0010|orf6.8741|CA5834|CaO19.7489|LRG1	Predicted ORF in Assemblies 19, 20 and 21
orf19.3228	1.54967	0.0139598		orf19.10738|IPF24004.1|IPF171.2|Contig4-3001_0019|Contig4-3001_0021|Contig4-3001_0023|orf6.3027|CA1494|CaO19.10738|CaO19.3228|IPF171	Predicted ORF in Assemblies 19, 20 and 21; mutation confers hypersensitivity to amphotericin B
orf19.4447	1.54347	0.0365646	YMC1	orf19.11927|IPF22816.1|IPF6563.1|Contig4-2378_0001|orf6.7260|CA4660|CaO19.4447|CaO19.11927	Predicted ORF in Assemblies 19, 20 and 21; flucytosine induced
orf19.4537	1.54207	0.0131006		orf19.12012|IPF22720.1|IPF8059.2|Contig4-2727_0002|orf6.6683|CA4196|DST1|CaO19.4537|CaO19.12012	Predicted ORF in Assemblies 19, 20 and 21
orf19.2019	1.53613	0.0288572		orf19.9569|IPF4102.2|IPF19890.2|Contig4-2305_0004|orf6.2113|orf6.2380|CA0910|MRPL16|CaO19.2019	Predicted ORF in Assemblies 19, 20 and 21
orf19.7376	1.53355	0.0185948		IPF1272.1|Contig4-3093_0013|orf6.8536|CA5673|CaO19.7376|IPF1272	Predicted ORF in Assemblies 19, 20 and 21
orf19.6322	1.53261	0.0438612	ARD	ARDH|ARD8|IPF14294.1|Contig4-2795_0014|orf6.5515|CA3288|ARD1|CaO19.6322	D-arabitol dehydrogenase, NAD-dependent (ArDH); enzyme of D-arabitol and D-arabinose catabolism; D-arabitol is a marker for active infection in humans; has conserved YXXXK motif of short-chain alcohol-polyol-sugar dehydrogenases
orf19.6442	1.53124	0.0116818	PRP8	orf19.13800|IPF20757.1|IPF1378.2|Contig4-3074_0021|Contig4-3074_0023|Contig4-3074_0024|orf6.7812|CA5099|CaO19.13800|CaO19.6442	Protein similar to S. cerevisiae Prp8p; transcription is repressed in response to alpha pheromone in SpiderM medium
orf19.6938	1.5301	0.00312838	MEU1	orf19.14200|IPF20196.1|IPF5890.2|Contig4-3085_0005|Contig4-3085_0007|orf6.7324|CA4708|CaO19.6938|CaO19.14200	Predicted ORF in Assemblies 19, 20 and 21;protein level decreased in stationary phase cultures
orf19.5083	1.52595	0.00170279	DRG1	orf19.12549|IPF22140.1|IPF8715.2|Contig4-2712_0003|orf6.6293|CA3893|FUN11|CaO19.12549|CaO19.5083	Member of the DRG family of GTP-binding proteins; involved in regulation of invasive filamentous growth
orf19.5953	1.52577	0.043671		orf19.13374|IPF21219.1|IPF72.1|Contig4-3087_0031|orf6.9084|CA6103|SFP1|CaO19.5953|CaO19.13374	Predicted ORF in Assemblies 19, 20 and 21
orf19.6558	1.52561	0.000304849		orf19.13911|IPF20542.1|IPF1677.1|Contig4-2941_0003|orf6.7546|CA4872|CaJ7.0187|CaJ7_0187|CaO19_6558|CaO19.6558|SEC232|sec231|CaO19.13911	Predicted ORF in Assemblies 19, 20 and 21
orf19.7218	1.52414	0.00814629	RBE1	PRY2|IPF872.1|Contig4-2519_0004|orf6.8118|CA5344|CaO19.7218	Putative cell wall protein; transcription is negatively regulated by Rim101p, Efg1p, Ssn6p; alkaline downregulated; predicted signal sequence, O-glycosylation; no GPI anchor predicted
orf19.2760	1.52302	0.0201981		orf19.10276|IPF24586.1|IPF11996.2|Contig4-3083_0006|orf6.1333|orf6.6592|orf6.6593|CA0426|CFT1|CaO19.2760	Putative protein of unknown function; heterozygous null mutant exhibits hypersensitivity to parnafungin and cordycepin in the C. albicans fitness test; predicted ORF in Assemblies 19, 20 and 21
orf19.7057	1.5175	0.00877038		IPF470.1|Contig4-2959_0005|orf6.8496|CA5638|CaJ7.0076|CaO19_7057|CaJ7_0076|CaO19.7057|IPF470	Predicted ORF in Assemblies 19, 20 and 21; protein detected by mass spec in stationary phase cultures
orf19.3840	1.51722	0.000454733		orf19.11321|IPF23489.1|IPF4087.1|Contig4-3060_0022|orf6.7535|CA4864|CaO19.11321|CaO19.3840|IPF4087	Predicted ORF in Assemblies 19, 20 and 21
orf19.863	1.51624	0.00358379		orf19.8482|IPF26428.1|IPF7643.1|Contig4-2942_0011|orf6.3551|CA1863|CaO19.863|MRPL35|CaO19.8482	Predicted ORF in Assemblies 19, 20 and 21
orf19.6133	1.51418	0.00714431	PIF1	orf19.13552|IPF19672.2|IPF19673.2|Contig4-2334_0002|orf6.5114|orf6.5681|CA3002|CaO19.6133|IPF19673.1	Decreased transcription is observed upon fluphenazine treatment
orf19.5166	1.51339	0.0162745	DBF4	orf19.12633|IPF22054.1|IPF5578.1|Contig4-3092_0030|orf6.6970|CA4429|CaJ7.0336|CaJ7_0336|CaO19_5166|CaO19.5166|CaO19.12633	Predicted ORF in Assemblies 19, 20 and 21; macrophage/pseudohyphal-repressed; cell-cycle regulated periodic mRNA expression; S. cerevisiae ortholog is not cell-cycle regulated
orf19.680	1.51296	0.039275		orf19.8297|IPF18893.2|IPF7706.2|Contig4-2776_0008|orf6.1796|orf6.6573|CA4115|TIM50|CaO19.680|IPF7706	Predicted ORF in Assemblies 19, 20 and 21
orf19.1217	1.51213	0.0371132		orf19.8806|IPF9507.2|IPF16011.2|Contig4-2370_0009|orf6.669|orf6.3079|CA1532|CaO19.1217|IPF9507.3f|IPF9507	Predicted ORF in Assemblies 19, 20 and 21
orf19.5439	1.50748	0.0229898		orf19.12894|IPF21698.1|IPF1144.2|orf6.8675|CA5790|CaO19.12894|CaO19.5439|IPF1144	Predicted ORF in Assemblies 19, 20 and 21
orf19.5402	1.5052	0.00315832		IPF21765.1|IPF1081.2|orf6.8638	ORF Predicted by Annotation Working Group
orf19.1956	1.50415	0.00356559		orf19.9511|IPF19331.2|IPF14757.2|Contig4-2143_0002|orf6.342|orf6.4083|CA2256|CaO19.1956|IPF14757	Predicted ORF in Assemblies 19, 20 and 21
orf19.48	1.50245	0.0341843		orf19.7710|orf19.8369|orf6.534|IPF17790.3|IPF29973.1|IPF26514.1|IPF17515.2|Contig4-1613_0005|orf6.202|orf6.1208|CA0030|CA0103|orf19.749|IPF17790.5eoc|IPF17790|IPF17790.2	Predicted ORF in Assemblies 19, 20 and 21; likely to be essential for growth, based on an insertional mutagenesis strategy; virulence-group-correlated expression
orf19.2533.1	0.662284	0.038129		IPF24724.1|IPF4995.1|Contig4-2933_0004|CA1072|SBH1	ORF Predicted by Annotation Working Group
orf19.3259	0.66106	0.014687		orf19.10769|IPF24057.1|IPF252.1|Contig4-2987_0017|orf6.8259|CA5452|SEC11|CaO19.10769|CaO19.3259	Predicted ORF in Assemblies 19, 20 and 21
orf19.7006	0.660644	0.011058		IPF11756.2|orf6.7932|CA5194|CaJ7.0126|CaO19_7006|CaJ7_0126|IPF11756	Predicted ORF in Assemblies 19, 20 and 21
orf19.5671	0.660291	0.0252051		orf19.13116|IPF21511.1|IPF11299.2|Contig4-3054_0001|orf6.6911|CA4378|CaO19.5671|CaO19.13116|IPF11299	Predicted ORF in Assemblies 19, 20 and 21
orf19.1338	0.657253	0.0189766		orf19.8918|IPF7930.1|IPF19386.2|Contig4-3068_0028|orf6.3891|CA2121|CaJ7.0389|CaO19_1338|CaJ7_0389|CaO19.8918|CaO19.1338|IPF7930	Predicted ORF in Assemblies 19, 20 and 21
orf19.7580	0.656029	0.0155805		IPF912.1|Contig4-3105_0068|orf6.8928|CaO19.7580	Predicted ORF in Assemblies 19, 20 and 21
orf19.5968	0.655255	0.0158537	RDI1	orf19.13389|IPF21259.1|IPF40.1|Contig4-3042_0013|orf6.9069|CA6089|CaO19.5968|CaO19.13389	Protein similar to S. cerevisiae Rdi1p, an inhibitor of Rho-GDP dissociation; transposon mutation affects filamentous growth; farnesol-, filament-induced; regulated by Nrg1p, Tup1p
orf19.6544	0.65515	0.00147716	LPI9	orf19.13897|IPF20671.1|IPF15433.2|Contig4-2763_0002|orf6.5271|CA3110|CaJ7.0205|CaJ7_0205|CaO19_6544|CaO19.6544|CaO19.13897	Predicted ORF in Assemblies 19, 20 and 21
orf19.940	0.653253	0.0319796	BUD2	orf19.8555|orf6.8189|IPF26369.1|IPF9663.2|Contig4-2510_0003|CA5397|CaO19.940|CaO19.8555|IPF9663	GTPase activating protein (GAP) for Rsr1p; negative regulator of filament branching, acts in hyphal growth guidance; required for wild-type budding pattern; expression greater in low iron; regulated by tyrosol and cell density
orf19.1591	0.651489	0.0275414	ERG10	IPF13331.2|POT14|orf6.1069|CA0290|CaO19.1591	Protein similar to acetyl-CoA acetyltransferase; role in ergosterol biosynthesis; soluble in hyphae; changes in protein abundance associated with azole resistance; fluconazole or ketoconazole induced; macrophage-downregulated protein
orf19.5691	0.651124	0.0204698	CDC11	IPF5456.1|Contig4-2927_0014|orf6.4569|CA2610|CaO19.5691	Septin; required for wild-type cell and hyphal morphology, agar-invasive growth, full virulence and kidney tissue invasion in mouse, but not for kidney colonization, immunogenicity; phosphorylation is hyphal- and cell-cycle-regulated
orf19.701	0.650983	0.00859666	CFL11	orf19.8320|IPF26596.1|IPF7992.1|FRE8|CFL96|CFL9|Contig4-2984_0006|orf6.3325|CA1701|CaO19.8320|CaO19.701	Predicted ORF in Assemblies 19, 20 and 21; similar to ferric reductase Fre10p; flucytosine repressed; possibly adherence-induced
orf19.4930	0.649328	0.00709265	SPC3	orf19.12396|orf6.5910|IPF22286.1|IPF15621.2|Contig4-2611_0002|CA3600|CaO19.12396|CaO19.4930	Essential protein; similar to S. cerevisiae Spc3p, a component of the signal peptidase complex required for signal peptidase activity; predicted integral ER membrane protein; complements spc3 and suppresses sec61 S. cerevisiae mutants
orf19.2149	0.648193	0.0303278		orf19.9696|IPF25180.1|IPF11607.2|Contig4-2303_0004|orf6.5383|CA3189|CaO19.9696|CaO19.2149|IPF11607	Predicted ORF in Assemblies 19, 20 and 21
orf19.5129	0.646704	0.015604		orf19.12594|IPF22063.1|IPF14562.1|Contig4-2185_0008|orf6.3402|CA1756|CaJ7.0375|PMP4|CaO19.12594|CaO19_5129|CaJ7_0375|CaO19.5129|IPF14562	Predicted ORF in Assemblies 19, 20 and 21
orf19.4270	0.646552	0.0469206		orf19.11746|IPF22942.1|IPF9529.2|orf6.3487|CA1820|CaO19.11746|CaO19.4270|IPF9529	Predicted ORF in Assemblies 19, 20 and 21
orf19.4077	0.645908	0.0443631	MIT1	orf19.11558|SUR1|IPF2067.2|IPF28522.1|Contig4-2072_0001|Contig4-2072_0002|orf6.3203|CA1619|CaO19.11558|CaO19.4077|IPF2067	Protein involved in sphingolipid biosynthesis; required for mannosylation of inositol phosphoceramide (IPC) to form mannosylated sphingolipids MIPC and M(IP)2C; fluconazole, caspofungin induced; macrophage-downregulated gene
orf19.2768	0.6454	0.0205398	AMS1	orf19.10284|IPF24664.1|IPF7076.2|Contig4-2513_0006|orf6.6584|CA4123|CaO19.2768|CaO19.10284	Putative alpha-mannosidase; transcription is regulated by Nrg1p; induced during cell wall regeneration
orf19.4594	0.644972	0.00636065		orf19.12063|IPF22628.1|IPF994.1|Contig4-3104_0059|orf6.7893|CA5156|CaO19.4594|CLC1|CaO19.12063	Predicted ORF in Assemblies 19, 20 and 21
orf19.1078	0.643078	0.0220398	HBR2	orf19.8679|orf19.8680|IPF26229.1|IPF26228.1|IPF14203.2|IPF14202.2|Contig4-2068_0002|orf6.2148|orf6.2149|CA0934|CA0935|orf19.1079|IPF14203.3f	Uncharacterized protein, regulated by Gcn4p and hemoglobin; protein detected by mass spec in stationary phase cultures
orf19.3720	0.64232	0.0181892		orf19.11204|IPF23525.1|IPF18822.1|Contig4-2685_0003|orf6.2193|CA0961|CaO19.3720|CaO19.11204|IPF18822	Predicted ORF in Assemblies 19, 20 and 21
orf19.6684	0.640551	0.0215681	PNC1	orf19.13976|orf19.14000|IPF20488.1|IPF20011.1|IPF20491.1|IPF6660.2|IPF6660|Contig4-3088_0002|orf6.6793|orf6.6817|CA4286|CA4308|CaJ7.0402|orf19.6708|IPF20011.5f	Putative nicotinamidase, involved in NAD salvage pathway; decreased transcription is observed in an azole-resistant strain that overexpresses MDR1
orf19.3438	0.640414	0.01123		orf19.10942|IPF23837.1|IPF7178.2|Contig4-2644_0011|orf6.6467|CA4025|CaO19.10942|SCJ1|CaO19.3438	Predicted ORF in Assemblies 19, 20 and 21
orf19.5526	0.639726	0.0377472	SEC20	orf19.12972|IPF19118.2|IPF4329.2|Contig4-2690_0005|orf6.4468|orf6.870|CA2526|CaO19.5526	Essential protein; similar to S. cerevisiae Sec20p; depletion causes membrane accumulation and drug sensitivity; expression regulated by growth phase; O-mannosylation regulates proteolysis; does not complement S. cerevisiae sec20-1 mutant
orf19.4044	0.638955	0.0246716	MUM2	orf19.11526|IPF23292.1|IPF7220.2|Contig4-3094_0002|orf6.4410|CA2490|CaO19.4044|CaO19.11526	Protein similar to S. cerevisiae Mum2p; transcription is induced in response to alpha pheromone in SpiderM medium; transcription is regulated by Tup1p
orf19.3549	0.637815	0.0485696	CDC21	orf19.11033|TMP1|IPF19442.2|IPF13364.2|Contig4-1753_0001|orf6.102|orf6.4652|CA2665|CaO19.3549|CaO19.11033	Predicted ORF in Assemblies 19, 20 and 21; flucytosine induced; transcription is downregulated in both intermediate and mature biofilms
orf19.3515	0.636758	0.0332441		IPF12570.2|Contig4-2428_0007|CA0804|CaO19.3515|BNA1|orf6.1948	Putative 3-hydroxyanthranilic acid dioxygenase, involved in NAD biosynthesis
orf19.86	0.635784	4.10457e-05		orf19.7731|GPX1|IPF27177.1|IPF13207.2|Contig4-2178_0004|orf6.1559|CA0559|CaO19.86|GPS2|CaO19.7731|HYR1	Protein described as glutathione peroxidase; macrophage-downregulated gene
orf19.999	0.635312	0.0253618	GCA2	IPF16527.3|IPF16526.2|Contig4-2932_0004|orf6.5798|orf6.5799|CA3518|GCA1|AMYG2.5f|AMYG2|IPF6791.2	Predicted extracellular glucoamylase, promotes biofilm matrix formation
orf19.6796	0.634659	0.0143399		orf19.14088|IPF20413.1|IPF5962.1|Contig4-2796_0005|orf6.8835|CA5909|CaO19.6796|YSA1|CaO19.14088	Predicted ORF in Assemblies 19, 20 and 21
orf19.7479	0.630586	0.0155801	NTH1	orf6.8731|NTC1|IPF2490.1|Contig4-2988_0007|CA5824|CaO19.7479	Neutral trehalase; hyphal induction in homozygous null mutant is delayed but not reduced overall; not required for virulence in mouse systemic infection; homodimeric enzyme; possible regulatory cAMP-dependent phosphorylation at S10 and S213
orf19.5147	0.630501	0.0385513		orf19.12613|IPF18318.1|IPF12332.2|Contig4-2330_0005|Contig4-3092_0001|orf6.5950|CA3627|CaJ7.0356|CaJ7_0356|CaO19_5147|CaO19.5147|IPF18318	Predicted ORF in Assemblies 19, 20 and 21
orf19.847	0.630063	0.0215522	YIM1	orf19.8467|IPF3415.2|IPF29656.1|IPF3415|Contig4-2477_0005|orf6.3747|CA2016|CaO19.847|CaO19.8467	Protein similar to protease of mitochondrial inner membrane; increased transcription is observed upon benomyl treatment; macrophage-downregulated gene
orf19.5642	0.629281	0.0286329		orf19.13087|IPF21553.1|IPF19953.1|Contig4-2558_0008|orf6.4511|CA2562|CaO19.13087|CaO19.5642|IPF19953	Predicted ORF in Assemblies 19, 20 and 21; shows colony morphology-related gene regulation by Ssn6p; greater mRNA abundance observed in a cyr1 homozygous null mutant than in wild type
orf19.479.2	0.625475	0.0266083		IPF26812.1|IPF7098.2|Contig4-2441_0008|CA4525|SEC22	ORF Predicted by Annotation Working Group
orf19.2283	0.625346	0.039877	DQD1	orf19.9823|IPF10071.2|IPF29159.1|Contig4-3049_0012|orf6.2251|orf6.2443|CA0996|CaO19.2283|DQD99|IPF10071	Predicted ORF in Assemblies 19, 20 and 21; ketoconazole-repressed; macrophage-downregulated protein abundance
orf19.3803	0.62344	0.0283738	MNN22	orf19.11284|IPF10363.2|IPF10361.3|Contig4-2432_0003|orf6.1866|orf6.264|CA0752|MNN24|CaO19.3803	Protein described as similar to Golgi alpha-1,2-mannosyltransferase; regulated by Tsa1p, Tsa1Bp in minimal media at 37 deg; Hog1p-induced; induced by nitric oxide; downregulated in core stress response
orf19.7362	0.622535	0.00631995	SKN1	orf6.8522|IPF1245.1|SKN1.3|Contig4-2926_0022|Contig4-2926_0023|CA5660|SKN1.3f	Protein with predicted role in beta-1,6-glucan synthesis; probable N-glycosylated type II membrane protein; transcription and change in mRNA length induced by yeast-hyphal transition; transcription induced by Rim101p or caspofungin
orf19.5438	0.621581	0.0124762		orf19.12893|IPF21785.1|IPF1143.1|orf6.8674|CA5789|CaO19.5438|CaO19.12893|IPF1143	Predicted ORF in Assemblies 19, 20 and 21
orf19.2374	0.62099	0.0238761		orf19.9910|IPF24956.1|IPF6238.2|orf6.4772|CA2752|GAG2|CaO19.9910|CaO19.2374|IPF6238	Predicted ORF from Assembly 19; removed from Assembly 20
orf19.4579	0.620599	0.0374382		orf19.12048|IPF22619.1|IPF1022.1|Contig4-3104_0026|orf6.7878|CA5142|CaO19.12048|CaO19.4579|IPF1022	Predicted ORF in Assemblies 19, 20 and 21
orf19.2863.1	0.616626	0.0242816		IPF24509.1|IPF7312.2|Contig4-2091_0003|CA1664|ERV1.3f|ERV1.3	ORF Predicted by Annotation Working Group
orf19.1621	0.614984	0.0243236	GPA2	orf19.9189|IPF25624.1|IPF4239.2|Contig4-2798_0009|orf6.6451|CA4012|CAG99|CaO19.9189|CaO19.1621	G-protein alpha subunit; regulates filamentous growth; reports differ on a role in cAMP-mediated glucose signaling, cAMP-PKA pathway, MAP kinase cascade; Gpr1p C terminus binds Gpa2p; regulates HWP1 and ECE1
orf19.3872	0.614758	0.0186435		orf19.11353|IPF23403.1|IPF12179.1|Contig4-1785_0002|orf6.5843|CA3548|CaO19.3872|IPF12179	Predicted ORF in Assemblies 19, 20 and 21
orf19.933	0.61388	0.0133067		orf19.8548|IPF6529.2|IPF26349.1|IPF29623.1|Contig4-2870_0001|orf6.8182|orf6.1318|CA0417|orf19.2225|UBC13|CaO19.933|CaO19.8548	Predicted ORF in Assemblies 19, 20 and 21; merged with orf19.2225 in Assembly 21
orf19.7043	0.613839	0.00991107		IPF3081.1|Contig4-2855_0014|orf6.7969|CA5224|CaJ7.0089|CaO19_7043|CaJ7_0089|CaO19.7043|IPF3081	Predicted ORF in Assemblies 19, 20 and 21
orf19.7456	0.612867	0.0486173		IPF2903.1|Contig4-3064_0008|orf6.8616|CA5747|CaO19.7456|IPF2903	Predicted ORF in Assemblies 19, 20 and 21
orf19.2710	0.612755	0.0394911		orf19.10225|IPF24631.1|IPF16212.2|Contig4-1957_0003|Contig4-2190_0003|orf6.2726|CA1290|CaO19.10225|GLC8|CaO19.2710|IPF16212	Predicted ORF in Assemblies 19, 20 and 21
orf19.5619	0.612723	0.00179268		orf19.13064|IPF12435.2|IPF19389.2|Contig4-2504_0006|orf6.213|orf6.4778|CA2755|LPF39|CaO19.5619|IFA12	Predicted ORF in Assemblies 19, 20 and 21; transcription is induced in response to alpha pheromone in SpiderM medium
orf19.807	0.612721	0.0283801	CHS5	orf19.8426|IPF19407.2|IPF5058.1|Contig4-2544_0010|orf6.173|orf6.2544|CA1176|CaO19.807|CA4208|CHS5.5eoc|IPF18240.1	Putative chitin biosynthesis protein; fungal-specific (no human or murine homolog); transcription decreases upon yeast-to-hyphal switch
orf19.6249	0.609243	0.00238155	HAK1	orf19.13627|IPF20886.1|IPF9136.3|Contig4-2748_0001|Contig4-2748_0010|orf6.1565|orf6.2201|CA0966|IPF9136|IPF9136.5eoc|IPF9136.2	Putative potassium transporter; similar to Schwanniomyces occidentalis Hak1p; amphotericin B induced; transcriptionally induced upon phagocytosis by macrophage
orf19.1760	0.608891	0.0338627	RAS1	orf19.9329|IPF25567.1|IPF6849.2|Contig4-1964_0005|orf6.4089|CA2261|CaO19.9329|CaO19.1760	RAS signal transduction GTPase; regulates cAMP and MAP kinase pathways; role in hyphal induction, virulence, apoptosis, heat-shock sensitivity; nonessential; glutamine-rich C terminus; complements viability of S. cerevisiae ras1 ras2 mutant
orf19.2863	0.608283	0.010754		orf19.10381|IPF19166.2|IPF7313.2|Contig4-2091_0004|orf6.3267|orf6.734|CaO19.2863	Predicted ORF in Assemblies 19, 20 and 21; possibly spurious ORF (Annotation Working Group prediction)
orf19.2452	0.606583	0.0315554		orf19.9988|orf6.1246|IPF14850.2|IPF14849.3|Contig4-2200_0007|Contig4-2200_0010|orf6.294|CA0046|CaO19.2452|IPF14850	Transcriptionally regulated by iron; expression greater in high iron; downregulated in core caspofungin response; ketoconazole-repressed; shows colony morphology-related gene regulation by Ssn6p; possibly subject to Kex2p processing
orf19.5058	0.606257	0.00301461	SMI1	orf19.12525|IPF22129.1|IPF12215.2|Contig4-2407_0002|Contig4-2407_0003|orf6.3378|CA1740|CaO19.5058	Decreased mRNA abundance observed in cyr1 homozygous null mutant hyphal cells; caspofungin repressed
orf19.4993	0.60304	0.0182256	SEC18	orf19.12460|orf19.12461|IPF22276.1|IPF22225.1|IPF22267.1|IPF1784.2|IPF1785.2|IPF1786.2|Contig4-3025_0011|Contig4-3025_0012|Contig4-3025_0013|orf6.8016|orf6.8015|CA5270|CA5268|orf19.4994|SEC18.5f	Functional homolog of S. cerevisiae Sec18p, which acts in protein transport; conserved ATP binding site; not glycosylated
orf19.6990	0.602741	0.00307808		IPF4530.1|Contig4-2640_0003|orf6.7736|CA5036|CaO19.6990|CPR52|CYP52	Predicted ORF in Assemblies 19, 20 and 21
orf19.1301	0.602274	0.00776405		orf19.8881|IPF13554.1|IPF18704.2|Contig4-2781_0016|orf6.1386|CA0452|CaO19.1301|IPF13554	Predicted ORF in Assemblies 19, 20 and 21
orf19.321	0.600601	0.00296311		orf19.7953|IPF6757.1|IPF29879.1|Contig4-2797_0003|Contig4-2797_0004|orf6.5637|CA3387|MUP3|CaO19.7953|CaO19.321	Predicted ORF in Assemblies 19, 20 and 21
orf19.6630	0.597561	0.0160592		IPF2532.2|IPF27678.1|Contig4-2856_0002|Contig4-2856_0003|orf6.1187|orf6.6527|CA0356|CaO19.6630|IPF2532	ORF Predicted by Annotation Working Group
orf19.1149	0.595822	0.000277401	MRF1	orf19.8742|IPF11717.2|IPF14722.3|Contig4-2773_0007|orf6.100|orf6.2782|CA1333|ETR2|CaO19.1149	Protein similar to mitochondrial respiratory proteins; increased transcription observed upon benomyl treatment; induced by farnesol, nitric oxide, core stress response; oxidative stress-induced via Cap1p
orf19.223	0.594626	0.049082		orf19.7854|IPF19261.2|IPF13825.2|Contig4-2835_0022|orf6.276|orf6.278|orf6.476|orf6.5150|CA3029|CaO19.223|IPF13825	Predicted ORF in Assemblies 19, 20 and 21; increased expression in response to prostaglandins
orf19.2769	0.593544	0.000590667		orf19.10285|IPF24643.1|IPF7079.2|Contig4-2112_0005|Contig4-2513_0011|orf6.6583|CA4122|CaO19.10285|CaO19.2769|PBI2	Predicted ORF in Assemblies 19, 20 and 21; hyphal-induced expression; greater mRNA abundance observed in a cyr1 or ras1 homozygous null mutant than in wild type
orf19.744	0.592093	0.0425375	GDB1	orf19.8363|IPF26560.1|IPF9743.2|IPF9740|orf6.4133|CA2291|CaO19.744|CaO19.8363	Putative glycogen debranching enzyme; expression is regulated upon white-opaque switching; regulated by Nrg1p, Tup1p
orf19.4540	0.590001	0.0270963	UBC8	orf19.12015|IPF22726.1|IPF8054.2|Contig4-2727_0007|orf6.6686|CA4199|CaO19.12015|CaO19.4540	Protein similar to S. cerevisiae Ubc8p; transcription is induced in response to alpha pheromone in SpiderM medium
orf19.242.2	0.588975	0.0105366		IPF10503.2|CA1267|YSY6	ORF Predicted by Annotation Working Group
orf19.5030	0.583502	0.0436976		orf19.12497|IPF18123.2|IPF3014.1|Contig4-3075_0032|orf6.7979|CA5234|CaO19.5030|CaO19.12497|IPF3014	Predicted ORF in Assemblies 19, 20 and 21; induced during planktonic growth
orf19.4726	0.579913	0.0377045		orf19.12189|IPF22479.1|IPF16484.1|orf6.3188|CA1606|FRQ1|CaO19.4726|CaO19.12189|NCS1	Predicted ORF in Assemblies 19, 20 and 21
orf19.1203.1	0.578322	0.00252611		IPF26149.1|IPF12464.1|Contig4-3055_0003|orf6.2151|CA1433|IPF12464	ORF Predicted by Annotation Working Group
orf19.84	0.577116	0.00568511	CAN3	orf19.11123|orf19.7729|IPF23634.1|IPF19550.1|IPF27172.1|IPF19551.1|IPF14582.1|Contig4-2119_0003|orf6.115|orf6.2072|orf19.3641	Predicted ORF in Assemblies 19, 20 and 21; expression is regulated upon white-opaque switching
orf19.1946	0.574354	0.00237629		orf19.9501|IPF16195.1|IPF16194.2|Contig4-1970_0003|orf6.1972|orf6.5593|CA3352|CaO19.1946|IPF16194	Similar to an aldose 1-epimerase-related protein; antigenic during murine systemic infection; protein detected by mass spec in exponential and stationary phase cultures
orf19.5379	0.572965	0.00715064	ERG4	orf19.12834|IPF21722.1|IPF8225.1|Contig4-2974_0009|orf6.4141|CA2297|CaO19.5379|CaO19.12834	Protein described as similar to sterol C-24 reductase; shows Mob2p-dependent hyphal regulation; fluconazole-induced; caspofungin repressed
orf19.7547	0.571661	0.0247446		IPF17102.2|Contig4-1679_0001|orf6.8895|CA5958|PIB1|CaO19.7547	Predicted ORF in Assemblies 19, 20 and 21
orf19.2614	0.570552	0.00281566	RSR1	orf19.10145|IPF24771.1|IPF8507.2|Contig4-2859_0002|orf6.4271|CA2385|RSR1.3	RAS-related protein; GTP/GDP cycling required for wild-type polar bud site selection, hyphal growth guidance; role in systemic virulence in mouse; geranylgeranylation predicted; suppresses S. cerevisiae cdc24-4 mutant heat sensitivity
orf19.2613	0.56891	0.000909144	ECM4	orf19.10144|IPF24763.1|IPF8505.2|Contig4-2859_0005|orf6.4272|ECM41|CA2386|ECM41.3f|ECM41.3	Protein similar to S. cerevisiae Ecm4p; transcription is regulated by Nrg1p and Tup1p; induced in core stress response or in cyr1 or ras1 homozygous null mutant (yeast-form or hyphal cells); transposon mutation affects filamentous growth
orf19.4132	0.562279	0.0169772		orf19.11609|IPF23123.1|IPF14871.1|Contig4-2911_0016|orf6.2615|CA1222|CaO19.11609|CaO19.4132|SNA2|IPF14871	Predicted ORF in Assemblies 19, 20 and 21
orf19.7436.1	0.560437	0.00508249	ECM15	IPF2469.1|CA5727	ORF Predicted by Annotation Working Group; caspofungin repressed
orf19.6078	0.559585	0.0123398	POL93	IPF17652.3|Contig4-2396_0002|Contig4-2396_0003|Contig4-2960_0011|orf6.241|orf6.1756|CA0037|CaO19.6078|IPF17652.2	Predicted ORF in retrotransposon Tca8 with similarity to the Pol region of retrotransposons encoding reverse transcriptase, protease and integrase; downregulated in response to ciclopirox olamine; induced upon biofilm formation
orf19.279	0.547054	0.0240906		orf19.7911|IPF27060.1|IPF19768.1|orf6.4808|CA2779|CaO19.279|CaO19.7911|IPF3836	Predicted ORF in Assemblies 19, 20 and 21
orf19.5073	0.545972	0.00687796	DPM1	orf19.12539|IPF22152.1|IPF10089.2|Contig4-2713_0004|orf6.6303|CA3899|DPMS|CaO19.12539|CaO19.5073	Protein with similarity to S. cerevisiae Dpm1p, which is dolichol phosphate mannose synthase; filament induced; Tup1p-regulated
orf19.822	0.543606	0.00791875		orf19.8442|IPF26460.1|IPF8762.2|Contig4-2913_0002|orf6.6713|CA4220|CaO19.822|CaO19.8442|IPF8762	Protein detected in some, not all, biofilm extracts; fluconazole-downregulated; greater mRNA abundance observed in cyr1 or ras1 homozygous null mutant than in wild type; protein detected by mass spec in stationary phase cultures
orf19.2721	0.54277	0.0049589		orf19.10236|IPF6404.2|IPF29006.1|Contig4-1801_0005|Contig4-2673_0012|orf6.2698|orf6.676|CA0150|CaO19.2721|CDC123	Predicted ORF in Assemblies 19, 20 and 21
orf19.4952.1	0.541257	0.000508477		IPF22326.1|IPF13976.2|Contig4-2314_0003	ORF Predicted by Annotation Working Group
orf19.4246	0.535551	0.0360988		orf19.11721|IPF22957.1|IPF6881.2|Contig4-2928_0003|orf6.3978|orf6.6599|YKR070W|CA2186|CaO19.4246|IPF6881	Predicted ORF in Assemblies 19, 20 and 21; similar to S. cerevisiae Ykr070wp; transposon mutation affects filamentous growth; Hog1p-downregulated; shows colony morphology-related gene regulation by Ssn6p; induced during cell wall regeneration
orf19.1206	0.530654	0.00915949	FET35	orf19.8797|orf6.2939|IPF26138.1|IPF12467.2|FET34.3eoc|CA1431|CaO19.8797|CaO19.1206	Protein with similarity to multicopper ferroxidase; transcriptionally activated in low iron conditions; transcription is repressed by Sfu1p and activated under weak acid stress by Mnl1p; merged with orf19.4215 in Assembly 20
orf19.633	0.529981	0.0182384		IPF26671.1|IPF11379.2|IPF19271.1|Contig4-2129_0003|orf6.444|CA0081|IPF11379	Protein described as a putative methyltransferase; decreased expression in hyphae compared to yeast-form cells; expression regulated during planktonic growth
orf19.7538	0.527133	0.0132942		IPF336.1|Contig4-3048_0007|orf6.8790|CA5871|PIF1|CaO19.7538|PIF2	Predicted ORF in Assemblies 19, 20 and 21
orf19.3910	0.526368	0.0376386		orf19.11391|IPF23262.1|IPF15494.2|Contig4-2817_0009|orf6.5138|CA3019|CaO19.3910|RNY12|CaO19.11391|IPF15494	Predicted ORF in Assemblies 19, 20 and 21
orf19.2248	0.52413	0.0095252	ARE2	orf19.9788|IPF10109.2|IPF10110.1|Contig4-2290_0009|orf6.5898|CA3590|CaO19.9788|CaO19.2248	Acyl CoA:sterol acyltransferase (ASAT); uses cholesterol and oleoyl-CoA substrates; protoberberine derivative drug inhibits enzyme activity; 7 putative transmembrane regions; ketoconazole-induced
orf19.3641	0.523167	0.0134612		orf19.11123|IPF23634.1|IPF19550.1|IPF14582.1|Contig4-2119_0003|orf6.2072|CAN3|CA0884|CAN5|CA0016|CAN5.5	Expression is regulated upon white-opaque switching; merged with orf19.84 in Assembly 20
orf19.5417	0.522637	0.0191747	DOT5	orf19.12872|IPF21747.1|IPF1111.1|Contig4-2864_0008|orf6.8653|CA5773|CaO19.5417|CaO19.12872	Alkaline downregulated
orf19.2693	0.521045	0.0402528	GST2	orf19.10208|YNL229C|Contig4-2782_0006|IPF24629.1|IPF7968.2|IPF7968|Contig4-2865_0012|orf6.5481|CA3260|CaO19.10208|CaO19.2693	Increased transcription is observed upon benomyl treatment transcription and in populations of cells exposed to fluconazole over multiple generations; regulated by Nrg1p, Tup1p; induced by nitric oxide
orf19.1723	0.520534	0.00845463		orf19.9291|IPF25651.1|IPF8407.1|Contig4-2981_0015|orf6.4837|CA2795|CaO19.9291|CaO19.1723|IPF8407	Predicted ORF in Assemblies 19, 20 and 21
orf19.5372	0.519954	0.0321006		IPF6235.2|Contig4-2964_0004|orf6.4026|CA2216|CaJ7.0303|CaO19.5372|GAG4|IPF6235	Predicted ORF from Assembly 19; orf19.5372 and orf19.5373 are similar to the Tca2 (pCal) retrotransposon, which is present in strain hOG1042 as 50 to 100 copies of a linear dsDNA; removed from Assembly 20; transcription is Tbf1p-activated
orf19.2371	0.519212	0.0134659		orf19.9907|IPF24948.1|IPF29129.1|Contig4-2369_0001|orf6.4769|GAG1|CaO19.9907|CaO19.2371	Putative Gag protein of retrotransposon Tca2; separated by a stop codon from Pol protein orf19.2372; both likely translated as single polyprotein that includes nucleocapsid-like protein (Gag), reverse transcriptase, protease, and integrase
orf19.1564	0.5144	0.00295589		orf19.9137|IPF25819.1|IPF7145.2|Contig4-2824_0002|orf6.6421|CA3988|CaO19.9137|CaO19.1564|IPF7145	Predicted ORF in Assemblies 19, 20 and 21
orf19.1756	0.510092	0.00056243	GPD1	orf19.9325|IPF25561.1|IPF6860.1|Contig4-2851_0007|orf6.4093|CA2263|CaO19.1756|CaO19.9325	Protein similar to S. cerevisiae glycerol-3-phosphate dehydrogenase (enzyme of glycerol biosynthesis); biofilm-induced expression; regulated by Efg1p; regulated by Tsa1p, Tsa1Bp under H2O2 stress conditions
orf19.2047	0.509308	0.00365269		orf19.9595|IPF25302.1|IPF7456.1|Contig4-3065_0024|orf6.5986|CA3656|CaO19.9595|CaO19.2047|IPF7456	Predicted ORF in Assemblies 19, 20 and 21; mutation confers hypersensitivity to toxic ergosterol analog, and to amphotericin B
orf19.4776	0.505154	0.00236269		orf19.12240|IPF11774.2|IPF9416.3|Contig4-2888_0010|orf6.1106|orf6.3987|orf6.1105|CA6215|CaO19.4776|IPF9416	Putative transcription factor with zinc cluster DNA-binding motif; has similarity to S. cerevisiae Lys14p, which is a transcription factor involved in the regulation of lysine biosynthesis genes
orf19.2172	0.503112	0.0223093	ARA1	orf19.9718|IPF25141.1|IPF10148.2|Contig4-3057_0027|orf6.6091|CA3746|CaO19.9718|CaO19.2172	D-Arabinose dehydrogenase; in dehydro-D-arabinono-1,4-lactone biosynthesis; NADP+ cofactor; active toward D-arabinose, L-fucose, L-xylose, L-galactose; inhibited by metal ions, thiol group-specific reagents; induced on polystyrene adherence
orf19.682	0.501677	0.0458409		orf19.8300|IPF7715.3|IPF29744.1|Contig4-2776_0014|orf6.1793|orf6.3697|CA0706|CaO19.682|IPF7715.3eoc|IPF7715|IPF7715.2	Predicted ORF from Assembly 19; ketoconazole-induced; fluconazole-downregulated; induced in a cyr1 homozygous null mutant; shows colony morphology-related gene regulation by Ssn6p; merged with orf19.2296 in Assembly 20
orf19.4041	0.500511	0.00593004	PEX4	orf19.11524|IPF8784.1|IPF7214.1|Contig4-3094_0004|orf6.4408|orf6.7454|CA4803|CaO19.4041	Predicted ORF in Assemblies 19, 20 and 21; transcription is upregulated in both intermediate and mature biofilms
orf19.410.3	0.49875	0.0483103		IPF26888.1|IPF4908.2|Contig4-3004_0003|CA0054|RIB4|RIB4.3	Lumazine synthase (6,7-dimethyl-8-ribityllumazine synthase, DMRL synthase); catalyzes the penultimate step in the synthesis of riboflavin
orf19.2989	0.490765	4.95417e-05		orf19.10506|IPF15924.2|IPF16795.1|Contig4-2184_0001|orf6.1981|orf6.5700|CA0821|CaO19.2989|IPF16795	Predicted ORF in Assemblies 19, 20 and 21
orf19.767	0.486317	0.0155569	ERG3	orf19.8387|IPF16592.2|IPF3890.1|Contig4-1987_0003|orf6.3667|orf6.696|CA1956|CaO19.8387|CaO19.767	C-5 sterol desaturase; introduces C-5(6) double bond into episterol in ergosterol biosynthesis; clinically-isolated homozygous null mutants show azole resistance, defects in hyphal growth and virulence; Efg1p-repressed; fluconazole-induced
orf19.6396	0.483104	0.0381234		orf19.13754|orf6.7858|IPF20776.1|IPF5124.1|CA5131|IPF5124|CaO19.6396|CaO19.13754	Putative patatin-like phospholipase; similar to S. cerevisiae Yml059p, which is predicted to be a membrane protein: antigenic during human oral infection
orf19.4907	0.477648	0.00395135		orf19.12373|IPF22400.1|IPF17283.2|Contig4-2762_0012|orf6.3754|CA2021|CaO19.12373|CaO19.4907|IPF17283	Predicted ORF in Assemblies 19, 20 and 21; increased transcription is observed upon fluphenazine treatment; possibly transcriptionally regulated by Tac1p; induced by nitric oxide; fungal-specific (no human or murine homolog)
orf19.4109	0.475195	0.00456472	PMT4	orf19.11590|IPF23133.1|IPF2115.1|Contig4-2950_0002|orf6.6827|CA4314|CaO19.4109|CaO19.11590	Protein mannosyltransferase required for normal cell wall composition and full virulence in mouse systemic infection; has roles in hyphal growth and drug sensitivity; one of 5 PMT family members; Axl2p is a substrate
orf19.7381	0.474712	0.0110309		IPF1292|IPF1292.1|Contig4-3093_0048|orf6.8541|CA5678|CaO19.7381	Predicted zinc-finger protein of unknown function; not essential for viability
orf19.1799	0.469525	0.00973034		orf19.9365|IPF19643.2|IPF19644.1|Contig4-3019_0033|orf6.2231|orf6.4378|GAP6|CA0981|GAP12|CaO19.1799|GAP4	Putative general amino acid permease; fungal-specific (no human or murine homolog)
orf19.6889	0.460824	0.00281405	MKK2	orf19.14178|IPF9424.3|IPF14309.2|Contig4-2509_0011|orf6.121|orf6.7153|CA4577|CaO19.6889	Protein not essential for viability; similar to S. cerevisiae Mkk2p, which is a MAP kinase kinase involved in signal transduction; macrophage-downregulated gene
orf19.5602	0.460011	0.0339852	BMT6	orf19.13045|IPF21591.1|IPF19772.1|Contig4-2108_0003|orf6.5070|CA2969|WRY2|CaO19.5602|IPF19772	Putative beta-mannosyltransferase, member of a 9-gene family that includes characterized genes BMT1, BMT2, BMT3, and BMT4 with roles in beta-1,2-mannosylation of cell wall phosphopeptidomannan; predicted ORF in Assemblies 19, 20 and 21
orf19.6194	0.458197	0.0394578		orf19.13574|IPF10001|IPF20922.1|IPF10001.2|Contig4-1805_0002|orf6.5430|CA3220|CaO19.13574|CaO19.6194	Protein not essential for viability; possibly spurious ORF (Annotation Working Group prediction)
orf19.7531	0.456684	0.0363139		IPF351.1|IPF351|Contig4-3048_0002|orf6.8783|YMR90|CA5868|CaO19.7531	Predicted ORF in Assemblies 19, 20 and 21; transcription is induced upon yeast-hyphal transition; benomyl or caspofungin induced; protein detected by mass spec in stationary phase cultures
orf19.6139	0.454254	0.0351093	FRE7	orf19.13558|IPF20984.1|IPF17763.2|FRE3|CFL1|CFL93|orf6.5675|CA3416|FRE30.3|FRE30.3f	Protein similar to ferric reductase Fre10p; transcription is downregulated in response to treatment with ciclopirox olamine or 17-beta-estradiol; transcriptionally induced by alkaline conditions or interaction with macrophage
orf19.1964	0.449178	0.000476327		orf19.9520|IPF25368.1|IPF6298.2|IPF6298|Contig4-2813_0008|orf6.5040|CA2947|AQR1|CaO19.1964|CaO19.9520	Putative protein of unknown function; downregulated upon fluphenazine treatment; upregulated upon benomyl treatment and in an RHE model; regulated by Nrg1p, Tup1p
orf19.7297	0.436155	0.037269		IPF2837.2|Contig4-2774_0001|Contig4-2774_0012|orf6.8378|CA5536|CaO19.7297|IPF2837	Predicted ORF in Assemblies 19, 20 and 21; Hog1p-induced; Gcn4p-regulated; protein level decreased in stationary phase cultures
orf19.4527	0.42071	0.000776347	HGT1	orf19.12002|HGT11|IPF7518.2|IPF9983.2|Contig4-2702_0004|orf6.3044|orf6.6673|CA1506|CaO19.4527	High-affinity glucose transporter, member of major facilitator superfamily; transcription induced by progesterone and by drugs including chloramphenicol and benomyl; likely essential for growth, based on an insertional mutagenesis strategy
orf19.2531	0.41952	0.0145009	CSP37	orf19.10066|orf6.2388|IPF24765.1|IPF4991.2|Contig4-2933_0007|CA1075|CaO19.10066|CaO19.2531|IPF4991	Plasma membrane, hyphal cell wall protein; role in progression of murine systemic infection; predicted P-loop, divalent cation binding, N-glycosylation sites; expressed in yeast and hyphae; hyphal downregulated; lacks S. cerevisiae homolog
orf19.1999	0.41933	0.00789365		orf19.9550|IPF18279.2|IPF4751.2|Contig4-2876_0002|orf6.6361|CA3943|CaO19.9550|CaO19.1999|IPF4751	Predicted ORF in Assemblies 19, 20 and 21
orf19.4869	0.395149	0.0189897	SFU1	orf19.12333|orf6.2584|IPF22421.1|IPF19906.1|Contig4-2622_0003|Contig4-2622_0004|CA1201|CaO19.12333|CaO19.4869|IPF19906	Transcriptional regulator of iron-responsive genes; represses some iron utilization genes when iron is present; not required for wild-type hyphal growth; has two GATA1-like zinc fingers separated by Cys-rich iron-sensing region
orf19.1654	0.386038	0.0111499		orf19.9223|IPF25652.1|IPF20085.1|Contig4-2710_0007|orf6.3139|CaO19.1654|CaO19.9223	Predicted ORF in Assemblies 19, 20 and 21; increased expression in response to prostaglandins
orf19.3475	0.383779	0.0247751		orf19.10979|IPF11725|IPF11725.2|IPF12058.2|Contig4-2835_0016|orf6.432|orf6.4984|CA2903|CaO19.3475	Described as a Gag-related protein; hyphal induced; downregulation correlates with clinical development of fluconazole resistance; repressed by nitric oxide, 17-beta-estradiol, ethynyl estradiol
orf19.3646	0.377399	0.00213879	CTR1	orf19.11130|orf6.3031|IPF23640.1|IPF9685.1|Contig4-3041_0013|CA1496|CaO19.11130|CaO19.3646	Copper transporter; probably multimeric; transcribed if copper limited; induced by Mac1p, macrophage interaction, alkaline pH via Rim101p; 17-beta-estradiol downregulated; complements S. cerevisiae ctr1 ctr3 copper transport mutant
orf19.4747	0.376866	0.0133496	HEM14	orf19.12209|orf6.4017|orf6.3659|IPF19663.1|IPF19662.1|CA1951|CaO19.4747	Putative protoporphyrinogen oxidase involved in heme biosynthesis; predicted Kex2p substrate; transcription is regulated by iron; mRNA levels are decreased in a yfh1 null mutant
orf19.3822	0.36112	0.034946	SCS7	orf19.11303|orf6.7517|IPF23462.1|IPF5819.1|Contig4-2989_0014|CA4852|CaO19.3822|CaO19.11303	Protein described as ceramide hydroxylase; transcription is regulated by Nrg1p; transcriptionally regulated by iron; expression greater in high iron; fluconazole-induced
orf19.3392	0.348433	0.0359761	DOG1	orf19.10895|IPF23846.1|IPF9474.2|DOG2|Contig4-1966_0001|Contig4-2516_0009|orf6.1809|CA0716|CaO19.3392|CaO19.10895	Putative 2-deoxyglucose-6-phosphatase; haloacid dehalogenase hydrolase/phosphatase superfamily; similar to S. cerevisiae Dog1p, Dog2p, Hor1p, and Rhr2p; regulated by Nrg1p, Tup1p
orf19.1862	0.331977	0.0192334		orf19.9418|IPF4065|orf6.1262|IPF18208.2|IPF4065.1|Contig4-2502_0004|CA0386|CaO19.1862	Possible stress protein; increased transcription is associated with CDR1 and CDR2 overexpression or fluphenazine treatment; transcription regulated by Sfu1p, Nrg1p, Tup1p
orf19.2170	0.298901	0.0122041	PHM7	orf19.9716|IPF25099.1|IPF10153.2|Contig4-3057_0029|orf6.6093|CA3747|CaO19.2170|IPF10153	Putative transporter; fungal-specific (no human or murine homolog); Hog1p-downregulated; downregulated in response to 17-beta-estradiol, ethynyl estradiol
orf19.4033	0.294827	0.0346382	PRP22	orf19.11516|IPF23374.1|IPF8801.2|Contig4-3094_0013|orf6.7446|CA4797|CaO19.4033|CaO19.11516	Protein described as an RNA-dependent ATPase; induced upon adherence to polystyrene; transcriptionally activated by Mnl1p under weak acid stress
orf19.79	0.286578	0.0135091		Contig4-2848_0007	Predicted ORF from Assembly 19; removed from Assembly 20
orf19.2762	0.258091	0.0473176	AHP1	orf19.10278|orf6.6590|IPF24637.1|IPF6629.2|IPF6629|Contig4-2938_0023|CA4127|AHP11|CaO19.2762|CaO19.10278	Putative alkyl hydroperoxide reductase; immunogenic in mouse; biofilm-induced; fluconazole-induced; amphotericin B, caspofungin, alkaline downregulated; induced in core stress response; regulated by Ssk1p, Nrg1p, Tup1p, Ssn6p, Hog1p
orf19.2431	0.247131	0.000332946		orf19.9967|IPF24888.1|IPF29100.1|orf6.1394|CaO19.2431|CaO19.9967	Predicted ORF in Assemblies 19, 20 and 21; transcription is induced in response to alpha pheromone in SpiderM medium
orf19.2048	0.244899	0.039098		orf19.9596|orf6.5987|IPF25325.1|IPF7458.1|Contig4-3065_0023|CaO19.2048|CaO19.9596	Transcription is positively regulated by Sfu1p
orf19.1097	0.24474	0.0152354	ALS2	orf19.8699|orf19.8700|orf19.9669|orf19.9670|orf6.1311|ALS4|IPF26222.1|IPF26230.1|IPF15450.3|IPF10205.2|IPF25194.1|IPF25217.1|IPF18994.1|IPF16055.3|orf6.3000|orf6.2999|CA1473|CA1471|CA0412|CA0413|orf19.1098|orf19.2121|orf19.2122|ALS12|ALS2.5f	ALS family protein; role in adhesion, biofilm formation, germ tube induction; expressed at infection of human buccal epithelial cells; putative GPI-anchor; induced by ketoconazole, low iron and at cell wall regeneration; regulated by Sfu1p
orf19.4555	0.237563	0.0188701	ALS4	IPF13009.2|IPF13010.2|IPF22626.1|IPF18130.1|ALS4.3f|Contig4-2046_0006|Contig4-2931_0006|orf6.3075|CA1527|CA1528|CA5173|orf19.4556|orf19.4610.1|ALS4.5f	ALS family protein; role in adhesion and wild-type germ tube induction; growth and temperature regulated; expressed during infection of human buccal epithelial cells; down-regulated upon vaginal contact; putative GPI-anchored
orf19.2355	0.236108	0.0263537	ALS10	orf19.9891|IPF24952.1|IPF12997.2|orf6.2760|ALS2|CA0448|ALS3|CaO19.2355|orf6.1377	ALS family protein; ALS family includes cell-surface glycoproteins, some with adhesin function; putative GPI-anchor; filament induced; regulated by Nrg1p, Rfg1p, Tup1p; merged with orf19.1816 in Assembly 20
orf19.7350	0.201019	0.0138604		IPF7109.2|Contig4-2885_0005|orf6.8510|CA5650|CaO19.7350|IPF7109	Soluble protein in hyphae; fluconazole-induced; mRNA abundance is elevated in a cyr1 or ras1 null mutant and decreased mRNA abundance in an efg1 null mutant; regulated by Nrg1p, Tup1p, Tbf1p, Ssn6p
orf19.3746	0.175307	0.00102985	IFC1	orf19.11233|IPF23519.1|IPF4732.2|IPF4737.2|OPT2|Contig4-2422_0002|orf6.5478|CA3257|CA3258|CaO19.11231|OPT22|CaO19.3746|IFC2|orf6.5476	Oligopeptide transporter; transcriptionally induced upon phagocytosis by macrophage; macrophage/pseudohyphal-repressed after 16h; fluconazole-induced; virulence-group-correlated expression; fungal-specific (no human or murine homolog)
orf19.4215	0.136548	0.020807	FET34	orf19.11691|orf19.8797|orf6.5006|orf6.2939|IPF26138.1|IPF12467.2|IPF23068.1|IPF17039.1|FET5|FET34.3eoc|CA1431|CA2920|orf19.1206|FET35|FET5.5eoc	Protein similar to multicopper ferroxidase; expression greater in low iron and reduced in a fluconazole-resistant isolate; downregulated by Sfu1p, Hog1p; alkaline upregulated by Rim101p; ciclopirox olamine induced
orf19.5620	0.11687	0.0140587		orf19.13065|IPF18418.1|IPF12436.3|Contig4-2504_0003|orf6.212|orf6.4779|CA2756|PHZ1|CaO19.5620|IPF18418	Predicted ORF in Assemblies 19, 20 and 21; regulated by Gcn4p; induced in response to amino acid starvation (3-aminotriazole treatment); increased transcription is observed upon benomyl treatment or in an azole-resistant strain that overexpresses MDR1
orf19.3384	0.0913604	0.00693857		orf19.10892|IPF23893.1|IPF16136.1|Contig4-2768_0006|orf6.2929|RBT1|CaO19.10892|HWP98|CaO19.3384	Putative cell wall protein with C-terminal similarity to Hwp1p; alkaline upregulated; alpha factor induced; Rim101p-regulated; merged with orf19.1327 in Assembly 20
orf19.1321	0.0877135	0.0051433	HWP1	orf19.8901|ECE2|IPF26012.1|IPF12916.1|Contig4-2436_0002|orf6.4883|CA2825|CaO19.8901|CaO19.1321	Hyphal cell wall protein; covalently crosslinked to epithelial cells by host transglutaminase; opaque- and a-specific, alpha-factor induced; at MTLa side of conjugation tube; assessment of virulence role complicated by URA3 effects
orf19.85	0.0789332	0.0121892	GPX2	orf19.7730|orf6.1558|GPX1|IPF16333.2|IPF13205.1|GPX3|Contig4-2178_0002|CA0558|GPS1|CaO19.85|CaO19.7730	Similar to glutathione peroxidase; expression greater in high iron; alkaline upregulated by Rim101p; transcriptionally induced by alpha factor or interaction with macrophage; regulated by Efg1p; caspofungin repressed
orf19.5760	0.0616115	0.0257852	IHD1	orf19.13183|PGA36|IPF21466.1|IPF10662.2|Contig4-2056_0002|orf6.6198|orf6.6197|YMR317|CA3827|orf19.5761|CaO19.13183|CaO19.5760|IPF10662	Putative GPI-anchored protein of unknown function; alkaline upregulated; greater transcription in hyphal form than yeast form; regulated by Nrg1p, Rfg1p, Tup1p; regulated by Tsa1p, Tsa1Bp in minimal media at 37; not essential for viability
orf19.3374	0.0456987	0.0124817	ECE1	orf19.10882|IPF23894.1|IPF14152.1|Contig4-2242_0004|orf6.2886|CA1402|CaO19.10882|CaO19.3374	Protein comprising eight 34-residue repeats; hyphal-specific expression increases with extent of elongation of the cell; regulated by Rfg1p, Nrg1p, Tup1p, Cph1p, Efg1p, Hog1p, farnesol, phagocytosis; may contribute to biofilm formation
orf19.1816	0.0382351	0.00203909	ALS3	orf19.9891|orf19.9379|ALS8|IPF25511.1|IPF12561.3|IPF24952.1|IPF12997.2|orf6.2760|ALS2|ALS3-1|CA0591|CA0448|orf19.2355|ALS10|ALS3.5eoc|orf6.1614|IPF12561.2	Adhesin; ALS family; role in epithelial adhesion, endothelial invasiveness; allelic variation in adhesiveness; immunoprotective in mice; predicted GPI-anchor cell wall protein; macrophage, hyphal induced, pH, Nrg1p, Rfg1p, Tup1p regulated
orf19.5741	0.0354886	0.00139844	ALS1	orf19.13163|IPF21498.1|IPF13002.2|Contig4-2848_0008|orf6.1115|CA0316|CaO19.5741|ALS1.3eoc|IPF13002.1	Adhesin; ALS family of cell-surface glycoproteins; adhesion, virulence roles; immunoprotective; in band at hyphal base; amyloid domain; biofilm-induced; Rfg1p, Ssk1p, growth-regulated; strain background affects expression
orf19.1327	0.0315063	0.0276673	RBT1	orf19.8907|orf19.10892|ECE99|IPF19252.2|IPF15385.2|IPF23893.1|IPF16136.1|Contig4-2768_0006|orf6.4889|orf6.489|orf6.2929|CA2830|orf19.3384|CaO19.1327|RBT99	Putative cell wall protein with similarity to Hwp1p, required for virulence; predicted to be cell-wall attached and glycosylated; Tup1p repressed; serum, hyphal and alkaline induced; farnesol, alpha factor induced; Rfg1p-, Rim101p-regulated

## Sheet: flo8_3h37C
Experiment	flo8 mutant hyphae 3h 37C
Time	3h 37C
Systematic	Normalized	t-test P-value	Common	Synonyms	Description
orf19.4211	9.13952	0.0179547	FET3	orf19.11687|FET33|IPF11908.2|IPF19406.2|Contig4-2671_0009|Contig4-2671_0010|orf6.176|orf6.5010|CA2924|CaO19.4211|FET31|CaO19.11687	Multicopper oxidase; required for growth under low-iron conditions; null mutant shows decreased prostaglandin E2 production; functional homolog of S. cerevisiae Fet3p; ketoconazole, caspofungin, amphotericin B repressed
orf19.5305	5.84098	0.00180551	RHD3	orf19.12765|orf6.8294|PGA29|IPF21875.1|IPF8527.1|Contig4-2961_0009|CA5476|LDG7|CaO19.12765|CaO19.5305|IPF8527	Putative GPI-anchored protein that localizes to the cell wall; transcription is decreased upon yeast-hyphal switch; transcriptionally regulated by iron; expression greater in high iron; clade-associated gene expression
orf19.54	5.60505	0.024257	RHD1	orf19.7715|IPF27198.1|IPF13148.2|Contig4-2469_0001|orf6.4552|CA2597|BMT2|WRY7|CaO19.7715|CaO19.54|IFQ3	Putative beta-mannosyltransferase, required for the addition of beta-mannose to the acid-labile fraction of cell wall phosphopeptidomannan; member of a 9-gene family; transcriptionally regulated on yeast-hyphal and white-opaque switches
orf19.889	3.94033	0.0499235	THI20	orf19.8508|IPF26412.1|IPF3679.2|Contig4-3099_0003|orf6.7288|CA4681|CaO19.8508|CaO19.889|IPF3679	Putative phosphomethylpyrimidine kinase; also described as a putative transcription factor with TENA DNA-binding motif; fungal-specific (no human or murine homolog)
orf19.2475	3.92646	3.17436e-05	PGA26	orf19.10012|orf6.4960|IPF24884.1|IPF7204.2|Contig4-2954_0019|CA2885|CaO19.10012|CaO19.2475|IPF7204	Putative GPI-anchored protein of unknown function; transcriptionally regulated by iron; expression greater in high iron; induced during cell wall regeneration; possibly spurious ORF (Annotation Working Group prediction)
orf19.4688	3.60536	0.0216109	DAG7	orf19.12157|IPF14119.1|IPF28307.1|Contig4-2733_0007|orf6.1768|CA0689|CaO19.4688|CaO19.12157|IPF14119	Predicted ORF in Assemblies 19, 20 and 21; mutation confers hypersensitivity to toxic ergosterol analog; a-specific transcription; alpha-factor induced
orf19.3895	3.47574	0.00252552	CHT2	orf19.11376|orf6.2344|IPF19719.2|IPF15860.2|Contig4-2459_0002|CA1051|CaO19.3895	Chitinase; putative N-terminal catalytic domain, GPI anchor, O-mannosylated region, signal peptide; 3 N-glycosylation motifs; downregulated in core caspofungin response; induced in yeast-form cells; Cyr1p-, Efg1p-, pH-regulated
orf19.3897	3.0963	0.0200659		orf19.11378|IPF23260.1|IPF19897.1|Contig4-2263_0011|orf6.2342|CA1050|CaO19.11378|CaO19.3897|IPF19897	Predicted ORF in Assemblies 19, 20 and 21; decreased transcription is observed upon fluphenazine treatment or in an azole-resistant strain that overexpresses CDR1 and CDR2; transcription is repressed in response to alpha pheromone in SpiderM medium
orf19.7637	3.01748	0.00147857	YHB4	orf6.8985|YHB1|IPF599.1|YHB3|Contig4-3108_0104|CA6030|CaO19.7637|YHB2	Protein related to flavohemoglobins; not required for wild-type nitric oxide resistance; has predicted globin, FAD-binding, and NAD(P)-binding domains but lacks some conserved residues of flavohemoglobins; no mRNA detected
orf19.6656	2.72147	0.0168862	DUR3	IPF2277.1|Contig4-3038_0003|orf6.6765|CA4263|CaO19.6656|IPF2277	Putative protein of unknown function, transcription is upregulated in clinical isolates from HIV+ patients with oral candidiasis; alkaline downregulated; amphotericin B induced; shows colony morphology-related gene regulation by Ssn6p
orf19.5063	2.69777	0.00290256		orf19.12529|IPF17932.1|IPF13493.1|Contig4-1378_0002|Contig4-1944_0005|orf6.1609|orf6.468|CA0586|CaO19.5063|IPF13493	Predicted ORF in Assemblies 19, 20 and 21; ciclopirox olamine induced; regulated by Ssn6p; induced by nitric oxide in yhb1 mutant
orf19.5806	2.54594	0.000395079	ALD5	orf19.13228|YER73|IPF17030.2|IPF27910.1|Contig4-2921_0012|orf6.6640|CA4159|ALD99|CaO19.5806	Protein described as an aldehyde dehydrogenase; decreased expression in fluconazole-resistant isolate, or in hyphae; biofilm induced;fluconazole-downregulated; protein abundance is affected by URA3 expression in the CAI-4 strain background
orf19.5636	2.5347	0.00461624	RBT5	orf19.13081|orf6.4505|IPF21544.1|IPF19952.1|CA2558|CaO19.5636|CaO19.13081	GPI-anchored cell wall protein involved in hemoglobin utilization; expression is regulated by Rfg1p, Rim101p, Tbf1p, iron; repressed by Sfu1p, Hog1p, Tup1p; induced by serum, alkaline pH, ketoconazole, ciclopirox olamine
orf19.220	2.3938	0.0396727	PIR1	orf19.7851|orf6.474|PIR2|IPF15363.2|IPF19968.1|orf6.5153|CA3030|CaO19.220|IPF19968	Structural protein of cell wall; 1,3-beta-glucan-linked; O-glycosylated by Pmt1p; N-mannosylated; tandem repeats; heterozygous mutant has cell wall defects; hyphal repressed; Hog1p, fluconazole, hypoxia induced; iron, Efg1p, Plc1p regulated
orf19.7331	2.38844	9.41549e-05	FCY24	IPF1985.2|Contig4-3033_0016|Contig4-3033_0017|orf6.8412|CA5567|CaO19.7331|TPN12	Putative transporter; more similar to S. cerevisiae Tpn1p, which is a vitamin B6 transporter, than to purine-cytosine permeases; transcription is regulated by Nrg1p
orf19.2644	2.12737	0.0413592	QCR2	orf19.10167|IPF24692.1|IPF6978.2|Contig4-2912_0002|orf6.3819|CA2065|CaO19.2644|CaO19.10167	Protein described as ubiquinol-cytochrome-c reductase; antigenic in human; transcriptionally induced by interaction with macrophage; repressed by nitric oxide; in detergent-resistant membrane fraction (possible lipid raft component)
orf19.3278	2.0074	0.00848981	GSY1	orf19.10788|IPF24014.1|IPF294.1|Contig4-2791_0013|orf6.8278|CA5467|CaO19.3278|CaO19.10788	Protein described as glycogen synthase; enzyme of glycogen metabolism; transcription downregulated upon yeast-hyphal switch and regulated by Efg1p; strong oxidative stress induced; shows colony morphology-related gene regulation by Ssn6p
orf19.710	1.9977	0.0297427		orf19.8329|orf6.1730|IPF26609.1|IPF12204.2|Contig4-2984_0026|CA0664|LSC2|CaO19.710|CaO19.8329|LSC2.3eoc|LSC2.3eoc1|IPF12204.1|orf19.1857.1	Protein described as beta subunit of succinate-CoA ligase; transcription regulated by Mig1p and Tup1p; transcriptionally regulated by iron; expression greater in high iron; merged with orf19.1860 in Assembly 20
orf19.4318	1.98159	0.0368716	MIG1	orf19.11793|IPF22963.1|IPF11048.2|Contig4-2700_0004|orf6.3170|CA1593|CaO19.11793|CaO19.4318	Transcriptional repressor; regulates genes for utilization of carbon sources; Tup1p-dependent and -independent functions; upregulated in biofilm; hyphal downregulated; caspofungin repressed; functional homolog of S. cerevisiae Mig1p
orf19.2454	1.94373	0.00304785	PHO87	orf19.9990|orf6.1540|PHO98|IPF19824.2|IPF14853.2|Contig4-2200_0003|Contig4-2200_0004|Contig4-2200_0005|orf6.104|orf6.293|CA0548|CaO19.2454|CA0015|PHO87.5eoc|IPF19824.1	Protein similar to phosphate permeases; transcription is negatively regulated by Rim101p at pH 8; expression is regulated upon white-opaque switching; caspofungin repressed; biofilm-regulated; virulence-group-correlated expression
orf19.3223	1.90073	0.0427838	ATP3	orf19.10734|IPF163.2|IPF18904.2|ATP3.3|Contig4-3001_0004|Contig4-3001_0005|orf6.3023|orf6.1763|CA1489|CA6208|orf19.3224|ATP3.3f	Predicted ORF in Assemblies 19, 20 and 21; flucytosine induced; caspofungin repressed; macrophage/pseudohyphal-induced
orf19.4602	1.89474	0.0257328	MDH1-1	orf19.12072|IPF22614.1|IPF6025.2|Contig4-2931_0017|orf6.7901|CA5164|MDH1|CaO19.4602|CaO19.12072	Predicted malate dehydrogenase; macrophage-induced protein
orf19.3358	1.89075	0.0323396	LSC1	orf19.10866|orf6.1927|IPF23941.1|IPF14191.1|Contig4-2755_0006|CA0791|CaO19.10866|CaO19.3358	Protein described as succinate-CoA ligase subunit; transcriptionally regulated by iron; expression greater in high iron; fluconazole-induced
orf19.1392	1.83834	0.026254		orf19.8970|IPF25932.1|IPF11068.1|Contig4-2636_0008|orf6.2244|CA0990|CaO19.8970|EPS1|CaO19.1392|IPF11068	Predicted ORF in Assemblies 19, 20 and 21
orf19.3097	1.8001	0.0213443	PDA1	orf19.10608|orf19.10609|IPF24178.1|IPF1749.1|Contig4-2877_0005|Contig4-2877_0006|orf6.6949|orf6.6948|CA4412|orf19.3096|CaO19.3097|CaO19.10609	Protein described as similar to alpha chain of pyruvate dehydrogenase; fluconazole-induced; protein detected by mass spec in exponential and stationary phase cultures
orf19.1770	1.7615	0.0239579	CYC1	orf19.9339|orf6.244|IPF25577.1|IPF17424.2|Contig4-1661_0006|CA0038|CaO19.1770|CaO19.9339	Cytochrome c; complements defects of an S. cerevisiae cyc1 cyc7 double mutant; transcriptionally regulated by iron; expression greater in high iron; alkaline downregulated; repressed by nitric oxide
orf19.913.2	1.75799	0.0429333		IPF12970.3|IPF16430.1|CA0118|IPF16430|IPF16430.3	ORF Predicted by Annotation Working Group
orf19.53	1.75518	0.00556018		orf19.7714|IPF27201.1|IPF13142.2|Contig4-2469_0006|orf6.4553|CA2598|CaO19.53|UAF22|CaO19.7714|IPF13142	Predicted ORF in Assemblies 19, 20 and 21
orf19.5285	1.74511	1.00098e-06	PST3	IPF27467.1|Contig4-2561_0001|CA6239|CaO19.5285|PST2	Putative flavodoxin; biofilm induced; fungal-specific (no human or murine homolog); protein detected by mass spec in stationary phase cultures
orf19.5294	1.74184	0.0149106	PDB1	orf19.12753|IPF21857.1|IPF11877.2|Contig4-2497_0006|orf6.3940|CA2162|CaO19.12753|CaO19.5294	Protein described as similar to pyruvate dehydrogenase; fluconazole-induced; protein level decreased in stationary phase cultures
orf19.6561	1.73038	0.0244956	LAT1	orf19.13914|IPF20596.1|IPF1673.1|Contig4-2941_0006|orf6.7549|CA4875|CaJ7.0184|CaJ7_0184|CaO19_6561|CaO19.6561|CaO19.13914	Protein described as dihydrolipoamide acetyltransferase component (E2) of pyruvate dehydrogenase complex
orf19.5286	1.70147	0.0143126	YCP4	IPF27466.1|Contig4-2561_0001|CA6240|CaO19.5286	Putative flavodoxin; fungal-specific (no human or murine homolog)
orf19.3615	1.69157	1.15486e-05		orf19.11098|IPF23666.1|IPF5192.2|Contig4-2505_0010|orf6.3285|CA1675|CaO19.3615|CaO19.11098|IPF5192	Predicted ORF in Assemblies 19, 20 and 21; induced in core caspofungin response; increased expression observed in an ssr1 homozygous null mutant; induced by nitric oxide in yhb1 mutant
orf19.6225	1.68785	0.000141258	PCL7	orf19.13605|IPF11915.2|IPF18998.2|Contig4-2759_0013|orf6.1290|orf6.5131|CA3014|CaO19.6225|IPF11915	Protein described as cyclin-like, possible Pho85p cyclin; hyphal downregulated; transcriptionally activated by Mnl1p under weak acid stress
orf19.2841	1.68745	0.0283024	PGM2	orf19.10359|IPF15073.2|IPF28967.1|Contig4-2083_0003|orf6.1775|CA0692|CaO19.2841	Protein not essential for viability; similar to S. cerevisiae Pgm2p, which is phosphoglucomutase
orf19.7396	1.67468	0.000278913		IPF3311.2|Contig4-2982_0013|orf6.8556|CA5694|CaO19.7396|IPF3311	Predicted ORF in Assemblies 19, 20 and 21
orf19.6225.1	1.67146	0.00643622		IPF20970.1|IPF20125.1|Contig4-1851_0004|CA3013|PET117	ORF Predicted by Annotation Working Group
orf19.2108	1.67049	0.00819415	SOD6	orf19.9656|PGA9|IPF25284.1|IPF15423.2|SOD33|Contig4-1579_0007|Contig4-1856_0002|orf6.4753|CA2737|CaO19.9656|CaO19.2108|IPF15423	Copper- and zinc-containing superoxide dismutase; expression regulated during planktonic growth; member of a gene family that includes SOD1, SOD4, SOD5, and SOD6; gene may contain an intron
orf19.2091	1.66741	0.034525		orf19.9638|IPF25295.1|IPF1164.2|Contig4-2971_0016|orf6.7464|CA4810|CaO19.2091|CaO19.9638|IPF1164	Predicted ORF in Assemblies 19, 20 and 21; repressed by nitric oxide
orf19.7046	1.65387	0.00629547	MET28	IPF3087.1|Contig4-2855_0006|orf6.7972|CA5227|CaJ7.0086|CaJ7_0086|CaO19_7046|CaO19.7046|IPF3087	Protein induced during the mating process
orf19.7481	1.64381	0.0297521	MDH1	orf6.8733|IPF2486.1|MDH1-2|Contig4-2988_0011|CA5826|CaO19.7481|MDH2|MDH11	Protein described as malate dehydrogenase, mitochondrial; transcription regulated by Mig1p and Tup1p, white-opaque switching; induced in high iron, biofilm; regulated upon phagocytosis; antigenic during murine or human infection
orf19.5021	1.63409	0.00096075	PDX1	orf19.12488|IPF22263.1|IPF3038.1|Contig4-3075_0007|orf6.7988|CA5242|CaO19.12488|CaO19.5021	Pyruvate dehydrogenase complex protein X, an essential component of the mitochondrial pyruvate dehydrogenase complex which is involved in the respiratory pathway; protein detected by mass spec in exponential and stationary phase cultures
orf19.1682	1.61342	0.00639162		orf19.9251|IPF25637.1|IPF11681.2|Contig4-2363_0002|orf6.889|CA0216|CaO19.1682|CaO19.9251|IPF11681	Predicted ORF in Assemblies 19, 20 and 21; repressed by nitric oxide
orf19.755	1.61208	0.0242906	MRPL37	orf19.8375|IPF26538.1|IPF13404.1|Contig4-2000_0004|orf6.3634|CA1928|CaO19.755|CaO19.8375	Predicted ORF in Assemblies 19, 20 and 21; shows colony morphology-related gene regulation by Ssn6p
orf19.1701	1.61001	0.0105131	RKI1	orf19.9268|IPF13663.2|IPF29351.1|Contig4-2869_0008|orf6.3042|CA1503|CaO19.9268|CaO19.1701	Predicted ORF in Assemblies 19, 20 and 21
orf19.6047	1.60888	0.00894032	TUF1	orf19.13468|IPF21060.1|IPF1439.1|Contig4-3053_0014|orf6.7591|CA4909|CaO19.6047|CaO19.13468	Putative translation elongation factor; macrophage/pseudohyphal-induced; genes encoding ribosomal subunits, translation factors, and tRNA synthetases are downregulated upon phagocytosis by murine macrophage
orf19.717	1.60445	0.0139497	HSP60	orf19.8336|orf6.2638|IPF26576.1|IPF14025.2|Contig4-2196_0002|CA1239|CaO19.8336|CaO19.717	Protein described as mitochondrial heat shock protein; soluble protein in hyphae; transcription is regulated by Nrg1p; transcriptionally regulated by iron; expression greater in high iron; heavy metal (cadmium) stress-induced
orf19.6874	1.60385	0.0222091		orf19.14163|IPF20227.1|IPF6572.2|Contig4-3086_0028|orf6.7138|CA4564|BAS1|CaO19.6874|CaO19.14163|IPF6572	Predicted ORF in Assemblies 19, 20 and 21
orf19.2173	1.59403	0.0147194	MAF1	orf19.9719|IPF25133.1|IPF10146.2|Contig4-3057_0024|orf6.6090|CA3745	Protein described as affecting nucleocytoplasmic transport and synthesis of RNA Polymerase III; decreased expression in hyphae compared to yeast-form cells; caspofungin repressed
orf19.5515	1.59123	0.000370869		orf19.12961|IPF21602.1|IPF4312.2|Contig4-2439_0006|orf6.4457|CA2518|CaO19.12961|CBP3|CaO19.5515	Predicted ORF in Assemblies 19, 20 and 21
orf19.3331	1.57617	0.0407528	ABC1	orf19.10842|IPF14939.2|IPF17140.3|Contig4-2339_0002|orf6.3338|orf6.5023|CA1712|CaO19.3331	Protein described as ubiquinol-cytochrome-c reductase; induced upon adherence to polystyrene
orf19.4887	1.56267	0.0121897	ECM21	orf19.12352|IPF18663.2|IPF7541.3|Contig4-2934_0009|orf6.3053|orf6.3331|ECM21.3|CA1707|CaO19.4887|CA1515|IPF18663.1	Protein not essential for viability; similar to S. cerevisiae Ecm21p (may have cell wall role); alkaline upregulated by Rim101p; fluconazole induced; caspofungin repressed; downregulated in azole-resistant strain overexpressing MDR1
orf19.7330	1.562	0.000142245		IPF1983.1|Contig4-3033_0015|orf6.8411|CA5566|CaO19.7330|PET18	Predicted ORF in Assemblies 19, 20 and 21
orf19.14	1.55594	0.00605371		orf19.7687|IPF11562.1|orf6.1702|CaO19.14|ZSP14|CaO19.7687	Predicted ORF from Assembly 19; removed from Assembly 20
orf19.6178	1.54579	0.0291336	FBP1	IPF3435.1|Contig4-3079_0011|orf6.5399|CA3199|CaO19.6178	Fructose-1,6-bisphosphatase, a key enzyme of gluconeogenesis; involved in the carbohydrate metabolism; regulated by Efg1p, Ssn6p; upregulated upon phagocytosis, effecting switch from glycolysis to gluconeogenesis in macrophage
orf19.3527	1.54564	0.0202891	CYT1	orf19.11011|orf6.1503|orf6.2040|IPF23744.1|IPF4458.2|Contig4-2446_0010|CA0864|CaO19.3527|CA0524|CYT12|IPF18952.1	Protein described as cytochrome c1; transcriptionally regulated by iron; expression greater in high iron; alkaline downregulated
orf19.3532	1.54334	0.00600123	MRPL10	orf19.11016|IPF19871.1|IPF4468.3|orf6.1498|CA0519|CaO19.3532|CaO19.11016|MRPL10.3	Predicted ORF in Assemblies 19, 20 and 21; shows colony morphology-related gene regulation by Ssn6p
orf19.6696	1.54174	0.015875	TIM9	orf19.13988|IPF20492.1|IPF2599.1|Contig4-3088_0031|orf6.6805|CA4298|CaJ7.0415|CaO19.13988|CaJ7_0415|CaO19_6696|CaO19.6696	Predicted ORF in Assemblies 19, 20 and 21; transcription is upregulated in both intermediate and mature biofilms
orf19.4883	1.53484	7.90708e-05		orf19.12346|IPF9706.2|IPF18549.2|Contig4-2738_0012|orf6.1623|orf6.3842|CA0596|CaO19.4883|IPF9706	Predicted ORF in Assemblies 19, 20 and 21; constitutive expression independent of MTL or white-opaque status
orf19.1427	1.53201	0.010031		orf19.9003|IPF25909.1|IPF9376.1|Contig4-2598_0001|orf6.6396|CA3966|CaO19.1427|CaO19.9003|IPF9376	Putative transporter; fungal-specific (no human or murine homolog)
orf19.1314	1.52861	0.0393309		orf19.8894|IPF26016.1|IPF17153.2|orf6.4876|CA2822|CaO19.1314|CaO19.8894|IPF14550	Predicted ORF in Assemblies 19, 20 and 21
orf19.4737	1.52827	0.0163923	TPO3	orf19.12199|orf6.3649|YPR156|YGR138|DHA12|IPF11759.2|IPF10646.3|Contig4-2892_0021|orf6.2088|CA1943|IPF11759|CaO19.4737|IPF11759.3f	Possible role in polyamine transport; MFS-MDR family; transcription induced by Sfu1p, regulated upon white-opaque switching; decreased expression in hyphae compared to yeast-form cells; regulated by Nrg1p; fungal-specific
orf19.5413	1.52531	0.000856398		orf19.12868|IPF21740.1|IPF1104.1|Contig4-2864_0015|orf6.8649|CA5771|PRP46|CaO19.12868|CaO19.5413|IPF1104	Predicted ORF in Assemblies 19, 20 and 21
orf19.863	1.51609	0.00391758		orf19.8482|IPF26428.1|IPF7643.1|Contig4-2942_0011|orf6.3551|CA1863|CaO19.863|MRPL35|CaO19.8482	Predicted ORF in Assemblies 19, 20 and 21
orf19.6937	1.51513	0.024628	PTR2	orf19.14199|IPF20186.1|IPF4202.2|Contig4-3085_0002|orf6.7323|CA4707|PTR22|CaO19.14199|CaO19.6937|PTR21	Putative oligopeptide transporter; regulated by Stp2p and Stp3p; transcriptionally induced upon phagocytosis by macrophage; downregulated by Rim101p at pH 8
orf19.5641	1.51278	0.0128725	CAR2	orf19.13086|IPF21531.1|IPF12355.2|Contig4-2558_0006|orf6.4510|CaO19.5641|CaO19.13086|CA2561	Alkaline upregulated; mutation confers hypersensitivity to toxic ergosterol analog, and to amphotericin B
orf19.5591	1.50882	0.0126766	ADO1	orf19.13037|IPF6804.2|IPF27983.1|Contig4-2698_0008|orf6.1761|orf6.4433|CA0685|CaO19.5591	Putative protein of unknown function; heterozygous null mutant exhibits resistance to cordycepin in the C. albicans fitness test; ketoconazole-induced; protein level decreased in stationary phase cultures
orf19.989	1.50822	0.0270231		orf19.8604|IPF9936.2|IPF6773.2|IPF20059.1|Contig4-2262_0002|orf6.5809|orf6.1598|CA6251|CA3526|orf19.990.1|MRPS5|MRPS5.5f|MRPS5.3f	Predicted ORF in Assemblies 19, 20 and 21
orf19.3353	0.663503	0.0166306		orf19.10861|IPF4820.2|IPF18808.1|IPF18809.1|Contig4-2944_0016|orf6.2235|orf6.2295|CA1022|IPF4820.5f|IPF4820	Protein described as similar to a mitochondrial complex I intermediate-associated protein; fluconazole-downregulated
orf19.5487	0.661141	0.0481171	CDC46	orf19.12942|IPF21660.1|IPF10979.2|Contig4-2604_0008|orf6.4181|CA2324|MCM5|CaO19.5487|CaO19.12942	Protein described as having role in control of cell division; periodic mRNA expression, peak at cell-cycle M/G1 phase; regulated by tyrosol and cell density; Plc1p-regulated; repressed in response to alpha pheromone in SpiderM medium
orf19.1945	0.66111	0.000453671	AUR1	orf19.9500|IPF11286.2|IPF18866.2|Contig4-2985_0028|orf6.1971|orf6.5594|CA3353|CaO19.1945	Inositolphosphorylceramide (IPC) synthase, catalyzes the key step in the synthesis of sphingolipids; target for antifungal drugs; mutation confers hypersensitivity to aureobasidin A
orf19.5686	0.661063	0.0325165		IPF5460.1|Contig4-2927_0011|orf6.4564|CaO19.5686	Predicted ORF in Assemblies 19, 20 and 21
orf19.4890	0.658857	0.0125295	CLA4	orf19.12355|IPF15972.3|IPF16297.2|Contig4-2934_0017|orf6.3334|orf6.53|CA1710|CaO19.4890	S/T kinase of Ste20p family; required for wild-type filamentous growth and for wild-type organ colonization and virulence in mouse systemic infection; role in chlamydospore formation; functional homolog of S. cerevisiae Cla4p
orf19.4270	0.658626	0.0404833		orf19.11746|IPF22942.1|IPF9529.2|orf6.3487|CA1820|CaO19.11746|CaO19.4270|IPF9529	Predicted ORF in Assemblies 19, 20 and 21
orf19.1358	0.657727	0.0204265	GCN4	orf19.8938|IPF25958.1|IPF8919.2|Contig4-1860_0002|orf6.5290|CA3126|CaO19.1358|CaO19.8938	Transcriptional activator of general amino acid control response; required for Efg1p-dependent pseudohyphal filament induction by amino acid starvation but not by serum; upregulated in the presence of human whole blood or PMN cells
orf19.3481	0.654694	0.0187512		orf19.10985|IPF23785.1|IPF15646.2|Contig4-2024_0003|orf6.4978|CA2898|CaO19.10985|CaO19.3481|IPF15646	Putative protein of unknown function, transcription is activated in the presence of elevated CO2; predicted ORF in Assemblies 19, 20 and 21
orf19.7049	0.654	0.0015696	CYB5	CYTB5|orf6.8505|orf6.8504|IPF443.1|Contig4-2871_0008|CA5645|CaJ7.0084|CaO19.7049|CaJ7_0084	Cytochrome b(5); not essential for viability; similar to S. cerevisiae Cyb5p; transcriptionally regulated by iron; expression greater in high iron; fluconazole-induced; shows colony morphology-related gene regulation by Ssn6p
orf19.1690	0.652541	0.00813755	TOS1	orf19.9258|IPF25628.1|IPF6517.2|Contig4-2909_0012|orf6.4149|CA2303|CaO19.1690	Protein described as similar to alpha agglutinin anchor subunit; exogenously expressed protein is a substrate for Kex2p processing in vitro; fluconazole-induced; transcription is induced in response to alpha pheromone in SpiderM medium
orf19.1799	0.651562	0.0496298		orf19.9365|IPF19643.2|IPF19644.1|Contig4-3019_0033|orf6.2231|orf6.4378|GAP6|CA0981|GAP12|CaO19.1799|GAP4	Putative general amino acid permease; fungal-specific (no human or murine homolog)
orf19.6972	0.651339	0.0156843	SMI1B	IPF7557.1|Contig4-2973_0016|orf6.7718|CA5019|SMI1|CaO19.6972|IPF7557	Protein of unknown function; transcription is negatively regulated by Rim101p
orf19.7085	0.650401	0.0280714		IPF525.1|Contig4-3106_0036|orf6.8468|CA5613|CaJ7.0047|CaO19.7085|CaJ7_0047|CaO19_7085|IPF525	Predicted ORF in Assemblies 19, 20 and 21; induced in core stress response; induced by heavy metal (cadmium) stress via Hog1p; oxidative stress-induced via Cap1p; induced by Mnl1p under weak acid stress; macrophage-downregulated
orf19.3221	0.650192	0.0467441	CPA2	orf19.10732|IPF24081.1|IPF4967.1|Contig4-2886_0008|CA0687|CaO19.10732|CaO19.3221|orf6.1765	Predicted ORF in Assemblies 19, 20 and 21; protein detected by mass spec in stationary phase cultures; transcription is upregulated in both intermediate and mature biofilms
orf19.3392	0.650082	0.0494439	DOG1	orf19.10895|IPF23846.1|IPF9474.2|DOG2|Contig4-1966_0001|Contig4-2516_0009|orf6.1809|CA0716|CaO19.3392|CaO19.10895	Putative 2-deoxyglucose-6-phosphatase; haloacid dehalogenase hydrolase/phosphatase superfamily; similar to S. cerevisiae Dog1p, Dog2p, Hor1p, and Rhr2p; regulated by Nrg1p, Tup1p
orf19.801	0.648261	0.0140096	TBF1	orf19.8420|IPF5070.2|IPF19724.1|Contig4-2905_0023|orf6.1354|orf6.2550|CA1182|CaO19.801|IPF19724	Essential transcriptional activator that binds to a conserved sequence at ribosomal protein genes and the rDNA locus; acts with Cbf1p at a subset of promoters; biological role is analogous to that of S. cerevisiae Rap1p, not to S.c. Tbf1p
orf19.5576	0.646147	0.0420593		orf19.13022|orf19.13023|IPF21625.1|IPF16507.2|Contig4-1786_0001|orf6.1723|orf6.1724|YDR531W|CA0659|CA0660|orf19.5577|IPF16189.3f	Protein similar to S. cerevisiae Ydr531wp; transposon mutation affects filamentous growth; downregulated in core stress response
orf19.3984	0.644224	0.0338186		orf19.11467|IPF19142.1|IPF18339.2|orf6.5660|orf6.7397|orf6.794|CA0184|IPF19142	Predicted ORF in Assemblies 19, 20 and 21; induced in core caspofungin response; increased expression observed in an ssr1 homozygous null mutant; induced by nitric oxide in yhb1 mutant
orf19.3145.4	0.637949	0.016586		IPF13728.1	ORF Predicted by Annotation Working Group; removed from Assembly 20
orf19.4309	0.63722	0.00102546	GRP2	orf19.11785|Contig4-2902_0012|GRE99|IPF18654.2|IPF2918.2|orf6.3162|orf6.4614|CA2644|GRE22|CaO19.4309	Similar to S. cerevisiae Gre2p (methylglyoxal reductase); antigenic in human; regulation associated with azole resistance; induced in core stress response or by oxidative stress (via Cap1p), fluphenazine, benomyl, or fluconazole (long term)
orf19.4975	0.635833	0.0173703	HYR1	orf19.12440|Contig4-2860_0006|GPX1|IPF19734.1|IPF19516.2|orf6.3143|orf6.857|CA1576|CaO19.4975|CA0557|HYR1.53|IPF7957.2	Nonessential, GPI anchored, predicted cell wall protein; macrophage-induced protein; induced in hyphae; induction associated with azole resistance; regulated by Rfg1p, Efg1p, Nrg1p, Tup1p, Cyr1p
orf19.1280	0.634809	0.00121094	SUI1	orf19.8867|IPF10374.1|IPF29514.1|Contig4-2808_0003|orf6.4245|CA2367|CaO19.1280|CaO19.8867	Putative translation initiation factor; flucytosine induced; genes encoding ribosomal subunits, translation factors, and tRNA synthetases are downregulated upon phagocytosis by murine macrophage
orf19.744	0.632506	0.0104649	GDB1	orf19.8363|IPF26560.1|IPF9743.2|IPF9740|orf6.4133|CA2291|CaO19.744|CaO19.8363	Putative glycogen debranching enzyme; expression is regulated upon white-opaque switching; regulated by Nrg1p, Tup1p
orf19.1486	0.631896	0.0194216		orf19.9061|IPF6011.2|IPF6010.3|Contig4-2638_0008|orf6.2256|CA1000|CaO19.9061|CaO19.1486|IPF6011	Predicted ORF in Assemblies 19, 20 and 21; possibly spurious ORF (Annotation Working Group prediction)
orf19.1491	0.631876	0.00869496		orf19.9068|IPF14405.2|IPF5991.3|Contig4-2801_0010|orf6.1460|orf6.2805|CA0492|CaO19.1491|SNU71	Predicted ORF in Assemblies 19, 20 and 21
orf19.4998	0.629587	0.0017648		orf19.12465|IPF22198.1|IPF1798.2|orf6.8011|CA5264|CaO19.4998|CHA4|CaO19.12465|IPF1798	Predicted ORF in Assemblies 19, 20 and 21; caspofungin repressed
orf19.3522	0.625971	0.0313322		orf19.11005|IPF17272|IPF19533.2|IPF17272.2|Contig4-1527_0001|Contig4-2828_0015|orf6.2035|CA0860|CaO19.11005|CaO19.3522|IPF17272.3f	Predicted ORF in Assemblies 19, 20 and 21; transcription is downregulated in response to treatment with ciclopirox olamine
orf19.4899	0.617486	0.00914212	GCA1	orf19.12365|MP190|IPF22352.1|IPF8948.2|AMYG1|Contig4-2932_0006|Contig4-2955_0029|orf6.2026|orf6.4236|orf6.5799|orf6.649|CA0855|CaO19.4899	Predicted extracellular or plasma membrane-associated glucoamylase; promotes biofilm matrix formation; possible adhesin; gene is transcribed during rat oral infection; transcription is regulated by carbohydrates, pH, galactose
orf19.4649	0.611782	0.00243657		orf19.12118|IPF22676.1|IPF9312.1|Contig4-3006_0019|orf6.3346|CA1718|CaO19.12118|CaO19.4649|IPF9312	Putative transcription factor with zinc cluster DNA-binding motif
orf19.6155	0.603358	0.00225666		CDC9|IPF9796.2|Contig4-2784_0016|orf6.5316|CA3145|CaO19.6155	Predicted ORF in Assemblies 19, 20 and 21
orf19.3352	0.601677	0.0203528		orf19.10860|IPF4817.1|IPF17315.2|IPF18807.1|Contig4-2944_0011|orf6.2236|orf6.2296|CA6276|IPF4817.5f	Predicted ORF in Assemblies 19, 20 and 21
orf19.1591	0.600303	0.00551954	ERG10	IPF13331.2|POT14|orf6.1069|CA0290|CaO19.1591	Protein similar to acetyl-CoA acetyltransferase; role in ergosterol biosynthesis; soluble in hyphae; changes in protein abundance associated with azole resistance; fluconazole or ketoconazole induced; macrophage-downregulated protein
orf19.1536	0.600135	0.0154074		orf19.9111|IPF19060.1|Contig4-2088_0003|orf6.1061|orf6.1062|orf6.2308|CA6257|CA1030|orf19.1537|ZRC.5f	Predicted ORF in Assemblies 19, 20 and 21
orf19.3433	0.598907	0.00818612	OYE23	orf19.10937|IPF19549.2|IPF19548.1|orf6.6472|orf6.92|OYE21|EBP4|CA4030|CaO19.3433	Putative NAPDH dehydrogenase; induced by nitric oxide, benomyl; oxidative stress-induced via Cap1p; fungal-specific (no human or murine homolog)
orf19.7341	0.597728	0.046086		IPF2007.1|Contig4-2924_0009|orf6.8422|CA5574|CaO19.7341|IPF2007	Predicted ORF in Assemblies 19, 20 and 21; ketoconazole-repressed
orf19.4869	0.596674	0.000741831	SFU1	orf19.12333|orf6.2584|IPF22421.1|IPF19906.1|Contig4-2622_0003|Contig4-2622_0004|CA1201|CaO19.12333|CaO19.4869|IPF19906	Transcriptional regulator of iron-responsive genes; represses some iron utilization genes when iron is present; not required for wild-type hyphal growth; has two GATA1-like zinc fingers separated by Cys-rich iron-sensing region
orf19.2777	0.596498	0.00907534		orf19.10293|IPF24622.1|IPF6516.2|orf6.6575|CaO19.10293|CaO19.2777	Predicted ORF from Assembly 19; removed from Assembly 20
orf19.3732	0.594572	0.00201007	ERG25	orf19.11216|ERG251|IPF23536.1|IPF9179.2|Contig4-3070_0024|orf6.1690|CA0642|CaO19.11216|CaO19.3732	Putative C-4 methyl sterol oxidase with role in C4-demethylation of ergosterol biosynthesis intermediates, based on similarity to S. cerevisiae Erg25p; fluconazole-induced; upregulated in biofilm and in azole-resistant strain
orf19.5178	0.594352	0.0107097	ERG5	orf19.12645|IPF22052.1|IPF5398.1|Contig4-2348_0004|orf6.6958|CA4418|CaJ7.0323|CaO19.12645|CaO19.5178|CaO19_5178|CaJ7_0323	Putative C-22 sterol desaturase; fungal C-22 sterol desaturases are cytochrome P450 enzymes of ergosterol biosynthesis, catalyze formation of the C-22(23) double bond in the sterol side chain; transposon mutation affects filamentous growth
orf19.3249	0.590398	0.00592915	LAG1	orf19.10759|IPF24037.1|IPF233.1|Contig4-3062_0013|orf6.8249|CA5446|CaO19.3249|CaO19.10759	Predicted ORF in Assemblies 19, 20 and 21; amphotericin B repressed
orf19.1446	0.589697	0.0015992	CLB2	orf19.9021|IPF25776.1|IPF7873.2|CYB1|Contig4-3018_0026|orf6.7127|CA4553|CaO19.9021|CaO19.1446	B-type mitotic cyclin (cyclin-dependent protein kinase regulatory subunit); essential; required for wild-type mitotic exit; role in cell polarization; interacts with catalytic subunit Cdk1p
orf19.6026	0.589621	0.00186579	ERG2	orf19.13447|IPF21092.1|IPF7901.2|Contig4-2833_0009|orf6.3930|CA2154|CaO19.6026|CaO19.13447	C-8 sterol isomerase; enzyme of ergosterol biosynthesis pathway; converts fecosterol to episterol; mutant is hypersensitive to multiple drugs; ketoconazole-induced
orf19.125	0.586113	0.00586629	EBP1	orf19.7772|Contig4-2900_0026|IPF7044.2|IPF29953.1|orf6.2606|CA1216|CaO19.125	NADPH oxidoreductase; interacts with phenolic substrates, such as 17beta-estradiol; possible role in response to estrogen; induced by oxidative and weak acid stress, nitric oxide, benomyl; activated by Cap1p, Mnl1p; no mammalian homolog
orf19.5779	0.583771	0.0477579	RNR1	orf19.13201|orf6.4851|IPF21372.1|IPF11704.2|Contig4-2695_0002|Contig4-2973_0004|CA2805|CaO19.5779|CaO19.13201	Protein similar S. cerevisiae Rnr1p, large subunit of ribonucleotide reductase; expression greater in low iron; transposon mutation affects filamentous growth; farnesol upregulated in biofilm; regulated by cell cycle, tyrosol, cell density
orf19.3910	0.583657	0.0436486		orf19.11391|IPF23262.1|IPF15494.2|Contig4-2817_0009|orf6.5138|CA3019|CaO19.3910|RNY12|CaO19.11391|IPF15494	Predicted ORF in Assemblies 19, 20 and 21
orf19.1935	0.582419	0.0226093		IPF9572.1|Contig4-2985_0002|orf6.831|CaO19.1935	Predicted ORF in Assemblies 19, 20 and 21; possibly spurious ORF (Annotation Working Group prediction)
orf19.1149	0.582089	0.0422403	MRF1	orf19.8742|IPF11717.2|IPF14722.3|Contig4-2773_0007|orf6.100|orf6.2782|CA1333|ETR2|CaO19.1149	Protein similar to mitochondrial respiratory proteins; increased transcription observed upon benomyl treatment; induced by farnesol, nitric oxide, core stress response; oxidative stress-induced via Cap1p
orf19.4077	0.57973	0.0129627	MIT1	orf19.11558|SUR1|IPF2067.2|IPF28522.1|Contig4-2072_0001|Contig4-2072_0002|orf6.3203|CA1619|CaO19.11558|CaO19.4077|IPF2067	Protein involved in sphingolipid biosynthesis; required for mannosylation of inositol phosphoceramide (IPC) to form mannosylated sphingolipids MIPC and M(IP)2C; fluconazole, caspofungin induced; macrophage-downregulated gene
orf19.2262	0.570539	0.00144063		orf19.9802|IPF25057.1|IPF11105.2|Contig4-2843_0016|orf6.5884|CA3578|ZTA1|CaO19.2262|CaO19.9802|IPF11105	Predicted ORF in Assemblies 19, 20 and 21; similar to quinone oxidoreductases; increased transcription is observed upon benomyl treatment; induced by nitric oxide; oxidative stress-induced via Cap1p
orf19.3751	0.569678	0.0352586		orf19.11235|IPF23518.1|IPF12811.2|Contig4-2818_0016|orf6.4215|CA2348|CaO19.11235|CaO19.3751|IPF12811	Predicted ORF in Assemblies 19, 20 and 21
orf19.3475	0.567799	0.00124003		orf19.10979|IPF11725|IPF11725.2|IPF12058.2|Contig4-2835_0016|orf6.432|orf6.4984|CA2903|CaO19.3475	Described as a Gag-related protein; hyphal induced; downregulation correlates with clinical development of fluconazole resistance; repressed by nitric oxide, 17-beta-estradiol, ethynyl estradiol
orf19.4459	0.564803	0.0260124		orf19.11939|IPF22769.1|IPF11849.2|Contig4-2719_0006|Contig4-2719_0007|orf6.2833|YNL234W|CA1365|CaO19.4459|CaO19.11939|IPF11849	Predicted ORF in Assemblies 19, 20 and 21; similar to S. cerevisiae Ynl234wp, which is a putative heme-binding stress-related protein; transposon mutation affects filamentous growth
orf19.2296	0.562682	0.0213232		orf19.8300|orf19.9831|IPF25023.1|IPF14282.3|IPF7715.3|IPF29744.1|Contig4-2776_0014|orf6.1793|orf6.3697|orf6.1373|CA0446|CA0706|orf19.682|CaO19.2296|IPF14282.5eoc|IPF14282|IPF14282.2	Predicted ORF in Assemblies 19, 20 and 21; similar to mucins; ketoconazole-induced; fluconazole-downregulated; greater mRNA abundance observed in a cyr1 homozygous null mutant than in wild type; colony morphology-related gene regulation by Ssn6p
orf19.2768	0.55861	0.00493231	AMS1	orf19.10284|IPF24664.1|IPF7076.2|Contig4-2513_0006|orf6.6584|CA4123|CaO19.2768|CaO19.10284	Putative alpha-mannosidase; transcription is regulated by Nrg1p; induced during cell wall regeneration
orf19.3642	0.558529	0.0184685	SUN41	orf19.11124|orf6.2071|IPF23637.1|IPF14577.2|Contig4-2119_0002|CA0883|SUN4|CaO19.3642|CaO19.11124	Putative cell wall glycosidase involved in biofilm formation; required for cell separation; hyphal induced; caspofungin repressed; Efg1p, Cph1p regulated; O-glycosylation, potential Kex2p substrate; 9 5' E-boxes; 5'-UTR intron
orf19.5770	0.558177	0.0376266	OPT8	orf19.13192|IPF19226.2|IPF6990.2|Contig4-3026_0011|Contig4-3026_0013|orf6.582|orf6.6188|CA3821|CaO19.5770|IPF6990	Possible oligopeptide transporter; similar to Opt1p and to S. cerevisiae Ygl114wp, but not other OPTs; induced by nitric oxide, amphotericin B; expression of OPT6, -7, or -8 does not suppress defect of mutant lacking Opt1p, Opt2p, and Opt3p
orf19.2170	0.555979	0.00138606	PHM7	orf19.9716|IPF25099.1|IPF10153.2|Contig4-3057_0029|orf6.6093|CA3747|CaO19.2170|IPF10153	Putative transporter; fungal-specific (no human or murine homolog); Hog1p-downregulated; downregulated in response to 17-beta-estradiol, ethynyl estradiol
orf19.1631	0.553124	0.000522041	ERG6	orf19.9199|IPF25638.1|IPF4255.2|Contig4-2997_0019|orf6.6441|CA4005|CaO19.9199|CaO19.1631	Delta(24)-sterol C-methyltransferase, converts zymosterol to fecosterol in ergosterol biosynthesis by methylating position C-24; mutation confers nystatin resistance; fluconazole-induced; transcription increased in azole-resistant strain
orf19.5102	0.551274	0.0311787	PLB5	orf19.12568|IPF13965.2|IPF17127.3|Contig4-2297_0003|orf6.4037|orf6.6348|CA2223|CaO19.5102	Putative phospholipase B, fungal-specific (no human or murine homolog); null mutation eliminates cell-associated phospholipase A2 activity and attenuates virulence; putative GPI anchor
orf19.2172	0.550198	0.0284943	ARA1	orf19.9718|IPF25141.1|IPF10148.2|Contig4-3057_0027|orf6.6091|CA3746|CaO19.9718|CaO19.2172	D-Arabinose dehydrogenase; in dehydro-D-arabinono-1,4-lactone biosynthesis; NADP+ cofactor; active toward D-arabinose, L-fucose, L-xylose, L-galactose; inhibited by metal ions, thiol group-specific reagents; induced on polystyrene adherence
orf19.6079	0.546396	0.00796069		IPF14618|IPF14618.2|Contig4-2960_0013|orf6.1065|orf6.1757|CA0286|CaO19.6079|IPF14618.1	Predicted ORF in retrotransposon Tca8 with similarity to the Gag region encoding nucleocapsid-like protein; transcription is downregulated in response to treatment with ciclopirox olamine; filament induced; regulated by Rfg1p, Tup1p
orf19.3414	0.537259	0.0110332	SUR7	orf19.10917|IPF12442.1|IPF12038.2|Contig4-2923_0010|orf6.360|CA0055|CaO19.10917|CaO19.3414|IPF12442	Protein required for wild-type cell wall, plasma membrane, cytoskeletal organization, endocytosis; localizes to eisosome subdomains of plasma membrane; four transmembrane motifs; mutant shows ectopic, chitin-rich cell wall
orf19.789	0.535749	0.00500875	PYC2	orf19.8408|orf6.2989|IPF26382.1|IPF26504.1|IPF15163.2|IPF15167.2|Contig4-3027_0007|CA1464|PYC2.3f|PYC2.exon2	Putative pyruvate carboxylase, binds to biotin cofactor; up-regulated in mutant lacking the Ssk1p response regulator protein, upon benomyl treatment, or in an azole-resistant strain overexpressing MDR1
orf19.7381	0.53468	0.0219309		IPF1292|IPF1292.1|Contig4-3093_0048|orf6.8541|CA5678|CaO19.7381	Predicted zinc-finger protein of unknown function; not essential for viability
orf19.3799	0.530974	0.000691453		orf19.11280|IPF23463.1|IPF14247.2|Contig4-3100_0004|orf6.2917|CA1423|CaO19.3799|RTN1|CaO19.11280|IPF14247	Predicted ORF in Assemblies 19, 20 and 21
orf19.1598	0.529007	0.0152953	ERG24	orf19.9166|IPF25723.1|IPF3764.2|Contig4-3095_0045|orf6.1086|orf6.1911|CA0300|CaO19.9166|CaO19.1598	C-14 sterol reductase, has a role in ergosterol biosynthesis; mutation confers increased sensitivity to dyclonine
orf19.3493	0.528416	0.000202452		IPF19883.1	Predicted ORF from Assembly 19; removed from Assembly 20
orf19.113	0.520439	0.0277384	CIP1	orf19.7761|IPF11929.2|IPF14967.2|COR33|Contig4-2149_0001|Contig4-2501_0003|orf6.1181|orf6.2562|CA1190|CaO19.113	Protein with slight similarity to plant isoflavone reductase; transcription induced by cadmium (specifically, not by other heavy metals or heat shock), yeast-hyphal switch, oxidative stress (via Cap1p), or macrophage interaction
orf19.7152	0.519	0.0358034		IPF1943.2|Contig4-3083_0008|Contig4-3083_0009|orf6.8052|CA5290|CaJ7.0487|CYS4|CaO19.7152|CaJ7_0487|CaO19_7152|IPF1943	Protein similar to Aspergillus CYSK O-acetylserine sulfhydrylase, suggesting that C. albicans uses an O-acetyl-serine (OAS) pathway of sulfur assimilation; upregulated in biofilm; protein level decreased in stationary phase cultures
orf19.7610	0.510626	0.0102865	PTP3	IPF643.2|Contig4-3108_0065|Contig4-3108_0066|orf6.8958|CA6009|CaO19.7610|IPF643	Protein not essential for viability; similar to S. cerevisiae Ptp3p, which is a protein tyrosine phosphatase; hyphal induced; alkaline upregulated; regulated by Efg1p, Ras1p, cAMP pathways
orf19.7304	0.508127	0.00289559		IPF19812.1|Contig4-2245_0009|orf6.8385|CA5542|IPF19812|CaO19.7304	Predicted ORF in Assemblies 19, 20 and 21
orf19.4907	0.505453	0.00236039		orf19.12373|IPF22400.1|IPF17283.2|Contig4-2762_0012|orf6.3754|CA2021|CaO19.12373|CaO19.4907|IPF17283	Predicted ORF in Assemblies 19, 20 and 21; increased transcription is observed upon fluphenazine treatment; possibly transcriptionally regulated by Tac1p; induced by nitric oxide; fungal-specific (no human or murine homolog)
orf19.2125	0.504419	0.0288005		IPF16257.1|IPF29197.1|Contig4-1838_0003|orf6.864|CaO19.2125	Predicted ORF in Assemblies 19, 20 and 21
orf19.1715	0.499844	0.00832906	IRO1	orf19.9283|orf6.4843|IPF11363.1|IPF29338.1|Contig4-2578_0004|Contig4-2578_0006|orf6.4845|CA2802|CaO19.9283|CaO19.1715|IPF11363	Putative transcription factor; role in iron utilization, pathogenesis; both IRO1 and adjacent URA3 are mutated in strain CAI4; suppresses S. cerevisiae aft1 mutant low-iron growth defect; hyphal-induced; reports differ about iron regulation
orf19.2685	0.499054	0.00520128	PGA54	orf19.10200|IPF24619.1|IPF15870.2|Contig4-2214_0002|orf6.4795|CA2769|CaO19.2685|CaO19.10200|IPF15870	Putative GPI-anchored protein; hyphal induced; Hog1p-downregulated; induced in a cyr1 or efg1 homozygous null mutant; shows colony morphology-related gene regulation by Ssn6p; upregulated in an RHE model
orf19.682	0.495643	0.000167912		orf19.8300|IPF7715.3|IPF29744.1|Contig4-2776_0014|orf6.1793|orf6.3697|CA0706|CaO19.682|IPF7715.3eoc|IPF7715|IPF7715.2	Predicted ORF from Assembly 19; ketoconazole-induced; fluconazole-downregulated; induced in a cyr1 homozygous null mutant; shows colony morphology-related gene regulation by Ssn6p; merged with orf19.2296 in Assembly 20
orf19.7374	0.495302	0.00539874	CTA4	IPF1269.1|Contig4-3093_0011|orf6.8534|CA5671|CaO19.7374	Predicted transcription factor involved in response to nitric oxide; downregulated upon adherence to polystyrene; induced by nitric oxide; transcriptionally activated by Mnl1p under weak acid stress
orf19.1153	0.489333	0.00493195	GAD1	orf19.8745|IPF11712.3|IPF7609.1|Contig4-2834_0001|orf6.2779|orf6.3128|CA1564|CaO19.1153	Protein described as glutamate decarboxylase; macrophage-downregulated gene; alkaline downregulated; amphotericin B induced; transcriptionally activated by Mnl1p under weak acid stress
orf19.6402	0.487294	0.00811283	CYS3	orf19.13760|IPF20738.1|IPF5115.2|Contig4-2839_0007|orf6.7852|CA5127|CaO19.13760|CaO19.6402	Predicted enzyme of sulfur amino acid biosynthesis; upregulated in biofilm; alkaline upregulated; amphotericin B induced; possibly adherence-induced; induced by heavy metal (cadmium) stress, oxidative stress (via Cap1p); Hog1p regulated
orf19.2613	0.484165	0.00615573	ECM4	orf19.10144|IPF24763.1|IPF8505.2|Contig4-2859_0005|orf6.4272|ECM41|CA2386|ECM41.3f|ECM41.3	Protein similar to S. cerevisiae Ecm4p; transcription is regulated by Nrg1p and Tup1p; induced in core stress response or in cyr1 or ras1 homozygous null mutant (yeast-form or hyphal cells); transposon mutation affects filamentous growth
orf19.4033	0.480812	2.1727e-05	PRP22	orf19.11516|IPF23374.1|IPF8801.2|Contig4-3094_0013|orf6.7446|CA4797|CaO19.4033|CaO19.11516	Protein described as an RNA-dependent ATPase; induced upon adherence to polystyrene; transcriptionally activated by Mnl1p under weak acid stress
orf19.3822	0.477457	0.0195706	SCS7	orf19.11303|orf6.7517|IPF23462.1|IPF5819.1|Contig4-2989_0014|CA4852|CaO19.3822|CaO19.11303	Protein described as ceramide hydroxylase; transcription is regulated by Nrg1p; transcriptionally regulated by iron; expression greater in high iron; fluconazole-induced
orf19.4056	0.474098	0.0471583	GAT2	orf19.11538|IPF23188.1|IPF7666.2|Contig4-2593_0012|orf6.2451|CA1120|CaO19.11538|CaO19.4056|IPF7666	Putative DNA-binding transcription factor; similar to S. cerevisiae Gat2p; transposon mutation affects filamentous growth
orf19.4409	0.470373	0.00118862		orf19.11887|IPF15081|IPF22844.1|IPF15081.2|orf6.2973|CA1455|CaO19.11887|CaO19.4409	Protein not essential for viability
orf19.2693	0.469861	0.0495925	GST2	orf19.10208|YNL229C|Contig4-2782_0006|IPF24629.1|IPF7968.2|IPF7968|Contig4-2865_0012|orf6.5481|CA3260|CaO19.10208|CaO19.2693	Increased transcription is observed upon benomyl treatment transcription and in populations of cells exposed to fluconazole over multiple generations; regulated by Nrg1p, Tup1p; induced by nitric oxide
orf19.922	0.469697	0.0429068	ERG11	orf19.8538|ERG16|CYP51|P45014DM|orf6.98|orf6.1245|L1A1|IPF19860.2|IPF8427.2|Contig4-2692_0009|orf6.2866|CA1387|CaO19.922	Lanosterol 14-alpha-demethylase, member of cytochrome P450 family that functions in ergosterol biosynthesis; target of azole antifungals; may contribute to drug resistance; azole- or biofilm-induced; subject to hypoxic regulation
orf19.4980	0.468598	0.000307919	HSP70	orf19.12447|HS71|SSA1|IPF22233.1|IPF11819.2|SSA4|Contig4-2251_0001|CA1230|CaO19.4980|CaO19.12447|orf6.2627	Putative hsp70 chaperone; role in sensitivity to beta-defensins; heat-shock, amphotericin B, Cd, ketoconazole-induced; farnesol-downregulated in biofilm; farnesol-induced; surface localized in yeast-form and hyphal cells; antigenic in host
orf19.868	0.462348	0.0467085	ADAEC	orf19.8487|IPF3937.2|IPF3935.3|Contig4-2634_0003|orf6.2588|orf6.72|CA1203|CaO19.868|IPF3937	Transcription is specific to white cell type
orf19.3869	0.450721	7.33526e-05		orf19.11350|IPF17190.2|IPF12184.3|Contig4-2055_0006|orf6.550|orf6.5840|CA0110|CaO19.3869|IPF17190	Predicted ORF in Assemblies 19, 20 and 21; regulated by Tsa1p, Tsa1Bp in minimal media at 37 deg; shows colony morphology-related gene regulation by Ssn6p
orf19.7297	0.448547	0.0230132		IPF2837.2|Contig4-2774_0001|Contig4-2774_0012|orf6.8378|CA5536|CaO19.7297|IPF2837	Predicted ORF in Assemblies 19, 20 and 21; Hog1p-induced; Gcn4p-regulated; protein level decreased in stationary phase cultures
orf19.7021	0.443609	0.0218888	GPH1	orf6.7947|IPF2357.1|Contig4-3091_0021|Contig4-3091_0022|Contig4-3091_0024|CA5206|CaJ7.0111|CaO19.7021	Putative glycogen phosphorylase; gene regulated by Ssk1p, Mig1p, and Tup1p; fluconazole-induced; localizes to cell surface of hyphal cells, but not yeast-form cells; S. cerevisiae Gph1p is a stress-regulated protein of glycogen metabolism
orf19.3941	0.432237	0.000482162	URA7	orf19.11423|IPF23233.1|IPF10815.2|Contig4-2929_0016|orf6.3228|CA1635|CaO19.3941|CaO19.11423	Predicted ORF in Assemblies 19, 20 and 21; flucytosine induced; protein detected by mass spec in exponential and stationary phase cultures
orf19.413	0.420218	0.00339428		orf19.8043|orf6.2094|IPF4902.1|IPF29827.1|Contig4-3004_0013|CA0897|CaO19.413|IPF4902	Transcription is positively regulated by Sfu1p
orf19.6081	0.418965	0.00178573	PHR2	orf19.13500|orf6.6260|IPF4604.2|IPF14612.3|Contig4-2998_0022|orf6.1067|CA3867|CaO19.6081	Glycosidase; role in cell wall structure; may act on beta-1,3-glucan prior to beta-1,6-glucan linkage; role in vaginal but not systemic virulence (low pH, not neutral); low pH, high iron, fluconazole induced; Rim101p-downregulated at pH 8
orf19.1097	0.408247	0.0021497	ALS2	orf19.8699|orf19.8700|orf19.9669|orf19.9670|orf6.1311|ALS4|IPF26222.1|IPF26230.1|IPF15450.3|IPF10205.2|IPF25194.1|IPF25217.1|IPF18994.1|IPF16055.3|orf6.3000|orf6.2999|CA1473|CA1471|CA0412|CA0413|orf19.1098|orf19.2121|orf19.2122|ALS12|ALS2.5f	ALS family protein; role in adhesion, biofilm formation, germ tube induction; expressed at infection of human buccal epithelial cells; putative GPI-anchor; induced by ketoconazole, low iron and at cell wall regeneration; regulated by Sfu1p
orf19.3803	0.40661	0.0125703	MNN22	orf19.11284|IPF10363.2|IPF10361.3|Contig4-2432_0003|orf6.1866|orf6.264|CA0752|MNN24|CaO19.3803	Protein described as similar to Golgi alpha-1,2-mannosyltransferase; regulated by Tsa1p, Tsa1Bp in minimal media at 37 deg; Hog1p-induced; induced by nitric oxide; downregulated in core stress response
orf19.2121	0.392194	0.0040688		orf19.9669|orf6.1311|ALS4|IPF25194.1|IPF25217.1|IPF18994.1|IPF16055.3|CA0412|ALS12.53eoc	Predicted ORF from Assembly 19; merged with orf19.1097 in Assembly 20
orf19.3746	0.386622	0.0144832	IFC1	orf19.11233|IPF23519.1|IPF4732.2|IPF4737.2|OPT2|Contig4-2422_0002|orf6.5478|CA3257|CA3258|CaO19.11231|OPT22|CaO19.3746|IFC2|orf6.5476	Oligopeptide transporter; transcriptionally induced upon phagocytosis by macrophage; macrophage/pseudohyphal-repressed after 16h; fluconazole-induced; virulence-group-correlated expression; fungal-specific (no human or murine homolog)
orf19.2721	0.383521	0.000112783		orf19.10236|IPF6404.2|IPF29006.1|Contig4-1801_0005|Contig4-2673_0012|orf6.2698|orf6.676|CA0150|CaO19.2721|CDC123	Predicted ORF in Assemblies 19, 20 and 21
orf19.4555	0.379482	0.0265364	ALS4	IPF13009.2|IPF13010.2|IPF22626.1|IPF18130.1|ALS4.3f|Contig4-2046_0006|Contig4-2931_0006|orf6.3075|CA1527|CA1528|CA5173|orf19.4556|orf19.4610.1|ALS4.5f	ALS family protein; role in adhesion and wild-type germ tube induction; growth and temperature regulated; expressed during infection of human buccal epithelial cells; down-regulated upon vaginal contact; putative GPI-anchored
orf19.1093	0.373758	0.0219063	FLO8	orf19.8695|IPF26221.1|IPF10214.2|orf6.3004|CA1476|CaO19.1093|IPF10214	Transcription factor; required for wild-type hyphal formation; regulates hyphal gene expression; required for virulence in mouse systemic infection; binds Efg1p; binds Mss11p via LisH motif; has LUFS domain; ortholog of S. cerevisiae Flo8p
orf19.4279	0.361002	0.0366196	MNN1	orf19.11755|orf6.3107|IPF17287.3|IPF8746.2|Contig4-2872_0014|orf6.5207|CA1548|CaO19.4279|IPF8746	Putative alpha-1,3-mannosyltransferase, a component of mannosyltransferase complex; transcription is negatively regulated by Rim101p; transcription is elevated in chk1 and nik1 homozygous null mutants, but not in the sln1 null mutant
orf19.1964	0.359048	0.0338004		orf19.9520|IPF25368.1|IPF6298.2|IPF6298|Contig4-2813_0008|orf6.5040|CA2947|AQR1|CaO19.1964|CaO19.9520	Putative protein of unknown function; downregulated upon fluphenazine treatment; upregulated upon benomyl treatment and in an RHE model; regulated by Nrg1p, Tup1p
orf19.2060	0.352126	0.0138193	SOD5	orf19.9607|PGA3|orf6.7495|IPF1222|IPF25296.1|IPF1222.2|Contig4-3065_0005|CA4836|CaO19.2060|SOD31|CaO19.9607	Copper- and zinc-containing superoxide dismutase; protective role against oxidative stress; induced by neutrophil contact, hyphal growth, caspofungin, osmotic or oxidative stress; member of a gene family including SOD1, SOD4, SOD5, and SOD6
orf19.6287	0.323309	0.00325614	AAT21	orf19.13666|IPF20853.1|IPF9326.2|Contig4-2560_0002|orf6.5437|CA3227|CaO19.6287|AAT2|CaO19.13666	Predicted ORF in Assemblies 19, 20 and 21; Gcn4p-regulated; protein detected by mass spec in exponential and stationary phase cultures
orf19.7350	0.284472	0.0114634		IPF7109.2|Contig4-2885_0005|orf6.8510|CA5650|CaO19.7350|IPF7109	Soluble protein in hyphae; fluconazole-induced; mRNA abundance is elevated in a cyr1 or ras1 null mutant and decreased mRNA abundance in an efg1 null mutant; regulated by Nrg1p, Tup1p, Tbf1p, Ssn6p
orf19.6202	0.280767	0.0136576	RBT4	orf19.13583|orf6.537|YJL79|PRY4|IPF8153.3|IPF27769.1|Contig4-2876_0017|orf6.5422|CA0104|IPF8153.2	Similar to plant pathogenesis-related proteins; required for virulence in mouse systemic, rabbit corneal infections; not required for filamentation; secretion signal; TUP1/RFG1/SSN6/HOG1 repressed; serum, hyphal, pheromone, alkaline-induced
orf19.4716	0.273359	0.0428187	GDH3	IPF8236.1|Contig4-2812_0004|orf6.3152|CA1579|CaO19.4716|GDH1	Protein described as similar to NADP-glutamate dehydrogenase; hyphal downregulated expression; transcription is regulated by Nrg1p, Plc1p; downregulated by Efg1p; upregulated by Rim101p at pH 8; ciclopirox olamine induced
orf19.4082	0.261231	0.0118414	DDR48	orf19.11563|orf6.6854|DDR99|IPF23163.1|IPF2075.1|Contig4-3095_0012|CA4336|CaO19.11563|CaO19.4082	Immunogenic stress-associated protein; regulated by filamentous growth pathways; induced by benomyl, caspofungin, or in azole-resistant strain; Hog1p, farnesol, alkaline downregulated; similar to S. cerevisiae Ddr48p
orf19.5620	0.238965	0.0386666		orf19.13065|IPF18418.1|IPF12436.3|Contig4-2504_0003|orf6.212|orf6.4779|CA2756|PHZ1|CaO19.5620|IPF18418	Predicted ORF in Assemblies 19, 20 and 21; regulated by Gcn4p; induced in response to amino acid starvation (3-aminotriazole treatment); increased transcription is observed upon benomyl treatment or in an azole-resistant strain that overexpresses MDR1
orf19.4749	0.235705	0.00168278		orf19.12211|IPF22427.1|IPF13921.2|Contig4-2151_0005|Contig4-2151_0007|Contig4-2151_0008|orf6.4019|CA2211|CaO19.4749|IPF13921	Predicted ORF in Assemblies 19, 20 and 21; hyphal-induced expression, regulated by Cyr1p, Ras1p, Efg1p
orf19.4477	0.235552	0.0425057	CSH1	orf6.4310|IFD4|IPF22774.1|IPF14374.2|CA2416|CAgp38|CaO19.11957|CaO19.4477	Member of aldo-keto reductase family, similar to aryl alcohol dehydrogenases; role in adhesion to fibronectin, cell surface hydrophobicity; regulated by temperature, growth phase, benomyl, macrophage interaction; azole resistance associated
orf19.3718	0.206641	0.0433381		orf19.11202|IPF23532.1|IPF18818.2|orf6.2195	Gene fragment (probable assembly 19 error); 5' end of OPT4-2 allele (oligopeptide transporter); fungal-specific (no human or murine homolog); transcriptionally induced upon phagocytosis by macrophage; merged with orf19.176 in Assembly 20
orf19.176	0.192898	0.00167816	OPT4	orf19.11202|orf19.7809|IPF27144.1|IPF18680.1|IPF12066.2|IPF23532.1|IPF18818.2|orf6.2912|orf6.1364|orf6.4217|orf6.5478|orf6.2195|CA0442|orf19.3718|orf19.2292|OPT232|CaO19.176|CaO19.7809	Oligopeptide transporter; detected at germ tube plasma membrane by mass spectrometry; transcriptionally induced upon phagocytosis by macrophage; fungal-specific (no human or murine homolog); merged with orf19.2292 in Assembly 20
orf19.7053	0.177863	0.00889259	GAC1	IPF461.2|orf6.8500|CA5641|CaJ7.0080|CaO19.7053|CaO19_7053|CaJ7_0080	Protein described as similar to regulatory subunit of serine/threonine phosphoprotein phosphatase 1; fluconazole-induced; caspofungin repressed; transcriptionally activated by Mnl1p under weak acid stress; regulated by Nrg1p, Tup1p
orf19.2355	0.160756	0.00170729	ALS10	orf19.9891|IPF24952.1|IPF12997.2|orf6.2760|ALS2|CA0448|ALS3|CaO19.2355|orf6.1377	ALS family protein; ALS family includes cell-surface glycoproteins, some with adhesin function; putative GPI-anchor; filament induced; regulated by Nrg1p, Rfg1p, Tup1p; merged with orf19.1816 in Assembly 20
orf19.1206	0.150592	0.000986485	FET35	orf19.8797|orf6.2939|IPF26138.1|IPF12467.2|FET34.3eoc|CA1431|CaO19.8797|CaO19.1206	Protein with similarity to multicopper ferroxidase; transcriptionally activated in low iron conditions; transcription is repressed by Sfu1p and activated under weak acid stress by Mnl1p; merged with orf19.4215 in Assembly 20
orf19.3384	0.124814	3.01681e-06		orf19.10892|IPF23893.1|IPF16136.1|Contig4-2768_0006|orf6.2929|RBT1|CaO19.10892|HWP98|CaO19.3384	Putative cell wall protein with C-terminal similarity to Hwp1p; alkaline upregulated; alpha factor induced; Rim101p-regulated; merged with orf19.1327 in Assembly 20
orf19.2292	0.123082	0.006494		IPF12066.2|orf6.1364|orf6.4217|orf6.5478|CA0442|OPT4|CaO19.2292|OPT231|IFC4	Oligopeptide transporter; transcriptionally induced upon phagocytosis by macrophage; fungal-specific (no human or murine homolog); merged with orf19.176 in Assembly 20
orf19.1321	0.0833136	0.00767511	HWP1	orf19.8901|ECE2|IPF26012.1|IPF12916.1|Contig4-2436_0002|orf6.4883|CA2825|CaO19.8901|CaO19.1321	Hyphal cell wall protein; covalently crosslinked to epithelial cells by host transglutaminase; opaque- and a-specific, alpha-factor induced; at MTLa side of conjugation tube; assessment of virulence role complicated by URA3 effects
orf19.4215	0.0788688	0.0120804	FET34	orf19.11691|orf19.8797|orf6.5006|orf6.2939|IPF26138.1|IPF12467.2|IPF23068.1|IPF17039.1|FET5|FET34.3eoc|CA1431|CA2920|orf19.1206|FET35|FET5.5eoc	Protein similar to multicopper ferroxidase; expression greater in low iron and reduced in a fluconazole-resistant isolate; downregulated by Sfu1p, Hog1p; alkaline upregulated by Rim101p; ciclopirox olamine induced
orf19.5760	0.0665949	0.000771636	IHD1	orf19.13183|PGA36|IPF21466.1|IPF10662.2|Contig4-2056_0002|orf6.6198|orf6.6197|YMR317|CA3827|orf19.5761|CaO19.13183|CaO19.5760|IPF10662	Putative GPI-anchored protein of unknown function; alkaline upregulated; greater transcription in hyphal form than yeast form; regulated by Nrg1p, Rfg1p, Tup1p; regulated by Tsa1p, Tsa1Bp in minimal media at 37; not essential for viability
orf19.1816	0.0417242	0.000949281	ALS3	orf19.9891|orf19.9379|ALS8|IPF25511.1|IPF12561.3|IPF24952.1|IPF12997.2|orf6.2760|ALS2|ALS3-1|CA0591|CA0448|orf19.2355|ALS10|ALS3.5eoc|orf6.1614|IPF12561.2	Adhesin; ALS family; role in epithelial adhesion, endothelial invasiveness; allelic variation in adhesiveness; immunoprotective in mice; predicted GPI-anchor cell wall protein; macrophage, hyphal induced, pH, Nrg1p, Rfg1p, Tup1p regulated
orf19.1327	0.0403921	0.00254826	RBT1	orf19.8907|orf19.10892|ECE99|IPF19252.2|IPF15385.2|IPF23893.1|IPF16136.1|Contig4-2768_0006|orf6.4889|orf6.489|orf6.2929|CA2830|orf19.3384|CaO19.1327|RBT99	Putative cell wall protein with similarity to Hwp1p, required for virulence; predicted to be cell-wall attached and glycosylated; Tup1p repressed; serum, hyphal and alkaline induced; farnesol, alpha factor induced; Rfg1p-, Rim101p-regulated
orf19.3374	0.0191741	0.00295022	ECE1	orf19.10882|IPF23894.1|IPF14152.1|Contig4-2242_0004|orf6.2886|CA1402|CaO19.10882|CaO19.3374	Protein comprising eight 34-residue repeats; hyphal-specific expression increases with extent of elongation of the cell; regulated by Rfg1p, Nrg1p, Tup1p, Cph1p, Efg1p, Hog1p, farnesol, phagocytosis; may contribute to biofilm formation

## Sheet: mfg1_30C
Experiment	mfg1 mutant yeast 30C
Time	0h
Systematic	Normalized	t-test P-value	Common	Synonyms	Description
orf19.4459	3.99146	0.00998596		orf19.11939|IPF22769.1|IPF11849.2|Contig4-2719_0006|Contig4-2719_0007|orf6.2833|YNL234W|CA1365|CaO19.4459|CaO19.11939|IPF11849	Predicted ORF in Assemblies 19, 20 and 21; similar to S. cerevisiae Ynl234wp, which is a putative heme-binding stress-related protein; transposon mutation affects filamentous growth
orf19.740	3.80365	0.0234704	HAP41	orf19.8359|IPF26555.1|IPF13319.2|Contig4-2600_0002|orf6.2411|CA1088|CaO19.740|CaO19.8359|IPF13319	Predicted ORF in Assemblies 19, 20 and 21; not required for response to low iron; possibly spurious ORF (Annotation Working Group prediction); transcriptionally activated by Mnl1p under weak acid stress
orf19.3370	2.70975	0.00339743	DOT4	orf19.10878|orf6.2580|IPF17685.3|IPF15624.1|Contig4-1346_0001|Contig4-1346_0002|Contig4-2147_0001|Contig4-2147_0003|orf6.2581|orf6.2890|CA1406|CaO19.3370|UBP10	Protein similar to ubiquitin C-terminal hydrolase; localizes to cell surface of hyphal cells, but not yeast-form cells; repressed upon high-level peroxide stress
orf19.5507	2.59924	0.0415411	ENP1	IPF2587.2|Contig4-3088_0045|orf6.4355|CA2449|CaJ7.0424|CaO19.5507|CaJ7_0424|CaO19_5507	Protein similar to S. cerevisiae Enp1p; transposon mutation affects filamentous growth; decreased expression in response to prostaglandins
orf19.2688	2.57707	0.0153677	NAN1	orf19.10203|IPF24577.1|IPF20112.1|Contig4-2865_0003|orf6.4798|CA2772|CaO19.10203|CaO19.2688|IPF20112	Predicted ORF in Assemblies 19, 20 and 21; physically interacts with TAP-tagged Nop1p
orf19.7585	2.5466	0.000270347	INO1	IPF904.1|Contig4-3105_0074|orf6.8933|CA5986|CaO19.7585	Inositol-1-phosphate synthase; enzyme of inositol biosynthesis; antigenic in human; repressed by farnesol (in biofilm) or caspofungin; regulated during planktonic growth; upstream inositol/choline regulatory element; glycosylation predicted
orf19.4698	2.53497	0.021259	PTC8	orf19.12168|IPF22595.1|IPF15977.2|orf6.1685|CA0641|CaO19.12168|DHP99|CaO19.4698|IPF15977	Predicted type 2C protein phosphatase, serine/threonine-specific; required for hyphal growth; induced under stress
orf19.3665	2.51114	4.19293e-05		orf19.11149|IPF23602.1|IPF12040.2|Contig4-3059_0003|orf6.6476|CA4035|SET6|CaO19.3665|CaO19.11149|IPF12040	Predicted ORF in Assemblies 19, 20 and 21
orf19.3089	2.43537	0.00172575		orf19.10601|IPF24196.1|IPF1732.1|Contig4-2877_0015|orf6.3732|CA2009|CaO19.10601|CaO19.3089|IPF1732	Predicted ORF in Assemblies 19, 20 and 21
orf19.6948	2.42923	2.03223e-05	CCC1	orf19.14210|IPF20199.1|IPF5909.2|Contig4-3085_0020|orf6.7334|CA4713|CaO19.14210|CaO19.6948	Protein described as predicted manganese transporter; alkaline downregulated; shows colony morphology-related gene regulation by Ssn6p; repressed by nitric oxide
orf19.4600	2.39597	9.80712e-05		orf19.12069|IPF22627.1|IPF983.1|Contig4-3104_0071|orf6.7899|CA5161|CaO19.4600|CaO19.12069|IPF983	Predicted ORF in Assemblies 19, 20 and 21
orf19.1721	2.3349	0.00298509	NCE103	orf19.9289|IPF25642.1|IPF8405.1|Contig4-2981_0017|orf6.4839|CA2796|CaO19.9289|CaO19.1721|IPF8405	Carbonic anhydrase involved in the conversion of carbon dioxide to bicarbonate; essential for pathogenesis in host niches with limited CO2, wild-type white-opaque switching; biofilm induced; activated by Mnl1p under weak acid stress
orf19.5025	2.321	0.00980054	MET3	orf19.12492|orf6.7984|IPF22255.1|IPF3022.1|Contig4-3075_0019|Contig4-3075_0020|CA5238|CaO19.5025|CaO19.12492	Putative ATP sulfurlyase of sulfate assimilation; repressed by Met or Cys, Sfu1p, or in fluconazole-resistant isolate; strongly induced on biofilm formation, even in presence of Met and Cys; Hog1p-, caspofungin-, possibly adherence-induced
orf19.59	2.31692	4.31257e-05	REI1	orf19.7720|IPF12828.3|IPF18447.1|orf6.4547|orf6.73|CA2592|CaO19.59|IPF18447	Predicted ORF in Assemblies 19, 20 and 21; decreased expression in response to prostaglandins
orf19.4342	2.31262	0.00783619		orf19.11817|IPF11357.2|IPF14623.2|Contig4-2344_0008|orf6.1848|orf6.2799|CA1344|CaO19.4342|IPF14623	Predicted ORF in Assemblies 19, 20 and 21
orf19.4582	2.2905	0.0038508		orf19.12051|IPF22629.1|IPF1018.1|Contig4-3104_0032|orf6.7881|CA5145|SKI6|CaO19.4582|CaO19.12051	Predicted ORF in Assemblies 19, 20 and 21
orf19.4688	2.28079	0.00133528	DAG7	orf19.12157|IPF14119.1|IPF28307.1|Contig4-2733_0007|orf6.1768|CA0689|CaO19.4688|CaO19.12157|IPF14119	Predicted ORF in Assemblies 19, 20 and 21; mutation confers hypersensitivity to toxic ergosterol analog; a-specific transcription; alpha-factor induced
orf19.5500	2.27159	0.0065558	MAK16	orf19.12955|IPF21671.1|IPF5859.3|Contig4-1385_0002|Contig4-1385_0003|orf6.4657|CA2670|CaO19.12955|CaO19.5500|IPF5859.2	Predicted ORF in Assemblies 19, 20 and 21; decreased expression in response to prostaglandins
orf19.2947	2.24637	0.019546	SNZ1	orf19.10464|IPF24330.1|IPF10248.2|Contig4-2682_0003|orf6.6669|CA4184|SNZ99|CaO19.2947|CaO19.10464	Detected in stationary phase cultures; soluble in hyphae; induced on yeast to hyphal switch, in response to 3-aminotriazole, or in azole-resistant strain overexpressing MDR1; regulated by Gcn4p, macrophage; no human/murine homolog
orf19.3630	2.23948	0.0495276	RRP8	orf19.11113|IPF23665.1|IPF10837.2|orf6.2709|CA1277|CaO19.11113|CaO19.3630|IPF10837	Predicted ORF in Assemblies 19, 20 and 21; induced upon biofilm formation
orf19.1300	2.23862	3.74185e-05		orf19.8880|IPF13552.2|IPF29494.1|Contig4-2781_0017|orf6.1387|CA0453|CaO19.1300|IPF13552	Predicted ORF in Assemblies 19, 20 and 21
orf19.5732	2.22078	0.0366488	NOG2	orf19.13154|orf19.13155|IPF21470.1|IPF10785.2|Contig4-3044_0008|Contig4-3044_0009|orf6.4911|orf6.4912|CA2847|orf19.5733|CA2848|IPF10785.exon2|IPF10786.2|IPF10785.exon1	Predicted ORF in Assemblies 19, 20 and 21; decreased expression in response to prostaglandins
orf19.1222	2.21891	0.0386616		IPF15693.2|Contig4-2844_0012|orf6.850|CA0204|CaO19.1222|IKI3	Predicted ORF from Assembly 19; merged with orf19.2631 in Assembly 20
orf19.1306	2.2004	0.0355768		orf19.8886|IPF26019.1|IPF6679.1|orf6.2774|CA1326|CaO19.8886|CaO19.1306|IPF6679	Predicted ORF in Assemblies 19, 20 and 21
orf19.1855	2.19696	0.0250582		orf19.9413|orf6.3324|IPF25469.1|IPF19985.1|SEO2|SEO1|Contig4-3021_0009|Contig4-3021_0010|orf6.4008|orf6.5622|CA3373|CaO19.1855|SEO11|CaO19.9413	Predicted membrane transporter, member of the anion:cation symporter (ACS) family, major facilitator superfamily (MFS); Gcn4p-regulated; flucytosine induced; ketoconazole-repressed; oxidative stress-induced via Cap1p
orf19.4159	2.16112	0.00476657		orf19.11635|IPF23093.1|IPF15660.2|Contig4-1990_0003|orf6.2623|CA1226|CaO19.4159|CaO19.11635|IPF15660	Predicted ORF in Assemblies 19, 20 and 21
orf19.254	2.15761	0.00569968		orf19.7886|IPF18861.2|IPF16370.2|Contig4-2723_0001|orf6.1987|orf6.691|CA0152|CaO19.254|IPF16368.3f	Predicted ORF in Assemblies 19, 20 and 21; Hog1p-downregulated
orf19.3798	2.13348	0.000337323		orf19.11279|IPF23464.1|IPF14248.2|Contig4-3100_0008|orf6.2916|CA1422|CaO19.3798|TRM8|CaO19.11279|IPF14248	Predicted ORF in Assemblies 19, 20 and 21
orf19.1923	2.12556	0.0113817	RRN3	orf19.9479|IPF19884.2|IPF19708.1|orf6.1957|CA0810|CaO19.1923|CaO19.9479	Predicted ORF in Assemblies 19, 20 and 21; caspofungin induced, flucytosine repressed; downregulated in core stress response; decreased expression in response to prostaglandins
orf19.4933	2.11266	0.0116131	FAD3	orf19.12399|IPF22268.1|IPF12942.2|Contig4-2611_0011|orf6.5913|CA3604|CaO19.12399|ODE2|CaO19.4933|IPF12942	Omega-3 fatty acid desaturase, involved in production of alpha-linolenic acid, which is a major component of membranes; caspofungin induced; Plc1p-regulated; shows colony morphology-related gene regulation by Ssn6p
orf19.4593	2.11096	0.00206317	RGA2	orf19.12062|IPF22680.1|IPF1000.1|Contig4-3104_0056|orf6.7892|CA5154|CaO19.4593|CaO19.12062	Putative GTPase-activating protein (GAP) for Rho-type GTPase Cdc42p; involved in cell signaling pathways that control cell polarity; similar to S. cerevisiae Rga2p; induced upon low-level peroxide stress
orf19.3539	2.11001	0.0140291		orf19.11023|IPF23732.1|IPF6431.2|Contig4-2990_0011|orf6.4285|CA2398|CaO19.11023|CaO19.3539|IPF6431	Predicted ORF in Assemblies 19, 20 and 21
orf19.3777	2.10812	0.0281131		orf19.11258|IPF13432.2|IPF15216.2|orf6.1134|orf6.2593|CA0329|CaO19.3777|IMG2	Predicted ORF in Assemblies 19, 20 and 21
orf19.4681	2.07079	0.000763568	RAT1	orf19.12150|IPF22542.1|IPF7491.1|Contig4-2949_0009|Contig4-2949_0010|orf6.5455|CA3242|CaO19.12150|CaO19.4681	5'-->3' exoribonuclease; similar to S. cerevisiae nuclear exoribonuclease Rat1p; suppresses S. cerevisiae kem1 mutant slow growth, mating defect, and haploid invasive growth defect
orf19.2717	2.06815	0.000638427	SAS10	orf19.10232|IPF24603.1|IPF6410.2|Contig4-2673_0009|orf6.2702|CA1274|CaO19.2717	Predicted ORF in Assemblies 19, 20 and 21; mutation confers resistance to 5-fluorocytosine (5-FC); repressed upon high-level peroxide stress
orf19.4190	2.05525	0.0158195		orf19.11667|IPF23106.1|IPF7999.1|Contig4-2846_0003|orf6.3647|CA1940|PAM18|CaO19.11667|CaO19.4190|IPF7999	Predicted ORF in Assemblies 19, 20 and 21
orf19.5645	2.04717	0.0005574	MET15	orf19.13090|MET25|IPF21534.1|IPF12125.2|orf6.4514|CA2565|CaO19.13090|CaO19.5645	O-acetylhomoserine O-acetylserine sulfhydrylase; involved in sulfur amino acid biosynthesis; immunogenic; Hog1p, biofilm, possibly adherence-induced; brown colony color of homozygous mutant in Pb(2+) medium is visual selection marker
orf19.4078	2.04238	0.0106032		orf19.11559|IPF2068.3|IPF28525.1|Contig4-2072_0004|orf6.3202|CA1618|RRP45|CaO19.4078|IPF2068.2	Predicted ORF in Assemblies 19, 20 and 21
orf19.5407	2.04161	0.000360457	SOF1	orf19.12862|IPF21734.1|IPF1095.1|Contig4-3071_0003|orf6.8643|CA5765|CaO19.12862|CaO19.5407	Predicted ORF in Assemblies 19, 20 and 21; transcription is upregulated in both intermediate and mature biofilms
orf19.2287	2.01464	0.0316673	RPA12	orf19.9827|IPF25090.1|IPF9993.2|Contig4-3049_0004|orf6.2447|CA1115|CaO19.9827|CaO19.2287	Protein described as DNA-directed RNA polymerase I; induced upon adherence to polystyrene
orf19.4273	2.01104	0.0408821		orf19.11749|IPF22931.1|IPF16549.2|Contig4-2872_0001|orf6.3484|CA1819|CaO19.11749|CaO19.4273|IPF16549	Predicted ORF in Assemblies 19, 20 and 21
orf19.1673	2.00996	0.0136672	PPT1	orf19.9242|orf6.1084|IPF25613.1|IPF14222.3|Contig4-2335_0002|CA0298|CaO19.1673|IPF14222.2	Protein described as serine/threonine phosphatase; transcriptionally regulated by iron; expression greater in high iron
orf19.4697	2.00264	2.86726e-05	MDN1	orf19.12167|IPF22610.1|IPF11189.3|Contig4-1657_0002|Contig4-1657_0003|Contig4-2496_0003|orf6.1058|orf6.1684|orf6.1709|orf6.759|CA0283|CaO19.4697|IPF18034|IPF18034.2	Protein induced during the mating process
orf19.1250	1.99728	0.0122647		orf19.8834|IPF26082.1|IPF16428.2|orf6.3009|CA1479|CaO19.1250|CaO19.8834|IPF16428	Predicted ORF in Assemblies 19, 20 and 21
orf19.5905	1.98744	0.00168201		orf19.13326|IPF21349.1|IPF1882.1|Contig4-2874_0012|orf6.9132|CA6140|CaO19.13326|CaO19.5905|IPF1882	Predicted ORF in Assemblies 19, 20 and 21; induced upon biofilm formation
orf19.2917	1.98611	0.0134965		orf19.10434|IPF24432.1|IPF16748.2|Contig4-2802_0011|orf6.3461|CA1803|CaO19.10434|CaO19.2917|IPF16748	Putative protein of unknown function; heterozygous null mutant exhibits resistance to parnafungin in the C. albicans fitness test; predicted ORF in Assemblies 19, 20 and 21
orf19.3778	1.97772	0.0162477		orf19.11259|orf19.11260|IPF23474.1|IPF23478.1|IPF15219.2|IPF15217.2|Contig4-2648_0005|Contig4-2648_0007|orf6.2592|orf6.1133|orf6.1132|CA0328|CA0327|orf19.3779|IPF15217.3f	Predicted ORF in Assemblies 19, 20 and 21; mutation confers hypersensitivity to 5-fluorocytosine (5-FC), 5-fluorouracil (5-FU); downregulated in core stress response; decreased expression in response to prostaglandins
orf19.4191	1.97686	0.00803792	RLP24	orf19.11668|IPF23102.1|IPF7998.1|Contig4-2846_0001|orf6.3648|CA1941|CaO19.4191|CaO19.11668|IPF7998	Predicted ORF in Assemblies 19, 20 and 21; essential; S. cerevisiae ortholog is essential; heterozygous mutation confers hypersensitivity to 5-fluorocytosine (5-FC), 5-fluorouracil (5-FU), and tubercidin (7-deazaadenosine)
orf19.4167	1.96288	0.0153572		orf19.11643|IPF6192.2|IPF17807.3|orf6.125|orf6.6061|CA3717|CaO19.4167|IPF6192	Predicted ORF in Assemblies 19, 20 and 21
orf19.6741	1.9579	0.0338112		orf19.14033|IPF20373.1|IPF3506.2|Contig4-3006_0020|orf6.8890|CA5953|CaO19.6741|CaO19.14033|IPF3506	Predicted ORF in Assemblies 19, 20 and 21; regulated by Nrg1p, Tup1p
orf19.25	1.95541	0.000717817		orf19.7696|IPF27221.1|IPF3857.1|Contig4-3047_0024|orf6.5919|CA3608|CaO19.25|TRM10|CaO19.7696|IPF3857	Predicted ORF in Assemblies 19, 20 and 21
orf19.5299	1.9539	0.0433691	ECM1	orf19.12758|IPF21887.1|IPF8538.2|Contig4-2961_0022|orf6.3935|CA2158|CaO19.5299	Decreased mRNA abundance observed in cyr1 homozygous mutant hyphae; induced by heavy metal (cadmium) stress; Hog1p regulated
orf19.3287	1.94715	0.0139688	BUD22	orf19.10797|IPF24049.1|IPF16944.2|Contig4-1655_0004|orf6.8287|CA5474|IPF16944.3eoc	Predicted ORF in Assemblies 19, 20 and 21; downregulated during core stress response; decreased expression in response to prostaglandins
orf19.4176	1.92185	0.00873588		orf19.11652|IPF23099.1|IPF6175.1|Contig4-2228_0001|orf6.6070|CA3726|MRPS17|CaO19.4176|CaO19.11652|IPF6175	Predicted ORF in Assemblies 19, 20 and 21
orf19.385	1.88561	8.66898e-05	GCV2	orf19.8015|IPF19789.1|IPF6369.3|orf6.246|orf6.6279|CA3883|CaO19.385	Putative protein of glycine catabolism; downregulated by Efg1p; Hog1p-induced; upregulated by Rim101p at acid pH; transcription is activated in the presence of elevated CO2; protein detected by mass spec in stationary phase cultures
orf19.3406	1.87695	0.00659028		orf19.10909|IPF23830.1|IPF9898.2|Contig4-2923_0025|orf6.4325|CA2427|CaO19.3406|CaO19.10909|IPF9898	Predicted ORF in Assemblies 19, 20 and 21; member of conserved Mcm1p regulon
orf19.6014	1.87628	0.0491572	RRS1	orf19.13435|IPF13845.2|IPF5085.1|orf6.1432|orf6.5094|CA2992|CaO19.6014	Predicted ORF in Assemblies 19, 20 and 21; mutation confers hypersensitivity to 5-fluorocytosine (5-FC), 5-fluorouracil (5-FU), and tubercidin (7-deazaadenosine)
orf19.661	1.87445	0.00418809	KRR1	orf19.8277|IPF3997.3|IPF4000.2|Contig4-2788_0008|orf6.254|orf6.6554|CA4096|CaO19.661	Decreased transcription is observed upon benomyl treatment or in an azole-resistant strain that overexpresses MDR1; induced upon biofilm formation
orf19.3797	1.87205	3.0965e-05		orf19.11278|IPF14249.2|IPF6901.3|Contig4-2569_0002|orf6.2915|orf6.3070|CA1421|MRPL11|CaO19.3797	Predicted ORF in Assemblies 19, 20 and 21
orf19.1404	1.87135	9.79549e-05		orf19.8982|IPF25946.1|IPF11588.2|Contig4-2113_0003|orf6.5357|CA3176|CaO19.1404|DUS1|CaO19.8982|IPF11588	Predicted ORF in Assemblies 19, 20 and 21
orf19.7398	1.86909	0.0416643		IPF3309.1|orf6.8558|CA5696|IPF3309.3eoc	Predicted ORF in Assemblies 19, 20 and 21; decreased expression in response to prostaglandins
orf19.2711	1.84994	0.00207434		orf19.10226|IPF24584.1|IPF16752.2|Contig4-2190_0002|orf6.2727|CA1291|CaO19.10226|ELP2|CaO19.2711|IPF16752	Predicted ORF in Assemblies 19, 20 and 21; downregulated in core stress response
orf19.563	1.84701	0.00280192	RRP15	Contig4-3095_0042|orf6.367|CaO19.563|CA0057|IPF3767|IPF3767.1	Predicted ORF in Assemblies 19, 20 and 21; decreased expression in response to prostaglandins
orf19.3840	1.8402	0.0101177		orf19.11321|IPF23489.1|IPF4087.1|Contig4-3060_0022|orf6.7535|CA4864|CaO19.11321|CaO19.3840|IPF4087	Predicted ORF in Assemblies 19, 20 and 21
orf19.3774	1.83834	0.000109556	PPG1	orf19.11256|IPF18739.1|IPF15402.2|Contig4-2542_0004|Contig4-2542_0005|orf6.2291|orf6.2595|CA1207|CaO19.3774	Putative protein phosphatase of the Type 2A-related family (serine/threonine-specific), similar to S. cerevisiae Ppg1p
orf19.2712	1.82872	0.0266251	HCA4	orf19.10227|IPF24582.1|IPF6418.1|Contig4-2673_0001|orf6.2728|CaO19.2712|CaO19.10227|CA1293	Putative role in regulation of biogenesis of the cell wall; upregulated in biofilm
orf19.2942	1.82332	0.0222742	DIP5	orf19.10459|orf19.10460|IPF24319.1|IPF24337.1|IPF8123.2|IPF10236.2|DIP51|Contig4-2841_0016|orf6.4006|orf6.4007|CA2203|CA2204|orf19.2943|DIP52|DIP51.3f	Putative permease for dicarboxylic amino acids; mutation confers hypersensitivity to toxic ergosterol analog; transcriptionally induced upon phagocytosis by macrophage; Gcn4p-regulated; upregulated by Rim101p at pH 8
orf19.1303	1.81832	0.0108368		orf19.8883|IPF19627.2|IPF19626.1|Contig4-2781_0004|Contig4-2781_0005|Contig4-2781_0008|orf6.1384|orf6.2777|CA1329|CaO19.1303|MRF1|MRF2	Predicted ORF in Assemblies 19, 20 and 21
orf19.1249	1.8179	0.000970168		orf19.8833|IPF26083.1|IPF15577.2|Contig4-1942_0005|orf6.3010|CA1480|CaO19.8833|HIS6|CaO19.1249	Predicted ORF in Assemblies 19, 20 and 21
orf19.3393	1.81641	0.000191405		orf19.10896|IPF23819.1|IPF9477.2|Contig4-2516_0008|orf6.1808|CA0715|DBP9|CaO19.10896|CaO19.3393	Putative DEAD-box helicase
orf19.1528	1.81577	0.00890762		orf19.9104|IPF14920.2|IPF29413.1|Contig4-2467_0004|Contig4-2467_0005|orf6.1857|CA0745|MTF1|CaO19.9104|CaO19.1528	Predicted ORF in Assemblies 19, 20 and 21
orf19.6230	1.8084	0.0397459		orf19.13610|IPF14568.2|IPF18936.2|Contig4-2906_0018|orf6.5126|CA3010|CaO19.6230|RAI1|CaO19.13610|IPF14568	Predicted ORF in Assemblies 19, 20 and 21
orf19.76	1.80758	0.00979268	SPB1	orf19.7727|IPF19691.1|IPF13820.3|Contig4-2587_0002|orf6.1369|orf6.267|CA0443|CaO19.76	Predicted ORF in Assemblies 19, 20 and 21; decreased expression in response to prostaglandins
orf19.5704	1.80302	0.00301564		orf19.13127|IPF17898.2|IPF8477.1|Contig4-2522_0007|orf6.151|orf6.4634|CA2655|CaO19.5704|IPF8477	Predicted ORF in Assemblies 19, 20 and 21
orf19.1486	1.79855	0.0331121		orf19.9061|IPF6011.2|IPF6010.3|Contig4-2638_0008|orf6.2256|CA1000|CaO19.9061|CaO19.1486|IPF6011	Predicted ORF in Assemblies 19, 20 and 21; possibly spurious ORF (Annotation Working Group prediction)
orf19.6862	1.79353	0.0012943		orf19.14152|IPF20266.1|IPF9829.1|Contig4-2844_0004|orf6.7011|CA4465|CaO19.6862|CaO19.14152|IPF9829	Predicted ORF in Assemblies 19, 20 and 21; mutation confers hypersensitivity to 5-fluorocytosine (5-FC), 5-fluorouracil (5-FU), and tubercidin (7-deazaadenosine)
orf19.4760	1.79327	0.00490897		orf19.12224|IPF18440.1|IPF10911.2|Contig4-2557_0004|orf6.179|orf6.4595|CA2629|CaO19.4760|IPF10911	Predicted ORF in Assemblies 19, 20 and 21
orf19.2775	1.79263	0.000381202	IDI1	orf19.12027|orf19.10291|IPF24623.1|IPF11947.2|IPF22675.1|IPF1053.1|Contig4-2553_0008|orf6.3090|orf6.6577|CA4116|orf19.4558|CaO19.10291|CaO19.2775|CA1538|IDI1.3eoc	Predicted ORF in Assemblies 19, 20 and 21
orf19.1566	1.78894	0.042509	UTP21	orf19.9139|IPF25737.1|IPF14782.2|Contig4-2110_0005|Contig4-2110_0006|orf6.6423|CA3990|CaO19.1566|CaO19.9139|IPF14782	Predicted ORF in Assemblies 19, 20 and 21; physically interacts with TAP-tagged Nop1p
orf19.3125	1.7874	0.00974883		orf19.10637|IPF12412|IPF24188.1|IPF12412.2|orf6.6920|CA4386|CaO19.3125|CaO19.10637	Protein not essential for viability
orf19.3831	1.78416	0.0366437		orf19.11312|IPF15931.3|IPF15929.1|Contig4-3060_0002|orf6.7526|CA4858|CaO19.11312|CaO19.3831|IPF15927.3f	Predicted ORF in Assemblies 19, 20 and 21
orf19.1772	1.78309	0.0254367		orf19.9341|IPF25546.1|IPF16267.2|Contig4-1808_0003|orf6.1678|CA0634|CaO19.1772|CaO19.9341|IPF16267	Predicted ORF in Assemblies 19, 20 and 21
orf19.1440	1.78187	0.033745		orf19.9015|IPF25887.1|IPF10568.1|Contig4-2265_0003|orf6.1052|CA0279|CaO19.1440|IPF10568	Predicted ORF in Assemblies 19, 20 and 21; possibly spurious ORF (Annotation Working Group prediction)
orf19.2720	1.77397	0.000238841		orf19.10235|IPF19188.2|IPF6406.2|Contig4-2673_0010|orf6.2699|orf6.675|CA1273|CCT4|CaO19.2720	Predicted ORF in Assemblies 19, 20 and 21
orf19.1091	1.77317	0.000174503		orf19.8692|IPF26223.1|IPF16935.2|orf6.1101|CA0309|CaO19.8692|NOP8|CaO19.1091|IPF16935	Putative ortholog of S. cerevisiae Nop8p, which is a nucleolar protein required for 60S ribosomal subunit biogenesis
orf19.7618	1.7706	0.0114402		IPF630.1|Contig4-3108_0080|orf6.8966|CA6016|CaO19.7618|IPF630	Predicted ORF in Assemblies 19, 20 and 21; Plc1p-regulated
orf19.5557	1.7679	0.000316804	MNN4-4	orf19.13003|orf6.4127|MNT4|IPF21572.1|IPF5376.2|Contig4-3002_0015|MNN4|CA2288|CaO19.13003|MNN45|CaO19.5557|IPF5376	Putative mannosyltransferase; transcription is upregulated in a mutant lacking the Ssk1p response regulator proteinor in a nik1 homozygous null mutant, but not in chk1 or sln1 null mutants; pheromone induced
orf19.603	1.76612	0.000136425	IMP4	orf19.8236|IPF26716.1|IPF3560.2|Contig4-2930_0013|orf6.4828|CA2791|CaO19.603|CaO19.8236	Predicted ORF in Assemblies 19, 20 and 21; decreased expression in response to prostaglandins
orf19.6918	1.76536	0.00545221		IPF2200.2|Contig4-2895_0007|orf6.7182|CA4599|CaJ7.0152|CaO19.6918|CaJ7_0152|CaO19_6918|IPF2200	Predicted ORF in Assemblies 19, 20 and 21
orf19.6710	1.75675	0.00129752	UTP9	orf19.14002|IPF20369.1|IPF3618.2|Contig4-1879_0002|orf6.6859|CA4339|CaO19.6710|CaO19.14002|IPF3618	Predicted ORF in Assemblies 19, 20 and 21; decreased expression observed in an ssr1 homozygous null mutant; decreased expression in response to prostaglandins; physically interacts with TAP-tagged Nop1p
orf19.6858	1.75619	2.75138e-05		orf19.14148|IPF8470|IPF20272.1|IPF8470.2|Contig4-2307_0005|orf6.7007|CA4461|CaO19.6858	Protein not essential for viability
orf19.6234	1.75279	0.0458936		orf19.13614|IPF12148.1|IPF12516.1|Contig4-2906_0007|orf6.1584|orf6.5122|CA3007|CaO19.6234|IPF12148	Predicted ORF in Assemblies 19, 20 and 21; mutation confers hypersensitivity to 5-fluorocytosine (5-FC), 5-fluorouracil (5-FU), and tubercidin (7-deazaadenosine)
orf19.4746	1.74995	0.00220081	JIP5	orf19.12208|IPF14019|IPF14019.1|IPF13928.2|orf6.3658|orf6.4016|CA1950|CaO19.4746	Protein not essential for viability; downregulated during core stress response
orf19.3327	1.74516	0.00241482	TRM2	orf19.10837|IPF23931.1|IPF8326.2|Contig4-2976_0009|orf6.5027|CA2936|CaO19.10837|TRM21|CaO19.3327|IPF8326	Predicted ORF in Assemblies 19, 20 and 21; decreased expression in response to prostaglandins
orf19.1308	1.74272	0.00068523		orf19.8888|IPF18658.2|IPF6676.2|Contig4-2324_0003|orf6.2772|orf6.3105|CA1324|FNX1|CaO19.1308|IPF6676	Predicted membrane transporter, member of the drug:proton antiporter (14 spanner) (DHA2) family, major facilitator superfamily (MFS)
orf19.5039	1.73823	0.0171017		orf19.12506|IPF22190.1|IPF12306.1|Contig4-2272_0001|Contig4-2272_0002|orf6.3316|CA1695|RRP42|CaO19.12506|CaO19.5039	Predicted ORF in Assemblies 19, 20 and 21
orf19.3126	1.73239	0.0010603	CCT6	orf19.10638|IPF24168.1|IPF14978.2|orf6.6919|CA4385|CaO19.10638|CaO19.3126	Predicted ORF in Assemblies 19, 20 and 21; mutation confers hypersensitivity to cytochalasin D
orf19.4670	1.72632	0.0196636	CAS5	orf19.12140|IPF22550.1|IPF7414.1|Contig4-2599_0003|orf6.4066|CA2243|CaO19.12140|CaO19.4670|IPF7414	Putative zinc finger transcription factor; cell wall damage response; required for wild-type transcriptional response to caspofungin; mutant caspofungin hypersensitive; downregulated in core stress response; avirulent, reduced CFU in mice
orf19.4499	1.72489	0.000925249	RIM2	orf19.11975|IPF22747.1|IPF4785.2|Contig4-2993_0015|orf6.4191|CA2330|CaO19.11975|CaO19.4499	Protein similar to S. cerevisiae Rim2p; induced in response to alpha pheromone in SpiderM medium
orf19.976	1.72313	0.00201635	BRE1	orf19.8591|IPF26322.1|IPF1598.2|Contig4-3103_0012|orf6.8225|CA5424|CaO19.976|CaO19.8591|IPF1598	Putative transcription factor with C3HC4 zinc finger DNA-binding motif; similar to S. cerevisiae Bre1p; transposon mutation affects filamentous growth
orf19.4563	1.70781	0.00645155		orf19.12032|IPF22609.1|IPF1047.1|Contig4-3104_0004|orf6.3095|CA1540|CaO19.12032|CaO19.4563|IPF1047	Predicted ORF in Assemblies 19, 20 and 21; decreased expression in response to prostaglandins
orf19.2185	1.69897	0.00352399	NSA1	orf19.9731|IPF25132.1|IPF12457.2|Contig4-2452_0006|orf6.3421|CA1770|CaO19.2185|CaO19.9731|IPF12457	Predicted ORF in Assemblies 19, 20 and 21; decreased expression in response to prostaglandins
orf19.5066	1.69738	0.00485821		orf19.12532|IPF22148.1|IPF15607.1|Contig4-2050_0001|orf6.1521|CA0534|CaO19.12532|CaO19.5066|IPF15607	Predicted ORF in Assemblies 19, 20 and 21; essential; S. cerevisiae ortholog is essential
orf19.7586	1.69683	5.82275e-06	CHT3	IPF696.1|Contig4-3108_0002|orf6.8934|CA5987|CaO19.7586	Chitinase, major; functional homolog of S. cerevisiae Cts1p; 4 N-glycosylation motifs; possible O-mannosylated region; putative signal peptide; hyphal-repressed; farnesol upregulated in biofilm; regulated by Efg1p, Cyr1p, Ras1p
orf19.2746	1.69673	0.0183267		orf19.10260|IPF14444.3|IPF28996.1|Contig4-3001_0019|orf6.4702|CA2702|EMP70|CaO19.2746|IPF14444.2	Predicted ORF in Assemblies 19, 20 and 21
orf19.6514	1.69612	2.92693e-05	CUP9	orf19.13867|IPF20614.1|IPF3912.1|Contig4-3089_0018|orf6.7646|CA4960|CaJ7.0235|CaO19.13867|CaO19_6514|CaJ7_0235|CaO19.6514|IPF3912	Protein of unknown function, upregulated in clinical isolates from HIV+ patients with oral candidiasis; transcription reduced upon yeast-hyphal switch; ketoconazole-induced; Plc1p-regulated; shows colony morphology-related Ssn6p regulation
orf19.2758	1.69245	0.0105085	PGA38	orf19.10273|orf19.10272|IPF11998.3|IPF17815.2|orf6.1331|orf6.3591|orf6.1332|orf6.3590|CA1898|orf19.2759|IPF11998|IPF11998.2	Putative GPI-anchored protein of unknown function; repressed during cell wall regeneration
orf19.2706	1.69059	0.00380417	CRH11	orf19.10221|orf6.1231|IPF24611.1|IPF14360.2|Contig4-1894_0003|CA0375|CRH1|CaO19.2706|CaO19.10221	Putative ortholog of S. cerevisiae Crh1p; predicted glycosyl hydrolase domain; similar to Csf4p, to antigenic Aspergillus fumigatus Aspf9; predicted Kex2p substrate; putative GPI-anchor; localizes to cell wall; caspofungin-induced
orf19.2687.1	1.69024	0.000400328		IPF24589.1|IPF7977.1|Contig4-2865_0002|CA2771|RPB10	ORF Predicted by Annotation Working Group
orf19.4739	1.69019	2.63345e-05	MSS116	orf19.12201|IPF22389.1|IPF10643.2|Contig4-2892_0003|orf6.3651|CA1945|CaO19.4739|CaO19.12201	Predicted ORF in Assemblies 19, 20 and 21; transcription is upregulated in both intermediate and mature biofilms
orf19.2708	1.68555	0.0314787		orf19.10223|IPF24626.1|IPF14356.2|Contig4-1779_0002|orf6.1233|CA0377|CaO19.2708|IPF14356	Predicted ORF in Assemblies 19, 20 and 21; nonessential
orf19.1791	1.6841	0.00123544		orf19.9357|IPF25533.1|IPF8738.2|Contig4-1853_0004|orf6.4370|CA2461|MAK11	Predicted ORF in Assemblies 19, 20 and 21
orf19.5106	1.68351	0.00254316	DIP2	orf19.12572|IPF22110.1|IPF14262.2|Contig4-2615_0005|Contig4-2615_0006|orf6.6344|CA3927|CaO19.12572|CaO19.5106	Protein similar to S. cerevisiae Dip2p, of small ribonucleoprotein complex; transposon mutation affects filamentous growth; physically interacts with TAP-tagged Nop1p; heterozygous null mutant exhibits resistance to parnafungin
orf19.3733	1.68223	0.00606165	IDP2	orf19.11218|IPF9177.2|Contig4-3070_0023|orf6.1691|orf6.5462|CA0643|CaO19.3733	Putative isocitrate dehydrogenase; expression is regulated upon white-opaque switching; shows colony morphology-related gene regulation by Ssn6p; protein detected by mass spec in exponential and stationary phase cultures
orf19.7637	1.68057	0.00106524	YHB4	orf6.8985|YHB1|IPF599.1|YHB3|Contig4-3108_0104|CA6030|CaO19.7637|YHB2	Protein related to flavohemoglobins; not required for wild-type nitric oxide resistance; has predicted globin, FAD-binding, and NAD(P)-binding domains but lacks some conserved residues of flavohemoglobins; no mRNA detected
orf19.4578	1.68013	0.0106762	CYT2	orf19.12047|orf6.7877|IPF22621.1|IPF1023.2|Contig4-3104_0025|CA5141|CaO19.12047|CaO19.4578	Protein described as cytochrome c1 heme lyase; transcription is regulated by Nrg1p; transcriptionally regulated by iron; expression greater in high iron
orf19.2003	1.67974	0.0229074	HNM1	orf19.9554|IPF4757.1|IPF19469.2|Contig4-2862_0011|orf6.42|orf6.6357|CA3939|HNM2|CaO19.2003	Predicted ORF in Assemblies 19, 20 and 21; mutation confers hypersensitivity to toxic ergosterol analog; shows colony morphology-related gene regulation by Ssn6p; clade-associated gene expression
orf19.3756	1.67842	0.000128857	CHR1	orf19.11240|IPF23503.1|IPF8903.2|Contig4-2804_0019|orf6.2262|CA1002|CaO19.3756|CaO19.11240|ROK1.3f|ROK1.3	Predicted DEAD-box ATP-dependent RNA helicase, functional homolog of S. cerevisiae Rok1p
orf19.1902	1.67647	0.0075677	NOC4	orf19.9458|IPF25429.1|IPF9717.2|Contig4-2752_0016|orf6.7018|CA4470|CaO19.1902|CaO19.9458|IPF9717	Predicted ORF in Assemblies 19, 20 and 21; mutation confers resistance to 5-fluorocytosine (5-FC), 5-fluorouracil (5-FU), and tubercidin (7-deazaadenosine)
orf19.2830	1.67552	0.0191398	RRP9	orf19.10348|IPF24486.1|IPF15036.2|Contig4-2090_0002|orf6.4491|CA2545|CaO19.10348|CaO19.2830	Predicted ORF in Assemblies 19, 20 and 21; mutation confers resistance to 5-fluorocytosine (5-FC), 5-fluorouracil (5-FU), and tubercidin (7-deazaadenosine); physically interacts with TAP-tagged Nop1p
orf19.5170	1.6711	0.0248156	ENA21	orf19.12637|IPF22107.1|IPF5411.2|ENA21.3|Contig4-3092_0037|orf6.6966|CA4425|CaJ7.0331|CaO19.5170|ENA2|CaO19.12637|CaJ7_0331|CaO19_5170|ENA21.3f	Predicted ORF similar to S. cerevisiae sodium transporters Ena1p and Ena5p; Gcn4p-regulated; flucytosine, amphotericin B, or ketoconazole-induced; osmotic stress-induced; overlaps orf19.5170.1, which is annotated as a blocked reading frame
orf19.3463	1.67027	0.000496464		orf19.10967|IPF23780.1|IPF13116.1|Contig4-2623_0007|orf6.3766|CA2030|LSG1|CaO19.10967|CaO19.3463|IPF13116	Predicted ORF in Assemblies 19, 20 and 21
orf19.6236	1.67016	0.0127747		orf19.13616|IPF12152.1|IPF12514.2|Contig4-2906_0005|orf6.5120|CA3006|CaO19.6236|IPF12152	Predicted ORF in Assemblies 19, 20 and 21
orf19.3481	1.66576	0.00558102		orf19.10985|IPF23785.1|IPF15646.2|Contig4-2024_0003|orf6.4978|CA2898|CaO19.10985|CaO19.3481|IPF15646	Putative protein of unknown function, transcription is activated in the presence of elevated CO2; predicted ORF in Assemblies 19, 20 and 21
orf19.6259	1.66506	9.08284e-05		orf19.13638|IPF12718.3|IPF12854.2|Contig4-2735_0003|orf6.2458|orf6.654|CA1125|CaO19.6259|RRP43	Predicted ORF in Assemblies 19, 20 and 21
orf19.3304	1.66179	0.0177231		orf19.10814|IPF23947.1|IPF7950.2|Contig4-2860_0018|orf6.7199|CA4613|CaO19.10814|RRP40|CaO19.3304|IPF7950	Predicted ORF in Assemblies 19, 20 and 21
orf19.5607	1.65965	0.00845187		orf19.13050|IPF16435.3|IPF16278.1|Contig4-1929_0002|orf6.5065|orf6.93|CA6225|CaO19.5607|IPF16278	Predicted ORF in Assemblies 19, 20 and 21
orf19.6175	1.65908	0.00300832		IPF3428.1|Contig4-3079_0006|orf6.5396|CA3196|CaO19.6175|IPF3428	Predicted ORF in Assemblies 19, 20 and 21; decreased expression in response to prostaglandins
orf19.7422	1.65841	0.00885893		IPF2440.1|Contig4-2982_0008|orf6.8582|CA5718|LCP5|CaO19.7422	Predicted ORF in Assemblies 19, 20 and 21
orf19.1253	1.65764	0.0061978		orf19.8838|IPF14649.2|IPF10541.2|Contig4-2799_0001|orf6.3005|orf6.5720|CA3452|CaO19.1253|IPF10541	Predicted ORF in Assemblies 19, 20 and 21; transcriptionally activated by Mnl1p under weak acid stress
orf19.4658	1.6557	0.00193983		orf19.12128|IPF11006|IPF22549.1|IPF11006.2|Contig4-2819_0003|orf6.4709|CA2706|CaO19.12128|HYZ99|CaO19.4658	Protein not essential for viability
orf19.6955	1.65172	9.93792e-05	HBR3	orf19.14217|IPF20192.1|IPF8661.1|Contig4-3085_0030|Contig4-3085_0031|orf6.7341|CA4718|CaO19.14217|NOB1|CaO19.6955|IPF8661	Essential, uncharacterized protein; regulated by hemoglobin; S. cerevisiae ortholog is essential
orf19.2397	1.65146	0.000505942		orf19.9933|IPF24912.1|IPF14040.2|orf6.3676|CA1963|CaO19.2397|VHT1|CaO19.9933|IPF14040	Predicted membrane transporter, member of the anion:cation symporter (ACS) family, major facilitator superfamily (MFS); amphotericin B, caspofungin repressed
orf19.2105	1.65116	0.0318637		orf19.9653|IPF25303.1|IPF10632.1|Contig4-2610_0004|orf6.4756|CA2741|CaO19.9653|CWC24|CaO19.2105|IPF10632	Predicted ORF in Assemblies 19, 20 and 21
orf19.5660.1	1.64916	0.0119136		IPF21567.1|IPF5277.1|Contig4-3054_0013|CA4369|TIM11	ORF Predicted by Annotation Working Group
orf19.4161	1.64899	0.0124828		orf19.11637|IPF18734.2|IPF16081.2|Contig4-2312_0002|orf6.2625|CA1228|CaO19.11637|QRI2|CaO19.4161|IPF16081	Predicted ORF in Assemblies 19, 20 and 21
orf19.1291	1.64532	0.000107814	ABZ1	orf19.9352|orf19.9353|IPF10474.2|Contig4-2660_0010|Contig4-2660_0012|orf6.1155|orf6.910|orf6.1154|CA0220|orf19.1786|orf19.1787|CaO19.1291	Protein not essential for viability; similar to S. cerevisiae Abz1p, which is para-aminobenzoate (PABA) synthase; reports differ on whether a murine homolog exists
orf19.7231	1.64264	0.0388039	FTR2	orf6.8131|IPF853.1|Contig4-3043_0021|CA5354|CaO19.7231	High-affinity iron permease; not required for mouse systemic virulence; regulated by iron level, ciclopirox olamine, amphotericin B, caspofungin; complements S. cerevisiae ftr1 iron transport defect; probably interacts with ferrous oxidase
orf19.3829	1.64097	0.0176768	PHR1	orf19.11310|orf6.7524|IPF23455.1|IPF15932.2|Contig4-2187_0001|Contig4-3060_0001|CA4857|CaO19.3829|CaO19.11310	Glycosidase of cell surface; may act on cell-wall beta-1,3-glucan prior to beta-1,6-glucan linkage; E169 and E270 at active site; role in systemic but not vaginal virulence (neutral, not low pH); high pH or filamentation induced
orf19.4701	1.6405	0.00430215		orf19.12171|IPF14514.1|IPF16375.2|orf6.1754|orf6.3520|CA0682|CaO19.4701|IPF14514	Predicted ORF in Assemblies 19, 20 and 21
orf19.4641	1.63275	0.00106923	NMT1	orf19.12111|NMT|IPF22592.1|IPF15592.2|Contig4-2596_0003|orf6.2367|CA1063|CaO19.4641|CaO19.12111	Myristoyl-CoA:protein N-myristoyltransferase; attaches the fatty acid myristate to a small number of proteins at an N-terminal Gly; essential; antifungal drug target; functional homolog of S. cerevisiae Nmt1p
orf19.558	1.63151	0.00143838	GUT1	orf19.8193|IPF26747.1|IPF3751.2|orf6.2137|CA0929|CaO19.8193|CaO19.558	Protein described as glycerol kinase; downregulated upon adherence to polystyrene; greater mRNA abundance observed in a cyr1 homozygous null mutant than in wild type
orf19.5198	1.62852	0.0078816	NOP4	orf19.12665|IPF22023.1|IPF7589.1|Contig4-2882_0011|orf6.3414|CA1766|CaO19.12665|CaO19.5198	Predicted ORF in Assemblies 19, 20 and 21; mutation confers hypersensitivity to 5-fluorocytosine (5-FC), 5-fluorouracil (5-FU), and tubercidin (7-deazaadenosine); downregulated in core stress response
orf19.172	1.62381	0.0353789	RPC19	orf19.7805|IPF27146.1|IPF16126.1|Contig4-2440_0002|orf6.2908|CA1417|CaO19.172|CaO19.7805|IPF16126	Predicted ORF in Assemblies 19, 20 and 21; transcription is upregulated in both intermediate and mature biofilms
orf19.1172	1.62321	0.0235837		orf19.8765|PHO84|IPF26171.1|IPF7638.2|orf6.3437|CA1782|CaO19.8765|CaO19.1172|PHO84.3eoc	Protein similar to phosphate transporters; regulated upon white-opaque switching or biofilm formation; Hog1p, ciclopirox olamine or alkaline induced; caspofungin or stress repressed; merged with orf19.655 in Assembly 20
orf19.1886	1.6229	0.00330681	RCL1	orf19.9442|IPF25440.1|IPF9148.2|Contig4-2743_0006|orf6.190|orf6.7034|CA0027|CaO19.1886	Predicted ORF in Assemblies 19, 20 and 21; essential; downregulated during core stress response; S. cerevisiae ortholog is essential
orf19.6297	1.61844	0.00142262		orf19.13676|IPF20852.1|IPF15695.1|Contig4-2128_0002|orf6.5447|CA3236|DEG1|CaO19.6297|CaO19.13676	Predicted ORF in Assemblies 19, 20 and 21
orf19.2167	1.61555	0.0241632		orf19.9713|IPF25129.1|IPF13717.1|Contig4-2572_0007|orf6.1804|CA0712|CaO19.9713|CaO19.2167|IPF13717	Predicted ORF in Assemblies 19, 20 and 21
orf19.4626	1.61539	0.00421276		orf19.12096|IPF22598.1|IPF10159.2|Contig4-2945_0024|orf6.7925|CA5188|TAP42|CaO19.12096|CaO19.4626	Predicted ORF in Assemblies 19, 20 and 21
orf19.7215	1.61499	0.0219242		IPF883.1|Contig4-3017_0022|orf6.8115|CA5340|CaO19.7215|IPF883	Predicted ORF in Assemblies 19, 20 and 21
orf19.2697	1.61425	0.01771		orf19.10212|IPF24635.1|IPF19781.1|Contig4-2782_0001|Contig4-2809_0001|orf6.5485|CA3263|UBR2|CaO19.10212|CaO19.2697|UBR12	Predicted ORF in Assemblies 19, 20 and 21
orf19.1272	1.60962	0.0108791		orf19.8858|IPF26080.1|IPF10270.2|Contig4-2192_0009|orf6.2164|CA0948|CaO19.8858|CaO19.1272|IPF10270	Predicted ORF in Assemblies 19, 20 and 21
orf19.6829	1.60673	0.0187498		orf19.14121|IPF20334.1|IPF12074.2|Contig4-2530_0011|orf6.8802|CA5880|AEP2|CaO19.14121|CaO19.6829|IPF12074	Predicted ORF in Assemblies 19, 20 and 21
orf19.1492	1.60606	0.0318726	PRP39	orf19.9069|IPF25748.1|IPF14401.2|Contig4-2358_0005|orf6.1461|CA0493|CA6189|PRP39.5f|CaO19.9069|CaO19.1492|PRP39.3f|PRP39.3	Putative component of the U1 snRNP, involved in splicing; ortholog of S. cerevisiae PRP39; predicted ORF in Assemblies 19, 20 and 21
orf19.4705	1.60359	0.013431		orf19.12176|IPF19340.2|IPF4444.2|Contig4-2960_0015|orf6.327|orf6.3516|CCA1|CaO19.4705|CA1841	Predicted ORF in Assemblies 19, 20 and 21
orf19.2360	1.60258	0.0120881	URA2	orf19.9896|IPF10801.3|IPF29131.1|Contig4-2886_0007|Contig4-2886_0008|orf6.2755|orf6.610|CA1315|CaO19.2360|URA2.5eoc|IPF10801.2	Predicted ORF in Assemblies 19, 20 and 21; flucytosine induced; macrophage/pseudohyphal-induced; intron in 5'-UTR
orf19.2619	1.5996	0.0100049	PHO113	orf19.11238|orf19.10150|orf6.4212|IPF24753.1|IPF7796.2|IPF23531.1|IPF28658.1|PHO11|Contig4-2761_0007|orf6.1652|CA0616|orf19.3754|PHO111|CaO19.2619|CaO19.10150	Protein described as a constitutive acid phosphatase; transcription is negatively regulated by Rim101p; DTT-extractable; N-glycosylated
orf19.4363	1.59263	0.0307702	SGD1	orf19.11841|YLR336C|Contig4-2883_0005|IPF7574.2|IPF28445.1|Contig4-2883_0008|Contig4-2883_0011|orf6.2425|orf6.3775|CA2035|CaO19.4363|CA2034|SGD1.3f|IPF18558.1|SGD1.5f	Predicted ORF in Assemblies 19, 20 and 21; downregulated during core stress response; transcription is increased in populations of cells exposed to fluconazole over multiple generations
orf19.4479	1.59168	0.00954101		orf19.11959|orf19.11960|IPF22770.1|IPF22776.1|IPF13757.2|IPF13756.2|Contig4-2664_0018|Contig4-2664_0021|orf6.4308|orf6.4307|CA2414|CA2413|orf19.4480|IPF13756.3f	Predicted ORF in Assemblies 19, 20 and 21; downregulated during core stress response
orf19.2760	1.58982	0.000111692		orf19.10276|IPF24586.1|IPF11996.2|Contig4-3083_0006|orf6.1333|orf6.6592|orf6.6593|CA0426|CFT1|CaO19.2760	Putative protein of unknown function; heterozygous null mutant exhibits hypersensitivity to parnafungin and cordycepin in the C. albicans fitness test; predicted ORF in Assemblies 19, 20 and 21
orf19.2667	1.58961	0.00244977	RPF1	orf19.10184|IPF12428.1|IPF12157.3|Contig4-3083_0028|orf6.1627|orf6.5567|CA0599|CaO19.2667|IPF12428	Predicted ORF in Assemblies 19, 20 and 21; essential for growth
orf19.3130	1.58852	0.00478408		orf19.10642|IPF24185.1|IPF7819.2|orf6.5867|CA3563|CaO19.3130|CaO19.10642|IPF7819	Predicted ORF in Assemblies 19, 20 and 21
orf19.4171	1.58849	3.30925e-05		orf19.11647|IPF6186.1|IPF17597.2|Contig4-2878_0005|orf6.101|orf6.6065|CA3721|CaO19.4171|IPF6186	Predicted ORF in Assemblies 19, 20 and 21
orf19.1826	1.58732	0.0131955	MDM34	orf19.9385|IPF25496.1|IPF14510.2|Contig4-2618_0001|Contig4-2753_0016|orf6.3433|CA1779|CaO19.1826|CaO19.9385|IPF14510	Putative transcription factor with zinc finger DNA-binding motif; macrophage-downregulated gene
orf19.2920	1.58563	0.0103927		orf19.10437|IPF17317.1|IPF11444.1|Contig4-2802_0005|orf6.167|orf6.3458|CA1801|CaO19.2920|IPF11444	Predicted ORF in Assemblies 19, 20 and 21
orf19.1416	1.58483	0.00492665	COX11	orf19.8992|IPF25913.1|IPF11240.1|Contig4-2563_0004|Contig4-2563_0005|orf6.6385|CA3958|CaO19.1416|CaO19.8992	Protein repressed during the mating process; transcription is regulated by Nrg1p; transcription is upregulated in both intermediate and mature biofilms
orf19.5010	1.58464	0.0142951	DIM1	orf19.12477|IPF22277.1|IPF1822.1|Contig4-3061_0009|orf6.7999|CA5252|CaO19.5010|CaO19.12477	Protein likely to be essential for growth, based on an insertional mutagenesis strategy; similar to S. cerevisiae Dim1p, which is an 18S rRNA dimethylase involved in rRNA modification and processing; induced upon biofilm formation
orf19.2362	1.58236	0.00350464		orf19.9898|IPF12844.2|IPF29130.1|Contig4-2886_0004|orf6.4078|CA2252|CaO19.9898|CaO19.2362|IPF12844	Predicted ORF in Assemblies 19, 20 and 21
orf19.4160	1.58216	0.048825		orf19.11636|IPF23091.1|IPF16082.2|Contig4-2312_0001|orf6.2624|CA1227|QRI7|CaO19.4160|CaO19.11636|IPF16082	Predicted ORF in Assemblies 19, 20 and 21
orf19.3124	1.58061	0.00356976		orf19.10636|IPF24183.1|IPF12414.2|Contig4-2435_0009|orf6.6921|CA4387|CaO19.10636|MAP1|CaO19.3124	Predicted ORF in Assemblies 19, 20 and 21
orf19.3754	1.57944	0.00234581	PHO111	orf19.11238|orf6.4212|IPF23531.1|IPF28658.1|PHO11|Contig4-2761_0007|CaO19.3754|CaO19.11238	Protein described as a constitutive acid phosphatase; transcription is negatively regulated by Rim101p; DTT-extractable; N-glycosylated; merged with orf19.2619 in Assembly 20
orf19.1426	1.57441	0.000357472		orf19.9002|IPF25901.1|IPF9375.2|orf6.6395|CA3965|CaO19.9002|CaO19.1426|IPF9375	Predicted ORF in Assemblies 19, 20 and 21
orf19.4076	1.57321	0.00407509	MET10	orf19.11557|IPF23180.1|IPF13194.2|Contig4-2114_0002|Contig4-2114_0003|Contig4-2114_0004|orf6.3204|CA1620|CaO19.4076|CaO19.11557	Predicted enzyme of sulfur amino acid metabolism; biofilm-induced expression; upregulated in the presence of human whole blood or polymorphonuclear (PMN) cells; Hog1p-induced; possibly adherence-induced
orf19.2330	1.57123	0.00172136		orf19.9866|IPF24986.1|IPF13361.2|orf6.5578|YOR205C|CA3342|CaO19.9866|UTP6|CaO19.2330|IPF13361	Predicted ORF in Assemblies 19, 20 and 21; transposon mutation affects filamentous growth; decreased expression in response to prostaglandins
orf19.2847	1.56801	0.00255		orf19.10366|IPF17922.3|IPF15457.2|Contig4-2393_0003|orf6.186|orf6.4941|CA2869|RPC82|CaO19.2847	Predicted ORF in Assemblies 19, 20 and 21
orf19.169	1.56703	0.00426361	CHO2	orf19.7802|IPF19595.2|IPF19594.1|Contig4-2571_0007|orf6.2905|orf6.628|CA1414|CaO19.169	Putative phosphatidyl-ethanolamine N-methyltransferase; fungal-specific (no human or murine homolog); amphotericin B repressed
orf19.7332	1.56581	0.00106982	ELF1	IPF1989.1|Contig4-3033_0019|orf6.8413|CA5568|CaO19.7332	Protein required for wild-type morphology, growth; Walker A and B (ATP/GTP binding) motifs, ABC transporter consensus; expressed in hyphal, pseudohyphal, and yeast form, upregulated in biofilm; S. pombe homolog is ABC ATPase of mRNA export
orf19.789	1.56549	0.00907199	PYC2	orf19.8408|orf6.2989|IPF26382.1|IPF26504.1|IPF15163.2|IPF15167.2|Contig4-3027_0007|CA1464|PYC2.3f|PYC2.exon2	Putative pyruvate carboxylase, binds to biotin cofactor; up-regulated in mutant lacking the Ssk1p response regulator protein, upon benomyl treatment, or in an azole-resistant strain overexpressing MDR1
orf19.3582	1.5654	0.000883295		orf19.11066|IPF23740.1|IPF3229.1|Contig4-2234_0003|orf6.5747|CA3477|CaO19.11066|CaO19.3582|IPF3229	Predicted ORF in Assemblies 19, 20 and 21
orf19.3129	1.56365	0.00476192		orf19.10641|IPF24175.1|IPF7823.2|Contig4-2672_0010|orf6.5866|CA3562|RVB1|CaO19.10641|CaO19.3129|IPF7823	Predicted ORF in Assemblies 19, 20 and 21; heterozygous null mutant displays sensitivity to virgineone
orf19.4634	1.56308	0.0176034		orf19.12104|IPF22600.1|IPF8996.2|Contig4-2825_0012|orf6.1840|CA0734|CaO19.4634|CaO19.12104|IPF8996	Predicted ORF in Assemblies 19, 20 and 21
orf19.3252	1.55975	0.0410688		orf19.10762|IPF23988.1|IPF236.2|Contig4-3062_0004|Contig4-3062_0007|orf6.8252|CA5449|CaO19.3252|CaO19.10762	Predicted zinc-finger protein of unknown function; has similarity to S. cerevisiae Dal81p, which is a transcription factor involved in the regulation of nitrogen-degradation genes
orf19.3303	1.55653	0.0435491		orf19.10813|IPF23921.1|IPF10724.2|Contig4-2491_0009|orf6.7198|CA4612|CaO19.10813|PPM2|CaO19.3303	Predicted ORF in Assemblies 19, 20 and 21
orf19.7634	1.55629	0.00208063	MCD1	IPF607.1|Contig4-3108_0100|Contig4-3108_0101|orf6.8982|CA6028|CaO19.7634|IPF607	Protein similar to S. cerevisiae Mcd1p; transcription is repressed in response to alpha pheromone in SpiderM medium; cell-cycle regulated periodic mRNA expression
orf19.6652	1.55618	0.0113151	DBP8	orf19.13973|IPF20514.1|IPF5004.1|Contig4-3035_0015|orf6.6549|CA4092|CaO19.6652|CaO19.13973	Protein likely to be essential for growth, based on insertional mutagenesis; similar to S. cerevisiae Dbp8p, which is an ATP-dependent helicase involved in rRNA processing; oxidative stress-repressed via Cap1p; flucytosine repressed
orf19.6903	1.55278	0.00375633		IPF2227.1|Contig4-3039_0012|orf6.7167|CA4585|CaJ7.0137|CaO19_6903|CaJ7_0137|CaO19.6903|RPC37|IPF2227	Predicted ORF in Assemblies 19, 20 and 21
orf19.5806	1.55058	0.0077913	ALD5	orf19.13228|YER73|IPF17030.2|IPF27910.1|Contig4-2921_0012|orf6.6640|CA4159|ALD99|CaO19.5806	Protein described as an aldehyde dehydrogenase; decreased expression in fluconazole-resistant isolate, or in hyphae; biofilm induced;fluconazole-downregulated; protein abundance is affected by URA3 expression in the CAI-4 strain background
orf19.748	1.54917	8.36102e-06		orf19.8368|orf19.14146|orf19.14147|IPF20259.1|IPF8467.2|IPF26549.1|IPF16922.2|Contig4-2307_0003|Contig4-2307_0004|orf6.4137|orf6.7005|orf6.7006|CA4459|CA4460|orf19.6856|orf19.6857|CaO19.748|NUP145	Predicted ORF in Assemblies 19, 20 and 21
orf19.4611	1.54841	0.000260598		orf19.12081|IPF22617.1|IPF6040.1|Contig4-2931_0004|orf6.7910|CA5174|CaO19.12081|PRS4|CaO19.4611	Predicted ORF in Assemblies 19, 20 and 21
orf19.3091	1.54835	0.0314316		orf19.10602|orf19.10603|IPF24217.1|IPF1742.3|Contig4-2877_0008|Contig4-2877_0009|Contig4-2877_0011|Contig4-2877_0013|orf6.3731|orf6.3730|orf6.6954|CA4414|orf19.3090|CaO19.3091|IPF1742|CA2008|IPF1742.3f.eoc|IPF1740.2	Predicted ORF in Assemblies 19, 20 and 21; downregulated during core stress response
orf19.6766	1.54536	0.00136804		orf19.14058|IPF20375.1|IPF2798.1|Contig4-3030_0014|orf6.8865|CA5935|NOP13|CaO19.6766|CaO19.14058|IPF2798	Predicted ORF in Assemblies 19, 20 and 21
orf19.946	1.54407	0.00133829	MET14	orf19.8561|IPF26346.1|IPF1543.1|Contig4-3103_0048|orf6.8195|CA5404|CaO19.946|CaO19.8561	Predicted ORF in Assemblies 19, 20 and 21; predicted role in sulfur metabolism; induced upon biofilm formation; possibly adherence-induced
orf19.379	1.5432	0.0349706		IPF19567.1|Contig4-2441_0002|orf6.329|CaO19.379	Predicted ORF from Assembly 19; removed from Assembly 20
orf19.2698	1.54215	0.00223072		orf19.10213|IPF24663.1|IPF5035.1|Contig4-2809_0003|orf6.5486|CA3264|CaO19.2698|CaO19.10213|IPF5035	Predicted ORF in Assemblies 19, 20 and 21
orf19.1708	1.54176	0.00101757		orf19.9275|IPF25649.1|IPF16533.2|Contig4-2424_0002|orf6.3119|CA1559|CaO19.9275|CaO19.1708|IPF16533	Predicted ORF in Assemblies 19, 20 and 21
orf19.5338	1.54117	0.0026097	GAL4	orf19.12798|IPF21869.1|IPF776.1|Contig4-3102_0054|orf6.8327|CA5497|CaO19.5338|CaO19.12798|IPF776	Putative transcription factor with zinc cluster DNA-binding motif; ortholog of S. cerevisiae Gal4p, but is not involved in the regulation of galactose utilization genes; caspofungin repressed
orf19.5654	1.54063	0.0146777		orf19.13099|IPF21528.1|IPF5265.1|Contig4-3054_0024|orf6.6894|CaO19.13099|STE24|CaO19.5654|CA4363	Predicted ORF in Assemblies 19, 20 and 21
orf19.4640	1.54061	0.00813554	PWP1	orf19.12110|IPF15595.2|IPF28303.1|Contig4-2596_0001|orf6.2368|CA1064	Predicted ORF in Assemblies 19, 20 and 21; downregulated in core stress response
orf19.7624	1.5402	0.0182531		IPF621.1|Contig4-3108_0091|orf6.8972|CA6021|CaO19.7624|BFR2	Predicted ORF in Assemblies 19, 20 and 21
orf19.6417	1.53668	0.0126092	TSR1	orf19.13775|IPF20707.1|IPF1334.1|Contig4-3073_0011|orf6.7837|CA5114|tsr1|CaO19.13775|CaO19.6417|IPF1334	Predicted ORF in Assemblies 19, 20 and 21; decreased expression in response to prostaglandins
orf19.1323	1.5361	0.0109849		orf19.8903|IPF26010.1|IPF12906.2|Contig4-2436_0008|orf6.4885|CA2826|APL6|CaO19.1323|CaO19.8903	Phosphorylated protein of unknown function; predicted ORF in Assemblies 19, 20 and 21
orf19.1313	1.53585	5.9118e-05	CDR3	orf19.8892|orf19.8893|IPF26026.1|IPF14709.3|YPL088-1|Contig4-1792_0002|orf6.3101|orf6.4875|CA1545|orf19.1312|CaO19.1312|CaO19.8892|CA2821|CDR3.3eoc|IPF17152.1|CDR3.5eoc|IPF14709.2	Transporter of the Pdrp/Cdrp family of the ATP-binding cassette (ABC) superfamily; transports phospholipids in an out-to-in direction; expressed in opaque-phase cells; induced by macrophage interaction; fluconazole-downregulated
orf19.6865	1.53581	0.0153707		orf19.14155|IPF20275.1|IPF9835.1|orf6.7014|CaO19.14155|CaO19.6865	Predicted ORF from Assembly 19; merged with orf19.2631 in Assembly 20
orf19.6355	1.53504	0.00338667		orf19.13712|IPF20800.1|IPF11376.2|Contig4-2117_0001|orf6.5784|CA3508|RRB1|CaO19.6355|CaO19.13712|RSA2	Predicted ORF in Assemblies 19, 20 and 21
orf19.1260	1.53412	0.00476826	LEA1	orf19.8845|IPF26087.1|IPF8521.1|Contig4-2968_0003|orf6.5727|CA3457|CaO19.8845|CaO19.1260|IPF8521	Protein similar to S. cerevisiae Lea1p; transcription is induced in response to alpha pheromone in SpiderM medium
orf19.655	1.53226	0.00171985	PHO84	orf19.8269|orf19.8765|IPF26171.1|IPF7638.2|IPF26640.1|IPF5438.2|orf6.447|orf6.3437|CA1782|CA0083|orf19.1172|PHO84.5eoc	Protein similar to high-affinity phosphate transporters; expression is regulated upon white-opaque switching or biofilm formation; Hog1p, ciclopirox olamine or alkaline induced; caspofungin or stress repressed; upregulated in RHE model
orf19.6477	1.53105	0.000105201		orf19.13831|IPF20597.1|IPF6605.2|Contig4-2536_0006|orf6.3717|CA1998|CaJ7.0274|CaO19.13831|CaO19.6477|CaO19_6477|CaJ7_0274|IPF6605	Predicted ORF in Assemblies 19, 20 and 21
orf19.4769	1.53037	0.0322699	IPT1	orf19.12233|IPF11674.2|IPF17541.2|IPF17540.2|Contig4-2253_0002|orf6.2538|orf6.2539|orf6.927|CA0228|CA6290|orf19.4770|IPT1.5f	Inositol phosphoryl transferase, involved in sphingolipid biosynthesis; catalyzes the synthesis of the most abundant sphingolipid, mannose-(inositol-P)2-ceramide, M(IP)2C, from MIPC; required for wild-type membrane localization of Cdr1p
orf19.7424	1.52989	0.00390804	NSA2	IPF2441.1|Contig4-2982_0009|Contig4-3080_0023|orf6.8584|CA5719|CaO19.7424|IPF2441	Predicted ORF in Assemblies 19, 20 and 21; decreased expression in response to prostaglandins
orf19.4635	1.52859	0.0384216	NIP1	orf19.12105|IPF22546.1|IPF8998.2|Contig4-2825_0008|orf6.1839|orf6.2373|CA0733|CaO19.4635	Putative translation initiation factor; mutation confers hypersensitivity to roridin A and verrucarin A; genes encoding ribosomal subunits, translation factors, and tRNA synthetases are downregulated upon phagocytosis by murine macrophage
orf19.679	1.52681	0.0127028	FGR39	orf19.8296|IPF26643.1|IPF7704.2|Contig4-2776_0010|orf6.6572|CA4114|CaO19.8296|CaO19.679|IPF7704	Protein lacking an ortholog in S. cerevisiae; transposon mutation affects filamentous growth; possibly spurious ORF (Annotation Working Group prediction)
orf19.3220	1.52527	0.000755041		orf19.10731|IPF24101.1|IPF14536.2|Contig4-2889_0006|orf6.3201|CA1617|CaO19.3220|CaO19.10731|IPF14536|IPF14536.1	Predicted ORF in Assemblies 19, 20 and 21
orf19.3823	1.52508	0.014074	ZDS1	orf19.11304|CES1|IPF23484.1|IPF5823.2|Contig4-2989_0013|orf6.7518|CA4853|IPF5823	Nonessential protein; similar to S. cerevisiae Zds1p
orf19.5356	1.5249	0.0105974		orf19.12816|IPF21819.1|IPF741.1|Contig4-3102_0027|orf6.8345|CA5510|CaO19.12816|CaO19.5356|IPF741	Predicted ORF in Assemblies 19, 20 and 21; downregulated during core stress response
orf19.4869	1.52338	0.00236619	SFU1	orf19.12333|orf6.2584|IPF22421.1|IPF19906.1|Contig4-2622_0003|Contig4-2622_0004|CA1201|CaO19.12333|CaO19.4869|IPF19906	Transcriptional regulator of iron-responsive genes; represses some iron utilization genes when iron is present; not required for wild-type hyphal growth; has two GATA1-like zinc fingers separated by Cys-rich iron-sensing region
orf19.3366.1	1.52322	0.00585981		IPF23888.1|IPF10397.2|CA0701|IPF10397	ORF Predicted by Annotation Working Group
orf19.1959	1.52148	0.00637646		orf19.9514|IPF25377.1|IPF15485.2|Contig4-2473_0003|orf6.4080|CA2253|CaO19.9514|CaO19.1959|IPF15485	Predicted ORF in Assemblies 19, 20 and 21
orf19.6818	1.52049	0.000885907		orf19.14110|IPF20440.1|IPF2409.2|Contig4-2745_0001|orf6.8813|CA5889|CaO19.14110|CaO19.6818|IPF2409	Predicted ORF in Assemblies 19, 20 and 21
orf19.6730	1.51798	0.0252074		orf19.14022|IPF20408.1|IPF3649.1|Contig4-1872_0004|orf6.6879|CA4355|CaO19.6730|CaO19.14022|IPF3649	Predicted ORF in Assemblies 19, 20 and 21
orf19.4413	1.51622	0.0206438	CMD1	orf19.11891|IPF16778.1|IPF6473.1|Contig4-2875_0013|orf6.2969|orf6.4226|CA1451|CaO19.4413|CMD1.3f	Calmodulin; calmodulin inhibitors cause a defect in hyphal growth; not transcriptionally regulated by yeast-hyphal transition; mutation confers hypersensitivity to cytochalasin D and high concentrations of tunicamycin; gene has intron
orf19.6578	1.51523	0.0145948		orf19.13931|IPF20585.1|IPF1634.1|Contig4-3066_0002|orf6.7566|CA4886|CaJ7.0166|CaO19.6578|CaO19.13931|CaO19_6578|CaJ7_0166|IPF1634	Predicted membrane transporter, member of the vesicular neurotransmitter (VNT) family, major facilitator superfamily (MFS); downregulated in core caspofungin response
orf19.255	1.51307	0.0374496		orf19.7887|IPF26971.1|IPF16368.2|Contig4-2723_0002|Contig4-2723_0003|Contig4-2723_0004|orf6.692|CA0153|IPF16368.5f	Predicted zinc-cluster protein of unknown function; possibly transcriptionally regulated upon hyphal formation; intron in 5'-UTR
orf19.7197	1.51255	0.0301851		IPF2142.1|Contig4-3097_0048|orf6.8097|CA5323|CaJ7.0440|CaO19_7197|CaJ7_0440|CaO19.7197|IPF2142	Putative protein of unknown function; heterozygous null mutant exhibits resistance to parnafungin in the C. albicans fitness test; predicted ORF in Assemblies 19, 20 and 21
orf19.5919	1.51227	0.00943493	MEA1	orf19.13340|IPF21186.1|IPF152.2|orf6.9118|CA6128|CaO19.5919|CaO19.13340|IPF152	Protein similar to A. nidulans MesA, which is involved in localization of actin cables
orf19.1569	1.51225	0.0148908	UTP22	orf19.9142|IPF8275.2|IPF29445.1|Contig4-2925_0002|Contig4-2925_0003|Contig4-2925_0005|orf6.6426|CA3993|CaO19.1569|IPF8275	Predicted ORF in Assemblies 19, 20 and 21; decreased expression observed in an ssr1 homozygous null mutant; decreased expression in response to prostaglandins; heterozygous null mutant exhibits resistance to parnafungin
orf19.551	1.51066	0.0479296		orf19.8186|IPF15641.2|IPF29791.1|Contig4-2649_0006|orf6.1932|CA0795|CaO19.551|IPF15641	Predicted ORF in Assemblies 19, 20 and 21
orf19.5597	1.50711	0.0268193	POL5	orf19.13042|IPF6793.3|Contig4-3004_0007|orf6.4439|orf6.5074|orf6.972|CA0245|CA6298|orf19.5598|POL5.5f|IPF17372.2	Predicted ORF in Assemblies 19, 20 and 21; induced upon biofilm formation
orf19.6916	1.50534	0.0176432		IPF2203.1|Contig4-2895_0003|orf6.7180|CA4597|CaJ7.0150|CaO19_6916|CaJ7_0150|ATP11|CaO19.6916	Predicted ORF in Assemblies 19, 20 and 21
orf19.5441	1.5053	0.0342591	ULP3	orf19.12896|IPF21693.1|IPF4195.1|orf6.8677|CA5792|CaO19.12896|ULP2|CaO19.5441|IPF4195	Putative SUMO deconjugation enzyme that removes the small ubiquitin-like modifier (SUMO) from proteins
orf19.1915	1.50498	0.0213281	MPP10	orf19.9471|IPF19846.2|IPF16234.2|orf6.1964|orf6.803|CA0813|CaO19.1915	Predicted ORF in Assemblies 19, 20 and 21; downregulated in core stress response; decreased expression in response to prostaglandins
orf19.943	0.664722	0.0274542	FET33	orf19.8558|IPF26325.1|IPF1540.2|Contig4-3103_0051|Contig4-3103_0052|orf6.8192|CA5401|FET397|CaO19.8558|CaO19.943|FET35.3	Putative multicopper ferro-O2-oxidoreductase; downregulated in core caspofungin response; fungal-specific (no human or murine homolog)
orf19.4824	0.664375	0.0319272		orf19.12287|IPF22463.1|IPF11480.2|Contig4-3078_0040|orf6.7387|CA4755|CaO19.12287|CaO19.4824|IPF11480	Predicted ORF in Assemblies 19, 20 and 21
orf19.5617	0.664095	0.045143		orf19.13062|IPF16806.1|IPF19169.2|Contig4-1981_0001|orf6.4776|orf6.723|CA2753|CaO19.5617|IPF16806	Predicted ORF in Assemblies 19, 20 and 21
orf19.6832	0.664026	0.00189641		orf19.14124|orf19.14125|IPF20332.1|IPF12080.1|IPF20329.1|IPF12082.2|Contig4-2530_0001|Contig4-2530_0005|Contig4-2530_0007|Contig4-2530_0013|orf6.8799|orf6.8798|CA5877|CA5876|orf19.6833|CaO19.6832|CaO19.14124|IPF12082.3f	Predicted ORF in Assemblies 19, 20 and 21
orf19.2480.1	0.663226	0.00741922	AUT7	IPF12408.2|IPF7188.3|Contig4-2966_0018|orf6.109|CA3802|AUT7.exon2	ORF Predicted by Annotation Working Group; macrophage/pseudohyphal-repressed; intron in 5'-UTR
orf19.5205	0.662881	0.0344251		orf19.12672|IPF22008.1|IPF13967.2|Contig4-2237_0004|orf6.3448|CA1791|CaO19.5205|CaO19.12672|IPF13967	Predicted ORF in Assemblies 19, 20 and 21
orf19.3443	0.662313	0.00181108	OYE2	orf19.10947|IPF23834.1|IPF5323.2|Contig4-2814_0011|orf6.6462|CaO19.10947|OYE22|CaO19.3443	Putative NAPDH dehydrogenase; fungal-specific (no human or murine homolog); induced by nitric oxide
orf19.3603	0.66216	0.00268337		orf19.11086|IPF23655.1|IPF16222.2|Contig4-1896_0001|Contig4-1896_0002|orf6.2224|CA0978|CaO19.11086|CaO19.3603|IPF16222	Predicted ORF in Assemblies 19, 20 and 21
orf19.4077	0.661572	0.00137643	MIT1	orf19.11558|SUR1|IPF2067.2|IPF28522.1|Contig4-2072_0001|Contig4-2072_0002|orf6.3203|CA1619|CaO19.11558|CaO19.4077|IPF2067	Protein involved in sphingolipid biosynthesis; required for mannosylation of inositol phosphoceramide (IPC) to form mannosylated sphingolipids MIPC and M(IP)2C; fluconazole, caspofungin induced; macrophage-downregulated gene
orf19.550	0.659657	0.0049806	PDX3	orf19.8185|IPF15643.2|IPF4274.2|Contig4-2070_0006|Contig4-2649_0004|orf6.6762|CA4261|CaO19.550	Transcription is regulated upon yeast-hyphal switch; regulated by Nrg1p, Mig1p, and Tup1p; caspofungin repressed; protein detected by mass spec in exponential and stationary phase cultures
orf19.3150	0.659466	8.41412e-05	GRE2	orf19.10660|orf6.1740|Contig4-2831_0003|GRP4|IPF15555.2|IPF28876.1|CA0671|CaO19.3150|GRE23|CaO19.10660	Protein described as a reductase; transcription is regulated by Nrg1p and Tup1p; benomyl-induced; hyphal-induced; macrophage/pseudohyphal-repressed; expression greater in low iron; reported to be involved in osmotic stress response
orf19.719	0.658943	0.00181222		orf19.8338|IPF14027.3|IPF17505.2|Contig4-2196_0004|orf6.2640|orf6.272|CA0043|CaO19.719|HRD1	Predicted ORF in Assemblies 19, 20 and 21
orf19.2107	0.65843	0.0117172	MUQ1	orf19.9655|IPF25279.1|IPF10634.2|Contig4-1856_0005|orf6.4754|CA2739|CaO19.2107|CaO19.9655	Protein described as choline phosphate cytidylyltransferase/phosphoethanolamine cytidylyltransferase; decreased expression in hyphae compared to yeast-form cells
orf19.2334	0.658049	0.00201374	BIG1	orf19.9870|IPF24995.1|IPF13583.2|Contig4-3011_0019|orf6.5574|CA3337|CaO19.2334|CaO19.9870|IPF13583	Protein of the endoplasmic reticulum required for beta-1,6-glucan synthesis, filamentation, adhesion, and virulence; ortholog of S. cerevisiae Big1p
orf19.6739	0.656707	0.0172998		orf19.14031|IPF20339.1|IPF3510.1|Contig4-3034_0023|orf6.8892|CA5955|CaO19.6739|CaO19.14031|IPF3510	Predicted ORF in Assemblies 19, 20 and 21
orf19.2277	0.656559	0.00147782	TPK2	orf19.9817|IPF25055.1|IPF10304.1|Contig4-3049_0025|Contig4-3049_0027|orf6.3564|CA1874|CaO19.2277|CaO19.9817	Catalytic subunit of cAMP-dependent protein kinase (PKA), isoform of Tpk1p; required for wild-type epithelial cell damage and engulfment and oral (not systemic) virulence in mouse; involved in control of morphogenesis and stress response
orf19.4358	0.654801	0.00908759		orf19.11836|IPF17510.1|IPF12948.1|Contig4-2535_0001|orf6.253|orf6.3780|CA2038|CaO19.4358|IPF17510	Predicted ORF in Assemblies 19, 20 and 21
orf19.6194	0.652762	0.00454941		orf19.13574|IPF10001|IPF20922.1|IPF10001.2|Contig4-1805_0002|orf6.5430|CA3220|CaO19.13574|CaO19.6194	Protein not essential for viability; possibly spurious ORF (Annotation Working Group prediction)
orf19.6816	0.651613	0.00375625		orf19.14108|IPF20400.1|IPF2400.1|Contig4-3076_0009|orf6.8815|CA5891|CaO19.6816|CaO19.14108|IPF2400	Predicted ORF in Assemblies 19, 20 and 21
orf19.3302	0.650395	0.0206301		orf19.10812|IPF23920.1|IPF10727.1|Contig4-2491_0004|orf6.7197|CA4611|CaO19.3302|CaO19.10812|IPF10727	Predicted ORF in Assemblies 19, 20 and 21; transcription downregulated upon yeast-hyphal switch; transcriptionally activated by Mnl1p under weak acid stress
orf19.434	0.648795	0.00337844	PRD1	orf19.8064|IPF5940.2|IPF29825.1|Contig4-2492_0001|Contig4-2492_0002|orf6.6503|CA4059|CaO19.8064|CaO19.434	Transcription is regulated by Nrg1p, Mig1p, and Tup1p; Hog1p-induced
orf19.767	0.646699	0.00101944	ERG3	orf19.8387|IPF16592.2|IPF3890.1|Contig4-1987_0003|orf6.3667|orf6.696|CA1956|CaO19.8387|CaO19.767	C-5 sterol desaturase; introduces C-5(6) double bond into episterol in ergosterol biosynthesis; clinically-isolated homozygous null mutants show azole resistance, defects in hyphal growth and virulence; Efg1p-repressed; fluconazole-induced
orf19.4747	0.646494	0.0368256	HEM14	orf19.12209|orf6.4017|orf6.3659|IPF19663.1|IPF19662.1|CA1951|CaO19.4747	Putative protoporphyrinogen oxidase involved in heme biosynthesis; predicted Kex2p substrate; transcription is regulated by iron; mRNA levels are decreased in a yfh1 null mutant
orf19.2426	0.643795	0.0022728		orf19.9964|orf19.10382|IPF24925.1|IPF17722.2|IPF24494.1|IPF7309.1|Contig4-2091_0001|orf6.5167|orf6.3266|CA1663|orf19.2864|CaO19.9964|CaO19.2426	Predicted ORF in Assemblies 19, 20 and 21
orf19.1911	0.641827	0.043422	PGA52	orf19.9467|IPF15442.1|IPF14463.2|Contig4-2107_0004|Contig4-2832_0018|orf6.1967|orf6.799|CA0188|CaO19.1911|IPF15442	Putative GPI-anchored protein of unknown function; fluconazole-induced
orf19.1653	0.641279	0.00935557		orf19.9222|IPF25655.1|IPF15087.2|Contig4-2710_0009|orf6.3138|CA1573|CaO19.1653|CaO19.9222|IPF15087	Predicted ORF in Assemblies 19, 20 and 21; possibly spurious ORF (Annotation Working Group prediction)
orf19.4304	0.641012	0.0452318	GAP1	orf19.11780|orf6.4609|IPF22960.1|IPF2936.1|GAP3|Contig4-3019_0033|CA2638|CaO19.4304|CaO19.11780	General amino acid permease; antigenic in human, mouse; 10-12 transmembrane regions; regulated by nitrogen source; alkaline, GlcNAc, phagocytosis upregulated; not required for virulence in mouse systemic infection; fungal-specific
orf19.5961	0.640753	0.000584619		orf19.13382|IPF21255.1|IPF56.1|Contig4-3087_0009|orf6.9076|CA6096|CaO19.5961|NAS6|CaO19.13382|IPF56	Predicted ORF in Assemblies 19, 20 and 21; described as similar to S. cerevisiae Nas6p proteasome component; induced upon adherence to polystyrene; regulated by Gcn2p and Gcn4p
orf19.5971	0.640424	0.00171006		orf19.13392|IPF21189.1|IPF36.1|Contig4-3042_0016|orf6.9066|CA6087|CaO19.5971|CaO19.13392|YHV1	Predicted ORF in Assemblies 19, 20 and 21
orf19.941	0.640184	0.0148322	SEC14	orf19.8556|IPF26340.1|IPF9666.1|orf6.8190|CA5398|CaO19.941|CaO19.8556	Essential protein; functional homolog of S. cerevisiae Sec14p, which is a Golgi phosphatidylinositol/phosphatidylcholine transfer protein that regulates choline-phosphate cytidyltransferase and thereby affects secretion; biofilm-regulated
orf19.3656	0.63798	0.000492495	COX15	orf19.11140|IPF23635.1|IPF13028.2|Contig4-2704_0006|orf6.3305|CA1688|CaO19.3656|CaO19.11140	Transcription is regulated by Nrg1p and Tup1p; alkaline downregulated
orf19.5527	0.637919	0.00875392		orf19.12973|IPF21588.1|IPF4331.1|Contig4-2690_0004|orf6.4469|CA2527|YMR285|NGL2|CaO19.5527|IPF4331	Predicted ORF in Assemblies 19, 20 and 21; similar to S. cerevisiae Ymr285p and Yml118p; gene transcribed divergently from SEC20
orf19.5030	0.637513	0.0145414		orf19.12497|IPF18123.2|IPF3014.1|Contig4-3075_0032|orf6.7979|CA5234|CaO19.5030|CaO19.12497|IPF3014	Predicted ORF in Assemblies 19, 20 and 21; induced during planktonic growth
orf19.778	0.63664	0.0116649	PIL1	orf19.8400|orf6.893|EBP1|IPF26526.1|IPF9770.2|Contig4-2697_0002|CA6179|CaO19.778|SLB1|CaO19.8400|IPF9770	Echinocandin-binding protein; localizes to cell surface of hyphae, but not yeast-form cells; biofilm induced; fungal-specific (no human or murine homolog)
orf19.4738	0.634991	0.000843002		orf19.12200|IPF22411.1|IPF10645.2|Contig4-2892_0001|orf6.3650|CA1944|CaO19.4738|CaO19.12200|IPF10645	Predicted ORF in Assemblies 19, 20 and 21
orf19.149	0.633964	0.000801338		IPF27154.1|IPF29941.1|orf6.62	Predicted ORF in Assemblies 19, 20 and 21
orf19.4836	0.630186	5.8919e-06	URA1	orf19.12299|IPF22436.1|IPF4487.2|Contig4-3078_0020|orf6.7375|CA4745|CaO19.12299|CaO19.4836	Dihydroorotate dehydrogenase (DHODH); enzyme of de novo pyrimidine biosynthesis; putative bipartite mitochondrial targeting motif, membrane spanning region; transcription is regulated upon yeast-hyphal switch, or by Nrg1p, Mig1p, Tup1p
orf19.2092	0.629305	0.0194388		orf19.9639|IPF25274.1|IPF1162.1|Contig4-2971_0019|orf6.7463|CA4809|STR3|CaO19.2092|CaO19.9639|IPF1162	Predicted ORF in Assemblies 19, 20 and 21; Gcn4p-regulated
orf19.20	0.629268	0.0241272	RTS1	orf19.7691|IPF27207.1|IPF3870.2|Contig4-3047_0003|orf6.2653|CA1247|CaO19.7691|CaO19.20|IPF3870	Transcription is regulated upon yeast-hyphal switch
orf19.6077	0.628023	0.00544657		orf19.13498|IPF8369.2|IPF27822.1|Contig4-2396_0004|orf6.7621|CA4936|CaO19.13498|CaO19.6077|IPF8369	Predicted ORF in Assemblies 19, 20 and 21; shows colony morphology-related gene regulation by Ssn6p
orf19.4887	0.627403	0.0157309	ECM21	orf19.12352|IPF18663.2|IPF7541.3|Contig4-2934_0009|orf6.3053|orf6.3331|ECM21.3|CA1707|CaO19.4887|CA1515|IPF18663.1	Protein not essential for viability; similar to S. cerevisiae Ecm21p (may have cell wall role); alkaline upregulated by Rim101p; fluconazole induced; caspofungin repressed; downregulated in azole-resistant strain overexpressing MDR1
orf19.1011	0.626756	0.038304		orf19.8625|IPF26282.1|IPF3740.1|Contig4-3028_0018|orf6.2169|CA0951|MNN21|CaO19.8625|CaO19.1011|MNN6	Predicted ORF in Assemblies 19, 20 and 21
orf19.5602	0.625976	0.00102092	BMT6	orf19.13045|IPF21591.1|IPF19772.1|Contig4-2108_0003|orf6.5070|CA2969|WRY2|CaO19.5602|IPF19772	Putative beta-mannosyltransferase, member of a 9-gene family that includes characterized genes BMT1, BMT2, BMT3, and BMT4 with roles in beta-1,2-mannosylation of cell wall phosphopeptidomannan; predicted ORF in Assemblies 19, 20 and 21
orf19.5911	0.625403	0.0169255	CMK1	orf19.13332|IPF21212.1|IPF4358.1|Contig4-3037_0009|orf6.9126|CA6135|CaO19.13332|CaO19.5911	Expression is regulated upon white-opaque switching; biochemically purified Ca2+/CaM-dependent kinase is soluble, cytosolic, monomeric, and serine-autophosphorylated
orf19.6833	0.624926	0.0190177		orf19.14125|IPF20329.1|IPF12082.2|Contig4-2530_0001|Contig4-2530_0005|Contig4-2530_0013|orf6.8798|CA5876|CaO19.14125|CaO19.6833|IPF12082.5f	Predicted ORF from Assembly 19; merged with orf19.6832 in Assembly 20
orf19.1861	0.623642	0.000889952		orf19.9417|orf19.9763|IPF25427.1|IPF4071.2|IPF25109.1|IPF29169.1|orf6.1261|orf6.4263|CA0385|orf19.2218|CaO19.1861|CaO19.9417|IPF4071	Predicted ORF in Assemblies 19, 20 and 21
orf19.4351	0.623638	0.0366598	PRP12	orf19.11829|IPF15868.3|IPF12922.2|Contig4-2720_0005|Contig4-2720_0006|orf6.2807|orf6.4544|orf6.6327|CA1349|CaO19.4351|PRP121	Predicted ORF from Assembly 19; fungal-specific (no human or murine homolog); merged with orf19.4379 in Assembly 20
orf19.3442	0.622711	0.00204009		orf19.10946|IPF23833.1|IPF5322.2|Contig4-2814_0014|orf6.6463|CA4021|OYE23|CaO19.10946|CaO19.3442|EBP2	Predicted ORF in Assemblies 19, 20 and 21
orf19.3051	0.622453	0.0198954		orf19.10569|IPF24324.1|IPF15301.2|Contig4-3098_0020|orf6.7788|CA5076|CaO19.3051|CaO19.10569|IPF15301	Predicted ORF in Assemblies 19, 20 and 21; shows colony morphology-related gene regulation by Ssn6p
orf19.6706	0.619389	0.024077	GYP7	orf19.13998|IPF20471.1|IPF6656.2|Contig4-2413_0003|orf6.6815|CA4306|CaJ7.0400|CaO19.6706|CaO19_6706|CaJ7_0400|CaO19.13998	Predicted ORF in Assemblies 19, 20 and 21; similar to S. cerevisiae Gyp7p (GTPase-activating protein for Ypt1p); caspofungin-induced
orf19.1183	0.619041	0.0277856		orf19.8774|IPF13094.1|IPF13902.1|Contig4-2980_0013|orf6.1749|orf6.4620|CA0678|CaO19.1183|IPF13094	Predicted ORF in Assemblies 19, 20 and 21
orf19.4109	0.615748	0.0372334	PMT4	orf19.11590|IPF23133.1|IPF2115.1|Contig4-2950_0002|orf6.6827|CA4314|CaO19.4109|CaO19.11590	Protein mannosyltransferase required for normal cell wall composition and full virulence in mouse systemic infection; has roles in hyphal growth and drug sensitivity; one of 5 PMT family members; Axl2p is a substrate
orf19.3278	0.614877	0.0478424	GSY1	orf19.10788|IPF24014.1|IPF294.1|Contig4-2791_0013|orf6.8278|CA5467|CaO19.3278|CaO19.10788	Protein described as glycogen synthase; enzyme of glycogen metabolism; transcription downregulated upon yeast-hyphal switch and regulated by Efg1p; strong oxidative stress induced; shows colony morphology-related gene regulation by Ssn6p
orf19.6559	0.614216	0.00266358		orf19.13912|IPF20619.1|IPF1674.1|Contig4-2941_0005|orf6.7547|CaJ7.0186|orf19.6558.1|CA4874|IPF1674|CA4873|IPF1674.3|IPF1675.1	Predicted ORF in Assemblies 19, 20 and 21; protein level decreased in stationary phase cultures
orf19.2525	0.612728	0.0408274	LYS12	orf19.10060|IPF24758.1|IPF4979.2|Contig4-2933_0019|Contig4-2933_0021|orf6.3372|CA1737|CaO19.2525|CaO19.10060	Protein described as mitochondrial homoisocitrate dehydrogenase; clade-associated gene expression; protein level decreased in stationary phase cultures
orf19.333	0.608758	0.0195545	FCY2	orf19.7965|FCY22|IPF8342.3|IPF12764.2|Contig4-2216_0002|Contig4-2705_0018|orf6.1188|orf6.1275|orf6.5625|CA0357|FCY21|CaO19.333	Putative purine-cytosine permease of pyrimidine salvage; similar to S. cerevisiae Fcy2p; mutation associated with resistance to flucytosine in clinical isolates; transposon mutation affects filamentation; farnesol-upregulated in biofilm
orf19.4900	0.608534	0.011525		orf19.12366|IPF17635.3|IPF8854.2|Contig4-2409_0001|orf6.2025|orf6.4237|CA0854|CaO19.4900|IPF8854	Predicted ORF in Assemblies 19, 20 and 21
orf19.4736	0.603513	0.0102936		orf19.12198|IPF22412.1|IPF19888.1|Contig4-2643_0008|Contig4-2643_0009|orf6.2087|CA0892|CaO19.4736|CaO19.12198|PHO8.5	Predicted ORF in Assemblies 19, 20 and 21
orf19.4523	0.603105	0.00105882		orf19.11998|IPF22723.1|IPF9973.2|Contig4-2702_0013|orf6.3048|CA1510|CaO19.11998|CaO19.4523|IPF9973	Predicted ORF in Assemblies 19, 20 and 21
orf19.7404	0.602917	0.0055184		IPF2644.2|Contig4-3029_0004|orf6.8564|CA5704|CaO19.7404|CHA1|CHA11	Predicted ORF in Assemblies 19, 20 and 21
orf19.1632	0.602521	0.0212561		orf19.9200|IPF25634.1|IPF4256.2|Contig4-2997_0018|orf6.6440|CA4004|CaO19.1632|CaO19.9200|IPF4256	Predicted ORF in Assemblies 19, 20 and 21
orf19.4246	0.602101	0.00210653		orf19.11721|IPF22957.1|IPF6881.2|Contig4-2928_0003|orf6.3978|orf6.6599|YKR070W|CA2186|CaO19.4246|IPF6881	Predicted ORF in Assemblies 19, 20 and 21; similar to S. cerevisiae Ykr070wp; transposon mutation affects filamentous growth; Hog1p-downregulated; shows colony morphology-related gene regulation by Ssn6p; induced during cell wall regeneration
orf19.7445	0.601477	8.09585e-06		IPF2878.1|Contig4-2403_0005|orf6.8605|CA5735|VID24|CaO19.7445|IPF2878	Predicted ORF in Assemblies 19, 20 and 21
orf19.2251	0.598912	0.0289512	AAH1	orf19.9791|IPF25061.1|IPF10117.2|Contig4-2104_0002|orf6.5895|orf6.307|CA3587|CaO19.2251	Protein not essential for viability; similar to S. cerevisiae Aah1p, which is an adenine deaminase involved in purine salvage and nitrogen catabolism; shows colony morphology-related gene regulation by Ssn6p; Hog1p-, biofilm-, CO2-induced
orf19.223	0.597577	0.000595786		orf19.7854|IPF19261.2|IPF13825.2|Contig4-2835_0022|orf6.276|orf6.278|orf6.476|orf6.5150|CA3029|CaO19.223|IPF13825	Predicted ORF in Assemblies 19, 20 and 21; increased expression in response to prostaglandins
orf19.7323	0.597548	0.00102007	CBP1	CBP|IPF1971.2|orf6.8404|CA5559|CaO19.7323	Corticosteroid binding protein; transcription induced at late log-phase or upon adherence to polystyrene; not induced by corticosterone; contains a possible NAD/FAD binding region; regulated by Nrg1p, Tup1p
orf19.5045	0.59717	0.0238033		orf19.12512|IPF22192.1|IPF19279.2|IPF18627.1|IPF15681.2|Contig4-2568_0005|orf6.3322|orf6.427|CA1698|IPF15681	Predicted ORF in Assemblies 19, 20 and 21; transcriptionally activated by Mnl1p under weak acid stress
orf19.4082	0.596413	0.006456	DDR48	orf19.11563|orf6.6854|DDR99|IPF23163.1|IPF2075.1|Contig4-3095_0012|CA4336|CaO19.11563|CaO19.4082	Immunogenic stress-associated protein; regulated by filamentous growth pathways; induced by benomyl, caspofungin, or in azole-resistant strain; Hog1p, farnesol, alkaline downregulated; similar to S. cerevisiae Ddr48p
orf19.4031	0.595753	0.000263331		orf19.11514|IPF23202.1|IPF3380.2|Contig4-3094_0016|orf6.7444|CA4796|CaO19.4031|CaO19.11514|IPF3380	Predicted ORF in Assemblies 19, 20 and 21
orf19.2484	0.59438	0.00235965		orf19.10020|IPF24843.1|IPF12403.2|Contig4-2966_0014|orf6.6165|CA3805|CaO19.2484|CaO19.10020|IPF12403	Predicted ORF in Assemblies 19, 20 and 21
orf19.868	0.590613	0.00132871	ADAEC	orf19.8487|IPF3937.2|IPF3935.3|Contig4-2634_0003|orf6.2588|orf6.72|CA1203|CaO19.868|IPF3937	Transcription is specific to white cell type
orf19.3053	0.586513	0.00131319		orf19.10571|IPF24357.1|IPF15297.1|Contig4-3098_0017|orf6.7790|CA5078|CaO19.10571|CaO19.3053|IPF15297	Predicted ORF in Assemblies 19, 20 and 21; identified in extracts from biofilm and planktonic cells; protein detected by mass spec in exponential and stationary phase cultures
orf19.4041	0.58138	0.0220284	PEX4	orf19.11524|IPF8784.1|IPF7214.1|Contig4-3094_0004|orf6.4408|orf6.7454|CA4803|CaO19.4041	Predicted ORF in Assemblies 19, 20 and 21; transcription is upregulated in both intermediate and mature biofilms
orf19.4287	0.580618	0.0280048		orf19.11763|IPF2965.2|IPF17863.2|Contig4-3019_0006|Contig4-3019_0008|orf6.172|orf6.5199|CA3061|BZD99|CaO19.4287|IPF2965	Predicted ORF in Assemblies 19, 20 and 21; clade-associated gene expression
orf19.1149	0.579103	0.0151892	MRF1	orf19.8742|IPF11717.2|IPF14722.3|Contig4-2773_0007|orf6.100|orf6.2782|CA1333|ETR2|CaO19.1149	Protein similar to mitochondrial respiratory proteins; increased transcription observed upon benomyl treatment; induced by farnesol, nitric oxide, core stress response; oxidative stress-induced via Cap1p
orf19.3007.2	0.578527	0.00329551		IPF24352.1|IPF5360.1|Contig4-3096_0015|CA3119|IPF5360|IPF5360.3	ORF Predicted by Annotation Working Group
orf19.1788	0.578181	0.0467688		orf19.9354|IPF25535.1|IPF25530.1|IPF10471.2|IPF10472.2|Contig4-2660_0006|orf6.1156|CA0341|XKS1	Predicted ORF from Assembly 19; merged with orf19.1290 in Assembly 20
orf19.2613	0.577521	0.0349575	ECM4	orf19.10144|IPF24763.1|IPF8505.2|Contig4-2859_0005|orf6.4272|ECM41|CA2386|ECM41.3f|ECM41.3	Protein similar to S. cerevisiae Ecm4p; transcription is regulated by Nrg1p and Tup1p; induced in core stress response or in cyr1 or ras1 homozygous null mutant (yeast-form or hyphal cells); transposon mutation affects filamentous growth
orf19.388	0.576276	0.0430316	CAF16	orf19.8018|IPF26920.1|IPF7283.2|Contig4-3031_0023|orf6.6276|CaO19.8018|CaO19.388|CA3880	ABC family protein, predicted not to be a transporter; caspofungin repressed
orf19.7242	0.576179	0.00117605	NCR1	IPF829.1|Contig4-3014_0027|orf6.8142|CA5363|CaO19.7242	Transcription is regulated by Nrg1p and Mig1p; increased expression in response to prostaglandins
orf19.5622	0.572902	0.0425145	GLC3	orf19.13067|IPF16449.2|IPF13786.3|Contig4-2165_0001|orf6.204|orf6.4781|CA2758|GLC3.3f	Protein described as similar to 1,4-glucan branching enzyme; fluconazole-induced; shows colony morphology-related gene regulation by Ssn6p; protein detected by mass spec in stationary phase cultures
orf19.6596	0.570596	0.00138662		IPF8179.2|Contig4-2811_0030|orf6.6208|CA3836|CaO19.6596|IPF8179	Protein of unknown function; possibly transcriptionally regulated by Tac1p; transcriptionally activated by Mnl1p under weak acid stress; protein detected by mass spec in exponential and stationary phase cultures
orf19.1067	0.564803	0.000112137	GPM2	orf19.8669|IPF26265.1|IPF7065.1|GPM1-2|Contig4-2688_0002|orf6.4922|CA2855|CaO19.1067|CaO19.8669	Protein described as phosphoglycerate mutase; decreased expression in hyphae compared to yeast-form cells; macrophage/pseudohyphal-repressed; induced by high levels of peroxide stress, farnesol-induced
orf19.2261	0.564282	0.000960843		orf19.9801|IPF25070.1|IPF11104.2|Contig4-2843_0018|orf6.5885|CA3579|CaO19.9801|SAP49|CaO19.2261|HSH49	Predicted ORF in Assemblies 19, 20 and 21
orf19.6214	0.564233	0.00058995	ATC1	orf19.13595|IPF19760|ATH1|IPF20966.1|IPF19760.1|Contig4-1596_0001|Contig4-2632_0007|orf6.4526|CA2574|CaO19.6214|CaO19.13595	Cell wall acid trehalase; catalyzes hydrolysis of the disaccharide trehalose; similar to S. cerevisiae vacuolar acid trehalase (Ath1p)
orf19.4898	0.562933	0.0208551		orf19.12363|IPF8950.1|IPF28258.1|Contig4-2955_0025|orf6.4234|CA2361|CaO19.12363|CaO19.4898|IPF8950	Predicted ORF in Assemblies 19, 20 and 21; increased expression in response to prostaglandins
orf19.7567	0.562628	0.0217472		IPF931.1|Contig4-3105_0044|orf6.8915|CA5973|CaO19.7567|IPF931	Predicted ORF in Assemblies 19, 20 and 21; transcription is induced in response to alpha pheromone in SpiderM medium
orf19.1743	0.562072	0.0276268	ACS1	orf19.9310|IPF25554.1|IPF15005.2|Contig4-2199_0001|orf6.2015|CA0848|CaO19.9310|CaO19.1743	Putative acetyl-CoA synthetase, similar to S. cerevisiae Acs1p; upregulated in the presence of human neutrophils; fluconazole-downregulated; regulated by Nrg1p and Mig1p; shows colony morphology-related gene regulation by Ssn6p
orf19.1564	0.561805	0.00979065		orf19.9137|IPF25819.1|IPF7145.2|Contig4-2824_0002|orf6.6421|CA3988|CaO19.9137|CaO19.1564|IPF7145	Predicted ORF in Assemblies 19, 20 and 21
orf19.347	0.561706	0.00449465	RSN1	orf19.7980|IPF27030.1|IPF1506.1|Contig4-3090_0035|orf6.7231|CA4640|CaO19.7980|CaO19.347|IPF1506	Protein induced during the mating process
orf19.768	0.559346	0.000680505	SYG1	orf19.8389|IPF16589.3|IPF3887.2|Contig4-2869_0003|orf6.3668|orf6.698|CA1957|CaO19.768|IPF3887	Protein not essential for viability; similar to S. cerevisiae Syg1p, which is a plasma membrane protein that may be involved in signal transduction
orf19.7229	0.555502	0.0434095		IPF855.1|Contig4-3043_0019|orf6.8129|CA5353|CaO19.7229|IML2	Predicted ORF in Assemblies 19, 20 and 21
orf19.5228	0.5545	0.0329479	RIB3	orf19.12693|orf6.2440|IPF10407.2|IPF18577.2|Contig4-1973_0005|orf6.3689|CA1111|CaO19.5228|RIB3.5f	3,4-Dihydroxy-2-butanone 4-phosphate synthase; homodimeric enzyme of riboflavin biosynthesis; converts ribulose 5-phosphate to L-3,4-dihydroxy-2-butanone 4-phosphate; transcription regulated on yeast-hyphal switch, macrophage interaction
orf19.5620	0.550302	0.0117675		orf19.13065|IPF18418.1|IPF12436.3|Contig4-2504_0003|orf6.212|orf6.4779|CA2756|PHZ1|CaO19.5620|IPF18418	Predicted ORF in Assemblies 19, 20 and 21; regulated by Gcn4p; induced in response to amino acid starvation (3-aminotriazole treatment); increased transcription is observed upon benomyl treatment or in an azole-resistant strain that overexpresses MDR1
orf19.3325	0.550121	0.0330044		orf19.10835|IPF8321|IPF23923.1|IPF8321.2|Contig4-2976_0016|Contig4-2976_0018|orf6.5029|CA2938|GLG21|CaO19.3325|CaO19.10835	Protein described as glycogen synthesis initiator; regulated by Efg1p and Efh1p; Hog1p-downregulated; shows colony morphology-related gene regulation by Ssn6p; increased expression in response to prostaglandins
orf19.4056	0.548762	3.15134e-05	GAT2	orf19.11538|IPF23188.1|IPF7666.2|Contig4-2593_0012|orf6.2451|CA1120|CaO19.11538|CaO19.4056|IPF7666	Putative DNA-binding transcription factor; similar to S. cerevisiae Gat2p; transposon mutation affects filamentous growth
orf19.7251	0.547829	0.0138356	WSC4	IPF5256.1|Contig4-2986_0002|orf6.8151|CA5369|CaO19.7251	Transcription is specific to white cell type
orf19.2132	0.547628	0.0480063		orf19.9679|IPF25191.1|IPF12241.1|Contig4-2687_0003|orf6.5366|CA3181|CaO19.9679|CaO19.2132|IPF12241	Predicted ORF in Assemblies 19, 20 and 21; possibly spurious ORF (Annotation Working Group prediction)
orf19.5373	0.547006	0.0146845		IPF6237.2|Contig4-2964_0003|orf6.4027|CA2217|CaO19.5373|POL98|POL0	Predicted ORF from Assembly 19; orf19.5372 and orf19.5373 are similar to the Tca2 (pCal) retrotransposon, which is present in strain hOG1042 as 50 to 100 copies of a linear dsDNA; clade-associated gene expression; removed from Assembly 20
orf19.4048	0.543979	0.0417793	DES1	orf19.11530|IPF23266.1|IPF7227.2|Contig4-2715_0008|orf6.4414|CA2493|CaO19.11530|CaO19.4048|IPF7227	Putative delta-4 sphingolipid desaturase
orf19.7196	0.540603	0.0019194		PRB1|IPF2144.1|Contig4-3097_0044|Contig4-3097_0045|orf6.8096|CA5322|CaJ7.0441|CaO19.7196|PRB12|CaO19_7196|CaJ7_0441	Protein described as a vacuolar protease; upregulated in the presence of human neutrophils
orf19.1999	0.538277	0.00846186		orf19.9550|IPF18279.2|IPF4751.2|Contig4-2876_0002|orf6.6361|CA3943|CaO19.9550|CaO19.1999|IPF4751	Predicted ORF in Assemblies 19, 20 and 21
orf19.3355	0.537941	0.0212389	ISN1	orf19.10863|IPF4824.1|IPF28805.1|Contig4-2331_0002|orf6.1924|orf6.2293|CA1020|CaO19.3355|IPF4824	Putative inosine 5'-monophosphate 5'-nucleotidase; fungal-specific (no human or murine homolog)
orf19.2069	0.535139	0.0268287	SMF3	orf19.9616|IPF25259.1|IPF1207.1|SMF2|Contig4-3072_0013|Contig4-3072_0014|orf6.7486|CA4827|CaO19.9616|CaO19.2069	Protein described as vacuolar iron transporter; alkaline upregulated; caspofungin repressed; transcriptionally activated by Mnl1p under weak acid stress
orf19.2242	0.535	0.0325739	PRB1	orf19.9783|orf6.1035|PRB2|IPF12896.2|IPF29156.1|Contig4-2561_0002|orf6.2390|CA0270|CaO19.2242|PRB11	Putative endoprotease B; regulated by heat, carbon source (GlcNAc-induced), nitrogen, macrophage response, human neutrophils; putative D200-H232-S389 catalytic triad; similar to (but does not replace) S. cerevisiae vacuolar B protease Prb1p
orf19.6637	0.534703	0.0393492		orf19.13958|IPF20518.1|IPF2523.2|Contig4-2856_0009|orf6.6534|CA4081|CaO19.13958|CaO19.6637|IPF2523	Predicted ORF in Assemblies 19, 20 and 21
orf19.4998	0.533993	0.0116229		orf19.12465|IPF22198.1|IPF1798.2|orf6.8011|CA5264|CaO19.4998|CHA4|CaO19.12465|IPF1798	Predicted ORF in Assemblies 19, 20 and 21; caspofungin repressed
orf19.6387	0.533902	0.0486239	HSP104	orf19.13747|IPF5137.2|IPF27720.1|IPF18323.2|Contig4-2922_0008|orf6.7865|orf6.5839|CA6306|CA5135|orf19.6389|HSP104.3f	Functional homolog of S. cerevisiae Hsp104p; has chaperone and prion propagation activity in S. cerevisiae; guanidine-insensitive; heat shock/stress induced; downregulated in biofilm upon treatment with farnesol; no human or murine homolog
orf19.6983	0.529098	2.39371e-05		IPF2997.1|Contig4-2787_0006|orf6.7729|CA5029|CaO19.6983|IPF2997	Predicted ORF in Assemblies 19, 20 and 21; repressed by nitric oxide
orf19.4907	0.528571	0.00645316		orf19.12373|IPF22400.1|IPF17283.2|Contig4-2762_0012|orf6.3754|CA2021|CaO19.12373|CaO19.4907|IPF17283	Predicted ORF in Assemblies 19, 20 and 21; increased transcription is observed upon fluphenazine treatment; possibly transcriptionally regulated by Tac1p; induced by nitric oxide; fungal-specific (no human or murine homolog)
orf19.2414	0.523311	0.023181		orf19.9952|IPF24922.1|IPF14994.2|Contig4-2124_0007|orf6.40|orf6.5179|CA0005|CaO19.2414|IPF14994	Predicted ORF in Assemblies 19, 20 and 21
orf19.2050	0.521153	0.00351538		orf19.9598|IPF25254.1|IPF7463.2|Contig4-3065_0016|Contig4-3065_0018|orf6.5989|CA3658|TGL1|CaO19.2050|CaO19.9598	Predicted ORF in Assemblies 19, 20 and 21
orf19.4444	0.51596	0.000129528	PHO15	orf19.11924|IPF22814.1|IPF3094.1|Contig4-2907_0015|orf6.7257|CA4657|CaO19.4444|PHO131|CaO19.11924|IPF3094	Protein described as 4-nitrophenyl phosphatase; hyphal downregulated; induced in core stress response; induced by heavy metal (cadmium) stress via Hog1p
orf19.675	0.515145	0.0166586		orf19.8292|orf6.131|IPF7692.2|IPF3964.2|Contig4-2917_0017|orf6.6568|CA4111|CaO19.675|IPF3964	Similar to cell wall proteins; induced in core stress response, core caspofungin response; iron-regulated; amphotericin B induced; regulated by Cyr1p, Ssn6p; possibly spurious ORF (Annotation Working Group prediction)
orf19.5005	0.515088	0.00423686	OSM2	orf19.12472|IPF22234.1|IPF1808.1|Contig4-3061_0016|orf6.8004|CA5259|CaO19.12472|OSM1|CaO19.5005	Protein described as mitochondrial fumarate reductase; regulated by Ssn6p, Gcn2p, and Gcn4p; Hog1p-downregulated; protein detected by mass spec in stationary phase cultures
orf19.7214	0.514141	0.0468154		IPF885.1|Contig4-3017_0021|orf6.8114|CA5339|CaO19.7214|IPF885	Similar to glucan 1,3-beta-glucosidase; regulated by Nrg1p, Tup1p; possibly regulated by Tac1p; induced upon biofilm formation; induced by nitric oxide; induced during cell wall regeneration; detected by mass spec in stationary phase
orf19.1654	0.512192	0.0278		orf19.9223|IPF25652.1|IPF20085.1|Contig4-2710_0007|orf6.3139|CaO19.1654|CaO19.9223	Predicted ORF in Assemblies 19, 20 and 21; increased expression in response to prostaglandins
orf19.5079	0.512014	0.000512932	CDR4	orf19.12545|IPF22170.1|IPF10349.2|orf6.6297|CA3895|CaO19.12545|CaO19.5079	Putative transporter of ATP-binding cassette (ABC) superfamily; fluconazole, Sfu1p, Hog1p, core stress response induced; caspofungin repressed; fluconazole resistance is not affected by mutation or correlated with expression
orf19.411	0.507207	6.40147e-05		orf19.8041|IPF4905|orf6.2096|IPF26877.1|IPF4905.2|Contig4-3004_0007|CA0899|CaO19.8041|CaO19.411	Protein described as similar to GTPase regulators; possibly spurious ORF (Annotation Working Group prediction); transcriptionally regulated by iron; expression greater in low iron; transcriptionally activated by Mnl1p under weak acid stress
orf19.1433	0.504503	0.0245332		orf19.9007|IPF25891.1|IPF19066.1|orf6.1039|CA0273|CaO19.9007|CaO19.1433|IPF19066	Predicted ORF in Assemblies 19, 20 and 21; shows colony morphology-related gene regulation by Ssn6p
orf19.2372	0.50244	0.0259821		orf19.9908|IPF24953.1|IPF29132.1|Contig4-2898_0014|orf6.4027|orf6.4770|orf6.6008|CaO19.2372|POL99|CaO19.9908	Putative Pol protein of retrotransposon Tca2; separated by a stop codon from Gag protein orf19.2371; both likely translated as single polyprotein that includes nucleocapsid-like protein (Gag), reverse transcriptase, protease, and integrase
orf19.7166	0.500099	0.0296938		IPF2186.1|Contig4-3097_0006|orf6.8066|CA5301|CaJ7.0473|CaO19_7166|CaJ7_0473|CaO19.7166|IPF2186	Predicted ORF in Assemblies 19, 20 and 21; increased transcription is observed in an azole-resistant strain that overexpresses MDR1; transcriptionally activated by Mnl1p under weak acid stress
orf19.539	0.498227	0.0105233	LAP3	orf19.8172|orf6.6751|IPF26781.1|IPF4292.2|CA4250|CaO19.8172|CaO19.539|IPF4292	Protein described as an aminopeptidase; transcription is positively regulated by Sfu1p; transcription is repressed in response to alpha pheromone in SpiderM medium; clade-associated gene expression; virulence-group-correlated expression
orf19.7297	0.496279	0.00266513		IPF2837.2|Contig4-2774_0001|Contig4-2774_0012|orf6.8378|CA5536|CaO19.7297|IPF2837	Predicted ORF in Assemblies 19, 20 and 21; Hog1p-induced; Gcn4p-regulated; protein level decreased in stationary phase cultures
orf19.6527	0.494108	0.00158925		orf19.13880|IPF20693.1|IPF13607.2|Contig4-2478_0007|orf6.7633|CA4951|CaJ7.0221|CaJ7_0221|CaO19_6527|PRM10|CaO19.6527|CaO19.13880|IPF13607	Predicted ORF in Assemblies 19, 20 and 21; shows colony morphology-related gene regulation by Ssn6p; transcriptionally activated by Mnl1p under weak acid stress
orf19.1974	0.493739	0.000772683	TFS1	orf19.9530|IPF8684.2|IPF6281.2|Contig4-2794_0009|orf6.1410|orf6.1861|CA0748|CaO19.1974|IPF6281.1	Transcription is regulated upon yeast-hyphal switch; shows colony morphology-related gene regulation by Ssn6p
orf19.125	0.492695	0.000346367	EBP1	orf19.7772|Contig4-2900_0026|IPF7044.2|IPF29953.1|orf6.2606|CA1216|CaO19.125	NADPH oxidoreductase; interacts with phenolic substrates, such as 17beta-estradiol; possible role in response to estrogen; induced by oxidative and weak acid stress, nitric oxide, benomyl; activated by Cap1p, Mnl1p; no mammalian homolog
orf19.2608	0.485027	0.0356432	ADH5	orf19.10139|IPF24761.1|IPF15671.2|Contig4-2025_0002|orf6.4277|CA2391|CaO19.10139|SAD1|CaO19.2608	Putative alcohol dehydrogenase; soluble protein in hyphae; expression is regulated upon white-opaque switching; fluconazole-induced; antigenic during murine systemic infection; regulated by Nrg1p, Tup1p; macrophage-downregulated protein
orf19.1381	0.482515	0.007273		orf19.8961|IPF25947.1|IPF14545.2|orf6.4167|CA2314|LSB5|CaO19.1381|CaO19.8961|IPF14545	Predicted ORF in Assemblies 19, 20 and 21
orf19.4013	0.482138	9.82506e-05		orf19.11496|IPF23252.1|IPF3352.2|Contig4-3094_0040|orf6.7426|CA4780|CaO19.11496|CaO19.4013|IPF3352	Predicted ORF in Assemblies 19, 20 and 21
orf19.391	0.476352	0.0415493	UPC2	orf19.8021|IPF26909.1|IPF7289.2|Contig4-3031_0016|Contig4-3031_0018|orf6.6273|CA3878|CaO19.8021|ECM22|CaO19.391|IPF7289	Transcriptional regulator of ergosterol biosynthetic genes and sterol uptake; binds ERG2 promoter; has Zn(2)-Cys(6) binuclear cluster; induced upon ergosterol depletion, by azoles, anaerobicity; macrophage/pseudohyphal-repressed
orf19.1034	0.472638	1.74132e-05		orf19.8636|IPF18786.2|IPF6156.1|Contig4-2952_0020|orf6.3217|orf6.2323|CA1625|CaO19.1034|IPF6156	Predicted ORF in Assemblies 19, 20 and 21; caspofungin repressed
orf19.2762	0.47166	0.0460468	AHP1	orf19.10278|orf6.6590|IPF24637.1|IPF6629.2|IPF6629|Contig4-2938_0023|CA4127|AHP11|CaO19.2762|CaO19.10278	Putative alkyl hydroperoxide reductase; immunogenic in mouse; biofilm-induced; fluconazole-induced; amphotericin B, caspofungin, alkaline downregulated; induced in core stress response; regulated by Ssk1p, Nrg1p, Tup1p, Ssn6p, Hog1p
orf19.2262	0.458992	0.000391924		orf19.9802|IPF25057.1|IPF11105.2|Contig4-2843_0016|orf6.5884|CA3578|ZTA1|CaO19.2262|CaO19.9802|IPF11105	Predicted ORF in Assemblies 19, 20 and 21; similar to quinone oxidoreductases; increased transcription is observed upon benomyl treatment; induced by nitric oxide; oxidative stress-induced via Cap1p
orf19.3131	0.457386	0.0018728	OYE32	orf19.10643|IPF7817|IPF24176.1|IPF7817.2|Contig4-2291_0001|orf6.5868|CA3564|OYE99|CaO19.3131|CaO19.10643	Protein of NAD(P)H oxidoreductase family; induced by nitric oxide, amphotericin B, oxidative stress (via Cap1p); increased transcription associated with MDR1 overexpression or benomyl treatment; macrophage-downregulated protein abundance
orf19.5818	0.452961	0.0393811	SUR2	orf19.13240|IPF21401.1|IPF5688.1|Contig4-2836_0010|orf6.4041|CA2225|CaO19.13240|CaO19.5818	Protein described as similar to ceramide hydroxylase; predicted enzyme of sphingolipid biosynthesis; upregulated in biofilm; regulated by Tsa1p, Tsa1Bp under H2O2 stress conditions
orf19.6640	0.447195	0.0229418	TPS1	orf19.13961|IPF20512.1|IPF5016.2|Contig4-3035_0004|Contig4-3035_0005|orf6.6537|CA4084|CaO19.6640|CaO19.13961	Trehalose-6-phosphate synthase; role in hyphal growth and virulence in mouse systemic infection; upregulated in presence of human neutrophils; macrophage/pseudohyphal-repressed after 16h; detected by mass spec in stationary phase cultures
orf19.4752	0.445117	4.20104e-05	MSN4	orf19.12215|IPF22377.1|IPF9939.2|Contig4-1898_0007|Contig4-2609_0002|orf6.4022|CA2214|CaO19.12215|CaO19.4752|IPF9939	Putative zinc finger transcription factor; similar to S. cerevisiae Msn4p, but not a significant stress response regulator in C. albicans; partly complements STRE-activation defect of S. cerevisiae msn2 msn4 double mutant
orf19.5323	0.442696	0.000234538	MDH1-3	orf19.12783|IPF21860.1|IPF807.1|MDH12|Contig4-2899_0003|orf6.8312|CA5489|MDH3|CaO19.12783|CaO19.5323	Predicted malate dehydrogenase; farnesol regulated
orf19.7676	0.441615	0.00988233	XYL2	IPF4959.1|Contig4-3003_0002|orf6.9024|CA6057|CaO19.7676|IPF4959	Protein described as similar to D-xylulose reductase; immunogenic in mouse; soluble protein in hyphae; Hog1p-induced; induced during cell wall regeneration; caspofungin or fluconazole-induced; Mnl1p-induced in weak acid stress
orf19.633	0.436125	0.00370962		IPF26671.1|IPF11379.2|IPF19271.1|Contig4-2129_0003|orf6.444|CA0081|IPF11379	Protein described as a putative methyltransferase; decreased expression in hyphae compared to yeast-form cells; expression regulated during planktonic growth
orf19.7479	0.434781	0.0102249	NTH1	orf6.8731|NTC1|IPF2490.1|Contig4-2988_0007|CA5824|CaO19.7479	Neutral trehalase; hyphal induction in homozygous null mutant is delayed but not reduced overall; not required for virulence in mouse systemic infection; homodimeric enzyme; possible regulatory cAMP-dependent phosphorylation at S10 and S213
orf19.4737	0.432319	0.000579232	TPO3	orf19.12199|orf6.3649|YPR156|YGR138|DHA12|IPF11759.2|IPF10646.3|Contig4-2892_0021|orf6.2088|CA1943|IPF11759|CaO19.4737|IPF11759.3f	Possible role in polyamine transport; MFS-MDR family; transcription induced by Sfu1p, regulated upon white-opaque switching; decreased expression in hyphae compared to yeast-form cells; regulated by Nrg1p; fungal-specific
orf19.691	0.425887	0.00296914	GPD2	orf19.8310|IPF26632.1|IPF11982.1|Contig4-2418_0003|orf6.1984|CA0824|CaO19.691|CaO19.8310	Similar to glycerol 3-P dehydrogenases; regulated by Ssn6p (colony morphology-related), Nrg1p, Efg1p; induced upon osmotic and oxidative stress (via Hog1p), cell wall regeneration, macrophage/pseudohyphal growth, core stress response
orf19.682	0.424009	0.0431923		orf19.8300|IPF7715.3|IPF29744.1|Contig4-2776_0014|orf6.1793|orf6.3697|CA0706|CaO19.682|IPF7715.3eoc|IPF7715|IPF7715.2	Predicted ORF from Assembly 19; ketoconazole-induced; fluconazole-downregulated; induced in a cyr1 homozygous null mutant; shows colony morphology-related gene regulation by Ssn6p; merged with orf19.2296 in Assembly 20
orf19.2371	0.422449	0.00173561		orf19.9907|IPF24948.1|IPF29129.1|Contig4-2369_0001|orf6.4769|GAG1|CaO19.9907|CaO19.2371	Putative Gag protein of retrotransposon Tca2; separated by a stop codon from Pol protein orf19.2372; both likely translated as single polyprotein that includes nucleocapsid-like protein (Gag), reverse transcriptase, protease, and integrase
orf19.5348	0.418838	0.0328013	TPS3	orf19.12808|IPF21920.1|IPF753.1|Contig4-3102_0037|orf6.8337|CA5505|TPS3.3	Protein described as regulatory subunit of trehalose-phosphate synthase; regulated by Efg1p; biofilm-repressed expression; regulated by Tsa1p, Tsa1Bp under H2O2 stress conditions
orf19.7227	0.410214	0.0130953		IPF857.1|Contig4-3043_0017|orf6.8127|CA5351|CaO19.7227|YPI1|IPF857	Predicted ORF in Assemblies 19, 20 and 21; mutation confers hypersensitivity to toxic ergosterol analog
orf19.1153	0.405066	0.00266857	GAD1	orf19.8745|IPF11712.3|IPF7609.1|Contig4-2834_0001|orf6.2779|orf6.3128|CA1564|CaO19.1153	Protein described as glutamate decarboxylase; macrophage-downregulated gene; alkaline downregulated; amphotericin B induced; transcriptionally activated by Mnl1p under weak acid stress
orf19.6757	0.403429	0.00732902	GCY1	orf19.14049|IPF20388.1|IPF3485.1|Contig4-2141_0004|Contig4-2255_0006|orf6.8874|CA5940|CaO19.14049|CaO19.6757|IPF3485	Predicted ORF in Assemblies 19, 20 and 21; mutation confers hypersensitivity to toxic ergosterol analog; farnesol-downregulated; protein detected by mass spec in stationary phase cultures
orf19.7021	0.402412	0.0309632	GPH1	orf6.7947|IPF2357.1|Contig4-3091_0021|Contig4-3091_0022|Contig4-3091_0024|CA5206|CaJ7.0111|CaO19.7021	Putative glycogen phosphorylase; gene regulated by Ssk1p, Mig1p, and Tup1p; fluconazole-induced; localizes to cell surface of hyphal cells, but not yeast-form cells; S. cerevisiae Gph1p is a stress-regulated protein of glycogen metabolism
orf19.5372	0.400953	0.00174405		IPF6235.2|Contig4-2964_0004|orf6.4026|CA2216|CaJ7.0303|CaO19.5372|GAG4|IPF6235	Predicted ORF from Assembly 19; orf19.5372 and orf19.5373 are similar to the Tca2 (pCal) retrotransposon, which is present in strain hOG1042 as 50 to 100 copies of a linear dsDNA; removed from Assembly 20; transcription is Tbf1p-activated
orf19.6116	0.378998	0.0294395	GLK4	orf19.13535|IPF8388.2|IPF20985.1|IPF18395.1|Contig4-1499_0003|Contig4-2916_0003|orf6.1017|orf6.5097|orf19.1408|CaO19.13535|CaO19.6116	Protein described as a glucokinase; decreased expression in hyphae compared to yeast-form cells
orf19.2959.1	0.377223	0.0219031		IPF24404.1|IPF4430.1|CA4174|IPF4430|IPF4119.5	ORF Predicted by Annotation Working Group
orf19.2248	0.36749	0.0107665	ARE2	orf19.9788|IPF10109.2|IPF10110.1|Contig4-2290_0009|orf6.5898|CA3590|CaO19.9788|CaO19.2248	Acyl CoA:sterol acyltransferase (ASAT); uses cholesterol and oleoyl-CoA substrates; protoberberine derivative drug inhibits enzyme activity; 7 putative transmembrane regions; ketoconazole-induced
orf19.13	0.354389	0.00725055		orf19.7686|IPF27232.1|IPF11564.1|IPF8388.2|Contig4-1499_0002|orf6.1703|orf6.1017|CA0263|GLK1|GLK2|CaO19.13|CaO19.7686	Putative glucokinase; regulated upon yeast-hyphal switch; regulated by Efg1p; fluconazole-induced; induced in core stress response; shows colony morphology-related gene regulation by Ssn6p; merged with orf19.734 in Assembly 20
orf19.1408	0.354121	0.00119961		IPF8388.2|Contig4-2916_0003|orf6.1017|CaO19.1408|GLK3	Predicted ORF from Assembly 19; merged with orf19.6116 in Assembly 20
orf19.915	0.35238	0.00280935		IPF17975.2|orf6.568|CA0116|CaO19.915|IPF17975	Predicted ORF in Assemblies 19, 20 and 21
orf19.5525	0.350049	0.0011437		orf19.12971|IPF4328|IPF4328.2|IPF27985.1|Contig4-2118_0001|Contig4-2690_0006|orf6.4467|orf6.871|CA0210|CaO19.5525	Protein abundance is affected by URA3 expression in the CAI-4 strain background; regulated by Efg1p and Efh1p; repressed by Rgt1p; protein detected by mass spec in exponential and stationary phase cultures
orf19.734	0.341865	0.00566217	GLK1	orf19.7686|orf19.8353|IPF27232.1|IPF11564.1|IPF26579.1|IPF16544.2|Contig4-1499_0002|Contig4-2506_0004|orf6.1703|orf6.6009|CA0263|orf19.13|CaO19.734|CaO19.8353	Putative glucokinase; transcription is regulated upon yeast-hyphal switch; transcriptionally regulated by Efg1p; fluconazole-induced; induced in core stress response; shows colony morphology-related gene regulation by Ssn6p
orf19.2969	0.338302	0.0250516	RAD16	orf19.10486|IPF24246.1|IPF15502.2|orf6.2120|CA0917|CaO19.10486|CaO19.2969	Protein similar to S. cerevisiae Rad16p; flucytosine induced
orf19.2048	0.336329	0.0164303		orf19.9596|orf6.5987|IPF25325.1|IPF7458.1|Contig4-3065_0023|CaO19.2048|CaO19.9596	Transcription is positively regulated by Sfu1p
orf19.7278	0.329633	0.016261		IPF18110.1|orf6.8178	Similar to a region of the Tca2 (pCal) retrotransposon, which is present in strain hOG1042 as 50 to 100 copies of a linear dsDNA
orf19.2172	0.291588	0.00857648	ARA1	orf19.9718|IPF25141.1|IPF10148.2|Contig4-3057_0027|orf6.6091|CA3746|CaO19.9718|CaO19.2172	D-Arabinose dehydrogenase; in dehydro-D-arabinono-1,4-lactone biosynthesis; NADP+ cofactor; active toward D-arabinose, L-fucose, L-xylose, L-galactose; inhibited by metal ions, thiol group-specific reagents; induced on polystyrene adherence
orf19.6660	0.280496	0.00293829		IPF2283.1|Contig4-3038_0009|orf6.6769|CA4266|CaO19.6660|IPF2283	Predicted ORF in Assemblies 19, 20 and 21
orf19.1868	0.2138	0.00717376	RNR22	orf19.9424|IPF25438.1|IPF4053.1|Contig4-3010_0006|orf6.7052|CA4492|RNR2|CaO19.9424|CaO19.1868	Protein described as ribonucleoside diphosphate reductase; shows colony morphology-related gene regulation by Ssn6p; RNA abundance regulated by tyrosol and cell density
orf19.2531	0.207836	0.0492894	CSP37	orf19.10066|orf6.2388|IPF24765.1|IPF4991.2|Contig4-2933_0007|CA1075|CaO19.10066|CaO19.2531|IPF4991	Plasma membrane, hyphal cell wall protein; role in progression of murine systemic infection; predicted P-loop, divalent cation binding, N-glycosylation sites; expressed in yeast and hyphae; hyphal downregulated; lacks S. cerevisiae homolog
orf19.1862	0.183518	1.46978e-06		orf19.9418|IPF4065|orf6.1262|IPF18208.2|IPF4065.1|Contig4-2502_0004|CA0386|CaO19.1862	Possible stress protein; increased transcription is associated with CDR1 and CDR2 overexpression or fluphenazine treatment; transcription regulated by Sfu1p, Nrg1p, Tup1p

## Sheet: mfg1_1h37C
Experiment	mfg1 mutant hyphae 1h 37C
Time	1h 37C
Systematic	Normalized	t-test P-value	Common	Synonyms	Description
orf19.4688	5.90424	0.0233519	DAG7	orf19.12157|IPF14119.1|IPF28307.1|Contig4-2733_0007|orf6.1768|CA0689|CaO19.4688|CaO19.12157|IPF14119	Predicted ORF in Assemblies 19, 20 and 21; mutation confers hypersensitivity to toxic ergosterol analog; a-specific transcription; alpha-factor induced
orf19.740	3.55735	0.0490166	HAP41	orf19.8359|IPF26555.1|IPF13319.2|Contig4-2600_0002|orf6.2411|CA1088|CaO19.740|CaO19.8359|IPF13319	Predicted ORF in Assemblies 19, 20 and 21; not required for response to low iron; possibly spurious ORF (Annotation Working Group prediction); transcriptionally activated by Mnl1p under weak acid stress
orf19.7219	3.44136	0.0466986	FTR1	orf6.8119|IPF868.1|Contig4-3043_0004|CA5345|CaO19.7219	High-affinity iron permease (ferric citrate, ferrioxamines E or B, transferrin); required for mouse virulence, low-iron growth; iron, amphotericin B, caspofungin, ciclopirox, Hog1p regulated; complements S. cerevisiae ftr1 iron transport
orf19.2917	3.33748	0.0363754		orf19.10434|IPF24432.1|IPF16748.2|Contig4-2802_0011|orf6.3461|CA1803|CaO19.10434|CaO19.2917|IPF16748	Putative protein of unknown function; heterozygous null mutant exhibits resistance to parnafungin in the C. albicans fitness test; predicted ORF in Assemblies 19, 20 and 21
orf19.54	3.1344	0.0186277	RHD1	orf19.7715|IPF27198.1|IPF13148.2|Contig4-2469_0001|orf6.4552|CA2597|BMT2|WRY7|CaO19.7715|CaO19.54|IFQ3	Putative beta-mannosyltransferase, required for the addition of beta-mannose to the acid-labile fraction of cell wall phosphopeptidomannan; member of a 9-gene family; transcriptionally regulated on yeast-hyphal and white-opaque switches
orf19.6417	2.96298	0.0354621	TSR1	orf19.13775|IPF20707.1|IPF1334.1|Contig4-3073_0011|orf6.7837|CA5114|tsr1|CaO19.13775|CaO19.6417|IPF1334	Predicted ORF in Assemblies 19, 20 and 21; decreased expression in response to prostaglandins
orf19.2717	2.95595	0.0320423	SAS10	orf19.10232|IPF24603.1|IPF6410.2|Contig4-2673_0009|orf6.2702|CA1274|CaO19.2717	Predicted ORF in Assemblies 19, 20 and 21; mutation confers resistance to 5-fluorocytosine (5-FC); repressed upon high-level peroxide stress
orf19.3682	2.91154	0.0156305	CWH8	orf19.11166|IPF23608.1|IPF10381.2|Contig4-2750_0005|orf6.2497|CA1146|CaO19.11166|CAX4|CaO19.3682	Putative dolichyl pyrophosphate (Dol-P-P) phosphatase; ketoconazole-induced; expression is increased in a fluconazole-resistant isolate; clade-associated gene expression
orf19.1222	2.78987	0.0306489		IPF15693.2|Contig4-2844_0012|orf6.850|CA0204|CaO19.1222|IKI3	Predicted ORF from Assembly 19; merged with orf19.2631 in Assembly 20
orf19.7218	2.72398	0.0302334	RBE1	PRY2|IPF872.1|Contig4-2519_0004|orf6.8118|CA5344|CaO19.7218	Putative cell wall protein; transcription is negatively regulated by Rim101p, Efg1p, Ssn6p; alkaline downregulated; predicted signal sequence, O-glycosylation; no GPI anchor predicted
orf19.4173	2.69684	0.0359467		orf19.11649|IPF16546.1|IPF23088.1|IPF6183.2|Contig4-2948_0015|orf6.814|orf6.6067|CA3723|orf19.1174|CaO19.11649|DPH2|CaO19.4173	Predicted ORF in Assemblies 19, 20 and 21
orf19.4681	2.67731	0.0296858	RAT1	orf19.12150|IPF22542.1|IPF7491.1|Contig4-2949_0009|Contig4-2949_0010|orf6.5455|CA3242|CaO19.12150|CaO19.4681	5'-->3' exoribonuclease; similar to S. cerevisiae nuclear exoribonuclease Rat1p; suppresses S. cerevisiae kem1 mutant slow growth, mating defect, and haploid invasive growth defect
orf19.4716	2.60954	0.0417527	GDH3	IPF8236.1|Contig4-2812_0004|orf6.3152|CA1579|CaO19.4716|GDH1	Protein described as similar to NADP-glutamate dehydrogenase; hyphal downregulated expression; transcription is regulated by Nrg1p, Plc1p; downregulated by Efg1p; upregulated by Rim101p at pH 8; ciclopirox olamine induced
orf19.2712	2.49554	0.0386298	HCA4	orf19.10227|IPF24582.1|IPF6418.1|Contig4-2673_0001|orf6.2728|CaO19.2712|CaO19.10227|CA1293	Putative role in regulation of biogenesis of the cell wall; upregulated in biofilm
orf19.220	2.49533	0.000996465	PIR1	orf19.7851|orf6.474|PIR2|IPF15363.2|IPF19968.1|orf6.5153|CA3030|CaO19.220|IPF19968	Structural protein of cell wall; 1,3-beta-glucan-linked; O-glycosylated by Pmt1p; N-mannosylated; tandem repeats; heterozygous mutant has cell wall defects; hyphal repressed; Hog1p, fluconazole, hypoxia induced; iron, Efg1p, Plc1p regulated
orf19.2711	2.48536	0.00553085		orf19.10226|IPF24584.1|IPF16752.2|Contig4-2190_0002|orf6.2727|CA1291|CaO19.10226|ELP2|CaO19.2711|IPF16752	Predicted ORF in Assemblies 19, 20 and 21; downregulated in core stress response
orf19.655	2.47075	0.00861142	PHO84	orf19.8269|orf19.8765|IPF26171.1|IPF7638.2|IPF26640.1|IPF5438.2|orf6.447|orf6.3437|CA1782|CA0083|orf19.1172|PHO84.5eoc	Protein similar to high-affinity phosphate transporters; expression is regulated upon white-opaque switching or biofilm formation; Hog1p, ciclopirox olamine or alkaline induced; caspofungin or stress repressed; upregulated in RHE model
orf19.1250	2.42444	0.0386336		orf19.8834|IPF26082.1|IPF16428.2|orf6.3009|CA1479|CaO19.1250|CaO19.8834|IPF16428	Predicted ORF in Assemblies 19, 20 and 21
orf19.5267	2.41875	0.000115383		orf19.12732|IPF21970.1|IPF2053.1|Contig4-3082_0012|orf6.7675|CA4983|CaO19.12732|CaO19.5267|IPF2053	Putative cell wall protein; downregulated in core caspofungin response; transcription is repressed in response to alpha pheromone in SpiderM medium; transcription repressed in ace2 null mutant
orf19.2671	2.38556	0.00130346		orf19.10186|orf6.154|IPF24612.1|IPF10564.2|Contig4-2584_0001|orf6.5563|CA3328|CaO19.2671|CaO19.10186|IPF10564	Predicted ORF in Assemblies 19, 20 and 21; Plc1p-regulated
orf19.7618	2.37889	0.0492162		IPF630.1|Contig4-3108_0080|orf6.8966|CA6016|CaO19.7618|IPF630	Predicted ORF in Assemblies 19, 20 and 21; Plc1p-regulated
orf19.1174	2.36784	0.0209045		IPF16546.1|orf6.814|DPH2|CaO19.1174	Predicted ORF from Assembly 19; merged with orf19.4173 in Assembly 20
orf19.4705	2.34782	0.00453235		orf19.12176|IPF19340.2|IPF4444.2|Contig4-2960_0015|orf6.327|orf6.3516|CCA1|CaO19.4705|CA1841	Predicted ORF in Assemblies 19, 20 and 21
orf19.3362	2.34505	5.63925e-05		orf19.10870|IPF23891.1|IPF15758.2|Contig4-2353_0001|orf6.1783|CaO19.10870|CaO19.3362	Predicted ORF in Assemblies 19, 20 and 21
orf19.4459	2.2874	0.035295		orf19.11939|IPF22769.1|IPF11849.2|Contig4-2719_0006|Contig4-2719_0007|orf6.2833|YNL234W|CA1365|CaO19.4459|CaO19.11939|IPF11849	Predicted ORF in Assemblies 19, 20 and 21; similar to S. cerevisiae Ynl234wp, which is a putative heme-binding stress-related protein; transposon mutation affects filamentous growth
orf19.1306	2.25231	0.0255912		orf19.8886|IPF26019.1|IPF6679.1|orf6.2774|CA1326|CaO19.8886|CaO19.1306|IPF6679	Predicted ORF in Assemblies 19, 20 and 21
orf19.5010	2.2498	0.0148487	DIM1	orf19.12477|IPF22277.1|IPF1822.1|Contig4-3061_0009|orf6.7999|CA5252|CaO19.5010|CaO19.12477	Protein likely to be essential for growth, based on an insertional mutagenesis strategy; similar to S. cerevisiae Dim1p, which is an 18S rRNA dimethylase involved in rRNA modification and processing; induced upon biofilm formation
orf19.2758	2.24591	0.0403595	PGA38	orf19.10273|orf19.10272|IPF11998.3|IPF17815.2|orf6.1331|orf6.3591|orf6.1332|orf6.3590|CA1898|orf19.2759|IPF11998|IPF11998.2	Putative GPI-anchored protein of unknown function; repressed during cell wall regeneration
orf19.1300	2.24591	0.0222377		orf19.8880|IPF13552.2|IPF29494.1|Contig4-2781_0017|orf6.1387|CA0453|CaO19.1300|IPF13552	Predicted ORF in Assemblies 19, 20 and 21
orf19.111	2.23192	0.0161608	CAN2	orf19.7758|IPF27165.1|IPF11927.1|Contig4-2501_0008|orf6.2565|CAN1|CaO19.111|CaO19.7758|CA1191|CA1192|IPF11926|IPF11926.1	Putative amino acid permease; transcription is regulated by Nrg1p and Tup1p; caspofungin induced; flucytosine induced; shows colony morphology-related gene regulation by Ssn6p; ; fungal-specific (no human or murine homolog)
orf19.6420	2.21875	0.0172957	PGA13	orf19.13778|IPF20734.1|IPF1341.1|Contig4-3073_0004|orf6.7834|CA5112|CaO19.6420|CaO19.13778|IPF1341	Putative GPI-anchored protein; described as similar to mucins; induced during cell wall regeneration, and during core caspofungin response; regulated by Tsa1p, Tsa1Bp in minimal media at 37 deg and by Cyr1p, Nrg1p, Tup1p, Rlm1p
orf19.1253	2.21704	0.00192719		orf19.8838|IPF14649.2|IPF10541.2|Contig4-2799_0001|orf6.3005|orf6.5720|CA3452|CaO19.1253|IPF10541	Predicted ORF in Assemblies 19, 20 and 21; transcriptionally activated by Mnl1p under weak acid stress
orf19.4190	2.19634	0.0174592		orf19.11667|IPF23106.1|IPF7999.1|Contig4-2846_0003|orf6.3647|CA1940|PAM18|CaO19.11667|CaO19.4190|IPF7999	Predicted ORF in Assemblies 19, 20 and 21
orf19.2942	2.17376	0.0201831	DIP5	orf19.10459|orf19.10460|IPF24319.1|IPF24337.1|IPF8123.2|IPF10236.2|DIP51|Contig4-2841_0016|orf6.4006|orf6.4007|CA2203|CA2204|orf19.2943|DIP52|DIP51.3f	Putative permease for dicarboxylic amino acids; mutation confers hypersensitivity to toxic ergosterol analog; transcriptionally induced upon phagocytosis by macrophage; Gcn4p-regulated; upregulated by Rim101p at pH 8
orf19.3103	2.17239	0.0247103		orf19.10615|IPF24220.1|IPF13155.2|Contig4-2940_0002|Contig4-2940_0003|orf6.6942|CA4407|CaO19.3103|RPO3|RPO31	Predicted ORF in Assemblies 19, 20 and 21
orf19.4697	2.16468	0.019897	MDN1	orf19.12167|IPF22610.1|IPF11189.3|Contig4-1657_0002|Contig4-1657_0003|Contig4-2496_0003|orf6.1058|orf6.1684|orf6.1709|orf6.759|CA0283|CaO19.4697|IPF18034|IPF18034.2	Protein induced during the mating process
orf19.610	2.16343	0.0236222	EFG1	IPF3577.2|IPF3575.2|Contig4-2215_0003|orf6.2978|orf6.4821|CA2787|orf19.8243	Transcriptional repressor; required for white-phase cell type; hyphal growth, metabolism, cell-wall gene regulator; roles in adhesion, virulence; Cph1p and Efg1p have role in host cytokine response; bHLH; binds E-box; T206 phosphorylated
orf19.3141	2.15549	0.0398652		orf19.10653|IPF18322.2|IPF3261.2|Contig4-3009_0007|orf6.1852|orf6.5878|CA0741|SMY2|CaO19.3141|IPF3261	Predicted ORF in Assemblies 19, 20 and 21
orf19.3367	2.14667	0.00592506		orf19.10875|IPF10399.1|IPF16677.2|Contig4-2386_0001|orf6.2578|orf6.2893|CA1198|MRPL22|CaO19.3367|IPF10399	Predicted ORF in Assemblies 19, 20 and 21
orf19.1362	2.14486	0.0253756	SMM1	orf19.8942|IPF25948.1|IPF8910.2|Contig4-2717_0007|orf6.5294|CA3131|CaO19.8942|CaO19.1362|IPF8910	Predicted ORF in Assemblies 19, 20 and 21; transcription is upregulated in both intermediate and mature biofilms
orf19.4176	2.12636	0.0337461		orf19.11652|IPF23099.1|IPF6175.1|Contig4-2228_0001|orf6.6070|CA3726|MRPS17|CaO19.4176|CaO19.11652|IPF6175	Predicted ORF in Assemblies 19, 20 and 21
orf19.7586	2.12	0.00875235	CHT3	IPF696.1|Contig4-3108_0002|orf6.8934|CA5987|CaO19.7586	Chitinase, major; functional homolog of S. cerevisiae Cts1p; 4 N-glycosylation motifs; possible O-mannosylated region; putative signal peptide; hyphal-repressed; farnesol upregulated in biofilm; regulated by Efg1p, Cyr1p, Ras1p
orf19.3797	2.09098	0.0482846		orf19.11278|IPF14249.2|IPF6901.3|Contig4-2569_0002|orf6.2915|orf6.3070|CA1421|MRPL11|CaO19.3797	Predicted ORF in Assemblies 19, 20 and 21
orf19.2360	2.0861	0.0428495	URA2	orf19.9896|IPF10801.3|IPF29131.1|Contig4-2886_0007|Contig4-2886_0008|orf6.2755|orf6.610|CA1315|CaO19.2360|URA2.5eoc|IPF10801.2	Predicted ORF in Assemblies 19, 20 and 21; flucytosine induced; macrophage/pseudohyphal-induced; intron in 5'-UTR
orf19.2003	2.07587	0.00334125	HNM1	orf19.9554|IPF4757.1|IPF19469.2|Contig4-2862_0011|orf6.42|orf6.6357|CA3939|HNM2|CaO19.2003	Predicted ORF in Assemblies 19, 20 and 21; mutation confers hypersensitivity to toxic ergosterol analog; shows colony morphology-related gene regulation by Ssn6p; clade-associated gene expression
orf19.7215	2.06249	0.0313572		IPF883.1|Contig4-3017_0022|orf6.8115|CA5340|CaO19.7215|IPF883	Predicted ORF in Assemblies 19, 20 and 21
orf19.4582	2.04198	0.0227246		orf19.12051|IPF22629.1|IPF1018.1|Contig4-3104_0032|orf6.7881|CA5145|SKI6|CaO19.4582|CaO19.12051	Predicted ORF in Assemblies 19, 20 and 21
orf19.4159	2.04066	0.0155949		orf19.11635|IPF23093.1|IPF15660.2|Contig4-1990_0003|orf6.2623|CA1226|CaO19.4159|CaO19.11635|IPF15660	Predicted ORF in Assemblies 19, 20 and 21
orf19.1646	2.03677	0.0349651		orf19.9215|IPF11615.2|IPF29332.1|Contig4-2368_0004|orf6.2334|CA1047|MRD1|CaO19.1646|IPF11615|CA3995|IPF11615.3eoc|IPF10438.1	Predicted ORF in Assemblies 19, 20 and 21
orf19.3066	2.02945	0.00233161	ENG1	orf19.10584|IPF9751.2|IPF28933.1|Contig4-2792_0015|Contig4-2792_0016|Contig4-2952_0001|orf6.7803|YNR67|ACF3|orf19.71|DSE4|CaO19.3066|CA5091	Endo-1,3-beta-glucanase required for cell separation after division, orthologous to S. cerevisiae Dse4p; caspofungin repressed; fungal-specific (no human or murine homolog); repressed in response to alpha pheromone in SpiderM medium
orf19.6570	2.0233	0.000141517	NUP	orf19.13923|orf6.7558|IPF20601.1|IPF1651.1|Contig4-2887_0014|CA4882|CaJ7.0175|NUP32|CaO19.6570|CaO19.13923|CaJ7_0175|CaO19_6570|IPF1651	Nucleoside permease; adenosine and guanosine are substrates, whereas cytidine, adenine, guanine, uridine, uracil are not; similar to a nucleoside permease of S. pombe; possibly processed by Kex2p
orf19.4657	2.01287	0.0344145		orf19.12127|IPF22586.1|IPF12196.2|orf6.4708|CA2705|CaO19.4657|NEM1|CaO19.12127	Predicted ORF in Assemblies 19, 20 and 21
orf19.1437	2.01253	0.0203231		orf19.9011|orf6.154|IPF19556.1|orf6.1055|CaO19.1437	Transcription is negatively regulated by Sfu1p; removed from Assembly 20
orf19.6805	2.00913	6.12351e-05		orf19.14097|IPF20302.1|IPF2374.2|orf6.8826|CA5901|CaO19.14097|CaO19.6805|IPF2374	Predicted ORF in Assemblies 19, 20 and 21
orf19.4669	1.99753	0.00108633	AAT22	orf19.12139|IPF18504.2|IPF7410.2|Contig4-2599_0006|orf6.4067|CA2244|CaO19.4669|CaO19.12139	Protein not essential for viability; similar to S. cerevisiae Aat2p, which is an aspartate aminotransferase involved in nitrogen metabolism; clade-associated gene expression; protein level decreased in stationary phase cultures
orf19.1944	1.96229	0.000154474	GPR1	orf19.9499|IPF11281.2|IPF29241.1|Contig4-2985_0021|Contig4-2985_0023|orf6.5595|CA3354|CaO19.1944|CaO19.9499|CA3354 gi:30513635|IPF11281	Putative G-protein-coupled receptor of plasma membrane; required for wild-type hyphal growth; acts in cAMP-PKA pathway; reports differ on role in cAMP-mediated glucose signaling; Gpr1p C terminus binds Gpa2p; regulates HWP1 and ECE1
orf19.1528	1.96012	0.0325275		orf19.9104|IPF14920.2|IPF29413.1|Contig4-2467_0004|Contig4-2467_0005|orf6.1857|CA0745|MTF1|CaO19.9104|CaO19.1528	Predicted ORF in Assemblies 19, 20 and 21
orf19.7657	1.94288	0.0437293	POP3	IPF4924.1|Contig4-3003_0028|orf6.9005|CA6042|CaO19.7657|IPF4924	Predicted ORF in Assemblies 19, 20 and 21; decreased expression in response to prostaglandins
orf19.1830	1.93751	0.036861		orf19.9389|IPF25491.1|IPF16475.1|Contig4-1874_0001|orf6.1220|CaO19.9389|CaO19.1830	Predicted ORF in Assemblies 19, 20 and 21
orf19.6137	1.93626	0.0193401		orf19.13556|IPF20978.1|IPF12777.2|Contig4-2201_0002|orf6.5677|CA3418|CaO19.6137|CaO19.13556|IPF12777	Predicted ORF in Assemblies 19, 20 and 21
orf19.3098	1.92884	0.0154256		orf19.10610|IPF24199.1|IPF1751.2|Contig4-2877_0004|orf6.6947|CA4411|CaO19.10610|BRR2|CaO19.3098	Predicted ORF in Assemblies 19, 20 and 21
orf19.4611	1.92492	0.000588265		orf19.12081|IPF22617.1|IPF6040.1|Contig4-2931_0004|orf6.7910|CA5174|CaO19.12081|PRS4|CaO19.4611	Predicted ORF in Assemblies 19, 20 and 21
orf19.2990	1.91522	0.00254865	XOG1	orf19.10507|EXG|EXG1|IPF24307.1|IPF14073.2|Contig4-2184_0004|orf6.1982|CA0822|CaO19.2990	Exo-1,3-beta-glucanase, major exoglucanase; member of family 5 glycosyl hydrolases; affects sensitivity to inhibitors of chitin and glucan synthesis; not required for yeast-to-hyphal transition or for virulence in mouse systemic infection
orf19.7387	1.90763	0.0245272		IPF3330.1|Contig4-3036_0021|orf6.8547|CA5685|CaO19.7387|ELP3|HPA1	Predicted ORF in Assemblies 19, 20 and 21
orf19.2675	1.90188	0.00141257		orf19.10190|IPF24671.1|IPF6893.2|orf6.5559|CA3324|HSH155|CaO19.10190|CaO19.2675|IPF6893	Predicted ORF in Assemblies 19, 20 and 21
orf19.5987	1.90106	0.0494244		orf19.13408|IPF21213.1|IPF11.1|Contig4-2427_0004|orf6.9050|CA6074|CaO19.13408|CaO19.5987|IPF11	Predicted ORF in Assemblies 19, 20 and 21
orf19.5356	1.89773	0.0468181		orf19.12816|IPF21819.1|IPF741.1|Contig4-3102_0027|orf6.8345|CA5510|CaO19.12816|CaO19.5356|IPF741	Predicted ORF in Assemblies 19, 20 and 21; downregulated during core stress response
orf19.500	1.88187	0.0268631		orf19.8130|IPF26791.1|IPF15038.2|Contig4-2231_0002|orf6.7071|CA4506|CaO19.500|GCD10|CaO19.8130	Predicted ORF in Assemblies 19, 20 and 21
orf19.1249	1.87883	0.000279174		orf19.8833|IPF26083.1|IPF15577.2|Contig4-1942_0005|orf6.3010|CA1480|CaO19.8833|HIS6|CaO19.1249	Predicted ORF in Assemblies 19, 20 and 21
orf19.3869	1.87052	0.0480622		orf19.11350|IPF17190.2|IPF12184.3|Contig4-2055_0006|orf6.550|orf6.5840|CA0110|CaO19.3869|IPF17190	Predicted ORF in Assemblies 19, 20 and 21; regulated by Tsa1p, Tsa1Bp in minimal media at 37 deg; shows colony morphology-related gene regulation by Ssn6p
orf19.3840	1.86253	0.00162471		orf19.11321|IPF23489.1|IPF4087.1|Contig4-3060_0022|orf6.7535|CA4864|CaO19.11321|CaO19.3840|IPF4087	Predicted ORF in Assemblies 19, 20 and 21
orf19.7017	1.8241	0.0260624	YOX1	IPF2351.1|Contig4-3091_0036|orf6.7943|CA5202|CaJ7.0115|CaO19.7017|CaJ7_0115|CaO19_7017	Predicted ORF in Assemblies 19, 20 and 21; periodic mRNA expression, peak at cell-cycle G1/S phase
orf19.5296	1.8223	0.0483477		orf19.12755|IPF21874.1|IPF15664.2|orf6.3938|CA2160|FMP35|CaO19.12755|CaO19.5296|IPF15664	Predicted ORF in Assemblies 19, 20 and 21
orf19.3124	1.8194	0.0262729		orf19.10636|IPF24183.1|IPF12414.2|Contig4-2435_0009|orf6.6921|CA4387|CaO19.10636|MAP1|CaO19.3124	Predicted ORF in Assemblies 19, 20 and 21
orf19.1260	1.81843	0.0385549	LEA1	orf19.8845|IPF26087.1|IPF8521.1|Contig4-2968_0003|orf6.5727|CA3457|CaO19.8845|CaO19.1260|IPF8521	Protein similar to S. cerevisiae Lea1p; transcription is induced in response to alpha pheromone in SpiderM medium
orf19.2887	1.80315	0.0125439	MET13	orf19.10405|IPF10429.2|IPF28949.1|Contig4-2827_0012|orf6.1818|orf6.6135|CA0721|CaO19.2887|IPF10429	Predicted ORF in Assemblies 19, 20 and 21; ketoconazole-induced; amphotericin B repressed
orf19.6948	1.79795	0.0396621	CCC1	orf19.14210|IPF20199.1|IPF5909.2|Contig4-3085_0020|orf6.7334|CA4713|CaO19.14210|CaO19.6948	Protein described as predicted manganese transporter; alkaline downregulated; shows colony morphology-related gene regulation by Ssn6p; repressed by nitric oxide
orf19.4670	1.78841	0.0425581	CAS5	orf19.12140|IPF22550.1|IPF7414.1|Contig4-2599_0003|orf6.4066|CA2243|CaO19.12140|CaO19.4670|IPF7414	Putative zinc finger transcription factor; cell wall damage response; required for wild-type transcriptional response to caspofungin; mutant caspofungin hypersensitive; downregulated in core stress response; avirulent, reduced CFU in mice
orf19.1721	1.78666	0.0269652	NCE103	orf19.9289|IPF25642.1|IPF8405.1|Contig4-2981_0017|orf6.4839|CA2796|CaO19.9289|CaO19.1721|IPF8405	Carbonic anhydrase involved in the conversion of carbon dioxide to bicarbonate; essential for pathogenesis in host niches with limited CO2, wild-type white-opaque switching; biofilm induced; activated by Mnl1p under weak acid stress
orf19.4479	1.7838	0.0355122		orf19.11959|orf19.11960|IPF22770.1|IPF22776.1|IPF13757.2|IPF13756.2|Contig4-2664_0018|Contig4-2664_0021|orf6.4308|orf6.4307|CA2414|CA2413|orf19.4480|IPF13756.3f	Predicted ORF in Assemblies 19, 20 and 21; downregulated during core stress response
orf19.6818	1.7836	0.0294672		orf19.14110|IPF20440.1|IPF2409.2|Contig4-2745_0001|orf6.8813|CA5889|CaO19.14110|CaO19.6818|IPF2409	Predicted ORF in Assemblies 19, 20 and 21
orf19.3129	1.78038	0.0146025		orf19.10641|IPF24175.1|IPF7823.2|Contig4-2672_0010|orf6.5866|CA3562|RVB1|CaO19.10641|CaO19.3129|IPF7823	Predicted ORF in Assemblies 19, 20 and 21; heterozygous null mutant displays sensitivity to virgineone
orf19.1263	1.77652	0.045016	CFL1	orf19.8848|orf6.5730|FRE1|IPF26060.1|IPF8516.2|Contig4-2968_0009|CA3460|CaO19.8848|CaO19.1263	Protein similar to ferric reductase Fre10p; possible functional homolog of S. cerevisiae Fre1p (reports differ); transcription is negatively regulated by Sfu1p, copper, amphotericin B, caspofungin; induced by ciclopirox olamine
orf19.1291	1.76967	0.0333779	ABZ1	orf19.9352|orf19.9353|IPF10474.2|Contig4-2660_0010|Contig4-2660_0012|orf6.1155|orf6.910|orf6.1154|CA0220|orf19.1786|orf19.1787|CaO19.1291	Protein not essential for viability; similar to S. cerevisiae Abz1p, which is para-aminobenzoate (PABA) synthase; reports differ on whether a murine homolog exists
orf19.6918	1.75849	0.00491267		IPF2200.2|Contig4-2895_0007|orf6.7182|CA4599|CaJ7.0152|CaO19.6918|CaJ7_0152|CaO19_6918|IPF2200	Predicted ORF in Assemblies 19, 20 and 21
orf19.2687.1	1.75658	0.0161482		IPF24589.1|IPF7977.1|Contig4-2865_0002|CA2771|RPB10	ORF Predicted by Annotation Working Group
orf19.2760	1.75352	0.00484903		orf19.10276|IPF24586.1|IPF11996.2|Contig4-3083_0006|orf6.1333|orf6.6592|orf6.6593|CA0426|CFT1|CaO19.2760	Putative protein of unknown function; heterozygous null mutant exhibits hypersensitivity to parnafungin and cordycepin in the C. albicans fitness test; predicted ORF in Assemblies 19, 20 and 21
orf19.6856	1.74937	0.0161143		orf19.14146|IPF20259.1|IPF8467.2|Contig4-2307_0003|Contig4-2307_0004|orf6.7005|CA4459|NSP49.3f	Predicted ORF from Assembly 19; merged with orf19.748 in Assembly 20
orf19.5216	1.74889	0.0418932		orf19.12683|IPF22013.1|IPF5873.2|Contig4-3052_0020|orf6.3907|CA6221|TES4|CaO19.5216|CaO19.12683|TES14	Predicted ORF in Assemblies 19, 20 and 21
orf19.5025	1.74796	0.00975592	MET3	orf19.12492|orf6.7984|IPF22255.1|IPF3022.1|Contig4-3075_0019|Contig4-3075_0020|CA5238|CaO19.5025|CaO19.12492	Putative ATP sulfurlyase of sulfate assimilation; repressed by Met or Cys, Sfu1p, or in fluconazole-resistant isolate; strongly induced on biofilm formation, even in presence of Met and Cys; Hog1p-, caspofungin-, possibly adherence-induced
orf19.2720	1.74618	0.00328263		orf19.10235|IPF19188.2|IPF6406.2|Contig4-2673_0010|orf6.2699|orf6.675|CA1273|CCT4|CaO19.2720	Predicted ORF in Assemblies 19, 20 and 21
orf19.3759	1.74146	0.0445658		orf19.11243|IPF23508.1|IPF8898.2|Contig4-2804_0009|orf6.2265|CA1005|CaO19.11243|CaO19.3759|LPG7	Predicted ORF in Assemblies 19, 20 and 21
orf19.5032	1.74136	0.00104996	SIM1	orf19.12499|IPF22273.1|IPF10421.1|Contig4-2686_0006|orf6.7977|SUN42|CA5232|CaO19.5032|UTH1|CaO19.12499	Protein involved in cell wall maintenance, redundant with Sun41p; described as a DNA replication regulator; produced under vaginal conditions; macrophage-downregulated gene; transcription is negatively regulated by Rim101p, Cyr1p, Ras1p
orf19.3792	1.73981	0.00694447		orf19.11272|IPF16676.3|IPF6915.2|Contig4-2349_0001|orf6.3065|orf6.757|CA1523|PAT1|CaO19.3792	Predicted ORF in Assemblies 19, 20 and 21
orf19.748	1.73606	0.00448048		orf19.8368|orf19.14146|orf19.14147|IPF20259.1|IPF8467.2|IPF26549.1|IPF16922.2|Contig4-2307_0003|Contig4-2307_0004|orf6.4137|orf6.7005|orf6.7006|CA4459|CA4460|orf19.6856|orf19.6857|CaO19.748|NUP145	Predicted ORF in Assemblies 19, 20 and 21
orf19.2454	1.73207	0.0208418	PHO87	orf19.9990|orf6.1540|PHO98|IPF19824.2|IPF14853.2|Contig4-2200_0003|Contig4-2200_0004|Contig4-2200_0005|orf6.104|orf6.293|CA0548|CaO19.2454|CA0015|PHO87.5eoc|IPF19824.1	Protein similar to phosphate permeases; transcription is negatively regulated by Rim101p at pH 8; expression is regulated upon white-opaque switching; caspofungin repressed; biofilm-regulated; virulence-group-correlated expression
orf19.1261	1.72513	7.08838e-05	CGT1	orf19.8846|IPF26081.1|IPF18334.2|IPF8518.2|IPF8519.1|Contig4-2968_0008|orf6.5728|CA3459|CGT1.3f	mRNA 5' guanylyltransferase; small subunit of mRNA capping enzyme; binds an RNA Pol II C-terminal domain peptide; Cet1p and Cgt1p form a 2:1 complex; functional homolog of S. cerevisiae Ceg1p
orf19.1272	1.72468	0.000870342		orf19.8858|IPF26080.1|IPF10270.2|Contig4-2192_0009|orf6.2164|CA0948|CaO19.8858|CaO19.1272|IPF10270	Predicted ORF in Assemblies 19, 20 and 21
orf19.4578	1.72383	0.0206628	CYT2	orf19.12047|orf6.7877|IPF22621.1|IPF1023.2|Contig4-3104_0025|CA5141|CaO19.12047|CaO19.4578	Protein described as cytochrome c1 heme lyase; transcription is regulated by Nrg1p; transcriptionally regulated by iron; expression greater in high iron
orf19.939	1.70595	0.0311996	NAM7	orf19.8554|IPF26374.1|IPF9662.2|Contig4-2612_0009|orf6.8188|CA5396|CaO19.939|CaO19.8554	Putative role in nonsense-mediated mRNA decay; similar to S. cerevisiae Nam7p; gene induced by ciclopirox olamine treatment
orf19.4097	1.69085	0.0323555		orf19.11578|IPF23130.1|IPF2097.2|Contig4-3095_0039|Contig4-3095_0040|orf6.6839|CA4322|CaO19.4097|CaO19.11578|IPF2097	Predicted ORF in Assemblies 19, 20 and 21
orf19.2673	1.68439	0.00825629		orf19.10188|IPF24617.1|IPF6889.2|Contig4-1603_0002|orf6.5561|CA3326|CaO19.10188|CaO19.2673|IPF6889	Predicted ORF in Assemblies 19, 20 and 21
orf19.7451	1.67006	0.00777027	FUN31	IPF2894.1|Contig4-2597_0004|Contig4-3064_0016|orf6.8611|orf6.974|CA5742|PSK1|CaO19.7451|PSK2	Putative PAS kinase involved in cell wall damage response; similar to S. cerevisiae Psk1p, which is a putative serine/threonine protein kinase; transcriptionally activated by Mnl1p under weak acid stress
orf19.3089	1.66626	0.0348123		orf19.10601|IPF24196.1|IPF1732.1|Contig4-2877_0015|orf6.3732|CA2009|CaO19.10601|CaO19.3089|IPF1732	Predicted ORF in Assemblies 19, 20 and 21
orf19.4118	1.66054	0.026802	CNT	orf19.11600|NNT1|IPF12201|IPF12201.2|IPF2129.3|Contig4-2495_0005|orf6.6818|orf6.804|CA0189|NNT99|CaO19.4118	Cation-coupled nucleoside transporter (H(+)/nucleoside symporter); CNT family; transports adenosine, uridine, inosine, guanosine, tubercidin; variant alleles encode high- and low-affinity isoforms; S or G at residue 328 affects specificity
orf19.5430	1.65655	0.0497112	BUD21	orf19.12885|IPF21749.1|IPF1128.1|Contig4-2896_0013|orf6.8666|CA5783|CaO19.5430|CaO19.12885|IPF1128	Predicted ORF in Assemblies 19, 20 and 21; decreased expression in response to prostaglandins
orf19.3846	1.6546	0.0320588	LYS4	orf19.11327|IPF23444.1|IPF4077.2|Contig4-3060_0033|orf6.7541|CA4869|CaO19.11327|CaO19.3846	Protein described as homoaconitase; regulated by Gcn4p, Gcn2p; induced in response to amino acid starvation (3-aminotriazole treatment); upregulated in the presence of human whole blood or polymorphonuclear (PMN) cells
orf19.5037	1.64845	0.00485184		orf19.12504|IPF17054|IPF22188.1|IPF17054.2|orf6.3314|CA1693|CaO19.12504|HRQ2|CaO19.5037	Protein not essential for viability
orf19.2810	1.63223	0.0287157	AAP1	orf19.10328|IPF24528.1|IPF9490.2|Contig4-1993_0003|orf6.4583|CA2619|CaO19.2810|GAP32|CaO19.10328|IPF9490	Putative amino acid permease; fungal-specific (no human or murine homolog)
orf19.2746	1.62758	0.00713008		orf19.10260|IPF14444.3|IPF28996.1|Contig4-3001_0019|orf6.4702|CA2702|EMP70|CaO19.2746|IPF14444.2	Predicted ORF in Assemblies 19, 20 and 21
orf19.1956	1.62544	0.0231564		orf19.9511|IPF19331.2|IPF14757.2|Contig4-2143_0002|orf6.342|orf6.4083|CA2256|CaO19.1956|IPF14757	Predicted ORF in Assemblies 19, 20 and 21
orf19.3817	1.6214	0.00393964		orf19.11298|IPF23476.1|IPF6953.1|Contig4-2979_0004|orf6.7512|CA4848|CaO19.11298|RTS2|CaO19.3817	Predicted ORF in Assemblies 19, 20 and 21
orf19.3836	1.61573	0.00658574		orf19.11317|IPF23468.1|IPF4094.1|Contig4-3060_0009|orf6.7531|CA4861|CaO19.11317|CaO19.3836|IPF4094	Predicted ORF in Assemblies 19, 20 and 21
orf19.6208	1.61525	0.0265755	MEF2	orf19.13589|IPF20891.1|IPF8163.1|Contig4-2876_0010|orf6.5416|CA3212|CaO19.6208	Predicted ORF in Assemblies 19, 20 and 21; caspofungin induced
orf19.4342	1.61191	0.00777319		orf19.11817|IPF11357.2|IPF14623.2|Contig4-2344_0008|orf6.1848|orf6.2799|CA1344|CaO19.4342|IPF14623	Predicted ORF in Assemblies 19, 20 and 21
orf19.6514	1.59719	0.0043997	CUP9	orf19.13867|IPF20614.1|IPF3912.1|Contig4-3089_0018|orf6.7646|CA4960|CaJ7.0235|CaO19.13867|CaO19_6514|CaJ7_0235|CaO19.6514|IPF3912	Protein of unknown function, upregulated in clinical isolates from HIV+ patients with oral candidiasis; transcription reduced upon yeast-hyphal switch; ketoconazole-induced; Plc1p-regulated; shows colony morphology-related Ssn6p regulation
orf19.3365	1.59663	0.00353311	DAO2	orf19.10873|IPF10395.2|IPF18896.1|Contig4-2386_0006|orf6.1786|orf6.2576|CA0699|IFG2.5f|CA1197|IFG1	Putative D-amino acid oxidase
orf19.2623	1.5962	0.00188753	ECM22	orf19.10154|IPF24711.1|IPF12926.2|Contig4-2829_0014|orf6.1414|CA0471|ZCF12|CaO19.10154|CaO19.2623	Putative transcription factor with zinc cluster DNA-binding motif
orf19.1440	1.59263	0.0203831		orf19.9015|IPF25887.1|IPF10568.1|Contig4-2265_0003|orf6.1052|CA0279|CaO19.1440|IPF10568	Predicted ORF in Assemblies 19, 20 and 21; possibly spurious ORF (Annotation Working Group prediction)
orf19.1357	1.59007	0.0140969	FCY21	orf19.8937|FCY22|IPF17673.3|IPF8921.2|IPF17777.2|IPF17779.2|Contig4-1860_0007|Contig4-1860_0009|orf6.1000|orf6.332|CA6188|FCY2|FCY21.3f	High affinity, high capacity, hypoxanthine-adenine-guanine-cytosine/ H+ symporter; purine-cytosine permease of pyrimidine salvage; similar to S. cerevisiae Fcy2p; mutation confers resistance to 5-fluorocytosine (5-FC)
orf19.3810	1.58548	0.0094103		orf19.11291|IPF23466.1|IPF6938.2|Contig4-2979_0018|orf6.7505|CA4842|CaO19.3810|MTD1|CaO19.11291	Predicted ORF in Assemblies 19, 20 and 21
orf19.2727	1.58411	0.0210864	GRX3	orf19.10241|IPF24624.1|IPF10259.2|Contig4-2458_0002|orf6.2519|CA1161|CaO19.10241|CaO19.2727	Protein described as glutaredoxin; flucytosine induced; regulated by Gcn4p; repressed in response to amino acid starvation (3-aminotriazole treatment)
orf19.6656	1.58227	0.0360992	DUR3	IPF2277.1|Contig4-3038_0003|orf6.6765|CA4263|CaO19.6656|IPF2277	Putative protein of unknown function, transcription is upregulated in clinical isolates from HIV+ patients with oral candidiasis; alkaline downregulated; amphotericin B induced; shows colony morphology-related gene regulation by Ssn6p
orf19.4585	1.58132	0.00256186	TFG1	orf19.12054|IPF22571.1|IPF1015.1|Contig4-3104_0035|Contig4-3104_0037|orf6.7884|CA5148|CaO19.12054|CaO19.4585	Protein similar to S. cerevisiae Tfg1p, which is part of transcription factor TFIIF; transposon mutation affects filamentous growth
orf19.1507	1.57002	0.010849		orf19.9083|IPF25758.1|IPF17676.2|Contig4-1513_0004|Contig4-2650_0001|Contig4-2650_0018|orf6.1307|CA0411|CaO19.9083|AMN1|CaO19.1507|IPF17676	Predicted ORF in Assemblies 19, 20 and 21; Plc1p-regulated
orf19.7062	1.56543	0.0234269	RPA135	IPF479.1|Contig4-3106_0073|orf6.8491|CA5633|CaJ7.0071|CaO19.7062|CaJ7_0071|CaO19_7062	Predicted ORF in Assemblies 19, 20 and 21; decreased expression in response to prostaglandins
orf19.1422	1.5648	0.000572231	FZO1	orf19.8998|IPF25897.1|IPF11233.2|Contig4-2191_0006|orf6.6391|CA3963|CaO19.8998|CaO19.1422|IPF11233	Putative mitochondrial biogenesis protein; fungal-specific (no human or murine homolog)
orf19.976	1.55826	0.00178485	BRE1	orf19.8591|IPF26322.1|IPF1598.2|Contig4-3103_0012|orf6.8225|CA5424|CaO19.976|CaO19.8591|IPF1598	Putative transcription factor with C3HC4 zinc finger DNA-binding motif; similar to S. cerevisiae Bre1p; transposon mutation affects filamentous growth
orf19.6751	1.55611	0.0144572		orf19.14043|IPF20389.1|IPF3493.1|Contig4-3006_0009|orf6.8880|CA5946|TRM7|CaO19.6751|CaO19.14043|IPF3493	Predicted ORF in Assemblies 19, 20 and 21
orf19.1273	1.55166	0.0146134		orf19.8859|IPF10269.1|IPF29523.1|Contig4-2799_0007|orf6.2165|CA0949|CaO19.1273|GIM3|CaO19.8859|IPF10269	Predicted ORF in Assemblies 19, 20 and 21
orf19.828	1.55098	0.0367188		orf19.8448|IPF26441.1|IPF8752.2|Contig4-2913_0009|orf6.6719|CA4226|MRPL24|CaO19.8448|CaO19.828|IPF8752	Predicted ORF in Assemblies 19, 20 and 21; decreased expression in response to prostaglandins
orf19.702	1.54913	0.00537081		orf19.8321|IPF26613.1|IPF7990.1|Contig4-2984_0007|orf6.3326|CA1702|CaO19.702|ECM32|CaO19.8321|HEL1	Predicted ORF in Assemblies 19, 20 and 21
orf19.2143	1.54582	0.0489667		orf19.9690|IPF25218.1|IPF17094.2|Contig4-2481_0003|orf6.5377|CA3187|CaO19.9690|CaO19.2143|IPF17094	Predicted ORF in Assemblies 19, 20 and 21
orf19.721	1.54306	0.0179128		orf19.8340|IPF12829.2|IPF29720.1|Contig4-1601_0001|orf6.1093|CA0304|CaO19.8340|GRC3|CaO19.721|IPF12829	Predicted ORF in Assemblies 19, 20 and 21
orf19.4683	1.54244	0.0176024	MLP1	orf19.12152|IPF22637.1|IPF10559.2|Contig4-1629_0001|orf6.5453|orf6.68|CA3240|CaO19.4683|IPF10559	Protein similar to S. cerevisiae Mlp1p, which is a myosin-like protein
orf19.4769	1.54141	0.0035721	IPT1	orf19.12233|IPF11674.2|IPF17541.2|IPF17540.2|Contig4-2253_0002|orf6.2538|orf6.2539|orf6.927|CA0228|CA6290|orf19.4770|IPT1.5f	Inositol phosphoryl transferase, involved in sphingolipid biosynthesis; catalyzes the synthesis of the most abundant sphingolipid, mannose-(inositol-P)2-ceramide, M(IP)2C, from MIPC; required for wild-type membrane localization of Cdr1p
orf19.1789.1	1.53952	0.00920414	LYS1	orf19.9356|IPF25528.1|IPF25539.1|IPF29306.1|IPF10469.3|Contig4-2934_0006|orf6.1158|CA0343|orf19.1790|CA2460|LYS1.3eoc|IPF18465.1|LYS1.5eoc|IPF10469.2	Saccharopine dehydrogenase (biosynthetic); enzyme of alpha-aminoadipate lysine biosynthesis pathway; functionally complements S. cerevisiae lys1 mutation; fungal-specific (no human or murine homolog)
orf19.989	1.53941	0.0238058		orf19.8604|IPF9936.2|IPF6773.2|IPF20059.1|Contig4-2262_0002|orf6.5809|orf6.1598|CA6251|CA3526|orf19.990.1|MRPS5|MRPS5.5f|MRPS5.3f	Predicted ORF in Assemblies 19, 20 and 21
orf19.863	1.5382	0.00428496		orf19.8482|IPF26428.1|IPF7643.1|Contig4-2942_0011|orf6.3551|CA1863|CaO19.863|MRPL35|CaO19.8482	Predicted ORF in Assemblies 19, 20 and 21
orf19.6442	1.52689	0.00692957	PRP8	orf19.13800|IPF20757.1|IPF1378.2|Contig4-3074_0021|Contig4-3074_0023|Contig4-3074_0024|orf6.7812|CA5099|CaO19.13800|CaO19.6442	Protein similar to S. cerevisiae Prp8p; transcription is repressed in response to alpha pheromone in SpiderM medium
orf19.48	1.52548	0.00144604		orf19.7710|orf19.8369|orf6.534|IPF17790.3|IPF29973.1|IPF26514.1|IPF17515.2|Contig4-1613_0005|orf6.202|orf6.1208|CA0030|CA0103|orf19.749|IPF17790.5eoc|IPF17790|IPF17790.2	Predicted ORF in Assemblies 19, 20 and 21; likely to be essential for growth, based on an insertional mutagenesis strategy; virulence-group-correlated expression
orf19.1416	1.52502	0.0125204	COX11	orf19.8992|IPF25913.1|IPF11240.1|Contig4-2563_0004|Contig4-2563_0005|orf6.6385|CA3958|CaO19.1416|CaO19.8992	Protein repressed during the mating process; transcription is regulated by Nrg1p; transcription is upregulated in both intermediate and mature biofilms
orf19.3775	1.52307	0.0309599	SSK2	orf19.11257|IPF13431.2|IPF28626.1|IPF19716.1|Contig4-2648_0009|orf6.2292|orf6.2594|CA6281|CA1205|orf19.3776|SSK2.5f	Protein described as similar to MAP kinase kinase kinases; transcription is downregulated in response to treatment with ciclopirox olamine
orf19.4447	1.52139	0.00609682	YMC1	orf19.11927|IPF22816.1|IPF6563.1|Contig4-2378_0001|orf6.7260|CA4660|CaO19.4447|CaO19.11927	Predicted ORF in Assemblies 19, 20 and 21; flucytosine induced
orf19.2575	1.51829	0.00656152		orf19.10107|IPF24766.1|IPF2736.2|Contig4-2970_0001|orf6.4676|CA2684|CaO19.10107|CaO19.2575|IFU3	Predicted ORF in Assemblies 19, 20 and 21
orf19.3833	1.51722	0.00255185		orf19.11314|orf19.11316|IPF23441.1|IPF23449.1|IPF15927.2|IPF19804.1|IPF15927.5f|Contig4-3060_0003|Contig4-3060_0005|orf6.7528|orf6.7530|CA4859|CA4860|orf19.3835	Putative DNA-binding transcription factor; decreased transcription is observed upon fluphenazine treatment
orf19.773	1.50969	0.0156109		orf19.8395|orf6.1669|IPF17412.3|IPF3878.2|Contig4-2653_0008|orf6.1014|CA0628|CaO19.773|IPF3878	Putative ortholog of S. cerevisiae Rsa3p, which is a nucleolar protein involved in maturation of pre-60S ribosomal particles that interacts with Dbp6p
orf19.2738	1.50643	0.0315922	SUL2	orf19.10252|orf6.4694|SUL1|IPF14417.2|IPF28993.1|Contig4-2105_0001|CA2698	Protein described as a sulfate transporter; transcription is negatively regulated by Sfu1p; induced upon biofilm formation; amphotericin B induced
orf19.4676	1.50095	0.016919		orf19.12146|IPF22636.1|IPF15832.1|Contig4-2949_0002|orf6.5460|CA3247|CaO19.12146|CaO19.4676|IPF15832	Predicted ORF in Assemblies 19, 20 and 21
orf19.4041	0.666399	0.0401897	PEX4	orf19.11524|IPF8784.1|IPF7214.1|Contig4-3094_0004|orf6.4408|orf6.7454|CA4803|CaO19.4041	Predicted ORF in Assemblies 19, 20 and 21; transcription is upregulated in both intermediate and mature biofilms
orf19.807	0.664874	0.0200791	CHS5	orf19.8426|IPF19407.2|IPF5058.1|Contig4-2544_0010|orf6.173|orf6.2544|CA1176|CaO19.807|CA4208|CHS5.5eoc|IPF18240.1	Putative chitin biosynthesis protein; fungal-specific (no human or murine homolog); transcription decreases upon yeast-to-hyphal switch
orf19.3996	0.66433	0.0490752		orf19.11479|IPF23255.1|IPF19803.1|Contig4-2740_0019|orf6.7409|CA4764|CaO19.3996|GPI10	Putative mannosyltransferase; similar to S. cerevisiae Gpi10p; has HKEXRF motif
orf19.5438	0.663033	0.0192855		orf19.12893|IPF21785.1|IPF1143.1|orf6.8674|CA5789|CaO19.5438|CaO19.12893|IPF1143	Predicted ORF in Assemblies 19, 20 and 21
orf19.3573	0.662709	0.00688272		orf19.11057|IPF23761.1|IPF3213.2|Contig4-3023_0005|Contig4-3023_0006|orf6.5756|CA3485|PEX6|CaO19.3573|CaO19.11057|IPF3213	Predicted ORF in Assemblies 19, 20 and 21
orf19.1189	0.66238	0.0230123		orf19.8780|IPF19121.2|IPF9057.2|Contig4-2980_0031|orf6.4626|orf6.861|CA2649|CaO19.1189|IPF9057	Predicted ORF in Assemblies 19, 20 and 21; transcription regulated upon yeast-hyphal switch; transcriptionally activated by Mnl1p under weak acid stress
orf19.3534	0.660114	0.00412443	RHO3	orf19.11018|IPF6422.1|IPF4472.1|Contig4-2990_0019|orf6.4280|orf6.606|CA2393	Putative Rho family GTPase; possible substrate of protein farnesyltransferase and geranylgeranyltransferase type I; greater transcription in hyphal form than yeast form
orf19.7445	0.659741	0.00767654		IPF2878.1|Contig4-2403_0005|orf6.8605|CA5735|VID24|CaO19.7445|IPF2878	Predicted ORF in Assemblies 19, 20 and 21
orf19.7166	0.65916	0.00502563		IPF2186.1|Contig4-3097_0006|orf6.8066|CA5301|CaJ7.0473|CaO19_7166|CaJ7_0473|CaO19.7166|IPF2186	Predicted ORF in Assemblies 19, 20 and 21; increased transcription is observed in an azole-resistant strain that overexpresses MDR1; transcriptionally activated by Mnl1p under weak acid stress
orf19.7251	0.657351	0.0376834	WSC4	IPF5256.1|Contig4-2986_0002|orf6.8151|CA5369|CaO19.7251	Transcription is specific to white cell type
orf19.3315	0.656878	0.00491376	CTA9	orf19.10825|IPF23940.1|IPF5750.2|Contig4-2978_0011|orf6.7210|CA4623|CaO19.10825|CaO19.3315	Protein induced during the mating process; activates transcription in 1-hybrid assay in S. cerevisiae
orf19.2125	0.656365	9.39801e-05		IPF16257.1|IPF29197.1|Contig4-1838_0003|orf6.864|CaO19.2125	Predicted ORF in Assemblies 19, 20 and 21
orf19.4928	0.656141	0.0161296		orf19.12394|IPF6094.2|IPF28177.1|Contig4-2999_0005|orf6.5908|CA3598|SEC2|CaO19.4928	Predicted ORF in Assemblies 19, 20 and 21
orf19.3859	0.652879	0.0413799		orf19.11340|IPF6600|IPF23395.1|IPF6600.2|Contig4-3046_0006|orf6.5249|CA3097|CaO19.11340|CaO19.3859	Predicted ORF in Assemblies 19, 20 and 21; transcription is upregulated in response to treatment with ciclopirox olamine; transcription is induced in response to alpha pheromone in SpiderM medium
orf19.4943	0.652658	0.0138397	PSA2	orf19.12409|PSA1|IPF22264.1|IPF5668.1|Contig4-2994_0010|orf6.6047|CA3706|CaO19.12409|CaO19.4943	Predicted ORF in Assemblies 19, 20 and 21; macrophage-downregulated gene; protein detected by mass spec in stationary phase cultures
orf19.72	0.650004	0.0154039		Contig4-2780_0006|CTR2|CaO19.72	Predicted ORF from Assembly 19; merged with orf19.4720 in Assembly 20
orf19.2791	0.648244	0.0345467		orf19.10309|IPF7255.2|IPF11796.1|Contig4-2483_0003|Contig4-2693_0010|orf6.3608|orf6.3610|orf6.3720|CA2000|CaO19.2791|IPF11796	Predicted ORF in Assemblies 19, 20 and 21
orf19.5265	0.648208	0.0343684	KIP4	orf19.12730|KINH|IPF21924.1|IPF2050.1|Contig4-3082_0007|Contig4-3082_0008|orf6.7677|CA4985|CaO19.5265|SMY1|CaO19.12730|IPF2050	Transposon mutation affects filamentous growth; filament induced; shows Mob2p-dependent hyphal regulation; regulated by Nrg1p, Tup1p
orf19.6510	0.648187	0.0499493	GRX1	orf19.13863|orf6.7650|IPF20674.1|IPF3919.2|Contig4-3089_0003|CA4963|CaJ7.0239|CaO19.6510|CaJ7_0239|CaO19_6510|CaO19.13863|IPF3919	Protein described as glutaredoxin; transcriptionally regulated by iron; expression greater in low iron
orf19.3184	0.647559	0.0111778		orf19.10694|IPF24126.1|IPF20108.1|Contig4-2288_0005|orf6.4481|CA2537|SFT22|CaO19.3184|CaO19.10694|SFT21|IPF20108	Predicted ORF in Assemblies 19, 20 and 21
orf19.1116	0.646984	0.0219937		orf19.8713|IPF26198.1|IPF6325.2|Contig4-2766_0014|orf6.3468|CA1809|CaO19.1116|CaO19.8713|IPF6325	Predicted ORF in Assemblies 19, 20 and 21; possibly spurious ORF (Annotation Working Group prediction)
orf19.5527	0.646682	0.0111601		orf19.12973|IPF21588.1|IPF4331.1|Contig4-2690_0004|orf6.4469|CA2527|YMR285|NGL2|CaO19.5527|IPF4331	Predicted ORF in Assemblies 19, 20 and 21; similar to S. cerevisiae Ymr285p and Yml118p; gene transcribed divergently from SEC20
orf19.2876	0.646501	0.0200979	CBF1	orf19.10394|IPF24445.1|IPF3238.1|Contig4-2826_0005|orf6.4385|CA2473|CaO19.10394|CaO19.2876	Transcription factor that binds to a conserved sequence at ribosomal protein genes and the rDNA locus, with Tbf1p; also regulates sulfur starvation-response and other genes; binds centromeres and has a role in centromere maintenance
orf19.1390	0.646469	0.00600751	PMI1	orf19.8968|PMI40|IPF19894.1|IPF11071.3|Contig4-2636_0003|Contig4-2636_0004|MPI|orf6.2074|orf6.2242|CA0988|CaO19.1390	Phosphomannose isomerase; cell wall biosynthesis enzyme; drug target; functional homolog of S. cerevisiae and E. coli phosphomannose isomerase; Gcn4p-regulated; repressed by 3-AT; induced on adherence to polystyrene, phagocytosis
orf19.5619	0.644834	0.00193731		orf19.13064|IPF12435.2|IPF19389.2|Contig4-2504_0006|orf6.213|orf6.4778|CA2755|LPF39|CaO19.5619|IFA12	Predicted ORF in Assemblies 19, 20 and 21; transcription is induced in response to alpha pheromone in SpiderM medium
orf19.3273	0.64454	0.0215956		orf19.10783|orf19.10784|IPF24047.1|IPF285.1|Contig4-2791_0003|orf6.8273|orf6.8274|CA5464|CA5465|orf19.3274|IPF285.5f	Predicted ORF in Assemblies 19, 20 and 21
orf19.1442	0.644049	0.0134855	PLB4.5	orf19.9017|orf19.9018|IPF15731.2|IPF15733.2|IPF14660.3|IPF29416.1|PLB4.3|Contig4-2174_0003|Contig4-2174_0004|orf6.1059|orf6.795|orf6.796|PLB4|PLB4.5f|PLB4.3f|CA0185|CA0186|orf19.1443	Putative phospholipase B; Hog1p-induced; regulated by Ssn6p; putative GPI-anchor; repressed during cell wall regeneration; clade-associated gene expression
orf19.4077	0.643366	0.0350019	MIT1	orf19.11558|SUR1|IPF2067.2|IPF28522.1|Contig4-2072_0001|Contig4-2072_0002|orf6.3203|CA1619|CaO19.11558|CaO19.4077|IPF2067	Protein involved in sphingolipid biosynthesis; required for mannosylation of inositol phosphoceramide (IPC) to form mannosylated sphingolipids MIPC and M(IP)2C; fluconazole, caspofungin induced; macrophage-downregulated gene
orf19.6630	0.640406	1.98625e-05		IPF2532.2|IPF27678.1|Contig4-2856_0002|Contig4-2856_0003|orf6.1187|orf6.6527|CA0356|CaO19.6630|IPF2532	ORF Predicted by Annotation Working Group
orf19.6155	0.638719	0.0272587		CDC9|IPF9796.2|Contig4-2784_0016|orf6.5316|CA3145|CaO19.6155	Predicted ORF in Assemblies 19, 20 and 21
orf19.3493	0.638581	0.0083914		IPF19883.1	Predicted ORF from Assembly 19; removed from Assembly 20
orf19.1593	0.636347	0.0167331		IPF13327.2|Contig4-2905_0001|orf6.1071|RIM11|CaO19.1593	Protein not essential for viability; similar to S. cerevisiae Rim11p, which is a protein kinase involved in meiosis and sporulation; merged with orf19.791 in Assembly 20
orf19.5073	0.635673	0.0478603	DPM1	orf19.12539|IPF22152.1|IPF10089.2|Contig4-2713_0004|orf6.6303|CA3899|DPMS|CaO19.12539|CaO19.5073	Protein with similarity to S. cerevisiae Dpm1p, which is dolichol phosphate mannose synthase; filament induced; Tup1p-regulated
orf19.1723	0.635261	0.000750046		orf19.9291|IPF25651.1|IPF8407.1|Contig4-2981_0015|orf6.4837|CA2795|CaO19.9291|CaO19.1723|IPF8407	Predicted ORF in Assemblies 19, 20 and 21
orf19.3438	0.633985	0.0243662		orf19.10942|IPF23837.1|IPF7178.2|Contig4-2644_0011|orf6.6467|CA4025|CaO19.10942|SCJ1|CaO19.3438	Predicted ORF in Assemblies 19, 20 and 21
orf19.2952	0.63282	0.0055274	EXG2	orf19.10469|orf6.6664|IPF24292.1|IPF4419.1|Contig4-2696_0012|Contig4-2696_0013|Contig4-2696_0015|CA4180|CaO19.2952|CaO19.10469	Protein similar to S. cerevisiae Exg2p, which is an exo-1,3-beta-glucosidase; predicted Kex2p substrate; induced during cell wall regeneration
orf19.6348	0.632542	0.0303128		orf19.13704|IPF14485|IPF19117.2|IPF14485.2|Contig4-2232_0003|Contig4-2232_0005|orf6.5777|orf6.876|CA3502|CaO19.6348	Protein not essential for viability
orf19.242.2	0.632068	0.0195536		IPF10503.2|CA1267|YSY6	ORF Predicted by Annotation Working Group
orf19.2355	0.631945	0.0286725	ALS10	orf19.9891|IPF24952.1|IPF12997.2|orf6.2760|ALS2|CA0448|ALS3|CaO19.2355|orf6.1377	ALS family protein; ALS family includes cell-surface glycoproteins, some with adhesin function; putative GPI-anchor; filament induced; regulated by Nrg1p, Rfg1p, Tup1p; merged with orf19.1816 in Assembly 20
orf19.4726	0.631919	0.0147901		orf19.12189|IPF22479.1|IPF16484.1|orf6.3188|CA1606|FRQ1|CaO19.4726|CaO19.12189|NCS1	Predicted ORF in Assemblies 19, 20 and 21
orf19.6078	0.631607	0.000523502	POL93	IPF17652.3|Contig4-2396_0002|Contig4-2396_0003|Contig4-2960_0011|orf6.241|orf6.1756|CA0037|CaO19.6078|IPF17652.2	Predicted ORF in retrotransposon Tca8 with similarity to the Pol region of retrotransposons encoding reverse transcriptase, protease and integrase; downregulated in response to ciclopirox olamine; induced upon biofilm formation
orf19.4567	0.630739	0.0361123		orf19.12036|IPF22616.1|IPF1043.2|Contig4-3104_0008|orf6.3099|CA1543|CaO19.4567|HQD2|CaO19.12036|IPF1043	Catechol 1,2-dioxygenase (1,2-CTD), involved in degradation of aromatic compounds
orf19.1881	0.628666	0.0469323		orf19.9437|IPF25428.1|IPF9156.2|orf6.7039|CA4483|CaO19.9437|CaO19.1881|IPF9156	Predicted ORF in Assemblies 19, 20 and 21
orf19.2864	0.628447	0.0374928		orf19.10382|IPF24494.1|IPF7309.1|Contig4-2091_0001|orf6.3266|CA1663|CaO19.2864|CaO19.10382|IPF7309	Predicted ORF from Assembly 19; merged with orf19.2426 in Assembly 20
orf19.1995	0.627227	0.026871		orf19.9547|IPF4742.2|IPF17173.3|Contig4-2500_0005|Contig4-2500_0006|orf6.6364|orf6.767|CA3946|MNN22|CaO19.1995|MNN2	Predicted ORF in Assemblies 19, 20 and 21
orf19.3150	0.626979	0.000493215	GRE2	orf19.10660|orf6.1740|Contig4-2831_0003|GRP4|IPF15555.2|IPF28876.1|CA0671|CaO19.3150|GRE23|CaO19.10660	Protein described as a reductase; transcription is regulated by Nrg1p and Tup1p; benomyl-induced; hyphal-induced; macrophage/pseudohyphal-repressed; expression greater in low iron; reported to be involved in osmotic stress response
orf19.1785	0.62678	0.005167		orf19.9351|IPF13018.3|IPF13017.2|Contig4-2624_0006|orf6.214|orf6.2532|CA1168|CaO19.9351|CaO19.1785|IPF13017	Predicted ORF in Assemblies 19, 20 and 21
orf19.2768	0.625678	0.0246076	AMS1	orf19.10284|IPF24664.1|IPF7076.2|Contig4-2513_0006|orf6.6584|CA4123|CaO19.2768|CaO19.10284	Putative alpha-mannosidase; transcription is regulated by Nrg1p; induced during cell wall regeneration
orf19.295	0.624368	0.0094458		orf19.7927|IPF27021.1|IPF3831.1|Contig4-3050_0013|orf6.4298|CaO19.295|CaO19.7927	Predicted ORF in Assemblies 19, 20 and 21
orf19.6684	0.624121	0.00214508	PNC1	orf19.13976|orf19.14000|IPF20488.1|IPF20011.1|IPF20491.1|IPF6660.2|IPF6660|Contig4-3088_0002|orf6.6793|orf6.6817|CA4286|CA4308|CaJ7.0402|orf19.6708|IPF20011.5f	Putative nicotinamidase, involved in NAD salvage pathway; decreased transcription is observed in an azole-resistant strain that overexpresses MDR1
orf19.4216	0.62364	0.000742319		orf19.11692|HSP12|Contig4-2148_0004|Contig4-2734_0007|Contig4-2734_0006|IPF23008.1|IPF17399.2|orf6.1771|orf6.2761|CaO19.11692|CaO19.4216|CaO19.10669	Predicted ORF in Assemblies 19, 20 and 21; decreased expression in hyphae compared to yeast-form cells; transcription is increased in populations of cells exposed to fluconazole over multiple generations
orf19.281	0.623197	0.0204184		orf19.7913|IPF27023.1|IPF3798.2|orf6.4810|CA2780|CaO19.7913|CaO19.281|IPF3831	Predicted ORF in Assemblies 19, 20 and 21
orf19.7425	0.622866	0.0022302		IPF2442.1|Contig4-3080_0022|orf6.8585|CA5720|CaO19.7425|UNG1	Predicted ORF in Assemblies 19, 20 and 21
orf19.1149	0.62206	0.0226188	MRF1	orf19.8742|IPF11717.2|IPF14722.3|Contig4-2773_0007|orf6.100|orf6.2782|CA1333|ETR2|CaO19.1149	Protein similar to mitochondrial respiratory proteins; increased transcription observed upon benomyl treatment; induced by farnesol, nitric oxide, core stress response; oxidative stress-induced via Cap1p
orf19.3522	0.619731	0.00823445		orf19.11005|IPF17272|IPF19533.2|IPF17272.2|Contig4-1527_0001|Contig4-2828_0015|orf6.2035|CA0860|CaO19.11005|CaO19.3522|IPF17272.3f	Predicted ORF in Assemblies 19, 20 and 21; transcription is downregulated in response to treatment with ciclopirox olamine
orf19.940	0.618364	0.0172081	BUD2	orf19.8555|orf6.8189|IPF26369.1|IPF9663.2|Contig4-2510_0003|CA5397|CaO19.940|CaO19.8555|IPF9663	GTPase activating protein (GAP) for Rsr1p; negative regulator of filament branching, acts in hyphal growth guidance; required for wild-type budding pattern; expression greater in low iron; regulated by tyrosol and cell density
orf19.3259	0.617827	0.0127949		orf19.10769|IPF24057.1|IPF252.1|Contig4-2987_0017|orf6.8259|CA5452|SEC11|CaO19.10769|CaO19.3259	Predicted ORF in Assemblies 19, 20 and 21
orf19.347	0.614989	0.0157327	RSN1	orf19.7980|IPF27030.1|IPF1506.1|Contig4-3090_0035|orf6.7231|CA4640|CaO19.7980|CaO19.347|IPF1506	Protein induced during the mating process
orf19.6579	0.613966	0.00531591		orf19.13932|IPF20602.1|IPF1632.1|Contig4-3066_0005|orf6.7567|CA4887|CaJ7.0165|CaJ7_0165|CaO19_6579|CaO19.6579|CaO19.13932|IPF1632	Predicted ORF in Assemblies 19, 20 and 21
orf19.5103	0.611766	0.0245739		orf19.12569|IPF17128.2|IPF12719.2|Contig4-1667_0001|orf6.4038|orf6.6347|CA3931|PMU5|CaO19.5103|IPF12719	Predicted ORF in Assemblies 19, 20 and 21; clade-associated gene expression
orf19.6832	0.6106	0.00317554		orf19.14124|orf19.14125|IPF20332.1|IPF12080.1|IPF20329.1|IPF12082.2|Contig4-2530_0001|Contig4-2530_0005|Contig4-2530_0007|Contig4-2530_0013|orf6.8799|orf6.8798|CA5877|CA5876|orf19.6833|CaO19.6832|CaO19.14124|IPF12082.3f	Predicted ORF in Assemblies 19, 20 and 21
orf19.3160	0.60975	0.0448926	HSP12	orf19.10669|orf19.13883|orf6.1668|IPF3160.2|CA0627|CaO19.3160	Heat-shock protein; induced upon osmotic/oxidative/cadmium stress, fluphenazine treatment, low iron, CDR1 and CDR2 overexpression, or ssn6 or ssk1 homozygous null mutation; repressed by Hog1p, flucytosine, elevated CO2
orf19.2175	0.609281	0.0242015		orf19.9721|IPF25135.1|IPF19998.1|Contig4-3057_0019|Contig4-3057_0021|Contig4-3057_0022|orf6.6088|CA3743|CPD1|CaO19.9721|CaO19.2175|IPF19998	Predicted ORF in Assemblies 19, 20 and 21; induced by nitric oxide
orf19.1591	0.606086	0.0364283	ERG10	IPF13331.2|POT14|orf6.1069|CA0290|CaO19.1591	Protein similar to acetyl-CoA acetyltransferase; role in ergosterol biosynthesis; soluble in hyphae; changes in protein abundance associated with azole resistance; fluconazole or ketoconazole induced; macrophage-downregulated protein
orf19.7405	0.603037	0.0291378		IPF2645.2|Contig4-3029_0003|orf6.8565|CA5705|CaO19.7405|IPF2645	Predicted ORF in Assemblies 19, 20 and 21; transcriptionally activated by Mnl1p under weak acid stress
orf19.3549	0.601066	0.0367657	CDC21	orf19.11033|TMP1|IPF19442.2|IPF13364.2|Contig4-1753_0001|orf6.102|orf6.4652|CA2665|CaO19.3549|CaO19.11033	Predicted ORF in Assemblies 19, 20 and 21; flucytosine induced; transcription is downregulated in both intermediate and mature biofilms
orf19.4993	0.600955	0.0323284	SEC18	orf19.12460|orf19.12461|IPF22276.1|IPF22225.1|IPF22267.1|IPF1784.2|IPF1785.2|IPF1786.2|Contig4-3025_0011|Contig4-3025_0012|Contig4-3025_0013|orf6.8016|orf6.8015|CA5270|CA5268|orf19.4994|SEC18.5f	Functional homolog of S. cerevisiae Sec18p, which acts in protein transport; conserved ATP binding site; not glycosylated
orf19.6028	0.600691	0.0230176	HGC1	orf19.13449|IPF7912.2|IPF15332.2|CLN21|Contig4-2280_0001|orf6.1969|orf6.3156|CA1582|CLN3|CaO19.6028	Hypha-specific G1 cyclin-related protein involved in regulation of hyphal morphogenesis; Cdc28p-Hgc1p maintains Cdc11p S394 phosphorylation during hyphal growth; required for virulence in mouse model; regulated by Nrg1p, Tup1p, farnesol
orf19.2047	0.593776	0.00511628		orf19.9595|IPF25302.1|IPF7456.1|Contig4-3065_0024|orf6.5986|CA3656|CaO19.9595|CaO19.2047|IPF7456	Predicted ORF in Assemblies 19, 20 and 21; mutation confers hypersensitivity to toxic ergosterol analog, and to amphotericin B
orf19.2374	0.591424	0.000513998		orf19.9910|IPF24956.1|IPF6238.2|orf6.4772|CA2752|GAG2|CaO19.9910|CaO19.2374|IPF6238	Predicted ORF from Assembly 19; removed from Assembly 20
orf19.4530.1	0.589587	0.044701		IPF22717.1|IPF7527.2|Contig4-2751_0008|CA4189|IPF7527	ORF Predicted by Annotation Working Group; regulated by Nrg1p, Tup1p
orf19.2614	0.589411	0.036151	RSR1	orf19.10145|IPF24771.1|IPF8507.2|Contig4-2859_0002|orf6.4271|CA2385|RSR1.3	RAS-related protein; GTP/GDP cycling required for wild-type polar bud site selection, hyphal growth guidance; role in systemic virulence in mouse; geranylgeranylation predicted; suppresses S. cerevisiae cdc24-4 mutant heat sensitivity
orf19.6833	0.586682	0.0154619		orf19.14125|IPF20329.1|IPF12082.2|Contig4-2530_0001|Contig4-2530_0005|Contig4-2530_0013|orf6.8798|CA5876|CaO19.14125|CaO19.6833|IPF12082.5f	Predicted ORF from Assembly 19; merged with orf19.6832 in Assembly 20
orf19.5069	0.586319	0.00450363		orf19.12535|IPF12316.2|IPF19120.1|Contig4-2337_0002|orf6.2427|orf6.865|CA1098|CaO19.5069|IPF12316	Predicted ORF in Assemblies 19, 20 and 21
orf19.2426	0.585459	0.0222147		orf19.9964|orf19.10382|IPF24925.1|IPF17722.2|IPF24494.1|IPF7309.1|Contig4-2091_0001|orf6.5167|orf6.3266|CA1663|orf19.2864|CaO19.9964|CaO19.2426	Predicted ORF in Assemblies 19, 20 and 21
orf19.5177	0.584511	0.0333064		orf19.12644|IPF22043.1|IPF5401.2|Contig4-2348_0001|Contig4-2348_0002|orf6.6959|CA4419|CaJ7.0324|CaJ7_0324|CaO19_5177|LPF36|CaO19.5177|CaO19.12644|IFA6	Predicted ORF in Assemblies 19, 20 and 21; possibly spurious ORF (Annotation Working Group prediction)
orf19.94	0.582973	0.00917308		orf19.7740|IPF17606.2|IPF19749.1|orf6.3706|CA1988|CaO19.94|CaO19.7740|IPF19749	Predicted ORF in Assemblies 19, 20 and 21
orf19.4930	0.581962	0.00063952	SPC3	orf19.12396|orf6.5910|IPF22286.1|IPF15621.2|Contig4-2611_0002|CA3600|CaO19.12396|CaO19.4930	Essential protein; similar to S. cerevisiae Spc3p, a component of the signal peptidase complex required for signal peptidase activity; predicted integral ER membrane protein; complements spc3 and suppresses sec61 S. cerevisiae mutants
orf19.223	0.576896	0.0437746		orf19.7854|IPF19261.2|IPF13825.2|Contig4-2835_0022|orf6.276|orf6.278|orf6.476|orf6.5150|CA3029|CaO19.223|IPF13825	Predicted ORF in Assemblies 19, 20 and 21; increased expression in response to prostaglandins
orf19.7456	0.574088	0.0019925		IPF2903.1|Contig4-3064_0008|orf6.8616|CA5747|CaO19.7456|IPF2903	Predicted ORF in Assemblies 19, 20 and 21
orf19.2172	0.570589	0.046067	ARA1	orf19.9718|IPF25141.1|IPF10148.2|Contig4-3057_0027|orf6.6091|CA3746|CaO19.9718|CaO19.2172	D-Arabinose dehydrogenase; in dehydro-D-arabinono-1,4-lactone biosynthesis; NADP+ cofactor; active toward D-arabinose, L-fucose, L-xylose, L-galactose; inhibited by metal ions, thiol group-specific reagents; induced on polystyrene adherence
orf19.2863	0.568609	0.0298748		orf19.10381|IPF19166.2|IPF7313.2|Contig4-2091_0004|orf6.3267|orf6.734|CaO19.2863	Predicted ORF in Assemblies 19, 20 and 21; possibly spurious ORF (Annotation Working Group prediction)
orf19.4738	0.568095	0.0421779		orf19.12200|IPF22411.1|IPF10645.2|Contig4-2892_0001|orf6.3650|CA1944|CaO19.4738|CaO19.12200|IPF10645	Predicted ORF in Assemblies 19, 20 and 21
orf19.5379	0.564287	0.041081	ERG4	orf19.12834|IPF21722.1|IPF8225.1|Contig4-2974_0009|orf6.4141|CA2297|CaO19.5379|CaO19.12834	Protein described as similar to sterol C-24 reductase; shows Mob2p-dependent hyphal regulation; fluconazole-induced; caspofungin repressed
orf19.768	0.564016	0.0430985	SYG1	orf19.8389|IPF16589.3|IPF3887.2|Contig4-2869_0003|orf6.3668|orf6.698|CA1957|CaO19.768|IPF3887	Protein not essential for viability; similar to S. cerevisiae Syg1p, which is a plasma membrane protein that may be involved in signal transduction
orf19.4539	0.559593	0.0260827		orf19.12014|IPF22724.1|IPF8055.2|Contig4-2727_0005|orf6.6685|CA4198|CaO19.4539|CaO19.12014|IPF8055	Predicted ORF in Assemblies 19, 20 and 21
orf19.1982	0.556712	0.0109639		orf19.9538|IPF25393.1|IPF8700.2|Contig4-2633_0005|orf6.2478|orf6.5692	Predicted ORF from Assembly 19; merged with orf19.588 in Assembly 20
orf19.5691	0.549119	0.0320753	CDC11	IPF5456.1|Contig4-2927_0014|orf6.4569|CA2610|CaO19.5691	Septin; required for wild-type cell and hyphal morphology, agar-invasive growth, full virulence and kidney tissue invasion in mouse, but not for kidney colonization, immunogenicity; phosphorylation is hyphal- and cell-cycle-regulated
orf19.7304	0.54791	0.034793		IPF19812.1|Contig4-2245_0009|orf6.8385|CA5542|IPF19812|CaO19.7304	Predicted ORF in Assemblies 19, 20 and 21
orf19.5417	0.547116	0.0146139	DOT5	orf19.12872|IPF21747.1|IPF1111.1|Contig4-2864_0008|orf6.8653|CA5773|CaO19.5417|CaO19.12872	Alkaline downregulated
orf19.6889	0.542645	0.0449491	MKK2	orf19.14178|IPF9424.3|IPF14309.2|Contig4-2509_0011|orf6.121|orf6.7153|CA4577|CaO19.6889	Protein not essential for viability; similar to S. cerevisiae Mkk2p, which is a MAP kinase kinase involved in signal transduction; macrophage-downregulated gene
orf19.4033	0.54128	0.0240856	PRP22	orf19.11516|IPF23374.1|IPF8801.2|Contig4-3094_0013|orf6.7446|CA4797|CaO19.4033|CaO19.11516	Protein described as an RNA-dependent ATPase; induced upon adherence to polystyrene; transcriptionally activated by Mnl1p under weak acid stress
orf19.2261	0.539217	0.00133457		orf19.9801|IPF25070.1|IPF11104.2|Contig4-2843_0018|orf6.5885|CA3579|CaO19.9801|SAP49|CaO19.2261|HSH49	Predicted ORF in Assemblies 19, 20 and 21
orf19.1598	0.536186	0.0022361	ERG24	orf19.9166|IPF25723.1|IPF3764.2|Contig4-3095_0045|orf6.1086|orf6.1911|CA0300|CaO19.9166|CaO19.1598	C-14 sterol reductase, has a role in ergosterol biosynthesis; mutation confers increased sensitivity to dyclonine
orf19.4997	0.530752	0.0455257	KIS2	orf19.12464|IPF22214.1|IPF1792.1|Contig4-3025_0006|Contig4-3025_0007|orf6.8012|CA5265|CaO19.4997|CaO19.12464|IPF1792	Scaffold protein of Snf1p complex; similar to S. cerevisiae Gal83p and Sip2p; interacts with Snf4p; interaction with Snf1p complex is regulated by carbon source, decreased on ethanol; N-terminal myristoylation; Hog1p-downregulated
orf19.4664	0.517242	0.00999907		orf19.12134|IPF22668.1|IPF7403.2|Contig4-2819_0011|orf6.4072|orf6.4715|CA2710|CaO19.4664|IPF7403	Predicted ORF in Assemblies 19, 20 and 21
orf19.7479	0.516959	0.0394388	NTH1	orf6.8731|NTC1|IPF2490.1|Contig4-2988_0007|CA5824|CaO19.7479	Neutral trehalase; hyphal induction in homozygous null mutant is delayed but not reduced overall; not required for virulence in mouse systemic infection; homodimeric enzyme; possible regulatory cAMP-dependent phosphorylation at S10 and S213
orf19.1653	0.488279	0.0476142		orf19.9222|IPF25655.1|IPF15087.2|Contig4-2710_0009|orf6.3138|CA1573|CaO19.1653|CaO19.9222|IPF15087	Predicted ORF in Assemblies 19, 20 and 21; possibly spurious ORF (Annotation Working Group prediction)
orf19.2132	0.486907	0.0164087		orf19.9679|IPF25191.1|IPF12241.1|Contig4-2687_0003|orf6.5366|CA3181|CaO19.9679|CaO19.2132|IPF12241	Predicted ORF in Assemblies 19, 20 and 21; possibly spurious ORF (Annotation Working Group prediction)
orf19.4998	0.486763	0.034941		orf19.12465|IPF22198.1|IPF1798.2|orf6.8011|CA5264|CaO19.4998|CHA4|CaO19.12465|IPF1798	Predicted ORF in Assemblies 19, 20 and 21; caspofungin repressed
orf19.2959.1	0.484765	0.0221519		IPF24404.1|IPF4430.1|CA4174|IPF4430|IPF4119.5	ORF Predicted by Annotation Working Group
orf19.4747	0.475992	0.0350859	HEM14	orf19.12209|orf6.4017|orf6.3659|IPF19663.1|IPF19662.1|CA1951|CaO19.4747	Putative protoporphyrinogen oxidase involved in heme biosynthesis; predicted Kex2p substrate; transcription is regulated by iron; mRNA levels are decreased in a yfh1 null mutant
orf19.767	0.475139	0.00900518	ERG3	orf19.8387|IPF16592.2|IPF3890.1|Contig4-1987_0003|orf6.3667|orf6.696|CA1956|CaO19.8387|CaO19.767	C-5 sterol desaturase; introduces C-5(6) double bond into episterol in ergosterol biosynthesis; clinically-isolated homozygous null mutants show azole resistance, defects in hyphal growth and virulence; Efg1p-repressed; fluconazole-induced
orf19.633	0.474203	0.0285122		IPF26671.1|IPF11379.2|IPF19271.1|Contig4-2129_0003|orf6.444|CA0081|IPF11379	Protein described as a putative methyltransferase; decreased expression in hyphae compared to yeast-form cells; expression regulated during planktonic growth
orf19.1822	0.466851	0.0252502	UME6	orf19.9381|IPF15273.2|IPF14703.2|Contig4-1197_0003|orf6.1326|orf6.3429|CA0423|CaO19.1822|IPF15273	Transcription factor; required for wild-type hyphal extension, virulence; zinc cluster DNA-binding motif; similar to S. cerevisiae Ume6p, which is a meiotic regulator; alkaline upregulated; filament induced; regulated by Nrg1p, Tup1p, RFG1p
orf19.2210	0.460364	0.000204835		orf19.9755|IPF19934.2|IPF29168.1|Contig4-2359_0002|Contig4-3058_0002|orf6.3574|orf6.4255|CA1882|CaO19.2210|IPF19934|IPF19934.1	Predicted ORF in Assemblies 19, 20 and 21
orf19.6905	0.455402	0.0248475		IPF2223.1|Contig4-3039_0015|orf6.7169|CA4587|CaJ7.0139|CaO19.6905|CaO19_6905|CaJ7_0139|IPF2223	Predicted ORF in Assemblies 19, 20 and 21
orf19.822	0.435304	0.00777649		orf19.8442|IPF26460.1|IPF8762.2|Contig4-2913_0002|orf6.6713|CA4220|CaO19.822|CaO19.8442|IPF8762	Protein detected in some, not all, biofilm extracts; fluconazole-downregulated; greater mRNA abundance observed in cyr1 or ras1 homozygous null mutant than in wild type; protein detected by mass spec in stationary phase cultures
orf19.2531	0.425159	0.0286515	CSP37	orf19.10066|orf6.2388|IPF24765.1|IPF4991.2|Contig4-2933_0007|CA1075|CaO19.10066|CaO19.2531|IPF4991	Plasma membrane, hyphal cell wall protein; role in progression of murine systemic infection; predicted P-loop, divalent cation binding, N-glycosylation sites; expressed in yeast and hyphae; hyphal downregulated; lacks S. cerevisiae homolog
orf19.4013	0.412548	0.0477642		orf19.11496|IPF23252.1|IPF3352.2|Contig4-3094_0040|orf6.7426|CA4780|CaO19.11496|CaO19.4013|IPF3352	Predicted ORF in Assemblies 19, 20 and 21
orf19.1862	0.382331	0.00107046		orf19.9418|IPF4065|orf6.1262|IPF18208.2|IPF4065.1|Contig4-2502_0004|CA0386|CaO19.1862	Possible stress protein; increased transcription is associated with CDR1 and CDR2 overexpression or fluphenazine treatment; transcription regulated by Sfu1p, Nrg1p, Tup1p
orf19.2248	0.370492	0.0345026	ARE2	orf19.9788|IPF10109.2|IPF10110.1|Contig4-2290_0009|orf6.5898|CA3590|CaO19.9788|CaO19.2248	Acyl CoA:sterol acyltransferase (ASAT); uses cholesterol and oleoyl-CoA substrates; protoberberine derivative drug inhibits enzyme activity; 7 putative transmembrane regions; ketoconazole-induced
orf19.5102	0.369991	0.0110257	PLB5	orf19.12568|IPF13965.2|IPF17127.3|Contig4-2297_0003|orf6.4037|orf6.6348|CA2223|CaO19.5102	Putative phospholipase B, fungal-specific (no human or murine homolog); null mutation eliminates cell-associated phospholipase A2 activity and attenuates virulence; putative GPI anchor
orf19.1654	0.361825	0.0105449		orf19.9223|IPF25652.1|IPF20085.1|Contig4-2710_0007|orf6.3139|CaO19.1654|CaO19.9223	Predicted ORF in Assemblies 19, 20 and 21; increased expression in response to prostaglandins
orf19.1067	0.360381	0.0474478	GPM2	orf19.8669|IPF26265.1|IPF7065.1|GPM1-2|Contig4-2688_0002|orf6.4922|CA2855|CaO19.1067|CaO19.8669	Protein described as phosphoglycerate mutase; decreased expression in hyphae compared to yeast-form cells; macrophage/pseudohyphal-repressed; induced by high levels of peroxide stress, farnesol-induced
orf19.4555	0.357273	0.000714289	ALS4	IPF13009.2|IPF13010.2|IPF22626.1|IPF18130.1|ALS4.3f|Contig4-2046_0006|Contig4-2931_0006|orf6.3075|CA1527|CA1528|CA5173|orf19.4556|orf19.4610.1|ALS4.5f	ALS family protein; role in adhesion and wild-type germ tube induction; growth and temperature regulated; expressed during infection of human buccal epithelial cells; down-regulated upon vaginal contact; putative GPI-anchored
orf19.2969	0.351542	0.0357966	RAD16	orf19.10486|IPF24246.1|IPF15502.2|orf6.2120|CA0917|CaO19.10486|CaO19.2969	Protein similar to S. cerevisiae Rad16p; flucytosine induced
orf19.915	0.351278	0.00354579		IPF17975.2|orf6.568|CA0116|CaO19.915|IPF17975	Predicted ORF in Assemblies 19, 20 and 21
orf19.2296	0.341347	0.0474359		orf19.8300|orf19.9831|IPF25023.1|IPF14282.3|IPF7715.3|IPF29744.1|Contig4-2776_0014|orf6.1793|orf6.3697|orf6.1373|CA0446|CA0706|orf19.682|CaO19.2296|IPF14282.5eoc|IPF14282|IPF14282.2	Predicted ORF in Assemblies 19, 20 and 21; similar to mucins; ketoconazole-induced; fluconazole-downregulated; greater mRNA abundance observed in a cyr1 homozygous null mutant than in wild type; colony morphology-related gene regulation by Ssn6p
orf19.4082	0.333589	0.0142161	DDR48	orf19.11563|orf6.6854|DDR99|IPF23163.1|IPF2075.1|Contig4-3095_0012|CA4336|CaO19.11563|CaO19.4082	Immunogenic stress-associated protein; regulated by filamentous growth pathways; induced by benomyl, caspofungin, or in azole-resistant strain; Hog1p, farnesol, alkaline downregulated; similar to S. cerevisiae Ddr48p
orf19.1097	0.332364	0.0138017	ALS2	orf19.8699|orf19.8700|orf19.9669|orf19.9670|orf6.1311|ALS4|IPF26222.1|IPF26230.1|IPF15450.3|IPF10205.2|IPF25194.1|IPF25217.1|IPF18994.1|IPF16055.3|orf6.3000|orf6.2999|CA1473|CA1471|CA0412|CA0413|orf19.1098|orf19.2121|orf19.2122|ALS12|ALS2.5f	ALS family protein; role in adhesion, biofilm formation, germ tube induction; expressed at infection of human buccal epithelial cells; putative GPI-anchor; induced by ketoconazole, low iron and at cell wall regeneration; regulated by Sfu1p
orf19.3603	0.326367	0.0326559		orf19.11086|IPF23655.1|IPF16222.2|Contig4-1896_0001|Contig4-1896_0002|orf6.2224|CA0978|CaO19.11086|CaO19.3603|IPF16222	Predicted ORF in Assemblies 19, 20 and 21
orf19.6660	0.325135	0.0128155		IPF2283.1|Contig4-3038_0009|orf6.6769|CA4266|CaO19.6660|IPF2283	Predicted ORF in Assemblies 19, 20 and 21
orf19.2121	0.304838	0.0179815		orf19.9669|orf6.1311|ALS4|IPF25194.1|IPF25217.1|IPF18994.1|IPF16055.3|CA0412|ALS12.53eoc	Predicted ORF from Assembly 19; merged with orf19.1097 in Assembly 20
orf19.2048	0.269655	0.0156924		orf19.9596|orf6.5987|IPF25325.1|IPF7458.1|Contig4-3065_0023|CaO19.2048|CaO19.9596	Transcription is positively regulated by Sfu1p
orf19.3746	0.262825	0.0113471	IFC1	orf19.11233|IPF23519.1|IPF4732.2|IPF4737.2|OPT2|Contig4-2422_0002|orf6.5478|CA3257|CA3258|CaO19.11231|OPT22|CaO19.3746|IFC2|orf6.5476	Oligopeptide transporter; transcriptionally induced upon phagocytosis by macrophage; macrophage/pseudohyphal-repressed after 16h; fluconazole-induced; virulence-group-correlated expression; fungal-specific (no human or murine homolog)
orf19.1327	0.237199	0.0310677	RBT1	orf19.8907|orf19.10892|ECE99|IPF19252.2|IPF15385.2|IPF23893.1|IPF16136.1|Contig4-2768_0006|orf6.4889|orf6.489|orf6.2929|CA2830|orf19.3384|CaO19.1327|RBT99	Putative cell wall protein with similarity to Hwp1p, required for virulence; predicted to be cell-wall attached and glycosylated; Tup1p repressed; serum, hyphal and alkaline induced; farnesol, alpha factor induced; Rfg1p-, Rim101p-regulated
orf19.1816	0.220218	0.0470868	ALS3	orf19.9891|orf19.9379|ALS8|IPF25511.1|IPF12561.3|IPF24952.1|IPF12997.2|orf6.2760|ALS2|ALS3-1|CA0591|CA0448|orf19.2355|ALS10|ALS3.5eoc|orf6.1614|IPF12561.2	Adhesin; ALS family; role in epithelial adhesion, endothelial invasiveness; allelic variation in adhesiveness; immunoprotective in mice; predicted GPI-anchor cell wall protein; macrophage, hyphal induced, pH, Nrg1p, Rfg1p, Tup1p regulated
orf19.3374	0.150199	0.014624	ECE1	orf19.10882|IPF23894.1|IPF14152.1|Contig4-2242_0004|orf6.2886|CA1402|CaO19.10882|CaO19.3374	Protein comprising eight 34-residue repeats; hyphal-specific expression increases with extent of elongation of the cell; regulated by Rfg1p, Nrg1p, Tup1p, Cph1p, Efg1p, Hog1p, farnesol, phagocytosis; may contribute to biofilm formation

## Sheet: mfg1_3h37C
Experiment	mfg1 mutant hyphae 3h 37C
Time	3h 37C
Systematic	Normalized	t-test P-value	Common	Synonyms	Description
orf19.655	8.78366	0.00130096	PHO84	orf19.8269|orf19.8765|IPF26171.1|IPF7638.2|IPF26640.1|IPF5438.2|orf6.447|orf6.3437|CA1782|CA0083|orf19.1172|PHO84.5eoc	Protein similar to high-affinity phosphate transporters; expression is regulated upon white-opaque switching or biofilm formation; Hog1p, ciclopirox olamine or alkaline induced; caspofungin or stress repressed; upregulated in RHE model
orf19.1172	7.12737	0.00168876		orf19.8765|PHO84|IPF26171.1|IPF7638.2|orf6.3437|CA1782|CaO19.8765|CaO19.1172|PHO84.3eoc	Protein similar to phosphate transporters; regulated upon white-opaque switching or biofilm formation; Hog1p, ciclopirox olamine or alkaline induced; caspofungin or stress repressed; merged with orf19.655 in Assembly 20
orf19.54	5.51912	0.0110247	RHD1	orf19.7715|IPF27198.1|IPF13148.2|Contig4-2469_0001|orf6.4552|CA2597|BMT2|WRY7|CaO19.7715|CaO19.54|IFQ3	Putative beta-mannosyltransferase, required for the addition of beta-mannose to the acid-labile fraction of cell wall phosphopeptidomannan; member of a 9-gene family; transcriptionally regulated on yeast-hyphal and white-opaque switches
orf19.4688	5.10808	0.00742318	DAG7	orf19.12157|IPF14119.1|IPF28307.1|Contig4-2733_0007|orf6.1768|CA0689|CaO19.4688|CaO19.12157|IPF14119	Predicted ORF in Assemblies 19, 20 and 21; mutation confers hypersensitivity to toxic ergosterol analog; a-specific transcription; alpha-factor induced
orf19.4211	4.9385	0.0406087	FET3	orf19.11687|FET33|IPF11908.2|IPF19406.2|Contig4-2671_0009|Contig4-2671_0010|orf6.176|orf6.5010|CA2924|CaO19.4211|FET31|CaO19.11687	Multicopper oxidase; required for growth under low-iron conditions; null mutant shows decreased prostaglandin E2 production; functional homolog of S. cerevisiae Fet3p; ketoconazole, caspofungin, amphotericin B repressed
orf19.7514	4.08713	0.000672958	PCK1	IPF385.1|Contig4-3107_0068|orf6.8766|CA5857|CaO19.7514	Phosphoenolpyruvate carboxykinase; role in gluconeogenesis; regulated by hyphal switch, carbon source; repressed on glucose; induced by fluconazole, phagocytosis, H2O2; predicted ATP-dependent, dimeric; predicted PKC phosphorylation sites
orf19.1415	4.03122	0.000142592	FRE10	orf19.8991|CFL95|FRE1|RBT2|IPF25902.1|IPF6709.2|Contig4-2963_0017|orf6.6384|CA3957|CaO19.1415|CaO19.8991	Major cell-surface ferric reductase under low-iron conditions; 7 transmembrane regions and a secretion signal predicted; repressed by Tup1p, Rim101p, Ssn6p, Hog1p, caspofungin; ciclopirox olamine induced; not required for filamentous growth
orf19.670.2	3.21181	0.00492312		IPF26615.1|IPF20159.1|CA4106|IPF20159	ORF Predicted by Annotation Working Group
orf19.2602	2.76884	0.000200869	OPT1	orf19.10133|IPF24733.1|IPF14139.2|Contig4-1813_0003|Contig4-2970_0016|orf6.3597|CA1902|CaO19.2602|CaO19.10133	Oligopeptide transporter; transports 3-to-5-residue peptides; alleles are distinct, one has intron; not ABC or PTR type transporter; suppresses S. cerevisiae ptr2-2 mutant defects; induced by BSA or peptides; Stp3p, Hog1p regulated
orf19.4602	2.72562	0.000160625	MDH1-1	orf19.12072|IPF22614.1|IPF6025.2|Contig4-2931_0017|orf6.7901|CA5164|MDH1|CaO19.4602|CaO19.12072	Predicted malate dehydrogenase; macrophage-induced protein
orf19.220	2.687	0.000321572	PIR1	orf19.7851|orf6.474|PIR2|IPF15363.2|IPF19968.1|orf6.5153|CA3030|CaO19.220|IPF19968	Structural protein of cell wall; 1,3-beta-glucan-linked; O-glycosylated by Pmt1p; N-mannosylated; tandem repeats; heterozygous mutant has cell wall defects; hyphal repressed; Hog1p, fluconazole, hypoxia induced; iron, Efg1p, Plc1p regulated
orf19.6725	2.5874	3.736e-05		orf19.14017|IPF20416.1|IPF3641.2|orf6.6874|CA4351|FUM12|FUM1|CaO19.6725|CaO19.14017|FUM12.3f	Protein described as similar to fumarate hydratase, enzyme of citric acid cycle; fluconazole-downregulated; downregulated by Efg1p; merged with orf19.6724 in Assembly 20
orf19.4495	2.56483	1.45791e-06	NDH51	orf19.11971|IPF4781.1|IPF4779.3|Contig4-2993_0009|orf6.2956|orf6.4187|CA2326|NUBM|CaO19.11971|CaO19.4495	Subunit of nicotinamide adenine dinucleotide dehydrogenase complex I, of the mitochondrial electron transport chain; required for wild-type filamentous growth; alkaline downregulated
orf19.3682	2.53721	0.00171433	CWH8	orf19.11166|IPF23608.1|IPF10381.2|Contig4-2750_0005|orf6.2497|CA1146|CaO19.11166|CAX4|CaO19.3682	Putative dolichyl pyrophosphate (Dol-P-P) phosphatase; ketoconazole-induced; expression is increased in a fluconazole-resistant isolate; clade-associated gene expression
orf19.5660.1	2.46915	0.0104956		IPF21567.1|IPF5277.1|Contig4-3054_0013|CA4369|TIM11	ORF Predicted by Annotation Working Group
orf19.4716	2.44888	0.000675439	GDH3	IPF8236.1|Contig4-2812_0004|orf6.3152|CA1579|CaO19.4716|GDH1	Protein described as similar to NADP-glutamate dehydrogenase; hyphal downregulated expression; transcription is regulated by Nrg1p, Plc1p; downregulated by Efg1p; upregulated by Rim101p at pH 8; ciclopirox olamine induced
orf19.3133	2.43354	0.000244593	GUT2	orf19.10645|IPF24162.1|IPF7812.2|Contig4-2291_0005|orf6.5870|CA3566|CaO19.3133|CaO19.10645	Predicted ORF in Assemblies 19, 20 and 21; Plc1p-regulated; transcription is upregulated in both intermediate and mature biofilms
orf19.4698	2.42877	8.3415e-05	PTC8	orf19.12168|IPF22595.1|IPF15977.2|orf6.1685|CA0641|CaO19.12168|DHP99|CaO19.4698|IPF15977	Predicted type 2C protein phosphatase, serine/threonine-specific; required for hyphal growth; induced under stress
orf19.2758	2.35429	0.0178809	PGA38	orf19.10273|orf19.10272|IPF11998.3|IPF17815.2|orf6.1331|orf6.3591|orf6.1332|orf6.3590|CA1898|orf19.2759|IPF11998|IPF11998.2	Putative GPI-anchored protein of unknown function; repressed during cell wall regeneration
orf19.6385	2.33896	4.15442e-05	ACO1	orf19.13742|orf6.7870|ACON|IPF18134.2|IPF12652.2|Contig4-2922_0012|orf6.5837|CA3546|CaO19.13742|CaO19.6385	Protein described as aconitase; Gcn4p-regulated; amino acid starvation (3-AT treatment), amphotericin B, phagocytosis, farnesol induced; fluconazole-downregulated; expression greater in high iron; antigenic in human or murine infection
orf19.2917	2.3329	0.00104214		orf19.10434|IPF24432.1|IPF16748.2|Contig4-2802_0011|orf6.3461|CA1803|CaO19.10434|CaO19.2917|IPF16748	Putative protein of unknown function; heterozygous null mutant exhibits resistance to parnafungin in the C. albicans fitness test; predicted ORF in Assemblies 19, 20 and 21
orf19.6570	2.33251	0.015525	NUP	orf19.13923|orf6.7558|IPF20601.1|IPF1651.1|Contig4-2887_0014|CA4882|CaJ7.0175|NUP32|CaO19.6570|CaO19.13923|CaJ7_0175|CaO19_6570|IPF1651	Nucleoside permease; adenosine and guanosine are substrates, whereas cytidine, adenine, guanine, uridine, uracil are not; similar to a nucleoside permease of S. pombe; possibly processed by Kex2p
orf19.889	2.32017	0.0240522	THI20	orf19.8508|IPF26412.1|IPF3679.2|Contig4-3099_0003|orf6.7288|CA4681|CaO19.8508|CaO19.889|IPF3679	Putative phosphomethylpyrimidine kinase; also described as a putative transcription factor with TENA DNA-binding motif; fungal-specific (no human or murine homolog)
orf19.2785	2.30607	0.0120234	ATP7	orf19.10301|IPF24558.1|IPF7270.1|orf6.3602|CA1907|CaO19.2785|CaO19.10301	Putative subunit of the F1F0-ATPase complex; shows colony morphology-related gene regulation by Ssn6p; farnesol-, macrophage-downregulated protein abundance
orf19.5294	2.30381	0.00188602	PDB1	orf19.12753|IPF21857.1|IPF11877.2|Contig4-2497_0006|orf6.3940|CA2162|CaO19.12753|CaO19.5294	Protein described as similar to pyruvate dehydrogenase; fluconazole-induced; protein level decreased in stationary phase cultures
orf19.4190	2.30345	0.000535242		orf19.11667|IPF23106.1|IPF7999.1|Contig4-2846_0003|orf6.3647|CA1940|PAM18|CaO19.11667|CaO19.4190|IPF7999	Predicted ORF in Assemblies 19, 20 and 21
orf19.6656	2.27565	0.000511961	DUR3	IPF2277.1|Contig4-3038_0003|orf6.6765|CA4263|CaO19.6656|IPF2277	Putative protein of unknown function, transcription is upregulated in clinical isolates from HIV+ patients with oral candidiasis; alkaline downregulated; amphotericin B induced; shows colony morphology-related gene regulation by Ssn6p
orf19.7590	2.26817	0.000128823		IPF690.2|Contig4-3108_0008|Contig4-3108_0010|Contig4-3108_0011|CA5990|CA5991|IPF690.3f|orf19.7591|IPF690.5f|orf6.8938	Protein described as NADH-ubiquinone oxidoreductase; identified in detergent-resistant membrane fraction (possible lipid raft component); predicted N-terminal acetylation; repressed by nitric oxide
orf19.5267	2.25758	0.00148226		orf19.12732|IPF21970.1|IPF2053.1|Contig4-3082_0012|orf6.7675|CA4983|CaO19.12732|CaO19.5267|IPF2053	Putative cell wall protein; downregulated in core caspofungin response; transcription is repressed in response to alpha pheromone in SpiderM medium; transcription repressed in ace2 null mutant
orf19.4577.3	2.2537	0.00869248		IPF22647.1|IPF1024.1|Contig4-3104_0024|CA5140|TIM10	ORF Predicted by Annotation Working Group
orf19.6724	2.24026	0.0167296	FUM12	orf19.14016|orf19.14017|orf6.6873|FUM12.3|IPF20395.1|IPF3640.2|IPF20327.1|IPF18225.1|IPF20416.1|IPF3641.2|orf6.6874|CA4349|CA4350|CA4351|orf19.6724.1|orf19.6725|FUM1|CaO19.14016|CaO19.6724|FUM12.5f	Protein described as similar to fumarate hydratase, enzyme of citric acid cycle; fluconazole-downregulated; downregulated by Efg1p; transcriptionally regulated by iron; expression greater in high iron
orf19.4393	2.23722	0.00222974	CIT1	orf19.11871|orf6.6314|IPF22877.1|IPF28424.1|Contig4-3077_0009|CA3909|CIT1.exon2|IPF3299.1	Protein described as citrate synthase; soluble protein in hyphae; biofilm induced; expression greater in high iron; upregulated upon phagocytosis; Hog1p-downregulated; regulated by Efg1p under yeast-form but not hyphal growth conditions
orf19.3367	2.23366	0.000109014		orf19.10875|IPF10399.1|IPF16677.2|Contig4-2386_0001|orf6.2578|orf6.2893|CA1198|MRPL22|CaO19.3367|IPF10399	Predicted ORF in Assemblies 19, 20 and 21
orf19.4885	2.19987	0.00345576	MIR1	orf19.12349|IPF22456.1|IPF7536.2|Contig4-2934_0003|orf6.3051|CA1513|CaO19.4885|CaO19.12349	Putative mitochondrial phosphate transporter; caspofungin repressed; expression is increased in a fluconazole-resistant isolate; induced upon adherence to polystyrene
orf19.2583.2	2.145	0.0130471		IPF24809.1|IPF2752.1	Pseudogene; formerly an ORF Predicted by Annotation Working Group
orf19.5491.1	2.10593	0.00270419	ATP14	IPF21688.1|IPF5835.2|Contig4-2947_0021|CA2677|ATP14.exon2	ORF Predicted by Annotation Working Group; macrophage/pseudohyphal-induced
orf19.2644	2.09963	0.00199487	QCR2	orf19.10167|IPF24692.1|IPF6978.2|Contig4-2912_0002|orf6.3819|CA2065|CaO19.2644|CaO19.10167	Protein described as ubiquinol-cytochrome-c reductase; antigenic in human; transcriptionally induced by interaction with macrophage; repressed by nitric oxide; in detergent-resistant membrane fraction (possible lipid raft component)
orf19.1253	2.06727	0.00758261		orf19.8838|IPF14649.2|IPF10541.2|Contig4-2799_0001|orf6.3005|orf6.5720|CA3452|CaO19.1253|IPF10541	Predicted ORF in Assemblies 19, 20 and 21; transcriptionally activated by Mnl1p under weak acid stress
orf19.339	2.03246	0.000627025	NDE1	orf19.7972|IPF26993.1|IPF1529.1|NDH1|Contig4-3090_0011|orf6.7223|CA4633|CaO19.7972|CaO19.339	Putative NADH dehydrogenase that could act alternatively to complex I in respiration; caspofungin repressed; fungal-specific (no human or murine homolog); transcription is upregulated in both intermediate and mature biofilms
orf19.5893	2.02571	0.00162732	RIP1	orf19.13314|orf6.9144|IPF21263.1|IPF1859.1|Contig4-3084_0044|CA6149	Protein described as subunit of ubiquinol cytochrome c-reductase; transcriptionally regulated by iron; expression greater in high iron; alkaline downregulated; repressed by nitric oxide
orf19.6918	2.02504	0.00104494		IPF2200.2|Contig4-2895_0007|orf6.7182|CA4599|CaJ7.0152|CaO19.6918|CaJ7_0152|CaO19_6918|IPF2200	Predicted ORF in Assemblies 19, 20 and 21
orf19.93	2.02338	0.00683071		orf19.7739|IPF14895.1|IPF17607.2|Contig4-2306_0003|orf6.159|orf6.3705|CA1987|CaO19.93|IPF14895	Predicted ORF in Assemblies 19, 20 and 21; shows colony morphology-related gene regulation by Ssn6p
orf19.5231.2	1.98159	0.000270724		IPF11271.2|IPF28096.1|CA1107|IPF11271	ORF Predicted by Annotation Working Group
orf19.2091	1.98073	0.00557914		orf19.9638|IPF25295.1|IPF1164.2|Contig4-2971_0016|orf6.7464|CA4810|CaO19.2091|CaO19.9638|IPF1164	Predicted ORF in Assemblies 19, 20 and 21; repressed by nitric oxide
orf19.7586	1.97189	8.64341e-07	CHT3	IPF696.1|Contig4-3108_0002|orf6.8934|CA5987|CaO19.7586	Chitinase, major; functional homolog of S. cerevisiae Cts1p; 4 N-glycosylation motifs; possible O-mannosylated region; putative signal peptide; hyphal-repressed; farnesol upregulated in biofilm; regulated by Efg1p, Cyr1p, Ras1p
orf19.5419	1.96815	0.00588583	ATP5	orf19.12874|IPF21757.1|IPF1114.1|Contig4-2864_0006|orf6.8655|CA5775|CaO19.5419|CaO19.12874	Predicted ORF in Assemblies 19, 20 and 21; caspofungin repressed; protein level decreased in stationary phase cultures
orf19.4826	1.96591	0.000122119	IDH1	orf19.12289|IPF22447.1|IPF11475.1|Contig4-3078_0035|orf6.7385|CA4753|IDH1.3	Predicted ORF in Assemblies 19, 20 and 21; soluble protein in hyphae; protein level decreased in stationary phase cultures
orf19.1264	1.96009	0.000174128	CFL2	orf19.8849|orf6.5731|FRE2|IPF26059.1|IPF8512.2|CFL97|Contig4-2968_0010|Contig4-2968_0011|CA3461|CaO19.8849|CaO19.1264	Iron utilization protein; similar to an S. cerevisiae oxidoreductase, Ynr060Wp; regulated by Sfu1p, Nrg1p, Tup1p, Rim101p; alkaline, low iron, fluphenazine, ciclopirox olamine, flucytosine, induced; caspofungin, amphotericin B repressed
orf19.4587	1.9468	0.00516306	HGH1	orf19.12056|IPF22606.1|IPF1013.1|Contig4-3104_0038|orf6.7886|CA5149|CaO19.12056|CaO19.4587	Transcription is regulated by Mig1p
orf19.3895	1.94646	0.0261719	CHT2	orf19.11376|orf6.2344|IPF19719.2|IPF15860.2|Contig4-2459_0002|CA1051|CaO19.3895	Chitinase; putative N-terminal catalytic domain, GPI anchor, O-mannosylated region, signal peptide; 3 N-glycosylation motifs; downregulated in core caspofungin response; induced in yeast-form cells; Cyr1p-, Efg1p-, pH-regulated
orf19.3797	1.9463	0.0063843		orf19.11278|IPF14249.2|IPF6901.3|Contig4-2569_0002|orf6.2915|orf6.3070|CA1421|MRPL11|CaO19.3797	Predicted ORF in Assemblies 19, 20 and 21
orf19.6534	1.93149	0.0291692		orf19.13887|IPF20649.1|IPF5158.1|Contig4-3024_0020|Contig4-3024_0021|orf6.7626|CA4943|CaO19.13887|CaO19.6534|IPF5158	Predicted ORF in Assemblies 19, 20 and 21
orf19.2711	1.9301	0.000109679		orf19.10226|IPF24584.1|IPF16752.2|Contig4-2190_0002|orf6.2727|CA1291|CaO19.10226|ELP2|CaO19.2711|IPF16752	Predicted ORF in Assemblies 19, 20 and 21; downregulated in core stress response
orf19.2954	1.91847	0.00519468		orf19.10471|IPF24348.1|IPF4421.2|Contig4-2696_0017|orf6.6662|CA4178|CaO19.2954|CaO19.10471|IPF4421	Predicted ORF in Assemblies 19, 20 and 21; repressed by nitric oxide; possibly spurious ORF (Annotation Working Group prediction)
orf19.1710	1.91426	0.000548244		orf19.9277|IPF25643.1|IPF15677.2|Contig4-2424_0009|orf6.3117|CA1557|CaO19.1710|CaO19.9277|IPF15677	Protein described as NADH-ubiquinone oxidoreductase; identified in detergent-resistant membrane fraction (possible lipid raft component); predicted N-terminal acetylation; repressed by nitric oxide
orf19.3066	1.91026	0.00710957	ENG1	orf19.10584|IPF9751.2|IPF28933.1|Contig4-2792_0015|Contig4-2792_0016|Contig4-2952_0001|orf6.7803|YNR67|ACF3|orf19.71|DSE4|CaO19.3066|CA5091	Endo-1,3-beta-glucanase required for cell separation after division, orthologous to S. cerevisiae Dse4p; caspofungin repressed; fungal-specific (no human or murine homolog); repressed in response to alpha pheromone in SpiderM medium
orf19.1956	1.8854	0.00143292		orf19.9511|IPF19331.2|IPF14757.2|Contig4-2143_0002|orf6.342|orf6.4083|CA2256|CaO19.1956|IPF14757	Predicted ORF in Assemblies 19, 20 and 21
orf19.4016	1.88064	0.0214079		orf19.11499|IPF23251.1|IPF3358.2|Contig4-3094_0036|orf6.7429|CA4783|CaO19.4016|COR1|CaO19.11499|IPF3358	Predicted ORF in Assemblies 19, 20 and 21; amphotericin B induced; repressed by nitric oxide; protein level decreased in stationary phase cultures
orf19.4697	1.88063	0.00253701	MDN1	orf19.12167|IPF22610.1|IPF11189.3|Contig4-1657_0002|Contig4-1657_0003|Contig4-2496_0003|orf6.1058|orf6.1684|orf6.1709|orf6.759|CA0283|CaO19.4697|IPF18034|IPF18034.2	Protein induced during the mating process
orf19.5762	1.87263	0.00184199	PGA61	orf19.13185|IPF21476.1|IPF20148.1|Contig4-3026_0024|orf6.6196|CA3826|CaO19.5762|CaO19.13185|IPF20148	Putative GPI-anchored protein of unknown function; possibly spurious ORF (Annotation Working Group prediction)
orf19.111	1.87206	0.00735679	CAN2	orf19.7758|IPF27165.1|IPF11927.1|Contig4-2501_0008|orf6.2565|CAN1|CaO19.111|CaO19.7758|CA1191|CA1192|IPF11926|IPF11926.1	Putative amino acid permease; transcription is regulated by Nrg1p and Tup1p; caspofungin induced; flucytosine induced; shows colony morphology-related gene regulation by Ssn6p; ; fungal-specific (no human or murine homolog)
orf19.1896	1.86781	0.000233093	SSC1	orf19.9452|IPF25425.1|IPF6450.2|Contig4-2752_0006|Contig4-2752_0008|orf6.7024|CA4474|CaO19.9452|CaO19.1896	Heat shock protein; at surface of yeast-form cells, but not hyphae; antigenic; soluble in hyphae; Gcn4p-regulated; induced upon amino acid starvation (3-aminotriazole) or upon adherence to polystyrene; macrophage-downregulated protein
orf19.2671	1.86481	0.00213732		orf19.10186|orf6.154|IPF24612.1|IPF10564.2|Contig4-2584_0001|orf6.5563|CA3328|CaO19.2671|CaO19.10186|IPF10564	Predicted ORF in Assemblies 19, 20 and 21; Plc1p-regulated
orf19.4681	1.86358	0.000673615	RAT1	orf19.12150|IPF22542.1|IPF7491.1|Contig4-2949_0009|Contig4-2949_0010|orf6.5455|CA3242|CaO19.12150|CaO19.4681	5'-->3' exoribonuclease; similar to S. cerevisiae nuclear exoribonuclease Rat1p; suppresses S. cerevisiae kem1 mutant slow growth, mating defect, and haploid invasive growth defect
orf19.4611	1.85638	1.70886e-05		orf19.12081|IPF22617.1|IPF6040.1|Contig4-2931_0004|orf6.7910|CA5174|CaO19.12081|PRS4|CaO19.4611	Predicted ORF in Assemblies 19, 20 and 21
orf19.5063	1.84919	0.002635		orf19.12529|IPF17932.1|IPF13493.1|Contig4-1378_0002|Contig4-1944_0005|orf6.1609|orf6.468|CA0586|CaO19.5063|IPF13493	Predicted ORF in Assemblies 19, 20 and 21; ciclopirox olamine induced; regulated by Ssn6p; induced by nitric oxide in yhb1 mutant
orf19.6531	1.84863	0.000449979	NUC2	orf19.13884|IPF20595.1|IPF5150.1|Contig4-3024_0028|orf6.7629|CA4947|CaJ7.0217|CaO19.13884|CaO19.6531|CaO19_6531|CaJ7_0217	Protein described as NADH-ubiquinone oxidoreductase; identified in detergent-resistant membrane fraction (possible lipid raft component); alkaline downregulated
orf19.2871	1.84544	0.012488	SDH12	orf19.10389|IPF3247.1|IPF28944.1|Contig4-3009_0023|orf6.4380|CA2470|SDHA|SDH3|SDH1|CaO19.2871|CaO19.10389	Protein with similarity to S. cerevisiae SDH1, which is a flavoprotein subunit of succinate dehydrogenase; soluble protein in hyphae; macrophage-downregulated protein level; downregulated by Efg1p; repressed by nitric oxide
orf19.1306	1.84498	1.20797e-05		orf19.8886|IPF26019.1|IPF6679.1|orf6.2774|CA1326|CaO19.8886|CaO19.1306|IPF6679	Predicted ORF in Assemblies 19, 20 and 21
orf19.4676	1.83919	2.55787e-06		orf19.12146|IPF22636.1|IPF15832.1|Contig4-2949_0002|orf6.5460|CA3247|CaO19.12146|CaO19.4676|IPF15832	Predicted ORF in Assemblies 19, 20 and 21
orf19.7384	1.8336	0.00151945	NOG1	IPF1302.2|Contig4-3036_0030|orf6.8544|CA5682|CaO19.7384	Predicted ORF in Assemblies 19, 20 and 21; mutation confers hypersensitivity to 5-fluorocytosine (5-FC), 5-fluorouracil (5-FU), and tubercidin (7-deazaadenosine); decreased expression in response to prostaglandins
orf19.1222	1.83182	0.00147986		IPF15693.2|Contig4-2844_0012|orf6.850|CA0204|CaO19.1222|IKI3	Predicted ORF from Assembly 19; merged with orf19.2631 in Assembly 20
orf19.6062.3	1.82346	4.47822e-05		IPF21126.1|IPF1413.1|Contig4-2977_0010|CA4923|IPF1413.3f|IPF1413.3	ORF Predicted by Annotation Working Group
orf19.4311	1.81188	0.00036871	YNK1	orf19.11786|IPF18653.1|IPF2914.1|Contig4-2902_0014|orf6.3163|orf6.4616|CA2645|CaO19.4311	Nucleoside diphosphate kinase (NDP kinase); homo-hexameric; soluble protein in hyphae; flucytosine induced; biofilm induced; macrophage-induced protein; protein detected by mass spec in stationary phase cultures
orf19.287	1.80581	0.00501313		orf19.7919|IPF27050.1|IPF3810.1|Contig4-3050_0025|orf6.4816|CA2784|CaO19.7919|CaO19.287|IPF3810	Predicted ORF in Assemblies 19, 20 and 21; repressed by nitric oxide; identified in detergent-resistant membrane fraction (possible lipid raft component)
orf19.3363	1.80557	0.00436454	VTC4	orf19.10871|IPF16674.3|IPF15753.2|Contig4-2353_0002|orf6.1784|orf6.2574|CA0697|CaO19.3363	Protein described as polyphosphate synthetase; decreased expression in hyphae compared to yeast-form cells; fungal-specific (no human or murine homolog); virulence-group-correlated expression
orf19.3618	1.79931	0.00209323	YWP1	orf19.11101|orf6.3288|FLO1|TEP1|IPF5185|CA1678|PGA24|IPF23664.1|IPF5185.2|Contig4-2227_0007|CaO19.3618|CaO19.11101	Protein with suggested role in dispersal in host; mutation causes increased adhesion and biofilm formation; putative GPI-anchor; cell wall and secreted; has stable propeptide; regulated by growth phase, phosphate, Ssk1p, Ssn6p, Efg1p, Efh1p
orf19.4396	1.79692	0.000817361		orf19.11874|IPF20149.1|IPF20043.1|Contig4-3077_0003|orf6.589|orf6.6311|CA3906|CaO19.4396|FMP13|IPF20149	Predicted ORF in Assemblies 19, 20 and 21
orf19.789	1.78687	0.00573723	PYC2	orf19.8408|orf6.2989|IPF26382.1|IPF26504.1|IPF15163.2|IPF15167.2|Contig4-3027_0007|CA1464|PYC2.3f|PYC2.exon2	Putative pyruvate carboxylase, binds to biotin cofactor; up-regulated in mutant lacking the Ssk1p response regulator protein, upon benomyl treatment, or in an azole-resistant strain overexpressing MDR1
orf19.1291	1.78498	0.000529773	ABZ1	orf19.9352|orf19.9353|IPF10474.2|Contig4-2660_0010|Contig4-2660_0012|orf6.1155|orf6.910|orf6.1154|CA0220|orf19.1786|orf19.1787|CaO19.1291	Protein not essential for viability; similar to S. cerevisiae Abz1p, which is para-aminobenzoate (PABA) synthase; reports differ on whether a murine homolog exists
orf19.3290	1.78231	0.0049195		orf19.10800|IPF23959.1|IPF12601.1|Contig4-2295_0003|orf6.1780|CA0695|CaO19.3290|CaO19.10800|IPF12601	Predicted ORF in Assemblies 19, 20 and 21; repressed by nitric oxide
orf19.7062	1.77977	0.0112587	RPA135	IPF479.1|Contig4-3106_0073|orf6.8491|CA5633|CaJ7.0071|CaO19.7062|CaJ7_0071|CaO19_7062	Predicted ORF in Assemblies 19, 20 and 21; decreased expression in response to prostaglandins
orf19.3757	1.77899	0.00119759	ATP20	orf19.11241|IPF23516.1|IPF8902.2|Contig4-2804_0001|orf6.2263|CA1003|CaO19.3757|CaO19.11241	Predicted ORF in Assemblies 19, 20 and 21; shows colony morphology-related gene regulation by Ssn6p; flucytosine induced; caspofungin repressed; macrophage/pseudohyphal-induced
orf19.7219	1.77108	0.00200618	FTR1	orf6.8119|IPF868.1|Contig4-3043_0004|CA5345|CaO19.7219	High-affinity iron permease (ferric citrate, ferrioxamines E or B, transferrin); required for mouse virulence, low-iron growth; iron, amphotericin B, caspofungin, ciclopirox, Hog1p regulated; complements S. cerevisiae ftr1 iron transport
orf19.3103	1.77065	0.00276247		orf19.10615|IPF24220.1|IPF13155.2|Contig4-2940_0002|Contig4-2940_0003|orf6.6942|CA4407|CaO19.3103|RPO3|RPO31	Predicted ORF in Assemblies 19, 20 and 21
orf19.5293	1.76864	0.00997345		orf19.12751|IPF19472.2|IPF11879.2|Contig4-2497_0003|Contig4-2497_0004|orf6.35|orf6.3941|CA2163|ACT2|CaO19.5293|CaO19.12751|IPF11879	Predicted ORF in Assemblies 19, 20 and 21
orf19.3559	1.76724	7.63131e-05		orf19.11043|orf19.11044|IPF23746.1|IPF23749.1|IPF3184.1|IPF3182.1|Contig4-2222_0002|Contig4-2222_0003|orf6.1603|orf6.1602|CA0579|orf19.3560|IPF3184|CA0580|IPF3184.exon2|IPF3184.exon1	Predicted ORF in Assemblies 19, 20 and 21
orf19.2738	1.76217	0.00687626	SUL2	orf19.10252|orf6.4694|SUL1|IPF14417.2|IPF28993.1|Contig4-2105_0001|CA2698	Protein described as a sulfate transporter; transcription is negatively regulated by Sfu1p; induced upon biofilm formation; amphotericin B induced
orf19.4635	1.76073	0.00231414	NIP1	orf19.12105|IPF22546.1|IPF8998.2|Contig4-2825_0008|orf6.1839|orf6.2373|CA0733|CaO19.4635	Putative translation initiation factor; mutation confers hypersensitivity to roridin A and verrucarin A; genes encoding ribosomal subunits, translation factors, and tRNA synthetases are downregulated upon phagocytosis by murine macrophage
orf19.1873	1.75638	0.00164498		orf19.9429|IPF4044.1|IPF17567.2|Contig4-3010_0011|orf6.282|orf6.7047|CaO19.1873	Predicted ORF in Assemblies 19, 20 and 21; repressed by nitric oxide; possibly spurious ORF (Annotation Working Group prediction)
orf19.3507	1.75362	0.0110999	MCR1	orf19.11001|IPF23768.1|IPF12231.1|Contig4-2540_0002|orf6.4367|CA2457|CaO19.3507|CaO19.11001	Protein described as NADH-cytochrome-b5 reductase; soluble protein in hyphae; biofilm induced; alkaline downregulated; ketoconazole or flucytosine induced, farnesol-induced
orf19.3675	1.75202	0.00112894	GAL7	orf19.11159|IPF23601.1|IPF9203.2|Contig4-2775_0014|orf6.6486|CA4044|CaO19.11159|CaO19.3675	Predicted ORF in Assemblies 19, 20 and 21; macrophage/pseudohyphal-repressed
orf19.3365	1.74796	0.00029275	DAO2	orf19.10873|IPF10395.2|IPF18896.1|Contig4-2386_0006|orf6.1786|orf6.2576|CA0699|IFG2.5f|CA1197|IFG1	Putative D-amino acid oxidase
orf19.6047	1.74606	0.0104309	TUF1	orf19.13468|IPF21060.1|IPF1439.1|Contig4-3053_0014|orf6.7591|CA4909|CaO19.6047|CaO19.13468	Putative translation elongation factor; macrophage/pseudohyphal-induced; genes encoding ribosomal subunits, translation factors, and tRNA synthetases are downregulated upon phagocytosis by murine macrophage
orf19.5791	1.74106	0.00380939	IDH2	orf19.13213|orf6.6625|IPF6833.2|IPF27911.1|Contig4-2708_0009|CA4148|CaO19.5791	Protein described as isocitrate dehydrogenase subunit; transcription is upregulated in response to treatment with ciclopirox olamine; transcriptionally regulated by iron; expression greater in high iron
orf19.3733	1.74068	0.00219614	IDP2	orf19.11218|IPF9177.2|Contig4-3070_0023|orf6.1691|orf6.5462|CA0643|CaO19.3733	Putative isocitrate dehydrogenase; expression is regulated upon white-opaque switching; shows colony morphology-related gene regulation by Ssn6p; protein detected by mass spec in exponential and stationary phase cultures
orf19.1030	1.73739	0.00389574		orf19.8632|IPF26252.1|IPF14314.2|Contig4-2064_0001|orf6.3221|CA1629|FPR3|CaO19.1030|NPI46	Predicted ORF in Assemblies 19, 20 and 21
orf19.3812	1.73172	0.00347463	SSZ1	orf19.11293|IPF23457.1|IPF6943.1|Contig4-2979_0013|orf6.7507|CA4844|PDR13|CaO19.11293|CaO19.3812	Protein described as an HSP70 chaperone; protein level decreased in stationary phase cultures
orf19.4932	1.72689	0.00515371		orf19.12398|IPF22213.1|IPF12940.2|Contig4-2611_0010|orf6.5912|CA3603|MEF1|CaO19.12398|CaO19.4932	Predicted ORF in Assemblies 19, 20 and 21
orf19.7011	1.71444	0.00106028		IPF2342.1|Contig4-3091_0046|orf6.7937|CA5197|CaJ7.0121|CaO19_7011|CaJ7_0121|CaO19.7011|IPF2342	Predicted ORF in Assemblies 19, 20 and 21
orf19.4191	1.71282	0.0184587	RLP24	orf19.11668|IPF23102.1|IPF7998.1|Contig4-2846_0001|orf6.3648|CA1941|CaO19.4191|CaO19.11668|IPF7998	Predicted ORF in Assemblies 19, 20 and 21; essential; S. cerevisiae ortholog is essential; heterozygous mutation confers hypersensitivity to 5-fluorocytosine (5-FC), 5-fluorouracil (5-FU), and tubercidin (7-deazaadenosine)
orf19.6126	1.70039	0.00287469	KGD2	orf19.13545|orf6.5107|IPF20983.1|IPF8851.2|Contig4-2655_0006|CA2997|CaO19.13545|CaO19.6126	Protein described as dihydrolipoamide S-succinyltransferase; transcriptionally regulated by iron; expression greater in high iron
orf19.2990	1.69422	0.0443917	XOG1	orf19.10507|EXG|EXG1|IPF24307.1|IPF14073.2|Contig4-2184_0004|orf6.1982|CA0822|CaO19.2990	Exo-1,3-beta-glucanase, major exoglucanase; member of family 5 glycosyl hydrolases; affects sensitivity to inhibitors of chitin and glucan synthesis; not required for yeast-to-hyphal transition or for virulence in mouse systemic infection
orf19.7042	1.69273	1.52016e-05		IPF3080.2|IPF3080|Contig4-2855_0017|orf6.7968|CA5223|CaJ7.0090|CaO19_7042|CaJ7_0090|CaO19.7042	Increased transcription is observed upon benomyl treatment or in an azole-resistant strain that overexpresses MDR1; induced by nitric oxide
orf19.1276	1.69154	0.0489798		orf19.8863|IPF26090.1|IPF12292.2|orf6.2899|YOR054|CA6187|CaO19.1276|CaO19.8863|IPF12292	Predicted ORF in Assemblies 19, 20 and 21; not essential for viability; similar to S. cerevisiae Vhs3p, which is a putative phosphopantothenoylcysteine decarboxylase
orf19.1250	1.69098	6.34031e-06		orf19.8834|IPF26082.1|IPF16428.2|orf6.3009|CA1479|CaO19.1250|CaO19.8834|IPF16428	Predicted ORF in Assemblies 19, 20 and 21
orf19.2881	1.68731	0.0012356	MNN4	orf19.10399|orf6.4390|IPF16016.2|IPF28958.1|Contig4-2084_0003|orf6.296|CA2477|CaO19.2881|IPF16016	Protein required for normal mannosylphosphorylation of oligosaccharides linked to cell wall proteins, not required for virulence or kidney colonization in mouse systemic infection or for normal interaction with macrophages
orf19.6865	1.68341	0.00263328		orf19.14155|IPF20275.1|IPF9835.1|orf6.7014|CaO19.14155|CaO19.6865	Predicted ORF from Assembly 19; merged with orf19.2631 in Assembly 20
orf19.6165	1.68125	0.00758028	KGD1	IPF19778.1|Contig4-2897_0018|orf6.5326|CA3149|CaO19.6165	Protein described as 2-oxoglutarate dehydrogenase; regulated by Efg1p under yeast-form but not hyphal growth conditions; transcription is upregulated in an RHE model of oral candidiasis; detected by mass spec in stationary phase cultures
orf19.3778	1.67867	0.0198841		orf19.11259|orf19.11260|IPF23474.1|IPF23478.1|IPF15219.2|IPF15217.2|Contig4-2648_0005|Contig4-2648_0007|orf6.2592|orf6.1133|orf6.1132|CA0328|CA0327|orf19.3779|IPF15217.3f	Predicted ORF in Assemblies 19, 20 and 21; mutation confers hypersensitivity to 5-fluorocytosine (5-FC), 5-fluorouracil (5-FU); downregulated in core stress response; decreased expression in response to prostaglandins
orf19.5640	1.67864	0.00563198	PEX5	orf19.13085|IPF21521.1|IPF12357.2|Contig4-2558_0005|orf6.4509|CA2560|CaO19.5640|CaO19.13085	Protein of the Pex5p family; required for PTS1-mediated peroxisomal protein import, fatty acid beta-oxidation; similar to S. cerevisiae Pas10p peroxisomal targeting receptor; macrophage/pseudohyphal-repressed
orf19.1578	1.67628	0.000198234		orf19.9151|IPF25824.1|IPF9638.2|Contig4-3005_0028|Contig4-3005_0029|orf6.5342|CA3165|CaO19.1578|RRP5|CaO19.9151|FMI1	Predicted ORF in Assemblies 19, 20 and 21
orf19.1272	1.67585	0.00148658		orf19.8858|IPF26080.1|IPF10270.2|Contig4-2192_0009|orf6.2164|CA0948|CaO19.8858|CaO19.1272|IPF10270	Predicted ORF in Assemblies 19, 20 and 21
orf19.6959	1.67406	0.00722281	HOM32	IPF27383.1|Contig4-2681_0005|orf6.7390|CaO19.6959|HOM3	Putative L-aspartate 4-P-transferase; fungal-specific (no human or murine homolog); removed from Assembly 20
orf19.5547	1.67331	0.0032934		orf19.12993|IPF19861.2|IPF19862.1|Contig4-2173_0008|orf6.1296|CA0406|CaO19.5547|IPF19862.5f|CA0405|IPF19862.3f|IPF19861.1	Predicted ORF in Assemblies 19, 20 and 21
orf19.4167	1.66935	6.31884e-05		orf19.11643|IPF6192.2|IPF17807.3|orf6.125|orf6.6061|CA3717|CaO19.4167|IPF6192	Predicted ORF in Assemblies 19, 20 and 21
orf19.5064	1.66457	0.00240303	MRPL3	orf19.12530|IPF22138.1|IPF19552.2|Contig4-1944_0004|orf6.134|orf6.469|CA0089|CaO19.12530|CaO19.5064|IPF19552.1	Predicted ORF in Assemblies 19, 20 and 21; downregulated in core stress response; protein detected by mass spec in exponential and stationary phase cultures
orf19.2631	1.66147	0.00369605		orf19.14155|IPF15693.2|IPF18972.1|IPF20275.1|IPF9835.1|Contig4-2844_0012|orf6.850|orf6.1436|orf6.7014|CA0204|orf19.1222|orf19.6865|CaO19.2631	Predicted ORF in Assemblies 19, 20 and 21
orf19.1305	1.66094	0.00963478		orf19.8885|IPF26017.1|IPF6680.2|Contig4-1569_0002|Contig4-2781_0001|orf6.2775|CA1327|CaO19.1305|CaO19.8885|IPF6680	Predicted ORF in Assemblies 19, 20 and 21
orf19.2707.1	1.66003	0.00797583	QCR9	IPF24583.1|IPF14357.1|Contig4-1779_0001|CA0376	ORF Predicted by Annotation Working Group; shows colony morphology-related gene regulation by Ssn6p
orf19.1770	1.6598	0.0179236	CYC1	orf19.9339|orf6.244|IPF25577.1|IPF17424.2|Contig4-1661_0006|CA0038|CaO19.1770|CaO19.9339	Cytochrome c; complements defects of an S. cerevisiae cyc1 cyc7 double mutant; transcriptionally regulated by iron; expression greater in high iron; alkaline downregulated; repressed by nitric oxide
orf19.5305	1.658	0.0398793	RHD3	orf19.12765|orf6.8294|PGA29|IPF21875.1|IPF8527.1|Contig4-2961_0009|CA5476|LDG7|CaO19.12765|CaO19.5305|IPF8527	Putative GPI-anchored protein that localizes to the cell wall; transcription is decreased upon yeast-hyphal switch; transcriptionally regulated by iron; expression greater in high iron; clade-associated gene expression
orf19.5235	1.6551	0.000346718		orf19.12699|IPF13943|IPF21961.1|IPF13943.2|Contig4-3067_0032|orf6.7707|CA5012|CaO19.12699|CaO19.5235	Protein not essential for viability; protein level decreased in stationary phase cultures
orf19.1277	1.65476	0.0111727		orf19.8864|IPF19348.2|IPF11858.2|Contig4-2741_0002|orf6.2900|orf6.303|CA1411|CaO19.1277|IPF11858	Predicted ORF in Assemblies 19, 20 and 21; repressed by Rgt1p
orf19.3670	1.64857	0.00853027	GAL1	orf19.11154|IPF23594.1|IPF5296.2|Contig4-3059_0016|orf6.6481|CA4040|CaO19.11154|CaO19.3670	Galactokinase; transcription regulated by galactose; transcription regulated by Mig1p and Tup1p; not required for systemic mouse virulence; farnesol-downregulated in biofilm; fluconazole-induced
orf19.637	1.6439	0.0174837	SDH2	orf19.8251|orf6.3524|IPF26670.1|IPF11123.1|Contig4-2852_0010|CA1845|CaO19.8251|CaO19.637|IPF11123	Succinate dehydrogenase, Fe-S subunit; localizes to surface of yeast-form cells, but not hyphae; transcriptionally regulated by iron; expression greater in high iron; repressed by nitric oxide; induced during log phase (aerobic growth)
orf19.6136	1.64132	0.000220806		orf19.13555|IPF20986.1|IPF12778.1|Contig4-2201_0003|orf6.5678|CA3419|CaO19.6136|MRPL4|CaO19.13555|IPF12778	Predicted ORF in Assemblies 19, 20 and 21; repressed by nitric oxide
orf19.2667	1.63952	0.000700437	RPF1	orf19.10184|IPF12428.1|IPF12157.3|Contig4-3083_0028|orf6.1627|orf6.5567|CA0599|CaO19.2667|IPF12428	Predicted ORF in Assemblies 19, 20 and 21; essential for growth
orf19.1235	1.63309	0.00890472	HOM3	orf19.8820|IPF26072.1|IPF14675.2|orf6.5082|CA2977|CaO19.8820|CaO19.1235	Putative L-aspartate 4-P-transferase; fungal-specific (no human or murine homolog); regulated by Gcn2p and Gcn4p
orf19.4593	1.62955	0.000448279	RGA2	orf19.12062|IPF22680.1|IPF1000.1|Contig4-3104_0056|orf6.7892|CA5154|CaO19.4593|CaO19.12062	Putative GTPase-activating protein (GAP) for Rho-type GTPase Cdc42p; involved in cell signaling pathways that control cell polarity; similar to S. cerevisiae Rga2p; induced upon low-level peroxide stress
orf19.3098	1.62193	0.00292675		orf19.10610|IPF24199.1|IPF1751.2|Contig4-2877_0004|orf6.6947|CA4411|CaO19.10610|BRR2|CaO19.3098	Predicted ORF in Assemblies 19, 20 and 21
orf19.4176	1.61683	0.00361131		orf19.11652|IPF23099.1|IPF6175.1|Contig4-2228_0001|orf6.6070|CA3726|MRPS17|CaO19.4176|CaO19.11652|IPF6175	Predicted ORF in Assemblies 19, 20 and 21
orf19.3129	1.61067	0.00532918		orf19.10641|IPF24175.1|IPF7823.2|Contig4-2672_0010|orf6.5866|CA3562|RVB1|CaO19.10641|CaO19.3129|IPF7823	Predicted ORF in Assemblies 19, 20 and 21; heterozygous null mutant displays sensitivity to virgineone
orf19.5661	1.60854	0.00224377	PTC7	orf19.13106|YHR76|IPF21537.1|IPF5279.1|Contig4-3054_0012|orf6.6901|CA4370|CaO19.5661|CaO19.13106|IPF5279	Protein phosphatase, type 2C; has S/T phosphatase activity, Mn2+/Mg2+ dependent; predicted membrane-spanning segment and mitochondrion-targeting signal
orf19.5515	1.60265	0.00265525		orf19.12961|IPF21602.1|IPF4312.2|Contig4-2439_0006|orf6.4457|CA2518|CaO19.12961|CBP3|CaO19.5515	Predicted ORF in Assemblies 19, 20 and 21
orf19.5850	1.60017	0.00292962	NOC2	orf19.13272|IPF21359.1|IPF3784.1|Contig4-2975_0006|orf6.4952|RAD4|CA2881|CaO19.13272|CaO19.5850	Protein similar to S. cerevisiae Noc2p; transposon mutation affects filamentous growth; mutation confers hypersensitivity to 5-fluorouracil (5-FU), tubercidin (7-deazaadenosine); downregulated during core stress response
orf19.5296	1.59962	0.00144381		orf19.12755|IPF21874.1|IPF15664.2|orf6.3938|CA2160|FMP35|CaO19.12755|CaO19.5296|IPF15664	Predicted ORF in Assemblies 19, 20 and 21
orf19.4758	1.59668	0.000296834		orf19.12222|IPF22468.1|IPF14389.2|Contig4-2557_0006|orf6.4597|CA2631|CaO19.4758|CaO19.12222|IPF14389	Predicted ORF in Assemblies 19, 20 and 21; alkaline downregulated
orf19.4159	1.59446	0.0197433		orf19.11635|IPF23093.1|IPF15660.2|Contig4-1990_0003|orf6.2623|CA1226|CaO19.4159|CaO19.11635|IPF15660	Predicted ORF in Assemblies 19, 20 and 21
orf19.7215	1.59406	0.00227348		IPF883.1|Contig4-3017_0022|orf6.8115|CA5340|CaO19.7215|IPF883	Predicted ORF in Assemblies 19, 20 and 21
orf19.6696	1.59357	0.0064343	TIM9	orf19.13988|IPF20492.1|IPF2599.1|Contig4-3088_0031|orf6.6805|CA4298|CaJ7.0415|CaO19.13988|CaJ7_0415|CaO19_6696|CaO19.6696	Predicted ORF in Assemblies 19, 20 and 21; transcription is upregulated in both intermediate and mature biofilms
orf19.7569	1.5901	0.000842462	SIK1	IPF929.2|Contig4-3105_0047|orf6.8917|CA5975|CaO19.7569	Predicted ORF in Assemblies 19, 20 and 21; physically interacts with TAP-tagged Nop1p
orf19.300	1.58875	0.0119657	AIP2	orf19.7932|orf19.7933|IPF26999.1|IPF3840.1|Contig4-3050_0007|orf6.4293|CA2406|CaO19.300|DLD2|CaO19.7932	Protein described as an actin interacting protein; regulated by Gcn4p; induced in response to amino acid starvation (3-aminotriazole treatment); repressed in the presence of elevated CO2
orf19.4318	1.58566	0.00052556	MIG1	orf19.11793|IPF22963.1|IPF11048.2|Contig4-2700_0004|orf6.3170|CA1593|CaO19.11793|CaO19.4318	Transcriptional repressor; regulates genes for utilization of carbon sources; Tup1p-dependent and -independent functions; upregulated in biofilm; hyphal downregulated; caspofungin repressed; functional homolog of S. cerevisiae Mig1p
orf19.1440	1.58508	0.00270999		orf19.9015|IPF25887.1|IPF10568.1|Contig4-2265_0003|orf6.1052|CA0279|CaO19.1440|IPF10568	Predicted ORF in Assemblies 19, 20 and 21; possibly spurious ORF (Annotation Working Group prediction)
orf19.5747	1.5836	0.0142286		orf19.13170|IPF15124.2|IPF27934.1|Contig4-2858_0007|orf6.2926|CA1428|MRP4|CaO19.5747|CaO19.13170	Predicted ORF in Assemblies 19, 20 and 21
orf19.4813	1.58335	0.0070055	GUA1	orf19.12276|IPF22419.1|IPF6105.2|Contig4-2674_0006|orf6.5219|CA3075|CaO19.12276|CaO19.4813|IPF6105	Predicted ORF in Assemblies 19, 20 and 21; soluble protein in hyphae; flucytosine induced; macrophage-downregulated protein abundance; protein level decreased in stationary phase cultures
orf19.1682	1.58105	0.00628243		orf19.9251|IPF25637.1|IPF11681.2|Contig4-2363_0002|orf6.889|CA0216|CaO19.1682|CaO19.9251|IPF11681	Predicted ORF in Assemblies 19, 20 and 21; repressed by nitric oxide
orf19.3527	1.57822	0.00977672	CYT1	orf19.11011|orf6.1503|orf6.2040|IPF23744.1|IPF4458.2|Contig4-2446_0010|CA0864|CaO19.3527|CA0524|CYT12|IPF18952.1	Protein described as cytochrome c1; transcriptionally regulated by iron; expression greater in high iron; alkaline downregulated
orf19.1839	1.57403	0.0110701	RPA190	orf19.9397|IPF25490.1|IPF10842.2|Contig4-2684_0001|Contig4-2684_0002|orf6.4247|CA2368|CaO19.9397|CaO19.1839	Predicted ORF in Assemblies 19, 20 and 21;flucytosine induced
orf19.4622	1.5722	3.91689e-05		orf19.12092|IPF22603.1|IPF11090.1|Contig4-2945_0009|orf6.7921|CA6310|CA5183|CaO19.12092|CaO19.4622|IPF11090.5f|IPF11090.53f|IPF11090.exon1	Predicted ORF in Assemblies 19, 20 and 21
orf19.7443	1.57091	0.0255479		IPF2873.1|Contig4-2076_0001|orf6.8603|CA5733|CaO19.7443|IPF2873	Predicted ORF in Assemblies 19, 20 and 21
orf19.4171	1.57088	0.00426001		orf19.11647|IPF6186.1|IPF17597.2|Contig4-2878_0005|orf6.101|orf6.6065|CA3721|CaO19.4171|IPF6186	Predicted ORF in Assemblies 19, 20 and 21
orf19.4609	1.56945	0.000790996		orf19.12079|IPF22624.1|IPF6037.1|Contig4-2931_0007|orf6.7908|CA5171|CaO19.12079|CaO19.4609|IPF6037	Protein abundance is affected by URA3 expression in the CAI-4 strain background; protein detected by mass spec in exponential and stationary phase cultures
orf19.3629	1.56863	0.00247342	DSE1	orf19.11112|IPF23656.1|IPF10835.2|Contig4-2517_0008|Contig4-2517_0009|orf6.2710|CA1278|CaO19.3629|CaO19.11112|IPF10835	Predicted cell wall protein; transcription is decreased in mutant lacking ACE2; periodic mRNA expression, peak at cell-cycle M/G1 phase
orf19.5477	1.56551	0.0231626		orf19.12932|ECM17|IPF21658.1|IPF13588.2|Contig4-2950_0017|orf6.4171	Putative sulfite reductase; greater mRNA abundance observed in cyr1 or efg1 homozygous null mutant hyphae; merged with orf19.4099 in Assembly 20
orf19.2439	1.56394	0.000130075		orf19.9975|IPF24877.1|IPF16565.1|Contig4-2388_0002|orf6.3617|CA1915|CaO19.2439|ACP12|CaO19.9975|IPF16565	Predicted ORF in Assemblies 19, 20 and 21; shows colony morphology-related gene regulation by Ssn6p
orf19.2754	1.56248	0.000619988		orf19.10268|IPF24668.1|IPF10200.2|Contig4-2786_0003|orf6.3586|CA1893|CaO19.10268|TIM13|CaO19.2754	Predicted ORF in Assemblies 19, 20 and 21
orf19.2977	1.56239	0.000242001		orf19.10494|IPF24332.1|IPF7324.2|Contig4-2816_0002|orf6.5712|CA3446|CaO19.10494|CaO19.2977|IPF7324	Predicted ORF in Assemblies 19, 20 and 21
orf19.1789	1.56166	0.0107861		orf19.9355|IPF25532.1|IPF10470.2|Contig4-2660_0001|orf6.1157|CA0342|CaO19.9355|CaO19.1789|IPF10470	Predicted ORF in Assemblies 19, 20 and 21
orf19.3836	1.55859	6.05387e-05		orf19.11317|IPF23468.1|IPF4094.1|Contig4-3060_0009|orf6.7531|CA4861|CaO19.11317|CaO19.3836|IPF4094	Predicted ORF in Assemblies 19, 20 and 21
orf19.3810	1.55659	0.000121991		orf19.11291|IPF23466.1|IPF6938.2|Contig4-2979_0018|orf6.7505|CA4842|CaO19.3810|MTD1|CaO19.11291	Predicted ORF in Assemblies 19, 20 and 21
orf19.1437	1.55649	0.00836625		orf19.9011|orf6.154|IPF19556.1|orf6.1055|CaO19.1437	Transcription is negatively regulated by Sfu1p; removed from Assembly 20
orf19.5641	1.55546	0.0109901	CAR2	orf19.13086|IPF21531.1|IPF12355.2|Contig4-2558_0006|orf6.4510|CaO19.5641|CaO19.13086|CA2561	Alkaline upregulated; mutation confers hypersensitivity to toxic ergosterol analog, and to amphotericin B
orf19.3138	1.55385	0.000455045	NOP1	orf19.10650|IPF24186.1|IPF3267.2|Contig4-3009_0002|orf6.5875|CA3570|CaO19.3138|CaO19.10650	Nucleolar protein; flucytosine induced
orf19.6853	1.55256	0.00119197		orf19.14143|IPF8455.2|IPF8454.2|Contig4-2659_0010|orf6.7002|CA4455|CaO19.14143|CaO19.6853|IPF8454	Predicted ORF in Assemblies 19, 20 and 21
orf19.717	1.55069	0.000567865	HSP60	orf19.8336|orf6.2638|IPF26576.1|IPF14025.2|Contig4-2196_0002|CA1239|CaO19.8336|CaO19.717	Protein described as mitochondrial heat shock protein; soluble protein in hyphae; transcription is regulated by Nrg1p; transcriptionally regulated by iron; expression greater in high iron; heavy metal (cadmium) stress-induced
orf19.1465	1.54612	0.0116876		orf19.9040|IPF25815.1|IPF20018.1|Contig4-3015_0023|Contig4-3015_0024|orf6.7108|CA4538|CaO19.9040|PAA12|CaO19.1465|IPF20018	Predicted ORF in Assemblies 19, 20 and 21
orf19.2214	1.5434	0.0252856		orf19.9759|IPF25143.1|IPF15259.2|Contig4-2359_0006|orf6.4259|CA2377|CaO19.2214|MRPL7|CaO19.9759	Predicted ORF in Assemblies 19, 20 and 21
orf19.3015	1.54261	0.00399867	ARX1	orf19.10533|IPF24288.1|IPF3709.1|Contig4-3096_0039|orf6.7752|CA5051|CaO19.10533|CaO19.3015|IPF3709	Predicted ORF in Assemblies 19, 20 and 21; downregulated during core stress response; decreased expression in response to prostaglandins
orf19.5629	1.53885	0.00953921	QCR7	orf19.13074|IPF21627.1|IPF16775.2|orf6.4788|CA2764|CaO19.5629|CaO19.13074	Protein described as ubiquinol-cytochrome-c reductase, subunit 7
orf19.1872	1.5382	0.0282723		orf19.9428|IPF4045.1|IPF17566.1|Contig4-3010_0010|orf6.283|orf6.7048|CA4490|CaO19.1872|IPF4045	Predicted ORF in Assemblies 19, 20 and 21; repressed by nitric oxide
orf19.2623	1.53342	2.4227e-05	ECM22	orf19.10154|IPF24711.1|IPF12926.2|Contig4-2829_0014|orf6.1414|CA0471|ZCF12|CaO19.10154|CaO19.2623	Putative transcription factor with zinc cluster DNA-binding motif
orf19.5300	1.53329	0.00138976		orf19.12759|IPF18102.2|IPF8537.2|Contig4-2961_0019|Contig4-2961_0020|Contig4-2961_0021|orf6.3934|orf6.8288|CA2157|CNE1|CaO19.5300|IPF8537	Predicted ORF in Assemblies 19, 20 and 21; caspofungin induced
orf19.6090	1.53044	0.0110613		orf19.13509|IPF21063.1|IPF4616.2|Contig4-2998_0012|orf6.6252|CA3862|CaO19.6090|NSR1|CaO19.13509	Predicted ORF in Assemblies 19, 20 and 21; repressed by nitric oxide
orf19.1357	1.52968	0.00355294	FCY21	orf19.8937|FCY22|IPF17673.3|IPF8921.2|IPF17777.2|IPF17779.2|Contig4-1860_0007|Contig4-1860_0009|orf6.1000|orf6.332|CA6188|FCY2|FCY21.3f	High affinity, high capacity, hypoxanthine-adenine-guanine-cytosine/ H+ symporter; purine-cytosine permease of pyrimidine salvage; similar to S. cerevisiae Fcy2p; mutation confers resistance to 5-fluorocytosine (5-FC)
orf19.4669	1.5293	0.00765553	AAT22	orf19.12139|IPF18504.2|IPF7410.2|Contig4-2599_0006|orf6.4067|CA2244|CaO19.4669|CaO19.12139	Protein not essential for viability; similar to S. cerevisiae Aat2p, which is an aspartate aminotransferase involved in nitrogen metabolism; clade-associated gene expression; protein level decreased in stationary phase cultures
orf19.5847	1.529	0.00374985		orf19.13269|IPF21366.1|IPF3777.1|Contig4-2975_0014|orf6.4949|CA2878|CaO19.5847|COP1|CaO19.13269|RET1	Predicted ORF in Assemblies 19, 20 and 21
orf19.3516	1.52849	0.0160382		IPF12568.1|Contig4-2428_0008|CA0805|CaO19.3516|IPF12568|orf6.1949	Predicted ORF in Assemblies 19, 20 and 21
orf19.7534	1.52791	5.62088e-05	MIS12	IPF349.1|Contig4-3048_0003|Contig4-3048_0004|CA5869|CaO19.7534|MIS1|orf6.8786	Predicted ORF in Assemblies 19, 20 and 21
orf19.6561	1.52729	0.0415419	LAT1	orf19.13914|IPF20596.1|IPF1673.1|Contig4-2941_0006|orf6.7549|CA4875|CaJ7.0184|CaJ7_0184|CaO19_6561|CaO19.6561|CaO19.13914	Protein described as dihydrolipoamide acetyltransferase component (E2) of pyruvate dehydrogenase complex
orf19.7222	1.52421	0.00116204	PAM16	IPF864.1|Contig4-3043_0009|orf6.8122|CA5347|CaO19.7222|IPF864	Protein described as similar to maltase; regulated by Gcn4p; repressed in response to amino acid starvation (3-aminotriazole treatment); transcription is upregulated in both intermediate and mature biofilms
orf19.4578	1.52054	0.0331324	CYT2	orf19.12047|orf6.7877|IPF22621.1|IPF1023.2|Contig4-3104_0025|CA5141|CaO19.12047|CaO19.4578	Protein described as cytochrome c1 heme lyase; transcription is regulated by Nrg1p; transcriptionally regulated by iron; expression greater in high iron
orf19.3974	1.51765	0.000560388	PUT2	orf19.11457|IPF23228.1|IPF13622.2|Contig4-3081_0050|orf6.5650|CA3399|CaO19.11457|CaO19.3974	Alkaline upregulated; protein detected by mass spec in exponential and stationary phase cultures
orf19.688	1.51619	0.031846		orf19.8306|IPF26642.1|IPF9582.1|Contig4-2607_0002|orf6.3691|CA1976|CaO19.688|MRPS18|IPF9582	Predicted ORF in Assemblies 19, 20 and 21
orf19.1957	1.51426	0.0296513	CYC3	orf19.9512|orf6.4082|IPF14754.1|IPF13303.1|Contig4-2143_0003|orf6.343|CA2255|CaO19.1957	Cytochrome c heme lyase, mitochondrial; gene also encodes antigenic cell-wall protein; mRNA more abundant in filaments than yeast-form; induced on polystyrene adherence, interaction with macrophage; N-glycosylation, 2 heme-binding motifs
orf19.3704.1	1.51265	7.83567e-05		IPF23568.1|IPF8616.1|Contig4-1425_0003|Contig4-2552_0007|CA0940|IPF8616	ORF Predicted by Annotation Working Group
orf19.4593.1	1.50843	0.00357688		IPF22544.1|IPF995.1|CA5155|IPF995	ORF Predicted by Annotation Working Group
orf19.863	1.50638	0.00505705		orf19.8482|IPF26428.1|IPF7643.1|Contig4-2942_0011|orf6.3551|CA1863|CaO19.863|MRPL35|CaO19.8482	Predicted ORF in Assemblies 19, 20 and 21
orf19.7215.3	1.50531	0.0493659		IPF878.1|Contig4-2519_0001|CA5341|HSP10|HSP10.3	ORF Predicted by Annotation Working Group
orf19.7424	1.50291	0.0159026	NSA2	IPF2441.1|Contig4-2982_0009|Contig4-3080_0023|orf6.8584|CA5719|CaO19.7424|IPF2441	Predicted ORF in Assemblies 19, 20 and 21; decreased expression in response to prostaglandins
orf19.2757	1.50085	0.0136021		orf19.10271|IPF12002.2|IPF29008.1|Contig4-1891_0003|orf6.3589|CA1897|CaO19.2757|CaO19.10271|IPF12002	Predicted ORF in Assemblies 19, 20 and 21
orf19.4093	1.5008	0.029501	NOP7	orf19.11574|IPF23138.1|IPF2093.2|Contig4-3095_0030|orf6.6843|CA4326|PES1|CaO19.11574|CaO19.4093|IPF2093	Pescadillo homolog required for filament-to-yeast switching; mutation confers hypersensitivity to 5-fluorocytosine (5-FC), 5-fluorouracil (5-FU), and tubercidin (7-deazaadenosine)
orf19.1273	1.50019	0.0063766		orf19.8859|IPF10269.1|IPF29523.1|Contig4-2799_0007|orf6.2165|CA0949|CaO19.1273|GIM3|CaO19.8859|IPF10269	Predicted ORF in Assemblies 19, 20 and 21
orf19.3752	0.666657	0.00649442	RAD51	orf19.11236|IPF15096.2|IPF7787.2|Contig4-1795_0004|Contig4-1795_0005|orf6.4214|orf6.615|CA2347|CaO19.3752	Predicted ORF in Assemblies 19, 20 and 21; flucytosine induced; slow growth and increased white-to-opaque switching frequency in null mutant
orf19.6637	0.665859	0.015468		orf19.13958|IPF20518.1|IPF2523.2|Contig4-2856_0009|orf6.6534|CA4081|CaO19.13958|CaO19.6637|IPF2523	Predicted ORF in Assemblies 19, 20 and 21
orf19.3051	0.664735	0.00570578		orf19.10569|IPF24324.1|IPF15301.2|Contig4-3098_0020|orf6.7788|CA5076|CaO19.3051|CaO19.10569|IPF15301	Predicted ORF in Assemblies 19, 20 and 21; shows colony morphology-related gene regulation by Ssn6p
orf19.125	0.663899	0.0129939	EBP1	orf19.7772|Contig4-2900_0026|IPF7044.2|IPF29953.1|orf6.2606|CA1216|CaO19.125	NADPH oxidoreductase; interacts with phenolic substrates, such as 17beta-estradiol; possible role in response to estrogen; induced by oxidative and weak acid stress, nitric oxide, benomyl; activated by Cap1p, Mnl1p; no mammalian homolog
orf19.6707	0.663003	0.00114184		orf19.13975|orf19.13999|IPF17904.3|IPF20482.1|IPF20013.1|Contig4-1469_0004|orf6.6792|orf6.6816|CA4285|CA4307|CaJ7.0401|orf19.6683|CaO19.13999|CaO19.6707|IPF20013	Predicted ORF in Assemblies 19, 20 and 21; transcription is repressed in response to alpha pheromone in SpiderM medium
orf19.5338	0.662897	0.00264579	GAL4	orf19.12798|IPF21869.1|IPF776.1|Contig4-3102_0054|orf6.8327|CA5497|CaO19.5338|CaO19.12798|IPF776	Putative transcription factor with zinc cluster DNA-binding motif; ortholog of S. cerevisiae Gal4p, but is not involved in the regulation of galactose utilization genes; caspofungin repressed
orf19.4263	0.661201	0.0361739		orf19.11739|IPF22980.1|IPF15189.2|orf6.1032|CA0269|CaO19.4263|CaO19.11739|PUF2.5f|PUF2.exon1	Predicted ORF in Assemblies 19, 20 and 21; possibly spurious ORF (Annotation Working Group prediction)
orf19.2614	0.659669	0.000418916	RSR1	orf19.10145|IPF24771.1|IPF8507.2|Contig4-2859_0002|orf6.4271|CA2385|RSR1.3	RAS-related protein; GTP/GDP cycling required for wild-type polar bud site selection, hyphal growth guidance; role in systemic virulence in mouse; geranylgeranylation predicted; suppresses S. cerevisiae cdc24-4 mutant heat sensitivity
orf19.4477	0.659135	0.0270037	CSH1	orf6.4310|IFD4|IPF22774.1|IPF14374.2|CA2416|CAgp38|CaO19.11957|CaO19.4477	Member of aldo-keto reductase family, similar to aryl alcohol dehydrogenases; role in adhesion to fibronectin, cell surface hydrophobicity; regulated by temperature, growth phase, benomyl, macrophage interaction; azole resistance associated
orf19.1995	0.658553	0.0169459		orf19.9547|IPF4742.2|IPF17173.3|Contig4-2500_0005|Contig4-2500_0006|orf6.6364|orf6.767|CA3946|MNN22|CaO19.1995|MNN2	Predicted ORF in Assemblies 19, 20 and 21
orf19.3414	0.654265	0.00136887	SUR7	orf19.10917|IPF12442.1|IPF12038.2|Contig4-2923_0010|orf6.360|CA0055|CaO19.10917|CaO19.3414|IPF12442	Protein required for wild-type cell wall, plasma membrane, cytoskeletal organization, endocytosis; localizes to eisosome subdomains of plasma membrane; four transmembrane motifs; mutant shows ectopic, chitin-rich cell wall
orf19.1715	0.649747	0.0474057	IRO1	orf19.9283|orf6.4843|IPF11363.1|IPF29338.1|Contig4-2578_0004|Contig4-2578_0006|orf6.4845|CA2802|CaO19.9283|CaO19.1715|IPF11363	Putative transcription factor; role in iron utilization, pathogenesis; both IRO1 and adjacent URA3 are mutated in strain CAI4; suppresses S. cerevisiae aft1 mutant low-iron growth defect; hyphal-induced; reports differ about iron regulation
orf19.4763	0.646755	0.0050463		orf19.12227|IPF10916|IPF22471.1|IPF10916.2|orf6.4592|CA2627|CaO19.12227|CaO19.4763	Protein not essential for viability
orf19.7635	0.641387	9.2181e-06	DRS1	IPF603.1|Contig4-3108_0103|orf6.8983|CA6029|CaO19.7635	Predicted ORF in Assemblies 19, 20 and 21; mutation confers hypersensitivity to 5-fluorouracil (5-FU), tubercidin (7-deazaadenosine); transcription is positively regulated by Tbf1p; downregulated during core stress response
orf19.3053	0.64135	0.0209728		orf19.10571|IPF24357.1|IPF15297.1|Contig4-3098_0017|orf6.7790|CA5078|CaO19.10571|CaO19.3053|IPF15297	Predicted ORF in Assemblies 19, 20 and 21; identified in extracts from biofilm and planktonic cells; protein detected by mass spec in exponential and stationary phase cultures
orf19.539	0.640119	0.00534389	LAP3	orf19.8172|orf6.6751|IPF26781.1|IPF4292.2|CA4250|CaO19.8172|CaO19.539|IPF4292	Protein described as an aminopeptidase; transcription is positively regulated by Sfu1p; transcription is repressed in response to alpha pheromone in SpiderM medium; clade-associated gene expression; virulence-group-correlated expression
orf19.4907	0.639807	0.0211652		orf19.12373|IPF22400.1|IPF17283.2|Contig4-2762_0012|orf6.3754|CA2021|CaO19.12373|CaO19.4907|IPF17283	Predicted ORF in Assemblies 19, 20 and 21; increased transcription is observed upon fluphenazine treatment; possibly transcriptionally regulated by Tac1p; induced by nitric oxide; fungal-specific (no human or murine homolog)
orf19.1564	0.63781	0.0122594		orf19.9137|IPF25819.1|IPF7145.2|Contig4-2824_0002|orf6.6421|CA3988|CaO19.9137|CaO19.1564|IPF7145	Predicted ORF in Assemblies 19, 20 and 21
orf19.7323	0.637184	0.00193675	CBP1	CBP|IPF1971.2|orf6.8404|CA5559|CaO19.7323	Corticosteroid binding protein; transcription induced at late log-phase or upon adherence to polystyrene; not induced by corticosterone; contains a possible NAD/FAD binding region; regulated by Nrg1p, Tup1p
orf19.5908	0.6364	0.000263119	TEC1	orf19.13329|IPF21178.1|IPF4351.1|Contig4-3037_0020|orf6.9129|CA6138|CaO19.13329|CaO19.5908|IPF4351	TEA/ATTS transcription factor involved in regulation of hypha-specific genes; required for wild-type biofilm formation; regulates BCR1; directly transcriptionally regulated by Cph2p under some growth conditions; alkaline upregulated
orf19.4567	0.635212	0.000172821		orf19.12036|IPF22616.1|IPF1043.2|Contig4-3104_0008|orf6.3099|CA1543|CaO19.4567|HQD2|CaO19.12036|IPF1043	Catechol 1,2-dioxygenase (1,2-CTD), involved in degradation of aromatic compounds
orf19.1034	0.632445	0.000143314		orf19.8636|IPF18786.2|IPF6156.1|Contig4-2952_0020|orf6.3217|orf6.2323|CA1625|CaO19.1034|IPF6156	Predicted ORF in Assemblies 19, 20 and 21; caspofungin repressed
orf19.6967	0.631776	0.000545427	USO6	IPF11118.1|Contig4-2580_0004|orf6.7713|CA5015|CaO19.6967|IPF11118	Transcription is induced upon filamentous growth
orf19.4077	0.63105	0.0289722	MIT1	orf19.11558|SUR1|IPF2067.2|IPF28522.1|Contig4-2072_0001|Contig4-2072_0002|orf6.3203|CA1619|CaO19.11558|CaO19.4077|IPF2067	Protein involved in sphingolipid biosynthesis; required for mannosylation of inositol phosphoceramide (IPC) to form mannosylated sphingolipids MIPC and M(IP)2C; fluconazole, caspofungin induced; macrophage-downregulated gene
orf19.4664	0.630901	0.0118173		orf19.12134|IPF22668.1|IPF7403.2|Contig4-2819_0011|orf6.4072|orf6.4715|CA2710|CaO19.4664|IPF7403	Predicted ORF in Assemblies 19, 20 and 21
orf19.4459	0.629036	0.00669014		orf19.11939|IPF22769.1|IPF11849.2|Contig4-2719_0006|Contig4-2719_0007|orf6.2833|YNL234W|CA1365|CaO19.4459|CaO19.11939|IPF11849	Predicted ORF in Assemblies 19, 20 and 21; similar to S. cerevisiae Ynl234wp, which is a putative heme-binding stress-related protein; transposon mutation affects filamentous growth
orf19.1840	0.622597	0.0452766		orf19.9889|orf19.9398|IPF25488.1|IPF10840.2|IPF24966.1|IPF13383.2|orf6.4246|orf6.4199|CA6195|CA2336|orf19.2353|CaO19.1840|CaO19.9398|IPF10840.3eoc	Predicted ORF in Assemblies 19, 20 and 21
orf19.7567	0.622584	0.00455759		IPF931.1|Contig4-3105_0044|orf6.8915|CA5973|CaO19.7567|IPF931	Predicted ORF in Assemblies 19, 20 and 21; transcription is induced in response to alpha pheromone in SpiderM medium
orf19.7425	0.621503	0.000805726		IPF2442.1|Contig4-3080_0022|orf6.8585|CA5720|CaO19.7425|UNG1	Predicted ORF in Assemblies 19, 20 and 21
orf19.3475	0.620411	0.00136742		orf19.10979|IPF11725|IPF11725.2|IPF12058.2|Contig4-2835_0016|orf6.432|orf6.4984|CA2903|CaO19.3475	Described as a Gag-related protein; hyphal induced; downregulation correlates with clinical development of fluconazole resistance; repressed by nitric oxide, 17-beta-estradiol, ethynyl estradiol
orf19.5076	0.620208	0.00607836	PFY1	orf19.12542|orf6.6300|IPF22172.1|IPF16724.2|Contig4-1814_0003|CA3897|CaO19.5076|CaO19.12542	Profilin, functional homolog of S. cerevisiae Pfy1p; hyphal-induced; macrophage/pseudohyphal-induced; regulated by Nrg1p, Tup1p; gene lacks intron (unlike S. cerevisiae PFY1); complements growth of S. cerevisiae srv2 mutant; nonessential
orf19.2322.3	0.617348	0.000474453		IPF25016.1|IPF15563.2|Contig4-1946_0001|CA3347|ERP5	ORF Predicted by Annotation Working Group
orf19.3631	0.617005	0.049301		orf19.11114|IPF14232.2|IPF28707.1|Contig4-2417_0005|orf6.2708|orf6.2747|CA1310|CaO19.3631|IPF14232|IPF14232.1	Predicted ORF in Assemblies 19, 20 and 21; possibly spurious ORF (Annotation Working Group prediction)
orf19.4930	0.616627	0.000270543	SPC3	orf19.12396|orf6.5910|IPF22286.1|IPF15621.2|Contig4-2611_0002|CA3600|CaO19.12396|CaO19.4930	Essential protein; similar to S. cerevisiae Spc3p, a component of the signal peptidase complex required for signal peptidase activity; predicted integral ER membrane protein; complements spc3 and suppresses sec61 S. cerevisiae mutants
orf19.4013	0.615505	0.00290868		orf19.11496|IPF23252.1|IPF3352.2|Contig4-3094_0040|orf6.7426|CA4780|CaO19.11496|CaO19.4013|IPF3352	Predicted ORF in Assemblies 19, 20 and 21
orf19.6091	0.61154	0.0426164	RIM8	orf19.13510|PRR1|RIN|IPF21039.1|IPF4622.1|Contig4-2998_0009|orf6.6250|CA3861|CaO19.6091|CaO19.13510	Protein involved in the pH response pathway; required for activation of the transcription factor Rim101p and for alkaline pH-induced hyphal growth; shows colony morphology-related gene regulation by Ssn6p
orf19.3829	0.609819	0.00320594	PHR1	orf19.11310|orf6.7524|IPF23455.1|IPF15932.2|Contig4-2187_0001|Contig4-3060_0001|CA4857|CaO19.3829|CaO19.11310	Glycosidase of cell surface; may act on cell-wall beta-1,3-glucan prior to beta-1,6-glucan linkage; E169 and E270 at active site; role in systemic but not vaginal virulence (neutral, not low pH); high pH or filamentation induced
orf19.801	0.609142	0.0103701	TBF1	orf19.8420|IPF5070.2|IPF19724.1|Contig4-2905_0023|orf6.1354|orf6.2550|CA1182|CaO19.801|IPF19724	Essential transcriptional activator that binds to a conserved sequence at ribosomal protein genes and the rDNA locus; acts with Cbf1p at a subset of promoters; biological role is analogous to that of S. cerevisiae Rap1p, not to S.c. Tbf1p
orf19.3013	0.607228	0.0019691	CDC12	orf19.10531|IPF24312.1|IPF3714.2|Contig4-3096_0035|orf6.7750|CA5049|IPF3714	Septin; essential for viability; gene has predicted splice sites; forms ring at sites of cell division and also forms filaments in mature chlamydospore; filamentous growth induced; regulated by Nrg1p, Tup1p, tyrosol and cell density
orf19.1395	0.605338	0.00265485		orf19.8973|IPF11059.2|IPF7686.2|Contig4-2842_0004|orf6.5348|CA3169|CaO19.8973|CaO19.1395|IPF7686|CA0993|IPF11059|IPF11059.1	Predicted ORF in Assemblies 19, 20 and 21
orf19.6155	0.604011	0.000182826		CDC9|IPF9796.2|Contig4-2784_0016|orf6.5316|CA3145|CaO19.6155	Predicted ORF in Assemblies 19, 20 and 21
orf19.4442	0.603967	0.0216368	ALG9	orf19.11922|IPF22809.1|IPF3098.2|Contig4-2907_0010|orf6.7255|CA4655|CaO19.11922|CaO19.4442|IPF3098	Putative mannosyltransferase; similar to S. cerevisiae Alg9p; has HKEXRF motif
orf19.4776	0.603778	0.000130132		orf19.12240|IPF11774.2|IPF9416.3|Contig4-2888_0010|orf6.1106|orf6.3987|orf6.1105|CA6215|CaO19.4776|IPF9416	Putative transcription factor with zinc cluster DNA-binding motif; has similarity to S. cerevisiae Lys14p, which is a transcription factor involved in the regulation of lysine biosynthesis genes
orf19.4856	0.601848	0.00130505	LIP3	orf19.12319|IPF22432.1|IPF7736.2|Contig4-2920_0010|orf6.7355|CA4731|CaO19.4856|CaO19.12319	Secreted lipase, member of a lipase gene family whose members are expressed differentially in response to carbon source and during infection; may have a role in nutrition and/or in creating an acidic microenvironment
orf19.496	0.59897	0.000268678		orf19.8126|IPF26756.1|IPF8970.1|Contig4-2904_0004|orf6.7075|CA4510|MSH1|CaO19.8126|CaO19.496|IPF8970	Predicted ORF in Assemblies 19, 20 and 21
orf19.4720	0.597798	0.00434407	CTR2	orf19.12183|IPF22485.1|IPF15729.2|Contig4-2780_0006|orf6.3182|CA1600|orf19.72|CaO19.12183|CaO19.4720	Predicted ORF in Assemblies 19, 20 and 21; induced by nitric oxide; clade-associated gene expression
orf19.6586	0.597427	0.00638327		orf19.13939|IPF20613.1|IPF1617.2|Contig4-3066_0026|orf6.7574|CA4894|CaJ7.0158|CaO19.6586|CaJ7_0158|CaO19_6586|CaO19.13939|IPF1617	Predicted ORF in Assemblies 19, 20 and 21; increased transcription is observed upon benomyl treatment or in an azole-resistant strain that overexpresses MDR1; shows colony morphology-related gene regulation by Ssn6p; induced by nitric oxide, 17-beta-estradiol, ethynyl estradiol; macrophage-downregulated gene
orf19.7297	0.595596	0.018395		IPF2837.2|Contig4-2774_0001|Contig4-2774_0012|orf6.8378|CA5536|CaO19.7297|IPF2837	Predicted ORF in Assemblies 19, 20 and 21; Hog1p-induced; Gcn4p-regulated; protein level decreased in stationary phase cultures
orf19.2865	0.595069	0.0375058		orf19.10383|IPF24492.1|IPF18637.1|orf6.3265	Predicted ORF from Assembly 19; merged with orf19.2425 in Assembly 20
orf19.85	0.593711	0.00647292	GPX2	orf19.7730|orf6.1558|GPX1|IPF16333.2|IPF13205.1|GPX3|Contig4-2178_0002|CA0558|GPS1|CaO19.85|CaO19.7730	Similar to glutathione peroxidase; expression greater in high iron; alkaline upregulated by Rim101p; transcriptionally induced by alpha factor or interaction with macrophage; regulated by Efg1p; caspofungin repressed
orf19.5686	0.593445	0.0194432		IPF5460.1|Contig4-2927_0011|orf6.4564|CaO19.5686	Predicted ORF in Assemblies 19, 20 and 21
orf19.2952	0.5934	0.00435465	EXG2	orf19.10469|orf6.6664|IPF24292.1|IPF4419.1|Contig4-2696_0012|Contig4-2696_0013|Contig4-2696_0015|CA4180|CaO19.2952|CaO19.10469	Protein similar to S. cerevisiae Exg2p, which is an exo-1,3-beta-glucosidase; predicted Kex2p substrate; induced during cell wall regeneration
orf19.1097	0.593036	0.0129885	ALS2	orf19.8699|orf19.8700|orf19.9669|orf19.9670|orf6.1311|ALS4|IPF26222.1|IPF26230.1|IPF15450.3|IPF10205.2|IPF25194.1|IPF25217.1|IPF18994.1|IPF16055.3|orf6.3000|orf6.2999|CA1473|CA1471|CA0412|CA0413|orf19.1098|orf19.2121|orf19.2122|ALS12|ALS2.5f	ALS family protein; role in adhesion, biofilm formation, germ tube induction; expressed at infection of human buccal epithelial cells; putative GPI-anchor; induced by ketoconazole, low iron and at cell wall regeneration; regulated by Sfu1p
orf19.5620	0.592687	0.00161523		orf19.13065|IPF18418.1|IPF12436.3|Contig4-2504_0003|orf6.212|orf6.4779|CA2756|PHZ1|CaO19.5620|IPF18418	Predicted ORF in Assemblies 19, 20 and 21; regulated by Gcn4p; induced in response to amino acid starvation (3-aminotriazole treatment); increased transcription is observed upon benomyl treatment or in an azole-resistant strain that overexpresses MDR1
orf19.1862	0.59126	0.00112086		orf19.9418|IPF4065|orf6.1262|IPF18208.2|IPF4065.1|Contig4-2502_0004|CA0386|CaO19.1862	Possible stress protein; increased transcription is associated with CDR1 and CDR2 overexpression or fluphenazine treatment; transcription regulated by Sfu1p, Nrg1p, Tup1p
orf19.4035	0.590929	0.00715145	PGA4	orf19.11518|IPF23247.1|IPF8796.1|Contig4-3094_0009|orf6.7448|CA4800|GAS1|CaO19.4035|CaO19.11518|IPF8796	Cell-surface protein; predicted glycosylphosphatidylinositol (GPI) lipid anchor; similar to S. cerevisiae Gas1p; fungal-specific (no human or murine homolog); transcription is upregulated in RHE model of oral candidiasis
orf19.2210	0.587882	0.000398165		orf19.9755|IPF19934.2|IPF29168.1|Contig4-2359_0002|Contig4-3058_0002|orf6.3574|orf6.4255|CA1882|CaO19.2210|IPF19934|IPF19934.1	Predicted ORF in Assemblies 19, 20 and 21
[truncated: 81 more rows]

## Sheet: mfg1-flo8_30C
Experiment	mfg1-flo8 double mutant yeast 30C
Time	0h
Systematic	Normalized	t-test P-value	Common	Synonyms	Description
[truncated: 93 more rows]

## Sheet: mfg1-flo8_1h37C
Experiment	mfg1-flo8 double mutant hyphae 1h 37C
Time	1h 37C
Systematic	Normalized	t-test P-value	Common	Synonyms	Description
[truncated: 438 more rows]

## Sheet: mfg1-flo8_3h37C
Experiment	mfg1-flo8 double mutant hyphae 3h 37C
[truncated: 138 more rows]

[truncated: 1 more sheets: all genes separate replicates ]
