# Supplementary material for: Functional divergence of a global regulatory complex governing fungal filamentation
Source: PLoS Genet. 2019 Jan 7;15(1):e1007901. doi: 10.1371/journal.pgen.1007901 (PMC6336345; doi:10.1371/journal.pgen.1007901)
Supplement: S3 Table — List of targets bound by Mfg1 or Flo8 and whose expression is altered in the mfg1Δ/mfg1Δ or flo8Δ/flo8Δ mutants respectively. (XLSX) [file pgen.1007901.s014.xlsx]

## Sheet: Mfg1 positively regulated
Genes bound and positively regulated* by Mfg1				*expression was significantly decreased in the mfg1/mfg1 null mutant at the corresponding time point
	Systematic Name	ChIP binding Intensity	Expression from Microarray
0h, 30C
orf19.6816	orf19.6816	-0.946	0.651613
RNR22	orf19.1868	-0.539	0.2138
ADAEC	orf19.868	-0.483	0.590613
ISN1	orf19.3355	-0.448	0.537941
MFG1	orf19.3603	-0.433	0.66216
CDR4	orf19.5079	-0.41	0.512014
1h in serum, 37C
CHS5	orf19.807	-0.402	0.664874
orf19.7445	orf19.7445	-0.494	0.659741
orf19.7166	orf19.7166	-0.472	0.65916
WSC4	orf19.7251	-0.522	0.657351
CBF1	orf19.2876	-0.625	0.646501
MIT1	orf19.4077	-0.481	0.643366
orf19.6348	orf19.6348	-0.584	0.632542
orf19.1785	orf19.1785	-2.057	0.62678
orf19.295	orf19.295	-0.484	0.624368
RSN1	orf19.347	-0.967	0.614989
orf19.2047	orf19.2047	-0.473	0.593776
orf19.2426	orf19.2426	-0.54	0.585459
orf19.5177	orf19.5177	-0.677	0.584511
orf19.94	orf19.94	-0.572	0.582973
DOT5	orf19.5417	-0.434	0.547116
KIS2	orf19.4997	-0.819	0.530752
ROB1	orf19.4998	-0.481	0.486763
orf19.2959.1	orf19.2959.1	-0.79	0.484765
HSP21	orf19.822	-0.952	0.435304
orf19.1862	orf19.1862	-0.591	0.382331
DDR48	orf19.4082	-0.401	0.333589
orf19.2048	orf19.2048	-0.473	0.269655
3h in serum, 37C
orf19.6637	orf19.6637	-0.443	0.665859
orf19.4263	orf19.4263	-0.414	0.661201
SUR7	orf19.3414	-0.63	0.654265
orf19.4907	orf19.4907	-0.86	0.639807
CBP1	orf19.7323	-0.616	0.637184
TEC1	orf19.5908	-0.664	0.6364
MIT1	orf19.4077	-0.417	0.63105
orf19.3475	orf19.3475	-0.594	0.620411
CTR2	orf19.4720	-0.515	0.597798
orf19.6586	orf19.6586	-0.711	0.597427
orf19.1862	orf19.1862	-0.43	0.59126
orf19.7341	orf19.7341	-0.438	0.573413
XYL2	orf19.7676	-0.448	0.571989
YKE2	orf19.6601.1	-0.691	0.555453
orf19.409	orf19.409	-0.515	0.548848
HSP104	orf19.6387	-0.648	0.539712
orf19.7085	orf19.7085	-1.112	0.537519
ERG5	orf19.5178	-0.426	0.53632
orf19.1152	orf19.1152	-0.507	0.531505
orf19.4409	orf19.4409	-0.491	0.529767
orf19.2296	orf19.2296	-0.529	0.521043
orf19.2959.1	orf19.2959.1	-0.588	0.503429
HSP21	orf19.822	-0.769	0.474275
GPH1	orf19.7021	-0.935	0.45466
CRZ2	orf19.2356	-0.514	0.448787
GLK1	orf19.734	-0.761	0.414268
GLK4	orf19.6116	-0.945	0.403029
MNN1	orf19.4279	-0.616	0.38129
orf19.675	orf19.675	-0.612	0.378275
ADH5	orf19.2608	-0.979	0.362355
IHD1	orf19.5760	-0.689	0.0966184

## Sheet: Flo8 positively regulated
Genes bound and positively regulated* by Flo8				*expression was significantly decreased in the flo8/flo8 null mutant at the corresponding time point
	Systematic Name	ChIP binding Intensity	Expression from Microarray
0h, 30C
FET34	orf19.4215	-1.041	0.664873
orf19.1189	orf19.1189	-0.439	0.650652
NRG1	orf19.7150	-2.694	0.631043
orf19.3156	orf19.3156	-0.608	0.59034
DEF1	orf19.7561	-2.48	0.542913
CTA4	orf19.7374	-0.844	0.492939
ALS4	orf19.4555	-0.803	0.459866
BMT6	orf19.5602	-0.479	0.453214
BMT4	orf19.5612	-0.611	0.429561
orf19.6983	orf19.6983	-0.919	0.403336
RCT1	orf19.7350	-0.46	0.383208
ADAEC	orf19.868	-1.694	0.31614
YWP1	orf19.3618	-1.462	0.0777663
1h in serum, 37C
SEC22	orf19.479.2	-0.486	0.625475
orf19.7043	orf19.7043	-0.741	0.613839
orf19.1301	orf19.1301	-0.648	0.602274
orf19.6630	orf19.6630	-0.523	0.597561
HSP21	orf19.822	-1.309	0.543606
GPD1	orf19.1756	-0.635	0.510092
SCS7	orf19.3822	-0.52	0.36112
FET34	orf19.4215	-0.745	0.136548
3h in serum, 37C
GCN4	orf19.1358	-0.59	0.657727
TOS1	orf19.1690	-0.818	0.652541
orf19.7085	orf19.7085	-1.189	0.650401
DOG1	orf19.3392	-0.557	0.650082
orf19.5576	orf19.5576	-0.485	0.646147
orf19.3984	orf19.3984	-0.749	0.644224
GRP2	orf19.4309	-0.876	0.63722
SUI1	orf19.1280	-0.657	0.634809
GDB1	orf19.744	-0.539	0.632506
orf19.1486	orf19.1486	-1.165	0.631896
ROB1	orf19.4998	-0.91	0.629587
ZCF27	orf19.4649	-0.451	0.611782
orf19.3352	orf19.3352	-0.91	0.601677
orf19.1536	orf19.1536	-0.48	0.600135
orf19.7341	orf19.7341	-0.708	0.597728
SFU1	orf19.4869	-0.865	0.596674
ERG25	orf19.3732	-0.534	0.594572
ERG5	orf19.5178	-0.504	0.594352
MIT1	orf19.4077	-0.482	0.57973
orf19.3475	orf19.3475	-0.86	0.567799
orf19.2296	orf19.2296	-0.73	0.562682
PHM7	orf19.2170	-1.097	0.555979
ERG6	orf19.1631	-0.413	0.553124
orf19.6079	orf19.6079	-0.47	0.546396
SUR7	orf19.3414	-1.198	0.537259
orf19.7152	orf19.7152	-0.825	0.519
orf19.4907	orf19.4907	-1.1	0.505453
CTA4	orf19.7374	-0.573	0.495302
CYS3	orf19.6402	-0.739	0.487294
SCS7	orf19.3822	-0.761	0.477457
HSP70	orf19.4980	-0.952	0.468598
ADAEC	orf19.868	-0.741	0.462348
orf19.3869	orf19.3869	-0.705	0.450721
GPH1	orf19.7021	-1.083	0.443609
MNN1	orf19.4279	-0.66	0.361002
AAT21	orf19.6287	-0.456	0.323309
RCT1	orf19.7350	-0.429	0.284472
DDR48	orf19.4082	-0.529	0.261231
GAC1	orf19.7053	-2.055	0.177863
FET34	orf19.4215	-0.547	0.0788688
IHD1	orf19.5760	-0.808	0.0665949

## Sheet: Mfg1 negatively regulated
Genes bound and negatively regulated* by Mfg1				*expression was significantly increased in the mfg1/mfg1 null mutant at the corresponding time point
	Systematic Name	ChIP binding Intensity	Expression from Microarray
0h, 30C
orf19.4167	orf19.4167	-0.759	1.96288
CUP9	orf19.6514	-0.685	1.69612
HAP41	orf19.740	-0.633	3.80365
RRN3	orf19.1923	-0.44	2.12556
orf19.2920	orf19.2920	-0.43	1.58563
1h in serum, 37C
HAP41	orf19.740	-1.946	3.55735
TSR1	orf19.6417	-0.626	2.96298
SAS10	orf19.2717	-0.418	2.95595
CWH8	orf19.3682	-0.411	2.91154
RAT1	orf19.4681	-0.518	2.67731
GDH3	orf19.4716	-0.564	2.60954
PGA38	orf19.2758	-0.565	2.24591
CAN2	orf19.111	-0.664	2.23192
PHO4	orf19.1253	-0.515	2.21704
EFG1	orf19.610	-0.547	2.16343
HNM1	orf19.2003	-0.864	2.07587
orf19.4657	orf19.4657	-1.554	2.01287
AAT22	orf19.4669	-0.483	1.99753
GPR1	orf19.1944	-0.438	1.96229
POP3	orf19.7657	-0.403	1.94288
YOX1	orf19.7017	-0.428	1.8241
orf19.6818	orf19.6818	-0.475	1.7836
orf19.3089	orf19.3089	-0.445	1.66626
CNT	orf19.4118	-0.591	1.66054
LYS4	orf19.3846	-0.445	1.6546
HRQ2	orf19.5037	-0.604	1.64845
SUT1	orf19.4342	-0.611	1.61191
CUP9	orf19.6514	-0.554	1.59719
ECM22	orf19.2623	-0.596	1.5962
RPA135	orf19.7062	-0.515	1.56543
BRE1	orf19.976	-0.497	1.55826
MLP1	orf19.4683	-0.693	1.54244
LYS1	orf19.1789.1	-0.738	1.53952
3h in serum, 37C
PHO84	orf19.655	-0.459	8.78366
RHD1	orf19.54	-0.53	5.51912
PCK1	orf19.7514	-0.446	4.08713
orf19.670.2	orf19.670.2	-1.599	3.21181
PIR1	orf19.220	-0.607	2.687
GUT2	orf19.3133	-0.462	2.43354
PTC8	orf19.4698	-0.531	2.42877
ACO1	orf19.6385	-0.476	2.33896
CIT1	orf19.4393	-1.144	2.23722
MIR1	orf19.4885	-0.612	2.19987
orf19.93	orf19.93	-0.587	2.02338
CAN2	orf19.111	-0.703	1.87206
SSC1	orf19.1896	-0.492	1.86781
YNK1	orf19.4311	-0.815	1.81188
GAL7	orf19.3675	-1.327	1.75202
IDP2	orf19.3733	-0.855	1.74068
KGD2	orf19.6126	-0.564	1.70039
orf19.7042	orf19.7042	-0.425	1.69273
KGD1	orf19.6165	-0.836	1.68125
CYC1	orf19.1770	-1.313	1.6598
orf19.1277	orf19.1277	-0.57	1.65476
GAL1	orf19.3670	-1.688	1.64857
MIG1	orf19.4318	-0.413	1.58566
HSP60	orf19.717	-0.519	1.55069
FCY21	orf19.1357	-0.8	1.52968
AAT22	orf19.4669	-0.464	1.5293

## Sheet: Flo8 negatively regulated
Genes bound and negatively regulated* by Flo8				*expression was significantly increased in the flo8/flo8 null mutant at the corresponding time point
	Systematic Name	ChIP binding Intensity	Expression from Microarray
0h, 30C
orf19.3897	orf19.3897	-0.418	5.02606
ZCF31	orf19.5924	-0.698	1.86218
CIT1	orf19.4393	-0.424	1.6169
OPT1	orf19.2602	-0.582	1.50321
1h in serum, 37C
FET31	orf19.4211	-0.42	9.59145
URA2	orf19.2360	-0.645	2.16819
EFG1	orf19.610	-0.437	2.00383
orf19.4479	orf19.4479	-0.402	1.99014
orf19.4167	orf19.4167	-0.474	1.79573
orf19.7223	orf19.7223	-0.42	1.73977
SUV3	orf19.4519	-0.541	1.66011
RFG1	orf19.2823	-2.102	1.60629
VTC3	orf19.4381	-0.495	1.58006
LRG1	orf19.7489	-0.415	1.55355
3h in serum, 37C
RHD1	orf19.54	-0.754	5.60505
ALD5	orf19.5806	-0.51	2.54594
RBT5	orf19.5636	-0.893	2.5347
PIR1	orf19.220	-0.584	2.3938
GSY1	orf19.3278	-0.478	2.0074
MIG1	orf19.4318	-0.595	1.98159
CYC1	orf19.1770	-1.15	1.7615
orf19.913.2	orf19.913.2	-0.943	1.75799
orf19.53	orf19.53	-0.754	1.75518
SOD6	orf19.2108	-1.698	1.67049
MDH1	orf19.7481	-0.727	1.64381
PDX1	orf19.5021	-0.451	1.63409
RKI1	orf19.1701	-0.559	1.61001
TUF1	orf19.6047	-0.44	1.60888
HSP60	orf19.717	-0.467	1.60445
MAF1	orf19.2173	-0.692	1.59403
ECM21	orf19.4887	-1.101	1.56267
FBP1	orf19.6178	-0.401	1.54579
TPO3	orf19.4737	-0.627	1.52827
PTR22	orf19.6937	-0.625	1.51513
