# Supplementary material for: Functional divergence of a global regulatory complex governing fungal filamentation
Source: PLoS Genet. 2019 Jan 7;15(1):e1007901. doi: 10.1371/journal.pgen.1007901 (PMC6336345; doi:10.1371/journal.pgen.1007901)
Supplement: S4 Table — MassIVE Table 1: Sample description table. Baits are Mfg1-GFP grown in YPD at 30°C (MFG1_untreat), or in the presence of 10% serum at 37°C for 1 hour (MFG1_1) or for 3 hours (MFG1_3). Eno1-GFP was used as the negative control, grown in the same conditions. MassIVE Table 2: Protein identification evidence. MassIVE Table 3: MassIVE SAINTexpress v.3.6.1 output. Prey Accession is the NCBI protein accession number; Prey Gene is as per NCBI Entrez Gene. Spectral counts for the prey (column D, separated by "I" delimiter; column E, summed, column F, averaged), number of replicates performed (column G), spectral counts for the prey across all negative controls (column H), Averaged probability across replicates (column I), maximal probability (column J), log Odds score (column K), Fold Change (counts in the purification divided by counts in the controls plus small factor to prevent division by 0; column L) and Bayesian FDR (column M) are listed for each bait-prey relationship and are directly from the SAINTexpress output. Columns N-P are the unique prey peptides as calculated through ProHits. Column Q is the prey protein length and column R is the UniProt accession number. The values for Mfg1, Flo8, and Mss11 are highlighted in yellow. (XLS) [file pgen.1007901.s015.xls]

## Sheet: MassIVE_Table1
Sample report
SearchEngine: TPP iProphet
Project name: Gingras_yeast_TAP
Created by: Anne-Claude Gingras
Creation date: 2018-12-07
MassIVE Table 1: Sample description table (Elizabeth J. Polvi/AP-MS of Mfg1-GFP cells) Contains files associated with the "AP-MS of Mfg1-GFP cells in untreated conditions, or in presence of serum at 37°C for 1 hour or 3 hours".
FLAG dataset on instrument AB SCIEX 5600 TripleTOF™ (SAINTexpress task 3869). "Bait Name" contains the gene name and the type and location of the epitope tag. "Bait Fwnw" is the Official Symbol (retrieved from NCBI); "Bait Gene ID" is the official entry from NCBI Gene. "Bait ID", "Experiment ID", "Sample ID", “Sample Name” and "Raw File Name" are from the Lunenfeld-Tanenbaum implementation of Pro…
Bait Name	Bait Gene	Bait Gene ID	Bait Accession	Bait ID	Experiment ID	Sample ID	Sample Name	Raw File Name	Instrument
MFG1_3 (N-GFP)	MFG1	3643884	XP_714447.2	4738	6281	30898	MFG1_3_BR2_IDA_TOF3_P50	30898_MFG1_3_BR2_IDA_TOF3_P50.wiff	TRIPLETOF3:67412;TRIPLETOF3:67431;TRIPLETOF3:67432;TRIPLETOF3:67433
MFG1_3 (N-GFP)	MFG1	3643884	XP_714447.2	4738	6280	30890	MFG1_3_BR1_IDA_TOF3_P50	30890_MFG1_3_BR1_IDA_TOF3_P50_Wrong.wiff	TRIPLETOF3:67286;TRIPLETOF3:67408;TRIPLETOF3:67428;TRIPLETOF3:67429;TRIPLETOF3:67430
MFG1_1 (N-GFP)	MFG1	3643884	XP_714447.2	4737	6279	30902	MFG1_1_BR2_IDA_TOF3_P50	30902_MFG1_1_BR2_IDA_TOF3_P50.wiff	TRIPLETOF3:67440;TRIPLETOF3:67449;TRIPLETOF3:67450;TRIPLETOF3:67451
MFG1_1 (N-GFP)	MFG1	3643884	XP_714447.2	4737	6278	30881	MFG1_1_BR1_IDA_TOF3_P50	30881_MFG1_1_BR1_IDA_TOF3_P50.wiff	TRIPLETOF3:67278;TRIPLETOF3:67364;TRIPLETOF3:67365;TRIPLETOF3:67366
MFG1_untreat (N-GFP)	MFG1	3643884	XP_714447.2	4736	6276	30877	MFG1_untreat_BR1_IDA_TOF3_P50	30877_MFG1_untreat_BR1_IDA_TOF3_P50.wiff	TRIPLETOF3:67270;TRIPLETOF3:67358;TRIPLETOF3:67359;TRIPLETOF3:67360
MFG1_untreat (N-GFP)	MFG1	3643884	XP_714447.2	4736	6277	30894	MFG1_untreat_BR2_IDA_TOF3_P50	30894_MFG1_untreat_BR2_IDA_TOF3_P50.wiff	TRIPLETOF3:67374;TRIPLETOF3:67399;TRIPLETOF3:67400;TRIPLETOF3:67401
ENO1_3 (N-GFP)	ENO1	3646493	XP_711883.1	4735	6275	30896	ENO1_3_BR2_IDA_TOF3_P50	30896_ENO1_3_BR2_IDA_TOF3_P50.wiff	TRIPLETOF3:67378;TRIPLETOF3:67402;TRIPLETOF3:67403;TRIPLETOF3:67404
ENO1_3 (N-GFP)	ENO1	3646493	XP_711883.1	4735	6274	30883	ENO1_3_BR1_IDA_TOF3_P50	30883_ENO1_3_BR1_IDA_TOF3_P50.wiff	TRIPLETOF3:67282;TRIPLETOF3:67367;TRIPLETOF3:67368;TRIPLETOF3:67369
ENO1_1 (N-GFP)	ENO1	3646493	XP_711883.1	4734	6273	30900	ENO1_1_BR2_IDA_TOF3_P50	30900_ENO1_1_BR2_IDA_TOF3_P50.wiff	TRIPLETOF3:67436;TRIPLETOF3:67446;TRIPLETOF3:67447;TRIPLETOF3:67448
ENO1_1 (N-GFP)	ENO1	3646493	XP_711883.1	4734	6272	30879	ENO1_1_BR1_IDA_TOF3_P50	30879_ENO1_1_BR1_IDA_TOF3_P50.wiff	TRIPLETOF3:67274;TRIPLETOF3:67361;TRIPLETOF3:67362;TRIPLETOF3:67363
ENO1_untreat (N-GFP)	ENO1	3646493	XP_711883.1	4733	6270	30875	ENO1_untreat_BR1_IDA_TOF3_P50	30875_ENO1_untreat_BR1_IDA_TOF3_P50.wiff	TRIPLETOF3:67266;TRIPLETOF3:67355;TRIPLETOF3:67356;TRIPLETOF3:67357
ENO1_untreat (N-GFP)	ENO1	3646493	XP_711883.1	4733	6271	30892	ENO1_untreat_BR2_IDA_TOF3_P50	30892_ENO1_untreat_BR2_IDA_TOF3_P50.wiff	TRIPLETOF3:67370;TRIPLETOF3:67396;TRIPLETOF3:67397;TRIPLETOF3:67398

## Sheet: MassIVE_Table2
Sample report
SearchEngine: TPP iProphet
Project name: Gingras_yeast_TAP
Created by: Anne-Claude Gingras
Creation date: 2018-12-07
<Filters>:
TPP Probability < 0.95
Uniqe Peptide < 2
min_XPRESS=
max_XPRESS=
</Filters>
MassIVE Table 2: Protein identification evidence (Elizabeth J. Polvi/AP-MS of Mfg1-GFP cells). Contains data associated with the "AP-MS of Mfg1-GFP cells in untreated conditions, or in presence of serum at 37°C for 1 hour or 3 hours".
FLAG dataset on instrument AB SCIEX 5600 TripleTOF™ (SAINTexpress task 3869).Complete evidence for peptide identification in the mass spectrometry data. Samples were analyzed by mass spectrometry as detailed in the manuscript, and searched with the iProphet pipeline using Mascot and Comet search engines. “Bait Name” contains the gene name and the type and location of the epitope tag. "Bait Gene" …
Bait Name	Bait Gene	Bait Gene ID	Bait Accession	Bait ID	Experiment ID	Sample ID	Sample Name	Raw File Name	Prey Gene Name	Prey Gene ID	Prey Accession	Protein Probability	Redundant Acc	Spectral Counts	Unique Peptides	% Spectrum IDs	Prey Coverage	Project Frequency	Prey Length
MFG1_3 (N-GFP)	MFG1	3643884	XP_714447.2	4738	6281	30898	MFG1_3_BR2_IDA_TOF3_P50	30898_MFG1_3_BR2_IDA_TOF3_P50.wiff			ENSEMBL:ENSBTAP00000016046	1		3	2	0.05	3.1	1	706
MFG1_3 (N-GFP)	MFG1	3643884	XP_714447.2	4738	6281	30898	MFG1_3_BR2_IDA_TOF3_P50	30898_MFG1_3_BR2_IDA_TOF3_P50.wiff			ENSEMBL:ENSBTAP00000018574	1		8	7	0.12	14.7	1	496
MFG1_3 (N-GFP)	MFG1	3643884	XP_714447.2	4738	6281	30898	MFG1_3_BR2_IDA_TOF3_P50	30898_MFG1_3_BR2_IDA_TOF3_P50.wiff			ENSEMBL:ENSBTAP00000024146	1		55	30	0.83	24.8	1	1477
MFG1_3 (N-GFP)	MFG1	3643884	XP_714447.2	4738	6281	30898	MFG1_3_BR2_IDA_TOF3_P50	30898_MFG1_3_BR2_IDA_TOF3_P50.wiff			ENSEMBL:ENSBTAP00000024462	1	ENSEMBL:ENSBTAP00000024466	2	2	0.03	7	1	419
MFG1_3 (N-GFP)	MFG1	3643884	XP_714447.2	4738	6281	30898	MFG1_3_BR2_IDA_TOF3_P50	30898_MFG1_3_BR2_IDA_TOF3_P50.wiff			ENSEMBL:ENSBTAP00000032840	1		11	10	0.16	14.5	1	825
MFG1_3 (N-GFP)	MFG1	3643884	XP_714447.2	4738	6281	30898	MFG1_3_BR2_IDA_TOF3_P50	30898_MFG1_3_BR2_IDA_TOF3_P50.wiff			P00761	1	TRYP_PIG	15	4	0.23	25.1	1	231
MFG1_3 (N-GFP)	MFG1	3643884	XP_714447.2	4738	6281	30898	MFG1_3_BR2_IDA_TOF3_P50	30898_MFG1_3_BR2_IDA_TOF3_P50.wiff	PLG	280897	P06868	1		4	2	0.04	5.5		812
MFG1_3 (N-GFP)	MFG1	3643884	XP_714447.2	4738	6281	30898	MFG1_3_BR2_IDA_TOF3_P50	30898_MFG1_3_BR2_IDA_TOF3_P50.wiff	AHSG	280988	P12763	1		4	2	0.06	7.2		359
MFG1_3 (N-GFP)	MFG1	3643884	XP_714447.2	4738	6281	30898	MFG1_3_BR2_IDA_TOF3_P50	30898_MFG1_3_BR2_IDA_TOF3_P50.wiff	APOA1	281631	P15497	1		24	14	0.37	52.1		265
MFG1_3 (N-GFP)	MFG1	3643884	XP_714447.2	4738	6281	30898	MFG1_3_BR2_IDA_TOF3_P50	30898_MFG1_3_BR2_IDA_TOF3_P50.wiff	SERPINA1	280699	P34955	1		6	5	0.09	12.7		416
MFG1_3 (N-GFP)	MFG1	3643884	XP_714447.2	4738	6281	30898	MFG1_3_BR2_IDA_TOF3_P50	30898_MFG1_3_BR2_IDA_TOF3_P50.wiff			Q1RMK2	1		5	4	0.07	9.2	1	597
MFG1_3 (N-GFP)	MFG1	3643884	XP_714447.2	4738	6281	30898	MFG1_3_BR2_IDA_TOF3_P50	30898_MFG1_3_BR2_IDA_TOF3_P50.wiff	CFH	280816	Q28085	1		19	9	0.28	7.3		1236
MFG1_3 (N-GFP)	MFG1	3643884	XP_714447.2	4738	6281	30898	MFG1_3_BR2_IDA_TOF3_P50	30898_MFG1_3_BR2_IDA_TOF3_P50.wiff	THBS1	281530	Q28194	1		2	2	0.03	2		1170
MFG1_3 (N-GFP)	MFG1	3643884	XP_714447.2	4738	6281	30898	MFG1_3_BR2_IDA_TOF3_P50	30898_MFG1_3_BR2_IDA_TOF3_P50.wiff	C7	507339	Q29RQ1	1		5	5	0.08	8.4		843
MFG1_3 (N-GFP)	MFG1	3643884	XP_714447.2	4738	6281	30898	MFG1_3_BR2_IDA_TOF3_P50	30898_MFG1_3_BR2_IDA_TOF3_P50.wiff	C3	280677	Q2UVX4	1		33	21	0.48	14.5		1662
MFG1_3 (N-GFP)	MFG1	3643884	XP_714447.2	4738	6281	30898	MFG1_3_BR2_IDA_TOF3_P50	30898_MFG1_3_BR2_IDA_TOF3_P50.wiff	APOA4	537301	Q32PJ2	1		7	6	0.11	20.3		380
MFG1_3 (N-GFP)	MFG1	3643884	XP_714447.2	4738	6281	30898	MFG1_3_BR2_IDA_TOF3_P50	30898_MFG1_3_BR2_IDA_TOF3_P50.wiff	CFB	514076	Q3KUS7	1		4	2	0.04	4.2		760
MFG1_3 (N-GFP)	MFG1	3643884	XP_714447.2	4738	6281	30898	MFG1_3_BR2_IDA_TOF3_P50	30898_MFG1_3_BR2_IDA_TOF3_P50.wiff	C9	526766	Q3MHN2	1		8	7	0.12	13.5		548
MFG1_3 (N-GFP)	MFG1	3643884	XP_714447.2	4738	6281	30898	MFG1_3_BR2_IDA_TOF3_P50	30898_MFG1_3_BR2_IDA_TOF3_P50.wiff	GSN	535077	Q3SX14	1	GELS_HUMAN	3	3	0.05	5.2		781
MFG1_3 (N-GFP)	MFG1	3643884	XP_714447.2	4738	6281	30898	MFG1_3_BR2_IDA_TOF3_P50	30898_MFG1_3_BR2_IDA_TOF3_P50.wiff	AGT	527114	Q3SZH5	1		3	3	0.05	9		424
MFG1_3 (N-GFP)	MFG1	3643884	XP_714447.2	4738	6281	30898	MFG1_3_BR2_IDA_TOF3_P50	30898_MFG1_3_BR2_IDA_TOF3_P50.wiff	ITIH4	513700	Q3T052	1		9	9	0.14	10		916
MFG1_3 (N-GFP)	MFG1	3643884	XP_714447.2	4738	6281	30898	MFG1_3_BR2_IDA_TOF3_P50	30898_MFG1_3_BR2_IDA_TOF3_P50.wiff	VTN	507525	Q3ZBS7	1		3	3	0.05	7.2		484
MFG1_3 (N-GFP)	MFG1	3643884	XP_714447.2	4738	6281	30898	MFG1_3_BR2_IDA_TOF3_P50	30898_MFG1_3_BR2_IDA_TOF3_P50.wiff	CAALFM_CR06060WA	6335358	XP_441044	1	XP_713526.1	5	3	0.08	15.2		257
MFG1_3 (N-GFP)	MFG1	3643884	XP_714447.2	4738	6281	30898	MFG1_3_BR2_IDA_TOF3_P50	30898_MFG1_3_BR2_IDA_TOF3_P50.wiff	MSS116	3634792	XP_723426	1	XP_723235.1	7	7	0.11	13.9		668
MFG1_3 (N-GFP)	MFG1	3643884	XP_714447.2	4738	6281	30898	MFG1_3_BR2_IDA_TOF3_P50	30898_MFG1_3_BR2_IDA_TOF3_P50.wiff	COX5	3634768	XP_723445	1	XP_723256.1	2	2	0.03	14.5		165
MFG1_3 (N-GFP)	MFG1	3643884	XP_714447.2	4738	6281	30898	MFG1_3_BR2_IDA_TOF3_P50	30898_MFG1_3_BR2_IDA_TOF3_P50.wiff	YTM1	3634765	XP_723501	1	XP_723311.1	4	4	0.06	13.1		466
MFG1_3 (N-GFP)	MFG1	3643884	XP_714447.2	4738	6281	30898	MFG1_3_BR2_IDA_TOF3_P50	30898_MFG1_3_BR2_IDA_TOF3_P50.wiff	IDH1	3634893	XP_723512	1	XP_723322.1	4	3	0.06	20.7		193
MFG1_3 (N-GFP)	MFG1	3643884	XP_714447.2	4738	6281	30898	MFG1_3_BR2_IDA_TOF3_P50	30898_MFG1_3_BR2_IDA_TOF3_P50.wiff	CAALFM_C109790CA	3634843	XP_723530	1	XP_723340.1	4	4	0.06	13.6		381
MFG1_3 (N-GFP)	MFG1	3643884	XP_714447.2	4738	6281	30898	MFG1_3_BR2_IDA_TOF3_P50	30898_MFG1_3_BR2_IDA_TOF3_P50.wiff	MIR1	3634782	XP_723568	1	XP_723379.1	12	8	0.17	34.5		307
MFG1_3 (N-GFP)	MFG1	3643884	XP_714447.2	4738	6281	30898	MFG1_3_BR2_IDA_TOF3_P50	30898_MFG1_3_BR2_IDA_TOF3_P50.wiff	CAALFM_C110190WA	3634785	XP_723571	1	XP_723383.1	10	4	0.15	21.3		277
MFG1_3 (N-GFP)	MFG1	3643884	XP_714447.2	4738	6281	30898	MFG1_3_BR2_IDA_TOF3_P50	30898_MFG1_3_BR2_IDA_TOF3_P50.wiff	RPA34	3634883	XP_723578	1	XP_723390.1	3	2	0.05	10.4		240
MFG1_3 (N-GFP)	MFG1	3643884	XP_714447.2	4738	6281	30898	MFG1_3_BR2_IDA_TOF3_P50	30898_MFG1_3_BR2_IDA_TOF3_P50.wiff	SBP1	3635280	XP_723070	1	XP_722924.1	3	3	0.05	9.6		282
MFG1_3 (N-GFP)	MFG1	3643884	XP_714447.2	4738	6281	30898	MFG1_3_BR2_IDA_TOF3_P50	30898_MFG1_3_BR2_IDA_TOF3_P50.wiff	CAALFM_C304370CA	3635172	XP_723100	1	XP_722953.1	10	9	0.14	8.3		1120
MFG1_3 (N-GFP)	MFG1	3643884	XP_714447.2	4738	6281	30898	MFG1_3_BR2_IDA_TOF3_P50	30898_MFG1_3_BR2_IDA_TOF3_P50.wiff	CAALFM_C304380CA	3635173	XP_723101	1	XP_722954.1	9	4	0.14	38.9		126
MFG1_3 (N-GFP)	MFG1	3643884	XP_714447.2	4738	6281	30898	MFG1_3_BR2_IDA_TOF3_P50	30898_MFG1_3_BR2_IDA_TOF3_P50.wiff	RPL19A	3635257	XP_723118	1	XP_722971.1	7	3	0.11	23.5		115
MFG1_3 (N-GFP)	MFG1	3643884	XP_714447.2	4738	6281	30898	MFG1_3_BR2_IDA_TOF3_P50	30898_MFG1_3_BR2_IDA_TOF3_P50.wiff	MAK21	3635147	XP_723125	1	XP_722978.1	3	3	0.05	3.6		1066
MFG1_3 (N-GFP)	MFG1	3643884	XP_714447.2	4738	6281	30898	MFG1_3_BR2_IDA_TOF3_P50	30898_MFG1_3_BR2_IDA_TOF3_P50.wiff	ZCF31	3635191	XP_723136	1	XP_722989.1	26	22	0.4	25.5		1130
MFG1_3 (N-GFP)	MFG1	3643884	XP_714447.2	4738	6281	30898	MFG1_3_BR2_IDA_TOF3_P50	30898_MFG1_3_BR2_IDA_TOF3_P50.wiff	RPS15	3635194	XP_723139	1	XP_722992.1	6	2	0.09	27.8		115
MFG1_3 (N-GFP)	MFG1	3643884	XP_714447.2	4738	6281	30898	MFG1_3_BR2_IDA_TOF3_P50	30898_MFG1_3_BR2_IDA_TOF3_P50.wiff	FAS2	3635223	XP_723162	1	XP_723015.1	5	5	0.08	7.1		804
MFG1_3 (N-GFP)	MFG1	3643884	XP_714447.2	4738	6281	30898	MFG1_3_BR2_IDA_TOF3_P50	30898_MFG1_3_BR2_IDA_TOF3_P50.wiff	NOP14	3635266	XP_723170	1	XP_723023.1	3	3	0.04	3.7		842
MFG1_3 (N-GFP)	MFG1	3643884	XP_714447.2	4738	6281	30898	MFG1_3_BR2_IDA_TOF3_P50	30898_MFG1_3_BR2_IDA_TOF3_P50.wiff	RPL18	3635156	XP_723193	1	XP_723046.1	19	4	0.29	29.2		154
MFG1_3 (N-GFP)	MFG1	3643884	XP_714447.2	4738	6281	30898	MFG1_3_BR2_IDA_TOF3_P50	30898_MFG1_3_BR2_IDA_TOF3_P50.wiff	CAALFM_C305150WA	3635162	XP_723199	1	XP_723052.1	5	2	0.08	5.5		475
MFG1_3 (N-GFP)	MFG1	3643884	XP_714447.2	4738	6281	30898	MFG1_3_BR2_IDA_TOF3_P50	30898_MFG1_3_BR2_IDA_TOF3_P50.wiff	CAALFM_C305160CA	3635229	XP_723201	1	XP_723054.1	7	7	0.11	8.6		908
MFG1_3 (N-GFP)	MFG1	3643884	XP_714447.2	4738	6281	30898	MFG1_3_BR2_IDA_TOF3_P50	30898_MFG1_3_BR2_IDA_TOF3_P50.wiff	RPL8B	3635198	XP_723211	1	XP_723064.1	47	15	0.37	55.7		262
MFG1_3 (N-GFP)	MFG1	3643884	XP_714447.2	4738	6281	30898	MFG1_3_BR2_IDA_TOF3_P50	30898_MFG1_3_BR2_IDA_TOF3_P50.wiff	BFR1	3635540	XP_722778	1	XP_722633.1	9	9	0.13	22.9		462
MFG1_3 (N-GFP)	MFG1	3643884	XP_714447.2	4738	6281	30898	MFG1_3_BR2_IDA_TOF3_P50	30898_MFG1_3_BR2_IDA_TOF3_P50.wiff	CaO19.12032	3635543	XP_722781	1	XP_722636.1	11	7	0.15	25.9		371
MFG1_3 (N-GFP)	MFG1	3643884	XP_714447.2	4738	6281	30898	MFG1_3_BR2_IDA_TOF3_P50	30898_MFG1_3_BR2_IDA_TOF3_P50.wiff	HGH1	3635519	XP_722804	1	XP_722659.1	2	2	0.03	4.7		362
MFG1_3 (N-GFP)	MFG1	3643884	XP_714447.2	4738	6281	30898	MFG1_3_BR2_IDA_TOF3_P50	30898_MFG1_3_BR2_IDA_TOF3_P50.wiff	FBA1	3635548	XP_722836	1	XP_722690.1	2	2	0.03	10		359
MFG1_3 (N-GFP)	MFG1	3643884	XP_714447.2	4738	6281	30898	MFG1_3_BR2_IDA_TOF3_P50	30898_MFG1_3_BR2_IDA_TOF3_P50.wiff	NIP1	3635435	XP_722853	1	XP_722707.1	25	20	0.37	25.4		874
MFG1_3 (N-GFP)	MFG1	3643884	XP_714447.2	4738	6281	30898	MFG1_3_BR2_IDA_TOF3_P50	30898_MFG1_3_BR2_IDA_TOF3_P50.wiff	PWP1	3635456	XP_722858	1	XP_722712.1	2	2	0.03	5.6		612
MFG1_3 (N-GFP)	MFG1	3643884	XP_714447.2	4738	6281	30898	MFG1_3_BR2_IDA_TOF3_P50	30898_MFG1_3_BR2_IDA_TOF3_P50.wiff	BEM1	3635460	XP_722862	1	XP_722716.1	2	2	0.03	3.8		630
MFG1_3 (N-GFP)	MFG1	3643884	XP_714447.2	4738	6281	30898	MFG1_3_BR2_IDA_TOF3_P50	30898_MFG1_3_BR2_IDA_TOF3_P50.wiff	RPS6	3635476	XP_722877	1	XP_722731.1	13	5	0.2	28.8		205
MFG1_3 (N-GFP)	MFG1	3643884	XP_714447.2	4738	6281	30898	MFG1_3_BR2_IDA_TOF3_P50	30898_MFG1_3_BR2_IDA_TOF3_P50.wiff	SPT5	3635847	XP_722503	1	XP_722364.1	19	16	0.26	22.1		956
MFG1_3 (N-GFP)	MFG1	3643884	XP_714447.2	4738	6281	30898	MFG1_3_BR2_IDA_TOF3_P50	30898_MFG1_3_BR2_IDA_TOF3_P50.wiff	RPS26A	3635787	XP_722520	1	XP_722381.1	12	4	0.18	27.7		119
MFG1_3 (N-GFP)	MFG1	3643884	XP_714447.2	4738	6281	30898	MFG1_3_BR2_IDA_TOF3_P50	30898_MFG1_3_BR2_IDA_TOF3_P50.wiff	SNF2	3635855	XP_722570	1	XP_722432.1	6	6	0.09	4.5		1690
MFG1_3 (N-GFP)	MFG1	3643884	XP_714447.2	4738	6281	30898	MFG1_3_BR2_IDA_TOF3_P50	30898_MFG1_3_BR2_IDA_TOF3_P50.wiff	CAALFM_C202540WA	3635820	XP_722620	1	XP_722479.1	11	10	0.15	7.6		1722
MFG1_3 (N-GFP)	MFG1	3643884	XP_714447.2	4738	6281	30898	MFG1_3_BR2_IDA_TOF3_P50	30898_MFG1_3_BR2_IDA_TOF3_P50.wiff	RPN1	3636051	XP_722279	1	XP_722167.1	6	5	0.08	6		994
MFG1_3 (N-GFP)	MFG1	3643884	XP_714447.2	4738	6281	30898	MFG1_3_BR2_IDA_TOF3_P50	30898_MFG1_3_BR2_IDA_TOF3_P50.wiff	HSP70	3636073	XP_722300	1	XP_722186.1	65	10	0.65	42.1		656
MFG1_3 (N-GFP)	MFG1	3643884	XP_714447.2	4738	6281	30898	MFG1_3_BR2_IDA_TOF3_P50	30898_MFG1_3_BR2_IDA_TOF3_P50.wiff	CaO19.12461	3636035	XP_722313	1	XP_722199.1	6	6	0.08	15.8		444
MFG1_3 (N-GFP)	MFG1	3643884	XP_714447.2	4738	6281	30898	MFG1_3_BR2_IDA_TOF3_P50	30898_MFG1_3_BR2_IDA_TOF3_P50.wiff	ACT1	3636030	XP_722325	1	XP_722211.1	13	7	0.16	26.7		360
MFG1_3 (N-GFP)	MFG1	3643884	XP_714447.2	4738	6281	30898	MFG1_3_BR2_IDA_TOF3_P50	30898_MFG1_3_BR2_IDA_TOF3_P50.wiff	MYO2	3636089	XP_722333	1	XP_722219.1	26	20	0.39	14.5		1561
MFG1_3 (N-GFP)	MFG1	3643884	XP_714447.2	4738	6281	30898	MFG1_3_BR2_IDA_TOF3_P50	30898_MFG1_3_BR2_IDA_TOF3_P50.wiff	DOR14	3636097	XP_722341	1	XP_722227.1	3	3	0.04	7.4		517
MFG1_3 (N-GFP)	MFG1	3643884	XP_714447.2	4738	6281	30898	MFG1_3_BR2_IDA_TOF3_P50	30898_MFG1_3_BR2_IDA_TOF3_P50.wiff	YBP1	3636047	XP_722350	1	XP_722236.1	2	2	0.03	2.9		665
MFG1_3 (N-GFP)	MFG1	3643884	XP_714447.2	4738	6281	30898	MFG1_3_BR2_IDA_TOF3_P50	30898_MFG1_3_BR2_IDA_TOF3_P50.wiff	CAALFM_C113190WA	3636163	XP_722158	1		2	2	0.03	13		169
MFG1_3 (N-GFP)	MFG1	3643884	XP_714447.2	4738	6281	30898	MFG1_3_BR2_IDA_TOF3_P50	30898_MFG1_3_BR2_IDA_TOF3_P50.wiff	SAH1	3636277	XP_721980	1	XP_721821.1	7	6	0.11	17.6		450
MFG1_3 (N-GFP)	MFG1	3643884	XP_714447.2	4738	6281	30898	MFG1_3_BR2_IDA_TOF3_P50	30898_MFG1_3_BR2_IDA_TOF3_P50.wiff	YTA7	3636302	XP_722018	1	XP_721858.1	5	5	0.08	4.6		1314
MFG1_3 (N-GFP)	MFG1	3643884	XP_714447.2	4738	6281	30898	MFG1_3_BR2_IDA_TOF3_P50	30898_MFG1_3_BR2_IDA_TOF3_P50.wiff	MES1	3636253	XP_722024	1	XP_721864.1	2	2	0.03	4.4		748
MFG1_3 (N-GFP)	MFG1	3643884	XP_714447.2	4738	6281	30898	MFG1_3_BR2_IDA_TOF3_P50	30898_MFG1_3_BR2_IDA_TOF3_P50.wiff	SSD1	3636358	XP_722028	1	XP_721868.1	11	10	0.17	9.5		1262
MFG1_3 (N-GFP)	MFG1	3643884	XP_714447.2	4738	6281	30898	MFG1_3_BR2_IDA_TOF3_P50	30898_MFG1_3_BR2_IDA_TOF3_P50.wiff	HAS1	3636361	XP_722031	1	XP_721871.1	12	11	0.18	20.7		569
MFG1_3 (N-GFP)	MFG1	3643884	XP_714447.2	4738	6281	30898	MFG1_3_BR2_IDA_TOF3_P50	30898_MFG1_3_BR2_IDA_TOF3_P50.wiff	PFK1	3636239	XP_722036	1	XP_721876.1	12	7	0.11	9.4		987
MFG1_3 (N-GFP)	MFG1	3643884	XP_714447.2	4738	6281	30898	MFG1_3_BR2_IDA_TOF3_P50	30898_MFG1_3_BR2_IDA_TOF3_P50.wiff	CCT3	3636327	XP_722073	1	XP_721912.1	6	5	0.07	13.8		529
MFG1_3 (N-GFP)	MFG1	3643884	XP_714447.2	4738	6281	30898	MFG1_3_BR2_IDA_TOF3_P50	30898_MFG1_3_BR2_IDA_TOF3_P50.wiff	COR1	3636339	XP_722085	1	XP_721924.1	2	2	0.03	7.7		439
MFG1_3 (N-GFP)	MFG1	3643884	XP_714447.2	4738	6281	30898	MFG1_3_BR2_IDA_TOF3_P50	30898_MFG1_3_BR2_IDA_TOF3_P50.wiff	CaO19.11504	3636319	XP_722090	1	XP_721929.1	5	3	0.06	12.5		303
MFG1_3 (N-GFP)	MFG1	3643884	XP_714447.2	4738	6281	30898	MFG1_3_BR2_IDA_TOF3_P50	30898_MFG1_3_BR2_IDA_TOF3_P50.wiff	CAALFM_C302350WA	3636618	XP_721688	1		8	7	0.07	13.7		666
MFG1_3 (N-GFP)	MFG1	3643884	XP_714447.2	4738	6281	30898	MFG1_3_BR2_IDA_TOF3_P50	30898_MFG1_3_BR2_IDA_TOF3_P50.wiff	ILV2	3636552	XP_721692	1	XP_721571.1	10	9	0.15	19.2		683
MFG1_3 (N-GFP)	MFG1	3643884	XP_714447.2	4738	6281	30898	MFG1_3_BR2_IDA_TOF3_P50	30898_MFG1_3_BR2_IDA_TOF3_P50.wiff	GFA1	3636557	XP_721697	1	XP_721577.1	20	15	0.29	27.3		713
MFG1_3 (N-GFP)	MFG1	3643884	XP_714447.2	4738	6281	30898	MFG1_3_BR2_IDA_TOF3_P50	30898_MFG1_3_BR2_IDA_TOF3_P50.wiff	CAALFM_C302260CA	3636636	XP_721698	1	XP_721578.1	10	9	0.15	17.6		586
MFG1_3 (N-GFP)	MFG1	3643884	XP_714447.2	4738	6281	30898	MFG1_3_BR2_IDA_TOF3_P50	30898_MFG1_3_BR2_IDA_TOF3_P50.wiff	CAALFM_C302160CA	3636654	XP_721707	1	XP_721587.1	217	32	3.16	59.7		732
MFG1_3 (N-GFP)	MFG1	3643884	XP_714447.2	4738	6281	30898	MFG1_3_BR2_IDA_TOF3_P50	30898_MFG1_3_BR2_IDA_TOF3_P50.wiff	RPL12	3636659	XP_721712	1	XP_721592.1	19	7	0.28	53.9		165
MFG1_3 (N-GFP)	MFG1	3643884	XP_714447.2	4738	6281	30898	MFG1_3_BR2_IDA_TOF3_P50	30898_MFG1_3_BR2_IDA_TOF3_P50.wiff	CAALFM_C301890CA	3636561	XP_721735	1	XP_721616.1	3	2	0.03	15.9		345
MFG1_3 (N-GFP)	MFG1	3643884	XP_714447.2	4738	6281	30898	MFG1_3_BR2_IDA_TOF3_P50	30898_MFG1_3_BR2_IDA_TOF3_P50.wiff	DBP5	3636564	XP_721738	1	XP_721619.1	13	10	0.19	25.4		540
MFG1_3 (N-GFP)	MFG1	3643884	XP_714447.2	4738	6281	30898	MFG1_3_BR2_IDA_TOF3_P50	30898_MFG1_3_BR2_IDA_TOF3_P50.wiff	CAALFM_C301720CA	3636601	XP_721749	1	XP_721630.1	25	19	0.35	23.8		1221
MFG1_3 (N-GFP)	MFG1	3643884	XP_714447.2	4738	6281	30898	MFG1_3_BR2_IDA_TOF3_P50	30898_MFG1_3_BR2_IDA_TOF3_P50.wiff	CAALFM_C301560WA	3636669	XP_721764	1	XP_721644.1	8	7	0.11	11.7		767
MFG1_3 (N-GFP)	MFG1	3643884	XP_714447.2	4738	6281	30898	MFG1_3_BR2_IDA_TOF3_P50	30898_MFG1_3_BR2_IDA_TOF3_P50.wiff	CAALFM_C301520CA	3636570	XP_721769	1	XP_721648.1	2	2	0.03	5.7		353
MFG1_3 (N-GFP)	MFG1	3643884	XP_714447.2	4738	6281	30898	MFG1_3_BR2_IDA_TOF3_P50	30898_MFG1_3_BR2_IDA_TOF3_P50.wiff	RPS7A	3636573	XP_721772	1	XP_721651.1	27	11	0.42	63.4		186
MFG1_3 (N-GFP)	MFG1	3643884	XP_714447.2	4738	6281	30898	MFG1_3_BR2_IDA_TOF3_P50	30898_MFG1_3_BR2_IDA_TOF3_P50.wiff	GEA2	3636646	XP_721784	1	XP_721663.1	3	3	0.05	3		1015
MFG1_3 (N-GFP)	MFG1	3643884	XP_714447.2	4738	6281	30898	MFG1_3_BR2_IDA_TOF3_P50	30898_MFG1_3_BR2_IDA_TOF3_P50.wiff	GSC1	3636794	XP_721429	1	XP_721157.1	7	6	0.08	4		1897
MFG1_3 (N-GFP)	MFG1	3643884	XP_714447.2	4738	6281	30898	MFG1_3_BR2_IDA_TOF3_P50	30898_MFG1_3_BR2_IDA_TOF3_P50.wiff	CAALFM_C102430CA	3636846	XP_721430	1	XP_721158.1	3	3	0.05	4.9		648
MFG1_3 (N-GFP)	MFG1	3643884	XP_714447.2	4738	6281	30898	MFG1_3_BR2_IDA_TOF3_P50	30898_MFG1_3_BR2_IDA_TOF3_P50.wiff	RPL10	3636850	XP_721434	1	XP_721162.1	15	6	0.18	31.4		220
MFG1_3 (N-GFP)	MFG1	3643884	XP_714447.2	4738	6281	30898	MFG1_3_BR2_IDA_TOF3_P50	30898_MFG1_3_BR2_IDA_TOF3_P50.wiff	TIF34	3636872	XP_721466	1	XP_721194.1	17	12	0.26	46.9		350
MFG1_3 (N-GFP)	MFG1	3643884	XP_714447.2	4738	6281	30898	MFG1_3_BR2_IDA_TOF3_P50	30898_MFG1_3_BR2_IDA_TOF3_P50.wiff	YKT6	3636863	XP_721473	1	XP_721201.1	10	8	0.14	48		200
MFG1_3 (N-GFP)	MFG1	3643884	XP_714447.2	4738	6281	30898	MFG1_3_BR2_IDA_TOF3_P50	30898_MFG1_3_BR2_IDA_TOF3_P50.wiff	CDC73	3636830	XP_721481	1	XP_721209.1	2	2	0.03	6.5		370
MFG1_3 (N-GFP)	MFG1	3643884	XP_714447.2	4738	6281	30898	MFG1_3_BR2_IDA_TOF3_P50	30898_MFG1_3_BR2_IDA_TOF3_P50.wiff	RPL13	3636841	XP_721492	1	XP_721220.1	14	7	0.22	42.1		202
MFG1_3 (N-GFP)	MFG1	3643884	XP_714447.2	4738	6281	30898	MFG1_3_BR2_IDA_TOF3_P50	30898_MFG1_3_BR2_IDA_TOF3_P50.wiff	RPS1	3636924	XP_721500	1	XP_721229.1	36	12	0.55	47.3		256
MFG1_3 (N-GFP)	MFG1	3643884	XP_714447.2	4738	6281	30898	MFG1_3_BR2_IDA_TOF3_P50	30898_MFG1_3_BR2_IDA_TOF3_P50.wiff	CAALFM_C103100WA	3636925	XP_721501	1	XP_721230.1	7	7	0.1	9.4		1262
MFG1_3 (N-GFP)	MFG1	3643884	XP_714447.2	4738	6281	30898	MFG1_3_BR2_IDA_TOF3_P50	30898_MFG1_3_BR2_IDA_TOF3_P50.wiff	CDC12	3636809	XP_721511	1	XP_721240.1	7	6	0.09	18.1		370
MFG1_3 (N-GFP)	MFG1	3643884	XP_714447.2	4738	6281	30898	MFG1_3_BR2_IDA_TOF3_P50	30898_MFG1_3_BR2_IDA_TOF3_P50.wiff	BMH1	3636810	XP_721512	1	XP_721241.1	8	6	0.12	25.8		264
MFG1_3 (N-GFP)	MFG1	3643884	XP_714447.2	4738	6281	30898	MFG1_3_BR2_IDA_TOF3_P50	30898_MFG1_3_BR2_IDA_TOF3_P50.wiff	RLI1	3636888	XP_721532	1	XP_721261.1	20	13	0.28	24.8		622
MFG1_3 (N-GFP)	MFG1	3643884	XP_714447.2	4738	6281	30898	MFG1_3_BR2_IDA_TOF3_P50	30898_MFG1_3_BR2_IDA_TOF3_P50.wiff	CAALFM_C103360WA	3636889	XP_721533	1	XP_721262.1	5	5	0.08	3.9		1410
MFG1_3 (N-GFP)	MFG1	3643884	XP_714447.2	4738	6281	30898	MFG1_3_BR2_IDA_TOF3_P50	30898_MFG1_3_BR2_IDA_TOF3_P50.wiff	CAALFM_C103370WA	3636891	XP_721535	1	XP_721264.1	3	3	0.05	5.1		629
MFG1_3 (N-GFP)	MFG1	3643884	XP_714447.2	4738	6281	30898	MFG1_3_BR2_IDA_TOF3_P50	30898_MFG1_3_BR2_IDA_TOF3_P50.wiff	RPN3	3636917	XP_721552	1	XP_721281.1	7	6	0.09	16.2		481
MFG1_3 (N-GFP)	MFG1	3643884	XP_714447.2	4738	6281	30898	MFG1_3_BR2_IDA_TOF3_P50	30898_MFG1_3_BR2_IDA_TOF3_P50.wiff	COQ6	3636878	XP_721556	1	XP_721285.1	3	3	0.05	7.5		480
MFG1_3 (N-GFP)	MFG1	3643884	XP_714447.2	4738	6281	30898	MFG1_3_BR2_IDA_TOF3_P50	30898_MFG1_3_BR2_IDA_TOF3_P50.wiff	MRPL27	3636884	XP_721562	1	XP_721291.1	2	2	0.03	12.5		168
MFG1_3 (N-GFP)	MFG1	3643884	XP_714447.2	4738	6281	30898	MFG1_3_BR2_IDA_TOF3_P50	30898_MFG1_3_BR2_IDA_TOF3_P50.wiff	CAALFM_C702120CA	3637019	XP_721341	1	XP_720828.1; XP_888832.1	2	2	0.03	13.1		153
MFG1_3 (N-GFP)	MFG1	3643884	XP_714447.2	4738	6281	30898	MFG1_3_BR2_IDA_TOF3_P50	30898_MFG1_3_BR2_IDA_TOF3_P50.wiff	HSP90	3636951	XP_721353	1	XP_720840.1; XP_888823.1	40	22	0.61	33.9		707
MFG1_3 (N-GFP)	MFG1	3643884	XP_714447.2	4738	6281	30898	MFG1_3_BR2_IDA_TOF3_P50	30898_MFG1_3_BR2_IDA_TOF3_P50.wiff	TOM40	3636968	XP_721362	1	XP_720849.1; XP_888817.1	5	5	0.07	16.2		390
MFG1_3 (N-GFP)	MFG1	3643884	XP_714447.2	4738	6281	30898	MFG1_3_BR2_IDA_TOF3_P50	30898_MFG1_3_BR2_IDA_TOF3_P50.wiff	RVB2	3637055	XP_721377	1	XP_720864.1; XP_888802.1	4	3	0.06	8.6		498
MFG1_3 (N-GFP)	MFG1	3643884	XP_714447.2	4738	6281	30898	MFG1_3_BR2_IDA_TOF3_P50	30898_MFG1_3_BR2_IDA_TOF3_P50.wiff	PFK2	3637056	XP_721378	1	XP_720865.1; XP_888801.1	20	14	0.25	19.8		946
MFG1_3 (N-GFP)	MFG1	3643884	XP_714447.2	4738	6281	30898	MFG1_3_BR2_IDA_TOF3_P50	30898_MFG1_3_BR2_IDA_TOF3_P50.wiff	RPL5	3637057	XP_721379	1	XP_720866.1; XP_888800.1	6	3	0.09	11.4		298
MFG1_3 (N-GFP)	MFG1	3643884	XP_714447.2	4738	6281	30898	MFG1_3_BR2_IDA_TOF3_P50	30898_MFG1_3_BR2_IDA_TOF3_P50.wiff	BEM2	3637044	XP_721409	1	XP_720896.1; XP_888778.1	13	11	0.16	6.4		2252
MFG1_3 (N-GFP)	MFG1	3643884	XP_714447.2	4738	6281	30898	MFG1_3_BR2_IDA_TOF3_P50	30898_MFG1_3_BR2_IDA_TOF3_P50.wiff	PRT1	3636959	XP_721420	1	XP_720907.1; XP_888768.1	20	17	0.31	29.2		739
MFG1_3 (N-GFP)	MFG1	3643884	XP_714447.2	4738	6281	30898	MFG1_3_BR2_IDA_TOF3_P50	30898_MFG1_3_BR2_IDA_TOF3_P50.wiff	PYC2	3637203	XP_721034	1	XP_720913.1	3	3	0.05	3.2		982
MFG1_3 (N-GFP)	MFG1	3643884	XP_714447.2	4738	6281	30898	MFG1_3_BR2_IDA_TOF3_P50	30898_MFG1_3_BR2_IDA_TOF3_P50.wiff	CaO19.8435	3637236	XP_721061	1	XP_720939.1	24	20	0.33	13.2		1914
MFG1_3 (N-GFP)	MFG1	3643884	XP_714447.2	4738	6281	30898	MFG1_3_BR2_IDA_TOF3_P50	30898_MFG1_3_BR2_IDA_TOF3_P50.wiff	GCD7	3637289	XP_721071	1	XP_720949.1	3	3	0.05	9.3		365
MFG1_3 (N-GFP)	MFG1	3643884	XP_714447.2	4738	6281	30898	MFG1_3_BR2_IDA_TOF3_P50	30898_MFG1_3_BR2_IDA_TOF3_P50.wiff	RPL21	3637227	XP_721086	1	XP_720964.1	9	4	0.14	44		109
MFG1_3 (N-GFP)	MFG1	3643884	XP_714447.2	4738	6281	30898	MFG1_3_BR2_IDA_TOF3_P50	30898_MFG1_3_BR2_IDA_TOF3_P50.wiff	ROM2	3637279	XP_721146	1	XP_721025.1	5	3	0.04	3.3		1381
MFG1_3 (N-GFP)	MFG1	3643884	XP_714447.2	4738	6281	30898	MFG1_3_BR2_IDA_TOF3_P50	30898_MFG1_3_BR2_IDA_TOF3_P50.wiff	GCD11	3637619	XP_720662	1	XP_720534.1	19	11	0.26	24.3		534
MFG1_3 (N-GFP)	MFG1	3643884	XP_714447.2	4738	6281	30898	MFG1_3_BR2_IDA_TOF3_P50	30898_MFG1_3_BR2_IDA_TOF3_P50.wiff	RET2	3637630	XP_720673	1	XP_720546.1	8	5	0.12	12.9		573
MFG1_3 (N-GFP)	MFG1	3643884	XP_714447.2	4738	6281	30898	MFG1_3_BR2_IDA_TOF3_P50	30898_MFG1_3_BR2_IDA_TOF3_P50.wiff	TIF5	3637599	XP_720697	1	XP_720569.1	2	2	0.03	5		420
MFG1_3 (N-GFP)	MFG1	3643884	XP_714447.2	4738	6281	30898	MFG1_3_BR2_IDA_TOF3_P50	30898_MFG1_3_BR2_IDA_TOF3_P50.wiff	CaO19.11759	3637587	XP_720719	1	XP_720591.1	3	3	0.05	17		335
MFG1_3 (N-GFP)	MFG1	3643884	XP_714447.2	4738	6281	30898	MFG1_3_BR2_IDA_TOF3_P50	30898_MFG1_3_BR2_IDA_TOF3_P50.wiff	RPS5	3637570	XP_720769	1	XP_720641.1	6	4	0.09	18.7		225
MFG1_3 (N-GFP)	MFG1	3643884	XP_714447.2	4738	6281	30898	MFG1_3_BR2_IDA_TOF3_P50	30898_MFG1_3_BR2_IDA_TOF3_P50.wiff	CAALFM_C403290WA	3637887	XP_720417	1	XP_720189.1	9	9	0.13	11.8		899
MFG1_3 (N-GFP)	MFG1	3643884	XP_714447.2	4738	6281	30898	MFG1_3_BR2_IDA_TOF3_P50	30898_MFG1_3_BR2_IDA_TOF3_P50.wiff	NAN1	3637932	XP_720441	1	XP_720211.1	3	2	0.03	4.8		839
MFG1_3 (N-GFP)	MFG1	3643884	XP_714447.2	4738	6281	30898	MFG1_3_BR2_IDA_TOF3_P50	30898_MFG1_3_BR2_IDA_TOF3_P50.wiff	ABP1	3637875	XP_720452	1	XP_720222.1	2	2	0.03	3.5		648
MFG1_3 (N-GFP)	MFG1	3643884	XP_714447.2	4738	6281	30898	MFG1_3_BR2_IDA_TOF3_P50	30898_MFG1_3_BR2_IDA_TOF3_P50.wiff	ZUO1	3637908	XP_720460	1	XP_720230.1	9	8	0.14	21.8		427
MFG1_3 (N-GFP)	MFG1	3643884	XP_714447.2	4738	6281	30898	MFG1_3_BR2_IDA_TOF3_P50	30898_MFG1_3_BR2_IDA_TOF3_P50.wiff	CAALFM_C402780WA	3637902	XP_720470	1	XP_720240.1	6	5	0.08	13.4		544
MFG1_3 (N-GFP)	MFG1	3643884	XP_714447.2	4738	6281	30898	MFG1_3_BR2_IDA_TOF3_P50	30898_MFG1_3_BR2_IDA_TOF3_P50.wiff	CAALFM_C701030CA	3638019	XP_720305	1	XP_888733.1	15	12	0.22	11.4		1217
MFG1_3 (N-GFP)	MFG1	3643884	XP_714447.2	4738	6281	30898	MFG1_3_BR2_IDA_TOF3_P50	30898_MFG1_3_BR2_IDA_TOF3_P50.wiff	RPP0	3638023	XP_720309	1	XP_888730.1	28	10	0.43	41.3		312
MFG1_3 (N-GFP)	MFG1	3643884	XP_714447.2	4738	6281	30898	MFG1_3_BR2_IDA_TOF3_P50	30898_MFG1_3_BR2_IDA_TOF3_P50.wiff	RPS18	3637953	XP_720312	1	XP_888727.1	10	5	0.14	37.8		135
MFG1_3 (N-GFP)	MFG1	3643884	XP_714447.2	4738	6281	30898	MFG1_3_BR2_IDA_TOF3_P50	30898_MFG1_3_BR2_IDA_TOF3_P50.wiff	YML6	3637954	XP_720313	1	XP_888726.1	3	3	0.05	14.4		278
MFG1_3 (N-GFP)	MFG1	3643884	XP_714447.2	4738	6281	30898	MFG1_3_BR2_IDA_TOF3_P50	30898_MFG1_3_BR2_IDA_TOF3_P50.wiff	RFC2	3637939	XP_720328	1	XP_888712.1	3	3	0.05	11.3		363
MFG1_3 (N-GFP)	MFG1	3643884	XP_714447.2	4738	6281	30898	MFG1_3_BR2_IDA_TOF3_P50	30898_MFG1_3_BR2_IDA_TOF3_P50.wiff	GUS1	3638029	XP_720349	1	XP_888694.1	6	6	0.07	8.1		725
MFG1_3 (N-GFP)	MFG1	3643884	XP_714447.2	4738	6281	30898	MFG1_3_BR2_IDA_TOF3_P50	30898_MFG1_3_BR2_IDA_TOF3_P50.wiff	RPA135	3637996	XP_720354	1	XP_888689.1	9	9	0.14	9.3		1166
MFG1_3 (N-GFP)	MFG1	3643884	XP_714447.2	4738	6281	30898	MFG1_3_BR2_IDA_TOF3_P50	30898_MFG1_3_BR2_IDA_TOF3_P50.wiff	CAALFM_C700520WA	3638001	XP_720359	1	XP_888685.1	2	2	0.03	1.8		1091
MFG1_3 (N-GFP)	MFG1	3643884	XP_714447.2	4738	6281	30898	MFG1_3_BR2_IDA_TOF3_P50	30898_MFG1_3_BR2_IDA_TOF3_P50.wiff	CAALFM_C700350CA	3638039	XP_720376	1	XP_888669.1	17	11	0.25	32.1		439
MFG1_3 (N-GFP)	MFG1	3643884	XP_714447.2	4738	6281	30898	MFG1_3_BR2_IDA_TOF3_P50	30898_MFG1_3_BR2_IDA_TOF3_P50.wiff	CAALFM_C700340CA	3638040	XP_720377	1	XP_888668.1	2	2	0.03	2.6		971
MFG1_3 (N-GFP)	MFG1	3643884	XP_714447.2	4738	6281	30898	MFG1_3_BR2_IDA_TOF3_P50	30898_MFG1_3_BR2_IDA_TOF3_P50.wiff	CAALFM_C700250CA	3637979	XP_720388	1	XP_888659.1	22	8	0.32	52.4		187
MFG1_3 (N-GFP)	MFG1	3643884	XP_714447.2	4738	6281	30898	MFG1_3_BR2_IDA_TOF3_P50	30898_MFG1_3_BR2_IDA_TOF3_P50.wiff	RVS161	3638005	XP_720414	1	XP_888636.1	6	5	0.08	20.1		293
MFG1_3 (N-GFP)	MFG1	3643884	XP_714447.2	4738	6281	30898	MFG1_3_BR2_IDA_TOF3_P50	30898_MFG1_3_BR2_IDA_TOF3_P50.wiff	RPL9	3638287	XP_720065	1	XP_719935.1	17	8	0.25	49.2		191
MFG1_3 (N-GFP)	MFG1	3643884	XP_714447.2	4738	6281	30898	MFG1_3_BR2_IDA_TOF3_P50	30898_MFG1_3_BR2_IDA_TOF3_P50.wiff	STH1	3638290	XP_720068	1	XP_719938.1	5	5	0.06	4.4		1303
MFG1_3 (N-GFP)	MFG1	3643884	XP_714447.2	4738	6281	30898	MFG1_3_BR2_IDA_TOF3_P50	30898_MFG1_3_BR2_IDA_TOF3_P50.wiff	HTZ1	3638209	XP_720154	1	XP_720022.1	6	3	0.07	30.1		133
MFG1_3 (N-GFP)	MFG1	3643884	XP_714447.2	4738	6281	30898	MFG1_3_BR2_IDA_TOF3_P50	30898_MFG1_3_BR2_IDA_TOF3_P50.wiff	MSL5	3638211	XP_720156	1	XP_720024.1	4	3	0.06	7.3		455
MFG1_3 (N-GFP)	MFG1	3643884	XP_714447.2	4738	6281	30898	MFG1_3_BR2_IDA_TOF3_P50	30898_MFG1_3_BR2_IDA_TOF3_P50.wiff	TIP120	3638494	XP_719828	1	XP_719711.1	3	2	0.05	1.8		1241
MFG1_3 (N-GFP)	MFG1	3643884	XP_714447.2	4738	6281	30898	MFG1_3_BR2_IDA_TOF3_P50	30898_MFG1_3_BR2_IDA_TOF3_P50.wiff	TPI1	3638482	XP_719842	1	XP_719725.1	2	2	0.03	10.5		248
MFG1_3 (N-GFP)	MFG1	3643884	XP_714447.2	4738	6281	30898	MFG1_3_BR2_IDA_TOF3_P50	30898_MFG1_3_BR2_IDA_TOF3_P50.wiff	GCD2	3638437	XP_719872	1	XP_719755.1	4	3	0.05	10.4		500
MFG1_3 (N-GFP)	MFG1	3643884	XP_714447.2	4738	6281	30898	MFG1_3_BR2_IDA_TOF3_P50	30898_MFG1_3_BR2_IDA_TOF3_P50.wiff	PRO2	3638532	XP_719875	1	XP_719758.1	5	4	0.06	10.8		446
MFG1_3 (N-GFP)	MFG1	3643884	XP_714447.2	4738	6281	30898	MFG1_3_BR2_IDA_TOF3_P50	30898_MFG1_3_BR2_IDA_TOF3_P50.wiff	RPS12	3638438	XP_719881	1	XP_719764.1	4	2	0.06	14		143
MFG1_3 (N-GFP)	MFG1	3643884	XP_714447.2	4738	6281	30898	MFG1_3_BR2_IDA_TOF3_P50	30898_MFG1_3_BR2_IDA_TOF3_P50.wiff	HHT1	3638444	XP_719887	1	XP_719770.1; XP_713710.1; XP_713665.1; XP_711082.1; XP_711038.1	6	3	0.07	16.9		136
MFG1_3 (N-GFP)	MFG1	3643884	XP_714447.2	4738	6281	30898	MFG1_3_BR2_IDA_TOF3_P50	30898_MFG1_3_BR2_IDA_TOF3_P50.wiff	SSN6	3638518	XP_719894	1	XP_719777.1	2	2	0.03	3.5		1080
MFG1_3 (N-GFP)	MFG1	3643884	XP_714447.2	4738	6281	30898	MFG1_3_BR2_IDA_TOF3_P50	30898_MFG1_3_BR2_IDA_TOF3_P50.wiff	CAALFM_C306970WA	3638506	XP_719899	1	XP_719782.1	3	3	0.05	4.8		606
MFG1_3 (N-GFP)	MFG1	3643884	XP_714447.2	4738	6281	30898	MFG1_3_BR2_IDA_TOF3_P50	30898_MFG1_3_BR2_IDA_TOF3_P50.wiff	TPD3	3638512	XP_719905	1	XP_719788.1	10	9	0.13	18.2		643
MFG1_3 (N-GFP)	MFG1	3643884	XP_714447.2	4738	6281	30898	MFG1_3_BR2_IDA_TOF3_P50	30898_MFG1_3_BR2_IDA_TOF3_P50.wiff	TDH3	3638540	XP_719909	1	XP_719792.1	33	14	0.49	51.6		335
MFG1_3 (N-GFP)	MFG1	3643884	XP_714447.2	4738	6281	30898	MFG1_3_BR2_IDA_TOF3_P50	30898_MFG1_3_BR2_IDA_TOF3_P50.wiff	RPN9	3638686	XP_719572	1	XP_719443.1	2	2	0.03	4.6		416
MFG1_3 (N-GFP)	MFG1	3643884	XP_714447.2	4738	6281	30898	MFG1_3_BR2_IDA_TOF3_P50	30898_MFG1_3_BR2_IDA_TOF3_P50.wiff	NIC96	3638677	XP_719580	1	XP_719452.1	6	4	0.05	7.5		960
MFG1_3 (N-GFP)	MFG1	3643884	XP_714447.2	4738	6281	30898	MFG1_3_BR2_IDA_TOF3_P50	30898_MFG1_3_BR2_IDA_TOF3_P50.wiff	KAR2	3638764	XP_719590	1	XP_719462.1	39	20	0.5	35.1		687
MFG1_3 (N-GFP)	MFG1	3643884	XP_714447.2	4738	6281	30898	MFG1_3_BR2_IDA_TOF3_P50	30898_MFG1_3_BR2_IDA_TOF3_P50.wiff	RPA49	3638767	XP_719593	1	XP_719466.1	8	7	0.12	21.1		393
MFG1_3 (N-GFP)	MFG1	3643884	XP_714447.2	4738	6281	30898	MFG1_3_BR2_IDA_TOF3_P50	30898_MFG1_3_BR2_IDA_TOF3_P50.wiff	MRPL16	3638769	XP_719595	1	XP_719468.1	8	5	0.12	25.8		213
MFG1_3 (N-GFP)	MFG1	3643884	XP_714447.2	4738	6281	30898	MFG1_3_BR2_IDA_TOF3_P50	30898_MFG1_3_BR2_IDA_TOF3_P50.wiff	RFC5	3638785	XP_719603	1	XP_719478.1	4	4	0.06	13.8		362
MFG1_3 (N-GFP)	MFG1	3643884	XP_714447.2	4738	6281	30898	MFG1_3_BR2_IDA_TOF3_P50	30898_MFG1_3_BR2_IDA_TOF3_P50.wiff	NDT801	3638718	XP_719690	1	XP_719565.1	28	9	0.43	21.2		504
MFG1_3 (N-GFP)	MFG1	3643884	XP_714447.2	4738	6281	30898	MFG1_3_BR2_IDA_TOF3_P50	30898_MFG1_3_BR2_IDA_TOF3_P50.wiff	CAALFM_CR09740WA	3639008	XP_719308	1		4	3	0.05	10.8		399
MFG1_3 (N-GFP)	MFG1	3643884	XP_714447.2	4738	6281	30898	MFG1_3_BR2_IDA_TOF3_P50	30898_MFG1_3_BR2_IDA_TOF3_P50.wiff	SIK1	3638925	XP_719331	1		79	22	1.16	58.1		516
MFG1_3 (N-GFP)	MFG1	3643884	XP_714447.2	4738	6281	30898	MFG1_3_BR2_IDA_TOF3_P50	30898_MFG1_3_BR2_IDA_TOF3_P50.wiff	FAA4	3638973	XP_719354	1		5	4	0.05	9.2		696
MFG1_3 (N-GFP)	MFG1	3643884	XP_714447.2	4738	6281	30898	MFG1_3_BR2_IDA_TOF3_P50	30898_MFG1_3_BR2_IDA_TOF3_P50.wiff	UTP5	3638922	XP_719361	1		6	5	0.08	11.5		636
MFG1_3 (N-GFP)	MFG1	3643884	XP_714447.2	4738	6281	30898	MFG1_3_BR2_IDA_TOF3_P50	30898_MFG1_3_BR2_IDA_TOF3_P50.wiff	TRX1	3638950	XP_719372	1		10	4	0.13	40.8		103
MFG1_3 (N-GFP)	MFG1	3643884	XP_714447.2	4738	6281	30898	MFG1_3_BR2_IDA_TOF3_P50	30898_MFG1_3_BR2_IDA_TOF3_P50.wiff	HCR1	3638952	XP_719374	1		2	2	0.03	9.5		285
MFG1_3 (N-GFP)	MFG1	3643884	XP_714447.2	4738	6281	30898	MFG1_3_BR2_IDA_TOF3_P50	30898_MFG1_3_BR2_IDA_TOF3_P50.wiff	EIF4E	3638981	XP_719387	1		8	6	0.12	30.6		209
MFG1_3 (N-GFP)	MFG1	3643884	XP_714447.2	4738	6281	30898	MFG1_3_BR2_IDA_TOF3_P50	30898_MFG1_3_BR2_IDA_TOF3_P50.wiff	DRS1	3639045	XP_719395	1		4	4	0.06	7.8		613
MFG1_3 (N-GFP)	MFG1	3643884	XP_714447.2	4738	6281	30898	MFG1_3_BR2_IDA_TOF3_P50	30898_MFG1_3_BR2_IDA_TOF3_P50.wiff	SRP72	3639106	XP_719198	1	XP_719081.1	6	5	0.07	12.1		635
MFG1_3 (N-GFP)	MFG1	3643884	XP_714447.2	4738	6281	30898	MFG1_3_BR2_IDA_TOF3_P50	30898_MFG1_3_BR2_IDA_TOF3_P50.wiff	NAB3	3639067	XP_719211	1	XP_719094.1	15	11	0.23	20.8		836
MFG1_3 (N-GFP)	MFG1	3643884	XP_714447.2	4738	6281	30898	MFG1_3_BR2_IDA_TOF3_P50	30898_MFG1_3_BR2_IDA_TOF3_P50.wiff	RNH12	3639090	XP_719243	1	XP_719126.1	6	5	0.08	28		232
MFG1_3 (N-GFP)	MFG1	3643884	XP_714447.2	4738	6281	30898	MFG1_3_BR2_IDA_TOF3_P50	30898_MFG1_3_BR2_IDA_TOF3_P50.wiff	SHE3	3639162	XP_719272	1	XP_719156.1	4	3	0.05	8.9		519
MFG1_3 (N-GFP)	MFG1	3643884	XP_714447.2	4738	6281	30898	MFG1_3_BR2_IDA_TOF3_P50	30898_MFG1_3_BR2_IDA_TOF3_P50.wiff	POL5	3639122	XP_719274	1	XP_719159.1	2	2	0.03	3.2		1055
MFG1_3 (N-GFP)	MFG1	3643884	XP_714447.2	4738	6281	30898	MFG1_3_BR2_IDA_TOF3_P50	30898_MFG1_3_BR2_IDA_TOF3_P50.wiff	PHZ1	3639152	XP_719296	1	XP_719180.1	3	3	0.03	12.3		302
MFG1_3 (N-GFP)	MFG1	3643884	XP_714447.2	4738	6281	30898	MFG1_3_BR2_IDA_TOF3_P50	30898_MFG1_3_BR2_IDA_TOF3_P50.wiff	CaO19.13072	3639134	XP_719303	1	XP_719187.1	4	4	0.06	15.2		369
MFG1_3 (N-GFP)	MFG1	3643884	XP_714447.2	4738	6281	30898	MFG1_3_BR2_IDA_TOF3_P50	30898_MFG1_3_BR2_IDA_TOF3_P50.wiff	TUB2	3639329	XP_718996	1	XP_718894.1	15	6	0.21	20.5		303
MFG1_3 (N-GFP)	MFG1	3643884	XP_714447.2	4738	6281	30898	MFG1_3_BR2_IDA_TOF3_P50	30898_MFG1_3_BR2_IDA_TOF3_P50.wiff	TUF1	3639360	XP_719009	1	XP_718907.1	5	5	0.08	14.1		426
MFG1_3 (N-GFP)	MFG1	3643884	XP_714447.2	4738	6281	30898	MFG1_3_BR2_IDA_TOF3_P50	30898_MFG1_3_BR2_IDA_TOF3_P50.wiff	RPL16A	3639338	XP_719047	1	XP_718943.1	16	6	0.24	23.5		200
MFG1_3 (N-GFP)	MFG1	3643884	XP_714447.2	4738	6281	30898	MFG1_3_BR2_IDA_TOF3_P50	30898_MFG1_3_BR2_IDA_TOF3_P50.wiff	CAALFM_C100160CA	3639341	XP_719050	1	XP_718946.1	21	13	0.31	37.2		400
MFG1_3 (N-GFP)	MFG1	3643884	XP_714447.2	4738	6281	30898	MFG1_3_BR2_IDA_TOF3_P50	30898_MFG1_3_BR2_IDA_TOF3_P50.wiff	CCT8	3639324	XP_719058	1	XP_718954.1	6	6	0.08	13.9		540
MFG1_3 (N-GFP)	MFG1	3643884	XP_714447.2	4738	6281	30898	MFG1_3_BR2_IDA_TOF3_P50	30898_MFG1_3_BR2_IDA_TOF3_P50.wiff	TUP1	3639369	XP_719068	1	XP_718964.1	3	3	0.05	7.2		514
MFG1_3 (N-GFP)	MFG1	3643884	XP_714447.2	4738	6281	30898	MFG1_3_BR2_IDA_TOF3_P50	30898_MFG1_3_BR2_IDA_TOF3_P50.wiff	DHH1	3639490	XP_718788	1	XP_718704.1	10	8	0.15	18.8		549
MFG1_3 (N-GFP)	MFG1	3643884	XP_714447.2	4738	6281	30898	MFG1_3_BR2_IDA_TOF3_P50	30898_MFG1_3_BR2_IDA_TOF3_P50.wiff	SUI2	3639569	XP_718803	1	XP_718720.1	9	8	0.14	25		300
MFG1_3 (N-GFP)	MFG1	3643884	XP_714447.2	4738	6281	30898	MFG1_3_BR2_IDA_TOF3_P50	30898_MFG1_3_BR2_IDA_TOF3_P50.wiff	PGA63	3639524	XP_718807	1	XP_718724.1	4	4	0.06	4.1		1265
MFG1_3 (N-GFP)	MFG1	3643884	XP_714447.2	4738	6281	30898	MFG1_3_BR2_IDA_TOF3_P50	30898_MFG1_3_BR2_IDA_TOF3_P50.wiff	CAALFM_C106600WA	3639513	XP_718839	1	XP_718753.1	14	6	0.22	23.6		347
MFG1_3 (N-GFP)	MFG1	3643884	XP_714447.2	4738	6281	30898	MFG1_3_BR2_IDA_TOF3_P50	30898_MFG1_3_BR2_IDA_TOF3_P50.wiff	RPS22A	3639551	XP_718852	1	XP_718767.1	13	6	0.19	56.9		130
MFG1_3 (N-GFP)	MFG1	3643884	XP_714447.2	4738	6281	30898	MFG1_3_BR2_IDA_TOF3_P50	30898_MFG1_3_BR2_IDA_TOF3_P50.wiff	ACC1	3639688	XP_718624	1		10	10	0.14	5.2		2271
MFG1_3 (N-GFP)	MFG1	3643884	XP_714447.2	4738	6281	30898	MFG1_3_BR2_IDA_TOF3_P50	30898_MFG1_3_BR2_IDA_TOF3_P50.wiff	CRM1	3639721	XP_718640	1		4	4	0.06	3.1		1079
MFG1_3 (N-GFP)	MFG1	3643884	XP_714447.2	4738	6281	30898	MFG1_3_BR2_IDA_TOF3_P50	30898_MFG1_3_BR2_IDA_TOF3_P50.wiff	MRPL6	3639724	XP_718643	1		5	5	0.07	26.6		233
MFG1_3 (N-GFP)	MFG1	3643884	XP_714447.2	4738	6281	30898	MFG1_3_BR2_IDA_TOF3_P50	30898_MFG1_3_BR2_IDA_TOF3_P50.wiff	NAP1	3639714	XP_718658	1		8	6	0.1	15.4		435
MFG1_3 (N-GFP)	MFG1	3643884	XP_714447.2	4738	6281	30898	MFG1_3_BR2_IDA_TOF3_P50	30898_MFG1_3_BR2_IDA_TOF3_P50.wiff	KIN2	3639697	XP_718667	1		4	4	0.06	3.9		1212
MFG1_3 (N-GFP)	MFG1	3643884	XP_714447.2	4738	6281	30898	MFG1_3_BR2_IDA_TOF3_P50	30898_MFG1_3_BR2_IDA_TOF3_P50.wiff	CAALFM_CR00130CA	3639709	XP_718679	1		2	2	0.03	6.9		390
MFG1_3 (N-GFP)	MFG1	3643884	XP_714447.2	4738	6281	30898	MFG1_3_BR2_IDA_TOF3_P50	30898_MFG1_3_BR2_IDA_TOF3_P50.wiff	MIS12	3639669	XP_718690	1		13	10	0.17	18.6		1025
MFG1_3 (N-GFP)	MFG1	3643884	XP_714447.2	4738	6281	30898	MFG1_3_BR2_IDA_TOF3_P50	30898_MFG1_3_BR2_IDA_TOF3_P50.wiff	CAALFM_CR00060CA	3639673	XP_718694	1		3	3	0.04	5.2		618
MFG1_3 (N-GFP)	MFG1	3643884	XP_714447.2	4738	6281	30898	MFG1_3_BR2_IDA_TOF3_P50	30898_MFG1_3_BR2_IDA_TOF3_P50.wiff	SSE1	3639813	XP_718541	1	XP_718458.1	5	5	0.08	8.3		701
MFG1_3 (N-GFP)	MFG1	3643884	XP_714447.2	4738	6281	30898	MFG1_3_BR2_IDA_TOF3_P50	30898_MFG1_3_BR2_IDA_TOF3_P50.wiff	NUP170	3639767	XP_718589	1	XP_718506.1	5	3	0.04	4.1		1426
MFG1_3 (N-GFP)	MFG1	3643884	XP_714447.2	4738	6281	30898	MFG1_3_BR2_IDA_TOF3_P50	30898_MFG1_3_BR2_IDA_TOF3_P50.wiff	KAP123	3639740	XP_718593	1	XP_718510.1	30	17	0.41	20.6		1109
MFG1_3 (N-GFP)	MFG1	3643884	XP_714447.2	4738	6281	30898	MFG1_3_BR2_IDA_TOF3_P50	30898_MFG1_3_BR2_IDA_TOF3_P50.wiff	BMS1	3639801	XP_718605	1	XP_718522.1	8	7	0.11	7.8		1210
MFG1_3 (N-GFP)	MFG1	3643884	XP_714447.2	4738	6281	30898	MFG1_3_BR2_IDA_TOF3_P50	30898_MFG1_3_BR2_IDA_TOF3_P50.wiff	MBF1	3639946	XP_718386	1	XP_718117.1	2	2	0.03	13.2		151
MFG1_3 (N-GFP)	MFG1	3643884	XP_714447.2	4738	6281	30898	MFG1_3_BR2_IDA_TOF3_P50	30898_MFG1_3_BR2_IDA_TOF3_P50.wiff	TIF1	3639917	XP_718416	1	XP_718147.1	53	21	0.71	55.7		397
MFG1_3 (N-GFP)	MFG1	3643884	XP_714447.2	4738	6281	30898	MFG1_3_BR2_IDA_TOF3_P50	30898_MFG1_3_BR2_IDA_TOF3_P50.wiff	RPS2	3639967	XP_718427	1	XP_718157.1	13	7	0.2	34.1		249
MFG1_3 (N-GFP)	MFG1	3643884	XP_714447.2	4738	6281	30898	MFG1_3_BR2_IDA_TOF3_P50	30898_MFG1_3_BR2_IDA_TOF3_P50.wiff	LYS12	3640064	XP_718292	1	XP_718193.1	6	5	0.08	21		376
MFG1_3 (N-GFP)	MFG1	3643884	XP_714447.2	4738	6281	30898	MFG1_3_BR2_IDA_TOF3_P50	30898_MFG1_3_BR2_IDA_TOF3_P50.wiff	MCM6	3639988	XP_718371	1	XP_718276.1	2	2	0.03	3		880
MFG1_3 (N-GFP)	MFG1	3643884	XP_714447.2	4738	6281	30898	MFG1_3_BR2_IDA_TOF3_P50	30898_MFG1_3_BR2_IDA_TOF3_P50.wiff	MET2	3640060	XP_718378	1	XP_718283.1	2	2	0.03	4.6		409
MFG1_3 (N-GFP)	MFG1	3643884	XP_714447.2	4738	6281	30898	MFG1_3_BR2_IDA_TOF3_P50	30898_MFG1_3_BR2_IDA_TOF3_P50.wiff	SNF4	3640264	XP_718103	1	XP_718037.1	2	2	0.03	14.4		167
MFG1_3 (N-GFP)	MFG1	3643884	XP_714447.2	4738	6281	30898	MFG1_3_BR2_IDA_TOF3_P50	30898_MFG1_3_BR2_IDA_TOF3_P50.wiff	ATP3	3640387	XP_717914	1	XP_717849.1	2	2	0.03	15.7		153
MFG1_3 (N-GFP)	MFG1	3643884	XP_714447.2	4738	6281	30898	MFG1_3_BR2_IDA_TOF3_P50	30898_MFG1_3_BR2_IDA_TOF3_P50.wiff	SRP54	3640377	XP_717934	1	XP_717868.1	3	3	0.05	7.2		556
MFG1_3 (N-GFP)	MFG1	3643884	XP_714447.2	4738	6281	30898	MFG1_3_BR2_IDA_TOF3_P50	30898_MFG1_3_BR2_IDA_TOF3_P50.wiff	PWP2	3640416	XP_717966	1	XP_717900.1	2	2	0.03	2.2		922
MFG1_3 (N-GFP)	MFG1	3643884	XP_714447.2	4738	6281	30898	MFG1_3_BR2_IDA_TOF3_P50	30898_MFG1_3_BR2_IDA_TOF3_P50.wiff	PMA1	3640531	XP_717759	1	XP_717665.1	26	12	0.38	18.4		895
MFG1_3 (N-GFP)	MFG1	3643884	XP_714447.2	4738	6281	30898	MFG1_3_BR2_IDA_TOF3_P50	30898_MFG1_3_BR2_IDA_TOF3_P50.wiff	SOF1	3640585	XP_717779	1	XP_717685.1	3	3	0.05	7.1		436
MFG1_3 (N-GFP)	MFG1	3643884	XP_714447.2	4738	6281	30898	MFG1_3_BR2_IDA_TOF3_P50	30898_MFG1_3_BR2_IDA_TOF3_P50.wiff	CAALFM_C300520WA	3640513	XP_717783	1	XP_717689.1	3	2	0.05	12.9		194
MFG1_3 (N-GFP)	MFG1	3643884	XP_714447.2	4738	6281	30898	MFG1_3_BR2_IDA_TOF3_P50	30898_MFG1_3_BR2_IDA_TOF3_P50.wiff	CAALFM_C300450CA	3640548	XP_717792	1	XP_717698.1	22	10	0.32	31.8		368
MFG1_3 (N-GFP)	MFG1	3643884	XP_714447.2	4738	6281	30898	MFG1_3_BR2_IDA_TOF3_P50	30898_MFG1_3_BR2_IDA_TOF3_P50.wiff	RHR2	3640522	XP_717809	1	XP_717715.1	3	3	0.05	16.1		254
MFG1_3 (N-GFP)	MFG1	3643884	XP_714447.2	4738	6281	30898	MFG1_3_BR2_IDA_TOF3_P50	30898_MFG1_3_BR2_IDA_TOF3_P50.wiff	RPT2	3640525	XP_717812	1	XP_717718.1	3	3	0.05	9.2		465
MFG1_3 (N-GFP)	MFG1	3643884	XP_714447.2	4738	6281	30898	MFG1_3_BR2_IDA_TOF3_P50	30898_MFG1_3_BR2_IDA_TOF3_P50.wiff	CAALFM_C300130CA	3640593	XP_717830	1	XP_717736.1	4	3	0.06	5.9		525
MFG1_3 (N-GFP)	MFG1	3643884	XP_714447.2	4738	6281	30898	MFG1_3_BR2_IDA_TOF3_P50	30898_MFG1_3_BR2_IDA_TOF3_P50.wiff	RPS24	3640568	XP_717837	1	XP_717743.1	12	6	0.18	38.5		135
MFG1_3 (N-GFP)	MFG1	3643884	XP_714447.2	4738	6281	30898	MFG1_3_BR2_IDA_TOF3_P50	30898_MFG1_3_BR2_IDA_TOF3_P50.wiff	MRPL3	3640722	XP_717602	1	XP_717528.1	3	3	0.05	9.9		404
MFG1_3 (N-GFP)	MFG1	3643884	XP_714447.2	4738	6281	30898	MFG1_3_BR2_IDA_TOF3_P50	30898_MFG1_3_BR2_IDA_TOF3_P50.wiff	CAALFM_C107950CA	3640724	XP_717604	1	XP_717530.1	2	2	0.03	7.5		266
MFG1_3 (N-GFP)	MFG1	3643884	XP_714447.2	4738	6281	30898	MFG1_3_BR2_IDA_TOF3_P50	30898_MFG1_3_BR2_IDA_TOF3_P50.wiff	DPM1	3640700	XP_717611	1	XP_717537.1	6	6	0.09	28.9		239
MFG1_3 (N-GFP)	MFG1	3643884	XP_714447.2	4738	6281	30898	MFG1_3_BR2_IDA_TOF3_P50	30898_MFG1_3_BR2_IDA_TOF3_P50.wiff	PFY1	3640703	XP_717614	1	XP_717540.1	2	2	0.03	33.3		126
MFG1_3 (N-GFP)	MFG1	3643884	XP_714447.2	4738	6281	30898	MFG1_3_BR2_IDA_TOF3_P50	30898_MFG1_3_BR2_IDA_TOF3_P50.wiff	DRG1	3640714	XP_717620	1	XP_717546.1	15	12	0.23	46.5		368
MFG1_3 (N-GFP)	MFG1	3643884	XP_714447.2	4738	6281	30898	MFG1_3_BR2_IDA_TOF3_P50	30898_MFG1_3_BR2_IDA_TOF3_P50.wiff	CAALFM_C108110WA	3640716	XP_717622	1	XP_717548.1	9	9	0.12	8.7		1091
MFG1_3 (N-GFP)	MFG1	3643884	XP_714447.2	4738	6281	30898	MFG1_3_BR2_IDA_TOF3_P50	30898_MFG1_3_BR2_IDA_TOF3_P50.wiff	TKL1	3640767	XP_717648	1	XP_717574.1	15	11	0.22	25.3		677
MFG1_3 (N-GFP)	MFG1	3643884	XP_714447.2	4738	6281	30898	MFG1_3_BR2_IDA_TOF3_P50	30898_MFG1_3_BR2_IDA_TOF3_P50.wiff	OLE1	3640755	XP_717653	1	XP_717579.1	7	7	0.11	14.6		486
MFG1_3 (N-GFP)	MFG1	3643884	XP_714447.2	4738	6281	30898	MFG1_3_BR2_IDA_TOF3_P50	30898_MFG1_3_BR2_IDA_TOF3_P50.wiff	RPT4	3640859	XP_717434	1	XP_717345.1	8	5	0.09	15.9		428
MFG1_3 (N-GFP)	MFG1	3643884	XP_714447.2	4738	6281	30898	MFG1_3_BR2_IDA_TOF3_P50	30898_MFG1_3_BR2_IDA_TOF3_P50.wiff	MEX67	3640921	XP_717440	1	XP_717351.1	4	4	0.06	7.9		617
MFG1_3 (N-GFP)	MFG1	3643884	XP_714447.2	4738	6281	30898	MFG1_3_BR2_IDA_TOF3_P50	30898_MFG1_3_BR2_IDA_TOF3_P50.wiff	RPL15	3640926	XP_717445	1	XP_717356.1	15	7	0.22	36.3		204
MFG1_3 (N-GFP)	MFG1	3643884	XP_714447.2	4738	6281	30898	MFG1_3_BR2_IDA_TOF3_P50	30898_MFG1_3_BR2_IDA_TOF3_P50.wiff	CAP001	3640882	XP_717457	1	XP_717368.1	4	4	0.06	10.5		545
MFG1_3 (N-GFP)	MFG1	3643884	XP_714447.2	4738	6281	30898	MFG1_3_BR2_IDA_TOF3_P50	30898_MFG1_3_BR2_IDA_TOF3_P50.wiff	CaO19.8143	3640848	XP_717465	1	XP_717375.1	13	12	0.19	15.5		1042
MFG1_3 (N-GFP)	MFG1	3643884	XP_714447.2	4738	6281	30898	MFG1_3_BR2_IDA_TOF3_P50	30898_MFG1_3_BR2_IDA_TOF3_P50.wiff	NHP2	3640872	XP_717481	1	XP_717389.1	36	4	0.54	20.8		159
MFG1_3 (N-GFP)	MFG1	3643884	XP_714447.2	4738	6281	30898	MFG1_3_BR2_IDA_TOF3_P50	30898_MFG1_3_BR2_IDA_TOF3_P50.wiff	SEC26	3640891	XP_717483	1	XP_717391.1	20	17	0.3	21.1		952
MFG1_3 (N-GFP)	MFG1	3643884	XP_714447.2	4738	6281	30898	MFG1_3_BR2_IDA_TOF3_P50	30898_MFG1_3_BR2_IDA_TOF3_P50.wiff	CDC10	3640905	XP_717505	1	XP_717411.1	3	3	0.05	12.9		357
MFG1_3 (N-GFP)	MFG1	3643884	XP_714447.2	4738	6281	30898	MFG1_3_BR2_IDA_TOF3_P50	30898_MFG1_3_BR2_IDA_TOF3_P50.wiff	RPL24	3641073	XP_717269	1	XP_717194.1	23	7	0.35	36.8		155
MFG1_3 (N-GFP)	MFG1	3643884	XP_714447.2	4738	6281	30898	MFG1_3_BR2_IDA_TOF3_P50	30898_MFG1_3_BR2_IDA_TOF3_P50.wiff	MTD1	3641033	XP_717291	1	XP_717215.1	2	2	0.03	8		323
MFG1_3 (N-GFP)	MFG1	3643884	XP_714447.2	4738	6281	30898	MFG1_3_BR2_IDA_TOF3_P50	30898_MFG1_3_BR2_IDA_TOF3_P50.wiff	SSZ1	3641035	XP_717293	1	XP_717217.1	9	6	0.14	13.3		540
MFG1_3 (N-GFP)	MFG1	3643884	XP_714447.2	4738	6281	30898	MFG1_3_BR2_IDA_TOF3_P50	30898_MFG1_3_BR2_IDA_TOF3_P50.wiff	ZDS1	3641058	XP_717304	1	XP_717228.1	29	21	0.42	18.4		1645
MFG1_3 (N-GFP)	MFG1	3643884	XP_714447.2	4738	6281	30898	MFG1_3_BR2_IDA_TOF3_P50	30898_MFG1_3_BR2_IDA_TOF3_P50.wiff	GCN1	3641256	XP_717136	1	XP_717057.1	7	7	0.11	4.6		1600
MFG1_3 (N-GFP)	MFG1	3643884	XP_714447.2	4738	6281	30898	MFG1_3_BR2_IDA_TOF3_P50	30898_MFG1_3_BR2_IDA_TOF3_P50.wiff	TIF11	3641208	XP_717154	1	XP_717075.1	2	2	0.03	13.6		154
MFG1_3 (N-GFP)	MFG1	3643884	XP_714447.2	4738	6281	30898	MFG1_3_BR2_IDA_TOF3_P50	30898_MFG1_3_BR2_IDA_TOF3_P50.wiff	CaO19.5126	3641354	XP_716949	1	XP_716881.1; XP_888936.1	4	2	0.06	12.5		184
MFG1_3 (N-GFP)	MFG1	3643884	XP_714447.2	4738	6281	30898	MFG1_3_BR2_IDA_TOF3_P50	30898_MFG1_3_BR2_IDA_TOF3_P50.wiff	CAALFM_C703270WA	3641365	XP_716951	1	XP_716883.1; XP_888935.1	7	5	0.08	13.4		397
MFG1_3 (N-GFP)	MFG1	3643884	XP_714447.2	4738	6281	30898	MFG1_3_BR2_IDA_TOF3_P50	30898_MFG1_3_BR2_IDA_TOF3_P50.wiff	LMO1	3641403	XP_716970	1	XP_716903.1; XP_888916.1	6	6	0.09	12.3		521
MFG1_3 (N-GFP)	MFG1	3643884	XP_714447.2	4738	6281	30898	MFG1_3_BR2_IDA_TOF3_P50	30898_MFG1_3_BR2_IDA_TOF3_P50.wiff	ERG5	3641400	XP_717000	1	XP_716933.1; XP_888893.1	6	5	0.09	9.9		517
MFG1_3 (N-GFP)	MFG1	3643884	XP_714447.2	4738	6281	30898	MFG1_3_BR2_IDA_TOF3_P50	30898_MFG1_3_BR2_IDA_TOF3_P50.wiff	ERG11	3641508	XP_716822	1		6	6	0.05	12.9		528
MFG1_3 (N-GFP)	MFG1	3643884	XP_714447.2	4738	6281	30898	MFG1_3_BR2_IDA_TOF3_P50	30898_MFG1_3_BR2_IDA_TOF3_P50.wiff	PET9	3641531	XP_716829	1	XP_716769.1	21	10	0.32	35.9		301
MFG1_3 (N-GFP)	MFG1	3643884	XP_714447.2	4738	6281	30898	MFG1_3_BR2_IDA_TOF3_P50	30898_MFG1_3_BR2_IDA_TOF3_P50.wiff	NAM7	3641489	XP_716838	1	XP_716778.1	8	8	0.12	10.3		1019
MFG1_3 (N-GFP)	MFG1	3643884	XP_714447.2	4738	6281	30898	MFG1_3_BR2_IDA_TOF3_P50	30898_MFG1_3_BR2_IDA_TOF3_P50.wiff	SEC14	3641491	XP_716840	1	XP_716780.1	5	5	0.08	18.3		301
MFG1_3 (N-GFP)	MFG1	3643884	XP_714447.2	4738	6281	30898	MFG1_3_BR2_IDA_TOF3_P50	30898_MFG1_3_BR2_IDA_TOF3_P50.wiff	XDJ1	3641478	XP_716852	1	XP_716792.1	3	3	0.04	5.9		439
MFG1_3 (N-GFP)	MFG1	3643884	XP_714447.2	4738	6281	30898	MFG1_3_BR2_IDA_TOF3_P50	30898_MFG1_3_BR2_IDA_TOF3_P50.wiff	CaO19.8591	3641504	XP_716874	1	XP_716814.1	25	20	0.37	38		681
MFG1_3 (N-GFP)	MFG1	3643884	XP_714447.2	4738	6281	30898	MFG1_3_BR2_IDA_TOF3_P50	30898_MFG1_3_BR2_IDA_TOF3_P50.wiff	BDF1	3641493	XP_716876	1	XP_716816.1	3	3	0.05	4.9		732
MFG1_3 (N-GFP)	MFG1	3643884	XP_714447.2	4738	6281	30898	MFG1_3_BR2_IDA_TOF3_P50	30898_MFG1_3_BR2_IDA_TOF3_P50.wiff	FAS1	3641494	XP_716877	1	XP_716817.1	15	15	0.22	9.2		2037
MFG1_3 (N-GFP)	MFG1	3643884	XP_714447.2	4738	6281	30898	MFG1_3_BR2_IDA_TOF3_P50	30898_MFG1_3_BR2_IDA_TOF3_P50.wiff	CAALFM_C601890CA	3641598	XP_716703	1	XP_716643.1	7	5	0.08	11		574
MFG1_3 (N-GFP)	MFG1	3643884	XP_714447.2	4738	6281	30898	MFG1_3_BR2_IDA_TOF3_P50	30898_MFG1_3_BR2_IDA_TOF3_P50.wiff	TIF3	3641646	XP_716731	1	XP_716672.1	12	9	0.16	21.8		455
MFG1_3 (N-GFP)	MFG1	3643884	XP_714447.2	4738	6281	30898	MFG1_3_BR2_IDA_TOF3_P50	30898_MFG1_3_BR2_IDA_TOF3_P50.wiff	ANB1	3641648	XP_716733	1	XP_716674.1	6	4	0.09	26.8		138
MFG1_3 (N-GFP)	MFG1	3643884	XP_714447.2	4738	6281	30898	MFG1_3_BR2_IDA_TOF3_P50	30898_MFG1_3_BR2_IDA_TOF3_P50.wiff	RCT1	3641727	XP_716591	1		2	2	0.03	20.4		191
MFG1_3 (N-GFP)	MFG1	3643884	XP_714447.2	4738	6281	30898	MFG1_3_BR2_IDA_TOF3_P50	30898_MFG1_3_BR2_IDA_TOF3_P50.wiff	CAALFM_C305880CA	3641737	XP_716609	1		4	4	0.06	9.2		510
MFG1_3 (N-GFP)	MFG1	3643884	XP_714447.2	4738	6281	30898	MFG1_3_BR2_IDA_TOF3_P50	30898_MFG1_3_BR2_IDA_TOF3_P50.wiff	CTA4	3641743	XP_716615	1		2	2	0.03	3		1016
MFG1_3 (N-GFP)	MFG1	3643884	XP_714447.2	4738	6281	30898	MFG1_3_BR2_IDA_TOF3_P50	30898_MFG1_3_BR2_IDA_TOF3_P50.wiff	CAM1	3641734	XP_716623	1		4	3	0.04	29.7		101
MFG1_3 (N-GFP)	MFG1	3643884	XP_714447.2	4738	6281	30898	MFG1_3_BR2_IDA_TOF3_P50	30898_MFG1_3_BR2_IDA_TOF3_P50.wiff	NOG1	3641736	XP_716625	1		8	8	0.11	13.4		640
MFG1_3 (N-GFP)	MFG1	3643884	XP_714447.2	4738	6281	30898	MFG1_3_BR2_IDA_TOF3_P50	30898_MFG1_3_BR2_IDA_TOF3_P50.wiff	PBS2	3641748	XP_716629	1		4	4	0.06	9.9		545
MFG1_3 (N-GFP)	MFG1	3643884	XP_714447.2	4738	6281	30898	MFG1_3_BR2_IDA_TOF3_P50	30898_MFG1_3_BR2_IDA_TOF3_P50.wiff	DED1	3641752	XP_716633	1		194	25	2.49	54.2		672
MFG1_3 (N-GFP)	MFG1	3643884	XP_714447.2	4738	6281	30898	MFG1_3_BR2_IDA_TOF3_P50	30898_MFG1_3_BR2_IDA_TOF3_P50.wiff	CaO19.1226	3641798	XP_716534	1	XP_716480.1	5	4	0.06	9.4		531
MFG1_3 (N-GFP)	MFG1	3643884	XP_714447.2	4738	6281	30898	MFG1_3_BR2_IDA_TOF3_P50	30898_MFG1_3_BR2_IDA_TOF3_P50.wiff	CAALFM_C107690CA	3641767	XP_716539	1	XP_716484.1	5	5	0.07	11.5		452
MFG1_3 (N-GFP)	MFG1	3643884	XP_714447.2	4738	6281	30898	MFG1_3_BR2_IDA_TOF3_P50	30898_MFG1_3_BR2_IDA_TOF3_P50.wiff	SEC23	3641818	XP_716562	1	XP_716507.1	2	2	0.03	2.5		762
MFG1_3 (N-GFP)	MFG1	3643884	XP_714447.2	4738	6281	30898	MFG1_3_BR2_IDA_TOF3_P50	30898_MFG1_3_BR2_IDA_TOF3_P50.wiff	CAALFM_CR09110CA	3641929	XP_716441	1		3	2	0.05	7.4		285
MFG1_3 (N-GFP)	MFG1	3643884	XP_714447.2	4738	6281	30898	MFG1_3_BR2_IDA_TOF3_P50	30898_MFG1_3_BR2_IDA_TOF3_P50.wiff	TUB1	3641930	XP_716442	1		19	7	0.26	27.6		323
MFG1_3 (N-GFP)	MFG1	3643884	XP_714447.2	4738	6281	30898	MFG1_3_BR2_IDA_TOF3_P50	30898_MFG1_3_BR2_IDA_TOF3_P50.wiff	ERG13	3641881	XP_716446	1		11	8	0.16	23.1		451
MFG1_3 (N-GFP)	MFG1	3643884	XP_714447.2	4738	6281	30898	MFG1_3_BR2_IDA_TOF3_P50	30898_MFG1_3_BR2_IDA_TOF3_P50.wiff	CAALFM_CR09240CA	3641919	XP_716456	1		7	4	0.07	38.1		147
MFG1_3 (N-GFP)	MFG1	3643884	XP_714447.2	4738	6281	30898	MFG1_3_BR2_IDA_TOF3_P50	30898_MFG1_3_BR2_IDA_TOF3_P50.wiff	PHO88	3641898	XP_716461	1		2	2	0.03	14.1		191
MFG1_3 (N-GFP)	MFG1	3643884	XP_714447.2	4738	6281	30898	MFG1_3_BR2_IDA_TOF3_P50	30898_MFG1_3_BR2_IDA_TOF3_P50.wiff	ELF1	3641903	XP_716466	1		30	20	0.38	21.5		1195
MFG1_3 (N-GFP)	MFG1	3643884	XP_714447.2	4738	6281	30898	MFG1_3_BR2_IDA_TOF3_P50	30898_MFG1_3_BR2_IDA_TOF3_P50.wiff	RPN2	3641945	XP_716391	1	XP_716329.1	10	8	0.15	10.5		952
MFG1_3 (N-GFP)	MFG1	3643884	XP_714447.2	4738	6281	30898	MFG1_3_BR2_IDA_TOF3_P50	30898_MFG1_3_BR2_IDA_TOF3_P50.wiff	SSB1	3642095	XP_716208	1	XP_716124.1	70	23	0.99	51.7		613
MFG1_3 (N-GFP)	MFG1	3643884	XP_714447.2	4738	6281	30898	MFG1_3_BR2_IDA_TOF3_P50	30898_MFG1_3_BR2_IDA_TOF3_P50.wiff	RPS20	3642071	XP_716215	1	XP_716131.1	5	3	0.07	26.9		119
MFG1_3 (N-GFP)	MFG1	3643884	XP_714447.2	4738	6281	30898	MFG1_3_BR2_IDA_TOF3_P50	30898_MFG1_3_BR2_IDA_TOF3_P50.wiff	SKI2	3642143	XP_716263	1	XP_716180.1	2	2	0.03	1.8		1245
MFG1_3 (N-GFP)	MFG1	3643884	XP_714447.2	4738	6281	30898	MFG1_3_BR2_IDA_TOF3_P50	30898_MFG1_3_BR2_IDA_TOF3_P50.wiff	TSA1	3642269	XP_716082	1		11	7	0.17	44.4		196
MFG1_3 (N-GFP)	MFG1	3643884	XP_714447.2	4738	6281	30898	MFG1_3_BR2_IDA_TOF3_P50	30898_MFG1_3_BR2_IDA_TOF3_P50.wiff	CAALFM_C306700CA	3642247	XP_716120	1		6	6	0.09	12.1		613
MFG1_3 (N-GFP)	MFG1	3643884	XP_714447.2	4738	6281	30898	MFG1_3_BR2_IDA_TOF3_P50	30898_MFG1_3_BR2_IDA_TOF3_P50.wiff	KRE30	3642311	XP_716024	1	XP_715966.1	12	10	0.17	19.9		609
MFG1_3 (N-GFP)	MFG1	3643884	XP_714447.2	4738	6281	30898	MFG1_3_BR2_IDA_TOF3_P50	30898_MFG1_3_BR2_IDA_TOF3_P50.wiff	CaO19.8056	3642447	XP_715911	1	XP_715861.1	4	4	0.05	6.7		684
MFG1_3 (N-GFP)	MFG1	3643884	XP_714447.2	4738	6281	30898	MFG1_3_BR2_IDA_TOF3_P50	30898_MFG1_3_BR2_IDA_TOF3_P50.wiff	SRP40	3642538	XP_715840	1	XP_715790.1	22	6	0.31	20.9		378
MFG1_3 (N-GFP)	MFG1	3643884	XP_714447.2	4738	6281	30898	MFG1_3_BR2_IDA_TOF3_P50	30898_MFG1_3_BR2_IDA_TOF3_P50.wiff	SNF1	3642643	XP_715699	1	XP_715642.1	6	6	0.09	14.1		618
MFG1_3 (N-GFP)	MFG1	3643884	XP_714447.2	4738	6281	30898	MFG1_3_BR2_IDA_TOF3_P50	30898_MFG1_3_BR2_IDA_TOF3_P50.wiff	VPS1	3642656	XP_715712	1	XP_715656.1	16	12	0.23	19.5		693
MFG1_3 (N-GFP)	MFG1	3643884	XP_714447.2	4738	6281	30898	MFG1_3_BR2_IDA_TOF3_P50	30898_MFG1_3_BR2_IDA_TOF3_P50.wiff	CAALFM_C501140CA	3642663	XP_715719	1	XP_715662.1	2	2	0.03	3.5		753
MFG1_3 (N-GFP)	MFG1	3643884	XP_714447.2	4738	6281	30898	MFG1_3_BR2_IDA_TOF3_P50	30898_MFG1_3_BR2_IDA_TOF3_P50.wiff	CaO19.10395	3642725	XP_715589	1	XP_715533.1	25	12	0.35	38.1		567
MFG1_3 (N-GFP)	MFG1	3643884	XP_714447.2	4738	6281	30898	MFG1_3_BR2_IDA_TOF3_P50	30898_MFG1_3_BR2_IDA_TOF3_P50.wiff	SPT16	3642741	XP_715596	1	XP_715540.1	2	2	0.03	2.1		1060
MFG1_3 (N-GFP)	MFG1	3643884	XP_714447.2	4738	6281	30898	MFG1_3_BR2_IDA_TOF3_P50	30898_MFG1_3_BR2_IDA_TOF3_P50.wiff	AGO1	3642764	XP_715614	1	XP_715558.1	6	5	0.09	9.9		658
MFG1_3 (N-GFP)	MFG1	3643884	XP_714447.2	4738	6281	30898	MFG1_3_BR2_IDA_TOF3_P50	30898_MFG1_3_BR2_IDA_TOF3_P50.wiff	CaO19.10434	3642767	XP_715626	1	XP_715571.1	6	5	0.09	13.5		526
MFG1_3 (N-GFP)	MFG1	3643884	XP_714447.2	4738	6281	30898	MFG1_3_BR2_IDA_TOF3_P50	30898_MFG1_3_BR2_IDA_TOF3_P50.wiff	RPT5	3642858	XP_715502	1	XP_715432.1	5	4	0.08	9.7		454
MFG1_3 (N-GFP)	MFG1	3643884	XP_714447.2	4738	6281	30898	MFG1_3_BR2_IDA_TOF3_P50	30898_MFG1_3_BR2_IDA_TOF3_P50.wiff	CCT6	3642861	XP_715505	1	XP_715435.1	2	2	0.03	5.4		559
MFG1_3 (N-GFP)	MFG1	3643884	XP_714447.2	4738	6281	30898	MFG1_3_BR2_IDA_TOF3_P50	30898_MFG1_3_BR2_IDA_TOF3_P50.wiff	RVB1	3642864	XP_715508	1	XP_715438.1	5	4	0.06	11.6		458
MFG1_3 (N-GFP)	MFG1	3643884	XP_714447.2	4738	6281	30898	MFG1_3_BR2_IDA_TOF3_P50	30898_MFG1_3_BR2_IDA_TOF3_P50.wiff	CaO19.10642	3642840	XP_715509	1	XP_715439.1	2	2	0.03	7.3		331
MFG1_3 (N-GFP)	MFG1	3643884	XP_714447.2	4738	6281	30898	MFG1_3_BR2_IDA_TOF3_P50	30898_MFG1_3_BR2_IDA_TOF3_P50.wiff	USP1	3642846	XP_715515	1	XP_715445.1	2	2	0.03	5.2		458
MFG1_3 (N-GFP)	MFG1	3643884	XP_714447.2	4738	6281	30898	MFG1_3_BR2_IDA_TOF3_P50	30898_MFG1_3_BR2_IDA_TOF3_P50.wiff	NOP1	3642887	XP_715517	1	XP_715447.1	212	19	3.15	57		316
MFG1_3 (N-GFP)	MFG1	3643884	XP_714447.2	4738	6281	30898	MFG1_3_BR2_IDA_TOF3_P50	30898_MFG1_3_BR2_IDA_TOF3_P50.wiff	SMY2	3642890	XP_715520	1	XP_715450.1	3	3	0.04	5.4		906
MFG1_3 (N-GFP)	MFG1	3643884	XP_714447.2	4738	6281	30898	MFG1_3_BR2_IDA_TOF3_P50	30898_MFG1_3_BR2_IDA_TOF3_P50.wiff	RNR1	3642989	XP_715320	1	XP_715255.1	6	6	0.07	8.1		854
MFG1_3 (N-GFP)	MFG1	3643884	XP_714447.2	4738	6281	30898	MFG1_3_BR2_IDA_TOF3_P50	30898_MFG1_3_BR2_IDA_TOF3_P50.wiff	EFT2	3642998	XP_715329	1	XP_715264.1	27	19	0.41	27.3		830
MFG1_3 (N-GFP)	MFG1	3643884	XP_714447.2	4738	6281	30898	MFG1_3_BR2_IDA_TOF3_P50	30898_MFG1_3_BR2_IDA_TOF3_P50.wiff	IDH2	3642979	XP_715332	1	XP_715267.1	5	3	0.06	17.3		369
MFG1_3 (N-GFP)	MFG1	3643884	XP_714447.2	4738	6281	30898	MFG1_3_BR2_IDA_TOF3_P50	30898_MFG1_3_BR2_IDA_TOF3_P50.wiff	PR26	3642981	XP_715334	1	XP_715269.1	6	3	0.06	11.2		411
MFG1_3 (N-GFP)	MFG1	3643884	XP_714447.2	4738	6281	30898	MFG1_3_BR2_IDA_TOF3_P50	30898_MFG1_3_BR2_IDA_TOF3_P50.wiff	RNR21	3643021	XP_715342	1	XP_715277.1	4	3	0.06	7.7		413
MFG1_3 (N-GFP)	MFG1	3643884	XP_714447.2	4738	6281	30898	MFG1_3_BR2_IDA_TOF3_P50	30898_MFG1_3_BR2_IDA_TOF3_P50.wiff	ALD5	3643026	XP_715347	1	XP_715282.1	6	5	0.07	16.4		499
MFG1_3 (N-GFP)	MFG1	3643884	XP_714447.2	4738	6281	30898	MFG1_3_BR2_IDA_TOF3_P50	30898_MFG1_3_BR2_IDA_TOF3_P50.wiff	SUR2	3642973	XP_715359	1	XP_715294.1	2	2	0.03	6.1		342
MFG1_3 (N-GFP)	MFG1	3643884	XP_714447.2	4738	6281	30898	MFG1_3_BR2_IDA_TOF3_P50	30898_MFG1_3_BR2_IDA_TOF3_P50.wiff	CAALFM_C202770WA	3643031	XP_715369	1	XP_715304.1	17	13	0.23	21.1		717
MFG1_3 (N-GFP)	MFG1	3643884	XP_714447.2	4738	6281	30898	MFG1_3_BR2_IDA_TOF3_P50	30898_MFG1_3_BR2_IDA_TOF3_P50.wiff	CAALFM_C202720WA	3643002	XP_715374	1	XP_715309.1	9	8	0.12	11		1002
MFG1_3 (N-GFP)	MFG1	3643884	XP_714447.2	4738	6281	30898	MFG1_3_BR2_IDA_TOF3_P50	30898_MFG1_3_BR2_IDA_TOF3_P50.wiff	SPT6	3643171	XP_715187	1	XP_889033.1	11	10	0.16	10.3		1401
MFG1_3 (N-GFP)	MFG1	3643884	XP_714447.2	4738	6281	30898	MFG1_3_BR2_IDA_TOF3_P50	30898_MFG1_3_BR2_IDA_TOF3_P50.wiff	SUI3	3643130	XP_715210	1	XP_889016.1	10	8	0.15	36.3		281
MFG1_3 (N-GFP)	MFG1	3643884	XP_714447.2	4738	6281	30898	MFG1_3_BR2_IDA_TOF3_P50	30898_MFG1_3_BR2_IDA_TOF3_P50.wiff	SLA2	3643149	XP_715249	1	XP_888986.1	5	5	0.07	5.5		1063
MFG1_3 (N-GFP)	MFG1	3643884	XP_714447.2	4738	6281	30898	MFG1_3_BR2_IDA_TOF3_P50	30898_MFG1_3_BR2_IDA_TOF3_P50.wiff	MCM2	3643197	XP_715131	1	XP_715080.1	2	2	0.03	2.8		903
MFG1_3 (N-GFP)	MFG1	3643884	XP_714447.2	4738	6281	30898	MFG1_3_BR2_IDA_TOF3_P50	30898_MFG1_3_BR2_IDA_TOF3_P50.wiff	CAALFM_CR03600CA	3643207	XP_715158	1	XP_715107.1	2	2	0.03	15.5		200
MFG1_3 (N-GFP)	MFG1	3643884	XP_714447.2	4738	6281	30898	MFG1_3_BR2_IDA_TOF3_P50	30898_MFG1_3_BR2_IDA_TOF3_P50.wiff	CIT1	3643201	XP_715169	1	XP_715118.1	2	2	0.03	6		397
MFG1_3 (N-GFP)	MFG1	3643884	XP_714447.2	4738	6281	30898	MFG1_3_BR2_IDA_TOF3_P50	30898_MFG1_3_BR2_IDA_TOF3_P50.wiff	CAALFM_C114080WA	3643345	XP_715016	1		6	5	0.08	4		1818
MFG1_3 (N-GFP)	MFG1	3643884	XP_714447.2	4738	6281	30898	MFG1_3_BR2_IDA_TOF3_P50	30898_MFG1_3_BR2_IDA_TOF3_P50.wiff	RPL4B	3643347	XP_715018	1		27	12	0.42	46.6		363
MFG1_3 (N-GFP)	MFG1	3643884	XP_714447.2	4738	6281	30898	MFG1_3_BR2_IDA_TOF3_P50	30898_MFG1_3_BR2_IDA_TOF3_P50.wiff	CAALFM_C114240WA	3643306	XP_715034	1		6	6	0.09	13.7		561
MFG1_3 (N-GFP)	MFG1	3643884	XP_714447.2	4738	6281	30898	MFG1_3_BR2_IDA_TOF3_P50	30898_MFG1_3_BR2_IDA_TOF3_P50.wiff	TIF35	3643308	XP_715036	1		6	5	0.09	22.6		279
MFG1_3 (N-GFP)	MFG1	3643884	XP_714447.2	4738	6281	30898	MFG1_3_BR2_IDA_TOF3_P50	30898_MFG1_3_BR2_IDA_TOF3_P50.wiff	NPL3	3643310	XP_715038	1		305	11	4.61	41.3		286
MFG1_3 (N-GFP)	MFG1	3643884	XP_714447.2	4738	6281	30898	MFG1_3_BR2_IDA_TOF3_P50	30898_MFG1_3_BR2_IDA_TOF3_P50.wiff	RIM101	3643280	XP_715047	1		3	2	0.04	4.7		661
MFG1_3 (N-GFP)	MFG1	3643884	XP_714447.2	4738	6281	30898	MFG1_3_BR2_IDA_TOF3_P50	30898_MFG1_3_BR2_IDA_TOF3_P50.wiff	MRPL10	3643375	XP_714954	1	XP_714891.1	2	2	0.03	6.4		283
MFG1_3 (N-GFP)	MFG1	3643884	XP_714447.2	4738	6281	30898	MFG1_3_BR2_IDA_TOF3_P50	30898_MFG1_3_BR2_IDA_TOF3_P50.wiff	MAK5	3643358	XP_714962	1	XP_714899.1	5	3	0.05	6.8		782
MFG1_3 (N-GFP)	MFG1	3643884	XP_714447.2	4738	6281	30898	MFG1_3_BR2_IDA_TOF3_P50	30898_MFG1_3_BR2_IDA_TOF3_P50.wiff	SUP45	3643359	XP_714963	1	XP_714900.1	17	12	0.25	34.6		436
MFG1_3 (N-GFP)	MFG1	3643884	XP_714447.2	4738	6281	30898	MFG1_3_BR2_IDA_TOF3_P50	30898_MFG1_3_BR2_IDA_TOF3_P50.wiff	NUP133	3643393	XP_714973	1	XP_714911.1	2	2	0.03	2.5		1032
MFG1_3 (N-GFP)	MFG1	3643884	XP_714447.2	4738	6281	30898	MFG1_3_BR2_IDA_TOF3_P50	30898_MFG1_3_BR2_IDA_TOF3_P50.wiff	ERP3	3643400	XP_714980	1	XP_714917.1	3	3	0.05	13.1		213
MFG1_3 (N-GFP)	MFG1	3643884	XP_714447.2	4738	6281	30898	MFG1_3_BR2_IDA_TOF3_P50	30898_MFG1_3_BR2_IDA_TOF3_P50.wiff	ATP4	3643388	XP_715001	1	XP_714938.1	2	2	0.03	12.9		233
MFG1_3 (N-GFP)	MFG1	3643884	XP_714447.2	4738	6281	30898	MFG1_3_BR2_IDA_TOF3_P50	30898_MFG1_3_BR2_IDA_TOF3_P50.wiff	RPL11	3643489	XP_714823	1	XP_714763.1	17	7	0.23	30.1		166
MFG1_3 (N-GFP)	MFG1	3643884	XP_714447.2	4738	6281	30898	MFG1_3_BR2_IDA_TOF3_P50	30898_MFG1_3_BR2_IDA_TOF3_P50.wiff	CAALFM_C207100WA	3643504	XP_714855	1	XP_714793.1	4	4	0.05	11.7		469
MFG1_3 (N-GFP)	MFG1	3643884	XP_714447.2	4738	6281	30898	MFG1_3_BR2_IDA_TOF3_P50	30898_MFG1_3_BR2_IDA_TOF3_P50.wiff	ACH1	3643603	XP_714720	1	XP_714589.1	8	6	0.11	16.8		524
MFG1_3 (N-GFP)	MFG1	3643884	XP_714447.2	4738	6281	30898	MFG1_3_BR2_IDA_TOF3_P50	30898_MFG1_3_BR2_IDA_TOF3_P50.wiff	NAT1	3643641	XP_714733	1	XP_714602.1	6	6	0.09	9.1		782
MFG1_3 (N-GFP)	MFG1	3643884	XP_714447.2	4738	6281	30898	MFG1_3_BR2_IDA_TOF3_P50	30898_MFG1_3_BR2_IDA_TOF3_P50.wiff	CCT7	3643626	XP_714755	1	XP_714622.1	6	5	0.09	12.6		549
MFG1_3 (N-GFP)	MFG1	3643884	XP_714447.2	4738	6281	30898	MFG1_3_BR2_IDA_TOF3_P50	30898_MFG1_3_BR2_IDA_TOF3_P50.wiff	YST1	3643678	XP_714681	1		3	3	0.05	18		217
MFG1_3 (N-GFP)	MFG1	3643884	XP_714447.2	4738	6281	30898	MFG1_3_BR2_IDA_TOF3_P50	30898_MFG1_3_BR2_IDA_TOF3_P50.wiff	DNM1	3643673	XP_714693	1		7	6	0.09	11.7		866
MFG1_3 (N-GFP)	MFG1	3643884	XP_714447.2	4738	6281	30898	MFG1_3_BR2_IDA_TOF3_P50	30898_MFG1_3_BR2_IDA_TOF3_P50.wiff	SUP35	3643722	XP_714648	1	XP_714552.1	8	8	0.12	14.7		721
MFG1_3 (N-GFP)	MFG1	3643884	XP_714447.2	4738	6281	30898	MFG1_3_BR2_IDA_TOF3_P50	30898_MFG1_3_BR2_IDA_TOF3_P50.wiff	SGN11	3643699	XP_714655	1	XP_714561.1	11	5	0.17	39.9		163
MFG1_3 (N-GFP)	MFG1	3643884	XP_714447.2	4738	6281	30898	MFG1_3_BR2_IDA_TOF3_P50	30898_MFG1_3_BR2_IDA_TOF3_P50.wiff	CCT2	3643685	XP_714667	1	XP_714573.1	2	2	0.03	4.9		526
MFG1_3 (N-GFP)	MFG1	3643884	XP_714447.2	4738	6281	30898	MFG1_3_BR2_IDA_TOF3_P50	30898_MFG1_3_BR2_IDA_TOF3_P50.wiff	IPP1	3643838	XP_714485	1	XP_714437.1	3	3	0.04	13.2		288
MFG1_3 (N-GFP)	MFG1	3643884	XP_714447.2	4738	6281	30898	MFG1_3_BR2_IDA_TOF3_P50	30898_MFG1_3_BR2_IDA_TOF3_P50.wiff	RPT6	3643827	XP_714488	1	XP_714440.1	11	8	0.13	28.7		401
MFG1_3 (N-GFP)	MFG1	3643884	XP_714447.2	4738	6281	30898	MFG1_3_BR2_IDA_TOF3_P50	30898_MFG1_3_BR2_IDA_TOF3_P50.wiff	CaO19.11086	3643841	XP_714496	1	XP_714447.1	117	24	1.72	42.5		758
MFG1_3 (N-GFP)	MFG1	3643884	XP_714447.2	4738	6281	30898	MFG1_3_BR2_IDA_TOF3_P50	30898_MFG1_3_BR2_IDA_TOF3_P50.wiff	SET2	3643923	XP_714401	1	XP_714361.1	13	8	0.17	16.4		844
MFG1_3 (N-GFP)	MFG1	3643884	XP_714447.2	4738	6281	30898	MFG1_3_BR2_IDA_TOF3_P50	30898_MFG1_3_BR2_IDA_TOF3_P50.wiff	GPD1	3643924	XP_714402	1	XP_714362.1	4	4	0.06	14.6		403
MFG1_3 (N-GFP)	MFG1	3643884	XP_714447.2	4738	6281	30898	MFG1_3_BR2_IDA_TOF3_P50	30898_MFG1_3_BR2_IDA_TOF3_P50.wiff	CYC1	3643937	XP_714415	1	XP_714375.1	6	6	0.09	33.6		110
MFG1_3 (N-GFP)	MFG1	3643884	XP_714447.2	4738	6281	30898	MFG1_3_BR2_IDA_TOF3_P50	30898_MFG1_3_BR2_IDA_TOF3_P50.wiff	GPX2	3644009	XP_714294	1	XP_714017.1	8	4	0.11	31.3		163
MFG1_3 (N-GFP)	MFG1	3643884	XP_714447.2	4738	6281	30898	MFG1_3_BR2_IDA_TOF3_P50	30898_MFG1_3_BR2_IDA_TOF3_P50.wiff	TOP1	3644034	XP_714305	1	XP_714029.1	4	3	0.04	5		780
MFG1_3 (N-GFP)	MFG1	3643884	XP_714447.2	4738	6281	30898	MFG1_3_BR2_IDA_TOF3_P50	30898_MFG1_3_BR2_IDA_TOF3_P50.wiff	CIC1	3644059	XP_714330	1	XP_714055.1	2	2	0.03	7.7		365
MFG1_3 (N-GFP)	MFG1	3643884	XP_714447.2	4738	6281	30898	MFG1_3_BR2_IDA_TOF3_P50	30898_MFG1_3_BR2_IDA_TOF3_P50.wiff	MET10	3644088	XP_714247	1	XP_714109.1	5	4	0.06	4.9		1094
MFG1_3 (N-GFP)	MFG1	3643884	XP_714447.2	4738	6281	30898	MFG1_3_BR2_IDA_TOF3_P50	30898_MFG1_3_BR2_IDA_TOF3_P50.wiff	SGT1	3644068	XP_714260	1	XP_714122.1	3	3	0.05	8.2		413
MFG1_3 (N-GFP)	MFG1	3643884	XP_714447.2	4738	6281	30898	MFG1_3_BR2_IDA_TOF3_P50	30898_MFG1_3_BR2_IDA_TOF3_P50.wiff	PES1	3644105	XP_714264	1	XP_714126.1	4	4	0.06	7.3		587
MFG1_3 (N-GFP)	MFG1	3643884	XP_714447.2	4738	6281	30898	MFG1_3_BR2_IDA_TOF3_P50	30898_MFG1_3_BR2_IDA_TOF3_P50.wiff	ECM17	3644077	XP_714270	1	XP_714132.1	11	6	0.13	13.5		874
MFG1_3 (N-GFP)	MFG1	3643884	XP_714447.2	4738	6281	30898	MFG1_3_BR2_IDA_TOF3_P50	30898_MFG1_3_BR2_IDA_TOF3_P50.wiff	PMT4	3644096	XP_714280	1	XP_714142.1	2	2	0.03	2.4		755
MFG1_3 (N-GFP)	MFG1	3643884	XP_714447.2	4738	6281	30898	MFG1_3_BR2_IDA_TOF3_P50	30898_MFG1_3_BR2_IDA_TOF3_P50.wiff	RPL8A	3644365	XP_713974	1	XP_713916.1	46	15	0.35	55.7		262
MFG1_3 (N-GFP)	MFG1	3643884	XP_714447.2	4738	6281	30898	MFG1_3_BR2_IDA_TOF3_P50	30898_MFG1_3_BR2_IDA_TOF3_P50.wiff	CaO19.9855	3644340	XP_713982	1	XP_713924.1	11	11	0.17	20.1		672
MFG1_3 (N-GFP)	MFG1	3643884	XP_714447.2	4738	6281	30898	MFG1_3_BR2_IDA_TOF3_P50	30898_MFG1_3_BR2_IDA_TOF3_P50.wiff	CDC48	3644394	XP_714003	1	XP_713945.1	11	10	0.14	17.7		826
MFG1_3 (N-GFP)	MFG1	3643884	XP_714447.2	4738	6281	30898	MFG1_3_BR2_IDA_TOF3_P50	30898_MFG1_3_BR2_IDA_TOF3_P50.wiff	CaO19.9889	3644348	XP_714015	1	XP_713957.1	2	2	0.03	2.4		702
MFG1_3 (N-GFP)	MFG1	3643884	XP_714447.2	4738	6281	30898	MFG1_3_BR2_IDA_TOF3_P50	30898_MFG1_3_BR2_IDA_TOF3_P50.wiff	SAM2	3644506	XP_713829	1	XP_713791.1	4	4	0.06	12.2		385
MFG1_3 (N-GFP)	MFG1	3643884	XP_714447.2	4738	6281	30898	MFG1_3_BR2_IDA_TOF3_P50	30898_MFG1_3_BR2_IDA_TOF3_P50.wiff	KRR1	3644522	XP_713834	1	XP_713795.1	5	5	0.08	14.2		358
MFG1_3 (N-GFP)	MFG1	3643884	XP_714447.2	4738	6281	30898	MFG1_3_BR2_IDA_TOF3_P50	30898_MFG1_3_BR2_IDA_TOF3_P50.wiff	GIN4	3644524	XP_713836	1	XP_713796.1	4	4	0.06	3.3		1349
MFG1_3 (N-GFP)	MFG1	3643884	XP_714447.2	4738	6281	30898	MFG1_3_BR2_IDA_TOF3_P50	30898_MFG1_3_BR2_IDA_TOF3_P50.wiff	GPD2	3644517	XP_713866	1	XP_713824.1	5	4	0.08	13.2		371
MFG1_3 (N-GFP)	MFG1	3643884	XP_714447.2	4738	6281	30898	MFG1_3_BR2_IDA_TOF3_P50	30898_MFG1_3_BR2_IDA_TOF3_P50.wiff	2018-09-07	3644596	XP_713774	1	XP_713740.1	4	4	0.06	6.9		670
MFG1_3 (N-GFP)	MFG1	3643884	XP_714447.2	4738	6281	30898	MFG1_3_BR2_IDA_TOF3_P50	30898_MFG1_3_BR2_IDA_TOF3_P50.wiff	CAALFM_C102240WA	3644597	XP_713775	1	XP_713741.1	7	7	0.11	10.9		875
MFG1_3 (N-GFP)	MFG1	3643884	XP_714447.2	4738	6281	30898	MFG1_3_BR2_IDA_TOF3_P50	30898_MFG1_3_BR2_IDA_TOF3_P50.wiff	FPR3	3644646	XP_713680	1	XP_713635.1	12	8	0.17	23.9		428
MFG1_3 (N-GFP)	MFG1	3643884	XP_714447.2	4738	6281	30898	MFG1_3_BR2_IDA_TOF3_P50	30898_MFG1_3_BR2_IDA_TOF3_P50.wiff	CaO19.8643	3644666	XP_713691	1	XP_713646.1	2	2	0.03	5.1		495
MFG1_3 (N-GFP)	MFG1	3643884	XP_714447.2	4738	6281	30898	MFG1_3_BR2_IDA_TOF3_P50	30898_MFG1_3_BR2_IDA_TOF3_P50.wiff	POR1	3644667	XP_713692	1	XP_713647.1	14	10	0.22	41.8		282
MFG1_3 (N-GFP)	MFG1	3643884	XP_714447.2	4738	6281	30898	MFG1_3_BR2_IDA_TOF3_P50	30898_MFG1_3_BR2_IDA_TOF3_P50.wiff	HTB2	3644635	XP_713701	1	XP_713656.1; XP_712726.1; XP_712689.1	23	5	0.33	39.2		130
MFG1_3 (N-GFP)	MFG1	3643884	XP_714447.2	4738	6281	30898	MFG1_3_BR2_IDA_TOF3_P50	30898_MFG1_3_BR2_IDA_TOF3_P50.wiff	CDC3	3644638	XP_713704	1	XP_713659.1	6	4	0.06	10.1		378
MFG1_3 (N-GFP)	MFG1	3643884	XP_714447.2	4738	6281	30898	MFG1_3_BR2_IDA_TOF3_P50	30898_MFG1_3_BR2_IDA_TOF3_P50.wiff	HHF1	3644647	XP_713708	1	XP_713663.1; XP_711083.1; XP_711039.1	17	5	0.25	49.5		105
MFG1_3 (N-GFP)	MFG1	3643884	XP_714447.2	4738	6281	30898	MFG1_3_BR2_IDA_TOF3_P50	30898_MFG1_3_BR2_IDA_TOF3_P50.wiff	SSA2	3644653	XP_713714	1	XP_713669.1	74	26	0.8	48.8		645
MFG1_3 (N-GFP)	MFG1	3643884	XP_714447.2	4738	6281	30898	MFG1_3_BR2_IDA_TOF3_P50	30898_MFG1_3_BR2_IDA_TOF3_P50.wiff	CaO19.8374	3644733	XP_713599	1	XP_713564.1	3	3	0.05	10.6		396
MFG1_3 (N-GFP)	MFG1	3643884	XP_714447.2	4738	6281	30898	MFG1_3_BR2_IDA_TOF3_P50	30898_MFG1_3_BR2_IDA_TOF3_P50.wiff	SEC21	3644738	XP_713604	1	XP_713569.1	21	18	0.32	24		936
MFG1_3 (N-GFP)	MFG1	3643884	XP_714447.2	4738	6281	30898	MFG1_3_BR2_IDA_TOF3_P50	30898_MFG1_3_BR2_IDA_TOF3_P50.wiff	CBC2	3644742	XP_713608	1	XP_713573.1	12	7	0.18	42		224
MFG1_3 (N-GFP)	MFG1	3643884	XP_714447.2	4738	6281	30898	MFG1_3_BR2_IDA_TOF3_P50	30898_MFG1_3_BR2_IDA_TOF3_P50.wiff	SLB1	3644759	XP_713625	1	XP_713588.1	8	5	0.1	19.8		308
MFG1_3 (N-GFP)	MFG1	3643884	XP_714447.2	4738	6281	30898	MFG1_3_BR2_IDA_TOF3_P50	30898_MFG1_3_BR2_IDA_TOF3_P50.wiff	CDC28	3644820	XP_713525	1	XP_713486.1	3	3	0.05	10.7		317
MFG1_3 (N-GFP)	MFG1	3643884	XP_714447.2	4738	6281	30898	MFG1_3_BR2_IDA_TOF3_P50	30898_MFG1_3_BR2_IDA_TOF3_P50.wiff	CaO19.11370	3644832	XP_713555	1	XP_713514.1; XP_711150.1; XP_711132.1	2	2	0.03	13		200
MFG1_3 (N-GFP)	MFG1	3643884	XP_714447.2	4738	6281	30898	MFG1_3_BR2_IDA_TOF3_P50	30898_MFG1_3_BR2_IDA_TOF3_P50.wiff	HIS4	3644949	XP_713367	1	XP_713320.1	2	2	0.03	2.1		838
MFG1_3 (N-GFP)	MFG1	3643884	XP_714447.2	4738	6281	30898	MFG1_3_BR2_IDA_TOF3_P50	30898_MFG1_3_BR2_IDA_TOF3_P50.wiff	SUB2	3644966	XP_713375	1	XP_713328.1	9	6	0.11	30		290
MFG1_3 (N-GFP)	MFG1	3643884	XP_714447.2	4738	6281	30898	MFG1_3_BR2_IDA_TOF3_P50	30898_MFG1_3_BR2_IDA_TOF3_P50.wiff	ATP2	3644972	XP_713381	1	XP_713334.1	19	13	0.29	41.8		512
MFG1_3 (N-GFP)	MFG1	3643884	XP_714447.2	4738	6281	30898	MFG1_3_BR2_IDA_TOF3_P50	30898_MFG1_3_BR2_IDA_TOF3_P50.wiff	CaO19.13116	3644963	XP_713399	1	XP_713352.1	11	9	0.16	15		811
MFG1_3 (N-GFP)	MFG1	3643884	XP_714447.2	4738	6281	30898	MFG1_3_BR2_IDA_TOF3_P50	30898_MFG1_3_BR2_IDA_TOF3_P50.wiff	CaO19.9922	3645072	XP_713270	1	XP_713219.1	6	4	0.06	16.2		247
MFG1_3 (N-GFP)	MFG1	3643884	XP_714447.2	4738	6281	30898	MFG1_3_BR2_IDA_TOF3_P50	30898_MFG1_3_BR2_IDA_TOF3_P50.wiff	DPS1	3645050	XP_713293	1	XP_713240.1	3	3	0.03	5.7		578
MFG1_3 (N-GFP)	MFG1	3643884	XP_714447.2	4738	6281	30898	MFG1_3_BR2_IDA_TOF3_P50	30898_MFG1_3_BR2_IDA_TOF3_P50.wiff	RCL1	3645157	XP_713189	1	XP_713143.1	2	2	0.03	7.5		371
MFG1_3 (N-GFP)	MFG1	3643884	XP_714447.2	4738	6281	30898	MFG1_3_BR2_IDA_TOF3_P50	30898_MFG1_3_BR2_IDA_TOF3_P50.wiff	CaO19.9452	3645186	XP_713199	1	XP_713153.1	11	9	0.15	16.8		648
MFG1_3 (N-GFP)	MFG1	3643884	XP_714447.2	4738	6281	30898	MFG1_3_BR2_IDA_TOF3_P50	30898_MFG1_3_BR2_IDA_TOF3_P50.wiff	CaO19.9458	3645164	XP_713205	1	XP_713159.1	20	11	0.2	24.6		562
MFG1_3 (N-GFP)	MFG1	3643884	XP_714447.2	4738	6281	30898	MFG1_3_BR2_IDA_TOF3_P50	30898_MFG1_3_BR2_IDA_TOF3_P50.wiff	SVL3	3645295	XP_713042	1	XP_713008.1	5	5	0.08	7.5		976
MFG1_3 (N-GFP)	MFG1	3643884	XP_714447.2	4738	6281	30898	MFG1_3_BR2_IDA_TOF3_P50	30898_MFG1_3_BR2_IDA_TOF3_P50.wiff	GAR1	3645298	XP_713063	1	XP_713031.1	12	3	0.18	22.6		196
MFG1_3 (N-GFP)	MFG1	3643884	XP_714447.2	4738	6281	30898	MFG1_3_BR2_IDA_TOF3_P50	30898_MFG1_3_BR2_IDA_TOF3_P50.wiff	RPN6	3645352	XP_709940	1	XP_712979.1	3	3	0.05	8.5		435
MFG1_3 (N-GFP)	MFG1	3643884	XP_714447.2	4738	6281	30898	MFG1_3_BR2_IDA_TOF3_P50	30898_MFG1_3_BR2_IDA_TOF3_P50.wiff	CAALFM_C101940CA	3645422	XP_712954	1	XP_712860.1	3	3	0.04	30.4		168
MFG1_3 (N-GFP)	MFG1	3643884	XP_714447.2	4738	6281	30898	MFG1_3_BR2_IDA_TOF3_P50	30898_MFG1_3_BR2_IDA_TOF3_P50.wiff	RPL17B	3645439	XP_712916	1	XP_712884.1	9	5	0.14	38.9		185
MFG1_3 (N-GFP)	MFG1	3643884	XP_714447.2	4738	6281	30898	MFG1_3_BR2_IDA_TOF3_P50	30898_MFG1_3_BR2_IDA_TOF3_P50.wiff	CAALFM_C204570WA	3645441	XP_712918	1	XP_712886.1	3	3	0.03	8.2		426
MFG1_3 (N-GFP)	MFG1	3643884	XP_714447.2	4738	6281	30898	MFG1_3_BR2_IDA_TOF3_P50	30898_MFG1_3_BR2_IDA_TOF3_P50.wiff	CAALFM_C204370WA	3645460	XP_712942	1	XP_712909.1	8	8	0.12	28.5		410
MFG1_3 (N-GFP)	MFG1	3643884	XP_714447.2	4738	6281	30898	MFG1_3_BR2_IDA_TOF3_P50	30898_MFG1_3_BR2_IDA_TOF3_P50.wiff	RPS8	3645532	XP_712831	1	XP_712803.1	17	7	0.26	43.2		206
MFG1_3 (N-GFP)	MFG1	3643884	XP_714447.2	4738	6281	30898	MFG1_3_BR2_IDA_TOF3_P50	30898_MFG1_3_BR2_IDA_TOF3_P50.wiff	CaO19.14166	3645536	XP_712835	1	XP_712806.1	14	9	0.21	12.3		983
MFG1_3 (N-GFP)	MFG1	3643884	XP_714447.2	4738	6281	30898	MFG1_3_BR2_IDA_TOF3_P50	30898_MFG1_3_BR2_IDA_TOF3_P50.wiff	CaO19.14175	3645545	XP_712844	1	XP_712815.1	2	2	0.03	5		416
MFG1_3 (N-GFP)	MFG1	3643884	XP_714447.2	4738	6281	30898	MFG1_3_BR2_IDA_TOF3_P50	30898_MFG1_3_BR2_IDA_TOF3_P50.wiff	MKK2	3645548	XP_712847	1	XP_712818.1	2	2	0.03	7.2		446
MFG1_3 (N-GFP)	MFG1	3643884	XP_714447.2	4738	6281	30898	MFG1_3_BR2_IDA_TOF3_P50	30898_MFG1_3_BR2_IDA_TOF3_P50.wiff	RFC1	3645550	XP_712849	1	XP_712820.1	4	4	0.06	7.4		688
MFG1_3 (N-GFP)	MFG1	3643884	XP_714447.2	4738	6281	30898	MFG1_3_BR2_IDA_TOF3_P50	30898_MFG1_3_BR2_IDA_TOF3_P50.wiff	NMD5	3645590	XP_712793	1	XP_712642.1	8	6	0.12	6.1		1017
MFG1_3 (N-GFP)	MFG1	3643884	XP_714447.2	4738	6281	30898	MFG1_3_BR2_IDA_TOF3_P50	30898_MFG1_3_BR2_IDA_TOF3_P50.wiff	CaO19.9898	3645699	XP_712672	1	XP_712652.1	5	4	0.07	12.8		281
MFG1_3 (N-GFP)	MFG1	3643884	XP_714447.2	4738	6281	30898	MFG1_3_BR2_IDA_TOF3_P50	30898_MFG1_3_BR2_IDA_TOF3_P50.wiff	ADE3	3645701	XP_712674	1	XP_712654.1	4	3	0.06	4.9		946
MFG1_3 (N-GFP)	MFG1	3643884	XP_714447.2	4738	6281	30898	MFG1_3_BR2_IDA_TOF3_P50	30898_MFG1_3_BR2_IDA_TOF3_P50.wiff	CAALFM_C209040WA	3645792	XP_712585	1	XP_712556.1	2	2	0.03	11.9		193
MFG1_3 (N-GFP)	MFG1	3643884	XP_714447.2	4738	6281	30898	MFG1_3_BR2_IDA_TOF3_P50	30898_MFG1_3_BR2_IDA_TOF3_P50.wiff	CAALFM_C208910CA	3645798	XP_712600	1		5	5	0.05	13.8		508
MFG1_3 (N-GFP)	MFG1	3643884	XP_714447.2	4738	6281	30898	MFG1_3_BR2_IDA_TOF3_P50	30898_MFG1_3_BR2_IDA_TOF3_P50.wiff	SAR1	3645840	XP_712532	1	XP_712502.1	8	6	0.12	53.3		152
MFG1_3 (N-GFP)	MFG1	3643884	XP_714447.2	4738	6281	30898	MFG1_3_BR2_IDA_TOF3_P50	30898_MFG1_3_BR2_IDA_TOF3_P50.wiff	LSG1	3645841	XP_712533	1	XP_712503.1	5	5	0.07	9.4		684
MFG1_3 (N-GFP)	MFG1	3643884	XP_714447.2	4738	6281	30898	MFG1_3_BR2_IDA_TOF3_P50	30898_MFG1_3_BR2_IDA_TOF3_P50.wiff	RPL1	3645843	XP_712535	1	XP_712505.1	17	9	0.24	41		217
MFG1_3 (N-GFP)	MFG1	3643884	XP_714447.2	4738	6281	30898	MFG1_3_BR2_IDA_TOF3_P50	30898_MFG1_3_BR2_IDA_TOF3_P50.wiff	SEC27	3645845	XP_712537	1	XP_712507.1	15	14	0.21	20.3		939
MFG1_3 (N-GFP)	MFG1	3643884	XP_714447.2	4738	6281	30898	MFG1_3_BR2_IDA_TOF3_P50	30898_MFG1_3_BR2_IDA_TOF3_P50.wiff	HRR25	3645853	XP_712545	1	XP_712515.1	2	2	0.03	4.6		433
MFG1_3 (N-GFP)	MFG1	3643884	XP_714447.2	4738	6281	30898	MFG1_3_BR2_IDA_TOF3_P50	30898_MFG1_3_BR2_IDA_TOF3_P50.wiff	NIP7	3645855	XP_712547	1	XP_712517.1	2	2	0.03	6.5		262
MFG1_3 (N-GFP)	MFG1	3643884	XP_714447.2	4738	6281	30898	MFG1_3_BR2_IDA_TOF3_P50	30898_MFG1_3_BR2_IDA_TOF3_P50.wiff	ASC1	3645907	XP_712478	1	XP_888749.1	3	3	0.05	19		211
MFG1_3 (N-GFP)	MFG1	3643884	XP_714447.2	4738	6281	30898	MFG1_3_BR2_IDA_TOF3_P50	30898_MFG1_3_BR2_IDA_TOF3_P50.wiff	NOP58	3645922	XP_712460	1		85	23	0.66	57.7		515
MFG1_3 (N-GFP)	MFG1	3643884	XP_714447.2	4738	6281	30898	MFG1_3_BR2_IDA_TOF3_P50	30898_MFG1_3_BR2_IDA_TOF3_P50.wiff	NOP5	3646084	XP_712316	1		84	23	0.64	57.6		516
MFG1_3 (N-GFP)	MFG1	3643884	XP_714447.2	4738	6281	30898	MFG1_3_BR2_IDA_TOF3_P50	30898_MFG1_3_BR2_IDA_TOF3_P50.wiff	VMA2	3646206	XP_712174	1	XP_711700.1	24	15	0.37	38.3		512
MFG1_3 (N-GFP)	MFG1	3643884	XP_714447.2	4738	6281	30898	MFG1_3_BR2_IDA_TOF3_P50	30898_MFG1_3_BR2_IDA_TOF3_P50.wiff	HMO1	3646217	XP_712185	1	XP_711711.1	11	6	0.16	39		223
MFG1_3 (N-GFP)	MFG1	3643884	XP_714447.2	4738	6281	30898	MFG1_3_BR2_IDA_TOF3_P50	30898_MFG1_3_BR2_IDA_TOF3_P50.wiff	CaO19.13969	3646220	XP_712188	1	XP_711714.1	2	2	0.03	2.5		759
MFG1_3 (N-GFP)	MFG1	3643884	XP_714447.2	4738	6281	30898	MFG1_3_BR2_IDA_TOF3_P50	30898_MFG1_3_BR2_IDA_TOF3_P50.wiff	ENP2	3646234	XP_712139	1	XP_712114.1; XP_888960.1	6	6	0.08	8.3		750
MFG1_3 (N-GFP)	MFG1	3643884	XP_714447.2	4738	6281	30898	MFG1_3_BR2_IDA_TOF3_P50	30898_MFG1_3_BR2_IDA_TOF3_P50.wiff	DED81	3646227	XP_712154	1	XP_712129.1; XP_888973.1	11	9	0.16	26.6		552
MFG1_3 (N-GFP)	MFG1	3643884	XP_714447.2	4738	6281	30898	MFG1_3_BR2_IDA_TOF3_P50	30898_MFG1_3_BR2_IDA_TOF3_P50.wiff	CAALFM_C703480WA	3646230	XP_712157	1	XP_712132.1; XP_888955.1	7	7	0.11	8.5		1045
MFG1_3 (N-GFP)	MFG1	3643884	XP_714447.2	4738	6281	30898	MFG1_3_BR2_IDA_TOF3_P50	30898_MFG1_3_BR2_IDA_TOF3_P50.wiff	CDC39	3646278	XP_712097	1	XP_712072.1	6	6	0.06	3.7		2016
MFG1_3 (N-GFP)	MFG1	3643884	XP_714447.2	4738	6281	30898	MFG1_3_BR2_IDA_TOF3_P50	30898_MFG1_3_BR2_IDA_TOF3_P50.wiff	CAALFM_C604280WA	3646279	XP_712098	1	XP_712073.1	2	2	0.03	7.4		232
MFG1_3 (N-GFP)	MFG1	3643884	XP_714447.2	4738	6281	30898	MFG1_3_BR2_IDA_TOF3_P50	30898_MFG1_3_BR2_IDA_TOF3_P50.wiff	NOP8	3646290	XP_712104	1	XP_712079.1	5	5	0.08	8.6		690
MFG1_3 (N-GFP)	MFG1	3643884	XP_714447.2	4738	6281	30898	MFG1_3_BR2_IDA_TOF3_P50	30898_MFG1_3_BR2_IDA_TOF3_P50.wiff	FLO8	3646292	XP_712106	1	XP_712082.1	7	6	0.11	7.2		817
MFG1_3 (N-GFP)	MFG1	3643884	XP_714447.2	4738	6281	30898	MFG1_3_BR2_IDA_TOF3_P50	30898_MFG1_3_BR2_IDA_TOF3_P50.wiff	CAM1	3646337	XP_712054	1	XP_712033.1	16	10	0.23	27.9		419
MFG1_3 (N-GFP)	MFG1	3643884	XP_714447.2	4738	6281	30898	MFG1_3_BR2_IDA_TOF3_P50	30898_MFG1_3_BR2_IDA_TOF3_P50.wiff	GCR3	3646476	XP_711904	1	XP_711875.1	26	16	0.39	22.9		886
MFG1_3 (N-GFP)	MFG1	3643884	XP_714447.2	4738	6281	30898	MFG1_3_BR2_IDA_TOF3_P50	30898_MFG1_3_BR2_IDA_TOF3_P50.wiff	ENO1	3646484	XP_711912	1	XP_711883.1	53	16	0.79	55		440
MFG1_3 (N-GFP)	MFG1	3643884	XP_714447.2	4738	6281	30898	MFG1_3_BR2_IDA_TOF3_P50	30898_MFG1_3_BR2_IDA_TOF3_P50.wiff	YPK2	3646471	XP_711916	1	XP_711887.1	5	5	0.08	8.4		712
MFG1_3 (N-GFP)	MFG1	3643884	XP_714447.2	4738	6281	30898	MFG1_3_BR2_IDA_TOF3_P50	30898_MFG1_3_BR2_IDA_TOF3_P50.wiff	CaO19.8030	3646472	XP_711917	1	XP_711888.1	2	2	0.03	11.8		245
MFG1_3 (N-GFP)	MFG1	3643884	XP_714447.2	4738	6281	30898	MFG1_3_BR2_IDA_TOF3_P50	30898_MFG1_3_BR2_IDA_TOF3_P50.wiff	TCP1	3646473	XP_711918	1	XP_711889.1	5	4	0.06	10.8		554
MFG1_3 (N-GFP)	MFG1	3643884	XP_714447.2	4738	6281	30898	MFG1_3_BR2_IDA_TOF3_P50	30898_MFG1_3_BR2_IDA_TOF3_P50.wiff	GCD6	3646459	XP_711924	1	XP_711895.1	3	3	0.05	5.6		732
MFG1_3 (N-GFP)	MFG1	3643884	XP_714447.2	4738	6281	30898	MFG1_3_BR2_IDA_TOF3_P50	30898_MFG1_3_BR2_IDA_TOF3_P50.wiff	SPF1	3646573	XP_711837	1	XP_711815.1	2	2	0.03	1.9		1223
MFG1_3 (N-GFP)	MFG1	3643884	XP_714447.2	4738	6281	30898	MFG1_3_BR2_IDA_TOF3_P50	30898_MFG1_3_BR2_IDA_TOF3_P50.wiff	LSC2	3646604	XP_711801	1	XP_711783.1	4	4	0.06	35.8		120
MFG1_3 (N-GFP)	MFG1	3643884	XP_714447.2	4738	6281	30898	MFG1_3_BR2_IDA_TOF3_P50	30898_MFG1_3_BR2_IDA_TOF3_P50.wiff	CaO19.10294	3646651	XP_711742	1	XP_711720.1	9	9	0.14	12.8		665
MFG1_3 (N-GFP)	MFG1	3643884	XP_714447.2	4738	6281	30898	MFG1_3_BR2_IDA_TOF3_P50	30898_MFG1_3_BR2_IDA_TOF3_P50.wiff	MRPL151	3646771	XP_711650	1	XP_711581.1; XP_710785.1; XP_710772.1	3	3	0.04	15		220
MFG1_3 (N-GFP)	MFG1	3643884	XP_714447.2	4738	6281	30898	MFG1_3_BR2_IDA_TOF3_P50	30898_MFG1_3_BR2_IDA_TOF3_P50.wiff	CaO19.12932	3646902	XP_711493	1	XP_711469.1	13	10	0.16	17.2		778
MFG1_3 (N-GFP)	MFG1	3643884	XP_714447.2	4738	6281	30898	MFG1_3_BR2_IDA_TOF3_P50	30898_MFG1_3_BR2_IDA_TOF3_P50.wiff	GSP1	3646894	XP_711509	1	XP_711485.1	4	3	0.06	13.6		214
MFG1_3 (N-GFP)	MFG1	3643884	XP_714447.2	4738	6281	30898	MFG1_3_BR2_IDA_TOF3_P50	30898_MFG1_3_BR2_IDA_TOF3_P50.wiff	MAK11	3646935	XP_711456	1	XP_711439.1	3	3	0.04	7.9		491
MFG1_3 (N-GFP)	MFG1	3643884	XP_714447.2	4738	6281	30898	MFG1_3_BR2_IDA_TOF3_P50	30898_MFG1_3_BR2_IDA_TOF3_P50.wiff	RPS25B	3646972	XP_711416	1		9	3	0.14	32.4		105
MFG1_3 (N-GFP)	MFG1	3643884	XP_714447.2	4738	6281	30898	MFG1_3_BR2_IDA_TOF3_P50	30898_MFG1_3_BR2_IDA_TOF3_P50.wiff	MDJ1	3646980	XP_711424	1		4	4	0.06	10.2		488
MFG1_3 (N-GFP)	MFG1	3643884	XP_714447.2	4738	6281	30898	MFG1_3_BR2_IDA_TOF3_P50	30898_MFG1_3_BR2_IDA_TOF3_P50.wiff	PGK1	3647038	XP_711371	1	XP_711323.1	12	10	0.18	33.6		417
MFG1_3 (N-GFP)	MFG1	3643884	XP_714447.2	4738	6281	30898	MFG1_3_BR2_IDA_TOF3_P50	30898_MFG1_3_BR2_IDA_TOF3_P50.wiff	CEF3	3647040	XP_711356	1		69	27	0.51	31.5		1050
MFG1_3 (N-GFP)	MFG1	3643884	XP_714447.2	4738	6281	30898	MFG1_3_BR2_IDA_TOF3_P50	30898_MFG1_3_BR2_IDA_TOF3_P50.wiff	CAALFM_CR09520CA	3647103	XP_711309	1		2	2	0.03	2.5		924
MFG1_3 (N-GFP)	MFG1	3643884	XP_714447.2	4738	6281	30898	MFG1_3_BR2_IDA_TOF3_P50	30898_MFG1_3_BR2_IDA_TOF3_P50.wiff	SNL1	3647156	XP_711238	1	XP_711215.1	2	2	0.03	14.6		199
MFG1_3 (N-GFP)	MFG1	3643884	XP_714447.2	4738	6281	30898	MFG1_3_BR2_IDA_TOF3_P50	30898_MFG1_3_BR2_IDA_TOF3_P50.wiff	RPS3	3647287	XP_711114	1	XP_711097.1	24	11	0.36	46.2		251
MFG1_3 (N-GFP)	MFG1	3643884	XP_714447.2	4738	6281	30898	MFG1_3_BR2_IDA_TOF3_P50	30898_MFG1_3_BR2_IDA_TOF3_P50.wiff	YHB2	3647335	XP_711063	1	XP_711049.1	3	3	0.05	9.2		400
MFG1_3 (N-GFP)	MFG1	3643884	XP_714447.2	4738	6281	30898	MFG1_3_BR2_IDA_TOF3_P50	30898_MFG1_3_BR2_IDA_TOF3_P50.wiff	VAC8	3647410	XP_710992	1	XP_710979.1	2	2	0.03	3.9		585
MFG1_3 (N-GFP)	MFG1	3643884	XP_714447.2	4738	6281	30898	MFG1_3_BR2_IDA_TOF3_P50	30898_MFG1_3_BR2_IDA_TOF3_P50.wiff	RFC3	3647429	XP_710962	1	XP_710951.1	2	2	0.03	6.9		361
MFG1_3 (N-GFP)	MFG1	3643884	XP_714447.2	4738	6281	30898	MFG1_3_BR2_IDA_TOF3_P50	30898_MFG1_3_BR2_IDA_TOF3_P50.wiff	CAALFM_C307800CA	3647461	XP_710931	1		2	2	0.03	11.1		207
MFG1_3 (N-GFP)	MFG1	3643884	XP_714447.2	4738	6281	30898	MFG1_3_BR2_IDA_TOF3_P50	30898_MFG1_3_BR2_IDA_TOF3_P50.wiff	SEC61	3647462	XP_710932	1		2	2	0.03	4		479
MFG1_3 (N-GFP)	MFG1	3643884	XP_714447.2	4738	6281	30898	MFG1_3_BR2_IDA_TOF3_P50	30898_MFG1_3_BR2_IDA_TOF3_P50.wiff	SRB1	3647454	XP_710946	1		39	15	0.6	45		362
MFG1_3 (N-GFP)	MFG1	3643884	XP_714447.2	4738	6281	30898	MFG1_3_BR2_IDA_TOF3_P50	30898_MFG1_3_BR2_IDA_TOF3_P50.wiff	CAALFM_C104970WA	3647528	XP_710862	1	XP_710850.1	27	25	0.4	21		1363
MFG1_3 (N-GFP)	MFG1	3643884	XP_714447.2	4738	6281	30898	MFG1_3_BR2_IDA_TOF3_P50	30898_MFG1_3_BR2_IDA_TOF3_P50.wiff	CHC1	3647552	XP_710836	1	XP_710822.1	16	13	0.21	10.6		1671
MFG1_3 (N-GFP)	MFG1	3643884	XP_714447.2	4738	6281	30898	MFG1_3_BR2_IDA_TOF3_P50	30898_MFG1_3_BR2_IDA_TOF3_P50.wiff	RPL23A	3647558	XP_710842	1	XP_710828.1	21	4	0.29	35.7		115
MFG1_3 (N-GFP)	MFG1	3643884	XP_714447.2	4738	6281	30898	MFG1_3_BR2_IDA_TOF3_P50	30898_MFG1_3_BR2_IDA_TOF3_P50.wiff	CaO19.13272	3647585	XP_710816	1	XP_710805.1	5	4	0.06	7.3		714
MFG1_3 (N-GFP)	MFG1	3643884	XP_714447.2	4738	6281	30898	MFG1_3_BR2_IDA_TOF3_P50	30898_MFG1_3_BR2_IDA_TOF3_P50.wiff	CDC54	3647606	XP_710791	1	XP_710778.1	2	2	0.03	2.3		912
MFG1_3 (N-GFP)	MFG1	3643884	XP_714447.2	4738	6281	30898	MFG1_3_BR2_IDA_TOF3_P50	30898_MFG1_3_BR2_IDA_TOF3_P50.wiff	CaO19.11182	3647629	XP_710766	1	XP_710747.1; XP_888881.1	3	2	0.04	9.3		226
MFG1_3 (N-GFP)	MFG1	3643884	XP_714447.2	4738	6281	30898	MFG1_3_BR2_IDA_TOF3_P50	30898_MFG1_3_BR2_IDA_TOF3_P50.wiff	TOM71	3647631	XP_710768	1	XP_710749.1; XP_888879.1	3	2	0.05	3.5		629
MFG1_3 (N-GFP)	MFG1	3643884	XP_714447.2	4738	6281	30898	MFG1_3_BR2_IDA_TOF3_P50	30898_MFG1_3_BR2_IDA_TOF3_P50.wiff	CBF5	3647637	XP_710755	1	XP_710717.1	69	18	1.03	47		479
MFG1_3 (N-GFP)	MFG1	3643884	XP_714447.2	4738	6281	30898	MFG1_3_BR2_IDA_TOF3_P50	30898_MFG1_3_BR2_IDA_TOF3_P50.wiff	CaO19.170	3647691	XP_710707	1	XP_710693.1	24	3	0.37	38.9		112
MFG1_3 (N-GFP)	MFG1	3643884	XP_714447.2	4738	6281	30898	MFG1_3_BR2_IDA_TOF3_P50	30898_MFG1_3_BR2_IDA_TOF3_P50.wiff	DBP2	3647692	XP_710708	1	XP_710694.1	180	21	2.25	42.4		443
MFG1_3 (N-GFP)	MFG1	3643884	XP_714447.2	4738	6281	30898	MFG1_3_BR2_IDA_TOF3_P50	30898_MFG1_3_BR2_IDA_TOF3_P50.wiff	RPL3	3647719	XP_710682	1	XP_710673.1	33	11	0.48	29.6		389
MFG1_3 (N-GFP)	MFG1	3643884	XP_714447.2	4738	6281	30898	MFG1_3_BR2_IDA_TOF3_P50	30898_MFG1_3_BR2_IDA_TOF3_P50.wiff	SCS2	3647818	XP_710574	1	XP_710563.1	5	4	0.07	16.5		369
MFG1_3 (N-GFP)	MFG1	3643884	XP_714447.2	4738	6281	30898	MFG1_3_BR2_IDA_TOF3_P50	30898_MFG1_3_BR2_IDA_TOF3_P50.wiff	CAALFM_C500150CA	3647872	XP_710511	1		10	5	0.14	14		543
MFG1_3 (N-GFP)	MFG1	3643884	XP_714447.2	4738	6281	30898	MFG1_3_BR2_IDA_TOF3_P50	30898_MFG1_3_BR2_IDA_TOF3_P50.wiff	THS1	3647882	XP_710514	1		3	3	0.05	4.5		706
MFG1_3 (N-GFP)	MFG1	3643884	XP_714447.2	4738	6281	30898	MFG1_3_BR2_IDA_TOF3_P50	30898_MFG1_3_BR2_IDA_TOF3_P50.wiff	CAALFM_C500080CA	3647886	XP_710518	1		5	5	0.08	16.7		311
MFG1_3 (N-GFP)	MFG1	3643884	XP_714447.2	4738	6281	30898	MFG1_3_BR2_IDA_TOF3_P50	30898_MFG1_3_BR2_IDA_TOF3_P50.wiff	CAALFM_C500030WA	3647879	XP_710527	1		3	3	0.05	13.4		269
MFG1_3 (N-GFP)	MFG1	3643884	XP_714447.2	4738	6281	30898	MFG1_3_BR2_IDA_TOF3_P50	30898_MFG1_3_BR2_IDA_TOF3_P50.wiff	VID27	3647894	XP_710495	1		5	5	0.08	8.1		745
MFG1_3 (N-GFP)	MFG1	3643884	XP_714447.2	4738	6281	30898	MFG1_3_BR2_IDA_TOF3_P50	30898_MFG1_3_BR2_IDA_TOF3_P50.wiff	HET1	3647897	XP_710498	1		2	2	0.03	17.8		197
MFG1_3 (N-GFP)	MFG1	3643884	XP_714447.2	4738	6281	30898	MFG1_3_BR2_IDA_TOF3_P50	30898_MFG1_3_BR2_IDA_TOF3_P50.wiff	UTP20	3647953	XP_710448	1	XP_710441.1	2	2	0.03	2.3		1197
MFG1_3 (N-GFP)	MFG1	3643884	XP_714447.2	4738	6281	30898	MFG1_3_BR2_IDA_TOF3_P50	30898_MFG1_3_BR2_IDA_TOF3_P50.wiff	STT4	3647963	XP_710433	1	XP_710429.1	4	4	0.06	2.6		1927
MFG1_3 (N-GFP)	MFG1	3643884	XP_714447.2	4738	6281	30898	MFG1_3_BR2_IDA_TOF3_P50	30898_MFG1_3_BR2_IDA_TOF3_P50.wiff	CAALFM_CR07080WA	3647964	XP_710434	1	XP_710430.1	2	2	0.03	12.7		245
MFG1_3 (N-GFP)	MFG1	3643884	XP_714447.2	4738	6281	30898	MFG1_3_BR2_IDA_TOF3_P50	30898_MFG1_3_BR2_IDA_TOF3_P50.wiff	ALS3	3647965	XP_710435	1	XP_710431.1	2	2	0.03	2.8		883
MFG1_3 (N-GFP)	MFG1	3643884	XP_714447.2	4738	6281	30898	MFG1_3_BR2_IDA_TOF3_P50	30898_MFG1_3_BR2_IDA_TOF3_P50.wiff	NOP4	3647980	XP_710417	1	XP_710406.1	3	3	0.05	4.5		741
MFG1_3 (N-GFP)	MFG1	3643884	XP_714447.2	4738	6281	30898	MFG1_3_BR2_IDA_TOF3_P50	30898_MFG1_3_BR2_IDA_TOF3_P50.wiff	SLB2	3648018	XP_710381	1	XP_710374.1	15	10	0.21	40.7		317
MFG1_3 (N-GFP)	MFG1	3643884	XP_714447.2	4738	6281	30898	MFG1_3_BR2_IDA_TOF3_P50	30898_MFG1_3_BR2_IDA_TOF3_P50.wiff	VMA6	3648045	XP_710349	1	XP_710332.1	3	3	0.05	11.5		348
MFG1_3 (N-GFP)	MFG1	3643884	XP_714447.2	4738	6281	30898	MFG1_3_BR2_IDA_TOF3_P50	30898_MFG1_3_BR2_IDA_TOF3_P50.wiff	TRP5	3648087	XP_710312	1		18	17	0.27	31.9		702
MFG1_3 (N-GFP)	MFG1	3643884	XP_714447.2	4738	6281	30898	MFG1_3_BR2_IDA_TOF3_P50	30898_MFG1_3_BR2_IDA_TOF3_P50.wiff	CAALFM_C204870CA	3648111	XP_710282	1		8	7	0.11	6.8		1608
MFG1_3 (N-GFP)	MFG1	3643884	XP_714447.2	4738	6281	30898	MFG1_3_BR2_IDA_TOF3_P50	30898_MFG1_3_BR2_IDA_TOF3_P50.wiff	SPB1	3648174	XP_710229	1	XP_710224.1	6	5	0.09	8.2		853
MFG1_3 (N-GFP)	MFG1	3643884	XP_714447.2	4738	6281	30898	MFG1_3_BR2_IDA_TOF3_P50	30898_MFG1_3_BR2_IDA_TOF3_P50.wiff	VAS1	3648338	XP_710062	1	XP_710060.1	9	7	0.1	10.5		1119
MFG1_3 (N-GFP)	MFG1	3643884	XP_714447.2	4738	6281	30898	MFG1_3_BR2_IDA_TOF3_P50	30898_MFG1_3_BR2_IDA_TOF3_P50.wiff	CaO19.37	3648425	XP_709976	1		3	3	0.05	6.1		478
MFG1_3 (N-GFP)	MFG1	3643884	XP_714447.2	4738	6281	30898	MFG1_3_BR2_IDA_TOF3_P50	30898_MFG1_3_BR2_IDA_TOF3_P50.wiff	CaJ7_0366	3704165	XP_888925	1		5	3	0.08	23.8		105
MFG1_3 (N-GFP)	MFG1	3643884	XP_714447.2	4738	6281	30898	MFG1_3_BR2_IDA_TOF3_P50	30898_MFG1_3_BR2_IDA_TOF3_P50.wiff	C4A	280678	P01030	1		5	3	0.06	2.1		1741
MFG1_3 (N-GFP)	MFG1	3643884	XP_714447.2	4738	6281	30898	MFG1_3_BR2_IDA_TOF3_P50	30898_MFG1_3_BR2_IDA_TOF3_P50.wiff	KNG1	280833	P01044-1	1	Q2KJ62	3	3	0.04	4.7		621
MFG1_3 (N-GFP)	MFG1	3643884	XP_714447.2	4738	6281	30898	MFG1_3_BR2_IDA_TOF3_P50	30898_MFG1_3_BR2_IDA_TOF3_P50.wiff	HBA	512439	P01966	1		11	5	0.16	52.1		142
MFG1_3 (N-GFP)	MFG1	3643884	XP_714447.2	4738	6281	30898	MFG1_3_BR2_IDA_TOF3_P50	30898_MFG1_3_BR2_IDA_TOF3_P50.wiff	ALB	280717	P02769	1	ALBU_BOVIN	3	2	0.03	6.8	0.4052
MFG1_3 (N-GFP)	MFG1	3643884	XP_714447.2	4738	6281	30898	MFG1_3_BR2_IDA_TOF3_P50	30898_MFG1_3_BR2_IDA_TOF3_P50.wiff	KRT1	3848	P04264	1	K2C1_HUMAN	14	11	0.17	19.3		643
MFG1_3 (N-GFP)	MFG1	3643884	XP_714447.2	4738	6281	30898	MFG1_3_BR2_IDA_TOF3_P50	30898_MFG1_3_BR2_IDA_TOF3_P50.wiff	KRT2	3849	P35908	1	K22E_HUMAN	6	5	0.06	7.8	0.3922	645
MFG1_3 (N-GFP)	MFG1	3643884	XP_714447.2	4738	6281	30898	MFG1_3_BR2_IDA_TOF3_P50	30898_MFG1_3_BR2_IDA_TOF3_P50.wiff	KRT9	3857	P35527	1	K1C9_HUMAN	13	9	0.18	16.1		623
MFG1_3 (N-GFP)	MFG1	3643884	XP_714447.2	4738	6281	30898	MFG1_3_BR2_IDA_TOF3_P50	30898_MFG1_3_BR2_IDA_TOF3_P50.wiff	KRT10	3858	P13645	0.9997	K1C10_HUMAN	5	5	0.05	7.3		593
MFG1_3 (N-GFP)	MFG1	3643884	XP_714447.2	4738	6281	30898	MFG1_3_BR2_IDA_TOF3_P50	30898_MFG1_3_BR2_IDA_TOF3_P50.wiff	KRT15	101117682	K1C15_SHEEP	0.9847		6	4	0.05	7.9		453
MFG1_3 (N-GFP)	MFG1	3643884	XP_714447.2	4738	6281	30898	MFG1_3_BR2_IDA_TOF3_P50	30898_MFG1_3_BR2_IDA_TOF3_P50.wiff	C5	512045	Q1A7A4	1		6	5	0.08	4		1677
MFG1_3 (N-GFP)	MFG1	3643884	XP_714447.2	4738	6281	30898	MFG1_3_BR2_IDA_TOF3_P50	30898_MFG1_3_BR2_IDA_TOF3_P50.wiff	LOC788610	788610	Q3SX09	1		9	6	0.13	37.8		201
MFG1_3 (N-GFP)	MFG1	3643884	XP_714447.2	4738	6281	30898	MFG1_3_BR2_IDA_TOF3_P50	30898_MFG1_3_BR2_IDA_TOF3_P50.wiff	DBP3	3634868	XP_723554	1	XP_723365.1	37	19	0.4	43.6		564
MFG1_3 (N-GFP)	MFG1	3643884	XP_714447.2	4738	6281	30898	MFG1_3_BR2_IDA_TOF3_P50	30898_MFG1_3_BR2_IDA_TOF3_P50.wiff	CLA4	3634878	XP_723573	1	XP_723385.1	4	3	0.05	4.4		976
MFG1_3 (N-GFP)	MFG1	3643884	XP_714447.2	4738	6281	30898	MFG1_3_BR2_IDA_TOF3_P50	30898_MFG1_3_BR2_IDA_TOF3_P50.wiff	ARF2	3635271	XP_723175	1	XP_723028.1	5	4	0.08	28.7		181
MFG1_3 (N-GFP)	MFG1	3643884	XP_714447.2	4738	6281	30898	MFG1_3_BR2_IDA_TOF3_P50	30898_MFG1_3_BR2_IDA_TOF3_P50.wiff	RPL20B	3635615	XP_722704	1		21	9	0.3	50.6		172
MFG1_3 (N-GFP)	MFG1	3643884	XP_714447.2	4738	6281	30898	MFG1_3_BR2_IDA_TOF3_P50	30898_MFG1_3_BR2_IDA_TOF3_P50.wiff	UTP22	3635760	XP_722611	1	XP_722470.1	7	7	0.09	6.7		1175
MFG1_3 (N-GFP)	MFG1	3643884	XP_714447.2	4738	6281	30898	MFG1_3_BR2_IDA_TOF3_P50	30898_MFG1_3_BR2_IDA_TOF3_P50.wiff	KEM1	3636022	XP_722291	1		17	15	0.26	11.8		1469
MFG1_3 (N-GFP)	MFG1	3643884	XP_714447.2	4738	6281	30898	MFG1_3_BR2_IDA_TOF3_P50	30898_MFG1_3_BR2_IDA_TOF3_P50.wiff	ADH1	3636387	XP_722066	1		17	12	0.25	28.7		435
MFG1_3 (N-GFP)	MFG1	3643884	XP_714447.2	4738	6281	30898	MFG1_3_BR2_IDA_TOF3_P50	30898_MFG1_3_BR2_IDA_TOF3_P50.wiff	MNT1	3636585	XP_721742	1	XP_721623.1	2	2	0.03	5.8		431
MFG1_3 (N-GFP)	MFG1	3643884	XP_714447.2	4738	6281	30898	MFG1_3_BR2_IDA_TOF3_P50	30898_MFG1_3_BR2_IDA_TOF3_P50.wiff	CDC53	3636603	XP_721751	1	XP_721632.1	2	2	0.03	2.9		752
MFG1_3 (N-GFP)	MFG1	3643884	XP_714447.2	4738	6281	30898	MFG1_3_BR2_IDA_TOF3_P50	30898_MFG1_3_BR2_IDA_TOF3_P50.wiff	CAALFM_C503170CA	3637801	XP_720654	1		4	4	0.05	5		814
MFG1_3 (N-GFP)	MFG1	3643884	XP_714447.2	4738	6281	30898	MFG1_3_BR2_IDA_TOF3_P50	30898_MFG1_3_BR2_IDA_TOF3_P50.wiff	CHA2	3638689	XP_719575	1		3	2	0.05	8.2		353
MFG1_3 (N-GFP)	MFG1	3643884	XP_714447.2	4738	6281	30898	MFG1_3_BR2_IDA_TOF3_P50	30898_MFG1_3_BR2_IDA_TOF3_P50.wiff	HXT63	3638770	XP_719596	1	XP_719469.1	10	6	0.09	13.3		550
MFG1_3 (N-GFP)	MFG1	3643884	XP_714447.2	4738	6281	30898	MFG1_3_BR2_IDA_TOF3_P50	30898_MFG1_3_BR2_IDA_TOF3_P50.wiff	HGT7	3638876	XP_719472	1		9	5	0.08	11.9		546
MFG1_3 (N-GFP)	MFG1	3643884	XP_714447.2	4738	6281	30898	MFG1_3_BR2_IDA_TOF3_P50	30898_MFG1_3_BR2_IDA_TOF3_P50.wiff	ARO8	3638828	XP_719544	1		11	9	0.16	23.4		491
MFG1_3 (N-GFP)	MFG1	3643884	XP_714447.2	4738	6281	30898	MFG1_3_BR2_IDA_TOF3_P50	30898_MFG1_3_BR2_IDA_TOF3_P50.wiff	AHA1	3638933	XP_719364	1		10	6	0.14	18.5		346
MFG1_3 (N-GFP)	MFG1	3643884	XP_714447.2	4738	6281	30898	MFG1_3_BR2_IDA_TOF3_P50	30898_MFG1_3_BR2_IDA_TOF3_P50.wiff	RPS23	3639647	XP_718756	1		3	3	0.05	20		145
MFG1_3 (N-GFP)	MFG1	3643884	XP_714447.2	4738	6281	30898	MFG1_3_BR2_IDA_TOF3_P50	30898_MFG1_3_BR2_IDA_TOF3_P50.wiff	FUN12	3640713	XP_717619	1	XP_717545.1	32	20	0.41	24.6		1017
MFG1_3 (N-GFP)	MFG1	3643884	XP_714447.2	4738	6281	30898	MFG1_3_BR2_IDA_TOF3_P50	30898_MFG1_3_BR2_IDA_TOF3_P50.wiff	TEF3	3640757	XP_717655	1	XP_717581.1; XP_711899.1; XP_711870.1	174	15	2.62	39.7		458
MFG1_3 (N-GFP)	MFG1	3643884	XP_714447.2	4738	6281	30898	MFG1_3_BR2_IDA_TOF3_P50	30898_MFG1_3_BR2_IDA_TOF3_P50.wiff	YDJ1	3640883	XP_717458	1		13	8	0.18	26.5		393
MFG1_3 (N-GFP)	MFG1	3643884	XP_714447.2	4738	6281	30898	MFG1_3_BR2_IDA_TOF3_P50	30898_MFG1_3_BR2_IDA_TOF3_P50.wiff	CaO19.5328	3641202	XP_717131	1	XP_717052.1	8	7	0.1	11.7		677
MFG1_3 (N-GFP)	MFG1	3643884	XP_714447.2	4738	6281	30898	MFG1_3_BR2_IDA_TOF3_P50	30898_MFG1_3_BR2_IDA_TOF3_P50.wiff	RPS4A	3641247	XP_717144	1	XP_717065.1	50	14	0.73	54.6		262
MFG1_3 (N-GFP)	MFG1	3643884	XP_714447.2	4738	6281	30898	MFG1_3_BR2_IDA_TOF3_P50	30898_MFG1_3_BR2_IDA_TOF3_P50.wiff	THR1	3641572	XP_716762	1		5	5	0.08	20.4		357
MFG1_3 (N-GFP)	MFG1	3643884	XP_714447.2	4738	6281	30898	MFG1_3_BR2_IDA_TOF3_P50	30898_MFG1_3_BR2_IDA_TOF3_P50.wiff	CaO19.8815	3641863	XP_716483	1		3	3	0.05	8.6		534
MFG1_3 (N-GFP)	MFG1	3643884	XP_714447.2	4738	6281	30898	MFG1_3_BR2_IDA_TOF3_P50	30898_MFG1_3_BR2_IDA_TOF3_P50.wiff	HSP104	3642228	XP_716146	1		9	9	0.13	11.9		899
MFG1_3 (N-GFP)	MFG1	3643884	XP_714447.2	4738	6281	30898	MFG1_3_BR2_IDA_TOF3_P50	30898_MFG1_3_BR2_IDA_TOF3_P50.wiff	NSA2	3642259	XP_716088	1		8	6	0.12	21.8		261
MFG1_3 (N-GFP)	MFG1	3643884	XP_714447.2	4738	6281	30898	MFG1_3_BR2_IDA_TOF3_P50	30898_MFG1_3_BR2_IDA_TOF3_P50.wiff	PHM7	3642329	XP_716011	1		2	2	0.03	3.1		927
MFG1_3 (N-GFP)	MFG1	3643884	XP_714447.2	4738	6281	30898	MFG1_3_BR2_IDA_TOF3_P50	30898_MFG1_3_BR2_IDA_TOF3_P50.wiff	RPT1	3642412	XP_715926	1	XP_715876.1	10	9	0.12	22.1		444
MFG1_3 (N-GFP)	MFG1	3643884	XP_714447.2	4738	6281	30898	MFG1_3_BR2_IDA_TOF3_P50	30898_MFG1_3_BR2_IDA_TOF3_P50.wiff	UBI3	3642848	XP_715467	1	XP_715397.1	9	5	0.14	26.4		193
MFG1_3 (N-GFP)	MFG1	3643884	XP_714447.2	4738	6281	30898	MFG1_3_BR2_IDA_TOF3_P50	30898_MFG1_3_BR2_IDA_TOF3_P50.wiff	CDC19	3643409	XP_714997	1	XP_714934.1	30	13	0.41	32.1		504
MFG1_3 (N-GFP)	MFG1	3643884	XP_714447.2	4738	6281	30898	MFG1_3_BR2_IDA_TOF3_P50	30898_MFG1_3_BR2_IDA_TOF3_P50.wiff	TIF4631	3643880	XP_714443	1		29	18	0.31	25.6		1084
MFG1_3 (N-GFP)	MFG1	3643884	XP_714447.2	4738	6281	30898	MFG1_3_BR2_IDA_TOF3_P50	30898_MFG1_3_BR2_IDA_TOF3_P50.wiff	CAALFM_C500790CA	3644125	XP_714209	1		2	2	0.03	4.2		698
MFG1_3 (N-GFP)	MFG1	3643884	XP_714447.2	4738	6281	30898	MFG1_3_BR2_IDA_TOF3_P50	30898_MFG1_3_BR2_IDA_TOF3_P50.wiff	GGC1	3644497	XP_713859	1		7	5	0.08	25		304
MFG1_3 (N-GFP)	MFG1	3643884	XP_714447.2	4738	6281	30898	MFG1_3_BR2_IDA_TOF3_P50	30898_MFG1_3_BR2_IDA_TOF3_P50.wiff	ACS2	3644652	XP_713713	1	XP_713668.1	10	9	0.13	15.6		671
MFG1_3 (N-GFP)	MFG1	3643884	XP_714447.2	4738	6281	30898	MFG1_3_BR2_IDA_TOF3_P50	30898_MFG1_3_BR2_IDA_TOF3_P50.wiff	RGD2	3645250	XP_713112	1	XP_713089.1	5	5	0.07	6.3		879
MFG1_3 (N-GFP)	MFG1	3643884	XP_714447.2	4738	6281	30898	MFG1_3_BR2_IDA_TOF3_P50	30898_MFG1_3_BR2_IDA_TOF3_P50.wiff	GAD1	3645291	XP_713052	1		11	10	0.14	24.5		568
MFG1_3 (N-GFP)	MFG1	3643884	XP_714447.2	4738	6281	30898	MFG1_3_BR2_IDA_TOF3_P50	30898_MFG1_3_BR2_IDA_TOF3_P50.wiff	LYS22	3645466	XP_712932	1	XP_712900.1	12	7	0.15	24		417
MFG1_3 (N-GFP)	MFG1	3643884	XP_714447.2	4738	6281	30898	MFG1_3_BR2_IDA_TOF3_P50	30898_MFG1_3_BR2_IDA_TOF3_P50.wiff	URA2	3645711	XP_712670	1		52	43	0.74	23.3		2216
MFG1_3 (N-GFP)	MFG1	3643884	XP_714447.2	4738	6281	30898	MFG1_3_BR2_IDA_TOF3_P50	30898_MFG1_3_BR2_IDA_TOF3_P50.wiff	GAG1	3645713	XP_712681	1	XP_712685.1; XP_712661.1; XP_712665.1; XP_710114.1	4	2	0.05	9.3		324
MFG1_3 (N-GFP)	MFG1	3643884	XP_714447.2	4738	6281	30898	MFG1_3_BR2_IDA_TOF3_P50	30898_MFG1_3_BR2_IDA_TOF3_P50.wiff	CaO19.6837	3646139	XP_712225	1	XP_712195.1	3	2	0.03	13.4		261
MFG1_3 (N-GFP)	MFG1	3643884	XP_714447.2	4738	6281	30898	MFG1_3_BR2_IDA_TOF3_P50	30898_MFG1_3_BR2_IDA_TOF3_P50.wiff	ATP1	3646134	XP_712242	1		22	13	0.32	33.6		447
MFG1_3 (N-GFP)	MFG1	3643884	XP_714447.2	4738	6281	30898	MFG1_3_BR2_IDA_TOF3_P50	30898_MFG1_3_BR2_IDA_TOF3_P50.wiff	CAALFM_C604290WA	3646280	XP_712099	1		8	5	0.12	12.1		622
MFG1_3 (N-GFP)	MFG1	3643884	XP_714447.2	4738	6281	30898	MFG1_3_BR2_IDA_TOF3_P50	30898_MFG1_3_BR2_IDA_TOF3_P50.wiff	RPG1	3646756	XP_711631	1		23	20	0.33	25.4		930
MFG1_3 (N-GFP)	MFG1	3643884	XP_714447.2	4738	6281	30898	MFG1_3_BR2_IDA_TOF3_P50	30898_MFG1_3_BR2_IDA_TOF3_P50.wiff	CAALFM_C112760WA	3646817	XP_711564	1		3	3	0.04	9.3		321
MFG1_3 (N-GFP)	MFG1	3643884	XP_714447.2	4738	6281	30898	MFG1_3_BR2_IDA_TOF3_P50	30898_MFG1_3_BR2_IDA_TOF3_P50.wiff	GLC7	3647257	XP_711142	1	XP_711124.1	4	3	0.06	16.1		330
MFG1_3 (N-GFP)	MFG1	3643884	XP_714447.2	4738	6281	30898	MFG1_3_BR2_IDA_TOF3_P50	30898_MFG1_3_BR2_IDA_TOF3_P50.wiff	CaO19.11188	3647328	XP_711056	1	XP_711043.1	3	3	0.05	5.9		606
MFG1_3 (N-GFP)	MFG1	3643884	XP_714447.2	4738	6281	30898	MFG1_3_BR2_IDA_TOF3_P50	30898_MFG1_3_BR2_IDA_TOF3_P50.wiff	RPA190	3647643	XP_710761	1	XP_710723.1	11	10	0.15	9.1		1665
MFG1_3 (N-GFP)	MFG1	3643884	XP_714447.2	4738	6281	30898	MFG1_3_BR2_IDA_TOF3_P50	30898_MFG1_3_BR2_IDA_TOF3_P50.wiff	CRP1	3634826	XP_723470	0.9999	XP_723281.1	3	2	0.03	3		1197
MFG1_3 (N-GFP)	MFG1	3643884	XP_714447.2	4738	6281	30898	MFG1_3_BR2_IDA_TOF3_P50	30898_MFG1_3_BR2_IDA_TOF3_P50.wiff	FAS2	3635222	XP_723161	0.9999	XP_723014.1	3	2	0.03	3.8		905
MFG1_3 (N-GFP)	MFG1	3643884	XP_714447.2	4738	6281	30898	MFG1_3_BR2_IDA_TOF3_P50	30898_MFG1_3_BR2_IDA_TOF3_P50.wiff	CAALFM_C202090WA	3635854	XP_722569	0.9999	XP_722431.1	2	2	0.03	5.5		398
MFG1_3 (N-GFP)	MFG1	3643884	XP_714447.2	4738	6281	30898	MFG1_3_BR2_IDA_TOF3_P50	30898_MFG1_3_BR2_IDA_TOF3_P50.wiff	APM1	3636342	XP_722105	0.9999	XP_721944.1	2	2	0.03	4.8		438
MFG1_3 (N-GFP)	MFG1	3643884	XP_714447.2	4738	6281	30898	MFG1_3_BR2_IDA_TOF3_P50	30898_MFG1_3_BR2_IDA_TOF3_P50.wiff	CAALFM_C307420WA	3638485	XP_719845	0.9999	XP_719728.1	2	2	0.03	4.3		328
MFG1_3 (N-GFP)	MFG1	3643884	XP_714447.2	4738	6281	30898	MFG1_3_BR2_IDA_TOF3_P50	30898_MFG1_3_BR2_IDA_TOF3_P50.wiff	ZCF39	3639037	XP_719345	0.9999		2	2	0.03	5.6		681
MFG1_3 (N-GFP)	MFG1	3643884	XP_714447.2	4738	6281	30898	MFG1_3_BR2_IDA_TOF3_P50	30898_MFG1_3_BR2_IDA_TOF3_P50.wiff	MDH1	3639667	XP_718638	0.9999		2	2	0.03	9.5		337
MFG1_3 (N-GFP)	MFG1	3643884	XP_714447.2	4738	6281	30898	MFG1_3_BR2_IDA_TOF3_P50	30898_MFG1_3_BR2_IDA_TOF3_P50.wiff	PBP2	3640267	XP_718106	0.9999	XP_718039.1	2	2	0.03	4.7		529
MFG1_3 (N-GFP)	MFG1	3643884	XP_714447.2	4738	6281	30898	MFG1_3_BR2_IDA_TOF3_P50	30898_MFG1_3_BR2_IDA_TOF3_P50.wiff	BOI2	3640404	XP_717921	0.9999	XP_717855.1	2	2	0.03	3		1172
MFG1_3 (N-GFP)	MFG1	3643884	XP_714447.2	4738	6281	30898	MFG1_3_BR2_IDA_TOF3_P50	30898_MFG1_3_BR2_IDA_TOF3_P50.wiff	GLO3	3640556	XP_717817	0.9999	XP_717723.1	2	2	0.03	6.7		451
MFG1_3 (N-GFP)	MFG1	3643884	XP_714447.2	4738	6281	30898	MFG1_3_BR2_IDA_TOF3_P50	30898_MFG1_3_BR2_IDA_TOF3_P50.wiff	CAALFM_C210700CA	3641207	XP_717153	0.9999	XP_717074.1	2	2	0.03	8.6		290
MFG1_3 (N-GFP)	MFG1	3643884	XP_714447.2	4738	6281	30898	MFG1_3_BR2_IDA_TOF3_P50	30898_MFG1_3_BR2_IDA_TOF3_P50.wiff	CaO19.12711	3641989	XP_716377	0.9999	XP_716315.1	2	2	0.03	4.6		388
MFG1_3 (N-GFP)	MFG1	3643884	XP_714447.2	4738	6281	30898	MFG1_3_BR2_IDA_TOF3_P50	30898_MFG1_3_BR2_IDA_TOF3_P50.wiff	CaO19.10603	3642852	XP_715471	0.9999	XP_715401.1	2	2	0.03	1.9		1432
MFG1_3 (N-GFP)	MFG1	3643884	XP_714447.2	4738	6281	30898	MFG1_3_BR2_IDA_TOF3_P50	30898_MFG1_3_BR2_IDA_TOF3_P50.wiff	CCT5	3643478	XP_714877	0.9999	XP_714815.1	2	2	0.03	3.5		548
MFG1_3 (N-GFP)	MFG1	3643884	XP_714447.2	4738	6281	30898	MFG1_3_BR2_IDA_TOF3_P50	30898_MFG1_3_BR2_IDA_TOF3_P50.wiff	CaO19.14163	3645533	XP_712832	0.9999	XP_712804.1	3	3	0.03	5.1		607
MFG1_3 (N-GFP)	MFG1	3643884	XP_714447.2	4738	6281	30898	MFG1_3_BR2_IDA_TOF3_P50	30898_MFG1_3_BR2_IDA_TOF3_P50.wiff	ECM32	3646609	XP_711793	0.9999	XP_711775.1	2	2	0.03	2.2		1105
MFG1_3 (N-GFP)	MFG1	3643884	XP_714447.2	4738	6281	30898	MFG1_3_BR2_IDA_TOF3_P50	30898_MFG1_3_BR2_IDA_TOF3_P50.wiff			Q9U6Y5	0.9998	GFP_AEQVI	2	2	0.03	7.6	1	249
MFG1_3 (N-GFP)	MFG1	3643884	XP_714447.2	4738	6281	30898	MFG1_3_BR2_IDA_TOF3_P50	30898_MFG1_3_BR2_IDA_TOF3_P50.wiff	COX2	802565	NP_075030	0.9998	YP_006460255.1	2	2	0.03	10.3		262
MFG1_3 (N-GFP)	MFG1	3643884	XP_714447.2	4738	6281	30898	MFG1_3_BR2_IDA_TOF3_P50	30898_MFG1_3_BR2_IDA_TOF3_P50.wiff	CAALFM_C109710CA	3634818	XP_723521	0.9998	XP_723331.1	2	2	0.03	5.5		527
MFG1_3 (N-GFP)	MFG1	3643884	XP_714447.2	4738	6281	30898	MFG1_3_BR2_IDA_TOF3_P50	30898_MFG1_3_BR2_IDA_TOF3_P50.wiff	CaO19.8433	3637234	XP_721059	0.9998	XP_720937.1	3	2	0.03	4		692
MFG1_3 (N-GFP)	MFG1	3643884	XP_714447.2	4738	6281	30898	MFG1_3_BR2_IDA_TOF3_P50	30898_MFG1_3_BR2_IDA_TOF3_P50.wiff	CAALFM_CR08440WA	3642132	XP_716252	0.9998	XP_716169.1	2	2	0.03	3.6		617
MFG1_3 (N-GFP)	MFG1	3643884	XP_714447.2	4738	6281	30898	MFG1_3_BR2_IDA_TOF3_P50	30898_MFG1_3_BR2_IDA_TOF3_P50.wiff	RRP9	3642509	XP_715811	0.9998	XP_715761.1	2	2	0.03	3.8		549
MFG1_3 (N-GFP)	MFG1	3643884	XP_714447.2	4738	6281	30898	MFG1_3_BR2_IDA_TOF3_P50	30898_MFG1_3_BR2_IDA_TOF3_P50.wiff	CaO19.11052	3643402	XP_714990	0.9998	XP_714927.1	2	2	0.03	4.1		518
MFG1_3 (N-GFP)	MFG1	3643884	XP_714447.2	4738	6281	30898	MFG1_3_BR2_IDA_TOF3_P50	30898_MFG1_3_BR2_IDA_TOF3_P50.wiff	HTA2	3644634	XP_713700	0.9998	XP_713655.1	5	3	0.05	35.9		131
MFG1_3 (N-GFP)	MFG1	3643884	XP_714447.2	4738	6281	30898	MFG1_3_BR2_IDA_TOF3_P50	30898_MFG1_3_BR2_IDA_TOF3_P50.wiff	HTA1	3645658	XP_712725	0.9998	XP_712688.1	5	3	0.05	34.8		132
MFG1_3 (N-GFP)	MFG1	3643884	XP_714447.2	4738	6281	30898	MFG1_3_BR2_IDA_TOF3_P50	30898_MFG1_3_BR2_IDA_TOF3_P50.wiff	JSN1	3637600	XP_720698	0.9997	XP_720570.1	2	2	0.02	4.5		492
MFG1_3 (N-GFP)	MFG1	3643884	XP_714447.2	4738	6281	30898	MFG1_3_BR2_IDA_TOF3_P50	30898_MFG1_3_BR2_IDA_TOF3_P50.wiff	CAALFM_C704200CA	3643122	XP_715202	0.9997	XP_889023.1	2	2	0.03	1.9		1025
MFG1_3 (N-GFP)	MFG1	3643884	XP_714447.2	4738	6281	30898	MFG1_3_BR2_IDA_TOF3_P50	30898_MFG1_3_BR2_IDA_TOF3_P50.wiff	NEP1	3644526	XP_713838	0.9997	XP_713798.1	2	2	0.02	8.2		267
MFG1_3 (N-GFP)	MFG1	3643884	XP_714447.2	4738	6281	30898	MFG1_3_BR2_IDA_TOF3_P50	30898_MFG1_3_BR2_IDA_TOF3_P50.wiff	SSF1	3647085	XP_711291	0.9997		2	2	0.02	5.3		377
MFG1_3 (N-GFP)	MFG1	3643884	XP_714447.2	4738	6281	30898	MFG1_3_BR2_IDA_TOF3_P50	30898_MFG1_3_BR2_IDA_TOF3_P50.wiff	CaO19.11703	3637622	XP_720665	0.9994	XP_720538.1	2	2	0.03	6.7		327
MFG1_3 (N-GFP)	MFG1	3643884	XP_714447.2	4738	6281	30898	MFG1_3_BR2_IDA_TOF3_P50	30898_MFG1_3_BR2_IDA_TOF3_P50.wiff	NOP2	3640912	XP_717453	0.9988	XP_717364.1	2	2	0.03	2.8		618
MFG1_3 (N-GFP)	MFG1	3643884	XP_714447.2	4738	6281	30898	MFG1_3_BR2_IDA_TOF3_P50	30898_MFG1_3_BR2_IDA_TOF3_P50.wiff	RPC40	3643382	XP_714986	0.9982	XP_714923.1	2	2	0.03	4.6		369
MFG1_3 (N-GFP)	MFG1	3643884	XP_714447.2	4738	6281	30898	MFG1_3_BR2_IDA_TOF3_P50	30898_MFG1_3_BR2_IDA_TOF3_P50.wiff	LAT1	3636986	XP_721397	0.9981	XP_720884.1; XP_888786.1	3	2	0.02	4		477
MFG1_3 (N-GFP)	MFG1	3643884	XP_714447.2	4738	6281	30898	MFG1_3_BR2_IDA_TOF3_P50	30898_MFG1_3_BR2_IDA_TOF3_P50.wiff	PDB1	3641186	XP_717098	0.9981	XP_717018.1	3	2	0.02	11.1		379
MFG1_3 (N-GFP)	MFG1	3643884	XP_714447.2	4738	6281	30898	MFG1_3_BR2_IDA_TOF3_P50	30898_MFG1_3_BR2_IDA_TOF3_P50.wiff	CaO19.11272	3641076	XP_717272	0.9979	XP_717197.1	2	2	0.02	4.4		457
MFG1_3 (N-GFP)	MFG1	3643884	XP_714447.2	4738	6281	30898	MFG1_3_BR2_IDA_TOF3_P50	30898_MFG1_3_BR2_IDA_TOF3_P50.wiff	CAALFM_C703370CA	3646720	XP_711678	0.9975	XP_711660.1; XP_888946.1	2	2	0.02	8		364
MFG1_3 (N-GFP)	MFG1	3643884	XP_714447.2	4738	6281	30898	MFG1_3_BR2_IDA_TOF3_P50	30898_MFG1_3_BR2_IDA_TOF3_P50.wiff	LSC1	3639941	XP_718448	0.9974	XP_718181.1	2	2	0.02	6.8		323
MFG1_3 (N-GFP)	MFG1	3643884	XP_714447.2	4738	6281	30898	MFG1_3_BR2_IDA_TOF3_P50	30898_MFG1_3_BR2_IDA_TOF3_P50.wiff	CAALFM_C703660CA	3646226	XP_712153	0.9972	XP_712128.1; XP_888972.1	3	2	0.02	5.6		691
MFG1_3 (N-GFP)	MFG1	3643884	XP_714447.2	4738	6281	30898	MFG1_3_BR2_IDA_TOF3_P50	30898_MFG1_3_BR2_IDA_TOF3_P50.wiff	NOP12	3637230	XP_721055	0.9971	XP_720933.1	2	2	0.02	5.1		454
MFG1_3 (N-GFP)	MFG1	3643884	XP_714447.2	4738	6281	30898	MFG1_3_BR2_IDA_TOF3_P50	30898_MFG1_3_BR2_IDA_TOF3_P50.wiff	CAALFM_C203020CA	3643019	XP_715340	0.9969	XP_715275.1	2	2	0.02	4.2		686
MFG1_3 (N-GFP)	MFG1	3643884	XP_714447.2	4738	6281	30898	MFG1_3_BR2_IDA_TOF3_P50	30898_MFG1_3_BR2_IDA_TOF3_P50.wiff	TFP1	3636703	XP_721638	0.9969		2	2	0.02	4		577
MFG1_3 (N-GFP)	MFG1	3643884	XP_714447.2	4738	6281	30898	MFG1_3_BR2_IDA_TOF3_P50	30898_MFG1_3_BR2_IDA_TOF3_P50.wiff	CaO19.10985	3645858	XP_712550	0.9967	XP_712520.1	2	2	0.02	3.4		555
MFG1_3 (N-GFP)	MFG1	3643884	XP_714447.2	4738	6281	30898	MFG1_3_BR2_IDA_TOF3_P50	30898_MFG1_3_BR2_IDA_TOF3_P50.wiff	CBP1	3641920	XP_716457	0.9965		3	2	0.03	7.2		489
MFG1_3 (N-GFP)	MFG1	3643884	XP_714447.2	4738	6281	30898	MFG1_3_BR2_IDA_TOF3_P50	30898_MFG1_3_BR2_IDA_TOF3_P50.wiff	ENP1	3647861	XP_710535	0.9963	XP_888976.1	2	2	0.03	4.4		475
MFG1_3 (N-GFP)	MFG1	3643884	XP_714447.2	4738	6281	30898	MFG1_3_BR2_IDA_TOF3_P50	30898_MFG1_3_BR2_IDA_TOF3_P50.wiff	CAALFM_C205850CA	3647472	XP_710917	0.986	XP_710902.1	2	2	0.02	2.3		771
MFG1_3 (N-GFP)	MFG1	3643884	XP_714447.2	4738	6281	30898	MFG1_3_BR2_IDA_TOF3_P50	30898_MFG1_3_BR2_IDA_TOF3_P50.wiff	SDS24	3640756	XP_717654	0.9834	XP_717580.1	5	2	0.06	5.6		628
MFG1_3 (N-GFP)	MFG1	3643884	XP_714447.2	4738	6281	30898	MFG1_3_BR2_IDA_TOF3_P50	30898_MFG1_3_BR2_IDA_TOF3_P50.wiff	CAALFM_C307630CA	3638491	XP_719825	0.9677	XP_719708.1	2	2	0.02	5.7		332
MFG1_3 (N-GFP)	MFG1	3643884	XP_714447.2	4738	6281	30898	MFG1_3_BR2_IDA_TOF3_P50	30898_MFG1_3_BR2_IDA_TOF3_P50.wiff	CAALFM_C104620WA	3646135	XP_712243	0.9524	XP_712213.1	2	2	0.02	4.2		576
MFG1_3 (N-GFP)	MFG1	3643884	XP_714447.2	4738	6280	30890	MFG1_3_BR1_IDA_TOF3_P50	30890_MFG1_3_BR1_IDA_TOF3_P50_Wrong.wiff			ENSEMBL:ENSBTAP00000018574	1		2	2	0.02	4.8	1	496
MFG1_3 (N-GFP)	MFG1	3643884	XP_714447.2	4738	6280	30890	MFG1_3_BR1_IDA_TOF3_P50	30890_MFG1_3_BR1_IDA_TOF3_P50_Wrong.wiff			ENSEMBL:ENSBTAP00000024146	1		25	21	0.31	18.6	1	1477
MFG1_3 (N-GFP)	MFG1	3643884	XP_714447.2	4738	6280	30890	MFG1_3_BR1_IDA_TOF3_P50	30890_MFG1_3_BR1_IDA_TOF3_P50_Wrong.wiff			ENSEMBL:ENSBTAP00000024462	1	ENSEMBL:ENSBTAP00000024466	3	3	0.03	10	1	419
MFG1_3 (N-GFP)	MFG1	3643884	XP_714447.2	4738	6280	30890	MFG1_3_BR1_IDA_TOF3_P50	30890_MFG1_3_BR1_IDA_TOF3_P50_Wrong.wiff			P00761	1	TRYP_PIG	17	3	0.2	16.5	1	231
MFG1_3 (N-GFP)	MFG1	3643884	XP_714447.2	4738	6280	30890	MFG1_3_BR1_IDA_TOF3_P50	30890_MFG1_3_BR1_IDA_TOF3_P50_Wrong.wiff	AHSG	280988	P12763	1		2	2	0.02	7.2		359
MFG1_3 (N-GFP)	MFG1	3643884	XP_714447.2	4738	6280	30890	MFG1_3_BR1_IDA_TOF3_P50	30890_MFG1_3_BR1_IDA_TOF3_P50_Wrong.wiff	APOA1	281631	P15497	1		16	12	0.2	48.7		265
MFG1_3 (N-GFP)	MFG1	3643884	XP_714447.2	4738	6280	30890	MFG1_3_BR1_IDA_TOF3_P50	30890_MFG1_3_BR1_IDA_TOF3_P50_Wrong.wiff			Q1RMK2	1		3	2	0.03	5	1	597
MFG1_3 (N-GFP)	MFG1	3643884	XP_714447.2	4738	6280	30890	MFG1_3_BR1_IDA_TOF3_P50	30890_MFG1_3_BR1_IDA_TOF3_P50_Wrong.wiff	C3	280677	Q2UVX4	1		19	12	0.22	10.8		1662
MFG1_3 (N-GFP)	MFG1	3643884	XP_714447.2	4738	6280	30890	MFG1_3_BR1_IDA_TOF3_P50	30890_MFG1_3_BR1_IDA_TOF3_P50_Wrong.wiff	CFB	514076	Q3KUS7	1		2	2	0.02	2.9		760
MFG1_3 (N-GFP)	MFG1	3643884	XP_714447.2	4738	6280	30890	MFG1_3_BR1_IDA_TOF3_P50	30890_MFG1_3_BR1_IDA_TOF3_P50_Wrong.wiff	C9	526766	Q3MHN2	1		2	2	0.02	4.4		548
MFG1_3 (N-GFP)	MFG1	3643884	XP_714447.2	4738	6280	30890	MFG1_3_BR1_IDA_TOF3_P50	30890_MFG1_3_BR1_IDA_TOF3_P50_Wrong.wiff	ITIH4	513700	Q3T052	1		4	4	0.05	5.8		916
MFG1_3 (N-GFP)	MFG1	3643884	XP_714447.2	4738	6280	30890	MFG1_3_BR1_IDA_TOF3_P50	30890_MFG1_3_BR1_IDA_TOF3_P50_Wrong.wiff			Q9U6Y5	1	GFP_AEQVI	2	2	0.02	7.6	1	249
MFG1_3 (N-GFP)	MFG1	3643884	XP_714447.2	4738	6280	30890	MFG1_3_BR1_IDA_TOF3_P50	30890_MFG1_3_BR1_IDA_TOF3_P50_Wrong.wiff	CAALFM_CR06060WA	6335358	XP_441044	1	XP_713526.1	3	2	0.03	10.9		257
MFG1_3 (N-GFP)	MFG1	3643884	XP_714447.2	4738	6280	30890	MFG1_3_BR1_IDA_TOF3_P50	30890_MFG1_3_BR1_IDA_TOF3_P50_Wrong.wiff	RPL7	6335362	XP_441054	1	XP_713533.1	15	8	0.18	29.5		295
MFG1_3 (N-GFP)	MFG1	3643884	XP_714447.2	4738	6280	30890	MFG1_3_BR1_IDA_TOF3_P50	30890_MFG1_3_BR1_IDA_TOF3_P50_Wrong.wiff	MSS116	3634792	XP_723426	1	XP_723235.1	11	11	0.14	22.2		668
MFG1_3 (N-GFP)	MFG1	3643884	XP_714447.2	4738	6280	30890	MFG1_3_BR1_IDA_TOF3_P50	30890_MFG1_3_BR1_IDA_TOF3_P50_Wrong.wiff	COX5	3634768	XP_723445	1	XP_723256.1	5	5	0.06	34.5		165
MFG1_3 (N-GFP)	MFG1	3643884	XP_714447.2	4738	6280	30890	MFG1_3_BR1_IDA_TOF3_P50	30890_MFG1_3_BR1_IDA_TOF3_P50_Wrong.wiff	CAALFM_C109360CA	3634807	XP_723484	1	XP_723294.1	3	2	0.03	4.7		958
MFG1_3 (N-GFP)	MFG1	3643884	XP_714447.2	4738	6280	30890	MFG1_3_BR1_IDA_TOF3_P50	30890_MFG1_3_BR1_IDA_TOF3_P50_Wrong.wiff	YTM1	3634765	XP_723501	1	XP_723311.1	28	15	0.33	43.6		466
MFG1_3 (N-GFP)	MFG1	3643884	XP_714447.2	4738	6280	30890	MFG1_3_BR1_IDA_TOF3_P50	30890_MFG1_3_BR1_IDA_TOF3_P50_Wrong.wiff	IDH1	3634893	XP_723512	1	XP_723322.1	5	4	0.06	21.8		193
MFG1_3 (N-GFP)	MFG1	3643884	XP_714447.2	4738	6280	30890	MFG1_3_BR1_IDA_TOF3_P50	30890_MFG1_3_BR1_IDA_TOF3_P50_Wrong.wiff	CAALFM_C109710CA	3634818	XP_723521	1	XP_723331.1	5	5	0.06	11.4		527
MFG1_3 (N-GFP)	MFG1	3643884	XP_714447.2	4738	6280	30890	MFG1_3_BR1_IDA_TOF3_P50	30890_MFG1_3_BR1_IDA_TOF3_P50_Wrong.wiff	CAALFM_C109790CA	3634843	XP_723530	1	XP_723340.1	2	2	0.02	7.3		381
MFG1_3 (N-GFP)	MFG1	3643884	XP_714447.2	4738	6280	30890	MFG1_3_BR1_IDA_TOF3_P50	30890_MFG1_3_BR1_IDA_TOF3_P50_Wrong.wiff	DBP3	3634868	XP_723554	1	XP_723365.1	41	16	0.36	38.1		564
MFG1_3 (N-GFP)	MFG1	3643884	XP_714447.2	4738	6280	30890	MFG1_3_BR1_IDA_TOF3_P50	30890_MFG1_3_BR1_IDA_TOF3_P50_Wrong.wiff	MIR1	3634782	XP_723568	1	XP_723379.1	9	6	0.11	25.1		307
MFG1_3 (N-GFP)	MFG1	3643884	XP_714447.2	4738	6280	30890	MFG1_3_BR1_IDA_TOF3_P50	30890_MFG1_3_BR1_IDA_TOF3_P50_Wrong.wiff	CAALFM_C110190WA	3634785	XP_723571	1	XP_723383.1	5	3	0.06	18.4		277
MFG1_3 (N-GFP)	MFG1	3643884	XP_714447.2	4738	6280	30890	MFG1_3_BR1_IDA_TOF3_P50	30890_MFG1_3_BR1_IDA_TOF3_P50_Wrong.wiff	RPA34	3634883	XP_723578	1	XP_723390.1	7	4	0.08	19.6		240
MFG1_3 (N-GFP)	MFG1	3643884	XP_714447.2	4738	6280	30890	MFG1_3_BR1_IDA_TOF3_P50	30890_MFG1_3_BR1_IDA_TOF3_P50_Wrong.wiff	SBP1	3635280	XP_723070	1	XP_722924.1	9	6	0.11	19.9		282
MFG1_3 (N-GFP)	MFG1	3643884	XP_714447.2	4738	6280	30890	MFG1_3_BR1_IDA_TOF3_P50	30890_MFG1_3_BR1_IDA_TOF3_P50_Wrong.wiff	EGD2	3635284	XP_723074	1	XP_722928.1	2	2	0.02	16.9		178
MFG1_3 (N-GFP)	MFG1	3643884	XP_714447.2	4738	6280	30890	MFG1_3_BR1_IDA_TOF3_P50	30890_MFG1_3_BR1_IDA_TOF3_P50_Wrong.wiff	CAALFM_C304370CA	3635172	XP_723100	1	XP_722953.1	20	17	0.25	15.6		1120
MFG1_3 (N-GFP)	MFG1	3643884	XP_714447.2	4738	6280	30890	MFG1_3_BR1_IDA_TOF3_P50	30890_MFG1_3_BR1_IDA_TOF3_P50_Wrong.wiff	CAALFM_C304380CA	3635173	XP_723101	1	XP_722954.1	25	4	0.29	38.9		126
MFG1_3 (N-GFP)	MFG1	3643884	XP_714447.2	4738	6280	30890	MFG1_3_BR1_IDA_TOF3_P50	30890_MFG1_3_BR1_IDA_TOF3_P50_Wrong.wiff	RPL19A	3635257	XP_723118	1	XP_722971.1	10	5	0.11	40		115
MFG1_3 (N-GFP)	MFG1	3643884	XP_714447.2	4738	6280	30890	MFG1_3_BR1_IDA_TOF3_P50	30890_MFG1_3_BR1_IDA_TOF3_P50_Wrong.wiff	CAALFM_C304540CA	3635262	XP_723123	1	XP_722976.1	3	3	0.04	4.1		759
MFG1_3 (N-GFP)	MFG1	3643884	XP_714447.2	4738	6280	30890	MFG1_3_BR1_IDA_TOF3_P50	30890_MFG1_3_BR1_IDA_TOF3_P50_Wrong.wiff	MAK21	3635147	XP_723125	1	XP_722978.1	8	5	0.09	6.2		1066
MFG1_3 (N-GFP)	MFG1	3643884	XP_714447.2	4738	6280	30890	MFG1_3_BR1_IDA_TOF3_P50	30890_MFG1_3_BR1_IDA_TOF3_P50_Wrong.wiff	RPS15	3635194	XP_723139	1	XP_722992.1	9	2	0.11	27.8		115
MFG1_3 (N-GFP)	MFG1	3643884	XP_714447.2	4738	6280	30890	MFG1_3_BR1_IDA_TOF3_P50	30890_MFG1_3_BR1_IDA_TOF3_P50_Wrong.wiff	FAS2	3635223	XP_723162	1	XP_723015.1	4	4	0.05	7.6		804
MFG1_3 (N-GFP)	MFG1	3643884	XP_714447.2	4738	6280	30890	MFG1_3_BR1_IDA_TOF3_P50	30890_MFG1_3_BR1_IDA_TOF3_P50_Wrong.wiff	NOP14	3635266	XP_723170	1	XP_723023.1	4	3	0.04	5.2		842
MFG1_3 (N-GFP)	MFG1	3643884	XP_714447.2	4738	6280	30890	MFG1_3_BR1_IDA_TOF3_P50	30890_MFG1_3_BR1_IDA_TOF3_P50_Wrong.wiff	RPL18	3635156	XP_723193	1	XP_723046.1	21	5	0.25	34.4		154
MFG1_3 (N-GFP)	MFG1	3643884	XP_714447.2	4738	6280	30890	MFG1_3_BR1_IDA_TOF3_P50	30890_MFG1_3_BR1_IDA_TOF3_P50_Wrong.wiff	CAALFM_C305150WA	3635162	XP_723199	1	XP_723052.1	4	4	0.05	10.7		475
MFG1_3 (N-GFP)	MFG1	3643884	XP_714447.2	4738	6280	30890	MFG1_3_BR1_IDA_TOF3_P50	30890_MFG1_3_BR1_IDA_TOF3_P50_Wrong.wiff	CAALFM_C305160CA	3635229	XP_723201	1	XP_723054.1	17	15	0.2	21.1		908
MFG1_3 (N-GFP)	MFG1	3643884	XP_714447.2	4738	6280	30890	MFG1_3_BR1_IDA_TOF3_P50	30890_MFG1_3_BR1_IDA_TOF3_P50_Wrong.wiff	RPL8B	3635198	XP_723211	1	XP_723064.1	60	17	0.39	59.9		262
MFG1_3 (N-GFP)	MFG1	3643884	XP_714447.2	4738	6280	30890	MFG1_3_BR1_IDA_TOF3_P50	30890_MFG1_3_BR1_IDA_TOF3_P50_Wrong.wiff	BFR1	3635540	XP_722778	1	XP_722633.1	8	7	0.09	18		462
MFG1_3 (N-GFP)	MFG1	3643884	XP_714447.2	4738	6280	30890	MFG1_3_BR1_IDA_TOF3_P50	30890_MFG1_3_BR1_IDA_TOF3_P50_Wrong.wiff	CaO19.12032	3635543	XP_722781	1	XP_722636.1	39	16	0.44	48.5		371
MFG1_3 (N-GFP)	MFG1	3643884	XP_714447.2	4738	6280	30890	MFG1_3_BR1_IDA_TOF3_P50	30890_MFG1_3_BR1_IDA_TOF3_P50_Wrong.wiff	HGH1	3635519	XP_722804	1	XP_722659.1	2	2	0.02	4.7		362
MFG1_3 (N-GFP)	MFG1	3643884	XP_714447.2	4738	6280	30890	MFG1_3_BR1_IDA_TOF3_P50	30890_MFG1_3_BR1_IDA_TOF3_P50_Wrong.wiff	FBA1	3635548	XP_722836	1	XP_722690.1	16	9	0.17	46.8		359
MFG1_3 (N-GFP)	MFG1	3643884	XP_714447.2	4738	6280	30890	MFG1_3_BR1_IDA_TOF3_P50	30890_MFG1_3_BR1_IDA_TOF3_P50_Wrong.wiff	NIP1	3635435	XP_722853	1	XP_722707.1	31	24	0.36	31.1		874
MFG1_3 (N-GFP)	MFG1	3643884	XP_714447.2	4738	6280	30890	MFG1_3_BR1_IDA_TOF3_P50	30890_MFG1_3_BR1_IDA_TOF3_P50_Wrong.wiff	PWP1	3635456	XP_722858	1	XP_722712.1	7	7	0.09	13.9		612
MFG1_3 (N-GFP)	MFG1	3643884	XP_714447.2	4738	6280	30890	MFG1_3_BR1_IDA_TOF3_P50	30890_MFG1_3_BR1_IDA_TOF3_P50_Wrong.wiff	BEM1	3635460	XP_722862	1	XP_722716.1	2	2	0.02	4.9		630
MFG1_3 (N-GFP)	MFG1	3643884	XP_714447.2	4738	6280	30890	MFG1_3_BR1_IDA_TOF3_P50	30890_MFG1_3_BR1_IDA_TOF3_P50_Wrong.wiff	RPS6	3635476	XP_722877	1	XP_722731.1	11	4	0.14	25.4		205
MFG1_3 (N-GFP)	MFG1	3643884	XP_714447.2	4738	6280	30890	MFG1_3_BR1_IDA_TOF3_P50	30890_MFG1_3_BR1_IDA_TOF3_P50_Wrong.wiff	SPT5	3635847	XP_722503	1	XP_722364.1	22	17	0.25	22.6		956
MFG1_3 (N-GFP)	MFG1	3643884	XP_714447.2	4738	6280	30890	MFG1_3_BR1_IDA_TOF3_P50	30890_MFG1_3_BR1_IDA_TOF3_P50_Wrong.wiff	RPS26A	3635787	XP_722520	1	XP_722381.1	11	4	0.14	27.7		119
MFG1_3 (N-GFP)	MFG1	3643884	XP_714447.2	4738	6280	30890	MFG1_3_BR1_IDA_TOF3_P50	30890_MFG1_3_BR1_IDA_TOF3_P50_Wrong.wiff	SNF2	3635855	XP_722570	1	XP_722432.1	2	2	0.02	1.5		1690
MFG1_3 (N-GFP)	MFG1	3643884	XP_714447.2	4738	6280	30890	MFG1_3_BR1_IDA_TOF3_P50	30890_MFG1_3_BR1_IDA_TOF3_P50_Wrong.wiff	UTP21	3635757	XP_722608	1	XP_722467.1	3	3	0.03	3.6		942
MFG1_3 (N-GFP)	MFG1	3643884	XP_714447.2	4738	6280	30890	MFG1_3_BR1_IDA_TOF3_P50	30890_MFG1_3_BR1_IDA_TOF3_P50_Wrong.wiff	UTP22	3635760	XP_722611	1	XP_722470.1	14	11	0.15	12.3		1175
MFG1_3 (N-GFP)	MFG1	3643884	XP_714447.2	4738	6280	30890	MFG1_3_BR1_IDA_TOF3_P50	30890_MFG1_3_BR1_IDA_TOF3_P50_Wrong.wiff	CAALFM_C202540WA	3635820	XP_722620	1	XP_722479.1	23	21	0.27	13.7		1722
MFG1_3 (N-GFP)	MFG1	3643884	XP_714447.2	4738	6280	30890	MFG1_3_BR1_IDA_TOF3_P50	30890_MFG1_3_BR1_IDA_TOF3_P50_Wrong.wiff	RPN1	3636051	XP_722279	1	XP_722167.1	4	4	0.05	4.4		994
MFG1_3 (N-GFP)	MFG1	3643884	XP_714447.2	4738	6280	30890	MFG1_3_BR1_IDA_TOF3_P50	30890_MFG1_3_BR1_IDA_TOF3_P50_Wrong.wiff	KEM1	3636022	XP_722291	1	XP_722179.1	24	19	0.28	15.5		1469
MFG1_3 (N-GFP)	MFG1	3643884	XP_714447.2	4738	6280	30890	MFG1_3_BR1_IDA_TOF3_P50	30890_MFG1_3_BR1_IDA_TOF3_P50_Wrong.wiff	HSP70	3636073	XP_722300	1	XP_722186.1	66	10	0.52	42.2		656
MFG1_3 (N-GFP)	MFG1	3643884	XP_714447.2	4738	6280	30890	MFG1_3_BR1_IDA_TOF3_P50	30890_MFG1_3_BR1_IDA_TOF3_P50_Wrong.wiff	CaO19.12461	3636035	XP_722313	1	XP_722199.1	4	4	0.04	10.6		444
MFG1_3 (N-GFP)	MFG1	3643884	XP_714447.2	4738	6280	30890	MFG1_3_BR1_IDA_TOF3_P50	30890_MFG1_3_BR1_IDA_TOF3_P50_Wrong.wiff	DIM1	3636084	XP_722328	1	XP_722214.1	2	2	0.02	6.7		326
MFG1_3 (N-GFP)	MFG1	3643884	XP_714447.2	4738	6280	30890	MFG1_3_BR1_IDA_TOF3_P50	30890_MFG1_3_BR1_IDA_TOF3_P50_Wrong.wiff	DOR14	3636097	XP_722341	1	XP_722227.1	8	7	0.1	15.3		517
MFG1_3 (N-GFP)	MFG1	3643884	XP_714447.2	4738	6280	30890	MFG1_3_BR1_IDA_TOF3_P50	30890_MFG1_3_BR1_IDA_TOF3_P50_Wrong.wiff	YBP1	3636047	XP_722350	1	XP_722236.1	2	2	0.02	2.1		665
MFG1_3 (N-GFP)	MFG1	3643884	XP_714447.2	4738	6280	30890	MFG1_3_BR1_IDA_TOF3_P50	30890_MFG1_3_BR1_IDA_TOF3_P50_Wrong.wiff	SAH1	3636277	XP_721980	1	XP_721821.1	6	6	0.07	15.8		450
MFG1_3 (N-GFP)	MFG1	3643884	XP_714447.2	4738	6280	30890	MFG1_3_BR1_IDA_TOF3_P50	30890_MFG1_3_BR1_IDA_TOF3_P50_Wrong.wiff	MPD1	3636235	XP_721990	1	XP_721830.1	4	3	0.04	8.7		299
MFG1_3 (N-GFP)	MFG1	3643884	XP_714447.2	4738	6280	30890	MFG1_3_BR1_IDA_TOF3_P50	30890_MFG1_3_BR1_IDA_TOF3_P50_Wrong.wiff	YTA7	3636302	XP_722018	1	XP_721858.1	57	28	0.68	30.4		1314
MFG1_3 (N-GFP)	MFG1	3643884	XP_714447.2	4738	6280	30890	MFG1_3_BR1_IDA_TOF3_P50	30890_MFG1_3_BR1_IDA_TOF3_P50_Wrong.wiff	SSD1	3636358	XP_722028	1	XP_721868.1	10	9	0.11	11.5		1262
MFG1_3 (N-GFP)	MFG1	3643884	XP_714447.2	4738	6280	30890	MFG1_3_BR1_IDA_TOF3_P50	30890_MFG1_3_BR1_IDA_TOF3_P50_Wrong.wiff	HAS1	3636361	XP_722031	1	XP_721871.1	23	13	0.27	28		569
MFG1_3 (N-GFP)	MFG1	3643884	XP_714447.2	4738	6280	30890	MFG1_3_BR1_IDA_TOF3_P50	30890_MFG1_3_BR1_IDA_TOF3_P50_Wrong.wiff	PFK1	3636239	XP_722036	1	XP_721876.1	10	9	0.1	11.1		987
MFG1_3 (N-GFP)	MFG1	3643884	XP_714447.2	4738	6280	30890	MFG1_3_BR1_IDA_TOF3_P50	30890_MFG1_3_BR1_IDA_TOF3_P50_Wrong.wiff	CCT3	3636327	XP_722073	1	XP_721912.1	8	7	0.08	18		529
MFG1_3 (N-GFP)	MFG1	3643884	XP_714447.2	4738	6280	30890	MFG1_3_BR1_IDA_TOF3_P50	30890_MFG1_3_BR1_IDA_TOF3_P50_Wrong.wiff	COR1	3636339	XP_722085	1	XP_721924.1	3	3	0.04	12.1		439
MFG1_3 (N-GFP)	MFG1	3643884	XP_714447.2	4738	6280	30890	MFG1_3_BR1_IDA_TOF3_P50	30890_MFG1_3_BR1_IDA_TOF3_P50_Wrong.wiff	CaO19.11504	3636319	XP_722090	1	XP_721929.1	3	2	0.04	6.9		303
MFG1_3 (N-GFP)	MFG1	3643884	XP_714447.2	4738	6280	30890	MFG1_3_BR1_IDA_TOF3_P50	30890_MFG1_3_BR1_IDA_TOF3_P50_Wrong.wiff	APM1	3636342	XP_722105	1	XP_721944.1	3	3	0.04	8.9		438
MFG1_3 (N-GFP)	MFG1	3643884	XP_714447.2	4738	6280	30890	MFG1_3_BR1_IDA_TOF3_P50	30890_MFG1_3_BR1_IDA_TOF3_P50_Wrong.wiff	CaO19.11525	3636348	XP_722111	1	XP_721951.1	3	2	0.03	4.9		752
MFG1_3 (N-GFP)	MFG1	3643884	XP_714447.2	4738	6280	30890	MFG1_3_BR1_IDA_TOF3_P50	30890_MFG1_3_BR1_IDA_TOF3_P50_Wrong.wiff	CAALFM_C302350WA	3636618	XP_721688	1	XP_721568.1	5	4	0.05	7.4		666
MFG1_3 (N-GFP)	MFG1	3643884	XP_714447.2	4738	6280	30890	MFG1_3_BR1_IDA_TOF3_P50	30890_MFG1_3_BR1_IDA_TOF3_P50_Wrong.wiff	ILV2	3636552	XP_721692	1	XP_721571.1	11	9	0.14	17.3		683
MFG1_3 (N-GFP)	MFG1	3643884	XP_714447.2	4738	6280	30890	MFG1_3_BR1_IDA_TOF3_P50	30890_MFG1_3_BR1_IDA_TOF3_P50_Wrong.wiff	GFA1	3636557	XP_721697	1	XP_721577.1	22	15	0.25	27.5		713
MFG1_3 (N-GFP)	MFG1	3643884	XP_714447.2	4738	6280	30890	MFG1_3_BR1_IDA_TOF3_P50	30890_MFG1_3_BR1_IDA_TOF3_P50_Wrong.wiff	CAALFM_C302260CA	3636636	XP_721698	1	XP_721578.1	5	5	0.06	9		586
MFG1_3 (N-GFP)	MFG1	3643884	XP_714447.2	4738	6280	30890	MFG1_3_BR1_IDA_TOF3_P50	30890_MFG1_3_BR1_IDA_TOF3_P50_Wrong.wiff	CAALFM_C302160CA	3636654	XP_721707	1	XP_721587.1	111	28	1.35	55.5		732
MFG1_3 (N-GFP)	MFG1	3643884	XP_714447.2	4738	6280	30890	MFG1_3_BR1_IDA_TOF3_P50	30890_MFG1_3_BR1_IDA_TOF3_P50_Wrong.wiff	ERG6	3636655	XP_721708	1	XP_721588.1	2	2	0.02	6.6		376
MFG1_3 (N-GFP)	MFG1	3643884	XP_714447.2	4738	6280	30890	MFG1_3_BR1_IDA_TOF3_P50	30890_MFG1_3_BR1_IDA_TOF3_P50_Wrong.wiff	UTP4	3636657	XP_721710	1	XP_721590.1	5	5	0.06	7.4		743
MFG1_3 (N-GFP)	MFG1	3643884	XP_714447.2	4738	6280	30890	MFG1_3_BR1_IDA_TOF3_P50	30890_MFG1_3_BR1_IDA_TOF3_P50_Wrong.wiff	RPL12	3636659	XP_721712	1	XP_721592.1	24	7	0.29	53.9		165
MFG1_3 (N-GFP)	MFG1	3643884	XP_714447.2	4738	6280	30890	MFG1_3_BR1_IDA_TOF3_P50	30890_MFG1_3_BR1_IDA_TOF3_P50_Wrong.wiff	CAALFM_C302040CA	3636579	XP_721719	1	XP_721598.1	8	5	0.1	25.2		206
MFG1_3 (N-GFP)	MFG1	3643884	XP_714447.2	4738	6280	30890	MFG1_3_BR1_IDA_TOF3_P50	30890_MFG1_3_BR1_IDA_TOF3_P50_Wrong.wiff	CAALFM_C301890CA	3636561	XP_721735	1	XP_721616.1	2	2	0.02	9.9		345
MFG1_3 (N-GFP)	MFG1	3643884	XP_714447.2	4738	6280	30890	MFG1_3_BR1_IDA_TOF3_P50	30890_MFG1_3_BR1_IDA_TOF3_P50_Wrong.wiff	DBP5	3636564	XP_721738	1	XP_721619.1	20	15	0.24	34.3		540
MFG1_3 (N-GFP)	MFG1	3643884	XP_714447.2	4738	6280	30890	MFG1_3_BR1_IDA_TOF3_P50	30890_MFG1_3_BR1_IDA_TOF3_P50_Wrong.wiff	CAALFM_C301720CA	3636601	XP_721749	1	XP_721630.1	21	19	0.25	21		1221
MFG1_3 (N-GFP)	MFG1	3643884	XP_714447.2	4738	6280	30890	MFG1_3_BR1_IDA_TOF3_P50	30890_MFG1_3_BR1_IDA_TOF3_P50_Wrong.wiff	CAALFM_C301560WA	3636669	XP_721764	1	XP_721644.1	44	23	0.53	35.7		767
MFG1_3 (N-GFP)	MFG1	3643884	XP_714447.2	4738	6280	30890	MFG1_3_BR1_IDA_TOF3_P50	30890_MFG1_3_BR1_IDA_TOF3_P50_Wrong.wiff	RPS7A	3636573	XP_721772	1	XP_721651.1	36	11	0.4	63.4		186
MFG1_3 (N-GFP)	MFG1	3643884	XP_714447.2	4738	6280	30890	MFG1_3_BR1_IDA_TOF3_P50	30890_MFG1_3_BR1_IDA_TOF3_P50_Wrong.wiff	ARF3	3636628	XP_721774	1	XP_721653.1	4	3	0.05	27.2		162
MFG1_3 (N-GFP)	MFG1	3643884	XP_714447.2	4738	6280	30890	MFG1_3_BR1_IDA_TOF3_P50	30890_MFG1_3_BR1_IDA_TOF3_P50_Wrong.wiff	CaO19.1732	3636613	XP_721803	1	XP_721683.1	2	2	0.02	4.5		620
MFG1_3 (N-GFP)	MFG1	3643884	XP_714447.2	4738	6280	30890	MFG1_3_BR1_IDA_TOF3_P50	30890_MFG1_3_BR1_IDA_TOF3_P50_Wrong.wiff	CAALFM_C102430CA	3636846	XP_721430	1	XP_721158.1	6	4	0.05	12.7		648
MFG1_3 (N-GFP)	MFG1	3643884	XP_714447.2	4738	6280	30890	MFG1_3_BR1_IDA_TOF3_P50	30890_MFG1_3_BR1_IDA_TOF3_P50_Wrong.wiff	RPL10	3636850	XP_721434	1	XP_721162.1	18	7	0.19	31.8		220
MFG1_3 (N-GFP)	MFG1	3643884	XP_714447.2	4738	6280	30890	MFG1_3_BR1_IDA_TOF3_P50	30890_MFG1_3_BR1_IDA_TOF3_P50_Wrong.wiff	SNZ1	3636803	XP_721446	1	XP_721174.1	2	2	0.02	9.2		292
MFG1_3 (N-GFP)	MFG1	3643884	XP_714447.2	4738	6280	30890	MFG1_3_BR1_IDA_TOF3_P50	30890_MFG1_3_BR1_IDA_TOF3_P50_Wrong.wiff	CAALFM_C102750CA	3636828	XP_721463	1	XP_721191.1	8	7	0.07	12.3		795
MFG1_3 (N-GFP)	MFG1	3643884	XP_714447.2	4738	6280	30890	MFG1_3_BR1_IDA_TOF3_P50	30890_MFG1_3_BR1_IDA_TOF3_P50_Wrong.wiff	TIF34	3636872	XP_721466	1	XP_721194.1	20	12	0.23	47.7		350
MFG1_3 (N-GFP)	MFG1	3643884	XP_714447.2	4738	6280	30890	MFG1_3_BR1_IDA_TOF3_P50	30890_MFG1_3_BR1_IDA_TOF3_P50_Wrong.wiff	YKT6	3636863	XP_721473	1	XP_721201.1	11	7	0.11	37.5		200
MFG1_3 (N-GFP)	MFG1	3643884	XP_714447.2	4738	6280	30890	MFG1_3_BR1_IDA_TOF3_P50	30890_MFG1_3_BR1_IDA_TOF3_P50_Wrong.wiff	RPL13	3636841	XP_721492	1	XP_721220.1	23	6	0.28	37.6		202
MFG1_3 (N-GFP)	MFG1	3643884	XP_714447.2	4738	6280	30890	MFG1_3_BR1_IDA_TOF3_P50	30890_MFG1_3_BR1_IDA_TOF3_P50_Wrong.wiff	RPS1	3636924	XP_721500	1	XP_721229.1	26	12	0.3	47.3		256
MFG1_3 (N-GFP)	MFG1	3643884	XP_714447.2	4738	6280	30890	MFG1_3_BR1_IDA_TOF3_P50	30890_MFG1_3_BR1_IDA_TOF3_P50_Wrong.wiff	CAALFM_C103100WA	3636925	XP_721501	1	XP_721230.1	5	4	0.04	5.1		1262
MFG1_3 (N-GFP)	MFG1	3643884	XP_714447.2	4738	6280	30890	MFG1_3_BR1_IDA_TOF3_P50	30890_MFG1_3_BR1_IDA_TOF3_P50_Wrong.wiff	CDC12	3636809	XP_721511	1	XP_721240.1	5	4	0.04	15.1		370
MFG1_3 (N-GFP)	MFG1	3643884	XP_714447.2	4738	6280	30890	MFG1_3_BR1_IDA_TOF3_P50	30890_MFG1_3_BR1_IDA_TOF3_P50_Wrong.wiff	BMH1	3636810	XP_721512	1	XP_721241.1	9	9	0.11	39.8		264
MFG1_3 (N-GFP)	MFG1	3643884	XP_714447.2	4738	6280	30890	MFG1_3_BR1_IDA_TOF3_P50	30890_MFG1_3_BR1_IDA_TOF3_P50_Wrong.wiff	RLI1	3636888	XP_721532	1	XP_721261.1	17	13	0.18	29.3		622
MFG1_3 (N-GFP)	MFG1	3643884	XP_714447.2	4738	6280	30890	MFG1_3_BR1_IDA_TOF3_P50	30890_MFG1_3_BR1_IDA_TOF3_P50_Wrong.wiff	CAALFM_C103360WA	3636889	XP_721533	1	XP_721262.1	4	4	0.05	3.5		1410
MFG1_3 (N-GFP)	MFG1	3643884	XP_714447.2	4738	6280	30890	MFG1_3_BR1_IDA_TOF3_P50	30890_MFG1_3_BR1_IDA_TOF3_P50_Wrong.wiff	CAALFM_C103370WA	3636891	XP_721535	1	XP_721264.1	6	6	0.07	9.9		629
MFG1_3 (N-GFP)	MFG1	3643884	XP_714447.2	4738	6280	30890	MFG1_3_BR1_IDA_TOF3_P50	30890_MFG1_3_BR1_IDA_TOF3_P50_Wrong.wiff	RPN3	3636917	XP_721552	1	XP_721281.1	3	3	0.04	6.4		481
MFG1_3 (N-GFP)	MFG1	3643884	XP_714447.2	4738	6280	30890	MFG1_3_BR1_IDA_TOF3_P50	30890_MFG1_3_BR1_IDA_TOF3_P50_Wrong.wiff	COQ6	3636878	XP_721556	1	XP_721285.1	3	2	0.04	4.8		480
MFG1_3 (N-GFP)	MFG1	3643884	XP_714447.2	4738	6280	30890	MFG1_3_BR1_IDA_TOF3_P50	30890_MFG1_3_BR1_IDA_TOF3_P50_Wrong.wiff	MRPL27	3636884	XP_721562	1	XP_721291.1	2	2	0.02	11.9		168
MFG1_3 (N-GFP)	MFG1	3643884	XP_714447.2	4738	6280	30890	MFG1_3_BR1_IDA_TOF3_P50	30890_MFG1_3_BR1_IDA_TOF3_P50_Wrong.wiff	CAALFM_C702120CA	3637019	XP_721341	1	XP_720828.1; XP_888832.1	2	2	0.02	13.1		153
MFG1_3 (N-GFP)	MFG1	3643884	XP_714447.2	4738	6280	30890	MFG1_3_BR1_IDA_TOF3_P50	30890_MFG1_3_BR1_IDA_TOF3_P50_Wrong.wiff	HSP90	3636951	XP_721353	1	XP_720840.1; XP_888823.1	41	24	0.48	40.3		707
MFG1_3 (N-GFP)	MFG1	3643884	XP_714447.2	4738	6280	30890	MFG1_3_BR1_IDA_TOF3_P50	30890_MFG1_3_BR1_IDA_TOF3_P50_Wrong.wiff	TOM40	3636968	XP_721362	1	XP_720849.1; XP_888817.1	3	3	0.04	11.5		390
MFG1_3 (N-GFP)	MFG1	3643884	XP_714447.2	4738	6280	30890	MFG1_3_BR1_IDA_TOF3_P50	30890_MFG1_3_BR1_IDA_TOF3_P50_Wrong.wiff	RVB2	3637055	XP_721377	1	XP_720864.1; XP_888802.1	2	2	0.02	6.4		498
MFG1_3 (N-GFP)	MFG1	3643884	XP_714447.2	4738	6280	30890	MFG1_3_BR1_IDA_TOF3_P50	30890_MFG1_3_BR1_IDA_TOF3_P50_Wrong.wiff	PFK2	3637056	XP_721378	1	XP_720865.1; XP_888801.1	23	18	0.25	24.1		946
MFG1_3 (N-GFP)	MFG1	3643884	XP_714447.2	4738	6280	30890	MFG1_3_BR1_IDA_TOF3_P50	30890_MFG1_3_BR1_IDA_TOF3_P50_Wrong.wiff	RPL5	3637057	XP_721379	1	XP_720866.1; XP_888800.1	8	5	0.1	25.2		298
MFG1_3 (N-GFP)	MFG1	3643884	XP_714447.2	4738	6280	30890	MFG1_3_BR1_IDA_TOF3_P50	30890_MFG1_3_BR1_IDA_TOF3_P50_Wrong.wiff	LAT1	3636986	XP_721397	1	XP_720884.1; XP_888786.1	3	3	0.03	7.3		477
MFG1_3 (N-GFP)	MFG1	3643884	XP_714447.2	4738	6280	30890	MFG1_3_BR1_IDA_TOF3_P50	30890_MFG1_3_BR1_IDA_TOF3_P50_Wrong.wiff	BEM2	3637044	XP_721409	1	XP_720896.1; XP_888778.1	4	3	0.04	2.3		2252
MFG1_3 (N-GFP)	MFG1	3643884	XP_714447.2	4738	6280	30890	MFG1_3_BR1_IDA_TOF3_P50	30890_MFG1_3_BR1_IDA_TOF3_P50_Wrong.wiff	PRT1	3636959	XP_721420	1	XP_720907.1; XP_888768.1	23	17	0.27	31.3		739
MFG1_3 (N-GFP)	MFG1	3643884	XP_714447.2	4738	6280	30890	MFG1_3_BR1_IDA_TOF3_P50	30890_MFG1_3_BR1_IDA_TOF3_P50_Wrong.wiff	TAF14	3637312	XP_721044	1	XP_720922.1	4	4	0.05	30.9		236
MFG1_3 (N-GFP)	MFG1	3643884	XP_714447.2	4738	6280	30890	MFG1_3_BR1_IDA_TOF3_P50	30890_MFG1_3_BR1_IDA_TOF3_P50_Wrong.wiff	NOP12	3637230	XP_721055	1	XP_720933.1	11	7	0.13	17.2		454
MFG1_3 (N-GFP)	MFG1	3643884	XP_714447.2	4738	6280	30890	MFG1_3_BR1_IDA_TOF3_P50	30890_MFG1_3_BR1_IDA_TOF3_P50_Wrong.wiff	CaO19.8433	3637234	XP_721059	1	XP_720937.1	7	6	0.08	8.8		692
MFG1_3 (N-GFP)	MFG1	3643884	XP_714447.2	4738	6280	30890	MFG1_3_BR1_IDA_TOF3_P50	30890_MFG1_3_BR1_IDA_TOF3_P50_Wrong.wiff	CaO19.8435	3637236	XP_721061	1	XP_720939.1	18	16	0.22	10.6		1914
MFG1_3 (N-GFP)	MFG1	3643884	XP_714447.2	4738	6280	30890	MFG1_3_BR1_IDA_TOF3_P50	30890_MFG1_3_BR1_IDA_TOF3_P50_Wrong.wiff	CaO19.8442	3637303	XP_721068	1	XP_720946.1	2	2	0.02	9.5		189
MFG1_3 (N-GFP)	MFG1	3643884	XP_714447.2	4738	6280	30890	MFG1_3_BR1_IDA_TOF3_P50	30890_MFG1_3_BR1_IDA_TOF3_P50_Wrong.wiff	GCD7	3637289	XP_721071	1	XP_720949.1	3	3	0.04	11.2		365
MFG1_3 (N-GFP)	MFG1	3643884	XP_714447.2	4738	6280	30890	MFG1_3_BR1_IDA_TOF3_P50	30890_MFG1_3_BR1_IDA_TOF3_P50_Wrong.wiff	MRPL24	3637292	XP_721074	1	XP_720952.1	2	2	0.02	8.3		265
MFG1_3 (N-GFP)	MFG1	3643884	XP_714447.2	4738	6280	30890	MFG1_3_BR1_IDA_TOF3_P50	30890_MFG1_3_BR1_IDA_TOF3_P50_Wrong.wiff	RPL21	3637227	XP_721086	1	XP_720964.1	8	4	0.1	44		109
MFG1_3 (N-GFP)	MFG1	3643884	XP_714447.2	4738	6280	30890	MFG1_3_BR1_IDA_TOF3_P50	30890_MFG1_3_BR1_IDA_TOF3_P50_Wrong.wiff	GPM1	3637276	XP_721143	1	XP_721022.1	10	8	0.12	40.7		248
MFG1_3 (N-GFP)	MFG1	3643884	XP_714447.2	4738	6280	30890	MFG1_3_BR1_IDA_TOF3_P50	30890_MFG1_3_BR1_IDA_TOF3_P50_Wrong.wiff	GCD11	3637619	XP_720662	1	XP_720534.1	15	11	0.18	29.4		534
MFG1_3 (N-GFP)	MFG1	3643884	XP_714447.2	4738	6280	30890	MFG1_3_BR1_IDA_TOF3_P50	30890_MFG1_3_BR1_IDA_TOF3_P50_Wrong.wiff	CaO19.11703	3637622	XP_720665	1	XP_720538.1	4	4	0.05	19.6		327
MFG1_3 (N-GFP)	MFG1	3643884	XP_714447.2	4738	6280	30890	MFG1_3_BR1_IDA_TOF3_P50	30890_MFG1_3_BR1_IDA_TOF3_P50_Wrong.wiff	RET2	3637630	XP_720673	1	XP_720546.1	6	6	0.07	16.9		573
MFG1_3 (N-GFP)	MFG1	3643884	XP_714447.2	4738	6280	30890	MFG1_3_BR1_IDA_TOF3_P50	30890_MFG1_3_BR1_IDA_TOF3_P50_Wrong.wiff	TIF5	3637599	XP_720697	1	XP_720569.1	6	5	0.06	15.5		420
MFG1_3 (N-GFP)	MFG1	3643884	XP_714447.2	4738	6280	30890	MFG1_3_BR1_IDA_TOF3_P50	30890_MFG1_3_BR1_IDA_TOF3_P50_Wrong.wiff	CaO19.11739	3637601	XP_720699	1	XP_720571.1	2	2	0.02	7		387
MFG1_3 (N-GFP)	MFG1	3643884	XP_714447.2	4738	6280	30890	MFG1_3_BR1_IDA_TOF3_P50	30890_MFG1_3_BR1_IDA_TOF3_P50_Wrong.wiff	CaO19.11744	3637636	XP_720704	1	XP_720576.1	5	5	0.05	8		799
MFG1_3 (N-GFP)	MFG1	3643884	XP_714447.2	4738	6280	30890	MFG1_3_BR1_IDA_TOF3_P50	30890_MFG1_3_BR1_IDA_TOF3_P50_Wrong.wiff	CaO19.11759	3637587	XP_720719	1	XP_720591.1	5	5	0.06	25.1		335
MFG1_3 (N-GFP)	MFG1	3643884	XP_714447.2	4738	6280	30890	MFG1_3_BR1_IDA_TOF3_P50	30890_MFG1_3_BR1_IDA_TOF3_P50_Wrong.wiff	RPS5	3637570	XP_720769	1	XP_720641.1	7	5	0.09	23.1		225
MFG1_3 (N-GFP)	MFG1	3643884	XP_714447.2	4738	6280	30890	MFG1_3_BR1_IDA_TOF3_P50	30890_MFG1_3_BR1_IDA_TOF3_P50_Wrong.wiff	CAALFM_C403290WA	3637887	XP_720417	1	XP_720189.1	8	6	0.08	9.8		899
MFG1_3 (N-GFP)	MFG1	3643884	XP_714447.2	4738	6280	30890	MFG1_3_BR1_IDA_TOF3_P50	30890_MFG1_3_BR1_IDA_TOF3_P50_Wrong.wiff	RPF1	3637890	XP_720420	1	XP_720192.1	12	6	0.14	27.4		296
MFG1_3 (N-GFP)	MFG1	3643884	XP_714447.2	4738	6280	30890	MFG1_3_BR1_IDA_TOF3_P50	30890_MFG1_3_BR1_IDA_TOF3_P50_Wrong.wiff	NAN1	3637932	XP_720441	1	XP_720211.1	7	7	0.08	10.8		839
MFG1_3 (N-GFP)	MFG1	3643884	XP_714447.2	4738	6280	30890	MFG1_3_BR1_IDA_TOF3_P50	30890_MFG1_3_BR1_IDA_TOF3_P50_Wrong.wiff	ZUO1	3637908	XP_720460	1	XP_720230.1	7	6	0.09	14.8		427
MFG1_3 (N-GFP)	MFG1	3643884	XP_714447.2	4738	6280	30890	MFG1_3_BR1_IDA_TOF3_P50	30890_MFG1_3_BR1_IDA_TOF3_P50_Wrong.wiff	HCA4	3637911	XP_720463	1	XP_720233.1	4	3	0.04	6.3		765
MFG1_3 (N-GFP)	MFG1	3643884	XP_714447.2	4738	6280	30890	MFG1_3_BR1_IDA_TOF3_P50	30890_MFG1_3_BR1_IDA_TOF3_P50_Wrong.wiff	SAS10	3637899	XP_720467	1	XP_720237.1	2	2	0.02	4.8		564
MFG1_3 (N-GFP)	MFG1	3643884	XP_714447.2	4738	6280	30890	MFG1_3_BR1_IDA_TOF3_P50	30890_MFG1_3_BR1_IDA_TOF3_P50_Wrong.wiff	CAALFM_C402780WA	3637902	XP_720470	1	XP_720240.1	7	7	0.08	19.7		544
MFG1_3 (N-GFP)	MFG1	3643884	XP_714447.2	4738	6280	30890	MFG1_3_BR1_IDA_TOF3_P50	30890_MFG1_3_BR1_IDA_TOF3_P50_Wrong.wiff	EMP70	3637919	XP_720496	1	XP_720265.1	2	2	0.02	4.1		630
MFG1_3 (N-GFP)	MFG1	3643884	XP_714447.2	4738	6280	30890	MFG1_3_BR1_IDA_TOF3_P50	30890_MFG1_3_BR1_IDA_TOF3_P50_Wrong.wiff	CAALFM_C701030CA	3638019	XP_720305	1	XP_888733.1	21	17	0.26	18.9		1217
MFG1_3 (N-GFP)	MFG1	3643884	XP_714447.2	4738	6280	30890	MFG1_3_BR1_IDA_TOF3_P50	30890_MFG1_3_BR1_IDA_TOF3_P50_Wrong.wiff	RPP0	3638023	XP_720309	1	XP_888730.1	31	10	0.38	41.3		312
MFG1_3 (N-GFP)	MFG1	3643884	XP_714447.2	4738	6280	30890	MFG1_3_BR1_IDA_TOF3_P50	30890_MFG1_3_BR1_IDA_TOF3_P50_Wrong.wiff	RPS18	3637953	XP_720312	1	XP_888727.1	14	5	0.16	43		135
MFG1_3 (N-GFP)	MFG1	3643884	XP_714447.2	4738	6280	30890	MFG1_3_BR1_IDA_TOF3_P50	30890_MFG1_3_BR1_IDA_TOF3_P50_Wrong.wiff	YML6	3637954	XP_720313	1	XP_888726.1	4	3	0.05	14.4		278
MFG1_3 (N-GFP)	MFG1	3643884	XP_714447.2	4738	6280	30890	MFG1_3_BR1_IDA_TOF3_P50	30890_MFG1_3_BR1_IDA_TOF3_P50_Wrong.wiff	RFC2	3637939	XP_720328	1	XP_888712.1	7	7	0.08	23.1		363
MFG1_3 (N-GFP)	MFG1	3643884	XP_714447.2	4738	6280	30890	MFG1_3_BR1_IDA_TOF3_P50	30890_MFG1_3_BR1_IDA_TOF3_P50_Wrong.wiff	NOP15	3637966	XP_720342	1	XP_888701.1	14	5	0.17	22.8		267
MFG1_3 (N-GFP)	MFG1	3643884	XP_714447.2	4738	6280	30890	MFG1_3_BR1_IDA_TOF3_P50	30890_MFG1_3_BR1_IDA_TOF3_P50_Wrong.wiff	GUS1	3638029	XP_720349	1	XP_888694.1	7	7	0.08	10.9		725
MFG1_3 (N-GFP)	MFG1	3643884	XP_714447.2	4738	6280	30890	MFG1_3_BR1_IDA_TOF3_P50	30890_MFG1_3_BR1_IDA_TOF3_P50_Wrong.wiff	RPA135	3637996	XP_720354	1	XP_888689.1	21	15	0.23	19.4		1166
MFG1_3 (N-GFP)	MFG1	3643884	XP_714447.2	4738	6280	30890	MFG1_3_BR1_IDA_TOF3_P50	30890_MFG1_3_BR1_IDA_TOF3_P50_Wrong.wiff	CAALFM_C700350CA	3638039	XP_720376	1	XP_888669.1	15	11	0.18	32.1		439
MFG1_3 (N-GFP)	MFG1	3643884	XP_714447.2	4738	6280	30890	MFG1_3_BR1_IDA_TOF3_P50	30890_MFG1_3_BR1_IDA_TOF3_P50_Wrong.wiff	CAALFM_C700250CA	3637979	XP_720388	1	XP_888659.1	16	9	0.2	52.9		187
MFG1_3 (N-GFP)	MFG1	3643884	XP_714447.2	4738	6280	30890	MFG1_3_BR1_IDA_TOF3_P50	30890_MFG1_3_BR1_IDA_TOF3_P50_Wrong.wiff	RVS161	3638005	XP_720414	1	XP_888636.1	5	4	0.06	17		293
MFG1_3 (N-GFP)	MFG1	3643884	XP_714447.2	4738	6280	30890	MFG1_3_BR1_IDA_TOF3_P50	30890_MFG1_3_BR1_IDA_TOF3_P50_Wrong.wiff	RPL9	3638287	XP_720065	1	XP_719935.1	15	8	0.17	49.2		191
MFG1_3 (N-GFP)	MFG1	3643884	XP_714447.2	4738	6280	30890	MFG1_3_BR1_IDA_TOF3_P50	30890_MFG1_3_BR1_IDA_TOF3_P50_Wrong.wiff	STH1	3638290	XP_720068	1	XP_719938.1	4	4	0.05	4.4		1303
MFG1_3 (N-GFP)	MFG1	3643884	XP_714447.2	4738	6280	30890	MFG1_3_BR1_IDA_TOF3_P50	30890_MFG1_3_BR1_IDA_TOF3_P50_Wrong.wiff	HTZ1	3638209	XP_720154	1	XP_720022.1	15	3	0.13	30.1		133
MFG1_3 (N-GFP)	MFG1	3643884	XP_714447.2	4738	6280	30890	MFG1_3_BR1_IDA_TOF3_P50	30890_MFG1_3_BR1_IDA_TOF3_P50_Wrong.wiff	UTP9	3638451	XP_719810	1	XP_719693.1	3	2	0.03	9.9		445
MFG1_3 (N-GFP)	MFG1	3643884	XP_714447.2	4738	6280	30890	MFG1_3_BR1_IDA_TOF3_P50	30890_MFG1_3_BR1_IDA_TOF3_P50_Wrong.wiff	TPI1	3638482	XP_719842	1	XP_719725.1	6	5	0.07	27		248
MFG1_3 (N-GFP)	MFG1	3643884	XP_714447.2	4738	6280	30890	MFG1_3_BR1_IDA_TOF3_P50	30890_MFG1_3_BR1_IDA_TOF3_P50_Wrong.wiff	NOP13	3638469	XP_719862	1	XP_719745.1	7	7	0.08	29.8		396
MFG1_3 (N-GFP)	MFG1	3643884	XP_714447.2	4738	6280	30890	MFG1_3_BR1_IDA_TOF3_P50	30890_MFG1_3_BR1_IDA_TOF3_P50_Wrong.wiff	GCD2	3638437	XP_719872	1	XP_719755.1	4	4	0.05	12.2		500
MFG1_3 (N-GFP)	MFG1	3643884	XP_714447.2	4738	6280	30890	MFG1_3_BR1_IDA_TOF3_P50	30890_MFG1_3_BR1_IDA_TOF3_P50_Wrong.wiff	RPS12	3638438	XP_719881	1	XP_719764.1	5	2	0.06	13.3		143
MFG1_3 (N-GFP)	MFG1	3643884	XP_714447.2	4738	6280	30890	MFG1_3_BR1_IDA_TOF3_P50	30890_MFG1_3_BR1_IDA_TOF3_P50_Wrong.wiff	SSN6	3638518	XP_719894	1	XP_719777.1	3	2	0.03	3.2		1080
MFG1_3 (N-GFP)	MFG1	3643884	XP_714447.2	4738	6280	30890	MFG1_3_BR1_IDA_TOF3_P50	30890_MFG1_3_BR1_IDA_TOF3_P50_Wrong.wiff	TPD3	3638512	XP_719905	1	XP_719788.1	13	10	0.16	19.9		643
MFG1_3 (N-GFP)	MFG1	3643884	XP_714447.2	4738	6280	30890	MFG1_3_BR1_IDA_TOF3_P50	30890_MFG1_3_BR1_IDA_TOF3_P50_Wrong.wiff	TDH3	3638540	XP_719909	1	XP_719792.1	24	12	0.28	52.8		335
MFG1_3 (N-GFP)	MFG1	3643884	XP_714447.2	4738	6280	30890	MFG1_3_BR1_IDA_TOF3_P50	30890_MFG1_3_BR1_IDA_TOF3_P50_Wrong.wiff	CAALFM_C306760WA	3638502	XP_719920	1	XP_719803.1	6	5	0.07	12.7		275
MFG1_3 (N-GFP)	MFG1	3643884	XP_714447.2	4738	6280	30890	MFG1_3_BR1_IDA_TOF3_P50	30890_MFG1_3_BR1_IDA_TOF3_P50_Wrong.wiff	NIC96	3638677	XP_719580	1	XP_719452.1	2	2	0.02	2.7		960
MFG1_3 (N-GFP)	MFG1	3643884	XP_714447.2	4738	6280	30890	MFG1_3_BR1_IDA_TOF3_P50	30890_MFG1_3_BR1_IDA_TOF3_P50_Wrong.wiff	KAR2	3638764	XP_719590	1	XP_719462.1	32	19	0.36	30.1		687
MFG1_3 (N-GFP)	MFG1	3643884	XP_714447.2	4738	6280	30890	MFG1_3_BR1_IDA_TOF3_P50	30890_MFG1_3_BR1_IDA_TOF3_P50_Wrong.wiff	RPA49	3638767	XP_719593	1	XP_719466.1	12	7	0.14	23.4		393
MFG1_3 (N-GFP)	MFG1	3643884	XP_714447.2	4738	6280	30890	MFG1_3_BR1_IDA_TOF3_P50	30890_MFG1_3_BR1_IDA_TOF3_P50_Wrong.wiff	MRPL16	3638769	XP_719595	1	XP_719468.1	4	4	0.04	23.9		213
MFG1_3 (N-GFP)	MFG1	3643884	XP_714447.2	4738	6280	30890	MFG1_3_BR1_IDA_TOF3_P50	30890_MFG1_3_BR1_IDA_TOF3_P50_Wrong.wiff	ARO8	3638758	XP_719668	1	XP_719544.1	7	5	0.09	13		491
MFG1_3 (N-GFP)	MFG1	3643884	XP_714447.2	4738	6280	30890	MFG1_3_BR1_IDA_TOF3_P50	30890_MFG1_3_BR1_IDA_TOF3_P50_Wrong.wiff	NDT801	3638718	XP_719690	1	XP_719565.1	23	8	0.24	19		504
MFG1_3 (N-GFP)	MFG1	3643884	XP_714447.2	4738	6280	30890	MFG1_3_BR1_IDA_TOF3_P50	30890_MFG1_3_BR1_IDA_TOF3_P50_Wrong.wiff	CAALFM_CR09740WA	3639008	XP_719308	1		5	4	0.06	12.5		399
MFG1_3 (N-GFP)	MFG1	3643884	XP_714447.2	4738	6280	30890	MFG1_3_BR1_IDA_TOF3_P50	30890_MFG1_3_BR1_IDA_TOF3_P50_Wrong.wiff	SIK1	3638925	XP_719331	1		285	31	3.26	69.8		516
MFG1_3 (N-GFP)	MFG1	3643884	XP_714447.2	4738	6280	30890	MFG1_3_BR1_IDA_TOF3_P50	30890_MFG1_3_BR1_IDA_TOF3_P50_Wrong.wiff	ZCF39	3639037	XP_719345	1		5	5	0.06	10.9		681
MFG1_3 (N-GFP)	MFG1	3643884	XP_714447.2	4738	6280	30890	MFG1_3_BR1_IDA_TOF3_P50	30890_MFG1_3_BR1_IDA_TOF3_P50_Wrong.wiff	UTP5	3638922	XP_719361	1		10	8	0.11	18.2		636
MFG1_3 (N-GFP)	MFG1	3643884	XP_714447.2	4738	6280	30890	MFG1_3_BR1_IDA_TOF3_P50	30890_MFG1_3_BR1_IDA_TOF3_P50_Wrong.wiff	TRX1	3638950	XP_719372	1		6	3	0.07	32		103
MFG1_3 (N-GFP)	MFG1	3643884	XP_714447.2	4738	6280	30890	MFG1_3_BR1_IDA_TOF3_P50	30890_MFG1_3_BR1_IDA_TOF3_P50_Wrong.wiff	CTM1	3638951	XP_719373	1		2	2	0.02	3.6		686
MFG1_3 (N-GFP)	MFG1	3643884	XP_714447.2	4738	6280	30890	MFG1_3_BR1_IDA_TOF3_P50	30890_MFG1_3_BR1_IDA_TOF3_P50_Wrong.wiff	CAALFM_CR10470CA	3638979	XP_719385	1		2	2	0.02	5.5		531
MFG1_3 (N-GFP)	MFG1	3643884	XP_714447.2	4738	6280	30890	MFG1_3_BR1_IDA_TOF3_P50	30890_MFG1_3_BR1_IDA_TOF3_P50_Wrong.wiff	EIF4E	3638981	XP_719387	1		8	5	0.09	30.6		209
MFG1_3 (N-GFP)	MFG1	3643884	XP_714447.2	4738	6280	30890	MFG1_3_BR1_IDA_TOF3_P50	30890_MFG1_3_BR1_IDA_TOF3_P50_Wrong.wiff	CKA1	3639018	XP_719411	1		7	5	0.07	19.7		416
MFG1_3 (N-GFP)	MFG1	3643884	XP_714447.2	4738	6280	30890	MFG1_3_BR1_IDA_TOF3_P50	30890_MFG1_3_BR1_IDA_TOF3_P50_Wrong.wiff	RFC4	3638994	XP_719417	1		3	3	0.04	9.3		323
MFG1_3 (N-GFP)	MFG1	3643884	XP_714447.2	4738	6280	30890	MFG1_3_BR1_IDA_TOF3_P50	30890_MFG1_3_BR1_IDA_TOF3_P50_Wrong.wiff	CAALFM_CR10750CA	3638942	XP_719423	1		4	2	0.05	18.7		134
MFG1_3 (N-GFP)	MFG1	3643884	XP_714447.2	4738	6280	30890	MFG1_3_BR1_IDA_TOF3_P50	30890_MFG1_3_BR1_IDA_TOF3_P50_Wrong.wiff	SRP72	3639106	XP_719198	1	XP_719081.1	5	5	0.06	11.2		635
MFG1_3 (N-GFP)	MFG1	3643884	XP_714447.2	4738	6280	30890	MFG1_3_BR1_IDA_TOF3_P50	30890_MFG1_3_BR1_IDA_TOF3_P50_Wrong.wiff	NAB3	3639067	XP_719211	1	XP_719094.1	9	7	0.11	12.2		836
MFG1_3 (N-GFP)	MFG1	3643884	XP_714447.2	4738	6280	30890	MFG1_3_BR1_IDA_TOF3_P50	30890_MFG1_3_BR1_IDA_TOF3_P50_Wrong.wiff	MRT4	3639102	XP_719230	1	XP_719113.1	8	5	0.1	31.7		230
MFG1_3 (N-GFP)	MFG1	3643884	XP_714447.2	4738	6280	30890	MFG1_3_BR1_IDA_TOF3_P50	30890_MFG1_3_BR1_IDA_TOF3_P50_Wrong.wiff	SHE3	3639162	XP_719272	1	XP_719156.1	7	7	0.07	20		519
MFG1_3 (N-GFP)	MFG1	3643884	XP_714447.2	4738	6280	30890	MFG1_3_BR1_IDA_TOF3_P50	30890_MFG1_3_BR1_IDA_TOF3_P50_Wrong.wiff	POL5	3639122	XP_719274	1	XP_719159.1	4	4	0.05	6.3		1055
MFG1_3 (N-GFP)	MFG1	3643884	XP_714447.2	4738	6280	30890	MFG1_3_BR1_IDA_TOF3_P50	30890_MFG1_3_BR1_IDA_TOF3_P50_Wrong.wiff	PHZ1	3639152	XP_719296	1	XP_719180.1	2	2	0.02	12.3		302
MFG1_3 (N-GFP)	MFG1	3643884	XP_714447.2	4738	6280	30890	MFG1_3_BR1_IDA_TOF3_P50	30890_MFG1_3_BR1_IDA_TOF3_P50_Wrong.wiff	CaO19.13072	3639134	XP_719303	1	XP_719187.1	4	4	0.05	13.3		369
MFG1_3 (N-GFP)	MFG1	3643884	XP_714447.2	4738	6280	30890	MFG1_3_BR1_IDA_TOF3_P50	30890_MFG1_3_BR1_IDA_TOF3_P50_Wrong.wiff	RRS1	3639352	XP_718976	1	XP_718874.1	6	3	0.07	19		205
MFG1_3 (N-GFP)	MFG1	3643884	XP_714447.2	4738	6280	30890	MFG1_3_BR1_IDA_TOF3_P50	30890_MFG1_3_BR1_IDA_TOF3_P50_Wrong.wiff	TUB2	3639329	XP_718996	1	XP_718894.1	23	8	0.26	27.4		303
MFG1_3 (N-GFP)	MFG1	3643884	XP_714447.2	4738	6280	30890	MFG1_3_BR1_IDA_TOF3_P50	30890_MFG1_3_BR1_IDA_TOF3_P50_Wrong.wiff	TUF1	3639360	XP_719009	1	XP_718907.1	4	3	0.05	9.6		426
MFG1_3 (N-GFP)	MFG1	3643884	XP_714447.2	4738	6280	30890	MFG1_3_BR1_IDA_TOF3_P50	30890_MFG1_3_BR1_IDA_TOF3_P50_Wrong.wiff	RPL16A	3639338	XP_719047	1	XP_718943.1	24	8	0.27	27.5		200
MFG1_3 (N-GFP)	MFG1	3643884	XP_714447.2	4738	6280	30890	MFG1_3_BR1_IDA_TOF3_P50	30890_MFG1_3_BR1_IDA_TOF3_P50_Wrong.wiff	CAALFM_C100160CA	3639341	XP_719050	1	XP_718946.1	31	13	0.36	38		400
MFG1_3 (N-GFP)	MFG1	3643884	XP_714447.2	4738	6280	30890	MFG1_3_BR1_IDA_TOF3_P50	30890_MFG1_3_BR1_IDA_TOF3_P50_Wrong.wiff	CCT8	3639324	XP_719058	1	XP_718954.1	9	8	0.09	18.9		540
MFG1_3 (N-GFP)	MFG1	3643884	XP_714447.2	4738	6280	30890	MFG1_3_BR1_IDA_TOF3_P50	30890_MFG1_3_BR1_IDA_TOF3_P50_Wrong.wiff	TUP1	3639369	XP_719068	1	XP_718964.1	6	5	0.07	11.3		514
MFG1_3 (N-GFP)	MFG1	3643884	XP_714447.2	4738	6280	30890	MFG1_3_BR1_IDA_TOF3_P50	30890_MFG1_3_BR1_IDA_TOF3_P50_Wrong.wiff	DHH1	3639490	XP_718788	1	XP_718704.1	11	8	0.14	18.2		549
MFG1_3 (N-GFP)	MFG1	3643884	XP_714447.2	4738	6280	30890	MFG1_3_BR1_IDA_TOF3_P50	30890_MFG1_3_BR1_IDA_TOF3_P50_Wrong.wiff	SUI2	3639569	XP_718803	1	XP_718720.1	6	5	0.07	23		300
MFG1_3 (N-GFP)	MFG1	3643884	XP_714447.2	4738	6280	30890	MFG1_3_BR1_IDA_TOF3_P50	30890_MFG1_3_BR1_IDA_TOF3_P50_Wrong.wiff	PGA63	3639524	XP_718807	1	XP_718724.1	6	5	0.07	5.4		1265
MFG1_3 (N-GFP)	MFG1	3643884	XP_714447.2	4738	6280	30890	MFG1_3_BR1_IDA_TOF3_P50	30890_MFG1_3_BR1_IDA_TOF3_P50_Wrong.wiff	CAALFM_C106600WA	3639513	XP_718839	1	XP_718753.1	12	6	0.15	23.9		347
MFG1_3 (N-GFP)	MFG1	3643884	XP_714447.2	4738	6280	30890	MFG1_3_BR1_IDA_TOF3_P50	30890_MFG1_3_BR1_IDA_TOF3_P50_Wrong.wiff	CAALFM_C106590CA	3639514	XP_718840	1	XP_718754.1	3	3	0.04	9.2		400
MFG1_3 (N-GFP)	MFG1	3643884	XP_714447.2	4738	6280	30890	MFG1_3_BR1_IDA_TOF3_P50	30890_MFG1_3_BR1_IDA_TOF3_P50_Wrong.wiff	RPS22A	3639551	XP_718852	1	XP_718767.1	12	6	0.15	56.9		130
MFG1_3 (N-GFP)	MFG1	3643884	XP_714447.2	4738	6280	30890	MFG1_3_BR1_IDA_TOF3_P50	30890_MFG1_3_BR1_IDA_TOF3_P50_Wrong.wiff	ACC1	3639688	XP_718624	1		21	17	0.23	9.7		2271
MFG1_3 (N-GFP)	MFG1	3643884	XP_714447.2	4738	6280	30890	MFG1_3_BR1_IDA_TOF3_P50	30890_MFG1_3_BR1_IDA_TOF3_P50_Wrong.wiff	CRM1	3639721	XP_718640	1		6	5	0.05	5.1		1079
MFG1_3 (N-GFP)	MFG1	3643884	XP_714447.2	4738	6280	30890	MFG1_3_BR1_IDA_TOF3_P50	30890_MFG1_3_BR1_IDA_TOF3_P50_Wrong.wiff	MRPL6	3639724	XP_718643	1		3	3	0.03	18.9		233
MFG1_3 (N-GFP)	MFG1	3643884	XP_714447.2	4738	6280	30890	MFG1_3_BR1_IDA_TOF3_P50	30890_MFG1_3_BR1_IDA_TOF3_P50_Wrong.wiff	NAP1	3639714	XP_718658	1		10	6	0.1	21.4		435
MFG1_3 (N-GFP)	MFG1	3643884	XP_714447.2	4738	6280	30890	MFG1_3_BR1_IDA_TOF3_P50	30890_MFG1_3_BR1_IDA_TOF3_P50_Wrong.wiff	KIN2	3639697	XP_718667	1		4	4	0.05	4.1		1212
MFG1_3 (N-GFP)	MFG1	3643884	XP_714447.2	4738	6280	30890	MFG1_3_BR1_IDA_TOF3_P50	30890_MFG1_3_BR1_IDA_TOF3_P50_Wrong.wiff	CAALFM_CR00130CA	3639709	XP_718679	1		6	6	0.07	15.6		390
MFG1_3 (N-GFP)	MFG1	3643884	XP_714447.2	4738	6280	30890	MFG1_3_BR1_IDA_TOF3_P50	30890_MFG1_3_BR1_IDA_TOF3_P50_Wrong.wiff	MIS12	3639669	XP_718690	1		7	7	0.08	8.2		1025
MFG1_3 (N-GFP)	MFG1	3643884	XP_714447.2	4738	6280	30890	MFG1_3_BR1_IDA_TOF3_P50	30890_MFG1_3_BR1_IDA_TOF3_P50_Wrong.wiff	CAALFM_CR00060CA	3639673	XP_718694	1		2	2	0.02	3.7		618
MFG1_3 (N-GFP)	MFG1	3643884	XP_714447.2	4738	6280	30890	MFG1_3_BR1_IDA_TOF3_P50	30890_MFG1_3_BR1_IDA_TOF3_P50_Wrong.wiff	SSE1	3639813	XP_718541	1	XP_718458.1	12	10	0.14	19		701
MFG1_3 (N-GFP)	MFG1	3643884	XP_714447.2	4738	6280	30890	MFG1_3_BR1_IDA_TOF3_P50	30890_MFG1_3_BR1_IDA_TOF3_P50_Wrong.wiff	KAP123	3639740	XP_718593	1	XP_718510.1	26	16	0.29	19.5		1109
MFG1_3 (N-GFP)	MFG1	3643884	XP_714447.2	4738	6280	30890	MFG1_3_BR1_IDA_TOF3_P50	30890_MFG1_3_BR1_IDA_TOF3_P50_Wrong.wiff	BMS1	3639801	XP_718605	1	XP_718522.1	15	11	0.17	12.9		1210
MFG1_3 (N-GFP)	MFG1	3643884	XP_714447.2	4738	6280	30890	MFG1_3_BR1_IDA_TOF3_P50	30890_MFG1_3_BR1_IDA_TOF3_P50_Wrong.wiff	ARP9	3639769	XP_718608	1	XP_718525.1	5	4	0.05	11.4		484
MFG1_3 (N-GFP)	MFG1	3643884	XP_714447.2	4738	6280	30890	MFG1_3_BR1_IDA_TOF3_P50	30890_MFG1_3_BR1_IDA_TOF3_P50_Wrong.wiff	TIF1	3639917	XP_718416	1	XP_718147.1	46	21	0.53	59.9		397
MFG1_3 (N-GFP)	MFG1	3643884	XP_714447.2	4738	6280	30890	MFG1_3_BR1_IDA_TOF3_P50	30890_MFG1_3_BR1_IDA_TOF3_P50_Wrong.wiff	RPS2	3639967	XP_718427	1	XP_718157.1	17	7	0.21	34.1		249
MFG1_3 (N-GFP)	MFG1	3643884	XP_714447.2	4738	6280	30890	MFG1_3_BR1_IDA_TOF3_P50	30890_MFG1_3_BR1_IDA_TOF3_P50_Wrong.wiff	CaO19.10846	3639968	XP_718428	1	XP_718158.1	2	2	0.02	13.5		200
MFG1_3 (N-GFP)	MFG1	3643884	XP_714447.2	4738	6280	30890	MFG1_3_BR1_IDA_TOF3_P50	30890_MFG1_3_BR1_IDA_TOF3_P50_Wrong.wiff	LYS12	3640064	XP_718292	1	XP_718193.1	6	6	0.07	19.4		376
MFG1_3 (N-GFP)	MFG1	3643884	XP_714447.2	4738	6280	30890	MFG1_3_BR1_IDA_TOF3_P50	30890_MFG1_3_BR1_IDA_TOF3_P50_Wrong.wiff	MET6	3640000	XP_718315	1	XP_718219.1	5	4	0.05	9.6		767
MFG1_3 (N-GFP)	MFG1	3643884	XP_714447.2	4738	6280	30890	MFG1_3_BR1_IDA_TOF3_P50	30890_MFG1_3_BR1_IDA_TOF3_P50_Wrong.wiff	CaO19.10096	3639978	XP_718327	1	XP_718231.1	3	3	0.04	9.4		287
MFG1_3 (N-GFP)	MFG1	3643884	XP_714447.2	4738	6280	30890	MFG1_3_BR1_IDA_TOF3_P50	30890_MFG1_3_BR1_IDA_TOF3_P50_Wrong.wiff	MCM6	3639988	XP_718371	1	XP_718276.1	2	2	0.02	3.3		880
MFG1_3 (N-GFP)	MFG1	3643884	XP_714447.2	4738	6280	30890	MFG1_3_BR1_IDA_TOF3_P50	30890_MFG1_3_BR1_IDA_TOF3_P50_Wrong.wiff	MET2	3640060	XP_718378	1	XP_718283.1	3	2	0.03	8.8		409
MFG1_3 (N-GFP)	MFG1	3643884	XP_714447.2	4738	6280	30890	MFG1_3_BR1_IDA_TOF3_P50	30890_MFG1_3_BR1_IDA_TOF3_P50_Wrong.wiff	CAALFM_C603550CA	3640246	XP_718060	1	XP_717994.1	8	7	0.09	14.7		539
MFG1_3 (N-GFP)	MFG1	3643884	XP_714447.2	4738	6280	30890	MFG1_3_BR1_IDA_TOF3_P50	30890_MFG1_3_BR1_IDA_TOF3_P50_Wrong.wiff	SRP54	3640377	XP_717934	1	XP_717868.1	3	3	0.03	5.8		556
MFG1_3 (N-GFP)	MFG1	3643884	XP_714447.2	4738	6280	30890	MFG1_3_BR1_IDA_TOF3_P50	30890_MFG1_3_BR1_IDA_TOF3_P50_Wrong.wiff	PWP2	3640416	XP_717966	1	XP_717900.1	7	6	0.08	6.9		922
MFG1_3 (N-GFP)	MFG1	3643884	XP_714447.2	4738	6280	30890	MFG1_3_BR1_IDA_TOF3_P50	30890_MFG1_3_BR1_IDA_TOF3_P50_Wrong.wiff	PMA1	3640531	XP_717759	1	XP_717665.1	12	10	0.15	14.6		895
MFG1_3 (N-GFP)	MFG1	3643884	XP_714447.2	4738	6280	30890	MFG1_3_BR1_IDA_TOF3_P50	30890_MFG1_3_BR1_IDA_TOF3_P50_Wrong.wiff	SOF1	3640585	XP_717779	1	XP_717685.1	4	4	0.05	10.6		436
MFG1_3 (N-GFP)	MFG1	3643884	XP_714447.2	4738	6280	30890	MFG1_3_BR1_IDA_TOF3_P50	30890_MFG1_3_BR1_IDA_TOF3_P50_Wrong.wiff	CAALFM_C300450CA	3640548	XP_717792	1	XP_717698.1	13	8	0.15	27.4		368
MFG1_3 (N-GFP)	MFG1	3643884	XP_714447.2	4738	6280	30890	MFG1_3_BR1_IDA_TOF3_P50	30890_MFG1_3_BR1_IDA_TOF3_P50_Wrong.wiff	UTP8	3640547	XP_717808	1	XP_717714.1	5	5	0.06	9.3		720
MFG1_3 (N-GFP)	MFG1	3643884	XP_714447.2	4738	6280	30890	MFG1_3_BR1_IDA_TOF3_P50	30890_MFG1_3_BR1_IDA_TOF3_P50_Wrong.wiff	RHR2	3640522	XP_717809	1	XP_717715.1	3	2	0.03	10.6		254
MFG1_3 (N-GFP)	MFG1	3643884	XP_714447.2	4738	6280	30890	MFG1_3_BR1_IDA_TOF3_P50	30890_MFG1_3_BR1_IDA_TOF3_P50_Wrong.wiff	RPT2	3640525	XP_717812	1	XP_717718.1	7	5	0.07	12.3		465
MFG1_3 (N-GFP)	MFG1	3643884	XP_714447.2	4738	6280	30890	MFG1_3_BR1_IDA_TOF3_P50	30890_MFG1_3_BR1_IDA_TOF3_P50_Wrong.wiff	TIM44	3640529	XP_717816	1	XP_717722.1	4	3	0.05	7.1		424
MFG1_3 (N-GFP)	MFG1	3643884	XP_714447.2	4738	6280	30890	MFG1_3_BR1_IDA_TOF3_P50	30890_MFG1_3_BR1_IDA_TOF3_P50_Wrong.wiff	CAALFM_C300130CA	3640593	XP_717830	1	XP_717736.1	3	3	0.03	5.7		525
MFG1_3 (N-GFP)	MFG1	3643884	XP_714447.2	4738	6280	30890	MFG1_3_BR1_IDA_TOF3_P50	30890_MFG1_3_BR1_IDA_TOF3_P50_Wrong.wiff	RPS24	3640568	XP_717837	1	XP_717743.1	16	6	0.19	38.5		135
MFG1_3 (N-GFP)	MFG1	3643884	XP_714447.2	4738	6280	30890	MFG1_3_BR1_IDA_TOF3_P50	30890_MFG1_3_BR1_IDA_TOF3_P50_Wrong.wiff	MRPL3	3640722	XP_717602	1	XP_717528.1	5	5	0.06	17.6		404
MFG1_3 (N-GFP)	MFG1	3643884	XP_714447.2	4738	6280	30890	MFG1_3_BR1_IDA_TOF3_P50	30890_MFG1_3_BR1_IDA_TOF3_P50_Wrong.wiff	DPM1	3640700	XP_717611	1	XP_717537.1	3	3	0.04	17.6		239
MFG1_3 (N-GFP)	MFG1	3643884	XP_714447.2	4738	6280	30890	MFG1_3_BR1_IDA_TOF3_P50	30890_MFG1_3_BR1_IDA_TOF3_P50_Wrong.wiff	PFY1	3640703	XP_717614	1	XP_717540.1	3	3	0.04	41.3		126
MFG1_3 (N-GFP)	MFG1	3643884	XP_714447.2	4738	6280	30890	MFG1_3_BR1_IDA_TOF3_P50	30890_MFG1_3_BR1_IDA_TOF3_P50_Wrong.wiff	DRG1	3640714	XP_717620	1	XP_717546.1	20	14	0.25	52.4		368
MFG1_3 (N-GFP)	MFG1	3643884	XP_714447.2	4738	6280	30890	MFG1_3_BR1_IDA_TOF3_P50	30890_MFG1_3_BR1_IDA_TOF3_P50_Wrong.wiff	CAALFM_C108110WA	3640716	XP_717622	1	XP_717548.1	12	10	0.15	11.3		1091
MFG1_3 (N-GFP)	MFG1	3643884	XP_714447.2	4738	6280	30890	MFG1_3_BR1_IDA_TOF3_P50	30890_MFG1_3_BR1_IDA_TOF3_P50_Wrong.wiff	TKL1	3640767	XP_717648	1	XP_717574.1	15	9	0.17	20.2		677
MFG1_3 (N-GFP)	MFG1	3643884	XP_714447.2	4738	6280	30890	MFG1_3_BR1_IDA_TOF3_P50	30890_MFG1_3_BR1_IDA_TOF3_P50_Wrong.wiff	OLE1	3640755	XP_717653	1	XP_717579.1	2	2	0.02	6.4		486
MFG1_3 (N-GFP)	MFG1	3643884	XP_714447.2	4738	6280	30890	MFG1_3_BR1_IDA_TOF3_P50	30890_MFG1_3_BR1_IDA_TOF3_P50_Wrong.wiff	RPT4	3640859	XP_717434	1	XP_717345.1	6	4	0.06	10.7		428
MFG1_3 (N-GFP)	MFG1	3643884	XP_714447.2	4738	6280	30890	MFG1_3_BR1_IDA_TOF3_P50	30890_MFG1_3_BR1_IDA_TOF3_P50_Wrong.wiff	MRPL40	3640861	XP_717436	1	XP_717347.1	3	3	0.04	13		338
MFG1_3 (N-GFP)	MFG1	3643884	XP_714447.2	4738	6280	30890	MFG1_3_BR1_IDA_TOF3_P50	30890_MFG1_3_BR1_IDA_TOF3_P50_Wrong.wiff	MEX67	3640921	XP_717440	1	XP_717351.1	3	3	0.04	6.6		617
MFG1_3 (N-GFP)	MFG1	3643884	XP_714447.2	4738	6280	30890	MFG1_3_BR1_IDA_TOF3_P50	30890_MFG1_3_BR1_IDA_TOF3_P50_Wrong.wiff	RPL15	3640926	XP_717445	1	XP_717356.1	15	7	0.19	36.3		204
MFG1_3 (N-GFP)	MFG1	3643884	XP_714447.2	4738	6280	30890	MFG1_3_BR1_IDA_TOF3_P50	30890_MFG1_3_BR1_IDA_TOF3_P50_Wrong.wiff	NOP2	3640912	XP_717453	1	XP_717364.1	9	6	0.1	11.3		618
MFG1_3 (N-GFP)	MFG1	3643884	XP_714447.2	4738	6280	30890	MFG1_3_BR1_IDA_TOF3_P50	30890_MFG1_3_BR1_IDA_TOF3_P50_Wrong.wiff	CAP001	3640882	XP_717457	1	XP_717368.1	4	4	0.05	9.9		545
MFG1_3 (N-GFP)	MFG1	3643884	XP_714447.2	4738	6280	30890	MFG1_3_BR1_IDA_TOF3_P50	30890_MFG1_3_BR1_IDA_TOF3_P50_Wrong.wiff	CaO19.8143	3640848	XP_717465	1	XP_717375.1	21	19	0.24	25		1042
MFG1_3 (N-GFP)	MFG1	3643884	XP_714447.2	4738	6280	30890	MFG1_3_BR1_IDA_TOF3_P50	30890_MFG1_3_BR1_IDA_TOF3_P50_Wrong.wiff	NHP2	3640872	XP_717481	1	XP_717389.1	44	4	0.54	20.8		159
MFG1_3 (N-GFP)	MFG1	3643884	XP_714447.2	4738	6280	30890	MFG1_3_BR1_IDA_TOF3_P50	30890_MFG1_3_BR1_IDA_TOF3_P50_Wrong.wiff	SEC26	3640891	XP_717483	1	XP_717391.1	17	16	0.21	21.6		952
MFG1_3 (N-GFP)	MFG1	3643884	XP_714447.2	4738	6280	30890	MFG1_3_BR1_IDA_TOF3_P50	30890_MFG1_3_BR1_IDA_TOF3_P50_Wrong.wiff	HXK2	3640936	XP_717498	1	XP_717405.1	3	3	0.04	6.8		414
MFG1_3 (N-GFP)	MFG1	3643884	XP_714447.2	4738	6280	30890	MFG1_3_BR1_IDA_TOF3_P50	30890_MFG1_3_BR1_IDA_TOF3_P50_Wrong.wiff	CDC10	3640905	XP_717505	1	XP_717411.1	3	3	0.04	12.3		357
MFG1_3 (N-GFP)	MFG1	3643884	XP_714447.2	4738	6280	30890	MFG1_3_BR1_IDA_TOF3_P50	30890_MFG1_3_BR1_IDA_TOF3_P50_Wrong.wiff	IMG2	3641096	XP_717258	1	XP_717182.1	3	3	0.04	25.2		123
MFG1_3 (N-GFP)	MFG1	3643884	XP_714447.2	4738	6280	30890	MFG1_3_BR1_IDA_TOF3_P50	30890_MFG1_3_BR1_IDA_TOF3_P50_Wrong.wiff	RPL24	3641073	XP_717269	1	XP_717194.1	20	6	0.22	36.1		155
MFG1_3 (N-GFP)	MFG1	3643884	XP_714447.2	4738	6280	30890	MFG1_3_BR1_IDA_TOF3_P50	30890_MFG1_3_BR1_IDA_TOF3_P50_Wrong.wiff	MRPL11	3641082	XP_717278	1	XP_717202.1	3	2	0.04	10.9		258
MFG1_3 (N-GFP)	MFG1	3643884	XP_714447.2	4738	6280	30890	MFG1_3_BR1_IDA_TOF3_P50	30890_MFG1_3_BR1_IDA_TOF3_P50_Wrong.wiff	RTN1	3641084	XP_717280	1	XP_717204.1	3	2	0.04	6		366
MFG1_3 (N-GFP)	MFG1	3643884	XP_714447.2	4738	6280	30890	MFG1_3_BR1_IDA_TOF3_P50	30890_MFG1_3_BR1_IDA_TOF3_P50_Wrong.wiff	SSZ1	3641035	XP_717293	1	XP_717217.1	12	8	0.13	26.5		540
MFG1_3 (N-GFP)	MFG1	3643884	XP_714447.2	4738	6280	30890	MFG1_3_BR1_IDA_TOF3_P50	30890_MFG1_3_BR1_IDA_TOF3_P50_Wrong.wiff	ZDS1	3641058	XP_717304	1	XP_717228.1	9	8	0.1	6.4		1645
MFG1_3 (N-GFP)	MFG1	3643884	XP_714447.2	4738	6280	30890	MFG1_3_BR1_IDA_TOF3_P50	30890_MFG1_3_BR1_IDA_TOF3_P50_Wrong.wiff	CaO19.11312	3641090	XP_717311	1	XP_717235.1	11	7	0.13	27.9		276
MFG1_3 (N-GFP)	MFG1	3643884	XP_714447.2	4738	6280	30890	MFG1_3_BR1_IDA_TOF3_P50	30890_MFG1_3_BR1_IDA_TOF3_P50_Wrong.wiff	PDB1	3641186	XP_717098	1	XP_717018.1	3	3	0.04	12.1		379
MFG1_3 (N-GFP)	MFG1	3643884	XP_714447.2	4738	6280	30890	MFG1_3_BR1_IDA_TOF3_P50	30890_MFG1_3_BR1_IDA_TOF3_P50_Wrong.wiff	CaO19.5328	3641202	XP_717131	1	XP_717052.1	6	5	0.07	8.7		677
MFG1_3 (N-GFP)	MFG1	3643884	XP_714447.2	4738	6280	30890	MFG1_3_BR1_IDA_TOF3_P50	30890_MFG1_3_BR1_IDA_TOF3_P50_Wrong.wiff	GCN1	3641256	XP_717136	1	XP_717057.1	17	17	0.2	13.4		1600
MFG1_3 (N-GFP)	MFG1	3643884	XP_714447.2	4738	6280	30890	MFG1_3_BR1_IDA_TOF3_P50	30890_MFG1_3_BR1_IDA_TOF3_P50_Wrong.wiff	TIF11	3641208	XP_717154	1	XP_717075.1	2	2	0.02	13.6		154
MFG1_3 (N-GFP)	MFG1	3643884	XP_714447.2	4738	6280	30890	MFG1_3_BR1_IDA_TOF3_P50	30890_MFG1_3_BR1_IDA_TOF3_P50_Wrong.wiff	CaO19.5126	3641354	XP_716949	1	XP_716881.1; XP_888936.1	5	3	0.04	28.3		184
MFG1_3 (N-GFP)	MFG1	3643884	XP_714447.2	4738	6280	30890	MFG1_3_BR1_IDA_TOF3_P50	30890_MFG1_3_BR1_IDA_TOF3_P50_Wrong.wiff	CAALFM_C703270WA	3641365	XP_716951	1	XP_716883.1; XP_888935.1	5	2	0.05	8.8		397
MFG1_3 (N-GFP)	MFG1	3643884	XP_714447.2	4738	6280	30890	MFG1_3_BR1_IDA_TOF3_P50	30890_MFG1_3_BR1_IDA_TOF3_P50_Wrong.wiff	LMO1	3641403	XP_716970	1	XP_716903.1; XP_888916.1	7	6	0.07	10.7		521
MFG1_3 (N-GFP)	MFG1	3643884	XP_714447.2	4738	6280	30890	MFG1_3_BR1_IDA_TOF3_P50	30890_MFG1_3_BR1_IDA_TOF3_P50_Wrong.wiff	ERG5	3641400	XP_717000	1	XP_716933.1; XP_888893.1	3	3	0.04	6		517
MFG1_3 (N-GFP)	MFG1	3643884	XP_714447.2	4738	6280	30890	MFG1_3_BR1_IDA_TOF3_P50	30890_MFG1_3_BR1_IDA_TOF3_P50_Wrong.wiff	ERG11	3641508	XP_716822	1	XP_716761.1	3	2	0.03	4.4		528
MFG1_3 (N-GFP)	MFG1	3643884	XP_714447.2	4738	6280	30890	MFG1_3_BR1_IDA_TOF3_P50	30890_MFG1_3_BR1_IDA_TOF3_P50_Wrong.wiff	PET9	3641531	XP_716829	1	XP_716769.1	31	11	0.36	38.2		301
MFG1_3 (N-GFP)	MFG1	3643884	XP_714447.2	4738	6280	30890	MFG1_3_BR1_IDA_TOF3_P50	30890_MFG1_3_BR1_IDA_TOF3_P50_Wrong.wiff	NAM7	3641489	XP_716838	1	XP_716778.1	7	7	0.09	10.5		1019
MFG1_3 (N-GFP)	MFG1	3643884	XP_714447.2	4738	6280	30890	MFG1_3_BR1_IDA_TOF3_P50	30890_MFG1_3_BR1_IDA_TOF3_P50_Wrong.wiff	SEC14	3641491	XP_716840	1	XP_716780.1	7	5	0.08	18.3		301
MFG1_3 (N-GFP)	MFG1	3643884	XP_714447.2	4738	6280	30890	MFG1_3_BR1_IDA_TOF3_P50	30890_MFG1_3_BR1_IDA_TOF3_P50_Wrong.wiff	XDJ1	3641478	XP_716852	1	XP_716792.1	6	4	0.06	10		439
MFG1_3 (N-GFP)	MFG1	3643884	XP_714447.2	4738	6280	30890	MFG1_3_BR1_IDA_TOF3_P50	30890_MFG1_3_BR1_IDA_TOF3_P50_Wrong.wiff	CaO19.8591	3641504	XP_716874	1	XP_716814.1	7	6	0.09	11.7		681
MFG1_3 (N-GFP)	MFG1	3643884	XP_714447.2	4738	6280	30890	MFG1_3_BR1_IDA_TOF3_P50	30890_MFG1_3_BR1_IDA_TOF3_P50_Wrong.wiff	BDF1	3641493	XP_716876	1	XP_716816.1	4	3	0.05	4		732
MFG1_3 (N-GFP)	MFG1	3643884	XP_714447.2	4738	6280	30890	MFG1_3_BR1_IDA_TOF3_P50	30890_MFG1_3_BR1_IDA_TOF3_P50_Wrong.wiff	FAS1	3641494	XP_716877	1	XP_716817.1	18	16	0.22	10		2037
MFG1_3 (N-GFP)	MFG1	3643884	XP_714447.2	4738	6280	30890	MFG1_3_BR1_IDA_TOF3_P50	30890_MFG1_3_BR1_IDA_TOF3_P50_Wrong.wiff	CAALFM_C601890CA	3641598	XP_716703	1	XP_716643.1	10	7	0.1	12		574
MFG1_3 (N-GFP)	MFG1	3643884	XP_714447.2	4738	6280	30890	MFG1_3_BR1_IDA_TOF3_P50	30890_MFG1_3_BR1_IDA_TOF3_P50_Wrong.wiff	TIF3	3641646	XP_716731	1	XP_716672.1	11	7	0.11	19.3		455
MFG1_3 (N-GFP)	MFG1	3643884	XP_714447.2	4738	6280	30890	MFG1_3_BR1_IDA_TOF3_P50	30890_MFG1_3_BR1_IDA_TOF3_P50_Wrong.wiff	ANB1	3641648	XP_716733	1	XP_716674.1	8	5	0.1	40.6		138
MFG1_3 (N-GFP)	MFG1	3643884	XP_714447.2	4738	6280	30890	MFG1_3_BR1_IDA_TOF3_P50	30890_MFG1_3_BR1_IDA_TOF3_P50_Wrong.wiff	CAALFM_C601590WA	3641650	XP_716735	1	XP_716676.1	5	3	0.05	6.9		493
MFG1_3 (N-GFP)	MFG1	3643884	XP_714447.2	4738	6280	30890	MFG1_3_BR1_IDA_TOF3_P50	30890_MFG1_3_BR1_IDA_TOF3_P50_Wrong.wiff	TRA1	3641644	XP_716758	1	XP_716699.1	2	2	0.02	0.9		2284
MFG1_3 (N-GFP)	MFG1	3643884	XP_714447.2	4738	6280	30890	MFG1_3_BR1_IDA_TOF3_P50	30890_MFG1_3_BR1_IDA_TOF3_P50_Wrong.wiff	RCT1	3641727	XP_716591	1		2	2	0.02	20.4		191
MFG1_3 (N-GFP)	MFG1	3643884	XP_714447.2	4738	6280	30890	MFG1_3_BR1_IDA_TOF3_P50	30890_MFG1_3_BR1_IDA_TOF3_P50_Wrong.wiff	CAALFM_C305880CA	3641737	XP_716609	1		3	2	0.03	5.9		510
MFG1_3 (N-GFP)	MFG1	3643884	XP_714447.2	4738	6280	30890	MFG1_3_BR1_IDA_TOF3_P50	30890_MFG1_3_BR1_IDA_TOF3_P50_Wrong.wiff	NOG1	3641736	XP_716625	1		40	25	0.45	39.7		640
MFG1_3 (N-GFP)	MFG1	3643884	XP_714447.2	4738	6280	30890	MFG1_3_BR1_IDA_TOF3_P50	30890_MFG1_3_BR1_IDA_TOF3_P50_Wrong.wiff	PBS2	3641748	XP_716629	1		7	7	0.08	14.7		545
MFG1_3 (N-GFP)	MFG1	3643884	XP_714447.2	4738	6280	30890	MFG1_3_BR1_IDA_TOF3_P50	30890_MFG1_3_BR1_IDA_TOF3_P50_Wrong.wiff	DED1	3641752	XP_716633	1		128	28	1.34	57.7		672
MFG1_3 (N-GFP)	MFG1	3643884	XP_714447.2	4738	6280	30890	MFG1_3_BR1_IDA_TOF3_P50	30890_MFG1_3_BR1_IDA_TOF3_P50_Wrong.wiff	CaO19.1226	3641798	XP_716534	1	XP_716480.1	7	6	0.08	13		531
MFG1_3 (N-GFP)	MFG1	3643884	XP_714447.2	4738	6280	30890	MFG1_3_BR1_IDA_TOF3_P50	30890_MFG1_3_BR1_IDA_TOF3_P50_Wrong.wiff	CAALFM_C107690CA	3641767	XP_716539	1	XP_716484.1	6	6	0.07	13.5		452
MFG1_3 (N-GFP)	MFG1	3643884	XP_714447.2	4738	6280	30890	MFG1_3_BR1_IDA_TOF3_P50	30890_MFG1_3_BR1_IDA_TOF3_P50_Wrong.wiff	CAALFM_CR09110CA	3641929	XP_716441	1		3	3	0.03	10.5		285
MFG1_3 (N-GFP)	MFG1	3643884	XP_714447.2	4738	6280	30890	MFG1_3_BR1_IDA_TOF3_P50	30890_MFG1_3_BR1_IDA_TOF3_P50_Wrong.wiff	TUB1	3641930	XP_716442	1		20	7	0.24	27.6		323
MFG1_3 (N-GFP)	MFG1	3643884	XP_714447.2	4738	6280	30890	MFG1_3_BR1_IDA_TOF3_P50	30890_MFG1_3_BR1_IDA_TOF3_P50_Wrong.wiff	ERG13	3641881	XP_716446	1		6	5	0.07	18.2		451
MFG1_3 (N-GFP)	MFG1	3643884	XP_714447.2	4738	6280	30890	MFG1_3_BR1_IDA_TOF3_P50	30890_MFG1_3_BR1_IDA_TOF3_P50_Wrong.wiff	CAALFM_CR09240CA	3641919	XP_716456	1		3	3	0.03	25.2		147
MFG1_3 (N-GFP)	MFG1	3643884	XP_714447.2	4738	6280	30890	MFG1_3_BR1_IDA_TOF3_P50	30890_MFG1_3_BR1_IDA_TOF3_P50_Wrong.wiff	ELF1	3641903	XP_716466	1		30	18	0.32	21.6		1195
MFG1_3 (N-GFP)	MFG1	3643884	XP_714447.2	4738	6280	30890	MFG1_3_BR1_IDA_TOF3_P50	30890_MFG1_3_BR1_IDA_TOF3_P50_Wrong.wiff	BRX1	3641959	XP_716363	1	XP_716301.1	4	3	0.05	10.6		292
MFG1_3 (N-GFP)	MFG1	3643884	XP_714447.2	4738	6280	30890	MFG1_3_BR1_IDA_TOF3_P50	30890_MFG1_3_BR1_IDA_TOF3_P50_Wrong.wiff	RPN2	3641945	XP_716391	1	XP_716329.1	7	7	0.08	8.9		952
MFG1_3 (N-GFP)	MFG1	3643884	XP_714447.2	4738	6280	30890	MFG1_3_BR1_IDA_TOF3_P50	30890_MFG1_3_BR1_IDA_TOF3_P50_Wrong.wiff	SSB1	3642095	XP_716208	1	XP_716124.1	86	25	1.05	51.9		613
MFG1_3 (N-GFP)	MFG1	3643884	XP_714447.2	4738	6280	30890	MFG1_3_BR1_IDA_TOF3_P50	30890_MFG1_3_BR1_IDA_TOF3_P50_Wrong.wiff	RPS20	3642071	XP_716215	1	XP_716131.1	4	3	0.05	26.9		119
MFG1_3 (N-GFP)	MFG1	3643884	XP_714447.2	4738	6280	30890	MFG1_3_BR1_IDA_TOF3_P50	30890_MFG1_3_BR1_IDA_TOF3_P50_Wrong.wiff	ACO1	3642090	XP_716225	1	XP_716141.1	2	2	0.02	3.2		777
MFG1_3 (N-GFP)	MFG1	3643884	XP_714447.2	4738	6280	30890	MFG1_3_BR1_IDA_TOF3_P50	30890_MFG1_3_BR1_IDA_TOF3_P50_Wrong.wiff	CAALFM_CR08440WA	3642132	XP_716252	1	XP_716169.1	2	2	0.02	4.4		617
MFG1_3 (N-GFP)	MFG1	3643884	XP_714447.2	4738	6280	30890	MFG1_3_BR1_IDA_TOF3_P50	30890_MFG1_3_BR1_IDA_TOF3_P50_Wrong.wiff	CAALFM_C306280WA	3642238	XP_716069	1		5	4	0.06	16.3		332
MFG1_3 (N-GFP)	MFG1	3643884	XP_714447.2	4738	6280	30890	MFG1_3_BR1_IDA_TOF3_P50	30890_MFG1_3_BR1_IDA_TOF3_P50_Wrong.wiff	TSA1	3642269	XP_716082	1		10	6	0.12	37.2		196
MFG1_3 (N-GFP)	MFG1	3643884	XP_714447.2	4738	6280	30890	MFG1_3_BR1_IDA_TOF3_P50	30890_MFG1_3_BR1_IDA_TOF3_P50_Wrong.wiff	APN1	3642263	XP_716092	1		2	2	0.02	9.8		336
MFG1_3 (N-GFP)	MFG1	3643884	XP_714447.2	4738	6280	30890	MFG1_3_BR1_IDA_TOF3_P50	30890_MFG1_3_BR1_IDA_TOF3_P50_Wrong.wiff	CAALFM_C306700CA	3642247	XP_716120	1		7	6	0.09	11.3		613
MFG1_3 (N-GFP)	MFG1	3643884	XP_714447.2	4738	6280	30890	MFG1_3_BR1_IDA_TOF3_P50	30890_MFG1_3_BR1_IDA_TOF3_P50_Wrong.wiff	KRE30	3642311	XP_716024	1	XP_715966.1	20	13	0.25	24.6		609
MFG1_3 (N-GFP)	MFG1	3643884	XP_714447.2	4738	6280	30890	MFG1_3_BR1_IDA_TOF3_P50	30890_MFG1_3_BR1_IDA_TOF3_P50_Wrong.wiff	NSA1	3642313	XP_716026	1	XP_715968.1	13	10	0.16	29.6		406
MFG1_3 (N-GFP)	MFG1	3643884	XP_714447.2	4738	6280	30890	MFG1_3_BR1_IDA_TOF3_P50	30890_MFG1_3_BR1_IDA_TOF3_P50_Wrong.wiff	CAALFM_C207680WA	3642339	XP_716054	1	XP_715995.1	2	2	0.02	8.7		287
MFG1_3 (N-GFP)	MFG1	3643884	XP_714447.2	4738	6280	30890	MFG1_3_BR1_IDA_TOF3_P50	30890_MFG1_3_BR1_IDA_TOF3_P50_Wrong.wiff	GRS1	3642434	XP_715922	1	XP_715872.1	3	2	0.04	4.3		652
MFG1_3 (N-GFP)	MFG1	3643884	XP_714447.2	4738	6280	30890	MFG1_3_BR1_IDA_TOF3_P50	30890_MFG1_3_BR1_IDA_TOF3_P50_Wrong.wiff	RPT1	3642412	XP_715926	1	XP_715876.1	4	4	0.05	9.9		444
MFG1_3 (N-GFP)	MFG1	3643884	XP_714447.2	4738	6280	30890	MFG1_3_BR1_IDA_TOF3_P50	30890_MFG1_3_BR1_IDA_TOF3_P50_Wrong.wiff	SRP40	3642538	XP_715840	1	XP_715790.1	70	10	0.82	24.6		378
MFG1_3 (N-GFP)	MFG1	3643884	XP_714447.2	4738	6280	30890	MFG1_3_BR1_IDA_TOF3_P50	30890_MFG1_3_BR1_IDA_TOF3_P50_Wrong.wiff	SNF1	3642643	XP_715699	1	XP_715642.1	7	5	0.07	10.4		618
MFG1_3 (N-GFP)	MFG1	3643884	XP_714447.2	4738	6280	30890	MFG1_3_BR1_IDA_TOF3_P50	30890_MFG1_3_BR1_IDA_TOF3_P50_Wrong.wiff	VPS1	3642656	XP_715712	1	XP_715656.1	13	9	0.15	13.9		693
MFG1_3 (N-GFP)	MFG1	3643884	XP_714447.2	4738	6280	30890	MFG1_3_BR1_IDA_TOF3_P50	30890_MFG1_3_BR1_IDA_TOF3_P50_Wrong.wiff	CAALFM_C501050CA	3642648	XP_715729	1	XP_715673.1	2	2	0.02	13.3		158
MFG1_3 (N-GFP)	MFG1	3643884	XP_714447.2	4738	6280	30890	MFG1_3_BR1_IDA_TOF3_P50	30890_MFG1_3_BR1_IDA_TOF3_P50_Wrong.wiff	TOP2	3642722	XP_715586	1	XP_715530.1	3	2	0.03	2.1		1461
MFG1_3 (N-GFP)	MFG1	3643884	XP_714447.2	4738	6280	30890	MFG1_3_BR1_IDA_TOF3_P50	30890_MFG1_3_BR1_IDA_TOF3_P50_Wrong.wiff	CaO19.10395	3642725	XP_715589	1	XP_715533.1	25	14	0.3	40		567
MFG1_3 (N-GFP)	MFG1	3643884	XP_714447.2	4738	6280	30890	MFG1_3_BR1_IDA_TOF3_P50	30890_MFG1_3_BR1_IDA_TOF3_P50_Wrong.wiff	SPT16	3642741	XP_715596	1	XP_715540.1	6	5	0.05	6		1060
MFG1_3 (N-GFP)	MFG1	3643884	XP_714447.2	4738	6280	30890	MFG1_3_BR1_IDA_TOF3_P50	30890_MFG1_3_BR1_IDA_TOF3_P50_Wrong.wiff	CaO19.10434	3642767	XP_715626	1	XP_715571.1	12	8	0.13	21.3		526
MFG1_3 (N-GFP)	MFG1	3643884	XP_714447.2	4738	6280	30890	MFG1_3_BR1_IDA_TOF3_P50	30890_MFG1_3_BR1_IDA_TOF3_P50_Wrong.wiff	PDA1	3642880	XP_715476	1	XP_715406.1	3	3	0.04	8.7		401
MFG1_3 (N-GFP)	MFG1	3643884	XP_714447.2	4738	6280	30890	MFG1_3_BR1_IDA_TOF3_P50	30890_MFG1_3_BR1_IDA_TOF3_P50_Wrong.wiff	CCT6	3642861	XP_715505	1	XP_715435.1	3	3	0.04	7.9		559
MFG1_3 (N-GFP)	MFG1	3643884	XP_714447.2	4738	6280	30890	MFG1_3_BR1_IDA_TOF3_P50	30890_MFG1_3_BR1_IDA_TOF3_P50_Wrong.wiff	RVB1	3642864	XP_715508	1	XP_715438.1	4	4	0.05	11.6		458
MFG1_3 (N-GFP)	MFG1	3643884	XP_714447.2	4738	6280	30890	MFG1_3_BR1_IDA_TOF3_P50	30890_MFG1_3_BR1_IDA_TOF3_P50_Wrong.wiff	NOP1	3642887	XP_715517	1	XP_715447.1	351	20	4.18	57		316
MFG1_3 (N-GFP)	MFG1	3643884	XP_714447.2	4738	6280	30890	MFG1_3_BR1_IDA_TOF3_P50	30890_MFG1_3_BR1_IDA_TOF3_P50_Wrong.wiff	RNR1	3642989	XP_715320	1	XP_715255.1	4	4	0.05	5.2		854
MFG1_3 (N-GFP)	MFG1	3643884	XP_714447.2	4738	6280	30890	MFG1_3_BR1_IDA_TOF3_P50	30890_MFG1_3_BR1_IDA_TOF3_P50_Wrong.wiff	EFT2	3642998	XP_715329	1	XP_715264.1	38	21	0.44	31.7		830
MFG1_3 (N-GFP)	MFG1	3643884	XP_714447.2	4738	6280	30890	MFG1_3_BR1_IDA_TOF3_P50	30890_MFG1_3_BR1_IDA_TOF3_P50_Wrong.wiff	IDH2	3642979	XP_715332	1	XP_715267.1	6	5	0.07	23		369
MFG1_3 (N-GFP)	MFG1	3643884	XP_714447.2	4738	6280	30890	MFG1_3_BR1_IDA_TOF3_P50	30890_MFG1_3_BR1_IDA_TOF3_P50_Wrong.wiff	PR26	3642981	XP_715334	1	XP_715269.1	6	4	0.06	16.1		411
MFG1_3 (N-GFP)	MFG1	3643884	XP_714447.2	4738	6280	30890	MFG1_3_BR1_IDA_TOF3_P50	30890_MFG1_3_BR1_IDA_TOF3_P50_Wrong.wiff	RNR21	3643021	XP_715342	1	XP_715277.1	4	4	0.05	11.4		413
MFG1_3 (N-GFP)	MFG1	3643884	XP_714447.2	4738	6280	30890	MFG1_3_BR1_IDA_TOF3_P50	30890_MFG1_3_BR1_IDA_TOF3_P50_Wrong.wiff	ALD5	3643026	XP_715347	1	XP_715282.1	5	3	0.05	11.6		499
MFG1_3 (N-GFP)	MFG1	3643884	XP_714447.2	4738	6280	30890	MFG1_3_BR1_IDA_TOF3_P50	30890_MFG1_3_BR1_IDA_TOF3_P50_Wrong.wiff	CAALFM_C202770WA	3643031	XP_715369	1	XP_715304.1	9	8	0.11	13.9		717
MFG1_3 (N-GFP)	MFG1	3643884	XP_714447.2	4738	6280	30890	MFG1_3_BR1_IDA_TOF3_P50	30890_MFG1_3_BR1_IDA_TOF3_P50_Wrong.wiff	CAALFM_C202720WA	3643002	XP_715374	1	XP_715309.1	6	4	0.07	5.3		1002
MFG1_3 (N-GFP)	MFG1	3643884	XP_714447.2	4738	6280	30890	MFG1_3_BR1_IDA_TOF3_P50	30890_MFG1_3_BR1_IDA_TOF3_P50_Wrong.wiff	SPT6	3643171	XP_715187	1	XP_889033.1	14	13	0.16	11.1		1401
MFG1_3 (N-GFP)	MFG1	3643884	XP_714447.2	4738	6280	30890	MFG1_3_BR1_IDA_TOF3_P50	30890_MFG1_3_BR1_IDA_TOF3_P50_Wrong.wiff	CAALFM_C704200CA	3643122	XP_715202	1	XP_889023.1	2	2	0.02	2.1		1025
MFG1_3 (N-GFP)	MFG1	3643884	XP_714447.2	4738	6280	30890	MFG1_3_BR1_IDA_TOF3_P50	30890_MFG1_3_BR1_IDA_TOF3_P50_Wrong.wiff	SUI3	3643130	XP_715210	1	XP_889016.1	12	7	0.15	33.8		281
MFG1_3 (N-GFP)	MFG1	3643884	XP_714447.2	4738	6280	30890	MFG1_3_BR1_IDA_TOF3_P50	30890_MFG1_3_BR1_IDA_TOF3_P50_Wrong.wiff	MAM33	3643103	XP_715236	1	XP_888998.1	3	3	0.04	18.9		264
MFG1_3 (N-GFP)	MFG1	3643884	XP_714447.2	4738	6280	30890	MFG1_3_BR1_IDA_TOF3_P50	30890_MFG1_3_BR1_IDA_TOF3_P50_Wrong.wiff	CAALFM_C703850WA	3643145	XP_715245	1	XP_888990.1	7	6	0.08	15		745
MFG1_3 (N-GFP)	MFG1	3643884	XP_714447.2	4738	6280	30890	MFG1_3_BR1_IDA_TOF3_P50	30890_MFG1_3_BR1_IDA_TOF3_P50_Wrong.wiff	SLA2	3643149	XP_715249	1	XP_888986.1	3	3	0.04	4		1063
MFG1_3 (N-GFP)	MFG1	3643884	XP_714447.2	4738	6280	30890	MFG1_3_BR1_IDA_TOF3_P50	30890_MFG1_3_BR1_IDA_TOF3_P50_Wrong.wiff	TAL1	3643225	XP_715147	1	XP_715096.1	2	2	0.02	6.5		323
MFG1_3 (N-GFP)	MFG1	3643884	XP_714447.2	4738	6280	30890	MFG1_3_BR1_IDA_TOF3_P50	30890_MFG1_3_BR1_IDA_TOF3_P50_Wrong.wiff	CIT1	3643201	XP_715169	1	XP_715118.1	7	7	0.09	21.7		397
MFG1_3 (N-GFP)	MFG1	3643884	XP_714447.2	4738	6280	30890	MFG1_3_BR1_IDA_TOF3_P50	30890_MFG1_3_BR1_IDA_TOF3_P50_Wrong.wiff	CAALFM_C114080WA	3643345	XP_715016	1		17	17	0.21	11.8		1818
MFG1_3 (N-GFP)	MFG1	3643884	XP_714447.2	4738	6280	30890	MFG1_3_BR1_IDA_TOF3_P50	30890_MFG1_3_BR1_IDA_TOF3_P50_Wrong.wiff	RPL4B	3643347	XP_715018	1		40	13	0.47	52.6		363
MFG1_3 (N-GFP)	MFG1	3643884	XP_714447.2	4738	6280	30890	MFG1_3_BR1_IDA_TOF3_P50	30890_MFG1_3_BR1_IDA_TOF3_P50_Wrong.wiff	CAALFM_C114240WA	3643306	XP_715034	1		7	7	0.08	15.7		561
MFG1_3 (N-GFP)	MFG1	3643884	XP_714447.2	4738	6280	30890	MFG1_3_BR1_IDA_TOF3_P50	30890_MFG1_3_BR1_IDA_TOF3_P50_Wrong.wiff	TIF35	3643308	XP_715036	1		4	4	0.05	24.7		279
MFG1_3 (N-GFP)	MFG1	3643884	XP_714447.2	4738	6280	30890	MFG1_3_BR1_IDA_TOF3_P50	30890_MFG1_3_BR1_IDA_TOF3_P50_Wrong.wiff	NPL3	3643310	XP_715038	1		245	12	2.95	42.7		286
MFG1_3 (N-GFP)	MFG1	3643884	XP_714447.2	4738	6280	30890	MFG1_3_BR1_IDA_TOF3_P50	30890_MFG1_3_BR1_IDA_TOF3_P50_Wrong.wiff	MAK5	3643358	XP_714962	1	XP_714899.1	11	7	0.12	13.4		782
MFG1_3 (N-GFP)	MFG1	3643884	XP_714447.2	4738	6280	30890	MFG1_3_BR1_IDA_TOF3_P50	30890_MFG1_3_BR1_IDA_TOF3_P50_Wrong.wiff	SUP45	3643359	XP_714963	1	XP_714900.1	18	11	0.22	32.6		436
MFG1_3 (N-GFP)	MFG1	3643884	XP_714447.2	4738	6280	30890	MFG1_3_BR1_IDA_TOF3_P50	30890_MFG1_3_BR1_IDA_TOF3_P50_Wrong.wiff	NUP133	3643393	XP_714973	1	XP_714911.1	3	3	0.04	4.2		1032
MFG1_3 (N-GFP)	MFG1	3643884	XP_714447.2	4738	6280	30890	MFG1_3_BR1_IDA_TOF3_P50	30890_MFG1_3_BR1_IDA_TOF3_P50_Wrong.wiff	RPF2	3643394	XP_714974	1	XP_714912.1	11	8	0.12	23.9		327
MFG1_3 (N-GFP)	MFG1	3643884	XP_714447.2	4738	6280	30890	MFG1_3_BR1_IDA_TOF3_P50	30890_MFG1_3_BR1_IDA_TOF3_P50_Wrong.wiff	ERP3	3643400	XP_714980	1	XP_714917.1	2	2	0.02	9.9		213
MFG1_3 (N-GFP)	MFG1	3643884	XP_714447.2	4738	6280	30890	MFG1_3_BR1_IDA_TOF3_P50	30890_MFG1_3_BR1_IDA_TOF3_P50_Wrong.wiff	MRPS35	3643378	XP_714982	1	XP_714919.1	3	2	0.03	11.3		168
MFG1_3 (N-GFP)	MFG1	3643884	XP_714447.2	4738	6280	30890	MFG1_3_BR1_IDA_TOF3_P50	30890_MFG1_3_BR1_IDA_TOF3_P50_Wrong.wiff	RPC40	3643382	XP_714986	1	XP_714923.1	3	3	0.03	6.5		369
MFG1_3 (N-GFP)	MFG1	3643884	XP_714447.2	4738	6280	30890	MFG1_3_BR1_IDA_TOF3_P50	30890_MFG1_3_BR1_IDA_TOF3_P50_Wrong.wiff	CDC19	3643409	XP_714997	1	XP_714934.1	35	15	0.42	36.9		504
MFG1_3 (N-GFP)	MFG1	3643884	XP_714447.2	4738	6280	30890	MFG1_3_BR1_IDA_TOF3_P50	30890_MFG1_3_BR1_IDA_TOF3_P50_Wrong.wiff	ATP4	3643388	XP_715001	1	XP_714938.1	5	4	0.06	21.5		233
MFG1_3 (N-GFP)	MFG1	3643884	XP_714447.2	4738	6280	30890	MFG1_3_BR1_IDA_TOF3_P50	30890_MFG1_3_BR1_IDA_TOF3_P50_Wrong.wiff	RPL11	3643489	XP_714823	1	XP_714763.1	19	7	0.23	30.1		166
MFG1_3 (N-GFP)	MFG1	3643884	XP_714447.2	4738	6280	30890	MFG1_3_BR1_IDA_TOF3_P50	30890_MFG1_3_BR1_IDA_TOF3_P50_Wrong.wiff	CAALFM_C207030CA	3643498	XP_714849	1	XP_714787.1	3	3	0.04	12.9		271
MFG1_3 (N-GFP)	MFG1	3643884	XP_714447.2	4738	6280	30890	MFG1_3_BR1_IDA_TOF3_P50	30890_MFG1_3_BR1_IDA_TOF3_P50_Wrong.wiff	CAALFM_C207100WA	3643504	XP_714855	1	XP_714793.1	3	3	0.04	6.4		469
MFG1_3 (N-GFP)	MFG1	3643884	XP_714447.2	4738	6280	30890	MFG1_3_BR1_IDA_TOF3_P50	30890_MFG1_3_BR1_IDA_TOF3_P50_Wrong.wiff	ACH1	3643603	XP_714720	1	XP_714589.1	10	10	0.11	25.4		524
MFG1_3 (N-GFP)	MFG1	3643884	XP_714447.2	4738	6280	30890	MFG1_3_BR1_IDA_TOF3_P50	30890_MFG1_3_BR1_IDA_TOF3_P50_Wrong.wiff	NAT1	3643641	XP_714733	1	XP_714602.1	6	6	0.07	9.1		782
MFG1_3 (N-GFP)	MFG1	3643884	XP_714447.2	4738	6280	30890	MFG1_3_BR1_IDA_TOF3_P50	30890_MFG1_3_BR1_IDA_TOF3_P50_Wrong.wiff	CCT7	3643626	XP_714755	1	XP_714622.1	12	8	0.12	23.7		549
MFG1_3 (N-GFP)	MFG1	3643884	XP_714447.2	4738	6280	30890	MFG1_3_BR1_IDA_TOF3_P50	30890_MFG1_3_BR1_IDA_TOF3_P50_Wrong.wiff	YST1	3643678	XP_714681	1		3	3	0.04	16.1		217
MFG1_3 (N-GFP)	MFG1	3643884	XP_714447.2	4738	6280	30890	MFG1_3_BR1_IDA_TOF3_P50	30890_MFG1_3_BR1_IDA_TOF3_P50_Wrong.wiff	DNM1	3643673	XP_714693	1		5	5	0.05	8.4		866
MFG1_3 (N-GFP)	MFG1	3643884	XP_714447.2	4738	6280	30890	MFG1_3_BR1_IDA_TOF3_P50	30890_MFG1_3_BR1_IDA_TOF3_P50_Wrong.wiff	SUP35	3643722	XP_714648	1	XP_714552.1	7	7	0.08	14.4		721
MFG1_3 (N-GFP)	MFG1	3643884	XP_714447.2	4738	6280	30890	MFG1_3_BR1_IDA_TOF3_P50	30890_MFG1_3_BR1_IDA_TOF3_P50_Wrong.wiff	CaO19.8966	3643728	XP_714654	1	XP_714560.1	12	7	0.12	38.1		218
MFG1_3 (N-GFP)	MFG1	3643884	XP_714447.2	4738	6280	30890	MFG1_3_BR1_IDA_TOF3_P50	30890_MFG1_3_BR1_IDA_TOF3_P50_Wrong.wiff	CCT2	3643685	XP_714667	1	XP_714573.1	2	2	0.02	6.8		526
MFG1_3 (N-GFP)	MFG1	3643884	XP_714447.2	4738	6280	30890	MFG1_3_BR1_IDA_TOF3_P50	30890_MFG1_3_BR1_IDA_TOF3_P50_Wrong.wiff	RPT6	3643827	XP_714488	1	XP_714440.1	10	7	0.11	25.9		401
MFG1_3 (N-GFP)	MFG1	3643884	XP_714447.2	4738	6280	30890	MFG1_3_BR1_IDA_TOF3_P50	30890_MFG1_3_BR1_IDA_TOF3_P50_Wrong.wiff	TIF46	3643830	XP_714491	1		13	2	0.09	18.8		617
MFG1_3 (N-GFP)	MFG1	3643884	XP_714447.2	4738	6280	30890	MFG1_3_BR1_IDA_TOF3_P50	30890_MFG1_3_BR1_IDA_TOF3_P50_Wrong.wiff	CaO19.11086	3643841	XP_714496	1	XP_714447.1	143	25	1.69	43.4		758
MFG1_3 (N-GFP)	MFG1	3643884	XP_714447.2	4738	6280	30890	MFG1_3_BR1_IDA_TOF3_P50	30890_MFG1_3_BR1_IDA_TOF3_P50_Wrong.wiff	CaO19.11092	3643847	XP_714502	1	XP_714453.1	3	2	0.04	6.1		423
MFG1_3 (N-GFP)	MFG1	3643884	XP_714447.2	4738	6280	30890	MFG1_3_BR1_IDA_TOF3_P50	30890_MFG1_3_BR1_IDA_TOF3_P50_Wrong.wiff	TIF4631	3643880	XP_714443	1		27	15	0.15	20.4		1084
MFG1_3 (N-GFP)	MFG1	3643884	XP_714447.2	4738	6280	30890	MFG1_3_BR1_IDA_TOF3_P50	30890_MFG1_3_BR1_IDA_TOF3_P50_Wrong.wiff	SET2	3643923	XP_714401	1	XP_714361.1	10	8	0.11	12.9		844
MFG1_3 (N-GFP)	MFG1	3643884	XP_714447.2	4738	6280	30890	MFG1_3_BR1_IDA_TOF3_P50	30890_MFG1_3_BR1_IDA_TOF3_P50_Wrong.wiff	GPD1	3643924	XP_714402	1	XP_714362.1	3	3	0.04	11.4		403
MFG1_3 (N-GFP)	MFG1	3643884	XP_714447.2	4738	6280	30890	MFG1_3_BR1_IDA_TOF3_P50	30890_MFG1_3_BR1_IDA_TOF3_P50_Wrong.wiff	CYC1	3643937	XP_714415	1	XP_714375.1	8	5	0.1	32.7		110
MFG1_3 (N-GFP)	MFG1	3643884	XP_714447.2	4738	6280	30890	MFG1_3_BR1_IDA_TOF3_P50	30890_MFG1_3_BR1_IDA_TOF3_P50_Wrong.wiff	CAALFM_C210090CA	3643939	XP_714417	1	XP_714377.1	2	2	0.02	2.4		984
MFG1_3 (N-GFP)	MFG1	3643884	XP_714447.2	4738	6280	30890	MFG1_3_BR1_IDA_TOF3_P50	30890_MFG1_3_BR1_IDA_TOF3_P50_Wrong.wiff	GPX2	3644009	XP_714294	1	XP_714017.1	5	3	0.06	19.6		163
MFG1_3 (N-GFP)	MFG1	3643884	XP_714447.2	4738	6280	30890	MFG1_3_BR1_IDA_TOF3_P50	30890_MFG1_3_BR1_IDA_TOF3_P50_Wrong.wiff	TOP1	3644034	XP_714305	1	XP_714029.1	8	7	0.09	8.2		780
MFG1_3 (N-GFP)	MFG1	3643884	XP_714447.2	4738	6280	30890	MFG1_3_BR1_IDA_TOF3_P50	30890_MFG1_3_BR1_IDA_TOF3_P50_Wrong.wiff	SLP2	3644091	XP_714250	1	XP_714112.1	2	2	0.02	10.3		263
MFG1_3 (N-GFP)	MFG1	3643884	XP_714447.2	4738	6280	30890	MFG1_3_BR1_IDA_TOF3_P50	30890_MFG1_3_BR1_IDA_TOF3_P50_Wrong.wiff	PES1	3644105	XP_714264	1	XP_714126.1	30	19	0.34	34.2		587
MFG1_3 (N-GFP)	MFG1	3643884	XP_714447.2	4738	6280	30890	MFG1_3_BR1_IDA_TOF3_P50	30890_MFG1_3_BR1_IDA_TOF3_P50_Wrong.wiff	ECM17	3644077	XP_714270	1	XP_714132.1	6	5	0.07	7.6		874
MFG1_3 (N-GFP)	MFG1	3643884	XP_714447.2	4738	6280	30890	MFG1_3_BR1_IDA_TOF3_P50	30890_MFG1_3_BR1_IDA_TOF3_P50_Wrong.wiff	CaO19.7771	3644330	XP_714055	1		13	9	0.08	30.3		393
MFG1_3 (N-GFP)	MFG1	3643884	XP_714447.2	4738	6280	30890	MFG1_3_BR1_IDA_TOF3_P50	30890_MFG1_3_BR1_IDA_TOF3_P50_Wrong.wiff	CaO19.9855	3644340	XP_713982	1	XP_713924.1	8	6	0.08	11.3		672
MFG1_3 (N-GFP)	MFG1	3643884	XP_714447.2	4738	6280	30890	MFG1_3_BR1_IDA_TOF3_P50	30890_MFG1_3_BR1_IDA_TOF3_P50_Wrong.wiff	UTP6	3644384	XP_713993	1	XP_713935.1	3	3	0.04	9.3		431
MFG1_3 (N-GFP)	MFG1	3643884	XP_714447.2	4738	6280	30890	MFG1_3_BR1_IDA_TOF3_P50	30890_MFG1_3_BR1_IDA_TOF3_P50_Wrong.wiff	CDC48	3644394	XP_714003	1	XP_713945.1	10	9	0.09	15.6		826
MFG1_3 (N-GFP)	MFG1	3643884	XP_714447.2	4738	6280	30890	MFG1_3_BR1_IDA_TOF3_P50	30890_MFG1_3_BR1_IDA_TOF3_P50_Wrong.wiff	SAM2	3644506	XP_713829	1	XP_713791.1	2	2	0.02	6.8		385
MFG1_3 (N-GFP)	MFG1	3643884	XP_714447.2	4738	6280	30890	MFG1_3_BR1_IDA_TOF3_P50	30890_MFG1_3_BR1_IDA_TOF3_P50_Wrong.wiff	KRR1	3644522	XP_713834	1	XP_713795.1	5	5	0.05	13.7		358
MFG1_3 (N-GFP)	MFG1	3643884	XP_714447.2	4738	6280	30890	MFG1_3_BR1_IDA_TOF3_P50	30890_MFG1_3_BR1_IDA_TOF3_P50_Wrong.wiff	GIN4	3644524	XP_713836	1	XP_713796.1	3	2	0.04	2		1349
MFG1_3 (N-GFP)	MFG1	3643884	XP_714447.2	4738	6280	30890	MFG1_3_BR1_IDA_TOF3_P50	30890_MFG1_3_BR1_IDA_TOF3_P50_Wrong.wiff	GGC1	3644497	XP_713859	1	XP_713818.1	6	5	0.07	27.3		304
MFG1_3 (N-GFP)	MFG1	3643884	XP_714447.2	4738	6280	30890	MFG1_3_BR1_IDA_TOF3_P50	30890_MFG1_3_BR1_IDA_TOF3_P50_Wrong.wiff	2018-09-07	3644596	XP_713774	1	XP_713740.1	3	3	0.04	4.5		670
MFG1_3 (N-GFP)	MFG1	3643884	XP_714447.2	4738	6280	30890	MFG1_3_BR1_IDA_TOF3_P50	30890_MFG1_3_BR1_IDA_TOF3_P50_Wrong.wiff	CAALFM_C102240WA	3644597	XP_713775	1	XP_713741.1	8	7	0.09	11.9		875
MFG1_3 (N-GFP)	MFG1	3643884	XP_714447.2	4738	6280	30890	MFG1_3_BR1_IDA_TOF3_P50	30890_MFG1_3_BR1_IDA_TOF3_P50_Wrong.wiff	FPR3	3644646	XP_713680	1	XP_713635.1	24	9	0.29	23.9		428
MFG1_3 (N-GFP)	MFG1	3643884	XP_714447.2	4738	6280	30890	MFG1_3_BR1_IDA_TOF3_P50	30890_MFG1_3_BR1_IDA_TOF3_P50_Wrong.wiff	POR1	3644667	XP_713692	1	XP_713647.1	15	11	0.17	43.6		282
MFG1_3 (N-GFP)	MFG1	3643884	XP_714447.2	4738	6280	30890	MFG1_3_BR1_IDA_TOF3_P50	30890_MFG1_3_BR1_IDA_TOF3_P50_Wrong.wiff	CaO19.8649	3644671	XP_713696	1	XP_713651.1	30	16	0.36	24.5		849
MFG1_3 (N-GFP)	MFG1	3643884	XP_714447.2	4738	6280	30890	MFG1_3_BR1_IDA_TOF3_P50	30890_MFG1_3_BR1_IDA_TOF3_P50_Wrong.wiff	HTA2	3644634	XP_713700	1	XP_713655.1	38	4	0.28	36.6		131
MFG1_3 (N-GFP)	MFG1	3643884	XP_714447.2	4738	6280	30890	MFG1_3_BR1_IDA_TOF3_P50	30890_MFG1_3_BR1_IDA_TOF3_P50_Wrong.wiff	HTB2	3644635	XP_713701	1	XP_713656.1; XP_712726.1; XP_712689.1	49	7	0.57	46.2		130
MFG1_3 (N-GFP)	MFG1	3643884	XP_714447.2	4738	6280	30890	MFG1_3_BR1_IDA_TOF3_P50	30890_MFG1_3_BR1_IDA_TOF3_P50_Wrong.wiff	CDC3	3644638	XP_713704	1	XP_713659.1	4	4	0.04	16.4		378
MFG1_3 (N-GFP)	MFG1	3643884	XP_714447.2	4738	6280	30890	MFG1_3_BR1_IDA_TOF3_P50	30890_MFG1_3_BR1_IDA_TOF3_P50_Wrong.wiff	HHF1	3644647	XP_713708	1	XP_713663.1; XP_711083.1; XP_711039.1	41	6	0.51	50.5		105
MFG1_3 (N-GFP)	MFG1	3643884	XP_714447.2	4738	6280	30890	MFG1_3_BR1_IDA_TOF3_P50	30890_MFG1_3_BR1_IDA_TOF3_P50_Wrong.wiff	HHT1	3644649	XP_713710	1	XP_713665.1; XP_711082.1; XP_711038.1	29	5	0.23	26.5		136
MFG1_3 (N-GFP)	MFG1	3643884	XP_714447.2	4738	6280	30890	MFG1_3_BR1_IDA_TOF3_P50	30890_MFG1_3_BR1_IDA_TOF3_P50_Wrong.wiff	ACS2	3644652	XP_713713	1	XP_713668.1	10	10	0.11	16.4		671
MFG1_3 (N-GFP)	MFG1	3643884	XP_714447.2	4738	6280	30890	MFG1_3_BR1_IDA_TOF3_P50	30890_MFG1_3_BR1_IDA_TOF3_P50_Wrong.wiff	SSA2	3644653	XP_713714	1	XP_713669.1	82	25	0.72	48.7		645
MFG1_3 (N-GFP)	MFG1	3643884	XP_714447.2	4738	6280	30890	MFG1_3_BR1_IDA_TOF3_P50	30890_MFG1_3_BR1_IDA_TOF3_P50_Wrong.wiff	CaO19.8374	3644733	XP_713599	1	XP_713564.1	3	3	0.04	10.6		396
MFG1_3 (N-GFP)	MFG1	3643884	XP_714447.2	4738	6280	30890	MFG1_3_BR1_IDA_TOF3_P50	30890_MFG1_3_BR1_IDA_TOF3_P50_Wrong.wiff	SEC21	3644738	XP_713604	1	XP_713569.1	19	15	0.22	20.1		936
MFG1_3 (N-GFP)	MFG1	3643884	XP_714447.2	4738	6280	30890	MFG1_3_BR1_IDA_TOF3_P50	30890_MFG1_3_BR1_IDA_TOF3_P50_Wrong.wiff	CBC2	3644742	XP_713608	1	XP_713573.1	10	7	0.12	38.4		224
MFG1_3 (N-GFP)	MFG1	3643884	XP_714447.2	4738	6280	30890	MFG1_3_BR1_IDA_TOF3_P50	30890_MFG1_3_BR1_IDA_TOF3_P50_Wrong.wiff	CaO19.8395	3644754	XP_713620	1	XP_713583.1	9	4	0.09	28.7		195
MFG1_3 (N-GFP)	MFG1	3643884	XP_714447.2	4738	6280	30890	MFG1_3_BR1_IDA_TOF3_P50	30890_MFG1_3_BR1_IDA_TOF3_P50_Wrong.wiff	SIS1	3644823	XP_713528	1	XP_713489.1	2	2	0.02	5.8		343
MFG1_3 (N-GFP)	MFG1	3643884	XP_714447.2	4738	6280	30890	MFG1_3_BR1_IDA_TOF3_P50	30890_MFG1_3_BR1_IDA_TOF3_P50_Wrong.wiff	PGI1	3644831	XP_713554	1	XP_713513.1	12	9	0.14	20.9		550
MFG1_3 (N-GFP)	MFG1	3643884	XP_714447.2	4738	6280	30890	MFG1_3_BR1_IDA_TOF3_P50	30890_MFG1_3_BR1_IDA_TOF3_P50_Wrong.wiff	MET15	3644955	XP_713373	1	XP_713326.1	5	4	0.05	18		440
MFG1_3 (N-GFP)	MFG1	3643884	XP_714447.2	4738	6280	30890	MFG1_3_BR1_IDA_TOF3_P50	30890_MFG1_3_BR1_IDA_TOF3_P50_Wrong.wiff	SUB2	3644966	XP_713375	1	XP_713328.1	6	6	0.07	24.1		290
MFG1_3 (N-GFP)	MFG1	3643884	XP_714447.2	4738	6280	30890	MFG1_3_BR1_IDA_TOF3_P50	30890_MFG1_3_BR1_IDA_TOF3_P50_Wrong.wiff	ATP2	3644972	XP_713381	1	XP_713334.1	25	12	0.27	38.7		512
MFG1_3 (N-GFP)	MFG1	3643884	XP_714447.2	4738	6280	30890	MFG1_3_BR1_IDA_TOF3_P50	30890_MFG1_3_BR1_IDA_TOF3_P50_Wrong.wiff	CaO19.13116	3644963	XP_713399	1	XP_713352.1	14	11	0.16	24.2		811
MFG1_3 (N-GFP)	MFG1	3643884	XP_714447.2	4738	6280	30890	MFG1_3_BR1_IDA_TOF3_P50	30890_MFG1_3_BR1_IDA_TOF3_P50_Wrong.wiff	CaO19.9922	3645072	XP_713270	1	XP_713219.1	2	2	0.02	7.7		247
MFG1_3 (N-GFP)	MFG1	3643884	XP_714447.2	4738	6280	30890	MFG1_3_BR1_IDA_TOF3_P50	30890_MFG1_3_BR1_IDA_TOF3_P50_Wrong.wiff	RCL1	3645157	XP_713189	1	XP_713143.1	2	2	0.02	7.5		371
MFG1_3 (N-GFP)	MFG1	3643884	XP_714447.2	4738	6280	30890	MFG1_3_BR1_IDA_TOF3_P50	30890_MFG1_3_BR1_IDA_TOF3_P50_Wrong.wiff	CaO19.9452	3645186	XP_713199	1	XP_713153.1	15	12	0.18	26.2		648
MFG1_3 (N-GFP)	MFG1	3643884	XP_714447.2	4738	6280	30890	MFG1_3_BR1_IDA_TOF3_P50	30890_MFG1_3_BR1_IDA_TOF3_P50_Wrong.wiff	CaO19.9458	3645164	XP_713205	1	XP_713159.1	21	9	0.16	19.9		562
MFG1_3 (N-GFP)	MFG1	3643884	XP_714447.2	4738	6280	30890	MFG1_3_BR1_IDA_TOF3_P50	30890_MFG1_3_BR1_IDA_TOF3_P50_Wrong.wiff	HSP60	3645238	XP_713100	1	XP_713077.1	8	7	0.1	17.5		566
MFG1_3 (N-GFP)	MFG1	3643884	XP_714447.2	4738	6280	30890	MFG1_3_BR1_IDA_TOF3_P50	30890_MFG1_3_BR1_IDA_TOF3_P50_Wrong.wiff	SVL3	3645295	XP_713042	1	XP_713008.1	6	5	0.06	8.5		976
MFG1_3 (N-GFP)	MFG1	3643884	XP_714447.2	4738	6280	30890	MFG1_3_BR1_IDA_TOF3_P50	30890_MFG1_3_BR1_IDA_TOF3_P50_Wrong.wiff	GAR1	3645298	XP_713063	1	XP_713031.1	31	4	0.37	29.6		196
MFG1_3 (N-GFP)	MFG1	3643884	XP_714447.2	4738	6280	30890	MFG1_3_BR1_IDA_TOF3_P50	30890_MFG1_3_BR1_IDA_TOF3_P50_Wrong.wiff	RPN6	3645352	XP_709940	1	XP_712979.1	4	4	0.05	9.4		435
MFG1_3 (N-GFP)	MFG1	3643884	XP_714447.2	4738	6280	30890	MFG1_3_BR1_IDA_TOF3_P50	30890_MFG1_3_BR1_IDA_TOF3_P50_Wrong.wiff	RPL17B	3645439	XP_712916	1	XP_712884.1	14	5	0.17	38.9		185
MFG1_3 (N-GFP)	MFG1	3643884	XP_714447.2	4738	6280	30890	MFG1_3_BR1_IDA_TOF3_P50	30890_MFG1_3_BR1_IDA_TOF3_P50_Wrong.wiff	CAALFM_C204570WA	3645441	XP_712918	1	XP_712886.1	11	8	0.13	18.3		426
MFG1_3 (N-GFP)	MFG1	3643884	XP_714447.2	4738	6280	30890	MFG1_3_BR1_IDA_TOF3_P50	30890_MFG1_3_BR1_IDA_TOF3_P50_Wrong.wiff	CAALFM_C204370WA	3645460	XP_712942	1	XP_712909.1	13	10	0.15	32.9		410
MFG1_3 (N-GFP)	MFG1	3643884	XP_714447.2	4738	6280	30890	MFG1_3_BR1_IDA_TOF3_P50	30890_MFG1_3_BR1_IDA_TOF3_P50_Wrong.wiff	RPS8	3645532	XP_712831	1	XP_712803.1	12	7	0.15	43.2		206
MFG1_3 (N-GFP)	MFG1	3643884	XP_714447.2	4738	6280	30890	MFG1_3_BR1_IDA_TOF3_P50	30890_MFG1_3_BR1_IDA_TOF3_P50_Wrong.wiff	CaO19.14166	3645536	XP_712835	1	XP_712806.1	10	7	0.12	9.5		983
MFG1_3 (N-GFP)	MFG1	3643884	XP_714447.2	4738	6280	30890	MFG1_3_BR1_IDA_TOF3_P50	30890_MFG1_3_BR1_IDA_TOF3_P50_Wrong.wiff	RFC1	3645550	XP_712849	1	XP_712820.1	8	7	0.1	12.9		688
MFG1_3 (N-GFP)	MFG1	3643884	XP_714447.2	4738	6280	30890	MFG1_3_BR1_IDA_TOF3_P50	30890_MFG1_3_BR1_IDA_TOF3_P50_Wrong.wiff	NMD5	3645590	XP_712793	1	XP_712642.1	7	5	0.09	5.9		1017
MFG1_3 (N-GFP)	MFG1	3643884	XP_714447.2	4738	6280	30890	MFG1_3_BR1_IDA_TOF3_P50	30890_MFG1_3_BR1_IDA_TOF3_P50_Wrong.wiff	RLP24	3645593	XP_712796	1	XP_712645.1	4	3	0.05	14.8		209
MFG1_3 (N-GFP)	MFG1	3643884	XP_714447.2	4738	6280	30890	MFG1_3_BR1_IDA_TOF3_P50	30890_MFG1_3_BR1_IDA_TOF3_P50_Wrong.wiff	CaO19.9898	3645699	XP_712672	1	XP_712652.1	3	3	0.04	9.3		281
MFG1_3 (N-GFP)	MFG1	3643884	XP_714447.2	4738	6280	30890	MFG1_3_BR1_IDA_TOF3_P50	30890_MFG1_3_BR1_IDA_TOF3_P50_Wrong.wiff	CAALFM_C209040WA	3645792	XP_712585	1	XP_712556.1	3	3	0.04	17.6		193
MFG1_3 (N-GFP)	MFG1	3643884	XP_714447.2	4738	6280	30890	MFG1_3_BR1_IDA_TOF3_P50	30890_MFG1_3_BR1_IDA_TOF3_P50_Wrong.wiff	CAALFM_C208930WA	3645795	XP_712597	1	XP_712570.1	2	2	0.02	9.4		277
MFG1_3 (N-GFP)	MFG1	3643884	XP_714447.2	4738	6280	30890	MFG1_3_BR1_IDA_TOF3_P50	30890_MFG1_3_BR1_IDA_TOF3_P50_Wrong.wiff	CAALFM_C208910CA	3645798	XP_712600	1	XP_712573.1	3	3	0.04	9.1		508
MFG1_3 (N-GFP)	MFG1	3643884	XP_714447.2	4738	6280	30890	MFG1_3_BR1_IDA_TOF3_P50	30890_MFG1_3_BR1_IDA_TOF3_P50_Wrong.wiff	SAR1	3645840	XP_712532	1	XP_712502.1	9	5	0.11	44.7		152
MFG1_3 (N-GFP)	MFG1	3643884	XP_714447.2	4738	6280	30890	MFG1_3_BR1_IDA_TOF3_P50	30890_MFG1_3_BR1_IDA_TOF3_P50_Wrong.wiff	LSG1	3645841	XP_712533	1	XP_712503.1	3	3	0.04	4.4		684
MFG1_3 (N-GFP)	MFG1	3643884	XP_714447.2	4738	6280	30890	MFG1_3_BR1_IDA_TOF3_P50	30890_MFG1_3_BR1_IDA_TOF3_P50_Wrong.wiff	RPL1	3645843	XP_712535	1	XP_712505.1	26	11	0.31	41.9		217
MFG1_3 (N-GFP)	MFG1	3643884	XP_714447.2	4738	6280	30890	MFG1_3_BR1_IDA_TOF3_P50	30890_MFG1_3_BR1_IDA_TOF3_P50_Wrong.wiff	SEC27	3645845	XP_712537	1	XP_712507.1	20	17	0.24	24.2		939
MFG1_3 (N-GFP)	MFG1	3643884	XP_714447.2	4738	6280	30890	MFG1_3_BR1_IDA_TOF3_P50	30890_MFG1_3_BR1_IDA_TOF3_P50_Wrong.wiff	CaO19.10979	3645852	XP_712544	1	XP_712514.1	2	2	0.02	21.5		190
MFG1_3 (N-GFP)	MFG1	3643884	XP_714447.2	4738	6280	30890	MFG1_3_BR1_IDA_TOF3_P50	30890_MFG1_3_BR1_IDA_TOF3_P50_Wrong.wiff	HRR25	3645853	XP_712545	1	XP_712515.1	4	4	0.05	11.8		433
MFG1_3 (N-GFP)	MFG1	3643884	XP_714447.2	4738	6280	30890	MFG1_3_BR1_IDA_TOF3_P50	30890_MFG1_3_BR1_IDA_TOF3_P50_Wrong.wiff	NIP7	3645855	XP_712547	1	XP_712517.1	7	4	0.08	19.1		262
MFG1_3 (N-GFP)	MFG1	3643884	XP_714447.2	4738	6280	30890	MFG1_3_BR1_IDA_TOF3_P50	30890_MFG1_3_BR1_IDA_TOF3_P50_Wrong.wiff	RSM23	3645857	XP_712549	1	XP_712519.1	2	2	0.02	6.8		483
MFG1_3 (N-GFP)	MFG1	3643884	XP_714447.2	4738	6280	30890	MFG1_3_BR1_IDA_TOF3_P50	30890_MFG1_3_BR1_IDA_TOF3_P50_Wrong.wiff	DBP7	3645903	XP_712474	1	XP_888745.1	4	4	0.04	6.2		727
MFG1_3 (N-GFP)	MFG1	3643884	XP_714447.2	4738	6280	30890	MFG1_3_BR1_IDA_TOF3_P50	30890_MFG1_3_BR1_IDA_TOF3_P50_Wrong.wiff	ASC1	3645907	XP_712478	1	XP_888749.1	5	5	0.06	37.9		211
MFG1_3 (N-GFP)	MFG1	3643884	XP_714447.2	4738	6280	30890	MFG1_3_BR1_IDA_TOF3_P50	30890_MFG1_3_BR1_IDA_TOF3_P50_Wrong.wiff	NOP58	3645922	XP_712460	1		262	24	1.63	58.6		515
MFG1_3 (N-GFP)	MFG1	3643884	XP_714447.2	4738	6280	30890	MFG1_3_BR1_IDA_TOF3_P50	30890_MFG1_3_BR1_IDA_TOF3_P50_Wrong.wiff	NOP5	3646084	XP_712316	1		258	24	1.58	58.5		516
MFG1_3 (N-GFP)	MFG1	3643884	XP_714447.2	4738	6280	30890	MFG1_3_BR1_IDA_TOF3_P50	30890_MFG1_3_BR1_IDA_TOF3_P50_Wrong.wiff	CAALFM_C104600CA	3646133	XP_712241	1	XP_712211.1	2	2	0.02	5.8		345
MFG1_3 (N-GFP)	MFG1	3643884	XP_714447.2	4738	6280	30890	MFG1_3_BR1_IDA_TOF3_P50	30890_MFG1_3_BR1_IDA_TOF3_P50_Wrong.wiff	VMA2	3646206	XP_712174	1	XP_711700.1	31	19	0.38	49.4		512
MFG1_3 (N-GFP)	MFG1	3643884	XP_714447.2	4738	6280	30890	MFG1_3_BR1_IDA_TOF3_P50	30890_MFG1_3_BR1_IDA_TOF3_P50_Wrong.wiff	HMO1	3646217	XP_712185	1	XP_711711.1	13	7	0.13	43.9		223
MFG1_3 (N-GFP)	MFG1	3643884	XP_714447.2	4738	6280	30890	MFG1_3_BR1_IDA_TOF3_P50	30890_MFG1_3_BR1_IDA_TOF3_P50_Wrong.wiff	CaO19.13969	3646220	XP_712188	1	XP_711714.1	5	5	0.06	9.5		759
MFG1_3 (N-GFP)	MFG1	3643884	XP_714447.2	4738	6280	30890	MFG1_3_BR1_IDA_TOF3_P50	30890_MFG1_3_BR1_IDA_TOF3_P50_Wrong.wiff	DBP8	3646191	XP_712192	1	XP_711718.1	13	3	0.04	11.4		440
MFG1_3 (N-GFP)	MFG1	3643884	XP_714447.2	4738	6280	30890	MFG1_3_BR1_IDA_TOF3_P50	30890_MFG1_3_BR1_IDA_TOF3_P50_Wrong.wiff	ENP2	3646234	XP_712139	1	XP_712114.1; XP_888960.1	4	3	0.05	4.8		750
MFG1_3 (N-GFP)	MFG1	3643884	XP_714447.2	4738	6280	30890	MFG1_3_BR1_IDA_TOF3_P50	30890_MFG1_3_BR1_IDA_TOF3_P50_Wrong.wiff	DED81	3646227	XP_712154	1	XP_712129.1; XP_888973.1	3	2	0.03	7.1		552
MFG1_3 (N-GFP)	MFG1	3643884	XP_714447.2	4738	6280	30890	MFG1_3_BR1_IDA_TOF3_P50	30890_MFG1_3_BR1_IDA_TOF3_P50_Wrong.wiff	CAALFM_C703480WA	3646230	XP_712157	1	XP_712132.1; XP_888955.1	7	6	0.09	5.8		1045
MFG1_3 (N-GFP)	MFG1	3643884	XP_714447.2	4738	6280	30890	MFG1_3_BR1_IDA_TOF3_P50	30890_MFG1_3_BR1_IDA_TOF3_P50_Wrong.wiff	CDC39	3646278	XP_712097	1	XP_712072.1	8	8	0.09	5.5		2016
MFG1_3 (N-GFP)	MFG1	3643884	XP_714447.2	4738	6280	30890	MFG1_3_BR1_IDA_TOF3_P50	30890_MFG1_3_BR1_IDA_TOF3_P50_Wrong.wiff	NOP8	3646290	XP_712104	1	XP_712079.1	16	10	0.18	14.8		690
MFG1_3 (N-GFP)	MFG1	3643884	XP_714447.2	4738	6280	30890	MFG1_3_BR1_IDA_TOF3_P50	30890_MFG1_3_BR1_IDA_TOF3_P50_Wrong.wiff	FLO8	3646292	XP_712106	1	XP_712082.1	25	13	0.29	17		817
MFG1_3 (N-GFP)	MFG1	3643884	XP_714447.2	4738	6280	30890	MFG1_3_BR1_IDA_TOF3_P50	30890_MFG1_3_BR1_IDA_TOF3_P50_Wrong.wiff	CAM1	3646337	XP_712054	1	XP_712033.1	15	10	0.17	29.4		419
MFG1_3 (N-GFP)	MFG1	3643884	XP_714447.2	4738	6280	30890	MFG1_3_BR1_IDA_TOF3_P50	30890_MFG1_3_BR1_IDA_TOF3_P50_Wrong.wiff	GCR3	3646476	XP_711904	1	XP_711875.1	30	21	0.36	30.6		886
MFG1_3 (N-GFP)	MFG1	3643884	XP_714447.2	4738	6280	30890	MFG1_3_BR1_IDA_TOF3_P50	30890_MFG1_3_BR1_IDA_TOF3_P50_Wrong.wiff	ENO1	3646484	XP_711912	1	XP_711883.1	55	16	0.67	55		440
MFG1_3 (N-GFP)	MFG1	3643884	XP_714447.2	4738	6280	30890	MFG1_3_BR1_IDA_TOF3_P50	30890_MFG1_3_BR1_IDA_TOF3_P50_Wrong.wiff	YPK2	3646471	XP_711916	1	XP_711887.1	4	4	0.05	7		712
MFG1_3 (N-GFP)	MFG1	3643884	XP_714447.2	4738	6280	30890	MFG1_3_BR1_IDA_TOF3_P50	30890_MFG1_3_BR1_IDA_TOF3_P50_Wrong.wiff	CaO19.8030	3646472	XP_711917	1	XP_711888.1	3	3	0.04	15.1		245
MFG1_3 (N-GFP)	MFG1	3643884	XP_714447.2	4738	6280	30890	MFG1_3_BR1_IDA_TOF3_P50	30890_MFG1_3_BR1_IDA_TOF3_P50_Wrong.wiff	TCP1	3646473	XP_711918	1	XP_711889.1	6	4	0.05	15		554
MFG1_3 (N-GFP)	MFG1	3643884	XP_714447.2	4738	6280	30890	MFG1_3_BR1_IDA_TOF3_P50	30890_MFG1_3_BR1_IDA_TOF3_P50_Wrong.wiff	GCD6	3646459	XP_711924	1	XP_711895.1	7	5	0.08	9.7		732
MFG1_3 (N-GFP)	MFG1	3643884	XP_714447.2	4738	6280	30890	MFG1_3_BR1_IDA_TOF3_P50	30890_MFG1_3_BR1_IDA_TOF3_P50_Wrong.wiff	CaO19.8316	3646600	XP_711788	1	XP_711770.1	4	4	0.04	10.5		447
MFG1_3 (N-GFP)	MFG1	3643884	XP_714447.2	4738	6280	30890	MFG1_3_BR1_IDA_TOF3_P50	30890_MFG1_3_BR1_IDA_TOF3_P50_Wrong.wiff	LSC2	3646604	XP_711801	1	XP_711783.1	4	3	0.05	27.5		120
MFG1_3 (N-GFP)	MFG1	3643884	XP_714447.2	4738	6280	30890	MFG1_3_BR1_IDA_TOF3_P50	30890_MFG1_3_BR1_IDA_TOF3_P50_Wrong.wiff	CaO19.10294	3646651	XP_711742	1	XP_711720.1	13	11	0.16	19.5		665
MFG1_3 (N-GFP)	MFG1	3643884	XP_714447.2	4738	6280	30890	MFG1_3_BR1_IDA_TOF3_P50	30890_MFG1_3_BR1_IDA_TOF3_P50_Wrong.wiff	RPG1	3646756	XP_711631	1		24	20	0.15	25.3		930
MFG1_3 (N-GFP)	MFG1	3643884	XP_714447.2	4738	6280	30890	MFG1_3_BR1_IDA_TOF3_P50	30890_MFG1_3_BR1_IDA_TOF3_P50_Wrong.wiff	MRPL151	3646771	XP_711650	1	XP_711581.1; XP_710785.1; XP_710772.1	3	3	0.04	17.3		220
MFG1_3 (N-GFP)	MFG1	3643884	XP_714447.2	4738	6280	30890	MFG1_3_BR1_IDA_TOF3_P50	30890_MFG1_3_BR1_IDA_TOF3_P50_Wrong.wiff	RPG1A	3646816	XP_711563	1		23	20	0.14	25.3		930
MFG1_3 (N-GFP)	MFG1	3643884	XP_714447.2	4738	6280	30890	MFG1_3_BR1_IDA_TOF3_P50	30890_MFG1_3_BR1_IDA_TOF3_P50_Wrong.wiff	CaO19.12932	3646902	XP_711493	1	XP_711469.1	15	14	0.17	22.1		778
MFG1_3 (N-GFP)	MFG1	3643884	XP_714447.2	4738	6280	30890	MFG1_3_BR1_IDA_TOF3_P50	30890_MFG1_3_BR1_IDA_TOF3_P50_Wrong.wiff	GSP1	3646894	XP_711509	1	XP_711485.1	3	2	0.04	9.8		214
MFG1_3 (N-GFP)	MFG1	3643884	XP_714447.2	4738	6280	30890	MFG1_3_BR1_IDA_TOF3_P50	30890_MFG1_3_BR1_IDA_TOF3_P50_Wrong.wiff	MAK16	3646900	XP_711515	1	XP_711491.1	4	4	0.05	17.1		315
MFG1_3 (N-GFP)	MFG1	3643884	XP_714447.2	4738	6280	30890	MFG1_3_BR1_IDA_TOF3_P50	30890_MFG1_3_BR1_IDA_TOF3_P50_Wrong.wiff	MAK11	3646935	XP_711456	1	XP_711439.1	4	4	0.04	13		491
MFG1_3 (N-GFP)	MFG1	3643884	XP_714447.2	4738	6280	30890	MFG1_3_BR1_IDA_TOF3_P50	30890_MFG1_3_BR1_IDA_TOF3_P50_Wrong.wiff	RPS25B	3646972	XP_711416	1		7	3	0.09	32.4		105
MFG1_3 (N-GFP)	MFG1	3643884	XP_714447.2	4738	6280	30890	MFG1_3_BR1_IDA_TOF3_P50	30890_MFG1_3_BR1_IDA_TOF3_P50_Wrong.wiff	MDJ1	3646980	XP_711424	1		3	2	0.03	7.6		488
MFG1_3 (N-GFP)	MFG1	3643884	XP_714447.2	4738	6280	30890	MFG1_3_BR1_IDA_TOF3_P50	30890_MFG1_3_BR1_IDA_TOF3_P50_Wrong.wiff	CEF3	3647006	XP_711404	1		78	30	0.47	37.4		1050
MFG1_3 (N-GFP)	MFG1	3643884	XP_714447.2	4738	6280	30890	MFG1_3_BR1_IDA_TOF3_P50	30890_MFG1_3_BR1_IDA_TOF3_P50_Wrong.wiff	SPB42	3647008	XP_711406	1	XP_711358.1; XP_711155.1; XP_711137.1	2	2	0.02	3.5		631
MFG1_3 (N-GFP)	MFG1	3643884	XP_714447.2	4738	6280	30890	MFG1_3_BR1_IDA_TOF3_P50	30890_MFG1_3_BR1_IDA_TOF3_P50_Wrong.wiff	PGK1	3647038	XP_711371	1	XP_711323.1	29	19	0.36	54.2		417
MFG1_3 (N-GFP)	MFG1	3643884	XP_714447.2	4738	6280	30890	MFG1_3_BR1_IDA_TOF3_P50	30890_MFG1_3_BR1_IDA_TOF3_P50_Wrong.wiff	CEF3	3647040	XP_711356	1		80	30	0.49	37.4		1050
MFG1_3 (N-GFP)	MFG1	3643884	XP_714447.2	4738	6280	30890	MFG1_3_BR1_IDA_TOF3_P50	30890_MFG1_3_BR1_IDA_TOF3_P50_Wrong.wiff	SSF1	3647085	XP_711291	1		4	3	0.04	10.1		377
MFG1_3 (N-GFP)	MFG1	3643884	XP_714447.2	4738	6280	30890	MFG1_3_BR1_IDA_TOF3_P50	30890_MFG1_3_BR1_IDA_TOF3_P50_Wrong.wiff	CAALFM_CR09520CA	3647103	XP_711309	1		3	3	0.04	3.6		924
MFG1_3 (N-GFP)	MFG1	3643884	XP_714447.2	4738	6280	30890	MFG1_3_BR1_IDA_TOF3_P50	30890_MFG1_3_BR1_IDA_TOF3_P50_Wrong.wiff	MSS11	3647284	XP_711111	1	XP_711094.1	9	4	0.09	10.5		640
MFG1_3 (N-GFP)	MFG1	3643884	XP_714447.2	4738	6280	30890	MFG1_3_BR1_IDA_TOF3_P50	30890_MFG1_3_BR1_IDA_TOF3_P50_Wrong.wiff	RPS3	3647287	XP_711114	1	XP_711097.1	28	12	0.34	53		251
MFG1_3 (N-GFP)	MFG1	3643884	XP_714447.2	4738	6280	30890	MFG1_3_BR1_IDA_TOF3_P50	30890_MFG1_3_BR1_IDA_TOF3_P50_Wrong.wiff	CaO19.11188	3647328	XP_711056	1	XP_711043.1	13	12	0.12	22.8		606
MFG1_3 (N-GFP)	MFG1	3643884	XP_714447.2	4738	6280	30890	MFG1_3_BR1_IDA_TOF3_P50	30890_MFG1_3_BR1_IDA_TOF3_P50_Wrong.wiff	RFC3	3647429	XP_710962	1	XP_710951.1	2	2	0.02	9.4		361
MFG1_3 (N-GFP)	MFG1	3643884	XP_714447.2	4738	6280	30890	MFG1_3_BR1_IDA_TOF3_P50	30890_MFG1_3_BR1_IDA_TOF3_P50_Wrong.wiff	SEC61	3647462	XP_710932	1		3	3	0.04	6.1		479
MFG1_3 (N-GFP)	MFG1	3643884	XP_714447.2	4738	6280	30890	MFG1_3_BR1_IDA_TOF3_P50	30890_MFG1_3_BR1_IDA_TOF3_P50_Wrong.wiff	SRB1	3647454	XP_710946	1		44	15	0.52	45		362
MFG1_3 (N-GFP)	MFG1	3643884	XP_714447.2	4738	6280	30890	MFG1_3_BR1_IDA_TOF3_P50	30890_MFG1_3_BR1_IDA_TOF3_P50_Wrong.wiff	CAALFM_C104970WA	3647528	XP_710862	1	XP_710850.1	19	16	0.21	16.6		1363
MFG1_3 (N-GFP)	MFG1	3643884	XP_714447.2	4738	6280	30890	MFG1_3_BR1_IDA_TOF3_P50	30890_MFG1_3_BR1_IDA_TOF3_P50_Wrong.wiff	RRP6	3647535	XP_710869	1	XP_710857.1	2	2	0.02	2.8		786
MFG1_3 (N-GFP)	MFG1	3643884	XP_714447.2	4738	6280	30890	MFG1_3_BR1_IDA_TOF3_P50	30890_MFG1_3_BR1_IDA_TOF3_P50_Wrong.wiff	CHC1	3647552	XP_710836	1	XP_710822.1	16	12	0.16	11.2		1671
MFG1_3 (N-GFP)	MFG1	3643884	XP_714447.2	4738	6280	30890	MFG1_3_BR1_IDA_TOF3_P50	30890_MFG1_3_BR1_IDA_TOF3_P50_Wrong.wiff	RPL23A	3647558	XP_710842	1	XP_710828.1	15	4	0.18	35.7		115
MFG1_3 (N-GFP)	MFG1	3643884	XP_714447.2	4738	6280	30890	MFG1_3_BR1_IDA_TOF3_P50	30890_MFG1_3_BR1_IDA_TOF3_P50_Wrong.wiff	CaO19.13272	3647585	XP_710816	1	XP_710805.1	10	7	0.11	13.2		714
MFG1_3 (N-GFP)	MFG1	3643884	XP_714447.2	4738	6280	30890	MFG1_3_BR1_IDA_TOF3_P50	30890_MFG1_3_BR1_IDA_TOF3_P50_Wrong.wiff	TOM71	3647631	XP_710768	1	XP_710749.1; XP_888879.1	5	5	0.06	10.3		629
MFG1_3 (N-GFP)	MFG1	3643884	XP_714447.2	4738	6280	30890	MFG1_3_BR1_IDA_TOF3_P50	30890_MFG1_3_BR1_IDA_TOF3_P50_Wrong.wiff	CBF5	3647637	XP_710755	1	XP_710717.1	172	21	2.07	51.1		479
MFG1_3 (N-GFP)	MFG1	3643884	XP_714447.2	4738	6280	30890	MFG1_3_BR1_IDA_TOF3_P50	30890_MFG1_3_BR1_IDA_TOF3_P50_Wrong.wiff	CaO19.170	3647691	XP_710707	1	XP_710693.1	13	3	0.15	38.9		112
MFG1_3 (N-GFP)	MFG1	3643884	XP_714447.2	4738	6280	30890	MFG1_3_BR1_IDA_TOF3_P50	30890_MFG1_3_BR1_IDA_TOF3_P50_Wrong.wiff	DBP2	3647692	XP_710708	1	XP_710694.1	98	20	1	42.2		443
MFG1_3 (N-GFP)	MFG1	3643884	XP_714447.2	4738	6280	30890	MFG1_3_BR1_IDA_TOF3_P50	30890_MFG1_3_BR1_IDA_TOF3_P50_Wrong.wiff	RPL3	3647719	XP_710682	1	XP_710673.1	40	16	0.46	46.3		389
MFG1_3 (N-GFP)	MFG1	3643884	XP_714447.2	4738	6280	30890	MFG1_3_BR1_IDA_TOF3_P50	30890_MFG1_3_BR1_IDA_TOF3_P50_Wrong.wiff	PET56	3647763	XP_710624	1	XP_710610.1	2	2	0.02	7.1		396
MFG1_3 (N-GFP)	MFG1	3643884	XP_714447.2	4738	6280	30890	MFG1_3_BR1_IDA_TOF3_P50	30890_MFG1_3_BR1_IDA_TOF3_P50_Wrong.wiff	CAALFM_C500150CA	3647872	XP_710511	1		12	7	0.15	22.5		543
MFG1_3 (N-GFP)	MFG1	3643884	XP_714447.2	4738	6280	30890	MFG1_3_BR1_IDA_TOF3_P50	30890_MFG1_3_BR1_IDA_TOF3_P50_Wrong.wiff	THS1	3647882	XP_710514	1		3	3	0.04	4.8		706
MFG1_3 (N-GFP)	MFG1	3643884	XP_714447.2	4738	6280	30890	MFG1_3_BR1_IDA_TOF3_P50	30890_MFG1_3_BR1_IDA_TOF3_P50_Wrong.wiff	CAALFM_C500080CA	3647886	XP_710518	1		4	4	0.05	13.8		311
MFG1_3 (N-GFP)	MFG1	3643884	XP_714447.2	4738	6280	30890	MFG1_3_BR1_IDA_TOF3_P50	30890_MFG1_3_BR1_IDA_TOF3_P50_Wrong.wiff	CAALFM_C500030WA	3647879	XP_710527	1		4	4	0.05	22.3		269
MFG1_3 (N-GFP)	MFG1	3643884	XP_714447.2	4738	6280	30890	MFG1_3_BR1_IDA_TOF3_P50	30890_MFG1_3_BR1_IDA_TOF3_P50_Wrong.wiff	VID27	3647894	XP_710495	1		4	4	0.04	7.2		745
MFG1_3 (N-GFP)	MFG1	3643884	XP_714447.2	4738	6280	30890	MFG1_3_BR1_IDA_TOF3_P50	30890_MFG1_3_BR1_IDA_TOF3_P50_Wrong.wiff	HET1	3647897	XP_710498	1		2	2	0.02	11.7		197
MFG1_3 (N-GFP)	MFG1	3643884	XP_714447.2	4738	6280	30890	MFG1_3_BR1_IDA_TOF3_P50	30890_MFG1_3_BR1_IDA_TOF3_P50_Wrong.wiff	UTP20	3647953	XP_710448	1	XP_710441.1	6	6	0.07	6.8		1197
MFG1_3 (N-GFP)	MFG1	3643884	XP_714447.2	4738	6280	30890	MFG1_3_BR1_IDA_TOF3_P50	30890_MFG1_3_BR1_IDA_TOF3_P50_Wrong.wiff	STT4	3647963	XP_710433	1		6	5	0.04	3.7		1927
MFG1_3 (N-GFP)	MFG1	3643884	XP_714447.2	4738	6280	30890	MFG1_3_BR1_IDA_TOF3_P50	30890_MFG1_3_BR1_IDA_TOF3_P50_Wrong.wiff	CAALFM_CR07080WA	3647964	XP_710434	1	XP_710430.1	4	2	0.04	22		245
MFG1_3 (N-GFP)	MFG1	3643884	XP_714447.2	4738	6280	30890	MFG1_3_BR1_IDA_TOF3_P50	30890_MFG1_3_BR1_IDA_TOF3_P50_Wrong.wiff	NOP4	3647980	XP_710417	1	XP_710406.1	6	6	0.06	7.8		741
MFG1_3 (N-GFP)	MFG1	3643884	XP_714447.2	4738	6280	30890	MFG1_3_BR1_IDA_TOF3_P50	30890_MFG1_3_BR1_IDA_TOF3_P50_Wrong.wiff	SLB2	3648018	XP_710381	1	XP_710374.1	10	8	0.11	30		317
MFG1_3 (N-GFP)	MFG1	3643884	XP_714447.2	4738	6280	30890	MFG1_3_BR1_IDA_TOF3_P50	30890_MFG1_3_BR1_IDA_TOF3_P50_Wrong.wiff	VMA6	3648045	XP_710349	1	XP_710332.1	2	2	0.02	8.6		348
MFG1_3 (N-GFP)	MFG1	3643884	XP_714447.2	4738	6280	30890	MFG1_3_BR1_IDA_TOF3_P50	30890_MFG1_3_BR1_IDA_TOF3_P50_Wrong.wiff	GUT1	3648074	XP_710325	1	XP_710317.1	2	2	0.02	4.6		631
MFG1_3 (N-GFP)	MFG1	3643884	XP_714447.2	4738	6280	30890	MFG1_3_BR1_IDA_TOF3_P50	30890_MFG1_3_BR1_IDA_TOF3_P50_Wrong.wiff	TRP5	3648087	XP_710312	1		16	15	0.2	30.5		702
MFG1_3 (N-GFP)	MFG1	3643884	XP_714447.2	4738	6280	30890	MFG1_3_BR1_IDA_TOF3_P50	30890_MFG1_3_BR1_IDA_TOF3_P50_Wrong.wiff	CAALFM_C204870CA	3648111	XP_710282	1		3	3	0.04	2.9		1608
MFG1_3 (N-GFP)	MFG1	3643884	XP_714447.2	4738	6280	30890	MFG1_3_BR1_IDA_TOF3_P50	30890_MFG1_3_BR1_IDA_TOF3_P50_Wrong.wiff	UGP1	3648144	XP_710258	1	XP_710250.1	2	2	0.02	5.5		472
MFG1_3 (N-GFP)	MFG1	3643884	XP_714447.2	4738	6280	30890	MFG1_3_BR1_IDA_TOF3_P50	30890_MFG1_3_BR1_IDA_TOF3_P50_Wrong.wiff	SPB1	3648174	XP_710229	1	XP_710224.1	9	6	0.11	9.7		853
MFG1_3 (N-GFP)	MFG1	3643884	XP_714447.2	4738	6280	30890	MFG1_3_BR1_IDA_TOF3_P50	30890_MFG1_3_BR1_IDA_TOF3_P50_Wrong.wiff	ERG10	3648275	XP_710124	1		3	3	0.04	12.7		402
MFG1_3 (N-GFP)	MFG1	3643884	XP_714447.2	4738	6280	30890	MFG1_3_BR1_IDA_TOF3_P50	30890_MFG1_3_BR1_IDA_TOF3_P50_Wrong.wiff	VAS1	3648338	XP_710062	1	XP_710060.1	5	5	0.06	7.3		1119
MFG1_3 (N-GFP)	MFG1	3643884	XP_714447.2	4738	6280	30890	MFG1_3_BR1_IDA_TOF3_P50	30890_MFG1_3_BR1_IDA_TOF3_P50_Wrong.wiff	CaO19.37	3648425	XP_709976	1		9	6	0.1	13.6		478
MFG1_3 (N-GFP)	MFG1	3643884	XP_714447.2	4738	6280	30890	MFG1_3_BR1_IDA_TOF3_P50	30890_MFG1_3_BR1_IDA_TOF3_P50_Wrong.wiff	CaJ7_s010	3703929	XP_888868	1		2	2	0.02	21.1		95
MFG1_3 (N-GFP)	MFG1	3643884	XP_714447.2	4738	6280	30890	MFG1_3_BR1_IDA_TOF3_P50	30890_MFG1_3_BR1_IDA_TOF3_P50_Wrong.wiff	CaJ7_0366	3704165	XP_888925	1		5	3	0.06	32.4		105
MFG1_3 (N-GFP)	MFG1	3643884	XP_714447.2	4738	6280	30890	MFG1_3_BR1_IDA_TOF3_P50	30890_MFG1_3_BR1_IDA_TOF3_P50_Wrong.wiff	HBA	512439	P01966	1		6	5	0.07	46.5		142
MFG1_3 (N-GFP)	MFG1	3643884	XP_714447.2	4738	6280	30890	MFG1_3_BR1_IDA_TOF3_P50	30890_MFG1_3_BR1_IDA_TOF3_P50_Wrong.wiff	KRT10	3858	P13645	1	K1C10_HUMAN	72	25	0.69	43.5		593
MFG1_3 (N-GFP)	MFG1	3643884	XP_714447.2	4738	6280	30890	MFG1_3_BR1_IDA_TOF3_P50	30890_MFG1_3_BR1_IDA_TOF3_P50_Wrong.wiff	KRT9	3857	P35527	1	K1C9_HUMAN	23	16	0.25	34.3		623
MFG1_3 (N-GFP)	MFG1	3643884	XP_714447.2	4738	6280	30890	MFG1_3_BR1_IDA_TOF3_P50	30890_MFG1_3_BR1_IDA_TOF3_P50_Wrong.wiff	KRT14	3861	P02533	1		12	5	0.05	13.3	0.2549	472
MFG1_3 (N-GFP)	MFG1	3643884	XP_714447.2	4738	6280	30890	MFG1_3_BR1_IDA_TOF3_P50	30890_MFG1_3_BR1_IDA_TOF3_P50_Wrong.wiff	Krt10	16661	P02535-1	0.9999		22	9	0.12	14.9		570
MFG1_3 (N-GFP)	MFG1	3643884	XP_714447.2	4738	6280	30890	MFG1_3_BR1_IDA_TOF3_P50	30890_MFG1_3_BR1_IDA_TOF3_P50_Wrong.wiff	Krt18	16668	P05784	0.9986	P08727; P19001	9	3	0.04	5.8		423
MFG1_3 (N-GFP)	MFG1	3643884	XP_714447.2	4738	6280	30890	MFG1_3_BR1_IDA_TOF3_P50	30890_MFG1_3_BR1_IDA_TOF3_P50_Wrong.wiff	KRT2	3849	P35908	1	K22E_HUMAN	84	30	0.86	57.8	0.3922	645
MFG1_3 (N-GFP)	MFG1	3643884	XP_714447.2	4738	6280	30890	MFG1_3_BR1_IDA_TOF3_P50	30890_MFG1_3_BR1_IDA_TOF3_P50_Wrong.wiff	KRT1	3848	P04264	1	K2C1_HUMAN	89	22	0.85	30.5		643
MFG1_3 (N-GFP)	MFG1	3643884	XP_714447.2	4738	6280	30890	MFG1_3_BR1_IDA_TOF3_P50	30890_MFG1_3_BR1_IDA_TOF3_P50_Wrong.wiff	KRT5	3852	P13647	1		26	12	0.17	20.5	0.1111	590
MFG1_3 (N-GFP)	MFG1	3643884	XP_714447.2	4738	6280	30890	MFG1_3_BR1_IDA_TOF3_P50	30890_MFG1_3_BR1_IDA_TOF3_P50_Wrong.wiff	Krt77	406220	Q6IFZ6	0.9999		11	5	0.05	7.2		572
MFG1_3 (N-GFP)	MFG1	3643884	XP_714447.2	4738	6280	30890	MFG1_3_BR1_IDA_TOF3_P50	30890_MFG1_3_BR1_IDA_TOF3_P50_Wrong.wiff	LOC788610	788610	Q3SX09	1		6	5	0.07	31.8		201
MFG1_3 (N-GFP)	MFG1	3643884	XP_714447.2	4738	6280	30890	MFG1_3_BR1_IDA_TOF3_P50	30890_MFG1_3_BR1_IDA_TOF3_P50_Wrong.wiff	CLA4	3634878	XP_723573	1		5	5	0.06	6		976
MFG1_3 (N-GFP)	MFG1	3643884	XP_714447.2	4738	6280	30890	MFG1_3_BR1_IDA_TOF3_P50	30890_MFG1_3_BR1_IDA_TOF3_P50_Wrong.wiff	ZCF31	3635191	XP_723136	1	XP_722989.1	42	27	0.49	32.2		1130
MFG1_3 (N-GFP)	MFG1	3643884	XP_714447.2	4738	6280	30890	MFG1_3_BR1_IDA_TOF3_P50	30890_MFG1_3_BR1_IDA_TOF3_P50_Wrong.wiff	ARF2	3635271	XP_723175	1	XP_723028.1	5	4	0.06	27.6		181
MFG1_3 (N-GFP)	MFG1	3643884	XP_714447.2	4738	6280	30890	MFG1_3_BR1_IDA_TOF3_P50	30890_MFG1_3_BR1_IDA_TOF3_P50_Wrong.wiff	RPL20B	3635615	XP_722704	1		25	9	0.29	50.6		172
MFG1_3 (N-GFP)	MFG1	3643884	XP_714447.2	4738	6280	30890	MFG1_3_BR1_IDA_TOF3_P50	30890_MFG1_3_BR1_IDA_TOF3_P50_Wrong.wiff	ACT1	3636030	XP_722325	1	XP_722211.1	15	9	0.17	34.7		360
MFG1_3 (N-GFP)	MFG1	3643884	XP_714447.2	4738	6280	30890	MFG1_3_BR1_IDA_TOF3_P50	30890_MFG1_3_BR1_IDA_TOF3_P50_Wrong.wiff	MYO2	3636089	XP_722333	1	XP_722219.1	29	24	0.35	19		1561
MFG1_3 (N-GFP)	MFG1	3643884	XP_714447.2	4738	6280	30890	MFG1_3_BR1_IDA_TOF3_P50	30890_MFG1_3_BR1_IDA_TOF3_P50_Wrong.wiff	ADH1	3636387	XP_722066	1		21	14	0.26	40		435
MFG1_3 (N-GFP)	MFG1	3643884	XP_714447.2	4738	6280	30890	MFG1_3_BR1_IDA_TOF3_P50	30890_MFG1_3_BR1_IDA_TOF3_P50_Wrong.wiff	MNT1	3636585	XP_721742	1	XP_721623.1	4	4	0.05	10.4		431
MFG1_3 (N-GFP)	MFG1	3643884	XP_714447.2	4738	6280	30890	MFG1_3_BR1_IDA_TOF3_P50	30890_MFG1_3_BR1_IDA_TOF3_P50_Wrong.wiff	TFP1	3636703	XP_721638	1		5	5	0.06	12.5		577
MFG1_3 (N-GFP)	MFG1	3643884	XP_714447.2	4738	6280	30890	MFG1_3_BR1_IDA_TOF3_P50	30890_MFG1_3_BR1_IDA_TOF3_P50_Wrong.wiff	GSC1	3636794	XP_721429	1	XP_721157.1	32	23	0.39	15.1		1897
MFG1_3 (N-GFP)	MFG1	3643884	XP_714447.2	4738	6280	30890	MFG1_3_BR1_IDA_TOF3_P50	30890_MFG1_3_BR1_IDA_TOF3_P50_Wrong.wiff	CYP1	3636978	XP_721313	1	XP_720801.1; XP_888857.1	7	4	0.09	35.2		162
MFG1_3 (N-GFP)	MFG1	3643884	XP_714447.2	4738	6280	30890	MFG1_3_BR1_IDA_TOF3_P50	30890_MFG1_3_BR1_IDA_TOF3_P50_Wrong.wiff	CHA2	3638689	XP_719575	1		3	3	0.04	11.3		353
MFG1_3 (N-GFP)	MFG1	3643884	XP_714447.2	4738	6280	30890	MFG1_3_BR1_IDA_TOF3_P50	30890_MFG1_3_BR1_IDA_TOF3_P50_Wrong.wiff	HXT63	3638770	XP_719596	1	XP_719469.1	8	5	0.1	10.7		550
MFG1_3 (N-GFP)	MFG1	3643884	XP_714447.2	4738	6280	30890	MFG1_3_BR1_IDA_TOF3_P50	30890_MFG1_3_BR1_IDA_TOF3_P50_Wrong.wiff	RFC5	3638785	XP_719603	1		9	7	0.11	26.5		362
MFG1_3 (N-GFP)	MFG1	3643884	XP_714447.2	4738	6280	30890	MFG1_3_BR1_IDA_TOF3_P50	30890_MFG1_3_BR1_IDA_TOF3_P50_Wrong.wiff	AHA1	3638933	XP_719364	1		8	5	0.1	15.3		346
MFG1_3 (N-GFP)	MFG1	3643884	XP_714447.2	4738	6280	30890	MFG1_3_BR1_IDA_TOF3_P50	30890_MFG1_3_BR1_IDA_TOF3_P50_Wrong.wiff	DRS1	3639045	XP_719395	1		16	14	0.18	27.2		613
MFG1_3 (N-GFP)	MFG1	3643884	XP_714447.2	4738	6280	30890	MFG1_3_BR1_IDA_TOF3_P50	30890_MFG1_3_BR1_IDA_TOF3_P50_Wrong.wiff	RNH12	3639090	XP_719243	1		17	11	0.21	47		232
MFG1_3 (N-GFP)	MFG1	3643884	XP_714447.2	4738	6280	30890	MFG1_3_BR1_IDA_TOF3_P50	30890_MFG1_3_BR1_IDA_TOF3_P50_Wrong.wiff	CAALFM_C106400CA	3639557	XP_718858	1		3	3	0.03	4.5		710
MFG1_3 (N-GFP)	MFG1	3643884	XP_714447.2	4738	6280	30890	MFG1_3_BR1_IDA_TOF3_P50	30890_MFG1_3_BR1_IDA_TOF3_P50_Wrong.wiff	RPS23	3639647	XP_718756	1		5	3	0.06	20		145
MFG1_3 (N-GFP)	MFG1	3643884	XP_714447.2	4738	6280	30890	MFG1_3_BR1_IDA_TOF3_P50	30890_MFG1_3_BR1_IDA_TOF3_P50_Wrong.wiff	FUN12	3640713	XP_717619	1	XP_717545.1	36	23	0.39	28.1		1017
MFG1_3 (N-GFP)	MFG1	3643884	XP_714447.2	4738	6280	30890	MFG1_3_BR1_IDA_TOF3_P50	30890_MFG1_3_BR1_IDA_TOF3_P50_Wrong.wiff	TEF3	3640757	XP_717655	1	XP_717581.1; XP_711899.1; XP_711870.1	123	15	1.47	39.7		458
MFG1_3 (N-GFP)	MFG1	3643884	XP_714447.2	4738	6280	30890	MFG1_3_BR1_IDA_TOF3_P50	30890_MFG1_3_BR1_IDA_TOF3_P50_Wrong.wiff	YDJ1	3640883	XP_717458	1		18	12	0.2	37.9		393
MFG1_3 (N-GFP)	MFG1	3643884	XP_714447.2	4738	6280	30890	MFG1_3_BR1_IDA_TOF3_P50	30890_MFG1_3_BR1_IDA_TOF3_P50_Wrong.wiff	CAALFM_C404870CA	3641160	XP_717197	1		3	3	0.04	5.1		785
MFG1_3 (N-GFP)	MFG1	3643884	XP_714447.2	4738	6280	30890	MFG1_3_BR1_IDA_TOF3_P50	30890_MFG1_3_BR1_IDA_TOF3_P50_Wrong.wiff	RPS4A	3641247	XP_717144	1	XP_717065.1	49	12	0.58	49.6		262
MFG1_3 (N-GFP)	MFG1	3643884	XP_714447.2	4738	6280	30890	MFG1_3_BR1_IDA_TOF3_P50	30890_MFG1_3_BR1_IDA_TOF3_P50_Wrong.wiff	THR1	3641572	XP_716762	1		4	4	0.05	14.8		357
MFG1_3 (N-GFP)	MFG1	3643884	XP_714447.2	4738	6280	30890	MFG1_3_BR1_IDA_TOF3_P50	30890_MFG1_3_BR1_IDA_TOF3_P50_Wrong.wiff	CaO19.8815	3641863	XP_716483	1		5	4	0.06	11.2		534
MFG1_3 (N-GFP)	MFG1	3643884	XP_714447.2	4738	6280	30890	MFG1_3_BR1_IDA_TOF3_P50	30890_MFG1_3_BR1_IDA_TOF3_P50_Wrong.wiff	HSP104	3642228	XP_716146	1		7	7	0.07	12		899
MFG1_3 (N-GFP)	MFG1	3643884	XP_714447.2	4738	6280	30890	MFG1_3_BR1_IDA_TOF3_P50	30890_MFG1_3_BR1_IDA_TOF3_P50_Wrong.wiff	NSA2	3642259	XP_716088	1		11	8	0.14	33.7		261
MFG1_3 (N-GFP)	MFG1	3643884	XP_714447.2	4738	6280	30890	MFG1_3_BR1_IDA_TOF3_P50	30890_MFG1_3_BR1_IDA_TOF3_P50_Wrong.wiff	UBI3	3642848	XP_715467	1	XP_715397.1	12	6	0.14	31.1		193
MFG1_3 (N-GFP)	MFG1	3643884	XP_714447.2	4738	6280	30890	MFG1_3_BR1_IDA_TOF3_P50	30890_MFG1_3_BR1_IDA_TOF3_P50_Wrong.wiff	CAALFM_C407130WA	3642938	XP_715401	1		15	11	0.14	9.3		1434
MFG1_3 (N-GFP)	MFG1	3643884	XP_714447.2	4738	6280	30890	MFG1_3_BR1_IDA_TOF3_P50	30890_MFG1_3_BR1_IDA_TOF3_P50_Wrong.wiff	NCB2	3643028	XP_715366	1	XP_715301.1	2	2	0.02	14.1		149
MFG1_3 (N-GFP)	MFG1	3643884	XP_714447.2	4738	6280	30890	MFG1_3_BR1_IDA_TOF3_P50	30890_MFG1_3_BR1_IDA_TOF3_P50_Wrong.wiff	SGD1	3643191	XP_715139	1		2	2	0.02	3.9		1011
MFG1_3 (N-GFP)	MFG1	3643884	XP_714447.2	4738	6280	30890	MFG1_3_BR1_IDA_TOF3_P50	30890_MFG1_3_BR1_IDA_TOF3_P50_Wrong.wiff	CAALFM_C205270WA	3643470	XP_714915	1		4	3	0.05	3.8		948
MFG1_3 (N-GFP)	MFG1	3643884	XP_714447.2	4738	6280	30890	MFG1_3_BR1_IDA_TOF3_P50	30890_MFG1_3_BR1_IDA_TOF3_P50_Wrong.wiff	CCT5	3643478	XP_714877	1	XP_714815.1	6	6	0.06	12.8		548
MFG1_3 (N-GFP)	MFG1	3643884	XP_714447.2	4738	6280	30890	MFG1_3_BR1_IDA_TOF3_P50	30890_MFG1_3_BR1_IDA_TOF3_P50_Wrong.wiff	SGN11	3643699	XP_714655	1		12	6	0.15	46		163
MFG1_3 (N-GFP)	MFG1	3643884	XP_714447.2	4738	6280	30890	MFG1_3_BR1_IDA_TOF3_P50	30890_MFG1_3_BR1_IDA_TOF3_P50_Wrong.wiff	CAALFM_C500790CA	3644125	XP_714209	1		3	3	0.04	6.7		698
MFG1_3 (N-GFP)	MFG1	3643884	XP_714447.2	4738	6280	30890	MFG1_3_BR1_IDA_TOF3_P50	30890_MFG1_3_BR1_IDA_TOF3_P50_Wrong.wiff	ILV5	3644290	XP_714020	1		2	2	0.02	7		400
MFG1_3 (N-GFP)	MFG1	3643884	XP_714447.2	4738	6280	30890	MFG1_3_BR1_IDA_TOF3_P50	30890_MFG1_3_BR1_IDA_TOF3_P50_Wrong.wiff	GAD1	3645291	XP_713052	1		12	9	0.14	20.1		568
MFG1_3 (N-GFP)	MFG1	3643884	XP_714447.2	4738	6280	30890	MFG1_3_BR1_IDA_TOF3_P50	30890_MFG1_3_BR1_IDA_TOF3_P50_Wrong.wiff	LYS22	3645466	XP_712932	1	XP_712900.1	4	4	0.05	11.3		417
MFG1_3 (N-GFP)	MFG1	3643884	XP_714447.2	4738	6280	30890	MFG1_3_BR1_IDA_TOF3_P50	30890_MFG1_3_BR1_IDA_TOF3_P50_Wrong.wiff	URA2	3645711	XP_712670	1	XP_712650.1	41	32	0.47	19.6		2216
MFG1_3 (N-GFP)	MFG1	3643884	XP_714447.2	4738	6280	30890	MFG1_3_BR1_IDA_TOF3_P50	30890_MFG1_3_BR1_IDA_TOF3_P50_Wrong.wiff	GAG1	3645713	XP_712681	1	XP_712685.1; XP_712661.1; XP_712665.1; XP_710114.1	8	5	0.08	21.7		324
MFG1_3 (N-GFP)	MFG1	3643884	XP_714447.2	4738	6280	30890	MFG1_3_BR1_IDA_TOF3_P50	30890_MFG1_3_BR1_IDA_TOF3_P50_Wrong.wiff	ATP1	3646134	XP_712242	1		16	10	0.2	26.6		447
MFG1_3 (N-GFP)	MFG1	3643884	XP_714447.2	4738	6280	30890	MFG1_3_BR1_IDA_TOF3_P50	30890_MFG1_3_BR1_IDA_TOF3_P50_Wrong.wiff	CAALFM_C604290WA	3646280	XP_712099	1		5	4	0.06	9.3		622
MFG1_3 (N-GFP)	MFG1	3643884	XP_714447.2	4738	6280	30890	MFG1_3_BR1_IDA_TOF3_P50	30890_MFG1_3_BR1_IDA_TOF3_P50_Wrong.wiff	MRPL22	3646777	XP_711609	1		5	5	0.05	21		291
MFG1_3 (N-GFP)	MFG1	3643884	XP_714447.2	4738	6280	30890	MFG1_3_BR1_IDA_TOF3_P50	30890_MFG1_3_BR1_IDA_TOF3_P50_Wrong.wiff	CAALFM_C112760WA	3646817	XP_711564	1		5	5	0.05	15.3		321
MFG1_3 (N-GFP)	MFG1	3643884	XP_714447.2	4738	6280	30890	MFG1_3_BR1_IDA_TOF3_P50	30890_MFG1_3_BR1_IDA_TOF3_P50_Wrong.wiff	MRPS5	3647170	XP_711230	1		3	3	0.04	8.9		336
MFG1_3 (N-GFP)	MFG1	3643884	XP_714447.2	4738	6280	30890	MFG1_3_BR1_IDA_TOF3_P50	30890_MFG1_3_BR1_IDA_TOF3_P50_Wrong.wiff	GLC7	3647257	XP_711142	1	XP_711124.1	5	3	0.06	15.2		330
MFG1_3 (N-GFP)	MFG1	3643884	XP_714447.2	4738	6280	30890	MFG1_3_BR1_IDA_TOF3_P50	30890_MFG1_3_BR1_IDA_TOF3_P50_Wrong.wiff	RPA190	3647643	XP_710761	1	XP_710723.1	38	30	0.44	23.2		1665
MFG1_3 (N-GFP)	MFG1	3643884	XP_714447.2	4738	6280	30890	MFG1_3_BR1_IDA_TOF3_P50	30890_MFG1_3_BR1_IDA_TOF3_P50_Wrong.wiff	CAALFM_C306970WA	3638506	XP_719899	0.9999	XP_719782.1	2	2	0.02	3.1		606
MFG1_3 (N-GFP)	MFG1	3643884	XP_714447.2	4738	6280	30890	MFG1_3_BR1_IDA_TOF3_P50	30890_MFG1_3_BR1_IDA_TOF3_P50_Wrong.wiff	GCN20	3639314	XP_719022	0.9999	XP_718920.1	2	2	0.02	2.8		751
MFG1_3 (N-GFP)	MFG1	3643884	XP_714447.2	4738	6280	30890	MFG1_3_BR1_IDA_TOF3_P50	30890_MFG1_3_BR1_IDA_TOF3_P50_Wrong.wiff	TMA19	3640399	XP_717958	0.9999	XP_717892.1	3	2	0.04	12		167
MFG1_3 (N-GFP)	MFG1	3643884	XP_714447.2	4738	6280	30890	MFG1_3_BR1_IDA_TOF3_P50	30890_MFG1_3_BR1_IDA_TOF3_P50_Wrong.wiff	NAM9	3640909	XP_717450	0.9999	XP_717361.1	3	3	0.03	6.1		461
MFG1_3 (N-GFP)	MFG1	3643884	XP_714447.2	4738	6280	30890	MFG1_3_BR1_IDA_TOF3_P50	30890_MFG1_3_BR1_IDA_TOF3_P50_Wrong.wiff	MTD1	3641033	XP_717291	0.9999	XP_717215.1	2	2	0.02	8.4		323
MFG1_3 (N-GFP)	MFG1	3643884	XP_714447.2	4738	6280	30890	MFG1_3_BR1_IDA_TOF3_P50	30890_MFG1_3_BR1_IDA_TOF3_P50_Wrong.wiff	CaO19.12711	3641989	XP_716377	0.9999	XP_716315.1	3	3	0.03	9.3		388
MFG1_3 (N-GFP)	MFG1	3643884	XP_714447.2	4738	6280	30890	MFG1_3_BR1_IDA_TOF3_P50	30890_MFG1_3_BR1_IDA_TOF3_P50_Wrong.wiff	SCP160	3641975	XP_716412	0.9999	XP_716350.1	5	4	0.04	2.7		1220
MFG1_3 (N-GFP)	MFG1	3643884	XP_714447.2	4738	6280	30890	MFG1_3_BR1_IDA_TOF3_P50	30890_MFG1_3_BR1_IDA_TOF3_P50_Wrong.wiff	APL4	3642516	XP_715826	0.9999	XP_715775.1	4	2	0.04	3.7		828
MFG1_3 (N-GFP)	MFG1	3643884	XP_714447.2	4738	6280	30890	MFG1_3_BR1_IDA_TOF3_P50	30890_MFG1_3_BR1_IDA_TOF3_P50_Wrong.wiff	PET123	3647114	XP_711279	0.9999	XP_711256.1	2	2	0.02	7.6		301
MFG1_3 (N-GFP)	MFG1	3643884	XP_714447.2	4738	6280	30890	MFG1_3_BR1_IDA_TOF3_P50	30890_MFG1_3_BR1_IDA_TOF3_P50_Wrong.wiff	ISW1	3644252	XP_714082	0.9999	XP_713881.1	2	2	0.02	2.7		859
MFG1_3 (N-GFP)	MFG1	3643884	XP_714447.2	4738	6280	30890	MFG1_3_BR1_IDA_TOF3_P50	30890_MFG1_3_BR1_IDA_TOF3_P50_Wrong.wiff	CAALFM_C301520CA	3636570	XP_721769	0.9998	XP_721648.1	3	2	0.02	5.7		353
MFG1_3 (N-GFP)	MFG1	3643884	XP_714447.2	4738	6280	30890	MFG1_3_BR1_IDA_TOF3_P50	30890_MFG1_3_BR1_IDA_TOF3_P50_Wrong.wiff	CDC73	3636830	XP_721481	0.9998	XP_721209.1	2	2	0.02	6.5		370
MFG1_3 (N-GFP)	MFG1	3643884	XP_714447.2	4738	6280	30890	MFG1_3_BR1_IDA_TOF3_P50	30890_MFG1_3_BR1_IDA_TOF3_P50_Wrong.wiff	ORC1	3636922	XP_721498	0.9998	XP_721227.1	3	2	0.03	3.5		805
MFG1_3 (N-GFP)	MFG1	3643884	XP_714447.2	4738	6280	30890	MFG1_3_BR1_IDA_TOF3_P50	30890_MFG1_3_BR1_IDA_TOF3_P50_Wrong.wiff	ROM2	3637279	XP_721146	0.9998	XP_721025.1	2	2	0.02	2		1381
MFG1_3 (N-GFP)	MFG1	3643884	XP_714447.2	4738	6280	30890	MFG1_3_BR1_IDA_TOF3_P50	30890_MFG1_3_BR1_IDA_TOF3_P50_Wrong.wiff	PDI1	3641367	XP_716953	0.9998	XP_716885.1; XP_888933.1	2	2	0.02	4.1		560
MFG1_3 (N-GFP)	MFG1	3643884	XP_714447.2	4738	6280	30890	MFG1_3_BR1_IDA_TOF3_P50	30890_MFG1_3_BR1_IDA_TOF3_P50_Wrong.wiff	CAALFM_C501140CA	3642663	XP_715719	0.9998	XP_715662.1	2	2	0.02	3.3		753
MFG1_3 (N-GFP)	MFG1	3643884	XP_714447.2	4738	6280	30890	MFG1_3_BR1_IDA_TOF3_P50	30890_MFG1_3_BR1_IDA_TOF3_P50_Wrong.wiff	DOT4	3646810	XP_711590	0.9998		2	2	0.02	3.1		735
MFG1_3 (N-GFP)	MFG1	3643884	XP_714447.2	4738	6280	30890	MFG1_3_BR1_IDA_TOF3_P50	30890_MFG1_3_BR1_IDA_TOF3_P50_Wrong.wiff	CAALFM_C700340CA	3638040	XP_720377	0.9997	XP_888668.1	2	2	0.02	2.4		971
MFG1_3 (N-GFP)	MFG1	3643884	XP_714447.2	4738	6280	30890	MFG1_3_BR1_IDA_TOF3_P50	30890_MFG1_3_BR1_IDA_TOF3_P50_Wrong.wiff	HHT1	3638444	XP_719887	0.9997	XP_719770.1	18	2	0.12	24.3		136
MFG1_3 (N-GFP)	MFG1	3643884	XP_714447.2	4738	6280	30890	MFG1_3_BR1_IDA_TOF3_P50	30890_MFG1_3_BR1_IDA_TOF3_P50_Wrong.wiff	RPA43	3640044	XP_718354	0.9997	XP_718259.1	2	2	0.02	10.7		299
MFG1_3 (N-GFP)	MFG1	3643884	XP_714447.2	4738	6280	30890	MFG1_3_BR1_IDA_TOF3_P50	30890_MFG1_3_BR1_IDA_TOF3_P50_Wrong.wiff	SKI2	3642143	XP_716263	0.9997	XP_716180.1	2	2	0.02	2		1245
MFG1_3 (N-GFP)	MFG1	3643884	XP_714447.2	4738	6280	30890	MFG1_3_BR1_IDA_TOF3_P50	30890_MFG1_3_BR1_IDA_TOF3_P50_Wrong.wiff	SEC16	3637670	XP_720780	0.9996	XP_720651.1	2	2	0.02	1.9		1947
MFG1_3 (N-GFP)	MFG1	3643884	XP_714447.2	4738	6280	30890	MFG1_3_BR1_IDA_TOF3_P50	30890_MFG1_3_BR1_IDA_TOF3_P50_Wrong.wiff	RRP9	3642509	XP_715811	0.9996	XP_715761.1	2	2	0.02	5.1		549
MFG1_3 (N-GFP)	MFG1	3643884	XP_714447.2	4738	6280	30890	MFG1_3_BR1_IDA_TOF3_P50	30890_MFG1_3_BR1_IDA_TOF3_P50_Wrong.wiff	GPD2	3644517	XP_713866	0.9996	XP_713824.1	2	2	0.02	7.3		371
MFG1_3 (N-GFP)	MFG1	3643884	XP_714447.2	4738	6280	30890	MFG1_3_BR1_IDA_TOF3_P50	30890_MFG1_3_BR1_IDA_TOF3_P50_Wrong.wiff	MPP10	3647912	XP_710480	0.9995	XP_710461.1	3	2	0.02	6.8		567
MFG1_3 (N-GFP)	MFG1	3643884	XP_714447.2	4738	6280	30890	MFG1_3_BR1_IDA_TOF3_P50	30890_MFG1_3_BR1_IDA_TOF3_P50_Wrong.wiff	CAALFM_C204850CA	3648114	XP_710285	0.9995		2	2	0.02	7.1		324
MFG1_3 (N-GFP)	MFG1	3643884	XP_714447.2	4738	6280	30890	MFG1_3_BR1_IDA_TOF3_P50	30890_MFG1_3_BR1_IDA_TOF3_P50_Wrong.wiff	LPD1	3645998	XP_712370	0.9994	XP_712334.1	3	3	0.02	6.3		491
MFG1_3 (N-GFP)	MFG1	3643884	XP_714447.2	4738	6280	30890	MFG1_3_BR1_IDA_TOF3_P50	30890_MFG1_3_BR1_IDA_TOF3_P50_Wrong.wiff	CaO19.11723	3637667	XP_720684	0.9993	XP_720557.1	2	2	0.02	9.6		301
MFG1_3 (N-GFP)	MFG1	3643884	XP_714447.2	4738	6280	30890	MFG1_3_BR1_IDA_TOF3_P50	30890_MFG1_3_BR1_IDA_TOF3_P50_Wrong.wiff	CAALFM_C603730CA	3640303	XP_718083	0.9986	XP_718017.1	2	2	0.02	3.9		460
MFG1_3 (N-GFP)	MFG1	3643884	XP_714447.2	4738	6280	30890	MFG1_3_BR1_IDA_TOF3_P50	30890_MFG1_3_BR1_IDA_TOF3_P50_Wrong.wiff	TCI1	3636016	XP_722285	0.9974	XP_722173.1	2	2	0.02	4.3		398
MFG1_3 (N-GFP)	MFG1	3643884	XP_714447.2	4738	6280	30890	MFG1_3_BR1_IDA_TOF3_P50	30890_MFG1_3_BR1_IDA_TOF3_P50_Wrong.wiff	CAALFM_C307420WA	3638485	XP_719845	0.9974	XP_719728.1	2	2	0.01	4.3		328
MFG1_3 (N-GFP)	MFG1	3643884	XP_714447.2	4738	6280	30890	MFG1_3_BR1_IDA_TOF3_P50	30890_MFG1_3_BR1_IDA_TOF3_P50_Wrong.wiff	EFB1	3641063	XP_717318	0.9973	XP_717242.1	2	2	0.02	11.3		230
MFG1_3 (N-GFP)	MFG1	3643884	XP_714447.2	4738	6280	30890	MFG1_3_BR1_IDA_TOF3_P50	30890_MFG1_3_BR1_IDA_TOF3_P50_Wrong.wiff	GEA2	3636646	XP_721784	0.997	XP_721663.1	2	2	0.02	2		1015
MFG1_3 (N-GFP)	MFG1	3643884	XP_714447.2	4738	6280	30890	MFG1_3_BR1_IDA_TOF3_P50	30890_MFG1_3_BR1_IDA_TOF3_P50_Wrong.wiff	CAALFM_C301430WA	3636633	XP_721779	0.9969	XP_721658.1	2	2	0.02	12.3		219
MFG1_3 (N-GFP)	MFG1	3643884	XP_714447.2	4738	6280	30890	MFG1_3_BR1_IDA_TOF3_P50	30890_MFG1_3_BR1_IDA_TOF3_P50_Wrong.wiff	UTP18	3643123	XP_715203	0.9965	XP_889022.1	2	2	0.02	5.3		552
MFG1_3 (N-GFP)	MFG1	3643884	XP_714447.2	4738	6280	30890	MFG1_3_BR1_IDA_TOF3_P50	30890_MFG1_3_BR1_IDA_TOF3_P50_Wrong.wiff	VAC8	3647410	XP_710992	0.9962	XP_710979.1	2	2	0.02	5		585
MFG1_3 (N-GFP)	MFG1	3643884	XP_714447.2	4738	6280	30890	MFG1_3_BR1_IDA_TOF3_P50	30890_MFG1_3_BR1_IDA_TOF3_P50_Wrong.wiff	RPT5	3642858	XP_715502	0.9959	XP_715432.1	2	2	0.02	4.6		454
MFG1_3 (N-GFP)	MFG1	3643884	XP_714447.2	4738	6280	30890	MFG1_3_BR1_IDA_TOF3_P50	30890_MFG1_3_BR1_IDA_TOF3_P50_Wrong.wiff	MRPL8	3646000	XP_712372	0.9959	XP_712336.1	2	2	0.02	9.4		255
MFG1_3 (N-GFP)	MFG1	3643884	XP_714447.2	4738	6280	30890	MFG1_3_BR1_IDA_TOF3_P50	30890_MFG1_3_BR1_IDA_TOF3_P50_Wrong.wiff	SEC7	3635220	XP_723159	0.9958	XP_723012.1	2	2	0.02	1.1		1839
MFG1_3 (N-GFP)	MFG1	3643884	XP_714447.2	4738	6280	30890	MFG1_3_BR1_IDA_TOF3_P50	30890_MFG1_3_BR1_IDA_TOF3_P50_Wrong.wiff	ECM32	3646609	XP_711793	0.9958	XP_711775.1	2	2	0.02	2.2		1105
MFG1_3 (N-GFP)	MFG1	3643884	XP_714447.2	4738	6280	30890	MFG1_3_BR1_IDA_TOF3_P50	30890_MFG1_3_BR1_IDA_TOF3_P50_Wrong.wiff	CAALFM_CR10400WA	3638956	XP_719378	0.9954		3	2	0.03	9		210
MFG1_3 (N-GFP)	MFG1	3643884	XP_714447.2	4738	6280	30890	MFG1_3_BR1_IDA_TOF3_P50	30890_MFG1_3_BR1_IDA_TOF3_P50_Wrong.wiff	FAS2	3635222	XP_723161	0.9953	XP_723014.1	2	2	0.02	2.9		905
MFG1_3 (N-GFP)	MFG1	3643884	XP_714447.2	4738	6280	30890	MFG1_3_BR1_IDA_TOF3_P50	30890_MFG1_3_BR1_IDA_TOF3_P50_Wrong.wiff	SEC13	3638207	XP_720143	0.9949	XP_720011.1	2	2	0.02	8.4		370
MFG1_3 (N-GFP)	MFG1	3643884	XP_714447.2	4738	6280	30890	MFG1_3_BR1_IDA_TOF3_P50	30890_MFG1_3_BR1_IDA_TOF3_P50_Wrong.wiff	CAALFM_C307630CA	3638491	XP_719825	0.9949	XP_719708.1	2	2	0.02	6.6		332
MFG1_3 (N-GFP)	MFG1	3643884	XP_714447.2	4738	6280	30890	MFG1_3_BR1_IDA_TOF3_P50	30890_MFG1_3_BR1_IDA_TOF3_P50_Wrong.wiff			DECOY10300	0.9883	DECOY10414	2	2	0.02	2.5	1
MFG1_3 (N-GFP)	MFG1	3643884	XP_714447.2	4738	6280	30890	MFG1_3_BR1_IDA_TOF3_P50	30890_MFG1_3_BR1_IDA_TOF3_P50_Wrong.wiff	LSC1	3639941	XP_718448	0.9864	XP_718181.1	2	2	0.02	8.7		323
MFG1_3 (N-GFP)	MFG1	3643884	XP_714447.2	4738	6280	30890	MFG1_3_BR1_IDA_TOF3_P50	30890_MFG1_3_BR1_IDA_TOF3_P50_Wrong.wiff	CaJ7_0349	3703877	XP_888915	0.9726		2	2	0.02	1.3		1690
MFG1_3 (N-GFP)	MFG1	3643884	XP_714447.2	4738	6280	30890	MFG1_3_BR1_IDA_TOF3_P50	30890_MFG1_3_BR1_IDA_TOF3_P50_Wrong.wiff	MCM3	3645163	XP_713204	0.9719	XP_713158.1	2	2	0.02	2.3		878
MFG1_3 (N-GFP)	MFG1	3643884	XP_714447.2	4738	6280	30890	MFG1_3_BR1_IDA_TOF3_P50	30890_MFG1_3_BR1_IDA_TOF3_P50_Wrong.wiff	GUA1	3634763	XP_723499	0.9642	XP_723309.1	2	2	0.02	3.6		530
MFG1_3 (N-GFP)	MFG1	3643884	XP_714447.2	4738	6280	30890	MFG1_3_BR1_IDA_TOF3_P50	30890_MFG1_3_BR1_IDA_TOF3_P50_Wrong.wiff	RPO21	3638991	XP_719414	0.9608		3	2	0.03	1.5		1728
MFG1_1 (N-GFP)	MFG1	3643884	XP_714447.2	4737	6279	30902	MFG1_1_BR2_IDA_TOF3_P50	30902_MFG1_1_BR2_IDA_TOF3_P50.wiff			ENSEMBL:ENSBTAP00000016046	1		3	3	0.04	5.9	1	706
MFG1_1 (N-GFP)	MFG1	3643884	XP_714447.2	4737	6279	30902	MFG1_1_BR2_IDA_TOF3_P50	30902_MFG1_1_BR2_IDA_TOF3_P50.wiff			ENSEMBL:ENSBTAP00000018574	1		6	6	0.07	12.9	1	496
MFG1_1 (N-GFP)	MFG1	3643884	XP_714447.2	4737	6279	30902	MFG1_1_BR2_IDA_TOF3_P50	30902_MFG1_1_BR2_IDA_TOF3_P50.wiff			ENSEMBL:ENSBTAP00000024146	1		45	28	0.53	26.2	1	1477
MFG1_1 (N-GFP)	MFG1	3643884	XP_714447.2	4737	6279	30902	MFG1_1_BR2_IDA_TOF3_P50	30902_MFG1_1_BR2_IDA_TOF3_P50.wiff			ENSEMBL:ENSBTAP00000024462	1	ENSEMBL:ENSBTAP00000024466	3	3	0.04	10	1	419
MFG1_1 (N-GFP)	MFG1	3643884	XP_714447.2	4737	6279	30902	MFG1_1_BR2_IDA_TOF3_P50	30902_MFG1_1_BR2_IDA_TOF3_P50.wiff			ENSEMBL:ENSBTAP00000032840	1		4	4	0.05	6.1	1	825
MFG1_1 (N-GFP)	MFG1	3643884	XP_714447.2	4737	6279	30902	MFG1_1_BR2_IDA_TOF3_P50	30902_MFG1_1_BR2_IDA_TOF3_P50.wiff			P00761	1	TRYP_PIG	18	4	0.22	25.1	1	231
MFG1_1 (N-GFP)	MFG1	3643884	XP_714447.2	4737	6279	30902	MFG1_1_BR2_IDA_TOF3_P50	30902_MFG1_1_BR2_IDA_TOF3_P50.wiff	AHSG	280988	P12763	1		4	4	0.05	15.9		359
MFG1_1 (N-GFP)	MFG1	3643884	XP_714447.2	4737	6279	30902	MFG1_1_BR2_IDA_TOF3_P50	30902_MFG1_1_BR2_IDA_TOF3_P50.wiff	APOA1	281631	P15497	1		27	15	0.33	56.2		265
MFG1_1 (N-GFP)	MFG1	3643884	XP_714447.2	4737	6279	30902	MFG1_1_BR2_IDA_TOF3_P50	30902_MFG1_1_BR2_IDA_TOF3_P50.wiff	SERPINA1	280699	P34955	1		7	6	0.08	14.2		416
MFG1_1 (N-GFP)	MFG1	3643884	XP_714447.2	4737	6279	30902	MFG1_1_BR2_IDA_TOF3_P50	30902_MFG1_1_BR2_IDA_TOF3_P50.wiff			Q1RMK2	1		9	6	0.11	13.2	1	597
MFG1_1 (N-GFP)	MFG1	3643884	XP_714447.2	4737	6279	30902	MFG1_1_BR2_IDA_TOF3_P50	30902_MFG1_1_BR2_IDA_TOF3_P50.wiff	THBS1	281530	Q28194	1		2	2	0.02	1.5		1170
MFG1_1 (N-GFP)	MFG1	3643884	XP_714447.2	4737	6279	30902	MFG1_1_BR2_IDA_TOF3_P50	30902_MFG1_1_BR2_IDA_TOF3_P50.wiff	C7	507339	Q29RQ1	1		6	4	0.05	11.7		843
MFG1_1 (N-GFP)	MFG1	3643884	XP_714447.2	4737	6279	30902	MFG1_1_BR2_IDA_TOF3_P50	30902_MFG1_1_BR2_IDA_TOF3_P50.wiff	C3	280677	Q2UVX4	1		35	23	0.4	19.1		1662
MFG1_1 (N-GFP)	MFG1	3643884	XP_714447.2	4737	6279	30902	MFG1_1_BR2_IDA_TOF3_P50	30902_MFG1_1_BR2_IDA_TOF3_P50.wiff	APOA4	537301	Q32PJ2	1		10	10	0.12	34.7		380
MFG1_1 (N-GFP)	MFG1	3643884	XP_714447.2	4737	6279	30902	MFG1_1_BR2_IDA_TOF3_P50	30902_MFG1_1_BR2_IDA_TOF3_P50.wiff	CFB	514076	Q3KUS7	1		3	2	0.03	4.2		760
MFG1_1 (N-GFP)	MFG1	3643884	XP_714447.2	4737	6279	30902	MFG1_1_BR2_IDA_TOF3_P50	30902_MFG1_1_BR2_IDA_TOF3_P50.wiff	C9	526766	Q3MHN2	1		11	8	0.13	15.9		548
MFG1_1 (N-GFP)	MFG1	3643884	XP_714447.2	4737	6279	30902	MFG1_1_BR2_IDA_TOF3_P50	30902_MFG1_1_BR2_IDA_TOF3_P50.wiff	AGT	527114	Q3SZH5	1		5	3	0.06	9.9		424
MFG1_1 (N-GFP)	MFG1	3643884	XP_714447.2	4737	6279	30902	MFG1_1_BR2_IDA_TOF3_P50	30902_MFG1_1_BR2_IDA_TOF3_P50.wiff	ITIH4	513700	Q3T052	1		8	8	0.1	9.9		916
MFG1_1 (N-GFP)	MFG1	3643884	XP_714447.2	4737	6279	30902	MFG1_1_BR2_IDA_TOF3_P50	30902_MFG1_1_BR2_IDA_TOF3_P50.wiff	VTN	507525	Q3ZBS7	1		4	3	0.05	7.2		484
MFG1_1 (N-GFP)	MFG1	3643884	XP_714447.2	4737	6279	30902	MFG1_1_BR2_IDA_TOF3_P50	30902_MFG1_1_BR2_IDA_TOF3_P50.wiff	RPL7	6335362	XP_441054	1	XP_713533.1	12	5	0.13	17.6		295
MFG1_1 (N-GFP)	MFG1	3643884	XP_714447.2	4737	6279	30902	MFG1_1_BR2_IDA_TOF3_P50	30902_MFG1_1_BR2_IDA_TOF3_P50.wiff	SEC24	3634939	XP_723419	1	XP_723228.1	5	5	0.06	7.3		928
MFG1_1 (N-GFP)	MFG1	3643884	XP_714447.2	4737	6279	30902	MFG1_1_BR2_IDA_TOF3_P50	30902_MFG1_1_BR2_IDA_TOF3_P50.wiff	MSS116	3634792	XP_723426	1	XP_723235.1	19	15	0.23	30.7		668
MFG1_1 (N-GFP)	MFG1	3643884	XP_714447.2	4737	6279	30902	MFG1_1_BR2_IDA_TOF3_P50	30902_MFG1_1_BR2_IDA_TOF3_P50.wiff	COX5	3634768	XP_723445	1	XP_723256.1	4	4	0.05	29.7		165
MFG1_1 (N-GFP)	MFG1	3643884	XP_714447.2	4737	6279	30902	MFG1_1_BR2_IDA_TOF3_P50	30902_MFG1_1_BR2_IDA_TOF3_P50.wiff	YTM1	3634765	XP_723501	1	XP_723311.1	16	12	0.2	38.2		466
MFG1_1 (N-GFP)	MFG1	3643884	XP_714447.2	4737	6279	30902	MFG1_1_BR2_IDA_TOF3_P50	30902_MFG1_1_BR2_IDA_TOF3_P50.wiff	IDH1	3634893	XP_723512	1	XP_723322.1	5	5	0.06	26.9		193
MFG1_1 (N-GFP)	MFG1	3643884	XP_714447.2	4737	6279	30902	MFG1_1_BR2_IDA_TOF3_P50	30902_MFG1_1_BR2_IDA_TOF3_P50.wiff	CAALFM_C109710CA	3634818	XP_723521	1	XP_723331.1	4	4	0.05	10.2		527
MFG1_1 (N-GFP)	MFG1	3643884	XP_714447.2	4737	6279	30902	MFG1_1_BR2_IDA_TOF3_P50	30902_MFG1_1_BR2_IDA_TOF3_P50.wiff	CAALFM_C109790CA	3634843	XP_723530	1	XP_723340.1	3	3	0.03	9.4		381
MFG1_1 (N-GFP)	MFG1	3643884	XP_714447.2	4737	6279	30902	MFG1_1_BR2_IDA_TOF3_P50	30902_MFG1_1_BR2_IDA_TOF3_P50.wiff	MIR1	3634782	XP_723568	1	XP_723379.1	12	8	0.14	34.2		307
MFG1_1 (N-GFP)	MFG1	3643884	XP_714447.2	4737	6279	30902	MFG1_1_BR2_IDA_TOF3_P50	30902_MFG1_1_BR2_IDA_TOF3_P50.wiff	CAALFM_C110190WA	3634785	XP_723571	1	XP_723383.1	3	2	0.04	13.7		277
MFG1_1 (N-GFP)	MFG1	3643884	XP_714447.2	4737	6279	30902	MFG1_1_BR2_IDA_TOF3_P50	30902_MFG1_1_BR2_IDA_TOF3_P50.wiff	RPA34	3634883	XP_723578	1	XP_723390.1	9	6	0.11	20.4		240
MFG1_1 (N-GFP)	MFG1	3643884	XP_714447.2	4737	6279	30902	MFG1_1_BR2_IDA_TOF3_P50	30902_MFG1_1_BR2_IDA_TOF3_P50.wiff	SBP1	3635280	XP_723070	1	XP_722924.1	8	6	0.1	18.4		282
MFG1_1 (N-GFP)	MFG1	3643884	XP_714447.2	4737	6279	30902	MFG1_1_BR2_IDA_TOF3_P50	30902_MFG1_1_BR2_IDA_TOF3_P50.wiff	EGD2	3635284	XP_723074	1	XP_722928.1	2	2	0.02	16.9		178
MFG1_1 (N-GFP)	MFG1	3643884	XP_714447.2	4737	6279	30902	MFG1_1_BR2_IDA_TOF3_P50	30902_MFG1_1_BR2_IDA_TOF3_P50.wiff	CAALFM_C304370CA	3635172	XP_723100	1	XP_722953.1	27	23	0.31	22.2		1120
MFG1_1 (N-GFP)	MFG1	3643884	XP_714447.2	4737	6279	30902	MFG1_1_BR2_IDA_TOF3_P50	30902_MFG1_1_BR2_IDA_TOF3_P50.wiff	CAALFM_C304380CA	3635173	XP_723101	1	XP_722954.1	35	4	0.39	38.9		126
MFG1_1 (N-GFP)	MFG1	3643884	XP_714447.2	4737	6279	30902	MFG1_1_BR2_IDA_TOF3_P50	30902_MFG1_1_BR2_IDA_TOF3_P50.wiff	RPL19A	3635257	XP_723118	1	XP_722971.1	6	4	0.07	32.2		115
MFG1_1 (N-GFP)	MFG1	3643884	XP_714447.2	4737	6279	30902	MFG1_1_BR2_IDA_TOF3_P50	30902_MFG1_1_BR2_IDA_TOF3_P50.wiff	MAK21	3635147	XP_723125	1	XP_722978.1	15	12	0.17	17.1		1066
MFG1_1 (N-GFP)	MFG1	3643884	XP_714447.2	4737	6279	30902	MFG1_1_BR2_IDA_TOF3_P50	30902_MFG1_1_BR2_IDA_TOF3_P50.wiff	ZCF31	3635191	XP_723136	1	XP_722989.1	33	23	0.36	30.1		1130
MFG1_1 (N-GFP)	MFG1	3643884	XP_714447.2	4737	6279	30902	MFG1_1_BR2_IDA_TOF3_P50	30902_MFG1_1_BR2_IDA_TOF3_P50.wiff	RPS15	3635194	XP_723139	1	XP_722992.1	11	2	0.12	27.8		115
MFG1_1 (N-GFP)	MFG1	3643884	XP_714447.2	4737	6279	30902	MFG1_1_BR2_IDA_TOF3_P50	30902_MFG1_1_BR2_IDA_TOF3_P50.wiff	FAS2	3635222	XP_723161	1	XP_723014.1	4	3	0.05	4.5		905
MFG1_1 (N-GFP)	MFG1	3643884	XP_714447.2	4737	6279	30902	MFG1_1_BR2_IDA_TOF3_P50	30902_MFG1_1_BR2_IDA_TOF3_P50.wiff	FAS2	3635223	XP_723162	1	XP_723015.1	8	8	0.1	13.2		804
MFG1_1 (N-GFP)	MFG1	3643884	XP_714447.2	4737	6279	30902	MFG1_1_BR2_IDA_TOF3_P50	30902_MFG1_1_BR2_IDA_TOF3_P50.wiff	NOP14	3635266	XP_723170	1	XP_723023.1	8	7	0.09	8.7		842
MFG1_1 (N-GFP)	MFG1	3643884	XP_714447.2	4737	6279	30902	MFG1_1_BR2_IDA_TOF3_P50	30902_MFG1_1_BR2_IDA_TOF3_P50.wiff	RPL18	3635156	XP_723193	1	XP_723046.1	19	4	0.24	29.2		154
MFG1_1 (N-GFP)	MFG1	3643884	XP_714447.2	4737	6279	30902	MFG1_1_BR2_IDA_TOF3_P50	30902_MFG1_1_BR2_IDA_TOF3_P50.wiff	CAALFM_C305150WA	3635162	XP_723199	1	XP_723052.1	4	3	0.05	7.8		475
MFG1_1 (N-GFP)	MFG1	3643884	XP_714447.2	4737	6279	30902	MFG1_1_BR2_IDA_TOF3_P50	30902_MFG1_1_BR2_IDA_TOF3_P50.wiff	CAALFM_C305160CA	3635229	XP_723201	1	XP_723054.1	19	16	0.22	24.2		908
MFG1_1 (N-GFP)	MFG1	3643884	XP_714447.2	4737	6279	30902	MFG1_1_BR2_IDA_TOF3_P50	30902_MFG1_1_BR2_IDA_TOF3_P50.wiff	RPL8B	3635198	XP_723211	1	XP_723064.1	62	16	0.39	56.1		262
MFG1_1 (N-GFP)	MFG1	3643884	XP_714447.2	4737	6279	30902	MFG1_1_BR2_IDA_TOF3_P50	30902_MFG1_1_BR2_IDA_TOF3_P50.wiff	CaO19.12032	3635543	XP_722781	1	XP_722636.1	49	17	0.55	50.7		371
MFG1_1 (N-GFP)	MFG1	3643884	XP_714447.2	4737	6279	30902	MFG1_1_BR2_IDA_TOF3_P50	30902_MFG1_1_BR2_IDA_TOF3_P50.wiff	FBA1	3635548	XP_722836	1	XP_722690.1	6	5	0.07	18.7		359
MFG1_1 (N-GFP)	MFG1	3643884	XP_714447.2	4737	6279	30902	MFG1_1_BR2_IDA_TOF3_P50	30902_MFG1_1_BR2_IDA_TOF3_P50.wiff	NIP1	3635435	XP_722853	1	XP_722707.1	18	16	0.22	19.9		874
MFG1_1 (N-GFP)	MFG1	3643884	XP_714447.2	4737	6279	30902	MFG1_1_BR2_IDA_TOF3_P50	30902_MFG1_1_BR2_IDA_TOF3_P50.wiff	PWP1	3635456	XP_722858	1	XP_722712.1	15	12	0.19	25.7		612
MFG1_1 (N-GFP)	MFG1	3643884	XP_714447.2	4737	6279	30902	MFG1_1_BR2_IDA_TOF3_P50	30902_MFG1_1_BR2_IDA_TOF3_P50.wiff	BEM1	3635460	XP_722862	1	XP_722716.1	3	3	0.03	4.8		630
MFG1_1 (N-GFP)	MFG1	3643884	XP_714447.2	4737	6279	30902	MFG1_1_BR2_IDA_TOF3_P50	30902_MFG1_1_BR2_IDA_TOF3_P50.wiff	RPS6	3635476	XP_722877	1	XP_722731.1	14	5	0.17	29.3		205
MFG1_1 (N-GFP)	MFG1	3643884	XP_714447.2	4737	6279	30902	MFG1_1_BR2_IDA_TOF3_P50	30902_MFG1_1_BR2_IDA_TOF3_P50.wiff	SPT5	3635847	XP_722503	1	XP_722364.1	20	18	0.22	26.8		956
MFG1_1 (N-GFP)	MFG1	3643884	XP_714447.2	4737	6279	30902	MFG1_1_BR2_IDA_TOF3_P50	30902_MFG1_1_BR2_IDA_TOF3_P50.wiff	RPS26A	3635787	XP_722520	1	XP_722381.1	13	4	0.14	27.7		119
MFG1_1 (N-GFP)	MFG1	3643884	XP_714447.2	4737	6279	30902	MFG1_1_BR2_IDA_TOF3_P50	30902_MFG1_1_BR2_IDA_TOF3_P50.wiff	SNF2	3635855	XP_722570	1	XP_722432.1	3	3	0.03	2.1		1690
MFG1_1 (N-GFP)	MFG1	3643884	XP_714447.2	4737	6279	30902	MFG1_1_BR2_IDA_TOF3_P50	30902_MFG1_1_BR2_IDA_TOF3_P50.wiff	UTP21	3635757	XP_722608	1	XP_722467.1	4	4	0.05	6.2		942
MFG1_1 (N-GFP)	MFG1	3643884	XP_714447.2	4737	6279	30902	MFG1_1_BR2_IDA_TOF3_P50	30902_MFG1_1_BR2_IDA_TOF3_P50.wiff	UTP22	3635760	XP_722611	1	XP_722470.1	22	21	0.27	26.2		1175
MFG1_1 (N-GFP)	MFG1	3643884	XP_714447.2	4737	6279	30902	MFG1_1_BR2_IDA_TOF3_P50	30902_MFG1_1_BR2_IDA_TOF3_P50.wiff	CAALFM_C202540WA	3635820	XP_722620	1	XP_722479.1	33	27	0.36	18.7		1722
MFG1_1 (N-GFP)	MFG1	3643884	XP_714447.2	4737	6279	30902	MFG1_1_BR2_IDA_TOF3_P50	30902_MFG1_1_BR2_IDA_TOF3_P50.wiff	RPN1	3636051	XP_722279	1	XP_722167.1	5	4	0.05	4.9		994
MFG1_1 (N-GFP)	MFG1	3643884	XP_714447.2	4737	6279	30902	MFG1_1_BR2_IDA_TOF3_P50	30902_MFG1_1_BR2_IDA_TOF3_P50.wiff	KEM1	3636022	XP_722291	1	XP_722179.1	30	22	0.33	19.3		1469
MFG1_1 (N-GFP)	MFG1	3643884	XP_714447.2	4737	6279	30902	MFG1_1_BR2_IDA_TOF3_P50	30902_MFG1_1_BR2_IDA_TOF3_P50.wiff	HSP70	3636073	XP_722300	1	XP_722186.1	64	11	0.49	43.1		656
MFG1_1 (N-GFP)	MFG1	3643884	XP_714447.2	4737	6279	30902	MFG1_1_BR2_IDA_TOF3_P50	30902_MFG1_1_BR2_IDA_TOF3_P50.wiff	DIM1	3636084	XP_722328	1	XP_722214.1	4	4	0.04	13.8		326
MFG1_1 (N-GFP)	MFG1	3643884	XP_714447.2	4737	6279	30902	MFG1_1_BR2_IDA_TOF3_P50	30902_MFG1_1_BR2_IDA_TOF3_P50.wiff	DOR14	3636097	XP_722341	1	XP_722227.1	5	4	0.06	9.7		517
MFG1_1 (N-GFP)	MFG1	3643884	XP_714447.2	4737	6279	30902	MFG1_1_BR2_IDA_TOF3_P50	30902_MFG1_1_BR2_IDA_TOF3_P50.wiff	YBP1	3636047	XP_722350	1	XP_722236.1	3	3	0.04	4.5		665
MFG1_1 (N-GFP)	MFG1	3643884	XP_714447.2	4737	6279	30902	MFG1_1_BR2_IDA_TOF3_P50	30902_MFG1_1_BR2_IDA_TOF3_P50.wiff	SAH1	3636277	XP_721980	1	XP_721821.1	3	3	0.04	7.1		450
MFG1_1 (N-GFP)	MFG1	3643884	XP_714447.2	4737	6279	30902	MFG1_1_BR2_IDA_TOF3_P50	30902_MFG1_1_BR2_IDA_TOF3_P50.wiff	YTA7	3636302	XP_722018	1	XP_721858.1	5	4	0.06	4.8		1314
MFG1_1 (N-GFP)	MFG1	3643884	XP_714447.2	4737	6279	30902	MFG1_1_BR2_IDA_TOF3_P50	30902_MFG1_1_BR2_IDA_TOF3_P50.wiff	SSD1	3636358	XP_722028	1	XP_721868.1	7	5	0.07	6.3		1262
MFG1_1 (N-GFP)	MFG1	3643884	XP_714447.2	4737	6279	30902	MFG1_1_BR2_IDA_TOF3_P50	30902_MFG1_1_BR2_IDA_TOF3_P50.wiff	HAS1	3636361	XP_722031	1	XP_721871.1	17	12	0.2	25.1		569
MFG1_1 (N-GFP)	MFG1	3643884	XP_714447.2	4737	6279	30902	MFG1_1_BR2_IDA_TOF3_P50	30902_MFG1_1_BR2_IDA_TOF3_P50.wiff	PFK1	3636239	XP_722036	1	XP_721876.1	7	6	0.07	6.2		987
MFG1_1 (N-GFP)	MFG1	3643884	XP_714447.2	4737	6279	30902	MFG1_1_BR2_IDA_TOF3_P50	30902_MFG1_1_BR2_IDA_TOF3_P50.wiff	CaO19.11461	3636311	XP_722048	1	XP_721887.1	4	3	0.05	16.9		237
MFG1_1 (N-GFP)	MFG1	3643884	XP_714447.2	4737	6279	30902	MFG1_1_BR2_IDA_TOF3_P50	30902_MFG1_1_BR2_IDA_TOF3_P50.wiff	CCT3	3636327	XP_722073	1	XP_721912.1	7	6	0.08	16.3		529
MFG1_1 (N-GFP)	MFG1	3643884	XP_714447.2	4737	6279	30902	MFG1_1_BR2_IDA_TOF3_P50	30902_MFG1_1_BR2_IDA_TOF3_P50.wiff	COR1	3636339	XP_722085	1	XP_721924.1	7	6	0.09	20.5		439
MFG1_1 (N-GFP)	MFG1	3643884	XP_714447.2	4737	6279	30902	MFG1_1_BR2_IDA_TOF3_P50	30902_MFG1_1_BR2_IDA_TOF3_P50.wiff	CaO19.11504	3636319	XP_722090	1	XP_721929.1	4	3	0.04	10.2		303
MFG1_1 (N-GFP)	MFG1	3643884	XP_714447.2	4737	6279	30902	MFG1_1_BR2_IDA_TOF3_P50	30902_MFG1_1_BR2_IDA_TOF3_P50.wiff	APM1	3636342	XP_722105	1	XP_721944.1	3	2	0.04	6.2		438
MFG1_1 (N-GFP)	MFG1	3643884	XP_714447.2	4737	6279	30902	MFG1_1_BR2_IDA_TOF3_P50	30902_MFG1_1_BR2_IDA_TOF3_P50.wiff	CaO19.11525	3636348	XP_722111	1	XP_721951.1	2	2	0.02	3.3		752
MFG1_1 (N-GFP)	MFG1	3643884	XP_714447.2	4737	6279	30902	MFG1_1_BR2_IDA_TOF3_P50	30902_MFG1_1_BR2_IDA_TOF3_P50.wiff	CAALFM_C302350WA	3636618	XP_721688	1	XP_721568.1	7	5	0.07	10.7		666
MFG1_1 (N-GFP)	MFG1	3643884	XP_714447.2	4737	6279	30902	MFG1_1_BR2_IDA_TOF3_P50	30902_MFG1_1_BR2_IDA_TOF3_P50.wiff	ILV2	3636552	XP_721692	1	XP_721571.1	19	10	0.21	20.5		683
MFG1_1 (N-GFP)	MFG1	3643884	XP_714447.2	4737	6279	30902	MFG1_1_BR2_IDA_TOF3_P50	30902_MFG1_1_BR2_IDA_TOF3_P50.wiff	CAALFM_C302160CA	3636654	XP_721707	1	XP_721587.1	78	28	0.95	55.9		732
MFG1_1 (N-GFP)	MFG1	3643884	XP_714447.2	4737	6279	30902	MFG1_1_BR2_IDA_TOF3_P50	30902_MFG1_1_BR2_IDA_TOF3_P50.wiff	UTP4	3636657	XP_721710	1	XP_721590.1	6	6	0.07	8.6		743
MFG1_1 (N-GFP)	MFG1	3643884	XP_714447.2	4737	6279	30902	MFG1_1_BR2_IDA_TOF3_P50	30902_MFG1_1_BR2_IDA_TOF3_P50.wiff	RPL12	3636659	XP_721712	1	XP_721592.1	25	7	0.3	53.9		165
MFG1_1 (N-GFP)	MFG1	3643884	XP_714447.2	4737	6279	30902	MFG1_1_BR2_IDA_TOF3_P50	30902_MFG1_1_BR2_IDA_TOF3_P50.wiff	CAALFM_C302040CA	3636579	XP_721719	1	XP_721598.1	5	3	0.05	21.4		206
MFG1_1 (N-GFP)	MFG1	3643884	XP_714447.2	4737	6279	30902	MFG1_1_BR2_IDA_TOF3_P50	30902_MFG1_1_BR2_IDA_TOF3_P50.wiff	CAALFM_C302020WA	3636592	XP_721723	1	XP_721604.1	2	2	0.02	2.5		841
MFG1_1 (N-GFP)	MFG1	3643884	XP_714447.2	4737	6279	30902	MFG1_1_BR2_IDA_TOF3_P50	30902_MFG1_1_BR2_IDA_TOF3_P50.wiff	CAALFM_C301890CA	3636561	XP_721735	1	XP_721616.1	4	3	0.05	13.6		345
MFG1_1 (N-GFP)	MFG1	3643884	XP_714447.2	4737	6279	30902	MFG1_1_BR2_IDA_TOF3_P50	30902_MFG1_1_BR2_IDA_TOF3_P50.wiff	DBP5	3636564	XP_721738	1	XP_721619.1	13	12	0.14	25.4		540
MFG1_1 (N-GFP)	MFG1	3643884	XP_714447.2	4737	6279	30902	MFG1_1_BR2_IDA_TOF3_P50	30902_MFG1_1_BR2_IDA_TOF3_P50.wiff	CAALFM_C301720CA	3636601	XP_721749	1	XP_721630.1	25	21	0.28	25.7		1221
MFG1_1 (N-GFP)	MFG1	3643884	XP_714447.2	4737	6279	30902	MFG1_1_BR2_IDA_TOF3_P50	30902_MFG1_1_BR2_IDA_TOF3_P50.wiff	CAALFM_C301560WA	3636669	XP_721764	1	XP_721644.1	59	28	0.69	45.6		767
MFG1_1 (N-GFP)	MFG1	3643884	XP_714447.2	4737	6279	30902	MFG1_1_BR2_IDA_TOF3_P50	30902_MFG1_1_BR2_IDA_TOF3_P50.wiff	RPS7A	3636573	XP_721772	1	XP_721651.1	41	11	0.49	63.4		186
MFG1_1 (N-GFP)	MFG1	3643884	XP_714447.2	4737	6279	30902	MFG1_1_BR2_IDA_TOF3_P50	30902_MFG1_1_BR2_IDA_TOF3_P50.wiff	ARF3	3636628	XP_721774	1	XP_721653.1	3	3	0.04	21		162
MFG1_1 (N-GFP)	MFG1	3643884	XP_714447.2	4737	6279	30902	MFG1_1_BR2_IDA_TOF3_P50	30902_MFG1_1_BR2_IDA_TOF3_P50.wiff	CAALFM_C301430WA	3636633	XP_721779	1	XP_721658.1	2	2	0.02	12.3		219
MFG1_1 (N-GFP)	MFG1	3643884	XP_714447.2	4737	6279	30902	MFG1_1_BR2_IDA_TOF3_P50	30902_MFG1_1_BR2_IDA_TOF3_P50.wiff	CaO19.1732	3636613	XP_721803	1	XP_721683.1	3	3	0.04	5.3		620
MFG1_1 (N-GFP)	MFG1	3643884	XP_714447.2	4737	6279	30902	MFG1_1_BR2_IDA_TOF3_P50	30902_MFG1_1_BR2_IDA_TOF3_P50.wiff	RPL10	3636850	XP_721434	1	XP_721162.1	15	6	0.17	30		220
MFG1_1 (N-GFP)	MFG1	3643884	XP_714447.2	4737	6279	30902	MFG1_1_BR2_IDA_TOF3_P50	30902_MFG1_1_BR2_IDA_TOF3_P50.wiff	TIF34	3636872	XP_721466	1	XP_721194.1	14	10	0.17	36.6		350
MFG1_1 (N-GFP)	MFG1	3643884	XP_714447.2	4737	6279	30902	MFG1_1_BR2_IDA_TOF3_P50	30902_MFG1_1_BR2_IDA_TOF3_P50.wiff	YKT6	3636863	XP_721473	1	XP_721201.1	9	8	0.11	48		200
MFG1_1 (N-GFP)	MFG1	3643884	XP_714447.2	4737	6279	30902	MFG1_1_BR2_IDA_TOF3_P50	30902_MFG1_1_BR2_IDA_TOF3_P50.wiff	RPL13	3636841	XP_721492	1	XP_721220.1	13	5	0.15	23.8		202
MFG1_1 (N-GFP)	MFG1	3643884	XP_714447.2	4737	6279	30902	MFG1_1_BR2_IDA_TOF3_P50	30902_MFG1_1_BR2_IDA_TOF3_P50.wiff	ORC1	3636922	XP_721498	1	XP_721227.1	2	2	0.02	3.4		805
MFG1_1 (N-GFP)	MFG1	3643884	XP_714447.2	4737	6279	30902	MFG1_1_BR2_IDA_TOF3_P50	30902_MFG1_1_BR2_IDA_TOF3_P50.wiff	RPS1	3636924	XP_721500	1	XP_721229.1	29	10	0.33	40.6		256
MFG1_1 (N-GFP)	MFG1	3643884	XP_714447.2	4737	6279	30902	MFG1_1_BR2_IDA_TOF3_P50	30902_MFG1_1_BR2_IDA_TOF3_P50.wiff	CDC12	3636809	XP_721511	1	XP_721240.1	2	2	0.02	7.3		370
MFG1_1 (N-GFP)	MFG1	3643884	XP_714447.2	4737	6279	30902	MFG1_1_BR2_IDA_TOF3_P50	30902_MFG1_1_BR2_IDA_TOF3_P50.wiff	BMH1	3636810	XP_721512	1	XP_721241.1	7	6	0.09	23.1		264
MFG1_1 (N-GFP)	MFG1	3643884	XP_714447.2	4737	6279	30902	MFG1_1_BR2_IDA_TOF3_P50	30902_MFG1_1_BR2_IDA_TOF3_P50.wiff	RLI1	3636888	XP_721532	1	XP_721261.1	9	7	0.09	17.7		622
MFG1_1 (N-GFP)	MFG1	3643884	XP_714447.2	4737	6279	30902	MFG1_1_BR2_IDA_TOF3_P50	30902_MFG1_1_BR2_IDA_TOF3_P50.wiff	CAALFM_C103360WA	3636889	XP_721533	1	XP_721262.1	8	8	0.1	6.2		1410
MFG1_1 (N-GFP)	MFG1	3643884	XP_714447.2	4737	6279	30902	MFG1_1_BR2_IDA_TOF3_P50	30902_MFG1_1_BR2_IDA_TOF3_P50.wiff	CAALFM_C103370WA	3636891	XP_721535	1	XP_721264.1	6	6	0.07	9.5		629
MFG1_1 (N-GFP)	MFG1	3643884	XP_714447.2	4737	6279	30902	MFG1_1_BR2_IDA_TOF3_P50	30902_MFG1_1_BR2_IDA_TOF3_P50.wiff	RPN3	3636917	XP_721552	1	XP_721281.1	4	4	0.04	8.5		481
MFG1_1 (N-GFP)	MFG1	3643884	XP_714447.2	4737	6279	30902	MFG1_1_BR2_IDA_TOF3_P50	30902_MFG1_1_BR2_IDA_TOF3_P50.wiff	MRPL27	3636884	XP_721562	1	XP_721291.1	2	2	0.02	11.9		168
MFG1_1 (N-GFP)	MFG1	3643884	XP_714447.2	4737	6279	30902	MFG1_1_BR2_IDA_TOF3_P50	30902_MFG1_1_BR2_IDA_TOF3_P50.wiff	CYP1	3636978	XP_721313	1	XP_720801.1; XP_888857.1	3	2	0.04	22.2		162
MFG1_1 (N-GFP)	MFG1	3643884	XP_714447.2	4737	6279	30902	MFG1_1_BR2_IDA_TOF3_P50	30902_MFG1_1_BR2_IDA_TOF3_P50.wiff	HSP90	3636951	XP_721353	1	XP_720840.1; XP_888823.1	38	22	0.45	36.1		707
MFG1_1 (N-GFP)	MFG1	3643884	XP_714447.2	4737	6279	30902	MFG1_1_BR2_IDA_TOF3_P50	30902_MFG1_1_BR2_IDA_TOF3_P50.wiff	TOM40	3636968	XP_721362	1	XP_720849.1; XP_888817.1	3	3	0.04	11.5		390
MFG1_1 (N-GFP)	MFG1	3643884	XP_714447.2	4737	6279	30902	MFG1_1_BR2_IDA_TOF3_P50	30902_MFG1_1_BR2_IDA_TOF3_P50.wiff	PFK2	3637056	XP_721378	1	XP_720865.1; XP_888801.1	11	9	0.11	12.3		946
MFG1_1 (N-GFP)	MFG1	3643884	XP_714447.2	4737	6279	30902	MFG1_1_BR2_IDA_TOF3_P50	30902_MFG1_1_BR2_IDA_TOF3_P50.wiff	RPL5	3637057	XP_721379	1	XP_720866.1; XP_888800.1	8	5	0.1	25.2		298
MFG1_1 (N-GFP)	MFG1	3643884	XP_714447.2	4737	6279	30902	MFG1_1_BR2_IDA_TOF3_P50	30902_MFG1_1_BR2_IDA_TOF3_P50.wiff	LAT1	3636986	XP_721397	1	XP_720884.1; XP_888786.1	4	4	0.05	9.9		477
MFG1_1 (N-GFP)	MFG1	3643884	XP_714447.2	4737	6279	30902	MFG1_1_BR2_IDA_TOF3_P50	30902_MFG1_1_BR2_IDA_TOF3_P50.wiff	BEM2	3637044	XP_721409	1	XP_720896.1; XP_888778.1	11	11	0.13	6.7		2252
MFG1_1 (N-GFP)	MFG1	3643884	XP_714447.2	4737	6279	30902	MFG1_1_BR2_IDA_TOF3_P50	30902_MFG1_1_BR2_IDA_TOF3_P50.wiff	CAALFM_C701500WA	3637050	XP_721415	1	XP_720902.1; XP_888773.1	2	2	0.02	5.3		436
MFG1_1 (N-GFP)	MFG1	3643884	XP_714447.2	4737	6279	30902	MFG1_1_BR2_IDA_TOF3_P50	30902_MFG1_1_BR2_IDA_TOF3_P50.wiff	PRT1	3636959	XP_721420	1	XP_720907.1; XP_888768.1	16	14	0.2	25		739
MFG1_1 (N-GFP)	MFG1	3643884	XP_714447.2	4737	6279	30902	MFG1_1_BR2_IDA_TOF3_P50	30902_MFG1_1_BR2_IDA_TOF3_P50.wiff	NOP12	3637230	XP_721055	1	XP_720933.1	17	11	0.2	25.8		454
MFG1_1 (N-GFP)	MFG1	3643884	XP_714447.2	4737	6279	30902	MFG1_1_BR2_IDA_TOF3_P50	30902_MFG1_1_BR2_IDA_TOF3_P50.wiff	CaO19.8433	3637234	XP_721059	1	XP_720937.1	6	3	0.07	4.9		692
MFG1_1 (N-GFP)	MFG1	3643884	XP_714447.2	4737	6279	30902	MFG1_1_BR2_IDA_TOF3_P50	30902_MFG1_1_BR2_IDA_TOF3_P50.wiff	CaO19.8435	3637236	XP_721061	1	XP_720939.1	15	15	0.19	9.2		1914
MFG1_1 (N-GFP)	MFG1	3643884	XP_714447.2	4737	6279	30902	MFG1_1_BR2_IDA_TOF3_P50	30902_MFG1_1_BR2_IDA_TOF3_P50.wiff	CaO19.8442	3637303	XP_721068	1	XP_720946.1	3	3	0.04	14.8		189
MFG1_1 (N-GFP)	MFG1	3643884	XP_714447.2	4737	6279	30902	MFG1_1_BR2_IDA_TOF3_P50	30902_MFG1_1_BR2_IDA_TOF3_P50.wiff	GCD7	3637289	XP_721071	1	XP_720949.1	4	3	0.03	12.9		365
MFG1_1 (N-GFP)	MFG1	3643884	XP_714447.2	4737	6279	30902	MFG1_1_BR2_IDA_TOF3_P50	30902_MFG1_1_BR2_IDA_TOF3_P50.wiff	MRPL24	3637292	XP_721074	1	XP_720952.1	2	2	0.02	8.3		265
MFG1_1 (N-GFP)	MFG1	3643884	XP_714447.2	4737	6279	30902	MFG1_1_BR2_IDA_TOF3_P50	30902_MFG1_1_BR2_IDA_TOF3_P50.wiff	RPL21	3637227	XP_721086	1	XP_720964.1	7	4	0.08	44		109
MFG1_1 (N-GFP)	MFG1	3643884	XP_714447.2	4737	6279	30902	MFG1_1_BR2_IDA_TOF3_P50	30902_MFG1_1_BR2_IDA_TOF3_P50.wiff	GPM1	3637276	XP_721143	1	XP_721022.1	4	4	0.05	20.2		248
MFG1_1 (N-GFP)	MFG1	3643884	XP_714447.2	4737	6279	30902	MFG1_1_BR2_IDA_TOF3_P50	30902_MFG1_1_BR2_IDA_TOF3_P50.wiff	GCD11	3637619	XP_720662	1	XP_720534.1	12	10	0.14	25.8		534
MFG1_1 (N-GFP)	MFG1	3643884	XP_714447.2	4737	6279	30902	MFG1_1_BR2_IDA_TOF3_P50	30902_MFG1_1_BR2_IDA_TOF3_P50.wiff	CaO19.11703	3637622	XP_720665	1	XP_720538.1	2	2	0.02	9.2		327
MFG1_1 (N-GFP)	MFG1	3643884	XP_714447.2	4737	6279	30902	MFG1_1_BR2_IDA_TOF3_P50	30902_MFG1_1_BR2_IDA_TOF3_P50.wiff	RET2	3637630	XP_720673	1	XP_720546.1	5	5	0.06	11.2		573
MFG1_1 (N-GFP)	MFG1	3643884	XP_714447.2	4737	6279	30902	MFG1_1_BR2_IDA_TOF3_P50	30902_MFG1_1_BR2_IDA_TOF3_P50.wiff	TIF5	3637599	XP_720697	1	XP_720569.1	3	2	0.04	5.5		420
MFG1_1 (N-GFP)	MFG1	3643884	XP_714447.2	4737	6279	30902	MFG1_1_BR2_IDA_TOF3_P50	30902_MFG1_1_BR2_IDA_TOF3_P50.wiff	JSN1	3637600	XP_720698	1	XP_720570.1	2	2	0.02	6.1		492
MFG1_1 (N-GFP)	MFG1	3643884	XP_714447.2	4737	6279	30902	MFG1_1_BR2_IDA_TOF3_P50	30902_MFG1_1_BR2_IDA_TOF3_P50.wiff	CaO19.11744	3637636	XP_720704	1	XP_720576.1	8	8	0.09	12.8		799
MFG1_1 (N-GFP)	MFG1	3643884	XP_714447.2	4737	6279	30902	MFG1_1_BR2_IDA_TOF3_P50	30902_MFG1_1_BR2_IDA_TOF3_P50.wiff	CaO19.11759	3637587	XP_720719	1	XP_720591.1	5	5	0.06	25.1		335
MFG1_1 (N-GFP)	MFG1	3643884	XP_714447.2	4737	6279	30902	MFG1_1_BR2_IDA_TOF3_P50	30902_MFG1_1_BR2_IDA_TOF3_P50.wiff	RPS5	3637570	XP_720769	1	XP_720641.1	12	7	0.14	32		225
MFG1_1 (N-GFP)	MFG1	3643884	XP_714447.2	4737	6279	30902	MFG1_1_BR2_IDA_TOF3_P50	30902_MFG1_1_BR2_IDA_TOF3_P50.wiff	CAALFM_C403290WA	3637887	XP_720417	1	XP_720189.1	8	7	0.08	10.8		899
MFG1_1 (N-GFP)	MFG1	3643884	XP_714447.2	4737	6279	30902	MFG1_1_BR2_IDA_TOF3_P50	30902_MFG1_1_BR2_IDA_TOF3_P50.wiff	RPF1	3637890	XP_720420	1	XP_720192.1	9	5	0.1	24.7		296
MFG1_1 (N-GFP)	MFG1	3643884	XP_714447.2	4737	6279	30902	MFG1_1_BR2_IDA_TOF3_P50	30902_MFG1_1_BR2_IDA_TOF3_P50.wiff	NAN1	3637932	XP_720441	1	XP_720211.1	11	10	0.14	15.9		839
MFG1_1 (N-GFP)	MFG1	3643884	XP_714447.2	4737	6279	30902	MFG1_1_BR2_IDA_TOF3_P50	30902_MFG1_1_BR2_IDA_TOF3_P50.wiff	ZUO1	3637908	XP_720460	1	XP_720230.1	4	4	0.05	11		427
MFG1_1 (N-GFP)	MFG1	3643884	XP_714447.2	4737	6279	30902	MFG1_1_BR2_IDA_TOF3_P50	30902_MFG1_1_BR2_IDA_TOF3_P50.wiff	HCA4	3637911	XP_720463	1	XP_720233.1	6	6	0.07	10.7		765
MFG1_1 (N-GFP)	MFG1	3643884	XP_714447.2	4737	6279	30902	MFG1_1_BR2_IDA_TOF3_P50	30902_MFG1_1_BR2_IDA_TOF3_P50.wiff	SAS10	3637899	XP_720467	1	XP_720237.1	3	2	0.03	6.2		564
MFG1_1 (N-GFP)	MFG1	3643884	XP_714447.2	4737	6279	30902	MFG1_1_BR2_IDA_TOF3_P50	30902_MFG1_1_BR2_IDA_TOF3_P50.wiff	CAALFM_C402780WA	3637902	XP_720470	1	XP_720240.1	5	4	0.06	10.7		544
MFG1_1 (N-GFP)	MFG1	3643884	XP_714447.2	4737	6279	30902	MFG1_1_BR2_IDA_TOF3_P50	30902_MFG1_1_BR2_IDA_TOF3_P50.wiff	CAALFM_C701030CA	3638019	XP_720305	1	XP_888733.1	22	17	0.24	21.7		1217
MFG1_1 (N-GFP)	MFG1	3643884	XP_714447.2	4737	6279	30902	MFG1_1_BR2_IDA_TOF3_P50	30902_MFG1_1_BR2_IDA_TOF3_P50.wiff	RPP0	3638023	XP_720309	1	XP_888730.1	28	9	0.33	38.1		312
MFG1_1 (N-GFP)	MFG1	3643884	XP_714447.2	4737	6279	30902	MFG1_1_BR2_IDA_TOF3_P50	30902_MFG1_1_BR2_IDA_TOF3_P50.wiff	PHM5	3637951	XP_720310	1	XP_888729.1	3	2	0.03	4.4		662
MFG1_1 (N-GFP)	MFG1	3643884	XP_714447.2	4737	6279	30902	MFG1_1_BR2_IDA_TOF3_P50	30902_MFG1_1_BR2_IDA_TOF3_P50.wiff	RPS18	3637953	XP_720312	1	XP_888727.1	11	5	0.14	37.8		135
MFG1_1 (N-GFP)	MFG1	3643884	XP_714447.2	4737	6279	30902	MFG1_1_BR2_IDA_TOF3_P50	30902_MFG1_1_BR2_IDA_TOF3_P50.wiff	YML6	3637954	XP_720313	1	XP_888726.1	3	3	0.04	13.3		278
MFG1_1 (N-GFP)	MFG1	3643884	XP_714447.2	4737	6279	30902	MFG1_1_BR2_IDA_TOF3_P50	30902_MFG1_1_BR2_IDA_TOF3_P50.wiff	NOP15	3637966	XP_720342	1	XP_888701.1	11	6	0.12	27		267
MFG1_1 (N-GFP)	MFG1	3643884	XP_714447.2	4737	6279	30902	MFG1_1_BR2_IDA_TOF3_P50	30902_MFG1_1_BR2_IDA_TOF3_P50.wiff	GUS1	3638029	XP_720349	1	XP_888694.1	5	5	0.05	6.9		725
MFG1_1 (N-GFP)	MFG1	3643884	XP_714447.2	4737	6279	30902	MFG1_1_BR2_IDA_TOF3_P50	30902_MFG1_1_BR2_IDA_TOF3_P50.wiff	RPA135	3637996	XP_720354	1	XP_888689.1	60	36	0.71	42		1166
MFG1_1 (N-GFP)	MFG1	3643884	XP_714447.2	4737	6279	30902	MFG1_1_BR2_IDA_TOF3_P50	30902_MFG1_1_BR2_IDA_TOF3_P50.wiff	CAALFM_C700350CA	3638039	XP_720376	1	XP_888669.1	19	11	0.22	31.2		439
MFG1_1 (N-GFP)	MFG1	3643884	XP_714447.2	4737	6279	30902	MFG1_1_BR2_IDA_TOF3_P50	30902_MFG1_1_BR2_IDA_TOF3_P50.wiff	CAALFM_C700250CA	3637979	XP_720388	1	XP_888659.1	16	8	0.19	52.9		187
MFG1_1 (N-GFP)	MFG1	3643884	XP_714447.2	4737	6279	30902	MFG1_1_BR2_IDA_TOF3_P50	30902_MFG1_1_BR2_IDA_TOF3_P50.wiff	RVS161	3638005	XP_720414	1	XP_888636.1	7	5	0.08	24.6		293
MFG1_1 (N-GFP)	MFG1	3643884	XP_714447.2	4737	6279	30902	MFG1_1_BR2_IDA_TOF3_P50	30902_MFG1_1_BR2_IDA_TOF3_P50.wiff	RPL9	3638287	XP_720065	1	XP_719935.1	14	8	0.15	43.5		191
MFG1_1 (N-GFP)	MFG1	3643884	XP_714447.2	4737	6279	30902	MFG1_1_BR2_IDA_TOF3_P50	30902_MFG1_1_BR2_IDA_TOF3_P50.wiff	STH1	3638290	XP_720068	1	XP_719938.1	5	5	0.06	4.5		1303
MFG1_1 (N-GFP)	MFG1	3643884	XP_714447.2	4737	6279	30902	MFG1_1_BR2_IDA_TOF3_P50	30902_MFG1_1_BR2_IDA_TOF3_P50.wiff	SEC13	3638207	XP_720143	1	XP_720011.1	3	3	0.03	10.8		370
MFG1_1 (N-GFP)	MFG1	3643884	XP_714447.2	4737	6279	30902	MFG1_1_BR2_IDA_TOF3_P50	30902_MFG1_1_BR2_IDA_TOF3_P50.wiff	HTZ1	3638209	XP_720154	1	XP_720022.1	13	3	0.11	30.1		133
MFG1_1 (N-GFP)	MFG1	3643884	XP_714447.2	4737	6279	30902	MFG1_1_BR2_IDA_TOF3_P50	30902_MFG1_1_BR2_IDA_TOF3_P50.wiff	UTP9	3638451	XP_719810	1	XP_719693.1	9	6	0.09	22		445
MFG1_1 (N-GFP)	MFG1	3643884	XP_714447.2	4737	6279	30902	MFG1_1_BR2_IDA_TOF3_P50	30902_MFG1_1_BR2_IDA_TOF3_P50.wiff	CAALFM_C307630CA	3638491	XP_719825	1	XP_719708.1	2	2	0.02	4.8		332
MFG1_1 (N-GFP)	MFG1	3643884	XP_714447.2	4737	6279	30902	MFG1_1_BR2_IDA_TOF3_P50	30902_MFG1_1_BR2_IDA_TOF3_P50.wiff	TPI1	3638482	XP_719842	1	XP_719725.1	3	3	0.04	18.1		248
MFG1_1 (N-GFP)	MFG1	3643884	XP_714447.2	4737	6279	30902	MFG1_1_BR2_IDA_TOF3_P50	30902_MFG1_1_BR2_IDA_TOF3_P50.wiff	NOP13	3638469	XP_719862	1	XP_719745.1	7	6	0.06	19.9		396
MFG1_1 (N-GFP)	MFG1	3643884	XP_714447.2	4737	6279	30902	MFG1_1_BR2_IDA_TOF3_P50	30902_MFG1_1_BR2_IDA_TOF3_P50.wiff	GCD2	3638437	XP_719872	1	XP_719755.1	2	2	0.02	5.2		500
MFG1_1 (N-GFP)	MFG1	3643884	XP_714447.2	4737	6279	30902	MFG1_1_BR2_IDA_TOF3_P50	30902_MFG1_1_BR2_IDA_TOF3_P50.wiff	RPS12	3638438	XP_719881	1	XP_719764.1	4	3	0.05	20.3		143
MFG1_1 (N-GFP)	MFG1	3643884	XP_714447.2	4737	6279	30902	MFG1_1_BR2_IDA_TOF3_P50	30902_MFG1_1_BR2_IDA_TOF3_P50.wiff	SSN6	3638518	XP_719894	1	XP_719777.1	4	4	0.05	4.3		1080
MFG1_1 (N-GFP)	MFG1	3643884	XP_714447.2	4737	6279	30902	MFG1_1_BR2_IDA_TOF3_P50	30902_MFG1_1_BR2_IDA_TOF3_P50.wiff	CAALFM_C306970WA	3638506	XP_719899	1	XP_719782.1	3	3	0.04	5.4		606
MFG1_1 (N-GFP)	MFG1	3643884	XP_714447.2	4737	6279	30902	MFG1_1_BR2_IDA_TOF3_P50	30902_MFG1_1_BR2_IDA_TOF3_P50.wiff	TPD3	3638512	XP_719905	1	XP_719788.1	11	9	0.13	18.7		643
MFG1_1 (N-GFP)	MFG1	3643884	XP_714447.2	4737	6279	30902	MFG1_1_BR2_IDA_TOF3_P50	30902_MFG1_1_BR2_IDA_TOF3_P50.wiff	TDH3	3638540	XP_719909	1	XP_719792.1	26	14	0.32	52.8		335
MFG1_1 (N-GFP)	MFG1	3643884	XP_714447.2	4737	6279	30902	MFG1_1_BR2_IDA_TOF3_P50	30902_MFG1_1_BR2_IDA_TOF3_P50.wiff	CAALFM_C306760WA	3638502	XP_719920	1	XP_719803.1	4	4	0.05	12.7		275
MFG1_1 (N-GFP)	MFG1	3643884	XP_714447.2	4737	6279	30902	MFG1_1_BR2_IDA_TOF3_P50	30902_MFG1_1_BR2_IDA_TOF3_P50.wiff	KAR2	3638764	XP_719590	1	XP_719462.1	45	19	0.46	33.6		687
MFG1_1 (N-GFP)	MFG1	3643884	XP_714447.2	4737	6279	30902	MFG1_1_BR2_IDA_TOF3_P50	30902_MFG1_1_BR2_IDA_TOF3_P50.wiff	RPA49	3638767	XP_719593	1	XP_719466.1	15	10	0.19	30.8		393
MFG1_1 (N-GFP)	MFG1	3643884	XP_714447.2	4737	6279	30902	MFG1_1_BR2_IDA_TOF3_P50	30902_MFG1_1_BR2_IDA_TOF3_P50.wiff	MRPL16	3638769	XP_719595	1	XP_719468.1	3	3	0.04	20.2		213
MFG1_1 (N-GFP)	MFG1	3643884	XP_714447.2	4737	6279	30902	MFG1_1_BR2_IDA_TOF3_P50	30902_MFG1_1_BR2_IDA_TOF3_P50.wiff	ARO8	3638758	XP_719668	1	XP_719544.1	6	5	0.07	13		491
MFG1_1 (N-GFP)	MFG1	3643884	XP_714447.2	4737	6279	30902	MFG1_1_BR2_IDA_TOF3_P50	30902_MFG1_1_BR2_IDA_TOF3_P50.wiff	NDT801	3638718	XP_719690	1	XP_719565.1	26	9	0.3	21.2		504
MFG1_1 (N-GFP)	MFG1	3643884	XP_714447.2	4737	6279	30902	MFG1_1_BR2_IDA_TOF3_P50	30902_MFG1_1_BR2_IDA_TOF3_P50.wiff	CAALFM_CR09740WA	3639008	XP_719308	1		7	6	0.07	23.3		399
MFG1_1 (N-GFP)	MFG1	3643884	XP_714447.2	4737	6279	30902	MFG1_1_BR2_IDA_TOF3_P50	30902_MFG1_1_BR2_IDA_TOF3_P50.wiff	SIK1	3638925	XP_719331	1		327	31	3.86	69.8		516
MFG1_1 (N-GFP)	MFG1	3643884	XP_714447.2	4737	6279	30902	MFG1_1_BR2_IDA_TOF3_P50	30902_MFG1_1_BR2_IDA_TOF3_P50.wiff	ZCF39	3639037	XP_719345	1		5	4	0.04	11.2		681
MFG1_1 (N-GFP)	MFG1	3643884	XP_714447.2	4737	6279	30902	MFG1_1_BR2_IDA_TOF3_P50	30902_MFG1_1_BR2_IDA_TOF3_P50.wiff	FAA4	3638973	XP_719354	1		2	2	0.02	3.7		696
MFG1_1 (N-GFP)	MFG1	3643884	XP_714447.2	4737	6279	30902	MFG1_1_BR2_IDA_TOF3_P50	30902_MFG1_1_BR2_IDA_TOF3_P50.wiff	UTP5	3638922	XP_719361	1		10	9	0.11	18.2		636
MFG1_1 (N-GFP)	MFG1	3643884	XP_714447.2	4737	6279	30902	MFG1_1_BR2_IDA_TOF3_P50	30902_MFG1_1_BR2_IDA_TOF3_P50.wiff	FDH3	3638923	XP_719362	1		2	2	0.02	10.2		255
MFG1_1 (N-GFP)	MFG1	3643884	XP_714447.2	4737	6279	30902	MFG1_1_BR2_IDA_TOF3_P50	30902_MFG1_1_BR2_IDA_TOF3_P50.wiff	TRX1	3638950	XP_719372	1		6	3	0.07	32		103
MFG1_1 (N-GFP)	MFG1	3643884	XP_714447.2	4737	6279	30902	MFG1_1_BR2_IDA_TOF3_P50	30902_MFG1_1_BR2_IDA_TOF3_P50.wiff	CAALFM_CR10410CA	3638957	XP_719379	1		2	2	0.02	8.7		276
MFG1_1 (N-GFP)	MFG1	3643884	XP_714447.2	4737	6279	30902	MFG1_1_BR2_IDA_TOF3_P50	30902_MFG1_1_BR2_IDA_TOF3_P50.wiff	CAALFM_CR10470CA	3638979	XP_719385	1		3	2	0.03	7		531
MFG1_1 (N-GFP)	MFG1	3643884	XP_714447.2	4737	6279	30902	MFG1_1_BR2_IDA_TOF3_P50	30902_MFG1_1_BR2_IDA_TOF3_P50.wiff	EIF4E	3638981	XP_719387	1		5	5	0.06	26.3		209
MFG1_1 (N-GFP)	MFG1	3643884	XP_714447.2	4737	6279	30902	MFG1_1_BR2_IDA_TOF3_P50	30902_MFG1_1_BR2_IDA_TOF3_P50.wiff	DRS1	3639045	XP_719395	1		10	8	0.11	15.8		613
MFG1_1 (N-GFP)	MFG1	3643884	XP_714447.2	4737	6279	30902	MFG1_1_BR2_IDA_TOF3_P50	30902_MFG1_1_BR2_IDA_TOF3_P50.wiff	CKA1	3639018	XP_719411	1		5	5	0.06	15.1		416
MFG1_1 (N-GFP)	MFG1	3643884	XP_714447.2	4737	6279	30902	MFG1_1_BR2_IDA_TOF3_P50	30902_MFG1_1_BR2_IDA_TOF3_P50.wiff	RFC4	3638994	XP_719417	1		2	2	0.02	6.8		323
MFG1_1 (N-GFP)	MFG1	3643884	XP_714447.2	4737	6279	30902	MFG1_1_BR2_IDA_TOF3_P50	30902_MFG1_1_BR2_IDA_TOF3_P50.wiff	CAALFM_CR10750CA	3638942	XP_719423	1		3	2	0.04	18.7		134
MFG1_1 (N-GFP)	MFG1	3643884	XP_714447.2	4737	6279	30902	MFG1_1_BR2_IDA_TOF3_P50	30902_MFG1_1_BR2_IDA_TOF3_P50.wiff	NAB3	3639067	XP_719211	1	XP_719094.1	7	6	0.08	9.4		836
MFG1_1 (N-GFP)	MFG1	3643884	XP_714447.2	4737	6279	30902	MFG1_1_BR2_IDA_TOF3_P50	30902_MFG1_1_BR2_IDA_TOF3_P50.wiff	MRT4	3639102	XP_719230	1	XP_719113.1	5	4	0.05	28.3		230
MFG1_1 (N-GFP)	MFG1	3643884	XP_714447.2	4737	6279	30902	MFG1_1_BR2_IDA_TOF3_P50	30902_MFG1_1_BR2_IDA_TOF3_P50.wiff	RNH12	3639090	XP_719243	1	XP_719126.1	13	8	0.16	32.3		232
MFG1_1 (N-GFP)	MFG1	3643884	XP_714447.2	4737	6279	30902	MFG1_1_BR2_IDA_TOF3_P50	30902_MFG1_1_BR2_IDA_TOF3_P50.wiff	SHE3	3639162	XP_719272	1	XP_719156.1	5	3	0.06	7.9		519
MFG1_1 (N-GFP)	MFG1	3643884	XP_714447.2	4737	6279	30902	MFG1_1_BR2_IDA_TOF3_P50	30902_MFG1_1_BR2_IDA_TOF3_P50.wiff	POL5	3639122	XP_719274	1	XP_719159.1	7	5	0.08	8.3		1055
MFG1_1 (N-GFP)	MFG1	3643884	XP_714447.2	4737	6279	30902	MFG1_1_BR2_IDA_TOF3_P50	30902_MFG1_1_BR2_IDA_TOF3_P50.wiff	CaO19.13072	3639134	XP_719303	1	XP_719187.1	2	2	0.02	8.4		369
MFG1_1 (N-GFP)	MFG1	3643884	XP_714447.2	4737	6279	30902	MFG1_1_BR2_IDA_TOF3_P50	30902_MFG1_1_BR2_IDA_TOF3_P50.wiff	RRS1	3639352	XP_718976	1	XP_718874.1	3	2	0.04	11.2		205
MFG1_1 (N-GFP)	MFG1	3643884	XP_714447.2	4737	6279	30902	MFG1_1_BR2_IDA_TOF3_P50	30902_MFG1_1_BR2_IDA_TOF3_P50.wiff	TUB2	3639329	XP_718996	1	XP_718894.1	20	7	0.22	24.8		303
MFG1_1 (N-GFP)	MFG1	3643884	XP_714447.2	4737	6279	30902	MFG1_1_BR2_IDA_TOF3_P50	30902_MFG1_1_BR2_IDA_TOF3_P50.wiff	TUF1	3639360	XP_719009	1	XP_718907.1	4	3	0.04	11.7		426
MFG1_1 (N-GFP)	MFG1	3643884	XP_714447.2	4737	6279	30902	MFG1_1_BR2_IDA_TOF3_P50	30902_MFG1_1_BR2_IDA_TOF3_P50.wiff	RPL16A	3639338	XP_719047	1	XP_718943.1	25	8	0.28	27.5		200
MFG1_1 (N-GFP)	MFG1	3643884	XP_714447.2	4737	6279	30902	MFG1_1_BR2_IDA_TOF3_P50	30902_MFG1_1_BR2_IDA_TOF3_P50.wiff	CAALFM_C100160CA	3639341	XP_719050	1	XP_718946.1	27	12	0.32	37		400
MFG1_1 (N-GFP)	MFG1	3643884	XP_714447.2	4737	6279	30902	MFG1_1_BR2_IDA_TOF3_P50	30902_MFG1_1_BR2_IDA_TOF3_P50.wiff	CCT8	3639324	XP_719058	1	XP_718954.1	13	13	0.15	29.6		540
MFG1_1 (N-GFP)	MFG1	3643884	XP_714447.2	4737	6279	30902	MFG1_1_BR2_IDA_TOF3_P50	30902_MFG1_1_BR2_IDA_TOF3_P50.wiff	DHH1	3639490	XP_718788	1	XP_718704.1	17	10	0.18	28.2		549
MFG1_1 (N-GFP)	MFG1	3643884	XP_714447.2	4737	6279	30902	MFG1_1_BR2_IDA_TOF3_P50	30902_MFG1_1_BR2_IDA_TOF3_P50.wiff	SUI2	3639569	XP_718803	1	XP_718720.1	11	7	0.13	22.7		300
MFG1_1 (N-GFP)	MFG1	3643884	XP_714447.2	4737	6279	30902	MFG1_1_BR2_IDA_TOF3_P50	30902_MFG1_1_BR2_IDA_TOF3_P50.wiff	PGA63	3639524	XP_718807	1	XP_718724.1	3	2	0.04	2.4		1265
MFG1_1 (N-GFP)	MFG1	3643884	XP_714447.2	4737	6279	30902	MFG1_1_BR2_IDA_TOF3_P50	30902_MFG1_1_BR2_IDA_TOF3_P50.wiff	NOP6	3639507	XP_718825	1	XP_718741.1	2	2	0.02	15.8		209
MFG1_1 (N-GFP)	MFG1	3643884	XP_714447.2	4737	6279	30902	MFG1_1_BR2_IDA_TOF3_P50	30902_MFG1_1_BR2_IDA_TOF3_P50.wiff	CAALFM_C106600WA	3639513	XP_718839	1	XP_718753.1	12	5	0.15	21.3		347
MFG1_1 (N-GFP)	MFG1	3643884	XP_714447.2	4737	6279	30902	MFG1_1_BR2_IDA_TOF3_P50	30902_MFG1_1_BR2_IDA_TOF3_P50.wiff	RPS22A	3639551	XP_718852	1	XP_718767.1	16	6	0.2	56.9		130
MFG1_1 (N-GFP)	MFG1	3643884	XP_714447.2	4737	6279	30902	MFG1_1_BR2_IDA_TOF3_P50	30902_MFG1_1_BR2_IDA_TOF3_P50.wiff	ACC1	3639688	XP_718624	1		22	20	0.25	12.2		2271
MFG1_1 (N-GFP)	MFG1	3643884	XP_714447.2	4737	6279	30902	MFG1_1_BR2_IDA_TOF3_P50	30902_MFG1_1_BR2_IDA_TOF3_P50.wiff	CAALFM_CR00460CA	3639726	XP_718645	1		6	3	0.07	19.7		183
MFG1_1 (N-GFP)	MFG1	3643884	XP_714447.2	4737	6279	30902	MFG1_1_BR2_IDA_TOF3_P50	30902_MFG1_1_BR2_IDA_TOF3_P50.wiff	NAP1	3639714	XP_718658	1		6	3	0.07	16.1		435
MFG1_1 (N-GFP)	MFG1	3643884	XP_714447.2	4737	6279	30902	MFG1_1_BR2_IDA_TOF3_P50	30902_MFG1_1_BR2_IDA_TOF3_P50.wiff	KIN2	3639697	XP_718667	1		3	3	0.04	3.2		1212
MFG1_1 (N-GFP)	MFG1	3643884	XP_714447.2	4737	6279	30902	MFG1_1_BR2_IDA_TOF3_P50	30902_MFG1_1_BR2_IDA_TOF3_P50.wiff	CAALFM_CR00130CA	3639709	XP_718679	1		2	2	0.02	3.3		390
MFG1_1 (N-GFP)	MFG1	3643884	XP_714447.2	4737	6279	30902	MFG1_1_BR2_IDA_TOF3_P50	30902_MFG1_1_BR2_IDA_TOF3_P50.wiff	MIS12	3639669	XP_718690	1		10	10	0.12	15.6		1025
MFG1_1 (N-GFP)	MFG1	3643884	XP_714447.2	4737	6279	30902	MFG1_1_BR2_IDA_TOF3_P50	30902_MFG1_1_BR2_IDA_TOF3_P50.wiff	SSE1	3639813	XP_718541	1	XP_718458.1	20	14	0.22	25.4		701
MFG1_1 (N-GFP)	MFG1	3643884	XP_714447.2	4737	6279	30902	MFG1_1_BR2_IDA_TOF3_P50	30902_MFG1_1_BR2_IDA_TOF3_P50.wiff	KAP123	3639740	XP_718593	1	XP_718510.1	22	17	0.25	21.1		1109
MFG1_1 (N-GFP)	MFG1	3643884	XP_714447.2	4737	6279	30902	MFG1_1_BR2_IDA_TOF3_P50	30902_MFG1_1_BR2_IDA_TOF3_P50.wiff	BMS1	3639801	XP_718605	1	XP_718522.1	14	12	0.16	13.6		1210
MFG1_1 (N-GFP)	MFG1	3643884	XP_714447.2	4737	6279	30902	MFG1_1_BR2_IDA_TOF3_P50	30902_MFG1_1_BR2_IDA_TOF3_P50.wiff	ARP9	3639769	XP_718608	1	XP_718525.1	4	3	0.05	6.6		484
MFG1_1 (N-GFP)	MFG1	3643884	XP_714447.2	4737	6279	30902	MFG1_1_BR2_IDA_TOF3_P50	30902_MFG1_1_BR2_IDA_TOF3_P50.wiff	TIF1	3639917	XP_718416	1	XP_718147.1	36	21	0.42	63.2		397
MFG1_1 (N-GFP)	MFG1	3643884	XP_714447.2	4737	6279	30902	MFG1_1_BR2_IDA_TOF3_P50	30902_MFG1_1_BR2_IDA_TOF3_P50.wiff	RPS2	3639967	XP_718427	1	XP_718157.1	14	7	0.17	34.1		249
MFG1_1 (N-GFP)	MFG1	3643884	XP_714447.2	4737	6279	30902	MFG1_1_BR2_IDA_TOF3_P50	30902_MFG1_1_BR2_IDA_TOF3_P50.wiff	CaO19.10846	3639968	XP_718428	1	XP_718158.1	2	2	0.02	13.5		200
MFG1_1 (N-GFP)	MFG1	3643884	XP_714447.2	4737	6279	30902	MFG1_1_BR2_IDA_TOF3_P50	30902_MFG1_1_BR2_IDA_TOF3_P50.wiff	LYS12	3640064	XP_718292	1	XP_718193.1	5	5	0.06	15.2		376
MFG1_1 (N-GFP)	MFG1	3643884	XP_714447.2	4737	6279	30902	MFG1_1_BR2_IDA_TOF3_P50	30902_MFG1_1_BR2_IDA_TOF3_P50.wiff	CaO19.10096	3639978	XP_718327	1	XP_718231.1	12	9	0.14	26.1		287
MFG1_1 (N-GFP)	MFG1	3643884	XP_714447.2	4737	6279	30902	MFG1_1_BR2_IDA_TOF3_P50	30902_MFG1_1_BR2_IDA_TOF3_P50.wiff	RPA43	3640044	XP_718354	1	XP_718259.1	4	2	0.04	13.7		299
MFG1_1 (N-GFP)	MFG1	3643884	XP_714447.2	4737	6279	30902	MFG1_1_BR2_IDA_TOF3_P50	30902_MFG1_1_BR2_IDA_TOF3_P50.wiff	CAALFM_C603550CA	3640246	XP_718060	1	XP_717994.1	10	9	0.12	21.3		539
MFG1_1 (N-GFP)	MFG1	3643884	XP_714447.2	4737	6279	30902	MFG1_1_BR2_IDA_TOF3_P50	30902_MFG1_1_BR2_IDA_TOF3_P50.wiff	NOG2	3640299	XP_718070	1	XP_718003.1	3	3	0.04	16.8		297
MFG1_1 (N-GFP)	MFG1	3643884	XP_714447.2	4737	6279	30902	MFG1_1_BR2_IDA_TOF3_P50	30902_MFG1_1_BR2_IDA_TOF3_P50.wiff	NOG2	3640300	XP_718071	1	XP_718004.1	3	2	0.03	21.1		175
MFG1_1 (N-GFP)	MFG1	3643884	XP_714447.2	4737	6279	30902	MFG1_1_BR2_IDA_TOF3_P50	30902_MFG1_1_BR2_IDA_TOF3_P50.wiff	ARC19	3640418	XP_717942	1	XP_717876.1	2	2	0.02	19.3		119
MFG1_1 (N-GFP)	MFG1	3643884	XP_714447.2	4737	6279	30902	MFG1_1_BR2_IDA_TOF3_P50	30902_MFG1_1_BR2_IDA_TOF3_P50.wiff	PWP2	3640416	XP_717966	1	XP_717900.1	5	4	0.06	4.8		922
MFG1_1 (N-GFP)	MFG1	3643884	XP_714447.2	4737	6279	30902	MFG1_1_BR2_IDA_TOF3_P50	30902_MFG1_1_BR2_IDA_TOF3_P50.wiff	GSY1	3640435	XP_717968	1	XP_717902.1	3	3	0.03	6.4		661
MFG1_1 (N-GFP)	MFG1	3643884	XP_714447.2	4737	6279	30902	MFG1_1_BR2_IDA_TOF3_P50	30902_MFG1_1_BR2_IDA_TOF3_P50.wiff	PMA1	3640531	XP_717759	1	XP_717665.1	20	14	0.24	19.6		895
MFG1_1 (N-GFP)	MFG1	3643884	XP_714447.2	4737	6279	30902	MFG1_1_BR2_IDA_TOF3_P50	30902_MFG1_1_BR2_IDA_TOF3_P50.wiff	SOF1	3640585	XP_717779	1	XP_717685.1	4	4	0.05	8.9		436
MFG1_1 (N-GFP)	MFG1	3643884	XP_714447.2	4737	6279	30902	MFG1_1_BR2_IDA_TOF3_P50	30902_MFG1_1_BR2_IDA_TOF3_P50.wiff	CAALFM_C300450CA	3640548	XP_717792	1	XP_717698.1	7	5	0.07	17.7		368
MFG1_1 (N-GFP)	MFG1	3643884	XP_714447.2	4737	6279	30902	MFG1_1_BR2_IDA_TOF3_P50	30902_MFG1_1_BR2_IDA_TOF3_P50.wiff	UTP8	3640547	XP_717808	1	XP_717714.1	6	5	0.07	7.8		720
MFG1_1 (N-GFP)	MFG1	3643884	XP_714447.2	4737	6279	30902	MFG1_1_BR2_IDA_TOF3_P50	30902_MFG1_1_BR2_IDA_TOF3_P50.wiff	RHR2	3640522	XP_717809	1	XP_717715.1	4	3	0.05	16.1		254
MFG1_1 (N-GFP)	MFG1	3643884	XP_714447.2	4737	6279	30902	MFG1_1_BR2_IDA_TOF3_P50	30902_MFG1_1_BR2_IDA_TOF3_P50.wiff	RPT2	3640525	XP_717812	1	XP_717718.1	3	3	0.04	8		465
MFG1_1 (N-GFP)	MFG1	3643884	XP_714447.2	4737	6279	30902	MFG1_1_BR2_IDA_TOF3_P50	30902_MFG1_1_BR2_IDA_TOF3_P50.wiff	RPS24	3640568	XP_717837	1	XP_717743.1	15	5	0.18	33.3		135
MFG1_1 (N-GFP)	MFG1	3643884	XP_714447.2	4737	6279	30902	MFG1_1_BR2_IDA_TOF3_P50	30902_MFG1_1_BR2_IDA_TOF3_P50.wiff	CAALFM_C107790CA	3640706	XP_717587	1	XP_717514.1	7	5	0.07	24.6		309
MFG1_1 (N-GFP)	MFG1	3643884	XP_714447.2	4737	6279	30902	MFG1_1_BR2_IDA_TOF3_P50	30902_MFG1_1_BR2_IDA_TOF3_P50.wiff	MRPL3	3640722	XP_717602	1	XP_717528.1	4	4	0.05	10.9		404
MFG1_1 (N-GFP)	MFG1	3643884	XP_714447.2	4737	6279	30902	MFG1_1_BR2_IDA_TOF3_P50	30902_MFG1_1_BR2_IDA_TOF3_P50.wiff	DPM1	3640700	XP_717611	1	XP_717537.1	4	3	0.04	20.1		239
MFG1_1 (N-GFP)	MFG1	3643884	XP_714447.2	4737	6279	30902	MFG1_1_BR2_IDA_TOF3_P50	30902_MFG1_1_BR2_IDA_TOF3_P50.wiff	DRG1	3640714	XP_717620	1	XP_717546.1	10	9	0.11	38.6		368
MFG1_1 (N-GFP)	MFG1	3643884	XP_714447.2	4737	6279	30902	MFG1_1_BR2_IDA_TOF3_P50	30902_MFG1_1_BR2_IDA_TOF3_P50.wiff	CAALFM_C108110WA	3640716	XP_717622	1	XP_717548.1	13	12	0.15	12.6		1091
MFG1_1 (N-GFP)	MFG1	3643884	XP_714447.2	4737	6279	30902	MFG1_1_BR2_IDA_TOF3_P50	30902_MFG1_1_BR2_IDA_TOF3_P50.wiff	DIP2	3640762	XP_717643	1	XP_717569.1	3	3	0.03	3.6		981
MFG1_1 (N-GFP)	MFG1	3643884	XP_714447.2	4737	6279	30902	MFG1_1_BR2_IDA_TOF3_P50	30902_MFG1_1_BR2_IDA_TOF3_P50.wiff	TKL1	3640767	XP_717648	1	XP_717574.1	14	9	0.16	18.9		677
MFG1_1 (N-GFP)	MFG1	3643884	XP_714447.2	4737	6279	30902	MFG1_1_BR2_IDA_TOF3_P50	30902_MFG1_1_BR2_IDA_TOF3_P50.wiff	RPT4	3640859	XP_717434	1	XP_717345.1	4	2	0.03	6.8		428
MFG1_1 (N-GFP)	MFG1	3643884	XP_714447.2	4737	6279	30902	MFG1_1_BR2_IDA_TOF3_P50	30902_MFG1_1_BR2_IDA_TOF3_P50.wiff	MEX67	3640921	XP_717440	1	XP_717351.1	3	3	0.04	6.6		617
MFG1_1 (N-GFP)	MFG1	3643884	XP_714447.2	4737	6279	30902	MFG1_1_BR2_IDA_TOF3_P50	30902_MFG1_1_BR2_IDA_TOF3_P50.wiff	RPL15	3640926	XP_717445	1	XP_717356.1	14	7	0.17	36.3		204
MFG1_1 (N-GFP)	MFG1	3643884	XP_714447.2	4737	6279	30902	MFG1_1_BR2_IDA_TOF3_P50	30902_MFG1_1_BR2_IDA_TOF3_P50.wiff	NOP2	3640912	XP_717453	1	XP_717364.1	8	6	0.09	10		618
MFG1_1 (N-GFP)	MFG1	3643884	XP_714447.2	4737	6279	30902	MFG1_1_BR2_IDA_TOF3_P50	30902_MFG1_1_BR2_IDA_TOF3_P50.wiff	CAP001	3640882	XP_717457	1	XP_717368.1	2	2	0.02	5		545
MFG1_1 (N-GFP)	MFG1	3643884	XP_714447.2	4737	6279	30902	MFG1_1_BR2_IDA_TOF3_P50	30902_MFG1_1_BR2_IDA_TOF3_P50.wiff	CaO19.8143	3640848	XP_717465	1	XP_717375.1	27	21	0.33	27.6		1042
MFG1_1 (N-GFP)	MFG1	3643884	XP_714447.2	4737	6279	30902	MFG1_1_BR2_IDA_TOF3_P50	30902_MFG1_1_BR2_IDA_TOF3_P50.wiff	NHP2	3640872	XP_717481	1	XP_717389.1	53	4	0.66	20.8		159
MFG1_1 (N-GFP)	MFG1	3643884	XP_714447.2	4737	6279	30902	MFG1_1_BR2_IDA_TOF3_P50	30902_MFG1_1_BR2_IDA_TOF3_P50.wiff	SEC26	3640891	XP_717483	1	XP_717391.1	16	14	0.18	19.3		952
MFG1_1 (N-GFP)	MFG1	3643884	XP_714447.2	4737	6279	30902	MFG1_1_BR2_IDA_TOF3_P50	30902_MFG1_1_BR2_IDA_TOF3_P50.wiff	HXK2	3640936	XP_717498	1	XP_717405.1	4	4	0.05	9.9		414
MFG1_1 (N-GFP)	MFG1	3643884	XP_714447.2	4737	6279	30902	MFG1_1_BR2_IDA_TOF3_P50	30902_MFG1_1_BR2_IDA_TOF3_P50.wiff	CDC10	3640905	XP_717505	1	XP_717411.1	3	3	0.04	10.6		357
MFG1_1 (N-GFP)	MFG1	3643884	XP_714447.2	4737	6279	30902	MFG1_1_BR2_IDA_TOF3_P50	30902_MFG1_1_BR2_IDA_TOF3_P50.wiff	RPL24	3641073	XP_717269	1	XP_717194.1	27	7	0.32	36.8		155
MFG1_1 (N-GFP)	MFG1	3643884	XP_714447.2	4737	6279	30902	MFG1_1_BR2_IDA_TOF3_P50	30902_MFG1_1_BR2_IDA_TOF3_P50.wiff	MRPL11	3641082	XP_717278	1	XP_717202.1	3	3	0.04	15.1		258
MFG1_1 (N-GFP)	MFG1	3643884	XP_714447.2	4737	6279	30902	MFG1_1_BR2_IDA_TOF3_P50	30902_MFG1_1_BR2_IDA_TOF3_P50.wiff	SSZ1	3641035	XP_717293	1	XP_717217.1	3	3	0.03	7		540
MFG1_1 (N-GFP)	MFG1	3643884	XP_714447.2	4737	6279	30902	MFG1_1_BR2_IDA_TOF3_P50	30902_MFG1_1_BR2_IDA_TOF3_P50.wiff	ZDS1	3641058	XP_717304	1	XP_717228.1	2	2	0.02	1.5		1645
MFG1_1 (N-GFP)	MFG1	3643884	XP_714447.2	4737	6279	30902	MFG1_1_BR2_IDA_TOF3_P50	30902_MFG1_1_BR2_IDA_TOF3_P50.wiff	CaO19.11312	3641090	XP_717311	1	XP_717235.1	15	10	0.18	38.8		276
MFG1_1 (N-GFP)	MFG1	3643884	XP_714447.2	4737	6279	30902	MFG1_1_BR2_IDA_TOF3_P50	30902_MFG1_1_BR2_IDA_TOF3_P50.wiff	PDB1	3641186	XP_717098	1	XP_717018.1	6	4	0.07	13.5		379
MFG1_1 (N-GFP)	MFG1	3643884	XP_714447.2	4737	6279	30902	MFG1_1_BR2_IDA_TOF3_P50	30902_MFG1_1_BR2_IDA_TOF3_P50.wiff	CaO19.5328	3641202	XP_717131	1	XP_717052.1	8	5	0.09	9.2		677
MFG1_1 (N-GFP)	MFG1	3643884	XP_714447.2	4737	6279	30902	MFG1_1_BR2_IDA_TOF3_P50	30902_MFG1_1_BR2_IDA_TOF3_P50.wiff	GCN1	3641256	XP_717136	1	XP_717057.1	12	12	0.14	9.9		1600
MFG1_1 (N-GFP)	MFG1	3643884	XP_714447.2	4737	6279	30902	MFG1_1_BR2_IDA_TOF3_P50	30902_MFG1_1_BR2_IDA_TOF3_P50.wiff	TIF11	3641208	XP_717154	1	XP_717075.1	2	2	0.02	13.6		154
MFG1_1 (N-GFP)	MFG1	3643884	XP_714447.2	4737	6279	30902	MFG1_1_BR2_IDA_TOF3_P50	30902_MFG1_1_BR2_IDA_TOF3_P50.wiff	CaO19.5126	3641354	XP_716949	1	XP_716881.1; XP_888936.1	4	2	0.04	16.3		184
MFG1_1 (N-GFP)	MFG1	3643884	XP_714447.2	4737	6279	30902	MFG1_1_BR2_IDA_TOF3_P50	30902_MFG1_1_BR2_IDA_TOF3_P50.wiff	CAALFM_C703270WA	3641365	XP_716951	1	XP_716883.1; XP_888935.1	5	5	0.05	14.1		397
MFG1_1 (N-GFP)	MFG1	3643884	XP_714447.2	4737	6279	30902	MFG1_1_BR2_IDA_TOF3_P50	30902_MFG1_1_BR2_IDA_TOF3_P50.wiff	PDI1	3641367	XP_716953	1	XP_716885.1; XP_888933.1	3	2	0.03	6.1		560
MFG1_1 (N-GFP)	MFG1	3643884	XP_714447.2	4737	6279	30902	MFG1_1_BR2_IDA_TOF3_P50	30902_MFG1_1_BR2_IDA_TOF3_P50.wiff	LMO1	3641403	XP_716970	1	XP_716903.1; XP_888916.1	4	4	0.05	7.9		521
MFG1_1 (N-GFP)	MFG1	3643884	XP_714447.2	4737	6279	30902	MFG1_1_BR2_IDA_TOF3_P50	30902_MFG1_1_BR2_IDA_TOF3_P50.wiff	PET9	3641531	XP_716829	1	XP_716769.1	31	11	0.37	42.5		301
MFG1_1 (N-GFP)	MFG1	3643884	XP_714447.2	4737	6279	30902	MFG1_1_BR2_IDA_TOF3_P50	30902_MFG1_1_BR2_IDA_TOF3_P50.wiff	CaO19.8548	3641534	XP_716832	1	XP_716772.1; XP_710134.1	2	2	0.02	17.2		169
MFG1_1 (N-GFP)	MFG1	3643884	XP_714447.2	4737	6279	30902	MFG1_1_BR2_IDA_TOF3_P50	30902_MFG1_1_BR2_IDA_TOF3_P50.wiff	NAM7	3641489	XP_716838	1	XP_716778.1	2	2	0.02	2.4		1019
MFG1_1 (N-GFP)	MFG1	3643884	XP_714447.2	4737	6279	30902	MFG1_1_BR2_IDA_TOF3_P50	30902_MFG1_1_BR2_IDA_TOF3_P50.wiff	SEC14	3641491	XP_716840	1	XP_716780.1	2	2	0.02	6.3		301
MFG1_1 (N-GFP)	MFG1	3643884	XP_714447.2	4737	6279	30902	MFG1_1_BR2_IDA_TOF3_P50	30902_MFG1_1_BR2_IDA_TOF3_P50.wiff	XDJ1	3641478	XP_716852	1	XP_716792.1	4	4	0.04	8.2		439
MFG1_1 (N-GFP)	MFG1	3643884	XP_714447.2	4737	6279	30902	MFG1_1_BR2_IDA_TOF3_P50	30902_MFG1_1_BR2_IDA_TOF3_P50.wiff	CaO19.8577	3641520	XP_716860	1	XP_716800.1	9	4	0.1	45.2		177
MFG1_1 (N-GFP)	MFG1	3643884	XP_714447.2	4737	6279	30902	MFG1_1_BR2_IDA_TOF3_P50	30902_MFG1_1_BR2_IDA_TOF3_P50.wiff	CaO19.8591	3641504	XP_716874	1	XP_716814.1	9	6	0.1	13.4		681
MFG1_1 (N-GFP)	MFG1	3643884	XP_714447.2	4737	6279	30902	MFG1_1_BR2_IDA_TOF3_P50	30902_MFG1_1_BR2_IDA_TOF3_P50.wiff	FAS1	3641494	XP_716877	1	XP_716817.1	23	22	0.28	13.4		2037
MFG1_1 (N-GFP)	MFG1	3643884	XP_714447.2	4737	6279	30902	MFG1_1_BR2_IDA_TOF3_P50	30902_MFG1_1_BR2_IDA_TOF3_P50.wiff	CAALFM_C601890CA	3641598	XP_716703	1	XP_716643.1	11	8	0.13	17.2		574
MFG1_1 (N-GFP)	MFG1	3643884	XP_714447.2	4737	6279	30902	MFG1_1_BR2_IDA_TOF3_P50	30902_MFG1_1_BR2_IDA_TOF3_P50.wiff	TIF3	3641646	XP_716731	1	XP_716672.1	7	5	0.08	14.7		455
MFG1_1 (N-GFP)	MFG1	3643884	XP_714447.2	4737	6279	30902	MFG1_1_BR2_IDA_TOF3_P50	30902_MFG1_1_BR2_IDA_TOF3_P50.wiff	ANB1	3641648	XP_716733	1	XP_716674.1	6	4	0.07	31.9		138
MFG1_1 (N-GFP)	MFG1	3643884	XP_714447.2	4737	6279	30902	MFG1_1_BR2_IDA_TOF3_P50	30902_MFG1_1_BR2_IDA_TOF3_P50.wiff	NOG1	3641736	XP_716625	1		29	21	0.34	34.7		640
MFG1_1 (N-GFP)	MFG1	3643884	XP_714447.2	4737	6279	30902	MFG1_1_BR2_IDA_TOF3_P50	30902_MFG1_1_BR2_IDA_TOF3_P50.wiff	PBS2	3641748	XP_716629	1		6	6	0.07	12.5		545
MFG1_1 (N-GFP)	MFG1	3643884	XP_714447.2	4737	6279	30902	MFG1_1_BR2_IDA_TOF3_P50	30902_MFG1_1_BR2_IDA_TOF3_P50.wiff	DED1	3641752	XP_716633	1		114	29	1.22	59.4		672
MFG1_1 (N-GFP)	MFG1	3643884	XP_714447.2	4737	6279	30902	MFG1_1_BR2_IDA_TOF3_P50	30902_MFG1_1_BR2_IDA_TOF3_P50.wiff	CaO19.1226	3641798	XP_716534	1	XP_716480.1	11	8	0.13	16.6		531
MFG1_1 (N-GFP)	MFG1	3643884	XP_714447.2	4737	6279	30902	MFG1_1_BR2_IDA_TOF3_P50	30902_MFG1_1_BR2_IDA_TOF3_P50.wiff	CAALFM_C107690CA	3641767	XP_716539	1	XP_716484.1	3	3	0.04	6		452
MFG1_1 (N-GFP)	MFG1	3643884	XP_714447.2	4737	6279	30902	MFG1_1_BR2_IDA_TOF3_P50	30902_MFG1_1_BR2_IDA_TOF3_P50.wiff	CAALFM_CR08920WA	3641911	XP_716423	1		3	3	0.04	7.5		440
MFG1_1 (N-GFP)	MFG1	3643884	XP_714447.2	4737	6279	30902	MFG1_1_BR2_IDA_TOF3_P50	30902_MFG1_1_BR2_IDA_TOF3_P50.wiff	CAALFM_CR08930CA	3641913	XP_716425	1		2	2	0.02	14.4		167
MFG1_1 (N-GFP)	MFG1	3643884	XP_714447.2	4737	6279	30902	MFG1_1_BR2_IDA_TOF3_P50	30902_MFG1_1_BR2_IDA_TOF3_P50.wiff	TUB1	3641930	XP_716442	1		21	7	0.26	27.6		323
MFG1_1 (N-GFP)	MFG1	3643884	XP_714447.2	4737	6279	30902	MFG1_1_BR2_IDA_TOF3_P50	30902_MFG1_1_BR2_IDA_TOF3_P50.wiff	ERG13	3641881	XP_716446	1		10	9	0.12	25.7		451
MFG1_1 (N-GFP)	MFG1	3643884	XP_714447.2	4737	6279	30902	MFG1_1_BR2_IDA_TOF3_P50	30902_MFG1_1_BR2_IDA_TOF3_P50.wiff	CAALFM_CR09240CA	3641919	XP_716456	1		5	5	0.06	38.1		147
MFG1_1 (N-GFP)	MFG1	3643884	XP_714447.2	4737	6279	30902	MFG1_1_BR2_IDA_TOF3_P50	30902_MFG1_1_BR2_IDA_TOF3_P50.wiff	ELF1	3641903	XP_716466	1		21	15	0.21	16.9		1195
MFG1_1 (N-GFP)	MFG1	3643884	XP_714447.2	4737	6279	30902	MFG1_1_BR2_IDA_TOF3_P50	30902_MFG1_1_BR2_IDA_TOF3_P50.wiff	RPN2	3641945	XP_716391	1	XP_716329.1	14	10	0.16	14.2		952
MFG1_1 (N-GFP)	MFG1	3643884	XP_714447.2	4737	6279	30902	MFG1_1_BR2_IDA_TOF3_P50	30902_MFG1_1_BR2_IDA_TOF3_P50.wiff	SCP160	3641975	XP_716412	1	XP_716350.1	3	3	0.03	2.2		1220
MFG1_1 (N-GFP)	MFG1	3643884	XP_714447.2	4737	6279	30902	MFG1_1_BR2_IDA_TOF3_P50	30902_MFG1_1_BR2_IDA_TOF3_P50.wiff	SSB1	3642095	XP_716208	1	XP_716124.1	79	24	0.92	51.7		613
MFG1_1 (N-GFP)	MFG1	3643884	XP_714447.2	4737	6279	30902	MFG1_1_BR2_IDA_TOF3_P50	30902_MFG1_1_BR2_IDA_TOF3_P50.wiff	RPS20	3642071	XP_716215	1	XP_716131.1	7	4	0.08	36.1		119
MFG1_1 (N-GFP)	MFG1	3643884	XP_714447.2	4737	6279	30902	MFG1_1_BR2_IDA_TOF3_P50	30902_MFG1_1_BR2_IDA_TOF3_P50.wiff	ACO1	3642090	XP_716225	1	XP_716141.1	3	3	0.04	4.2		777
MFG1_1 (N-GFP)	MFG1	3643884	XP_714447.2	4737	6279	30902	MFG1_1_BR2_IDA_TOF3_P50	30902_MFG1_1_BR2_IDA_TOF3_P50.wiff	CAALFM_CR08440WA	3642132	XP_716252	1	XP_716169.1	5	4	0.04	8.4		617
MFG1_1 (N-GFP)	MFG1	3643884	XP_714447.2	4737	6279	30902	MFG1_1_BR2_IDA_TOF3_P50	30902_MFG1_1_BR2_IDA_TOF3_P50.wiff	TSA1	3642269	XP_716082	1		11	5	0.13	32.1		196
MFG1_1 (N-GFP)	MFG1	3643884	XP_714447.2	4737	6279	30902	MFG1_1_BR2_IDA_TOF3_P50	30902_MFG1_1_BR2_IDA_TOF3_P50.wiff	CAALFM_C306370CA	3642258	XP_716087	1		2	2	0.02	6.4		390
MFG1_1 (N-GFP)	MFG1	3643884	XP_714447.2	4737	6279	30902	MFG1_1_BR2_IDA_TOF3_P50	30902_MFG1_1_BR2_IDA_TOF3_P50.wiff	CAALFM_C306700CA	3642247	XP_716120	1		8	6	0.1	13.5		613
MFG1_1 (N-GFP)	MFG1	3643884	XP_714447.2	4737	6279	30902	MFG1_1_BR2_IDA_TOF3_P50	30902_MFG1_1_BR2_IDA_TOF3_P50.wiff	KRE30	3642311	XP_716024	1	XP_715966.1	10	8	0.12	16.9		609
MFG1_1 (N-GFP)	MFG1	3643884	XP_714447.2	4737	6279	30902	MFG1_1_BR2_IDA_TOF3_P50	30902_MFG1_1_BR2_IDA_TOF3_P50.wiff	NSA1	3642313	XP_716026	1	XP_715968.1	8	6	0.09	19.5		406
MFG1_1 (N-GFP)	MFG1	3643884	XP_714447.2	4737	6279	30902	MFG1_1_BR2_IDA_TOF3_P50	30902_MFG1_1_BR2_IDA_TOF3_P50.wiff	RPT1	3642412	XP_715926	1	XP_715876.1	4	3	0.04	9.5		444
MFG1_1 (N-GFP)	MFG1	3643884	XP_714447.2	4737	6279	30902	MFG1_1_BR2_IDA_TOF3_P50	30902_MFG1_1_BR2_IDA_TOF3_P50.wiff	RRP9	3642509	XP_715811	1	XP_715761.1	4	3	0.04	6.6		549
MFG1_1 (N-GFP)	MFG1	3643884	XP_714447.2	4737	6279	30902	MFG1_1_BR2_IDA_TOF3_P50	30902_MFG1_1_BR2_IDA_TOF3_P50.wiff	SRP40	3642538	XP_715840	1	XP_715790.1	83	10	0.96	24.6		378
MFG1_1 (N-GFP)	MFG1	3643884	XP_714447.2	4737	6279	30902	MFG1_1_BR2_IDA_TOF3_P50	30902_MFG1_1_BR2_IDA_TOF3_P50.wiff	SNF1	3642643	XP_715699	1	XP_715642.1	10	8	0.11	15.4		618
MFG1_1 (N-GFP)	MFG1	3643884	XP_714447.2	4737	6279	30902	MFG1_1_BR2_IDA_TOF3_P50	30902_MFG1_1_BR2_IDA_TOF3_P50.wiff	VPS1	3642656	XP_715712	1	XP_715656.1	10	8	0.11	13.9		693
MFG1_1 (N-GFP)	MFG1	3643884	XP_714447.2	4737	6279	30902	MFG1_1_BR2_IDA_TOF3_P50	30902_MFG1_1_BR2_IDA_TOF3_P50.wiff	CAALFM_C501050CA	3642648	XP_715729	1	XP_715673.1	2	2	0.02	13.3		158
MFG1_1 (N-GFP)	MFG1	3643884	XP_714447.2	4737	6279	30902	MFG1_1_BR2_IDA_TOF3_P50	30902_MFG1_1_BR2_IDA_TOF3_P50.wiff	CaO19.10395	3642725	XP_715589	1	XP_715533.1	23	12	0.27	33.9		567
MFG1_1 (N-GFP)	MFG1	3643884	XP_714447.2	4737	6279	30902	MFG1_1_BR2_IDA_TOF3_P50	30902_MFG1_1_BR2_IDA_TOF3_P50.wiff	SPT16	3642741	XP_715596	1	XP_715540.1	3	2	0.03	2.9		1060
MFG1_1 (N-GFP)	MFG1	3643884	XP_714447.2	4737	6279	30902	MFG1_1_BR2_IDA_TOF3_P50	30902_MFG1_1_BR2_IDA_TOF3_P50.wiff	CaO19.10434	3642767	XP_715626	1	XP_715571.1	13	9	0.14	21.7		526
MFG1_1 (N-GFP)	MFG1	3643884	XP_714447.2	4737	6279	30902	MFG1_1_BR2_IDA_TOF3_P50	30902_MFG1_1_BR2_IDA_TOF3_P50.wiff	CaO19.10603	3642852	XP_715471	1	XP_715401.1	2	2	0.02	1.9		1432
MFG1_1 (N-GFP)	MFG1	3643884	XP_714447.2	4737	6279	30902	MFG1_1_BR2_IDA_TOF3_P50	30902_MFG1_1_BR2_IDA_TOF3_P50.wiff	PDA1	3642880	XP_715476	1	XP_715406.1	4	4	0.04	10		401
MFG1_1 (N-GFP)	MFG1	3643884	XP_714447.2	4737	6279	30902	MFG1_1_BR2_IDA_TOF3_P50	30902_MFG1_1_BR2_IDA_TOF3_P50.wiff	CCT6	3642861	XP_715505	1	XP_715435.1	4	4	0.05	11.8		559
MFG1_1 (N-GFP)	MFG1	3643884	XP_714447.2	4737	6279	30902	MFG1_1_BR2_IDA_TOF3_P50	30902_MFG1_1_BR2_IDA_TOF3_P50.wiff	RVB1	3642864	XP_715508	1	XP_715438.1	4	4	0.05	11.6		458
MFG1_1 (N-GFP)	MFG1	3643884	XP_714447.2	4737	6279	30902	MFG1_1_BR2_IDA_TOF3_P50	30902_MFG1_1_BR2_IDA_TOF3_P50.wiff	USP1	3642846	XP_715515	1	XP_715445.1	3	3	0.03	9.2		458
MFG1_1 (N-GFP)	MFG1	3643884	XP_714447.2	4737	6279	30902	MFG1_1_BR2_IDA_TOF3_P50	30902_MFG1_1_BR2_IDA_TOF3_P50.wiff	NOP1	3642887	XP_715517	1	XP_715447.1	391	19	4.66	57		316
MFG1_1 (N-GFP)	MFG1	3643884	XP_714447.2	4737	6279	30902	MFG1_1_BR2_IDA_TOF3_P50	30902_MFG1_1_BR2_IDA_TOF3_P50.wiff	RNR1	3642989	XP_715320	1	XP_715255.1	4	4	0.05	4.6		854
MFG1_1 (N-GFP)	MFG1	3643884	XP_714447.2	4737	6279	30902	MFG1_1_BR2_IDA_TOF3_P50	30902_MFG1_1_BR2_IDA_TOF3_P50.wiff	EFT2	3642998	XP_715329	1	XP_715264.1	31	21	0.37	30.7		830
MFG1_1 (N-GFP)	MFG1	3643884	XP_714447.2	4737	6279	30902	MFG1_1_BR2_IDA_TOF3_P50	30902_MFG1_1_BR2_IDA_TOF3_P50.wiff	PR26	3642981	XP_715334	1	XP_715269.1	8	5	0.08	19.7		411
MFG1_1 (N-GFP)	MFG1	3643884	XP_714447.2	4737	6279	30902	MFG1_1_BR2_IDA_TOF3_P50	30902_MFG1_1_BR2_IDA_TOF3_P50.wiff	RNR21	3643021	XP_715342	1	XP_715277.1	8	7	0.09	17.4		413
MFG1_1 (N-GFP)	MFG1	3643884	XP_714447.2	4737	6279	30902	MFG1_1_BR2_IDA_TOF3_P50	30902_MFG1_1_BR2_IDA_TOF3_P50.wiff	ALD5	3643026	XP_715347	1	XP_715282.1	3	3	0.03	7.6		499
MFG1_1 (N-GFP)	MFG1	3643884	XP_714447.2	4737	6279	30902	MFG1_1_BR2_IDA_TOF3_P50	30902_MFG1_1_BR2_IDA_TOF3_P50.wiff	NCB2	3643028	XP_715366	1	XP_715301.1	3	3	0.04	19.5		149
MFG1_1 (N-GFP)	MFG1	3643884	XP_714447.2	4737	6279	30902	MFG1_1_BR2_IDA_TOF3_P50	30902_MFG1_1_BR2_IDA_TOF3_P50.wiff	CAALFM_C202770WA	3643031	XP_715369	1	XP_715304.1	11	9	0.11	15.2		717
MFG1_1 (N-GFP)	MFG1	3643884	XP_714447.2	4737	6279	30902	MFG1_1_BR2_IDA_TOF3_P50	30902_MFG1_1_BR2_IDA_TOF3_P50.wiff	CAALFM_C202720WA	3643002	XP_715374	1	XP_715309.1	7	7	0.09	8.6		1002
MFG1_1 (N-GFP)	MFG1	3643884	XP_714447.2	4737	6279	30902	MFG1_1_BR2_IDA_TOF3_P50	30902_MFG1_1_BR2_IDA_TOF3_P50.wiff	SPT6	3643171	XP_715187	1	XP_889033.1	8	7	0.09	6.4		1401
MFG1_1 (N-GFP)	MFG1	3643884	XP_714447.2	4737	6279	30902	MFG1_1_BR2_IDA_TOF3_P50	30902_MFG1_1_BR2_IDA_TOF3_P50.wiff	CAALFM_C704200CA	3643122	XP_715202	1	XP_889023.1	5	5	0.05	7.6		1025
MFG1_1 (N-GFP)	MFG1	3643884	XP_714447.2	4737	6279	30902	MFG1_1_BR2_IDA_TOF3_P50	30902_MFG1_1_BR2_IDA_TOF3_P50.wiff	SUI3	3643130	XP_715210	1	XP_889016.1	13	7	0.15	33.5		281
MFG1_1 (N-GFP)	MFG1	3643884	XP_714447.2	4737	6279	30902	MFG1_1_BR2_IDA_TOF3_P50	30902_MFG1_1_BR2_IDA_TOF3_P50.wiff	MAM33	3643103	XP_715236	1	XP_888998.1	3	3	0.04	18.9		264
MFG1_1 (N-GFP)	MFG1	3643884	XP_714447.2	4737	6279	30902	MFG1_1_BR2_IDA_TOF3_P50	30902_MFG1_1_BR2_IDA_TOF3_P50.wiff	CAALFM_C703850WA	3643145	XP_715245	1	XP_888990.1	5	5	0.06	9.5		745
MFG1_1 (N-GFP)	MFG1	3643884	XP_714447.2	4737	6279	30902	MFG1_1_BR2_IDA_TOF3_P50	30902_MFG1_1_BR2_IDA_TOF3_P50.wiff	SLA2	3643149	XP_715249	1	XP_888986.1	7	7	0.07	7.3		1063
MFG1_1 (N-GFP)	MFG1	3643884	XP_714447.2	4737	6279	30902	MFG1_1_BR2_IDA_TOF3_P50	30902_MFG1_1_BR2_IDA_TOF3_P50.wiff	MRP7	3643118	XP_715251	1	XP_888984.1	3	3	0.04	10.8		389
MFG1_1 (N-GFP)	MFG1	3643884	XP_714447.2	4737	6279	30902	MFG1_1_BR2_IDA_TOF3_P50	30902_MFG1_1_BR2_IDA_TOF3_P50.wiff	MCM2	3643197	XP_715131	1	XP_715080.1	2	2	0.02	2.8		903
MFG1_1 (N-GFP)	MFG1	3643884	XP_714447.2	4737	6279	30902	MFG1_1_BR2_IDA_TOF3_P50	30902_MFG1_1_BR2_IDA_TOF3_P50.wiff	SGD1	3643191	XP_715139	1	XP_715088.1	3	3	0.04	4.7		1011
MFG1_1 (N-GFP)	MFG1	3643884	XP_714447.2	4737	6279	30902	MFG1_1_BR2_IDA_TOF3_P50	30902_MFG1_1_BR2_IDA_TOF3_P50.wiff	TAL1	3643225	XP_715147	1	XP_715096.1	2	2	0.02	6.5		323
MFG1_1 (N-GFP)	MFG1	3643884	XP_714447.2	4737	6279	30902	MFG1_1_BR2_IDA_TOF3_P50	30902_MFG1_1_BR2_IDA_TOF3_P50.wiff	CIT1	3643201	XP_715169	1	XP_715118.1	6	6	0.07	18.1		397
MFG1_1 (N-GFP)	MFG1	3643884	XP_714447.2	4737	6279	30902	MFG1_1_BR2_IDA_TOF3_P50	30902_MFG1_1_BR2_IDA_TOF3_P50.wiff	CAALFM_C114080WA	3643345	XP_715016	1		27	23	0.31	15.4		1818
MFG1_1 (N-GFP)	MFG1	3643884	XP_714447.2	4737	6279	30902	MFG1_1_BR2_IDA_TOF3_P50	30902_MFG1_1_BR2_IDA_TOF3_P50.wiff	RPL4B	3643347	XP_715018	1		30	12	0.37	46.6		363
MFG1_1 (N-GFP)	MFG1	3643884	XP_714447.2	4737	6279	30902	MFG1_1_BR2_IDA_TOF3_P50	30902_MFG1_1_BR2_IDA_TOF3_P50.wiff	CAALFM_C114240WA	3643306	XP_715034	1		9	9	0.09	18.7		561
MFG1_1 (N-GFP)	MFG1	3643884	XP_714447.2	4737	6279	30902	MFG1_1_BR2_IDA_TOF3_P50	30902_MFG1_1_BR2_IDA_TOF3_P50.wiff	TIF35	3643308	XP_715036	1		4	4	0.05	19		279
MFG1_1 (N-GFP)	MFG1	3643884	XP_714447.2	4737	6279	30902	MFG1_1_BR2_IDA_TOF3_P50	30902_MFG1_1_BR2_IDA_TOF3_P50.wiff	NPL3	3643310	XP_715038	1		357	12	4.3	41.6		286
MFG1_1 (N-GFP)	MFG1	3643884	XP_714447.2	4737	6279	30902	MFG1_1_BR2_IDA_TOF3_P50	30902_MFG1_1_BR2_IDA_TOF3_P50.wiff	CKA2	3643373	XP_714952	1	XP_714889.1	2	2	0.02	4.9		329
MFG1_1 (N-GFP)	MFG1	3643884	XP_714447.2	4737	6279	30902	MFG1_1_BR2_IDA_TOF3_P50	30902_MFG1_1_BR2_IDA_TOF3_P50.wiff	MAK5	3643358	XP_714962	1	XP_714899.1	12	9	0.13	14.3		782
MFG1_1 (N-GFP)	MFG1	3643884	XP_714447.2	4737	6279	30902	MFG1_1_BR2_IDA_TOF3_P50	30902_MFG1_1_BR2_IDA_TOF3_P50.wiff	SUP45	3643359	XP_714963	1	XP_714900.1	9	8	0.11	21.1		436
MFG1_1 (N-GFP)	MFG1	3643884	XP_714447.2	4737	6279	30902	MFG1_1_BR2_IDA_TOF3_P50	30902_MFG1_1_BR2_IDA_TOF3_P50.wiff	RPF2	3643394	XP_714974	1	XP_714912.1	12	10	0.15	31.2		327
MFG1_1 (N-GFP)	MFG1	3643884	XP_714447.2	4737	6279	30902	MFG1_1_BR2_IDA_TOF3_P50	30902_MFG1_1_BR2_IDA_TOF3_P50.wiff	RPC40	3643382	XP_714986	1	XP_714923.1	14	8	0.14	27.9		369
MFG1_1 (N-GFP)	MFG1	3643884	XP_714447.2	4737	6279	30902	MFG1_1_BR2_IDA_TOF3_P50	30902_MFG1_1_BR2_IDA_TOF3_P50.wiff	CDC19	3643409	XP_714997	1	XP_714934.1	21	10	0.24	27.2		504
MFG1_1 (N-GFP)	MFG1	3643884	XP_714447.2	4737	6279	30902	MFG1_1_BR2_IDA_TOF3_P50	30902_MFG1_1_BR2_IDA_TOF3_P50.wiff	ATP4	3643388	XP_715001	1	XP_714938.1	3	3	0.04	16.3		233
MFG1_1 (N-GFP)	MFG1	3643884	XP_714447.2	4737	6279	30902	MFG1_1_BR2_IDA_TOF3_P50	30902_MFG1_1_BR2_IDA_TOF3_P50.wiff	RPL11	3643489	XP_714823	1	XP_714763.1	19	7	0.22	30.1		166
MFG1_1 (N-GFP)	MFG1	3643884	XP_714447.2	4737	6279	30902	MFG1_1_BR2_IDA_TOF3_P50	30902_MFG1_1_BR2_IDA_TOF3_P50.wiff	CAALFM_C207100WA	3643504	XP_714855	1	XP_714793.1	4	3	0.04	7.7		469
MFG1_1 (N-GFP)	MFG1	3643884	XP_714447.2	4737	6279	30902	MFG1_1_BR2_IDA_TOF3_P50	30902_MFG1_1_BR2_IDA_TOF3_P50.wiff	CAALFM_C207190CA	3643513	XP_714864	1	XP_714802.1	3	3	0.04	14.9		174
MFG1_1 (N-GFP)	MFG1	3643884	XP_714447.2	4737	6279	30902	MFG1_1_BR2_IDA_TOF3_P50	30902_MFG1_1_BR2_IDA_TOF3_P50.wiff	ACH1	3643603	XP_714720	1	XP_714589.1	9	8	0.11	22.7		524
MFG1_1 (N-GFP)	MFG1	3643884	XP_714447.2	4737	6279	30902	MFG1_1_BR2_IDA_TOF3_P50	30902_MFG1_1_BR2_IDA_TOF3_P50.wiff	CDC24	3643614	XP_714723	1	XP_714592.1	3	2	0.03	3.6		844
MFG1_1 (N-GFP)	MFG1	3643884	XP_714447.2	4737	6279	30902	MFG1_1_BR2_IDA_TOF3_P50	30902_MFG1_1_BR2_IDA_TOF3_P50.wiff	NAT1	3643641	XP_714733	1	XP_714602.1	8	7	0.1	9.6		782
MFG1_1 (N-GFP)	MFG1	3643884	XP_714447.2	4737	6279	30902	MFG1_1_BR2_IDA_TOF3_P50	30902_MFG1_1_BR2_IDA_TOF3_P50.wiff	CCT7	3643626	XP_714755	1	XP_714622.1	8	8	0.1	21.7		549
MFG1_1 (N-GFP)	MFG1	3643884	XP_714447.2	4737	6279	30902	MFG1_1_BR2_IDA_TOF3_P50	30902_MFG1_1_BR2_IDA_TOF3_P50.wiff	YST1	3643678	XP_714681	1		3	2	0.04	11.5		217
MFG1_1 (N-GFP)	MFG1	3643884	XP_714447.2	4737	6279	30902	MFG1_1_BR2_IDA_TOF3_P50	30902_MFG1_1_BR2_IDA_TOF3_P50.wiff	TEA1	3643671	XP_714691	1		3	3	0.04	4.6		900
MFG1_1 (N-GFP)	MFG1	3643884	XP_714447.2	4737	6279	30902	MFG1_1_BR2_IDA_TOF3_P50	30902_MFG1_1_BR2_IDA_TOF3_P50.wiff	DNM1	3643673	XP_714693	1		7	6	0.09	9.6		866
MFG1_1 (N-GFP)	MFG1	3643884	XP_714447.2	4737	6279	30902	MFG1_1_BR2_IDA_TOF3_P50	30902_MFG1_1_BR2_IDA_TOF3_P50.wiff	SUP35	3643722	XP_714648	1	XP_714552.1	5	5	0.06	9.7		721
MFG1_1 (N-GFP)	MFG1	3643884	XP_714447.2	4737	6279	30902	MFG1_1_BR2_IDA_TOF3_P50	30902_MFG1_1_BR2_IDA_TOF3_P50.wiff	CaO19.8966	3643728	XP_714654	1	XP_714560.1	3	3	0.04	13.8		218
MFG1_1 (N-GFP)	MFG1	3643884	XP_714447.2	4737	6279	30902	MFG1_1_BR2_IDA_TOF3_P50	30902_MFG1_1_BR2_IDA_TOF3_P50.wiff	CCT2	3643685	XP_714667	1	XP_714573.1	2	2	0.02	4.9		526
MFG1_1 (N-GFP)	MFG1	3643884	XP_714447.2	4737	6279	30902	MFG1_1_BR2_IDA_TOF3_P50	30902_MFG1_1_BR2_IDA_TOF3_P50.wiff	IPP1	3643838	XP_714485	1	XP_714437.1	2	2	0.02	7.6		288
MFG1_1 (N-GFP)	MFG1	3643884	XP_714447.2	4737	6279	30902	MFG1_1_BR2_IDA_TOF3_P50	30902_MFG1_1_BR2_IDA_TOF3_P50.wiff	RPT6	3643827	XP_714488	1	XP_714440.1	9	5	0.09	21.9		401
MFG1_1 (N-GFP)	MFG1	3643884	XP_714447.2	4737	6279	30902	MFG1_1_BR2_IDA_TOF3_P50	30902_MFG1_1_BR2_IDA_TOF3_P50.wiff	CaO19.11086	3643841	XP_714496	1	XP_714447.1	200	27	2.31	47.4		758
MFG1_1 (N-GFP)	MFG1	3643884	XP_714447.2	4737	6279	30902	MFG1_1_BR2_IDA_TOF3_P50	30902_MFG1_1_BR2_IDA_TOF3_P50.wiff	CaO19.11092	3643847	XP_714502	1	XP_714453.1	3	3	0.04	7.8		423
MFG1_1 (N-GFP)	MFG1	3643884	XP_714447.2	4737	6279	30902	MFG1_1_BR2_IDA_TOF3_P50	30902_MFG1_1_BR2_IDA_TOF3_P50.wiff	RSP5	3643872	XP_714519	1	XP_714470.1	6	6	0.07	8.1		832
MFG1_1 (N-GFP)	MFG1	3643884	XP_714447.2	4737	6279	30902	MFG1_1_BR2_IDA_TOF3_P50	30902_MFG1_1_BR2_IDA_TOF3_P50.wiff	RRP8	3643857	XP_714521	1	XP_714472.1	7	5	0.08	16.6		428
MFG1_1 (N-GFP)	MFG1	3643884	XP_714447.2	4737	6279	30902	MFG1_1_BR2_IDA_TOF3_P50	30902_MFG1_1_BR2_IDA_TOF3_P50.wiff	SET2	3643923	XP_714401	1	XP_714361.1	11	10	0.14	14.6		844
MFG1_1 (N-GFP)	MFG1	3643884	XP_714447.2	4737	6279	30902	MFG1_1_BR2_IDA_TOF3_P50	30902_MFG1_1_BR2_IDA_TOF3_P50.wiff	GPD1	3643924	XP_714402	1	XP_714362.1	4	4	0.05	14.6		403
MFG1_1 (N-GFP)	MFG1	3643884	XP_714447.2	4737	6279	30902	MFG1_1_BR2_IDA_TOF3_P50	30902_MFG1_1_BR2_IDA_TOF3_P50.wiff	CYC1	3643937	XP_714415	1	XP_714375.1	3	3	0.04	31.8		110
MFG1_1 (N-GFP)	MFG1	3643884	XP_714447.2	4737	6279	30902	MFG1_1_BR2_IDA_TOF3_P50	30902_MFG1_1_BR2_IDA_TOF3_P50.wiff	GPX2	3644009	XP_714294	1	XP_714017.1	4	3	0.05	19.6		163
MFG1_1 (N-GFP)	MFG1	3643884	XP_714447.2	4737	6279	30902	MFG1_1_BR2_IDA_TOF3_P50	30902_MFG1_1_BR2_IDA_TOF3_P50.wiff	ILV5	3644012	XP_714297	1	XP_714020.1	3	3	0.04	9.2		400
MFG1_1 (N-GFP)	MFG1	3643884	XP_714447.2	4737	6279	30902	MFG1_1_BR2_IDA_TOF3_P50	30902_MFG1_1_BR2_IDA_TOF3_P50.wiff	TOP1	3644034	XP_714305	1	XP_714029.1	7	6	0.08	7.8		780
MFG1_1 (N-GFP)	MFG1	3643884	XP_714447.2	4737	6279	30902	MFG1_1_BR2_IDA_TOF3_P50	30902_MFG1_1_BR2_IDA_TOF3_P50.wiff	CIC1	3644059	XP_714330	1		12	8	0.08	31.8		365
MFG1_1 (N-GFP)	MFG1	3643884	XP_714447.2	4737	6279	30902	MFG1_1_BR2_IDA_TOF3_P50	30902_MFG1_1_BR2_IDA_TOF3_P50.wiff	SLP2	3644091	XP_714250	1	XP_714112.1	2	2	0.02	10.3		263
MFG1_1 (N-GFP)	MFG1	3643884	XP_714447.2	4737	6279	30902	MFG1_1_BR2_IDA_TOF3_P50	30902_MFG1_1_BR2_IDA_TOF3_P50.wiff	PES1	3644105	XP_714264	1	XP_714126.1	22	13	0.24	25.9		587
MFG1_1 (N-GFP)	MFG1	3643884	XP_714447.2	4737	6279	30902	MFG1_1_BR2_IDA_TOF3_P50	30902_MFG1_1_BR2_IDA_TOF3_P50.wiff	PMT4	3644096	XP_714280	1	XP_714142.1	3	2	0.03	3.4		755
MFG1_1 (N-GFP)	MFG1	3643884	XP_714447.2	4737	6279	30902	MFG1_1_BR2_IDA_TOF3_P50	30902_MFG1_1_BR2_IDA_TOF3_P50.wiff	SKP1	3644272	XP_714072	1	XP_713872.1	3	2	0.03	15.2		164
MFG1_1 (N-GFP)	MFG1	3643884	XP_714447.2	4737	6279	30902	MFG1_1_BR2_IDA_TOF3_P50	30902_MFG1_1_BR2_IDA_TOF3_P50.wiff	RPL8A	3644365	XP_713974	1	XP_713916.1	61	16	0.39	56.1		262
MFG1_1 (N-GFP)	MFG1	3643884	XP_714447.2	4737	6279	30902	MFG1_1_BR2_IDA_TOF3_P50	30902_MFG1_1_BR2_IDA_TOF3_P50.wiff	CaO19.9855	3644340	XP_713982	1	XP_713924.1	10	8	0.1	14.7		672
MFG1_1 (N-GFP)	MFG1	3643884	XP_714447.2	4737	6279	30902	MFG1_1_BR2_IDA_TOF3_P50	30902_MFG1_1_BR2_IDA_TOF3_P50.wiff	UTP6	3644384	XP_713993	1	XP_713935.1	3	3	0.04	8.6		431
MFG1_1 (N-GFP)	MFG1	3643884	XP_714447.2	4737	6279	30902	MFG1_1_BR2_IDA_TOF3_P50	30902_MFG1_1_BR2_IDA_TOF3_P50.wiff	CDC48	3644394	XP_714003	1	XP_713945.1	6	6	0.07	11.3		826
MFG1_1 (N-GFP)	MFG1	3643884	XP_714447.2	4737	6279	30902	MFG1_1_BR2_IDA_TOF3_P50	30902_MFG1_1_BR2_IDA_TOF3_P50.wiff	KRR1	3644522	XP_713834	1	XP_713795.1	9	5	0.08	15.6		358
MFG1_1 (N-GFP)	MFG1	3643884	XP_714447.2	4737	6279	30902	MFG1_1_BR2_IDA_TOF3_P50	30902_MFG1_1_BR2_IDA_TOF3_P50.wiff	GGC1	3644497	XP_713859	1	XP_713818.1	4	4	0.05	21.1		304
MFG1_1 (N-GFP)	MFG1	3643884	XP_714447.2	4737	6279	30902	MFG1_1_BR2_IDA_TOF3_P50	30902_MFG1_1_BR2_IDA_TOF3_P50.wiff	GPD2	3644517	XP_713866	1	XP_713824.1	6	5	0.06	15.1		371
MFG1_1 (N-GFP)	MFG1	3643884	XP_714447.2	4737	6279	30902	MFG1_1_BR2_IDA_TOF3_P50	30902_MFG1_1_BR2_IDA_TOF3_P50.wiff	2018-09-07	3644596	XP_713774	1	XP_713740.1	2	2	0.02	2.8		670
MFG1_1 (N-GFP)	MFG1	3643884	XP_714447.2	4737	6279	30902	MFG1_1_BR2_IDA_TOF3_P50	30902_MFG1_1_BR2_IDA_TOF3_P50.wiff	CAALFM_C102240WA	3644597	XP_713775	1	XP_713741.1	9	8	0.1	13.5		875
MFG1_1 (N-GFP)	MFG1	3643884	XP_714447.2	4737	6279	30902	MFG1_1_BR2_IDA_TOF3_P50	30902_MFG1_1_BR2_IDA_TOF3_P50.wiff	FPR3	3644646	XP_713680	1	XP_713635.1	21	9	0.26	23.9		428
MFG1_1 (N-GFP)	MFG1	3643884	XP_714447.2	4737	6279	30902	MFG1_1_BR2_IDA_TOF3_P50	30902_MFG1_1_BR2_IDA_TOF3_P50.wiff	POR1	3644667	XP_713692	1	XP_713647.1	15	11	0.18	50.7		282
MFG1_1 (N-GFP)	MFG1	3643884	XP_714447.2	4737	6279	30902	MFG1_1_BR2_IDA_TOF3_P50	30902_MFG1_1_BR2_IDA_TOF3_P50.wiff	CaO19.8649	3644671	XP_713696	1	XP_713651.1	23	15	0.28	23.7		849
MFG1_1 (N-GFP)	MFG1	3643884	XP_714447.2	4737	6279	30902	MFG1_1_BR2_IDA_TOF3_P50	30902_MFG1_1_BR2_IDA_TOF3_P50.wiff	HTA2	3644634	XP_713700	1	XP_713655.1	23	4	0.15	36.6		131
MFG1_1 (N-GFP)	MFG1	3643884	XP_714447.2	4737	6279	30902	MFG1_1_BR2_IDA_TOF3_P50	30902_MFG1_1_BR2_IDA_TOF3_P50.wiff	HTB2	3644635	XP_713701	1	XP_713656.1; XP_712726.1; XP_712689.1	45	5	0.55	39.2		130
MFG1_1 (N-GFP)	MFG1	3643884	XP_714447.2	4737	6279	30902	MFG1_1_BR2_IDA_TOF3_P50	30902_MFG1_1_BR2_IDA_TOF3_P50.wiff	HHF1	3644647	XP_713708	1	XP_713663.1; XP_711083.1; XP_711039.1	27	5	0.34	49.5		105
MFG1_1 (N-GFP)	MFG1	3643884	XP_714447.2	4737	6279	30902	MFG1_1_BR2_IDA_TOF3_P50	30902_MFG1_1_BR2_IDA_TOF3_P50.wiff	SSA2	3644653	XP_713714	1	XP_713669.1	86	27	0.77	47.9		645
MFG1_1 (N-GFP)	MFG1	3643884	XP_714447.2	4737	6279	30902	MFG1_1_BR2_IDA_TOF3_P50	30902_MFG1_1_BR2_IDA_TOF3_P50.wiff	SEC21	3644738	XP_713604	1	XP_713569.1	13	11	0.16	14.4		936
MFG1_1 (N-GFP)	MFG1	3643884	XP_714447.2	4737	6279	30902	MFG1_1_BR2_IDA_TOF3_P50	30902_MFG1_1_BR2_IDA_TOF3_P50.wiff	CBC2	3644742	XP_713608	1	XP_713573.1	8	6	0.09	33.9		224
MFG1_1 (N-GFP)	MFG1	3643884	XP_714447.2	4737	6279	30902	MFG1_1_BR2_IDA_TOF3_P50	30902_MFG1_1_BR2_IDA_TOF3_P50.wiff	CaO19.8395	3644754	XP_713620	1	XP_713583.1	8	5	0.09	33.3		195
MFG1_1 (N-GFP)	MFG1	3643884	XP_714447.2	4737	6279	30902	MFG1_1_BR2_IDA_TOF3_P50	30902_MFG1_1_BR2_IDA_TOF3_P50.wiff	CaO19.11370	3644832	XP_713555	1	XP_713514.1; XP_711150.1; XP_711132.1	2	2	0.02	9.5		200
MFG1_1 (N-GFP)	MFG1	3643884	XP_714447.2	4737	6279	30902	MFG1_1_BR2_IDA_TOF3_P50	30902_MFG1_1_BR2_IDA_TOF3_P50.wiff	CaO19.11208	3644899	XP_713449	1	XP_713413.1	2	2	0.02	8.2		269
MFG1_1 (N-GFP)	MFG1	3643884	XP_714447.2	4737	6279	30902	MFG1_1_BR2_IDA_TOF3_P50	30902_MFG1_1_BR2_IDA_TOF3_P50.wiff	SUB2	3644966	XP_713375	1	XP_713328.1	6	5	0.07	20.3		290
MFG1_1 (N-GFP)	MFG1	3643884	XP_714447.2	4737	6279	30902	MFG1_1_BR2_IDA_TOF3_P50	30902_MFG1_1_BR2_IDA_TOF3_P50.wiff	ATP2	3644972	XP_713381	1	XP_713334.1	21	12	0.26	36.9		512
MFG1_1 (N-GFP)	MFG1	3643884	XP_714447.2	4737	6279	30902	MFG1_1_BR2_IDA_TOF3_P50	30902_MFG1_1_BR2_IDA_TOF3_P50.wiff	CaO19.13116	3644963	XP_713399	1	XP_713352.1	7	6	0.08	14.8		811
MFG1_1 (N-GFP)	MFG1	3643884	XP_714447.2	4737	6279	30902	MFG1_1_BR2_IDA_TOF3_P50	30902_MFG1_1_BR2_IDA_TOF3_P50.wiff	RCL1	3645157	XP_713189	1	XP_713143.1	3	3	0.04	9.2		371
MFG1_1 (N-GFP)	MFG1	3643884	XP_714447.2	4737	6279	30902	MFG1_1_BR2_IDA_TOF3_P50	30902_MFG1_1_BR2_IDA_TOF3_P50.wiff	CaO19.9452	3645186	XP_713199	1	XP_713153.1	19	15	0.23	28.4		648
MFG1_1 (N-GFP)	MFG1	3643884	XP_714447.2	4737	6279	30902	MFG1_1_BR2_IDA_TOF3_P50	30902_MFG1_1_BR2_IDA_TOF3_P50.wiff	CaO19.9458	3645164	XP_713205	1	XP_713159.1	19	6	0.11	13.5		562
MFG1_1 (N-GFP)	MFG1	3643884	XP_714447.2	4737	6279	30902	MFG1_1_BR2_IDA_TOF3_P50	30902_MFG1_1_BR2_IDA_TOF3_P50.wiff	HSP60	3645238	XP_713100	1	XP_713077.1	4	4	0.05	9.5		566
MFG1_1 (N-GFP)	MFG1	3643884	XP_714447.2	4737	6279	30902	MFG1_1_BR2_IDA_TOF3_P50	30902_MFG1_1_BR2_IDA_TOF3_P50.wiff	RGD2	3645250	XP_713112	1	XP_713089.1; XP_710399.1; XP_710391.1	2	2	0.02	2.3		879
MFG1_1 (N-GFP)	MFG1	3643884	XP_714447.2	4737	6279	30902	MFG1_1_BR2_IDA_TOF3_P50	30902_MFG1_1_BR2_IDA_TOF3_P50.wiff	SVL3	3645295	XP_713042	1	XP_713008.1	9	7	0.11	10		976
MFG1_1 (N-GFP)	MFG1	3643884	XP_714447.2	4737	6279	30902	MFG1_1_BR2_IDA_TOF3_P50	30902_MFG1_1_BR2_IDA_TOF3_P50.wiff	GAR1	3645298	XP_713063	1	XP_713031.1	22	3	0.27	22.6		196
MFG1_1 (N-GFP)	MFG1	3643884	XP_714447.2	4737	6279	30902	MFG1_1_BR2_IDA_TOF3_P50	30902_MFG1_1_BR2_IDA_TOF3_P50.wiff	RPN6	3645352	XP_709940	1	XP_712979.1	5	4	0.05	15.2		435
MFG1_1 (N-GFP)	MFG1	3643884	XP_714447.2	4737	6279	30902	MFG1_1_BR2_IDA_TOF3_P50	30902_MFG1_1_BR2_IDA_TOF3_P50.wiff	RPL17B	3645439	XP_712916	1	XP_712884.1	8	5	0.1	38.9		185
MFG1_1 (N-GFP)	MFG1	3643884	XP_714447.2	4737	6279	30902	MFG1_1_BR2_IDA_TOF3_P50	30902_MFG1_1_BR2_IDA_TOF3_P50.wiff	CAALFM_C204570WA	3645441	XP_712918	1	XP_712886.1	13	10	0.16	21.8		426
MFG1_1 (N-GFP)	MFG1	3643884	XP_714447.2	4737	6279	30902	MFG1_1_BR2_IDA_TOF3_P50	30902_MFG1_1_BR2_IDA_TOF3_P50.wiff	CAALFM_C204370WA	3645460	XP_712942	1	XP_712909.1	10	10	0.12	30.7		410
MFG1_1 (N-GFP)	MFG1	3643884	XP_714447.2	4737	6279	30902	MFG1_1_BR2_IDA_TOF3_P50	30902_MFG1_1_BR2_IDA_TOF3_P50.wiff	RPS8	3645532	XP_712831	1	XP_712803.1	15	7	0.17	43.2		206
MFG1_1 (N-GFP)	MFG1	3643884	XP_714447.2	4737	6279	30902	MFG1_1_BR2_IDA_TOF3_P50	30902_MFG1_1_BR2_IDA_TOF3_P50.wiff	CaO19.14166	3645536	XP_712835	1	XP_712806.1	12	10	0.15	13.1		983
MFG1_1 (N-GFP)	MFG1	3643884	XP_714447.2	4737	6279	30902	MFG1_1_BR2_IDA_TOF3_P50	30902_MFG1_1_BR2_IDA_TOF3_P50.wiff	RFC1	3645550	XP_712849	1	XP_712820.1	10	10	0.11	16		688
MFG1_1 (N-GFP)	MFG1	3643884	XP_714447.2	4737	6279	30902	MFG1_1_BR2_IDA_TOF3_P50	30902_MFG1_1_BR2_IDA_TOF3_P50.wiff	NMD5	3645590	XP_712793	1	XP_712642.1	2	2	0.02	2.5		1017
MFG1_1 (N-GFP)	MFG1	3643884	XP_714447.2	4737	6279	30902	MFG1_1_BR2_IDA_TOF3_P50	30902_MFG1_1_BR2_IDA_TOF3_P50.wiff	CaO19.9898	3645699	XP_712672	1	XP_712652.1	2	2	0.02	5.3		281
MFG1_1 (N-GFP)	MFG1	3643884	XP_714447.2	4737	6279	30902	MFG1_1_BR2_IDA_TOF3_P50	30902_MFG1_1_BR2_IDA_TOF3_P50.wiff	SAR1	3645840	XP_712532	1	XP_712502.1	11	7	0.14	58.6		152
MFG1_1 (N-GFP)	MFG1	3643884	XP_714447.2	4737	6279	30902	MFG1_1_BR2_IDA_TOF3_P50	30902_MFG1_1_BR2_IDA_TOF3_P50.wiff	LSG1	3645841	XP_712533	1	XP_712503.1	2	2	0.02	3.5		684
MFG1_1 (N-GFP)	MFG1	3643884	XP_714447.2	4737	6279	30902	MFG1_1_BR2_IDA_TOF3_P50	30902_MFG1_1_BR2_IDA_TOF3_P50.wiff	RPL1	3645843	XP_712535	1	XP_712505.1	23	10	0.27	41.5		217
MFG1_1 (N-GFP)	MFG1	3643884	XP_714447.2	4737	6279	30902	MFG1_1_BR2_IDA_TOF3_P50	30902_MFG1_1_BR2_IDA_TOF3_P50.wiff	SEC27	3645845	XP_712537	1	XP_712507.1	22	21	0.27	28		939
MFG1_1 (N-GFP)	MFG1	3643884	XP_714447.2	4737	6279	30902	MFG1_1_BR2_IDA_TOF3_P50	30902_MFG1_1_BR2_IDA_TOF3_P50.wiff	HRR25	3645853	XP_712545	1	XP_712515.1	2	2	0.02	4.6		433
MFG1_1 (N-GFP)	MFG1	3643884	XP_714447.2	4737	6279	30902	MFG1_1_BR2_IDA_TOF3_P50	30902_MFG1_1_BR2_IDA_TOF3_P50.wiff	NIP7	3645855	XP_712547	1	XP_712517.1	4	4	0.05	19.1		262
MFG1_1 (N-GFP)	MFG1	3643884	XP_714447.2	4737	6279	30902	MFG1_1_BR2_IDA_TOF3_P50	30902_MFG1_1_BR2_IDA_TOF3_P50.wiff	RSM23	3645857	XP_712549	1	XP_712519.1	4	3	0.04	12.6		483
MFG1_1 (N-GFP)	MFG1	3643884	XP_714447.2	4737	6279	30902	MFG1_1_BR2_IDA_TOF3_P50	30902_MFG1_1_BR2_IDA_TOF3_P50.wiff	DBP7	3645903	XP_712474	1	XP_888745.1	4	3	0.04	5.6		727
MFG1_1 (N-GFP)	MFG1	3643884	XP_714447.2	4737	6279	30902	MFG1_1_BR2_IDA_TOF3_P50	30902_MFG1_1_BR2_IDA_TOF3_P50.wiff	ASC1	3645907	XP_712478	1	XP_888749.1	4	4	0.05	31.8		211
MFG1_1 (N-GFP)	MFG1	3643884	XP_714447.2	4737	6279	30902	MFG1_1_BR2_IDA_TOF3_P50	30902_MFG1_1_BR2_IDA_TOF3_P50.wiff	NOP58	3645922	XP_712460	1		345	23	2.14	57.7		515
MFG1_1 (N-GFP)	MFG1	3643884	XP_714447.2	4737	6279	30902	MFG1_1_BR2_IDA_TOF3_P50	30902_MFG1_1_BR2_IDA_TOF3_P50.wiff	LPD1	3645998	XP_712370	1	XP_712334.1	6	5	0.07	13.4		491
MFG1_1 (N-GFP)	MFG1	3643884	XP_714447.2	4737	6279	30902	MFG1_1_BR2_IDA_TOF3_P50	30902_MFG1_1_BR2_IDA_TOF3_P50.wiff	MRPL4	3646015	XP_712379	1	XP_712343.1	2	2	0.02	9.4		309
MFG1_1 (N-GFP)	MFG1	3643884	XP_714447.2	4737	6279	30902	MFG1_1_BR2_IDA_TOF3_P50	30902_MFG1_1_BR2_IDA_TOF3_P50.wiff	NOP5	3646084	XP_712316	1		344	23	2.1	57.6		516
MFG1_1 (N-GFP)	MFG1	3643884	XP_714447.2	4737	6279	30902	MFG1_1_BR2_IDA_TOF3_P50	30902_MFG1_1_BR2_IDA_TOF3_P50.wiff	VMA2	3646206	XP_712174	1	XP_711700.1	26	17	0.32	45.5		512
MFG1_1 (N-GFP)	MFG1	3643884	XP_714447.2	4737	6279	30902	MFG1_1_BR2_IDA_TOF3_P50	30902_MFG1_1_BR2_IDA_TOF3_P50.wiff	HMO1	3646217	XP_712185	1	XP_711711.1	12	8	0.14	43.9		223
MFG1_1 (N-GFP)	MFG1	3643884	XP_714447.2	4737	6279	30902	MFG1_1_BR2_IDA_TOF3_P50	30902_MFG1_1_BR2_IDA_TOF3_P50.wiff	CaO19.13969	3646220	XP_712188	1	XP_711714.1	5	5	0.06	10.9		759
MFG1_1 (N-GFP)	MFG1	3643884	XP_714447.2	4737	6279	30902	MFG1_1_BR2_IDA_TOF3_P50	30902_MFG1_1_BR2_IDA_TOF3_P50.wiff	DBP8	3646191	XP_712192	1	XP_711718.1	13	5	0.08	17.5		440
MFG1_1 (N-GFP)	MFG1	3643884	XP_714447.2	4737	6279	30902	MFG1_1_BR2_IDA_TOF3_P50	30902_MFG1_1_BR2_IDA_TOF3_P50.wiff	CAALFM_C703660CA	3646226	XP_712153	1	XP_712128.1; XP_888972.1	3	2	0.03	5.1		691
MFG1_1 (N-GFP)	MFG1	3643884	XP_714447.2	4737	6279	30902	MFG1_1_BR2_IDA_TOF3_P50	30902_MFG1_1_BR2_IDA_TOF3_P50.wiff	DED81	3646227	XP_712154	1	XP_712129.1; XP_888973.1	4	3	0.04	10.1		552
MFG1_1 (N-GFP)	MFG1	3643884	XP_714447.2	4737	6279	30902	MFG1_1_BR2_IDA_TOF3_P50	30902_MFG1_1_BR2_IDA_TOF3_P50.wiff	CAALFM_C703480WA	3646230	XP_712157	1	XP_712132.1; XP_888955.1	12	10	0.15	11.5		1045
MFG1_1 (N-GFP)	MFG1	3643884	XP_714447.2	4737	6279	30902	MFG1_1_BR2_IDA_TOF3_P50	30902_MFG1_1_BR2_IDA_TOF3_P50.wiff	CDC39	3646278	XP_712097	1	XP_712072.1	5	5	0.05	3.3		2016
MFG1_1 (N-GFP)	MFG1	3643884	XP_714447.2	4737	6279	30902	MFG1_1_BR2_IDA_TOF3_P50	30902_MFG1_1_BR2_IDA_TOF3_P50.wiff	NOP8	3646290	XP_712104	1	XP_712079.1	14	11	0.17	16.7		690
MFG1_1 (N-GFP)	MFG1	3643884	XP_714447.2	4737	6279	30902	MFG1_1_BR2_IDA_TOF3_P50	30902_MFG1_1_BR2_IDA_TOF3_P50.wiff	FLO8	3646292	XP_712106	1	XP_712082.1	61	16	0.73	23		817
MFG1_1 (N-GFP)	MFG1	3643884	XP_714447.2	4737	6279	30902	MFG1_1_BR2_IDA_TOF3_P50	30902_MFG1_1_BR2_IDA_TOF3_P50.wiff	RPO26	3646330	XP_712047	1	XP_712026.1	2	2	0.02	17.2		157
MFG1_1 (N-GFP)	MFG1	3643884	XP_714447.2	4737	6279	30902	MFG1_1_BR2_IDA_TOF3_P50	30902_MFG1_1_BR2_IDA_TOF3_P50.wiff	QCR2	3646331	XP_712048	1	XP_712027.1	5	5	0.05	20.3		374
MFG1_1 (N-GFP)	MFG1	3643884	XP_714447.2	4737	6279	30902	MFG1_1_BR2_IDA_TOF3_P50	30902_MFG1_1_BR2_IDA_TOF3_P50.wiff	CAM1	3646337	XP_712054	1	XP_712033.1	21	12	0.24	34.8		419
MFG1_1 (N-GFP)	MFG1	3643884	XP_714447.2	4737	6279	30902	MFG1_1_BR2_IDA_TOF3_P50	30902_MFG1_1_BR2_IDA_TOF3_P50.wiff	CAALFM_C104040CA	3646429	XP_711973	1	XP_711948.1	3	3	0.04	7.6		525
MFG1_1 (N-GFP)	MFG1	3643884	XP_714447.2	4737	6279	30902	MFG1_1_BR2_IDA_TOF3_P50	30902_MFG1_1_BR2_IDA_TOF3_P50.wiff	GCR3	3646476	XP_711904	1	XP_711875.1	12	11	0.13	18.2		886
MFG1_1 (N-GFP)	MFG1	3643884	XP_714447.2	4737	6279	30902	MFG1_1_BR2_IDA_TOF3_P50	30902_MFG1_1_BR2_IDA_TOF3_P50.wiff	ENO1	3646484	XP_711912	1	XP_711883.1	65	16	0.8	55		440
MFG1_1 (N-GFP)	MFG1	3643884	XP_714447.2	4737	6279	30902	MFG1_1_BR2_IDA_TOF3_P50	30902_MFG1_1_BR2_IDA_TOF3_P50.wiff	YPK2	3646471	XP_711916	1	XP_711887.1	3	3	0.04	5.6		712
MFG1_1 (N-GFP)	MFG1	3643884	XP_714447.2	4737	6279	30902	MFG1_1_BR2_IDA_TOF3_P50	30902_MFG1_1_BR2_IDA_TOF3_P50.wiff	CaO19.8030	3646472	XP_711917	1	XP_711888.1	8	6	0.1	26.1		245
MFG1_1 (N-GFP)	MFG1	3643884	XP_714447.2	4737	6279	30902	MFG1_1_BR2_IDA_TOF3_P50	30902_MFG1_1_BR2_IDA_TOF3_P50.wiff	TCP1	3646473	XP_711918	1	XP_711889.1	4	4	0.05	9.4		554
MFG1_1 (N-GFP)	MFG1	3643884	XP_714447.2	4737	6279	30902	MFG1_1_BR2_IDA_TOF3_P50	30902_MFG1_1_BR2_IDA_TOF3_P50.wiff	GCD6	3646459	XP_711924	1	XP_711895.1	13	7	0.15	16		732
MFG1_1 (N-GFP)	MFG1	3643884	XP_714447.2	4737	6279	30902	MFG1_1_BR2_IDA_TOF3_P50	30902_MFG1_1_BR2_IDA_TOF3_P50.wiff	SPF1	3646573	XP_711837	1	XP_711815.1	2	2	0.02	2.4		1223
MFG1_1 (N-GFP)	MFG1	3643884	XP_714447.2	4737	6279	30902	MFG1_1_BR2_IDA_TOF3_P50	30902_MFG1_1_BR2_IDA_TOF3_P50.wiff	CaO19.8316	3646600	XP_711788	1	XP_711770.1	5	5	0.06	11		447
MFG1_1 (N-GFP)	MFG1	3643884	XP_714447.2	4737	6279	30902	MFG1_1_BR2_IDA_TOF3_P50	30902_MFG1_1_BR2_IDA_TOF3_P50.wiff	ECM32	3646609	XP_711793	1	XP_711775.1	3	3	0.04	3.2		1105
MFG1_1 (N-GFP)	MFG1	3643884	XP_714447.2	4737	6279	30902	MFG1_1_BR2_IDA_TOF3_P50	30902_MFG1_1_BR2_IDA_TOF3_P50.wiff	LSC2	3646604	XP_711801	1	XP_711783.1	4	3	0.05	28.3		120
MFG1_1 (N-GFP)	MFG1	3643884	XP_714447.2	4737	6279	30902	MFG1_1_BR2_IDA_TOF3_P50	30902_MFG1_1_BR2_IDA_TOF3_P50.wiff	CaO19.10294	3646651	XP_711742	1	XP_711720.1	18	16	0.22	26.3		665
MFG1_1 (N-GFP)	MFG1	3643884	XP_714447.2	4737	6279	30902	MFG1_1_BR2_IDA_TOF3_P50	30902_MFG1_1_BR2_IDA_TOF3_P50.wiff	RPG1	3646756	XP_711631	1		28	22	0.17	29.1		930
MFG1_1 (N-GFP)	MFG1	3643884	XP_714447.2	4737	6279	30902	MFG1_1_BR2_IDA_TOF3_P50	30902_MFG1_1_BR2_IDA_TOF3_P50.wiff	RPG1A	3646816	XP_711563	1		27	22	0.16	29.1		930
MFG1_1 (N-GFP)	MFG1	3643884	XP_714447.2	4737	6279	30902	MFG1_1_BR2_IDA_TOF3_P50	30902_MFG1_1_BR2_IDA_TOF3_P50.wiff	GSP1	3646894	XP_711509	1	XP_711485.1	3	3	0.04	13.6		214
MFG1_1 (N-GFP)	MFG1	3643884	XP_714447.2	4737	6279	30902	MFG1_1_BR2_IDA_TOF3_P50	30902_MFG1_1_BR2_IDA_TOF3_P50.wiff	MAK16	3646900	XP_711515	1	XP_711491.1	3	3	0.04	11.4		315
MFG1_1 (N-GFP)	MFG1	3643884	XP_714447.2	4737	6279	30902	MFG1_1_BR2_IDA_TOF3_P50	30902_MFG1_1_BR2_IDA_TOF3_P50.wiff	RPS25B	3646972	XP_711416	1		7	3	0.08	32.4		105
MFG1_1 (N-GFP)	MFG1	3643884	XP_714447.2	4737	6279	30902	MFG1_1_BR2_IDA_TOF3_P50	30902_MFG1_1_BR2_IDA_TOF3_P50.wiff	MDJ1	3646980	XP_711424	1		4	4	0.05	10.2		488
MFG1_1 (N-GFP)	MFG1	3643884	XP_714447.2	4737	6279	30902	MFG1_1_BR2_IDA_TOF3_P50	30902_MFG1_1_BR2_IDA_TOF3_P50.wiff	CEF3	3647006	XP_711404	1		38	19	0.21	25.1		1050
MFG1_1 (N-GFP)	MFG1	3643884	XP_714447.2	4737	6279	30902	MFG1_1_BR2_IDA_TOF3_P50	30902_MFG1_1_BR2_IDA_TOF3_P50.wiff	PGK1	3647038	XP_711371	1	XP_711323.1	12	9	0.15	30.5		417
MFG1_1 (N-GFP)	MFG1	3643884	XP_714447.2	4737	6279	30902	MFG1_1_BR2_IDA_TOF3_P50	30902_MFG1_1_BR2_IDA_TOF3_P50.wiff	CEF3	3647040	XP_711356	1		39	19	0.22	25.1		1050
MFG1_1 (N-GFP)	MFG1	3643884	XP_714447.2	4737	6279	30902	MFG1_1_BR2_IDA_TOF3_P50	30902_MFG1_1_BR2_IDA_TOF3_P50.wiff	SSF1	3647085	XP_711291	1		3	3	0.04	10.1		377
MFG1_1 (N-GFP)	MFG1	3643884	XP_714447.2	4737	6279	30902	MFG1_1_BR2_IDA_TOF3_P50	30902_MFG1_1_BR2_IDA_TOF3_P50.wiff	RPS3	3647287	XP_711114	1	XP_711097.1	31	11	0.35	46.2		251
MFG1_1 (N-GFP)	MFG1	3643884	XP_714447.2	4737	6279	30902	MFG1_1_BR2_IDA_TOF3_P50	30902_MFG1_1_BR2_IDA_TOF3_P50.wiff	MSS11	3647296	XP_711094	1		25	9	0.16	30		637
MFG1_1 (N-GFP)	MFG1	3643884	XP_714447.2	4737	6279	30902	MFG1_1_BR2_IDA_TOF3_P50	30902_MFG1_1_BR2_IDA_TOF3_P50.wiff	SEC61	3647462	XP_710932	1		3	2	0.03	6.3		479
MFG1_1 (N-GFP)	MFG1	3643884	XP_714447.2	4737	6279	30902	MFG1_1_BR2_IDA_TOF3_P50	30902_MFG1_1_BR2_IDA_TOF3_P50.wiff	SRB1	3647454	XP_710946	1		41	16	0.5	51.9		362
MFG1_1 (N-GFP)	MFG1	3643884	XP_714447.2	4737	6279	30902	MFG1_1_BR2_IDA_TOF3_P50	30902_MFG1_1_BR2_IDA_TOF3_P50.wiff	CAALFM_C104970WA	3647528	XP_710862	1	XP_710850.1	15	14	0.18	11.7		1363
MFG1_1 (N-GFP)	MFG1	3643884	XP_714447.2	4737	6279	30902	MFG1_1_BR2_IDA_TOF3_P50	30902_MFG1_1_BR2_IDA_TOF3_P50.wiff	RRP6	3647535	XP_710869	1	XP_710857.1	2	2	0.02	3.3		786
MFG1_1 (N-GFP)	MFG1	3643884	XP_714447.2	4737	6279	30902	MFG1_1_BR2_IDA_TOF3_P50	30902_MFG1_1_BR2_IDA_TOF3_P50.wiff	CHC1	3647552	XP_710836	1	XP_710822.1	15	14	0.18	10.4		1671
MFG1_1 (N-GFP)	MFG1	3643884	XP_714447.2	4737	6279	30902	MFG1_1_BR2_IDA_TOF3_P50	30902_MFG1_1_BR2_IDA_TOF3_P50.wiff	RPL23A	3647558	XP_710842	1	XP_710828.1	14	3	0.15	28.7		115
MFG1_1 (N-GFP)	MFG1	3643884	XP_714447.2	4737	6279	30902	MFG1_1_BR2_IDA_TOF3_P50	30902_MFG1_1_BR2_IDA_TOF3_P50.wiff	CaO19.13272	3647585	XP_710816	1	XP_710805.1	12	9	0.15	13.7		714
MFG1_1 (N-GFP)	MFG1	3643884	XP_714447.2	4737	6279	30902	MFG1_1_BR2_IDA_TOF3_P50	30902_MFG1_1_BR2_IDA_TOF3_P50.wiff	TOM71	3647631	XP_710768	1	XP_710749.1; XP_888879.1	7	7	0.09	14.1		629
MFG1_1 (N-GFP)	MFG1	3643884	XP_714447.2	4737	6279	30902	MFG1_1_BR2_IDA_TOF3_P50	30902_MFG1_1_BR2_IDA_TOF3_P50.wiff	CBF5	3647637	XP_710755	1	XP_710717.1	163	21	1.94	53.4		479
MFG1_1 (N-GFP)	MFG1	3643884	XP_714447.2	4737	6279	30902	MFG1_1_BR2_IDA_TOF3_P50	30902_MFG1_1_BR2_IDA_TOF3_P50.wiff	CaO19.170	3647691	XP_710707	1	XP_710693.1	13	3	0.16	38.9		112
MFG1_1 (N-GFP)	MFG1	3643884	XP_714447.2	4737	6279	30902	MFG1_1_BR2_IDA_TOF3_P50	30902_MFG1_1_BR2_IDA_TOF3_P50.wiff	DBP2	3647692	XP_710708	1	XP_710694.1	92	21	0.96	42.4		443
MFG1_1 (N-GFP)	MFG1	3643884	XP_714447.2	4737	6279	30902	MFG1_1_BR2_IDA_TOF3_P50	30902_MFG1_1_BR2_IDA_TOF3_P50.wiff	RPL3	3647719	XP_710682	1	XP_710673.1	36	14	0.42	32.6		389
MFG1_1 (N-GFP)	MFG1	3643884	XP_714447.2	4737	6279	30902	MFG1_1_BR2_IDA_TOF3_P50	30902_MFG1_1_BR2_IDA_TOF3_P50.wiff	PET56	3647763	XP_710624	1	XP_710610.1	2	2	0.02	8.8		396
MFG1_1 (N-GFP)	MFG1	3643884	XP_714447.2	4737	6279	30902	MFG1_1_BR2_IDA_TOF3_P50	30902_MFG1_1_BR2_IDA_TOF3_P50.wiff	CAALFM_C500150CA	3647872	XP_710511	1		15	6	0.17	18.8		543
MFG1_1 (N-GFP)	MFG1	3643884	XP_714447.2	4737	6279	30902	MFG1_1_BR2_IDA_TOF3_P50	30902_MFG1_1_BR2_IDA_TOF3_P50.wiff	THS1	3647882	XP_710514	1		4	4	0.04	7.6		706
MFG1_1 (N-GFP)	MFG1	3643884	XP_714447.2	4737	6279	30902	MFG1_1_BR2_IDA_TOF3_P50	30902_MFG1_1_BR2_IDA_TOF3_P50.wiff	CAALFM_C500080CA	3647886	XP_710518	1		3	3	0.04	12.2		311
MFG1_1 (N-GFP)	MFG1	3643884	XP_714447.2	4737	6279	30902	MFG1_1_BR2_IDA_TOF3_P50	30902_MFG1_1_BR2_IDA_TOF3_P50.wiff	CAALFM_C500030WA	3647879	XP_710527	1		3	3	0.04	13.4		269
MFG1_1 (N-GFP)	MFG1	3643884	XP_714447.2	4737	6279	30902	MFG1_1_BR2_IDA_TOF3_P50	30902_MFG1_1_BR2_IDA_TOF3_P50.wiff	VID27	3647894	XP_710495	1		4	4	0.04	6.3		745
MFG1_1 (N-GFP)	MFG1	3643884	XP_714447.2	4737	6279	30902	MFG1_1_BR2_IDA_TOF3_P50	30902_MFG1_1_BR2_IDA_TOF3_P50.wiff	HET1	3647897	XP_710498	1		2	2	0.02	17.8		197
MFG1_1 (N-GFP)	MFG1	3643884	XP_714447.2	4737	6279	30902	MFG1_1_BR2_IDA_TOF3_P50	30902_MFG1_1_BR2_IDA_TOF3_P50.wiff	MPP10	3647912	XP_710480	1	XP_710461.1	3	3	0.04	6.8		567
MFG1_1 (N-GFP)	MFG1	3643884	XP_714447.2	4737	6279	30902	MFG1_1_BR2_IDA_TOF3_P50	30902_MFG1_1_BR2_IDA_TOF3_P50.wiff	UTP20	3647953	XP_710448	1	XP_710441.1	5	4	0.05	5.6		1197
MFG1_1 (N-GFP)	MFG1	3643884	XP_714447.2	4737	6279	30902	MFG1_1_BR2_IDA_TOF3_P50	30902_MFG1_1_BR2_IDA_TOF3_P50.wiff	STT4	3647963	XP_710433	1	XP_710429.1	4	4	0.04	2.6		1927
MFG1_1 (N-GFP)	MFG1	3643884	XP_714447.2	4737	6279	30902	MFG1_1_BR2_IDA_TOF3_P50	30902_MFG1_1_BR2_IDA_TOF3_P50.wiff	CAALFM_CR07080WA	3647964	XP_710434	1	XP_710430.1	4	3	0.05	22		245
MFG1_1 (N-GFP)	MFG1	3643884	XP_714447.2	4737	6279	30902	MFG1_1_BR2_IDA_TOF3_P50	30902_MFG1_1_BR2_IDA_TOF3_P50.wiff	NOP4	3647980	XP_710417	1	XP_710406.1	11	9	0.12	13.1		741
MFG1_1 (N-GFP)	MFG1	3643884	XP_714447.2	4737	6279	30902	MFG1_1_BR2_IDA_TOF3_P50	30902_MFG1_1_BR2_IDA_TOF3_P50.wiff	SLB2	3648018	XP_710381	1	XP_710374.1	7	6	0.08	24.9		317
MFG1_1 (N-GFP)	MFG1	3643884	XP_714447.2	4737	6279	30902	MFG1_1_BR2_IDA_TOF3_P50	30902_MFG1_1_BR2_IDA_TOF3_P50.wiff	VMA6	3648045	XP_710349	1	XP_710332.1	2	2	0.02	8.3		348
MFG1_1 (N-GFP)	MFG1	3643884	XP_714447.2	4737	6279	30902	MFG1_1_BR2_IDA_TOF3_P50	30902_MFG1_1_BR2_IDA_TOF3_P50.wiff	TRP5	3648087	XP_710312	1		13	13	0.16	25.5		702
MFG1_1 (N-GFP)	MFG1	3643884	XP_714447.2	4737	6279	30902	MFG1_1_BR2_IDA_TOF3_P50	30902_MFG1_1_BR2_IDA_TOF3_P50.wiff	UGP1	3648144	XP_710258	1	XP_710250.1	3	2	0.03	8.3		472
MFG1_1 (N-GFP)	MFG1	3643884	XP_714447.2	4737	6279	30902	MFG1_1_BR2_IDA_TOF3_P50	30902_MFG1_1_BR2_IDA_TOF3_P50.wiff	SPB1	3648174	XP_710229	1	XP_710224.1	6	5	0.07	7.3		853
MFG1_1 (N-GFP)	MFG1	3643884	XP_714447.2	4737	6279	30902	MFG1_1_BR2_IDA_TOF3_P50	30902_MFG1_1_BR2_IDA_TOF3_P50.wiff	VAS1	3648338	XP_710062	1	XP_710060.1	3	3	0.03	4.6		1119
MFG1_1 (N-GFP)	MFG1	3643884	XP_714447.2	4737	6279	30902	MFG1_1_BR2_IDA_TOF3_P50	30902_MFG1_1_BR2_IDA_TOF3_P50.wiff	RRP15	3648397	XP_710002	1		3	3	0.04	12.9		255
MFG1_1 (N-GFP)	MFG1	3643884	XP_714447.2	4737	6279	30902	MFG1_1_BR2_IDA_TOF3_P50	30902_MFG1_1_BR2_IDA_TOF3_P50.wiff	CaO19.37	3648425	XP_709976	1		6	4	0.07	8.4		478
MFG1_1 (N-GFP)	MFG1	3643884	XP_714447.2	4737	6279	30902	MFG1_1_BR2_IDA_TOF3_P50	30902_MFG1_1_BR2_IDA_TOF3_P50.wiff	CaJ7_0366	3704165	XP_888925	1		5	2	0.05	21		105
MFG1_1 (N-GFP)	MFG1	3643884	XP_714447.2	4737	6279	30902	MFG1_1_BR2_IDA_TOF3_P50	30902_MFG1_1_BR2_IDA_TOF3_P50.wiff	C4A	280678	P01030	1		4	4	0.05	3.2		1741
MFG1_1 (N-GFP)	MFG1	3643884	XP_714447.2	4737	6279	30902	MFG1_1_BR2_IDA_TOF3_P50	30902_MFG1_1_BR2_IDA_TOF3_P50.wiff	KNG1	280833	P01044-1	1	Q2KJ62	5	5	0.06	7.9		621
MFG1_1 (N-GFP)	MFG1	3643884	XP_714447.2	4737	6279	30902	MFG1_1_BR2_IDA_TOF3_P50	30902_MFG1_1_BR2_IDA_TOF3_P50.wiff	HBA	512439	P01966	1		12	6	0.15	57		142
MFG1_1 (N-GFP)	MFG1	3643884	XP_714447.2	4737	6279	30902	MFG1_1_BR2_IDA_TOF3_P50	30902_MFG1_1_BR2_IDA_TOF3_P50.wiff	ALB	280717	P02769	1	ALBU_BOVIN	3	3	0.04	5.9	0.4052
MFG1_1 (N-GFP)	MFG1	3643884	XP_714447.2	4737	6279	30902	MFG1_1_BR2_IDA_TOF3_P50	30902_MFG1_1_BR2_IDA_TOF3_P50.wiff	KRT1	3848	P04264	1	K2C1_HUMAN	51	20	0.52	30.9		643
MFG1_1 (N-GFP)	MFG1	3643884	XP_714447.2	4737	6279	30902	MFG1_1_BR2_IDA_TOF3_P50	30902_MFG1_1_BR2_IDA_TOF3_P50.wiff	KRT2	3849	P35908	1	K22E_HUMAN	30	20	0.28	36.6	0.3922	645
MFG1_1 (N-GFP)	MFG1	3643884	XP_714447.2	4737	6279	30902	MFG1_1_BR2_IDA_TOF3_P50	30902_MFG1_1_BR2_IDA_TOF3_P50.wiff	KRT5	3852	P13647	1		11	8	0.07	13.2	0.1111	590
MFG1_1 (N-GFP)	MFG1	3643884	XP_714447.2	4737	6279	30902	MFG1_1_BR2_IDA_TOF3_P50	30902_MFG1_1_BR2_IDA_TOF3_P50.wiff	KRT6A	3853	P02538	0.9981	P04259; P48668	9	6	0.04	10.1	0.0588	564
MFG1_1 (N-GFP)	MFG1	3643884	XP_714447.2	4737	6279	30902	MFG1_1_BR2_IDA_TOF3_P50	30902_MFG1_1_BR2_IDA_TOF3_P50.wiff	KRT10	3858	P13645	1	K1C10_HUMAN	29	17	0.31	36.6		593
MFG1_1 (N-GFP)	MFG1	3643884	XP_714447.2	4737	6279	30902	MFG1_1_BR2_IDA_TOF3_P50	30902_MFG1_1_BR2_IDA_TOF3_P50.wiff	KRT9	3857	P35527	1	K1C9_HUMAN	25	15	0.26	33.5		623
MFG1_1 (N-GFP)	MFG1	3643884	XP_714447.2	4737	6279	30902	MFG1_1_BR2_IDA_TOF3_P50	30902_MFG1_1_BR2_IDA_TOF3_P50.wiff	KRT14	3861	P02533	1		10	6	0.06	16.1	0.2549	472
MFG1_1 (N-GFP)	MFG1	3643884	XP_714447.2	4737	6279	30902	MFG1_1_BR2_IDA_TOF3_P50	30902_MFG1_1_BR2_IDA_TOF3_P50.wiff	KRT19	3880	P08727	0.9633	P19001	7	3	0.04	6.2		400
MFG1_1 (N-GFP)	MFG1	3643884	XP_714447.2	4737	6279	30902	MFG1_1_BR2_IDA_TOF3_P50	30902_MFG1_1_BR2_IDA_TOF3_P50.wiff	C5	512045	Q1A7A4	1		2	2	0.02	1.3		1677
MFG1_1 (N-GFP)	MFG1	3643884	XP_714447.2	4737	6279	30902	MFG1_1_BR2_IDA_TOF3_P50	30902_MFG1_1_BR2_IDA_TOF3_P50.wiff	LOC788610	788610	Q3SX09	1		11	5	0.12	31.8		201
MFG1_1 (N-GFP)	MFG1	3643884	XP_714447.2	4737	6279	30902	MFG1_1_BR2_IDA_TOF3_P50	30902_MFG1_1_BR2_IDA_TOF3_P50.wiff	HBB	280813	P02070	1		5	4	0.04	29.7		145
MFG1_1 (N-GFP)	MFG1	3643884	XP_714447.2	4737	6279	30902	MFG1_1_BR2_IDA_TOF3_P50	30902_MFG1_1_BR2_IDA_TOF3_P50.wiff	GSN	535077	Q3SX14	1		4	4	0.05	6.3		781
MFG1_1 (N-GFP)	MFG1	3643884	XP_714447.2	4737	6279	30902	MFG1_1_BR2_IDA_TOF3_P50	30902_MFG1_1_BR2_IDA_TOF3_P50.wiff	DBP3	3634868	XP_723554	1	XP_723365.1	61	25	0.63	52.8		564
MFG1_1 (N-GFP)	MFG1	3643884	XP_714447.2	4737	6279	30902	MFG1_1_BR2_IDA_TOF3_P50	30902_MFG1_1_BR2_IDA_TOF3_P50.wiff	ARF2	3635271	XP_723175	1	XP_723028.1	7	6	0.08	39.8		181
MFG1_1 (N-GFP)	MFG1	3643884	XP_714447.2	4737	6279	30902	MFG1_1_BR2_IDA_TOF3_P50	30902_MFG1_1_BR2_IDA_TOF3_P50.wiff	BFR1	3635540	XP_722778	1	XP_722633.1	9	7	0.1	18.4		462
MFG1_1 (N-GFP)	MFG1	3643884	XP_714447.2	4737	6279	30902	MFG1_1_BR2_IDA_TOF3_P50	30902_MFG1_1_BR2_IDA_TOF3_P50.wiff	RPL20B	3635615	XP_722704	1		25	10	0.3	51.2		172
MFG1_1 (N-GFP)	MFG1	3643884	XP_714447.2	4737	6279	30902	MFG1_1_BR2_IDA_TOF3_P50	30902_MFG1_1_BR2_IDA_TOF3_P50.wiff	ACT1	3636030	XP_722325	1	XP_722211.1	14	8	0.16	28.1		360
MFG1_1 (N-GFP)	MFG1	3643884	XP_714447.2	4737	6279	30902	MFG1_1_BR2_IDA_TOF3_P50	30902_MFG1_1_BR2_IDA_TOF3_P50.wiff	MYO2	3636089	XP_722333	1	XP_722219.1	34	28	0.4	23.4		1561
MFG1_1 (N-GFP)	MFG1	3643884	XP_714447.2	4737	6279	30902	MFG1_1_BR2_IDA_TOF3_P50	30902_MFG1_1_BR2_IDA_TOF3_P50.wiff	ADH1	3636387	XP_722066	1		17	13	0.2	32.6		435
MFG1_1 (N-GFP)	MFG1	3643884	XP_714447.2	4737	6279	30902	MFG1_1_BR2_IDA_TOF3_P50	30902_MFG1_1_BR2_IDA_TOF3_P50.wiff	CAALFM_C302260CA	3636636	XP_721698	1	XP_721578.1	5	5	0.05	9.9		586
MFG1_1 (N-GFP)	MFG1	3643884	XP_714447.2	4737	6279	30902	MFG1_1_BR2_IDA_TOF3_P50	30902_MFG1_1_BR2_IDA_TOF3_P50.wiff	MNT1	3636585	XP_721742	1	XP_721623.1	6	6	0.07	17.6		431
MFG1_1 (N-GFP)	MFG1	3643884	XP_714447.2	4737	6279	30902	MFG1_1_BR2_IDA_TOF3_P50	30902_MFG1_1_BR2_IDA_TOF3_P50.wiff	GFA1	3636723	XP_721577	1		30	17	0.37	32.5		713
MFG1_1 (N-GFP)	MFG1	3643884	XP_714447.2	4737	6279	30902	MFG1_1_BR2_IDA_TOF3_P50	30902_MFG1_1_BR2_IDA_TOF3_P50.wiff	TFP1	3636703	XP_721638	1		10	9	0.11	19.4		577
MFG1_1 (N-GFP)	MFG1	3643884	XP_714447.2	4737	6279	30902	MFG1_1_BR2_IDA_TOF3_P50	30902_MFG1_1_BR2_IDA_TOF3_P50.wiff	GSC1	3636794	XP_721429	1	XP_721157.1	16	15	0.18	9.6		1897
MFG1_1 (N-GFP)	MFG1	3643884	XP_714447.2	4737	6279	30902	MFG1_1_BR2_IDA_TOF3_P50	30902_MFG1_1_BR2_IDA_TOF3_P50.wiff	HXT61	3638780	XP_719598	1	XP_719472.1	5	3	0.06	8		497
MFG1_1 (N-GFP)	MFG1	3643884	XP_714447.2	4737	6279	30902	MFG1_1_BR2_IDA_TOF3_P50	30902_MFG1_1_BR2_IDA_TOF3_P50.wiff	RFC5	3638785	XP_719603	1		7	6	0.09	22.7		362
MFG1_1 (N-GFP)	MFG1	3643884	XP_714447.2	4737	6279	30902	MFG1_1_BR2_IDA_TOF3_P50	30902_MFG1_1_BR2_IDA_TOF3_P50.wiff	AHA1	3638933	XP_719364	1		11	7	0.14	21.7		346
MFG1_1 (N-GFP)	MFG1	3643884	XP_714447.2	4737	6279	30902	MFG1_1_BR2_IDA_TOF3_P50	30902_MFG1_1_BR2_IDA_TOF3_P50.wiff	SRP72	3639106	XP_719198	1	XP_719081.1	4	4	0.04	7.7		635
MFG1_1 (N-GFP)	MFG1	3643884	XP_714447.2	4737	6279	30902	MFG1_1_BR2_IDA_TOF3_P50	30902_MFG1_1_BR2_IDA_TOF3_P50.wiff	RPS23	3639647	XP_718756	1		7	2	0.09	15.2		145
MFG1_1 (N-GFP)	MFG1	3643884	XP_714447.2	4737	6279	30902	MFG1_1_BR2_IDA_TOF3_P50	30902_MFG1_1_BR2_IDA_TOF3_P50.wiff	SNF4	3640338	XP_718037	1		2	2	0.02	6		336
MFG1_1 (N-GFP)	MFG1	3643884	XP_714447.2	4737	6279	30902	MFG1_1_BR2_IDA_TOF3_P50	30902_MFG1_1_BR2_IDA_TOF3_P50.wiff	FUN12	3640713	XP_717619	1	XP_717545.1	42	24	0.5	29.3		1017
MFG1_1 (N-GFP)	MFG1	3643884	XP_714447.2	4737	6279	30902	MFG1_1_BR2_IDA_TOF3_P50	30902_MFG1_1_BR2_IDA_TOF3_P50.wiff	TEF3	3640757	XP_717655	1	XP_717581.1; XP_711899.1; XP_711870.1	151	17	1.79	41.3		458
MFG1_1 (N-GFP)	MFG1	3643884	XP_714447.2	4737	6279	30902	MFG1_1_BR2_IDA_TOF3_P50	30902_MFG1_1_BR2_IDA_TOF3_P50.wiff	YDJ1	3640883	XP_717458	1		11	8	0.14	21.4		393
MFG1_1 (N-GFP)	MFG1	3643884	XP_714447.2	4737	6279	30902	MFG1_1_BR2_IDA_TOF3_P50	30902_MFG1_1_BR2_IDA_TOF3_P50.wiff	RPS4A	3641247	XP_717144	1	XP_717065.1	39	13	0.47	53.8		262
MFG1_1 (N-GFP)	MFG1	3643884	XP_714447.2	4737	6279	30902	MFG1_1_BR2_IDA_TOF3_P50	30902_MFG1_1_BR2_IDA_TOF3_P50.wiff	THR1	3641572	XP_716762	1		3	3	0.04	12.9		357
MFG1_1 (N-GFP)	MFG1	3643884	XP_714447.2	4737	6279	30902	MFG1_1_BR2_IDA_TOF3_P50	30902_MFG1_1_BR2_IDA_TOF3_P50.wiff	CaO19.8815	3641863	XP_716483	1		4	4	0.05	11.2		534
MFG1_1 (N-GFP)	MFG1	3643884	XP_714447.2	4737	6279	30902	MFG1_1_BR2_IDA_TOF3_P50	30902_MFG1_1_BR2_IDA_TOF3_P50.wiff	CSI2	3642016	XP_716301	1		4	3	0.05	13		292
MFG1_1 (N-GFP)	MFG1	3643884	XP_714447.2	4737	6279	30902	MFG1_1_BR2_IDA_TOF3_P50	30902_MFG1_1_BR2_IDA_TOF3_P50.wiff	HSP104	3642228	XP_716146	1		3	3	0.04	4.4		899
MFG1_1 (N-GFP)	MFG1	3643884	XP_714447.2	4737	6279	30902	MFG1_1_BR2_IDA_TOF3_P50	30902_MFG1_1_BR2_IDA_TOF3_P50.wiff	NSA2	3642259	XP_716088	1		8	5	0.09	26.4		261
MFG1_1 (N-GFP)	MFG1	3643884	XP_714447.2	4737	6279	30902	MFG1_1_BR2_IDA_TOF3_P50	30902_MFG1_1_BR2_IDA_TOF3_P50.wiff	SEC3	3642733	XP_715622	1		2	2	0.02	4.6		788
MFG1_1 (N-GFP)	MFG1	3643884	XP_714447.2	4737	6279	30902	MFG1_1_BR2_IDA_TOF3_P50	30902_MFG1_1_BR2_IDA_TOF3_P50.wiff	UBI3	3642848	XP_715467	1	XP_715397.1	15	6	0.17	31.1		193
MFG1_1 (N-GFP)	MFG1	3643884	XP_714447.2	4737	6279	30902	MFG1_1_BR2_IDA_TOF3_P50	30902_MFG1_1_BR2_IDA_TOF3_P50.wiff	IDH2	3643036	XP_715267	1		8	7	0.1	30.1		369
MFG1_1 (N-GFP)	MFG1	3643884	XP_714447.2	4737	6279	30902	MFG1_1_BR2_IDA_TOF3_P50	30902_MFG1_1_BR2_IDA_TOF3_P50.wiff	CAALFM_C205270WA	3643470	XP_714915	1		2	2	0.02	2.7		948
MFG1_1 (N-GFP)	MFG1	3643884	XP_714447.2	4737	6279	30902	MFG1_1_BR2_IDA_TOF3_P50	30902_MFG1_1_BR2_IDA_TOF3_P50.wiff	SGN11	3643699	XP_714655	1		6	5	0.07	36.8		163
MFG1_1 (N-GFP)	MFG1	3643884	XP_714447.2	4737	6279	30902	MFG1_1_BR2_IDA_TOF3_P50	30902_MFG1_1_BR2_IDA_TOF3_P50.wiff	TIF4631	3643880	XP_714443	1		20	11	0.23	12.5		1084
MFG1_1 (N-GFP)	MFG1	3643884	XP_714447.2	4737	6279	30902	MFG1_1_BR2_IDA_TOF3_P50	30902_MFG1_1_BR2_IDA_TOF3_P50.wiff	ISW1	3644252	XP_714082	1	XP_713881.1	3	3	0.04	4		859
MFG1_1 (N-GFP)	MFG1	3643884	XP_714447.2	4737	6279	30902	MFG1_1_BR2_IDA_TOF3_P50	30902_MFG1_1_BR2_IDA_TOF3_P50.wiff	ACS2	3644652	XP_713713	1	XP_713668.1	8	8	0.09	12.5		671
MFG1_1 (N-GFP)	MFG1	3643884	XP_714447.2	4737	6279	30902	MFG1_1_BR2_IDA_TOF3_P50	30902_MFG1_1_BR2_IDA_TOF3_P50.wiff	LYS22	3645466	XP_712932	1	XP_712900.1	4	4	0.05	11.3		417
MFG1_1 (N-GFP)	MFG1	3643884	XP_714447.2	4737	6279	30902	MFG1_1_BR2_IDA_TOF3_P50	30902_MFG1_1_BR2_IDA_TOF3_P50.wiff	URA2	3645711	XP_712670	1		51	43	0.59	25.7		2216
MFG1_1 (N-GFP)	MFG1	3643884	XP_714447.2	4737	6279	30902	MFG1_1_BR2_IDA_TOF3_P50	30902_MFG1_1_BR2_IDA_TOF3_P50.wiff	GAG1	3645713	XP_712681	1	XP_712685.1; XP_712661.1; XP_712665.1; XP_710114.1	5	4	0.06	19.3		324
MFG1_1 (N-GFP)	MFG1	3643884	XP_714447.2	4737	6279	30902	MFG1_1_BR2_IDA_TOF3_P50	30902_MFG1_1_BR2_IDA_TOF3_P50.wiff	CaO19.7848	3645829	XP_712573	1		5	5	0.06	9.9		596
MFG1_1 (N-GFP)	MFG1	3643884	XP_714447.2	4737	6279	30902	MFG1_1_BR2_IDA_TOF3_P50	30902_MFG1_1_BR2_IDA_TOF3_P50.wiff	ATP1	3646134	XP_712242	1		16	10	0.2	28.2		447
MFG1_1 (N-GFP)	MFG1	3643884	XP_714447.2	4737	6279	30902	MFG1_1_BR2_IDA_TOF3_P50	30902_MFG1_1_BR2_IDA_TOF3_P50.wiff	CAALFM_C604290WA	3646280	XP_712099	1		3	3	0.04	7.1		622
MFG1_1 (N-GFP)	MFG1	3643884	XP_714447.2	4737	6279	30902	MFG1_1_BR2_IDA_TOF3_P50	30902_MFG1_1_BR2_IDA_TOF3_P50.wiff	MRPL22	3646777	XP_711609	1		3	3	0.04	13.7		291
MFG1_1 (N-GFP)	MFG1	3643884	XP_714447.2	4737	6279	30902	MFG1_1_BR2_IDA_TOF3_P50	30902_MFG1_1_BR2_IDA_TOF3_P50.wiff	CAALFM_C112760WA	3646817	XP_711564	1		5	5	0.05	15.9		321
MFG1_1 (N-GFP)	MFG1	3643884	XP_714447.2	4737	6279	30902	MFG1_1_BR2_IDA_TOF3_P50	30902_MFG1_1_BR2_IDA_TOF3_P50.wiff	CaO19.11188	3647328	XP_711056	1	XP_711043.1	10	7	0.1	21		606
MFG1_1 (N-GFP)	MFG1	3643884	XP_714447.2	4737	6279	30902	MFG1_1_BR2_IDA_TOF3_P50	30902_MFG1_1_BR2_IDA_TOF3_P50.wiff		3647600	XP_710785	1	XP_710772.1	2	2	0.02	7.7		220
MFG1_1 (N-GFP)	MFG1	3643884	XP_714447.2	4737	6279	30902	MFG1_1_BR2_IDA_TOF3_P50	30902_MFG1_1_BR2_IDA_TOF3_P50.wiff	RPA190	3647643	XP_710761	1	XP_710723.1	68	37	0.82	27.6		1665
MFG1_1 (N-GFP)	MFG1	3643884	XP_714447.2	4737	6279	30902	MFG1_1_BR2_IDA_TOF3_P50	30902_MFG1_1_BR2_IDA_TOF3_P50.wiff	SEC7	3635220	XP_723159	0.9999	XP_723012.1	2	2	0.02	1.4		1839
MFG1_1 (N-GFP)	MFG1	3643884	XP_714447.2	4737	6279	30902	MFG1_1_BR2_IDA_TOF3_P50	30902_MFG1_1_BR2_IDA_TOF3_P50.wiff	CAALFM_C301610WA	3636664	XP_721759	0.9999	XP_721640.1	2	2	0.02	5.4		386
MFG1_1 (N-GFP)	MFG1	3643884	XP_714447.2	4737	6279	30902	MFG1_1_BR2_IDA_TOF3_P50	30902_MFG1_1_BR2_IDA_TOF3_P50.wiff	CAALFM_C702120CA	3637019	XP_721341	0.9999	XP_720828.1; XP_888832.1	2	2	0.02	13.1		153
MFG1_1 (N-GFP)	MFG1	3643884	XP_714447.2	4737	6279	30902	MFG1_1_BR2_IDA_TOF3_P50	30902_MFG1_1_BR2_IDA_TOF3_P50.wiff	HHT1	3638444	XP_719887	0.9999	XP_719770.1	13	4	0.08	23.5		136
MFG1_1 (N-GFP)	MFG1	3643884	XP_714447.2	4737	6279	30902	MFG1_1_BR2_IDA_TOF3_P50	30902_MFG1_1_BR2_IDA_TOF3_P50.wiff	NUP170	3639767	XP_718589	0.9999	XP_718506.1	3	2	0.03	2.5		1426
MFG1_1 (N-GFP)	MFG1	3643884	XP_714447.2	4737	6279	30902	MFG1_1_BR2_IDA_TOF3_P50	30902_MFG1_1_BR2_IDA_TOF3_P50.wiff	CAALFM_CR09110CA	3641929	XP_716441	0.9999		3	2	0.03	9.8		285
MFG1_1 (N-GFP)	MFG1	3643884	XP_714447.2	4737	6279	30902	MFG1_1_BR2_IDA_TOF3_P50	30902_MFG1_1_BR2_IDA_TOF3_P50.wiff	MRPL10	3643375	XP_714954	0.9999	XP_714891.1	2	2	0.02	8.8		283
MFG1_1 (N-GFP)	MFG1	3643884	XP_714447.2	4737	6279	30902	MFG1_1_BR2_IDA_TOF3_P50	30902_MFG1_1_BR2_IDA_TOF3_P50.wiff	GLC7	3647257	XP_711142	0.9999	XP_711124.1	2	2	0.02	5.8		330
MFG1_1 (N-GFP)	MFG1	3643884	XP_714447.2	4737	6279	30902	MFG1_1_BR2_IDA_TOF3_P50	30902_MFG1_1_BR2_IDA_TOF3_P50.wiff	CFH	280816	Q28085	0.9998		5	3	0.03	4.2		1236
MFG1_1 (N-GFP)	MFG1	3643884	XP_714447.2	4737	6279	30902	MFG1_1_BR2_IDA_TOF3_P50	30902_MFG1_1_BR2_IDA_TOF3_P50.wiff	CAALFM_C307420WA	3638485	XP_719845	0.9998	XP_719728.1	2	2	0.02	6.1		328
MFG1_1 (N-GFP)	MFG1	3643884	XP_714447.2	4737	6279	30902	MFG1_1_BR2_IDA_TOF3_P50	30902_MFG1_1_BR2_IDA_TOF3_P50.wiff	ECM16	3638741	XP_719660	0.9998	XP_719536.1	2	2	0.02	1.6		1263
MFG1_1 (N-GFP)	MFG1	3643884	XP_714447.2	4737	6279	30902	MFG1_1_BR2_IDA_TOF3_P50	30902_MFG1_1_BR2_IDA_TOF3_P50.wiff	UTP18	3643123	XP_715203	0.9998	XP_889022.1	2	2	0.02	6.5		552
MFG1_1 (N-GFP)	MFG1	3643884	XP_714447.2	4737	6279	30902	MFG1_1_BR2_IDA_TOF3_P50	30902_MFG1_1_BR2_IDA_TOF3_P50.wiff	CHA2	3638689	XP_719575	0.9998		2	2	0.02	6.8		353
MFG1_1 (N-GFP)	MFG1	3643884	XP_714447.2	4737	6279	30902	MFG1_1_BR2_IDA_TOF3_P50	30902_MFG1_1_BR2_IDA_TOF3_P50.wiff	CaO19.9922	3645072	XP_713270	0.9997	XP_713219.1	2	2	0.02	7.7		247
MFG1_1 (N-GFP)	MFG1	3643884	XP_714447.2	4737	6279	30902	MFG1_1_BR2_IDA_TOF3_P50	30902_MFG1_1_BR2_IDA_TOF3_P50.wiff	SNL1	3647156	XP_711238	0.9997	XP_711215.1	2	2	0.02	11.6		199
MFG1_1 (N-GFP)	MFG1	3643884	XP_714447.2	4737	6279	30902	MFG1_1_BR2_IDA_TOF3_P50	30902_MFG1_1_BR2_IDA_TOF3_P50.wiff	RPO21	3638991	XP_719414	0.9997		5	2	0.03	1.7		1728
MFG1_1 (N-GFP)	MFG1	3643884	XP_714447.2	4737	6279	30902	MFG1_1_BR2_IDA_TOF3_P50	30902_MFG1_1_BR2_IDA_TOF3_P50.wiff	POX1-3	3636598	XP_721729	0.9996	XP_721610.1	2	2	0.02	3.5		709
MFG1_1 (N-GFP)	MFG1	3643884	XP_714447.2	4737	6279	30902	MFG1_1_BR2_IDA_TOF3_P50	30902_MFG1_1_BR2_IDA_TOF3_P50.wiff	GEA2	3636646	XP_721784	0.9996	XP_721663.1	3	2	0.02	3.8		1015
MFG1_1 (N-GFP)	MFG1	3643884	XP_714447.2	4737	6279	30902	MFG1_1_BR2_IDA_TOF3_P50	30902_MFG1_1_BR2_IDA_TOF3_P50.wiff	SDS24	3640756	XP_717654	0.9996	XP_717580.1	7	2	0.06	2.7		628
MFG1_1 (N-GFP)	MFG1	3643884	XP_714447.2	4737	6279	30902	MFG1_1_BR2_IDA_TOF3_P50	30902_MFG1_1_BR2_IDA_TOF3_P50.wiff	CaO19.11031	3643365	XP_714969	0.9995	XP_714906.1	6	3	0.04	6.3		667
MFG1_1 (N-GFP)	MFG1	3643884	XP_714447.2	4737	6279	30902	MFG1_1_BR2_IDA_TOF3_P50	30902_MFG1_1_BR2_IDA_TOF3_P50.wiff	MRP20	3639933	XP_718440	0.9994	XP_718173.1	2	2	0.02	7.2		293
MFG1_1 (N-GFP)	MFG1	3643884	XP_714447.2	4737	6279	30902	MFG1_1_BR2_IDA_TOF3_P50	30902_MFG1_1_BR2_IDA_TOF3_P50.wiff	TCI1	3636016	XP_722285	0.9988	XP_722173.1	2	2	0.02	4.5		398
MFG1_1 (N-GFP)	MFG1	3643884	XP_714447.2	4737	6279	30902	MFG1_1_BR2_IDA_TOF3_P50	30902_MFG1_1_BR2_IDA_TOF3_P50.wiff	CaO19.12393	3636101	XP_722252	0.9984	XP_722138.1	2	2	0.02	1.1		1732
MFG1_1 (N-GFP)	MFG1	3643884	XP_714447.2	4737	6279	30902	MFG1_1_BR2_IDA_TOF3_P50	30902_MFG1_1_BR2_IDA_TOF3_P50.wiff	CAALFM_C108160WA	3640733	XP_717630	0.998	XP_717556.1	2	2	0.02	9.1		352
MFG1_1 (N-GFP)	MFG1	3643884	XP_714447.2	4737	6279	30902	MFG1_1_BR2_IDA_TOF3_P50	30902_MFG1_1_BR2_IDA_TOF3_P50.wiff	MRP51	3647766	XP_710627	0.9978	XP_710613.1	2	2	0.02	7.1		371
MFG1_1 (N-GFP)	MFG1	3643884	XP_714447.2	4737	6279	30902	MFG1_1_BR2_IDA_TOF3_P50	30902_MFG1_1_BR2_IDA_TOF3_P50.wiff	IMG2	3641096	XP_717258	0.9974	XP_717182.1	2	2	0.01	16.3		123
MFG1_1 (N-GFP)	MFG1	3643884	XP_714447.2	4737	6279	30902	MFG1_1_BR2_IDA_TOF3_P50	30902_MFG1_1_BR2_IDA_TOF3_P50.wiff	ERG1	3646458	XP_711923	0.9971	XP_711894.1	2	2	0.02	5.4		496
MFG1_1 (N-GFP)	MFG1	3643884	XP_714447.2	4737	6279	30902	MFG1_1_BR2_IDA_TOF3_P50	30902_MFG1_1_BR2_IDA_TOF3_P50.wiff	CDC53	3636603	XP_721751	0.9968	XP_721632.1	2	2	0.02	2.1		752
MFG1_1 (N-GFP)	MFG1	3643884	XP_714447.2	4737	6279	30902	MFG1_1_BR2_IDA_TOF3_P50	30902_MFG1_1_BR2_IDA_TOF3_P50.wiff	CAALFM_C702460CA	3636946	XP_721306	0.9965	XP_720797.1; XP_888863.1	2	2	0.02	5.4		425
MFG1_1 (N-GFP)	MFG1	3643884	XP_714447.2	4737	6279	30902	MFG1_1_BR2_IDA_TOF3_P50	30902_MFG1_1_BR2_IDA_TOF3_P50.wiff	CAALFM_C106400CA	3639557	XP_718858	0.9957		4	2	0.03	2.5		710
MFG1_1 (N-GFP)	MFG1	3643884	XP_714447.2	4737	6279	30902	MFG1_1_BR2_IDA_TOF3_P50	30902_MFG1_1_BR2_IDA_TOF3_P50.wiff	TRF4	3642450	XP_715914	0.9953	XP_715864.1	2	2	0.02	3.3		603
MFG1_1 (N-GFP)	MFG1	3643884	XP_714447.2	4737	6279	30902	MFG1_1_BR2_IDA_TOF3_P50	30902_MFG1_1_BR2_IDA_TOF3_P50.wiff	CaO19.10422	3642765	XP_715615	0.9929	XP_715559.1	2	2	0.02	9.1		232
MFG1_1 (N-GFP)	MFG1	3643884	XP_714447.2	4737	6279	30902	MFG1_1_BR2_IDA_TOF3_P50	30902_MFG1_1_BR2_IDA_TOF3_P50.wiff	HHT1	3644649	XP_713710	0.9916	XP_713665.1; XP_711082.1; XP_711038.1	17	2	0.1	26.5		136
MFG1_1 (N-GFP)	MFG1	3643884	XP_714447.2	4737	6278	30881	MFG1_1_BR1_IDA_TOF3_P50	30881_MFG1_1_BR1_IDA_TOF3_P50.wiff			ENSEMBL:ENSBTAP00000018574	1		3	3	0.04	6.5	1	496
MFG1_1 (N-GFP)	MFG1	3643884	XP_714447.2	4737	6278	30881	MFG1_1_BR1_IDA_TOF3_P50	30881_MFG1_1_BR1_IDA_TOF3_P50.wiff			ENSEMBL:ENSBTAP00000024146	1		19	16	0.26	13.7	1	1477
MFG1_1 (N-GFP)	MFG1	3643884	XP_714447.2	4737	6278	30881	MFG1_1_BR1_IDA_TOF3_P50	30881_MFG1_1_BR1_IDA_TOF3_P50.wiff			P00761	1	TRYP_PIG	12	3	0.18	16.5	1	231
MFG1_1 (N-GFP)	MFG1	3643884	XP_714447.2	4737	6278	30881	MFG1_1_BR1_IDA_TOF3_P50	30881_MFG1_1_BR1_IDA_TOF3_P50.wiff	AHSG	280988	P12763	1		3	3	0.04	10		359
MFG1_1 (N-GFP)	MFG1	3643884	XP_714447.2	4737	6278	30881	MFG1_1_BR1_IDA_TOF3_P50	30881_MFG1_1_BR1_IDA_TOF3_P50.wiff	APOA1	281631	P15497	1		20	11	0.29	46		265
MFG1_1 (N-GFP)	MFG1	3643884	XP_714447.2	4737	6278	30881	MFG1_1_BR1_IDA_TOF3_P50	30881_MFG1_1_BR1_IDA_TOF3_P50.wiff	C3	280677	Q2UVX4	1		21	14	0.29	10.3		1662
MFG1_1 (N-GFP)	MFG1	3643884	XP_714447.2	4737	6278	30881	MFG1_1_BR1_IDA_TOF3_P50	30881_MFG1_1_BR1_IDA_TOF3_P50.wiff	APOA4	537301	Q32PJ2	1		3	3	0.04	8.2		380
MFG1_1 (N-GFP)	MFG1	3643884	XP_714447.2	4737	6278	30881	MFG1_1_BR1_IDA_TOF3_P50	30881_MFG1_1_BR1_IDA_TOF3_P50.wiff	AGT	527114	Q3SZH5	1		2	2	0.03	6.4		424
MFG1_1 (N-GFP)	MFG1	3643884	XP_714447.2	4737	6278	30881	MFG1_1_BR1_IDA_TOF3_P50	30881_MFG1_1_BR1_IDA_TOF3_P50.wiff	RPL7	6335362	XP_441054	1	XP_713533.1	11	6	0.15	25.4		295
MFG1_1 (N-GFP)	MFG1	3643884	XP_714447.2	4737	6278	30881	MFG1_1_BR1_IDA_TOF3_P50	30881_MFG1_1_BR1_IDA_TOF3_P50.wiff	MSS116	3634792	XP_723426	1	XP_723235.1	15	11	0.19	22.5		668
MFG1_1 (N-GFP)	MFG1	3643884	XP_714447.2	4737	6278	30881	MFG1_1_BR1_IDA_TOF3_P50	30881_MFG1_1_BR1_IDA_TOF3_P50.wiff	JIP5	3634922	XP_723432	1	XP_723241.1	2	2	0.03	3.7		542
MFG1_1 (N-GFP)	MFG1	3643884	XP_714447.2	4737	6278	30881	MFG1_1_BR1_IDA_TOF3_P50	30881_MFG1_1_BR1_IDA_TOF3_P50.wiff	YTM1	3634765	XP_723501	1	XP_723311.1	28	14	0.39	37.3		466
MFG1_1 (N-GFP)	MFG1	3643884	XP_714447.2	4737	6278	30881	MFG1_1_BR1_IDA_TOF3_P50	30881_MFG1_1_BR1_IDA_TOF3_P50.wiff	IDH1	3634893	XP_723512	1	XP_723322.1	3	2	0.04	10.4		193
MFG1_1 (N-GFP)	MFG1	3643884	XP_714447.2	4737	6278	30881	MFG1_1_BR1_IDA_TOF3_P50	30881_MFG1_1_BR1_IDA_TOF3_P50.wiff	CAALFM_C109710CA	3634818	XP_723521	1	XP_723331.1	7	5	0.07	12.7		527
MFG1_1 (N-GFP)	MFG1	3643884	XP_714447.2	4737	6278	30881	MFG1_1_BR1_IDA_TOF3_P50	30881_MFG1_1_BR1_IDA_TOF3_P50.wiff	DBP3	3634868	XP_723554	1	XP_723365.1	49	20	0.57	45.2		564
MFG1_1 (N-GFP)	MFG1	3643884	XP_714447.2	4737	6278	30881	MFG1_1_BR1_IDA_TOF3_P50	30881_MFG1_1_BR1_IDA_TOF3_P50.wiff	MIR1	3634782	XP_723568	1	XP_723379.1	17	11	0.25	38.1		307
MFG1_1 (N-GFP)	MFG1	3643884	XP_714447.2	4737	6278	30881	MFG1_1_BR1_IDA_TOF3_P50	30881_MFG1_1_BR1_IDA_TOF3_P50.wiff	CAALFM_C110190WA	3634785	XP_723571	1	XP_723383.1	3	2	0.04	13.7		277
MFG1_1 (N-GFP)	MFG1	3643884	XP_714447.2	4737	6278	30881	MFG1_1_BR1_IDA_TOF3_P50	30881_MFG1_1_BR1_IDA_TOF3_P50.wiff	RPA34	3634883	XP_723578	1	XP_723390.1	5	4	0.06	16.2		240
MFG1_1 (N-GFP)	MFG1	3643884	XP_714447.2	4737	6278	30881	MFG1_1_BR1_IDA_TOF3_P50	30881_MFG1_1_BR1_IDA_TOF3_P50.wiff	EGD2	3635284	XP_723074	1	XP_722928.1	3	3	0.04	22.5		178
MFG1_1 (N-GFP)	MFG1	3643884	XP_714447.2	4737	6278	30881	MFG1_1_BR1_IDA_TOF3_P50	30881_MFG1_1_BR1_IDA_TOF3_P50.wiff	CAALFM_C304370CA	3635172	XP_723100	1	XP_722953.1	10	10	0.15	9.4		1120
MFG1_1 (N-GFP)	MFG1	3643884	XP_714447.2	4737	6278	30881	MFG1_1_BR1_IDA_TOF3_P50	30881_MFG1_1_BR1_IDA_TOF3_P50.wiff	CAALFM_C304380CA	3635173	XP_723101	1	XP_722954.1	28	4	0.37	38.9		126
MFG1_1 (N-GFP)	MFG1	3643884	XP_714447.2	4737	6278	30881	MFG1_1_BR1_IDA_TOF3_P50	30881_MFG1_1_BR1_IDA_TOF3_P50.wiff	RPL19A	3635257	XP_723118	1	XP_722971.1	8	4	0.1	39.1		115
MFG1_1 (N-GFP)	MFG1	3643884	XP_714447.2	4737	6278	30881	MFG1_1_BR1_IDA_TOF3_P50	30881_MFG1_1_BR1_IDA_TOF3_P50.wiff	ZCF31	3635191	XP_723136	1	XP_722989.1	31	21	0.43	23.2		1130
MFG1_1 (N-GFP)	MFG1	3643884	XP_714447.2	4737	6278	30881	MFG1_1_BR1_IDA_TOF3_P50	30881_MFG1_1_BR1_IDA_TOF3_P50.wiff	RPS15	3635194	XP_723139	1	XP_722992.1	8	2	0.1	27.8		115
MFG1_1 (N-GFP)	MFG1	3643884	XP_714447.2	4737	6278	30881	MFG1_1_BR1_IDA_TOF3_P50	30881_MFG1_1_BR1_IDA_TOF3_P50.wiff	FAS2	3635223	XP_723162	1	XP_723015.1	6	6	0.09	10		804
MFG1_1 (N-GFP)	MFG1	3643884	XP_714447.2	4737	6278	30881	MFG1_1_BR1_IDA_TOF3_P50	30881_MFG1_1_BR1_IDA_TOF3_P50.wiff	NOP14	3635266	XP_723170	1	XP_723023.1	3	3	0.04	4.2		842
MFG1_1 (N-GFP)	MFG1	3643884	XP_714447.2	4737	6278	30881	MFG1_1_BR1_IDA_TOF3_P50	30881_MFG1_1_BR1_IDA_TOF3_P50.wiff	RPL18	3635156	XP_723193	1	XP_723046.1	34	5	0.49	34.4		154
MFG1_1 (N-GFP)	MFG1	3643884	XP_714447.2	4737	6278	30881	MFG1_1_BR1_IDA_TOF3_P50	30881_MFG1_1_BR1_IDA_TOF3_P50.wiff	CAALFM_C305160CA	3635229	XP_723201	1	XP_723054.1	27	23	0.38	28.2		908
MFG1_1 (N-GFP)	MFG1	3643884	XP_714447.2	4737	6278	30881	MFG1_1_BR1_IDA_TOF3_P50	30881_MFG1_1_BR1_IDA_TOF3_P50.wiff	RPL8B	3635198	XP_723211	1	XP_723064.1	55	15	0.42	55.7		262
MFG1_1 (N-GFP)	MFG1	3643884	XP_714447.2	4737	6278	30881	MFG1_1_BR1_IDA_TOF3_P50	30881_MFG1_1_BR1_IDA_TOF3_P50.wiff	BFR1	3635540	XP_722778	1	XP_722633.1	3	3	0.04	7.6		462
MFG1_1 (N-GFP)	MFG1	3643884	XP_714447.2	4737	6278	30881	MFG1_1_BR1_IDA_TOF3_P50	30881_MFG1_1_BR1_IDA_TOF3_P50.wiff	CaO19.12032	3635543	XP_722781	1	XP_722636.1	42	15	0.58	43.1		371
MFG1_1 (N-GFP)	MFG1	3643884	XP_714447.2	4737	6278	30881	MFG1_1_BR1_IDA_TOF3_P50	30881_MFG1_1_BR1_IDA_TOF3_P50.wiff	HGH1	3635519	XP_722804	1	XP_722659.1	3	3	0.04	7.7		362
MFG1_1 (N-GFP)	MFG1	3643884	XP_714447.2	4737	6278	30881	MFG1_1_BR1_IDA_TOF3_P50	30881_MFG1_1_BR1_IDA_TOF3_P50.wiff	MDH1	3635558	XP_722820	1	XP_722674.1	4	4	0.06	19		332
MFG1_1 (N-GFP)	MFG1	3643884	XP_714447.2	4737	6278	30881	MFG1_1_BR1_IDA_TOF3_P50	30881_MFG1_1_BR1_IDA_TOF3_P50.wiff	FBA1	3635548	XP_722836	1	XP_722690.1	8	6	0.11	25.6		359
MFG1_1 (N-GFP)	MFG1	3643884	XP_714447.2	4737	6278	30881	MFG1_1_BR1_IDA_TOF3_P50	30881_MFG1_1_BR1_IDA_TOF3_P50.wiff	NIP1	3635435	XP_722853	1	XP_722707.1	16	11	0.21	13.7		874
MFG1_1 (N-GFP)	MFG1	3643884	XP_714447.2	4737	6278	30881	MFG1_1_BR1_IDA_TOF3_P50	30881_MFG1_1_BR1_IDA_TOF3_P50.wiff	PWP1	3635456	XP_722858	1	XP_722712.1	5	4	0.07	9.6		612
MFG1_1 (N-GFP)	MFG1	3643884	XP_714447.2	4737	6278	30881	MFG1_1_BR1_IDA_TOF3_P50	30881_MFG1_1_BR1_IDA_TOF3_P50.wiff	RPS6	3635476	XP_722877	1	XP_722731.1	7	4	0.09	25.4		205
MFG1_1 (N-GFP)	MFG1	3643884	XP_714447.2	4737	6278	30881	MFG1_1_BR1_IDA_TOF3_P50	30881_MFG1_1_BR1_IDA_TOF3_P50.wiff	SPT5	3635847	XP_722503	1	XP_722364.1	12	12	0.17	13.3		956
MFG1_1 (N-GFP)	MFG1	3643884	XP_714447.2	4737	6278	30881	MFG1_1_BR1_IDA_TOF3_P50	30881_MFG1_1_BR1_IDA_TOF3_P50.wiff	RPS26A	3635787	XP_722520	1	XP_722381.1	14	4	0.2	27.7		119
MFG1_1 (N-GFP)	MFG1	3643884	XP_714447.2	4737	6278	30881	MFG1_1_BR1_IDA_TOF3_P50	30881_MFG1_1_BR1_IDA_TOF3_P50.wiff	UTP21	3635757	XP_722608	1	XP_722467.1	2	2	0.03	3.5		942
MFG1_1 (N-GFP)	MFG1	3643884	XP_714447.2	4737	6278	30881	MFG1_1_BR1_IDA_TOF3_P50	30881_MFG1_1_BR1_IDA_TOF3_P50.wiff	UTP22	3635760	XP_722611	1	XP_722470.1	11	11	0.16	13.8		1175
MFG1_1 (N-GFP)	MFG1	3643884	XP_714447.2	4737	6278	30881	MFG1_1_BR1_IDA_TOF3_P50	30881_MFG1_1_BR1_IDA_TOF3_P50.wiff	CAALFM_C202540WA	3635820	XP_722620	1	XP_722479.1	17	14	0.23	9.8		1722
MFG1_1 (N-GFP)	MFG1	3643884	XP_714447.2	4737	6278	30881	MFG1_1_BR1_IDA_TOF3_P50	30881_MFG1_1_BR1_IDA_TOF3_P50.wiff	HSP70	3636073	XP_722300	1	XP_722186.1	57	6	0.44	38.9		656
MFG1_1 (N-GFP)	MFG1	3643884	XP_714447.2	4737	6278	30881	MFG1_1_BR1_IDA_TOF3_P50	30881_MFG1_1_BR1_IDA_TOF3_P50.wiff	DIM1	3636084	XP_722328	1	XP_722214.1	4	4	0.06	17.5		326
MFG1_1 (N-GFP)	MFG1	3643884	XP_714447.2	4737	6278	30881	MFG1_1_BR1_IDA_TOF3_P50	30881_MFG1_1_BR1_IDA_TOF3_P50.wiff	MYO2	3636089	XP_722333	1	XP_722219.1	14	12	0.18	9.7		1561
MFG1_1 (N-GFP)	MFG1	3643884	XP_714447.2	4737	6278	30881	MFG1_1_BR1_IDA_TOF3_P50	30881_MFG1_1_BR1_IDA_TOF3_P50.wiff	DOR14	3636097	XP_722341	1	XP_722227.1	6	5	0.08	13.9		517
MFG1_1 (N-GFP)	MFG1	3643884	XP_714447.2	4737	6278	30881	MFG1_1_BR1_IDA_TOF3_P50	30881_MFG1_1_BR1_IDA_TOF3_P50.wiff	SAH1	3636277	XP_721980	1	XP_721821.1	6	3	0.05	9.8		450
MFG1_1 (N-GFP)	MFG1	3643884	XP_714447.2	4737	6278	30881	MFG1_1_BR1_IDA_TOF3_P50	30881_MFG1_1_BR1_IDA_TOF3_P50.wiff	MPD1	3636235	XP_721990	1	XP_721830.1	3	2	0.04	5.7		299
MFG1_1 (N-GFP)	MFG1	3643884	XP_714447.2	4737	6278	30881	MFG1_1_BR1_IDA_TOF3_P50	30881_MFG1_1_BR1_IDA_TOF3_P50.wiff	YTA7	3636302	XP_722018	1	XP_721858.1	31	16	0.43	15.5		1314
MFG1_1 (N-GFP)	MFG1	3643884	XP_714447.2	4737	6278	30881	MFG1_1_BR1_IDA_TOF3_P50	30881_MFG1_1_BR1_IDA_TOF3_P50.wiff	SSD1	3636358	XP_722028	1	XP_721868.1	7	6	0.09	5.9		1262
MFG1_1 (N-GFP)	MFG1	3643884	XP_714447.2	4737	6278	30881	MFG1_1_BR1_IDA_TOF3_P50	30881_MFG1_1_BR1_IDA_TOF3_P50.wiff	HAS1	3636361	XP_722031	1	XP_721871.1	28	15	0.41	30.4		569
MFG1_1 (N-GFP)	MFG1	3643884	XP_714447.2	4737	6278	30881	MFG1_1_BR1_IDA_TOF3_P50	30881_MFG1_1_BR1_IDA_TOF3_P50.wiff	PFK1	3636239	XP_722036	1	XP_721876.1	3	3	0.04	3.3		987
MFG1_1 (N-GFP)	MFG1	3643884	XP_714447.2	4737	6278	30881	MFG1_1_BR1_IDA_TOF3_P50	30881_MFG1_1_BR1_IDA_TOF3_P50.wiff	CaO19.11461	3636311	XP_722048	1	XP_721887.1	2	2	0.03	11.4		237
MFG1_1 (N-GFP)	MFG1	3643884	XP_714447.2	4737	6278	30881	MFG1_1_BR1_IDA_TOF3_P50	30881_MFG1_1_BR1_IDA_TOF3_P50.wiff	CCT3	3636327	XP_722073	1	XP_721912.1	3	2	0.03	4.7		529
MFG1_1 (N-GFP)	MFG1	3643884	XP_714447.2	4737	6278	30881	MFG1_1_BR1_IDA_TOF3_P50	30881_MFG1_1_BR1_IDA_TOF3_P50.wiff	ILV2	3636552	XP_721692	1	XP_721571.1	9	8	0.13	16.1		683
MFG1_1 (N-GFP)	MFG1	3643884	XP_714447.2	4737	6278	30881	MFG1_1_BR1_IDA_TOF3_P50	30881_MFG1_1_BR1_IDA_TOF3_P50.wiff	GFA1	3636557	XP_721697	1	XP_721577.1	8	6	0.12	9.7		713
MFG1_1 (N-GFP)	MFG1	3643884	XP_714447.2	4737	6278	30881	MFG1_1_BR1_IDA_TOF3_P50	30881_MFG1_1_BR1_IDA_TOF3_P50.wiff	CAALFM_C302160CA	3636654	XP_721707	1	XP_721587.1	31	17	0.42	32.9		732
MFG1_1 (N-GFP)	MFG1	3643884	XP_714447.2	4737	6278	30881	MFG1_1_BR1_IDA_TOF3_P50	30881_MFG1_1_BR1_IDA_TOF3_P50.wiff	UTP4	3636657	XP_721710	1	XP_721590.1	7	7	0.1	9.7		743
MFG1_1 (N-GFP)	MFG1	3643884	XP_714447.2	4737	6278	30881	MFG1_1_BR1_IDA_TOF3_P50	30881_MFG1_1_BR1_IDA_TOF3_P50.wiff	RPL12	3636659	XP_721712	1	XP_721592.1	22	6	0.31	42.4		165
MFG1_1 (N-GFP)	MFG1	3643884	XP_714447.2	4737	6278	30881	MFG1_1_BR1_IDA_TOF3_P50	30881_MFG1_1_BR1_IDA_TOF3_P50.wiff	CAALFM_C302040CA	3636579	XP_721719	1	XP_721598.1	8	5	0.1	23.3		206
MFG1_1 (N-GFP)	MFG1	3643884	XP_714447.2	4737	6278	30881	MFG1_1_BR1_IDA_TOF3_P50	30881_MFG1_1_BR1_IDA_TOF3_P50.wiff	DBP5	3636564	XP_721738	1	XP_721619.1	8	5	0.1	13.3		540
MFG1_1 (N-GFP)	MFG1	3643884	XP_714447.2	4737	6278	30881	MFG1_1_BR1_IDA_TOF3_P50	30881_MFG1_1_BR1_IDA_TOF3_P50.wiff	CAALFM_C301720CA	3636601	XP_721749	1	XP_721630.1	19	16	0.25	17.7		1221
MFG1_1 (N-GFP)	MFG1	3643884	XP_714447.2	4737	6278	30881	MFG1_1_BR1_IDA_TOF3_P50	30881_MFG1_1_BR1_IDA_TOF3_P50.wiff	CAALFM_C301560WA	3636669	XP_721764	1	XP_721644.1	89	26	1.21	38.6		767
MFG1_1 (N-GFP)	MFG1	3643884	XP_714447.2	4737	6278	30881	MFG1_1_BR1_IDA_TOF3_P50	30881_MFG1_1_BR1_IDA_TOF3_P50.wiff	CAALFM_C301520CA	3636570	XP_721769	1	XP_721648.1	2	2	0.03	6.5		353
MFG1_1 (N-GFP)	MFG1	3643884	XP_714447.2	4737	6278	30881	MFG1_1_BR1_IDA_TOF3_P50	30881_MFG1_1_BR1_IDA_TOF3_P50.wiff	RPS7A	3636573	XP_721772	1	XP_721651.1	39	10	0.54	55.9		186
MFG1_1 (N-GFP)	MFG1	3643884	XP_714447.2	4737	6278	30881	MFG1_1_BR1_IDA_TOF3_P50	30881_MFG1_1_BR1_IDA_TOF3_P50.wiff	ARF3	3636628	XP_721774	1	XP_721653.1	3	2	0.04	14.8		162
MFG1_1 (N-GFP)	MFG1	3643884	XP_714447.2	4737	6278	30881	MFG1_1_BR1_IDA_TOF3_P50	30881_MFG1_1_BR1_IDA_TOF3_P50.wiff	UTP20	3636614	XP_721804	1	XP_721684.1	2	2	0.03	6.1		508
MFG1_1 (N-GFP)	MFG1	3643884	XP_714447.2	4737	6278	30881	MFG1_1_BR1_IDA_TOF3_P50	30881_MFG1_1_BR1_IDA_TOF3_P50.wiff	RPL10	3636850	XP_721434	1	XP_721162.1	14	7	0.18	35.5		220
MFG1_1 (N-GFP)	MFG1	3643884	XP_714447.2	4737	6278	30881	MFG1_1_BR1_IDA_TOF3_P50	30881_MFG1_1_BR1_IDA_TOF3_P50.wiff	TIF34	3636872	XP_721466	1	XP_721194.1	10	7	0.13	25.1		350
MFG1_1 (N-GFP)	MFG1	3643884	XP_714447.2	4737	6278	30881	MFG1_1_BR1_IDA_TOF3_P50	30881_MFG1_1_BR1_IDA_TOF3_P50.wiff	YKT6	3636863	XP_721473	1	XP_721201.1	6	5	0.08	29		200
MFG1_1 (N-GFP)	MFG1	3643884	XP_714447.2	4737	6278	30881	MFG1_1_BR1_IDA_TOF3_P50	30881_MFG1_1_BR1_IDA_TOF3_P50.wiff	RPL13	3636841	XP_721492	1	XP_721220.1	16	7	0.22	31.7		202
MFG1_1 (N-GFP)	MFG1	3643884	XP_714447.2	4737	6278	30881	MFG1_1_BR1_IDA_TOF3_P50	30881_MFG1_1_BR1_IDA_TOF3_P50.wiff	RPS1	3636924	XP_721500	1	XP_721229.1	31	12	0.44	47.3		256
MFG1_1 (N-GFP)	MFG1	3643884	XP_714447.2	4737	6278	30881	MFG1_1_BR1_IDA_TOF3_P50	30881_MFG1_1_BR1_IDA_TOF3_P50.wiff	BMH1	3636810	XP_721512	1	XP_721241.1	8	7	0.12	29.5		264
MFG1_1 (N-GFP)	MFG1	3643884	XP_714447.2	4737	6278	30881	MFG1_1_BR1_IDA_TOF3_P50	30881_MFG1_1_BR1_IDA_TOF3_P50.wiff	RLI1	3636888	XP_721532	1	XP_721261.1	7	6	0.09	11.9		622
MFG1_1 (N-GFP)	MFG1	3643884	XP_714447.2	4737	6278	30881	MFG1_1_BR1_IDA_TOF3_P50	30881_MFG1_1_BR1_IDA_TOF3_P50.wiff	CAALFM_C103360WA	3636889	XP_721533	1	XP_721262.1	4	4	0.06	3.1		1410
MFG1_1 (N-GFP)	MFG1	3643884	XP_714447.2	4737	6278	30881	MFG1_1_BR1_IDA_TOF3_P50	30881_MFG1_1_BR1_IDA_TOF3_P50.wiff	CAALFM_C103370WA	3636891	XP_721535	1	XP_721264.1	8	7	0.09	10.8		629
MFG1_1 (N-GFP)	MFG1	3643884	XP_714447.2	4737	6278	30881	MFG1_1_BR1_IDA_TOF3_P50	30881_MFG1_1_BR1_IDA_TOF3_P50.wiff	COQ6	3636878	XP_721556	1	XP_721285.1	2	2	0.03	4.8		480
MFG1_1 (N-GFP)	MFG1	3643884	XP_714447.2	4737	6278	30881	MFG1_1_BR1_IDA_TOF3_P50	30881_MFG1_1_BR1_IDA_TOF3_P50.wiff	HSP90	3636951	XP_721353	1	XP_720840.1; XP_888823.1	26	16	0.36	24.2		707
MFG1_1 (N-GFP)	MFG1	3643884	XP_714447.2	4737	6278	30881	MFG1_1_BR1_IDA_TOF3_P50	30881_MFG1_1_BR1_IDA_TOF3_P50.wiff	PFK2	3637056	XP_721378	1	XP_720865.1; XP_888801.1	6	5	0.08	6.8		946
MFG1_1 (N-GFP)	MFG1	3643884	XP_714447.2	4737	6278	30881	MFG1_1_BR1_IDA_TOF3_P50	30881_MFG1_1_BR1_IDA_TOF3_P50.wiff	RPL5	3637057	XP_721379	1	XP_720866.1; XP_888800.1	7	3	0.1	11.4		298
MFG1_1 (N-GFP)	MFG1	3643884	XP_714447.2	4737	6278	30881	MFG1_1_BR1_IDA_TOF3_P50	30881_MFG1_1_BR1_IDA_TOF3_P50.wiff	LAT1	3636986	XP_721397	1	XP_720884.1; XP_888786.1	4	4	0.06	9.4		477
MFG1_1 (N-GFP)	MFG1	3643884	XP_714447.2	4737	6278	30881	MFG1_1_BR1_IDA_TOF3_P50	30881_MFG1_1_BR1_IDA_TOF3_P50.wiff	PRT1	3636959	XP_721420	1	XP_720907.1; XP_888768.1	14	10	0.19	15		739
MFG1_1 (N-GFP)	MFG1	3643884	XP_714447.2	4737	6278	30881	MFG1_1_BR1_IDA_TOF3_P50	30881_MFG1_1_BR1_IDA_TOF3_P50.wiff	NOP12	3637230	XP_721055	1	XP_720933.1	16	9	0.21	22		454
MFG1_1 (N-GFP)	MFG1	3643884	XP_714447.2	4737	6278	30881	MFG1_1_BR1_IDA_TOF3_P50	30881_MFG1_1_BR1_IDA_TOF3_P50.wiff	CaO19.8435	3637236	XP_721061	1	XP_720939.1	5	4	0.05	3.2		1914
MFG1_1 (N-GFP)	MFG1	3643884	XP_714447.2	4737	6278	30881	MFG1_1_BR1_IDA_TOF3_P50	30881_MFG1_1_BR1_IDA_TOF3_P50.wiff	GCD7	3637289	XP_721071	1	XP_720949.1	4	4	0.06	13.4		365
MFG1_1 (N-GFP)	MFG1	3643884	XP_714447.2	4737	6278	30881	MFG1_1_BR1_IDA_TOF3_P50	30881_MFG1_1_BR1_IDA_TOF3_P50.wiff	RPL21	3637227	XP_721086	1	XP_720964.1	9	4	0.12	44		109
MFG1_1 (N-GFP)	MFG1	3643884	XP_714447.2	4737	6278	30881	MFG1_1_BR1_IDA_TOF3_P50	30881_MFG1_1_BR1_IDA_TOF3_P50.wiff	GPM1	3637276	XP_721143	1	XP_721022.1	6	4	0.06	23.8		248
MFG1_1 (N-GFP)	MFG1	3643884	XP_714447.2	4737	6278	30881	MFG1_1_BR1_IDA_TOF3_P50	30881_MFG1_1_BR1_IDA_TOF3_P50.wiff	GCD11	3637619	XP_720662	1	XP_720534.1	10	8	0.12	20		534
MFG1_1 (N-GFP)	MFG1	3643884	XP_714447.2	4737	6278	30881	MFG1_1_BR1_IDA_TOF3_P50	30881_MFG1_1_BR1_IDA_TOF3_P50.wiff	RET2	3637630	XP_720673	1	XP_720546.1	3	3	0.04	7.2		573
MFG1_1 (N-GFP)	MFG1	3643884	XP_714447.2	4737	6278	30881	MFG1_1_BR1_IDA_TOF3_P50	30881_MFG1_1_BR1_IDA_TOF3_P50.wiff	CaO19.11744	3637636	XP_720704	1	XP_720576.1	8	7	0.11	9.6		799
MFG1_1 (N-GFP)	MFG1	3643884	XP_714447.2	4737	6278	30881	MFG1_1_BR1_IDA_TOF3_P50	30881_MFG1_1_BR1_IDA_TOF3_P50.wiff	CaO19.11759	3637587	XP_720719	1	XP_720591.1	3	3	0.04	14.9		335
MFG1_1 (N-GFP)	MFG1	3643884	XP_714447.2	4737	6278	30881	MFG1_1_BR1_IDA_TOF3_P50	30881_MFG1_1_BR1_IDA_TOF3_P50.wiff	YNK1	3637693	XP_720745	1	XP_720618.1	2	2	0.03	14.6		151
MFG1_1 (N-GFP)	MFG1	3643884	XP_714447.2	4737	6278	30881	MFG1_1_BR1_IDA_TOF3_P50	30881_MFG1_1_BR1_IDA_TOF3_P50.wiff	RPS5	3637570	XP_720769	1	XP_720641.1	16	8	0.23	44.4		225
MFG1_1 (N-GFP)	MFG1	3643884	XP_714447.2	4737	6278	30881	MFG1_1_BR1_IDA_TOF3_P50	30881_MFG1_1_BR1_IDA_TOF3_P50.wiff	CAALFM_C403290WA	3637887	XP_720417	1	XP_720189.1	4	3	0.04	4.8		899
MFG1_1 (N-GFP)	MFG1	3643884	XP_714447.2	4737	6278	30881	MFG1_1_BR1_IDA_TOF3_P50	30881_MFG1_1_BR1_IDA_TOF3_P50.wiff	RPF1	3637890	XP_720420	1	XP_720192.1	16	9	0.2	35.5		296
MFG1_1 (N-GFP)	MFG1	3643884	XP_714447.2	4737	6278	30881	MFG1_1_BR1_IDA_TOF3_P50	30881_MFG1_1_BR1_IDA_TOF3_P50.wiff	NAN1	3637932	XP_720441	1	XP_720211.1	11	9	0.15	15.4		839
MFG1_1 (N-GFP)	MFG1	3643884	XP_714447.2	4737	6278	30881	MFG1_1_BR1_IDA_TOF3_P50	30881_MFG1_1_BR1_IDA_TOF3_P50.wiff	ZUO1	3637908	XP_720460	1	XP_720230.1	7	6	0.07	19		427
MFG1_1 (N-GFP)	MFG1	3643884	XP_714447.2	4737	6278	30881	MFG1_1_BR1_IDA_TOF3_P50	30881_MFG1_1_BR1_IDA_TOF3_P50.wiff	HCA4	3637911	XP_720463	1	XP_720233.1	3	3	0.04	4.6		765
MFG1_1 (N-GFP)	MFG1	3643884	XP_714447.2	4737	6278	30881	MFG1_1_BR1_IDA_TOF3_P50	30881_MFG1_1_BR1_IDA_TOF3_P50.wiff	SAS10	3637899	XP_720467	1	XP_720237.1	3	2	0.03	6		564
MFG1_1 (N-GFP)	MFG1	3643884	XP_714447.2	4737	6278	30881	MFG1_1_BR1_IDA_TOF3_P50	30881_MFG1_1_BR1_IDA_TOF3_P50.wiff	CAALFM_C402780WA	3637902	XP_720470	1	XP_720240.1	5	5	0.07	11.6		544
MFG1_1 (N-GFP)	MFG1	3643884	XP_714447.2	4737	6278	30881	MFG1_1_BR1_IDA_TOF3_P50	30881_MFG1_1_BR1_IDA_TOF3_P50.wiff	CAALFM_C701030CA	3638019	XP_720305	1	XP_888733.1	18	11	0.21	15.3		1217
MFG1_1 (N-GFP)	MFG1	3643884	XP_714447.2	4737	6278	30881	MFG1_1_BR1_IDA_TOF3_P50	30881_MFG1_1_BR1_IDA_TOF3_P50.wiff	RPP0	3638023	XP_720309	1	XP_888730.1	33	9	0.47	34.9		312
MFG1_1 (N-GFP)	MFG1	3643884	XP_714447.2	4737	6278	30881	MFG1_1_BR1_IDA_TOF3_P50	30881_MFG1_1_BR1_IDA_TOF3_P50.wiff	PHM5	3637951	XP_720310	1	XP_888729.1	3	3	0.04	4.5		662
MFG1_1 (N-GFP)	MFG1	3643884	XP_714447.2	4737	6278	30881	MFG1_1_BR1_IDA_TOF3_P50	30881_MFG1_1_BR1_IDA_TOF3_P50.wiff	RPS18	3637953	XP_720312	1	XP_888727.1	15	5	0.19	37.8		135
MFG1_1 (N-GFP)	MFG1	3643884	XP_714447.2	4737	6278	30881	MFG1_1_BR1_IDA_TOF3_P50	30881_MFG1_1_BR1_IDA_TOF3_P50.wiff	YML6	3637954	XP_720313	1	XP_888726.1	3	2	0.04	10.1		278
MFG1_1 (N-GFP)	MFG1	3643884	XP_714447.2	4737	6278	30881	MFG1_1_BR1_IDA_TOF3_P50	30881_MFG1_1_BR1_IDA_TOF3_P50.wiff	NOP15	3637966	XP_720342	1	XP_888701.1	14	6	0.19	27		267
MFG1_1 (N-GFP)	MFG1	3643884	XP_714447.2	4737	6278	30881	MFG1_1_BR1_IDA_TOF3_P50	30881_MFG1_1_BR1_IDA_TOF3_P50.wiff	RPA135	3637996	XP_720354	1	XP_888689.1	21	17	0.26	16.6		1166
MFG1_1 (N-GFP)	MFG1	3643884	XP_714447.2	4737	6278	30881	MFG1_1_BR1_IDA_TOF3_P50	30881_MFG1_1_BR1_IDA_TOF3_P50.wiff	CAALFM_C700350CA	3638039	XP_720376	1	XP_888669.1	13	9	0.18	25.7		439
MFG1_1 (N-GFP)	MFG1	3643884	XP_714447.2	4737	6278	30881	MFG1_1_BR1_IDA_TOF3_P50	30881_MFG1_1_BR1_IDA_TOF3_P50.wiff	CAALFM_C700250CA	3637979	XP_720388	1	XP_888659.1	4	4	0.06	33.7		187
MFG1_1 (N-GFP)	MFG1	3643884	XP_714447.2	4737	6278	30881	MFG1_1_BR1_IDA_TOF3_P50	30881_MFG1_1_BR1_IDA_TOF3_P50.wiff	RVS161	3638005	XP_720414	1	XP_888636.1	2	2	0.03	8.7		293
MFG1_1 (N-GFP)	MFG1	3643884	XP_714447.2	4737	6278	30881	MFG1_1_BR1_IDA_TOF3_P50	30881_MFG1_1_BR1_IDA_TOF3_P50.wiff	RPL9	3638287	XP_720065	1	XP_719935.1	15	7	0.21	39.8		191
MFG1_1 (N-GFP)	MFG1	3643884	XP_714447.2	4737	6278	30881	MFG1_1_BR1_IDA_TOF3_P50	30881_MFG1_1_BR1_IDA_TOF3_P50.wiff	SEC13	3638207	XP_720143	1	XP_720011.1	2	2	0.03	6.2		370
MFG1_1 (N-GFP)	MFG1	3643884	XP_714447.2	4737	6278	30881	MFG1_1_BR1_IDA_TOF3_P50	30881_MFG1_1_BR1_IDA_TOF3_P50.wiff	HTZ1	3638209	XP_720154	1	XP_720022.1	17	3	0.19	30.1		133
MFG1_1 (N-GFP)	MFG1	3643884	XP_714447.2	4737	6278	30881	MFG1_1_BR1_IDA_TOF3_P50	30881_MFG1_1_BR1_IDA_TOF3_P50.wiff	UTP9	3638451	XP_719810	1	XP_719693.1	2	2	0.03	5.6		445
MFG1_1 (N-GFP)	MFG1	3643884	XP_714447.2	4737	6278	30881	MFG1_1_BR1_IDA_TOF3_P50	30881_MFG1_1_BR1_IDA_TOF3_P50.wiff	TPI1	3638482	XP_719842	1	XP_719725.1	7	5	0.09	27		248
MFG1_1 (N-GFP)	MFG1	3643884	XP_714447.2	4737	6278	30881	MFG1_1_BR1_IDA_TOF3_P50	30881_MFG1_1_BR1_IDA_TOF3_P50.wiff	CAALFM_C307420WA	3638485	XP_719845	1	XP_719728.1	2	2	0.03	6.1		328
MFG1_1 (N-GFP)	MFG1	3643884	XP_714447.2	4737	6278	30881	MFG1_1_BR1_IDA_TOF3_P50	30881_MFG1_1_BR1_IDA_TOF3_P50.wiff	NOP13	3638469	XP_719862	1	XP_719745.1	5	5	0.07	18.9		396
MFG1_1 (N-GFP)	MFG1	3643884	XP_714447.2	4737	6278	30881	MFG1_1_BR1_IDA_TOF3_P50	30881_MFG1_1_BR1_IDA_TOF3_P50.wiff	RPS12	3638438	XP_719881	1	XP_719764.1	7	3	0.08	20.3		143
MFG1_1 (N-GFP)	MFG1	3643884	XP_714447.2	4737	6278	30881	MFG1_1_BR1_IDA_TOF3_P50	30881_MFG1_1_BR1_IDA_TOF3_P50.wiff	HHT1	3638444	XP_719887	1	XP_719770.1	22	5	0.18	24.3		136
MFG1_1 (N-GFP)	MFG1	3643884	XP_714447.2	4737	6278	30881	MFG1_1_BR1_IDA_TOF3_P50	30881_MFG1_1_BR1_IDA_TOF3_P50.wiff	TPD3	3638512	XP_719905	1	XP_719788.1	4	3	0.04	4.8		643
MFG1_1 (N-GFP)	MFG1	3643884	XP_714447.2	4737	6278	30881	MFG1_1_BR1_IDA_TOF3_P50	30881_MFG1_1_BR1_IDA_TOF3_P50.wiff	TDH3	3638540	XP_719909	1	XP_719792.1	32	15	0.45	53.7		335
MFG1_1 (N-GFP)	MFG1	3643884	XP_714447.2	4737	6278	30881	MFG1_1_BR1_IDA_TOF3_P50	30881_MFG1_1_BR1_IDA_TOF3_P50.wiff	CAALFM_C306760WA	3638502	XP_719920	1	XP_719803.1	5	4	0.05	13.1		275
MFG1_1 (N-GFP)	MFG1	3643884	XP_714447.2	4737	6278	30881	MFG1_1_BR1_IDA_TOF3_P50	30881_MFG1_1_BR1_IDA_TOF3_P50.wiff	KAR2	3638764	XP_719590	1	XP_719462.1	38	20	0.47	31.3		687
MFG1_1 (N-GFP)	MFG1	3643884	XP_714447.2	4737	6278	30881	MFG1_1_BR1_IDA_TOF3_P50	30881_MFG1_1_BR1_IDA_TOF3_P50.wiff	RPA49	3638767	XP_719593	1	XP_719466.1	6	3	0.09	10.9		393
MFG1_1 (N-GFP)	MFG1	3643884	XP_714447.2	4737	6278	30881	MFG1_1_BR1_IDA_TOF3_P50	30881_MFG1_1_BR1_IDA_TOF3_P50.wiff	HXT63	3638770	XP_719596	1	XP_719597.1; XP_719598.1; XP_719469.1; XP_719471.1; XP_719472.1	4	3	0.06	8		550
MFG1_1 (N-GFP)	MFG1	3643884	XP_714447.2	4737	6278	30881	MFG1_1_BR1_IDA_TOF3_P50	30881_MFG1_1_BR1_IDA_TOF3_P50.wiff	RFC5	3638785	XP_719603	1	XP_719478.1	4	4	0.06	14.9		362
MFG1_1 (N-GFP)	MFG1	3643884	XP_714447.2	4737	6278	30881	MFG1_1_BR1_IDA_TOF3_P50	30881_MFG1_1_BR1_IDA_TOF3_P50.wiff	CKB1	3638710	XP_719673	1	XP_719548.1	2	2	0.03	6.1		293
MFG1_1 (N-GFP)	MFG1	3643884	XP_714447.2	4737	6278	30881	MFG1_1_BR1_IDA_TOF3_P50	30881_MFG1_1_BR1_IDA_TOF3_P50.wiff	NDT801	3638718	XP_719690	1	XP_719565.1	11	7	0.14	17.9		504
MFG1_1 (N-GFP)	MFG1	3643884	XP_714447.2	4737	6278	30881	MFG1_1_BR1_IDA_TOF3_P50	30881_MFG1_1_BR1_IDA_TOF3_P50.wiff	CAALFM_CR09740WA	3639008	XP_719308	1		5	5	0.07	17		399
MFG1_1 (N-GFP)	MFG1	3643884	XP_714447.2	4737	6278	30881	MFG1_1_BR1_IDA_TOF3_P50	30881_MFG1_1_BR1_IDA_TOF3_P50.wiff	SIK1	3638925	XP_719331	1		347	29	4.89	65.1		516
MFG1_1 (N-GFP)	MFG1	3643884	XP_714447.2	4737	6278	30881	MFG1_1_BR1_IDA_TOF3_P50	30881_MFG1_1_BR1_IDA_TOF3_P50.wiff	ZCF39	3639037	XP_719345	1		3	3	0.04	7.2		681
MFG1_1 (N-GFP)	MFG1	3643884	XP_714447.2	4737	6278	30881	MFG1_1_BR1_IDA_TOF3_P50	30881_MFG1_1_BR1_IDA_TOF3_P50.wiff	UTP5	3638922	XP_719361	1		5	5	0.07	10.1		636
MFG1_1 (N-GFP)	MFG1	3643884	XP_714447.2	4737	6278	30881	MFG1_1_BR1_IDA_TOF3_P50	30881_MFG1_1_BR1_IDA_TOF3_P50.wiff	AHA1	3638933	XP_719364	1		6	5	0.07	15		346
MFG1_1 (N-GFP)	MFG1	3643884	XP_714447.2	4737	6278	30881	MFG1_1_BR1_IDA_TOF3_P50	30881_MFG1_1_BR1_IDA_TOF3_P50.wiff	TRX1	3638950	XP_719372	1		9	4	0.13	40.8		103
MFG1_1 (N-GFP)	MFG1	3643884	XP_714447.2	4737	6278	30881	MFG1_1_BR1_IDA_TOF3_P50	30881_MFG1_1_BR1_IDA_TOF3_P50.wiff	CAALFM_CR10470CA	3638979	XP_719385	1		3	3	0.04	7.3		531
MFG1_1 (N-GFP)	MFG1	3643884	XP_714447.2	4737	6278	30881	MFG1_1_BR1_IDA_TOF3_P50	30881_MFG1_1_BR1_IDA_TOF3_P50.wiff	EIF4E	3638981	XP_719387	1		4	3	0.06	15.3		209
MFG1_1 (N-GFP)	MFG1	3643884	XP_714447.2	4737	6278	30881	MFG1_1_BR1_IDA_TOF3_P50	30881_MFG1_1_BR1_IDA_TOF3_P50.wiff	CKA1	3639018	XP_719411	1		4	4	0.06	13		416
MFG1_1 (N-GFP)	MFG1	3643884	XP_714447.2	4737	6278	30881	MFG1_1_BR1_IDA_TOF3_P50	30881_MFG1_1_BR1_IDA_TOF3_P50.wiff	CAALFM_CR10750CA	3638942	XP_719423	1		5	2	0.07	18.7		134
MFG1_1 (N-GFP)	MFG1	3643884	XP_714447.2	4737	6278	30881	MFG1_1_BR1_IDA_TOF3_P50	30881_MFG1_1_BR1_IDA_TOF3_P50.wiff	SRP72	3639106	XP_719198	1	XP_719081.1	3	3	0.04	6.5		635
MFG1_1 (N-GFP)	MFG1	3643884	XP_714447.2	4737	6278	30881	MFG1_1_BR1_IDA_TOF3_P50	30881_MFG1_1_BR1_IDA_TOF3_P50.wiff	NAB3	3639067	XP_719211	1	XP_719094.1	5	4	0.06	8.3		836
MFG1_1 (N-GFP)	MFG1	3643884	XP_714447.2	4737	6278	30881	MFG1_1_BR1_IDA_TOF3_P50	30881_MFG1_1_BR1_IDA_TOF3_P50.wiff	MRT4	3639102	XP_719230	1	XP_719113.1	6	5	0.09	23.9		230
MFG1_1 (N-GFP)	MFG1	3643884	XP_714447.2	4737	6278	30881	MFG1_1_BR1_IDA_TOF3_P50	30881_MFG1_1_BR1_IDA_TOF3_P50.wiff	RNH12	3639090	XP_719243	1	XP_719126.1	7	6	0.1	20.7		232
MFG1_1 (N-GFP)	MFG1	3643884	XP_714447.2	4737	6278	30881	MFG1_1_BR1_IDA_TOF3_P50	30881_MFG1_1_BR1_IDA_TOF3_P50.wiff	SHE3	3639162	XP_719272	1	XP_719156.1	2	2	0.03	6.6		519
MFG1_1 (N-GFP)	MFG1	3643884	XP_714447.2	4737	6278	30881	MFG1_1_BR1_IDA_TOF3_P50	30881_MFG1_1_BR1_IDA_TOF3_P50.wiff	POL5	3639122	XP_719274	1	XP_719159.1	3	3	0.04	4.4		1055
MFG1_1 (N-GFP)	MFG1	3643884	XP_714447.2	4737	6278	30881	MFG1_1_BR1_IDA_TOF3_P50	30881_MFG1_1_BR1_IDA_TOF3_P50.wiff	RRS1	3639352	XP_718976	1	XP_718874.1	3	3	0.04	18		205
MFG1_1 (N-GFP)	MFG1	3643884	XP_714447.2	4737	6278	30881	MFG1_1_BR1_IDA_TOF3_P50	30881_MFG1_1_BR1_IDA_TOF3_P50.wiff	TUB2	3639329	XP_718996	1	XP_718894.1	14	8	0.19	31.7		303
MFG1_1 (N-GFP)	MFG1	3643884	XP_714447.2	4737	6278	30881	MFG1_1_BR1_IDA_TOF3_P50	30881_MFG1_1_BR1_IDA_TOF3_P50.wiff	TUF1	3639360	XP_719009	1	XP_718907.1	6	4	0.08	10.8		426
MFG1_1 (N-GFP)	MFG1	3643884	XP_714447.2	4737	6278	30881	MFG1_1_BR1_IDA_TOF3_P50	30881_MFG1_1_BR1_IDA_TOF3_P50.wiff	RPL16A	3639338	XP_719047	1	XP_718943.1	29	9	0.42	31.5		200
MFG1_1 (N-GFP)	MFG1	3643884	XP_714447.2	4737	6278	30881	MFG1_1_BR1_IDA_TOF3_P50	30881_MFG1_1_BR1_IDA_TOF3_P50.wiff	CAALFM_C100160CA	3639341	XP_719050	1	XP_718946.1	28	11	0.4	34.2		400
MFG1_1 (N-GFP)	MFG1	3643884	XP_714447.2	4737	6278	30881	MFG1_1_BR1_IDA_TOF3_P50	30881_MFG1_1_BR1_IDA_TOF3_P50.wiff	CCT8	3639324	XP_719058	1	XP_718954.1	5	5	0.06	12.2		540
MFG1_1 (N-GFP)	MFG1	3643884	XP_714447.2	4737	6278	30881	MFG1_1_BR1_IDA_TOF3_P50	30881_MFG1_1_BR1_IDA_TOF3_P50.wiff	DHH1	3639490	XP_718788	1	XP_718704.1	10	8	0.15	18.9		549
MFG1_1 (N-GFP)	MFG1	3643884	XP_714447.2	4737	6278	30881	MFG1_1_BR1_IDA_TOF3_P50	30881_MFG1_1_BR1_IDA_TOF3_P50.wiff	SUI2	3639569	XP_718803	1	XP_718720.1	5	4	0.07	19		300
MFG1_1 (N-GFP)	MFG1	3643884	XP_714447.2	4737	6278	30881	MFG1_1_BR1_IDA_TOF3_P50	30881_MFG1_1_BR1_IDA_TOF3_P50.wiff	CAALFM_C106600WA	3639513	XP_718839	1	XP_718753.1	2	2	0.03	7.2		347
MFG1_1 (N-GFP)	MFG1	3643884	XP_714447.2	4737	6278	30881	MFG1_1_BR1_IDA_TOF3_P50	30881_MFG1_1_BR1_IDA_TOF3_P50.wiff	RPS22A	3639551	XP_718852	1	XP_718767.1	21	7	0.29	63.8		130
MFG1_1 (N-GFP)	MFG1	3643884	XP_714447.2	4737	6278	30881	MFG1_1_BR1_IDA_TOF3_P50	30881_MFG1_1_BR1_IDA_TOF3_P50.wiff	ACC1	3639688	XP_718624	1		8	7	0.09	4.4		2271
MFG1_1 (N-GFP)	MFG1	3643884	XP_714447.2	4737	6278	30881	MFG1_1_BR1_IDA_TOF3_P50	30881_MFG1_1_BR1_IDA_TOF3_P50.wiff	MDH1	3639667	XP_718638	1		5	3	0.07	8.6		337
MFG1_1 (N-GFP)	MFG1	3643884	XP_714447.2	4737	6278	30881	MFG1_1_BR1_IDA_TOF3_P50	30881_MFG1_1_BR1_IDA_TOF3_P50.wiff	CAALFM_CR00490WA	3639723	XP_718642	1		3	2	0.04	10.6		293
MFG1_1 (N-GFP)	MFG1	3643884	XP_714447.2	4737	6278	30881	MFG1_1_BR1_IDA_TOF3_P50	30881_MFG1_1_BR1_IDA_TOF3_P50.wiff	CAALFM_CR00460CA	3639726	XP_718645	1		4	2	0.05	19.7		183
MFG1_1 (N-GFP)	MFG1	3643884	XP_714447.2	4737	6278	30881	MFG1_1_BR1_IDA_TOF3_P50	30881_MFG1_1_BR1_IDA_TOF3_P50.wiff	NAP1	3639714	XP_718658	1		5	2	0.05	8.7		435
MFG1_1 (N-GFP)	MFG1	3643884	XP_714447.2	4737	6278	30881	MFG1_1_BR1_IDA_TOF3_P50	30881_MFG1_1_BR1_IDA_TOF3_P50.wiff	KIN2	3639697	XP_718667	1		2	2	0.03	2		1212
MFG1_1 (N-GFP)	MFG1	3643884	XP_714447.2	4737	6278	30881	MFG1_1_BR1_IDA_TOF3_P50	30881_MFG1_1_BR1_IDA_TOF3_P50.wiff	CAALFM_CR00130CA	3639709	XP_718679	1		4	3	0.06	9.7		390
MFG1_1 (N-GFP)	MFG1	3643884	XP_714447.2	4737	6278	30881	MFG1_1_BR1_IDA_TOF3_P50	30881_MFG1_1_BR1_IDA_TOF3_P50.wiff	MIS12	3639669	XP_718690	1		3	3	0.04	3.6		1025
MFG1_1 (N-GFP)	MFG1	3643884	XP_714447.2	4737	6278	30881	MFG1_1_BR1_IDA_TOF3_P50	30881_MFG1_1_BR1_IDA_TOF3_P50.wiff	SSE1	3639813	XP_718541	1	XP_718458.1	9	8	0.13	13.8		701
MFG1_1 (N-GFP)	MFG1	3643884	XP_714447.2	4737	6278	30881	MFG1_1_BR1_IDA_TOF3_P50	30881_MFG1_1_BR1_IDA_TOF3_P50.wiff	KAP123	3639740	XP_718593	1	XP_718510.1	20	14	0.27	15.8		1109
MFG1_1 (N-GFP)	MFG1	3643884	XP_714447.2	4737	6278	30881	MFG1_1_BR1_IDA_TOF3_P50	30881_MFG1_1_BR1_IDA_TOF3_P50.wiff	BMS1	3639801	XP_718605	1	XP_718522.1	6	6	0.09	6.3		1210
MFG1_1 (N-GFP)	MFG1	3643884	XP_714447.2	4737	6278	30881	MFG1_1_BR1_IDA_TOF3_P50	30881_MFG1_1_BR1_IDA_TOF3_P50.wiff	ARP9	3639769	XP_718608	1	XP_718525.1	4	3	0.05	7.4		484
MFG1_1 (N-GFP)	MFG1	3643884	XP_714447.2	4737	6278	30881	MFG1_1_BR1_IDA_TOF3_P50	30881_MFG1_1_BR1_IDA_TOF3_P50.wiff	RPS2	3639967	XP_718427	1	XP_718157.1	15	6	0.21	34.9		249
MFG1_1 (N-GFP)	MFG1	3643884	XP_714447.2	4737	6278	30881	MFG1_1_BR1_IDA_TOF3_P50	30881_MFG1_1_BR1_IDA_TOF3_P50.wiff	MRP20	3639933	XP_718440	1	XP_718173.1	4	3	0.04	14.3		293
MFG1_1 (N-GFP)	MFG1	3643884	XP_714447.2	4737	6278	30881	MFG1_1_BR1_IDA_TOF3_P50	30881_MFG1_1_BR1_IDA_TOF3_P50.wiff	LYS12	3640064	XP_718292	1	XP_718193.1	3	2	0.04	6.4		376
MFG1_1 (N-GFP)	MFG1	3643884	XP_714447.2	4737	6278	30881	MFG1_1_BR1_IDA_TOF3_P50	30881_MFG1_1_BR1_IDA_TOF3_P50.wiff	MET6	3640000	XP_718315	1	XP_718219.1	3	3	0.04	5.2		767
MFG1_1 (N-GFP)	MFG1	3643884	XP_714447.2	4737	6278	30881	MFG1_1_BR1_IDA_TOF3_P50	30881_MFG1_1_BR1_IDA_TOF3_P50.wiff	CaO19.10096	3639978	XP_718327	1	XP_718231.1	11	7	0.13	18.5		287
MFG1_1 (N-GFP)	MFG1	3643884	XP_714447.2	4737	6278	30881	MFG1_1_BR1_IDA_TOF3_P50	30881_MFG1_1_BR1_IDA_TOF3_P50.wiff	CAALFM_C603550CA	3640246	XP_718060	1	XP_717994.1	4	4	0.06	10		539
MFG1_1 (N-GFP)	MFG1	3643884	XP_714447.2	4737	6278	30881	MFG1_1_BR1_IDA_TOF3_P50	30881_MFG1_1_BR1_IDA_TOF3_P50.wiff	NOG2	3640299	XP_718070	1	XP_718003.1	2	2	0.03	6.4		297
MFG1_1 (N-GFP)	MFG1	3643884	XP_714447.2	4737	6278	30881	MFG1_1_BR1_IDA_TOF3_P50	30881_MFG1_1_BR1_IDA_TOF3_P50.wiff	PWP2	3640416	XP_717966	1	XP_717900.1	6	5	0.09	5.9		922
MFG1_1 (N-GFP)	MFG1	3643884	XP_714447.2	4737	6278	30881	MFG1_1_BR1_IDA_TOF3_P50	30881_MFG1_1_BR1_IDA_TOF3_P50.wiff	PMA1	3640531	XP_717759	1	XP_717665.1	12	8	0.15	9.6		895
MFG1_1 (N-GFP)	MFG1	3643884	XP_714447.2	4737	6278	30881	MFG1_1_BR1_IDA_TOF3_P50	30881_MFG1_1_BR1_IDA_TOF3_P50.wiff	CAALFM_C300450CA	3640548	XP_717792	1	XP_717698.1	4	3	0.06	10.3		368
MFG1_1 (N-GFP)	MFG1	3643884	XP_714447.2	4737	6278	30881	MFG1_1_BR1_IDA_TOF3_P50	30881_MFG1_1_BR1_IDA_TOF3_P50.wiff	UTP8	3640547	XP_717808	1	XP_717714.1	5	5	0.07	7.5		720
MFG1_1 (N-GFP)	MFG1	3643884	XP_714447.2	4737	6278	30881	MFG1_1_BR1_IDA_TOF3_P50	30881_MFG1_1_BR1_IDA_TOF3_P50.wiff	RHR2	3640522	XP_717809	1	XP_717715.1	3	2	0.04	11.4		254
MFG1_1 (N-GFP)	MFG1	3643884	XP_714447.2	4737	6278	30881	MFG1_1_BR1_IDA_TOF3_P50	30881_MFG1_1_BR1_IDA_TOF3_P50.wiff	RPT2	3640525	XP_717812	1	XP_717718.1	3	3	0.04	7.5		465
MFG1_1 (N-GFP)	MFG1	3643884	XP_714447.2	4737	6278	30881	MFG1_1_BR1_IDA_TOF3_P50	30881_MFG1_1_BR1_IDA_TOF3_P50.wiff	RPS24	3640568	XP_717837	1	XP_717743.1	15	7	0.22	39.3		135
MFG1_1 (N-GFP)	MFG1	3643884	XP_714447.2	4737	6278	30881	MFG1_1_BR1_IDA_TOF3_P50	30881_MFG1_1_BR1_IDA_TOF3_P50.wiff	CAALFM_C107950CA	3640724	XP_717604	1	XP_717530.1	2	2	0.03	6.8		266
MFG1_1 (N-GFP)	MFG1	3643884	XP_714447.2	4737	6278	30881	MFG1_1_BR1_IDA_TOF3_P50	30881_MFG1_1_BR1_IDA_TOF3_P50.wiff	DPM1	3640700	XP_717611	1	XP_717537.1	2	2	0.03	10.9		239
MFG1_1 (N-GFP)	MFG1	3643884	XP_714447.2	4737	6278	30881	MFG1_1_BR1_IDA_TOF3_P50	30881_MFG1_1_BR1_IDA_TOF3_P50.wiff	PFY1	3640703	XP_717614	1	XP_717540.1	2	2	0.03	33.3		126
MFG1_1 (N-GFP)	MFG1	3643884	XP_714447.2	4737	6278	30881	MFG1_1_BR1_IDA_TOF3_P50	30881_MFG1_1_BR1_IDA_TOF3_P50.wiff	DRG1	3640714	XP_717620	1	XP_717546.1	4	4	0.06	16.6		368
MFG1_1 (N-GFP)	MFG1	3643884	XP_714447.2	4737	6278	30881	MFG1_1_BR1_IDA_TOF3_P50	30881_MFG1_1_BR1_IDA_TOF3_P50.wiff	CAALFM_C108110WA	3640716	XP_717622	1	XP_717548.1	10	9	0.13	12.6		1091
MFG1_1 (N-GFP)	MFG1	3643884	XP_714447.2	4737	6278	30881	MFG1_1_BR1_IDA_TOF3_P50	30881_MFG1_1_BR1_IDA_TOF3_P50.wiff	TKL1	3640767	XP_717648	1	XP_717574.1	4	4	0.06	7.7		677
MFG1_1 (N-GFP)	MFG1	3643884	XP_714447.2	4737	6278	30881	MFG1_1_BR1_IDA_TOF3_P50	30881_MFG1_1_BR1_IDA_TOF3_P50.wiff	MRPL40	3640861	XP_717436	1	XP_717347.1	4	4	0.06	11.2		338
MFG1_1 (N-GFP)	MFG1	3643884	XP_714447.2	4737	6278	30881	MFG1_1_BR1_IDA_TOF3_P50	30881_MFG1_1_BR1_IDA_TOF3_P50.wiff	MEX67	3640921	XP_717440	1	XP_717351.1	3	3	0.04	5		617
MFG1_1 (N-GFP)	MFG1	3643884	XP_714447.2	4737	6278	30881	MFG1_1_BR1_IDA_TOF3_P50	30881_MFG1_1_BR1_IDA_TOF3_P50.wiff	RPL15	3640926	XP_717445	1	XP_717356.1	18	7	0.26	36.3		204
MFG1_1 (N-GFP)	MFG1	3643884	XP_714447.2	4737	6278	30881	MFG1_1_BR1_IDA_TOF3_P50	30881_MFG1_1_BR1_IDA_TOF3_P50.wiff	NOP2	3640912	XP_717453	1	XP_717364.1	27	12	0.32	21.2		618
MFG1_1 (N-GFP)	MFG1	3643884	XP_714447.2	4737	6278	30881	MFG1_1_BR1_IDA_TOF3_P50	30881_MFG1_1_BR1_IDA_TOF3_P50.wiff	CAP001	3640882	XP_717457	1	XP_717368.1	3	3	0.04	6.8		545
MFG1_1 (N-GFP)	MFG1	3643884	XP_714447.2	4737	6278	30881	MFG1_1_BR1_IDA_TOF3_P50	30881_MFG1_1_BR1_IDA_TOF3_P50.wiff	YDJ1	3640883	XP_717458	1	XP_717369.1	10	6	0.11	29.3		393
MFG1_1 (N-GFP)	MFG1	3643884	XP_714447.2	4737	6278	30881	MFG1_1_BR1_IDA_TOF3_P50	30881_MFG1_1_BR1_IDA_TOF3_P50.wiff	CaO19.8143	3640848	XP_717465	1	XP_717375.1	21	15	0.29	20.7		1042
MFG1_1 (N-GFP)	MFG1	3643884	XP_714447.2	4737	6278	30881	MFG1_1_BR1_IDA_TOF3_P50	30881_MFG1_1_BR1_IDA_TOF3_P50.wiff	NHP2	3640872	XP_717481	1	XP_717389.1	44	5	0.63	26.4		159
MFG1_1 (N-GFP)	MFG1	3643884	XP_714447.2	4737	6278	30881	MFG1_1_BR1_IDA_TOF3_P50	30881_MFG1_1_BR1_IDA_TOF3_P50.wiff	SEC26	3640891	XP_717483	1	XP_717391.1	6	6	0.09	6.6		952
MFG1_1 (N-GFP)	MFG1	3643884	XP_714447.2	4737	6278	30881	MFG1_1_BR1_IDA_TOF3_P50	30881_MFG1_1_BR1_IDA_TOF3_P50.wiff	CDC10	3640905	XP_717505	1	XP_717411.1	2	2	0.03	8.4		357
MFG1_1 (N-GFP)	MFG1	3643884	XP_714447.2	4737	6278	30881	MFG1_1_BR1_IDA_TOF3_P50	30881_MFG1_1_BR1_IDA_TOF3_P50.wiff	RPL24	3641073	XP_717269	1	XP_717194.1	15	7	0.22	36.8		155
MFG1_1 (N-GFP)	MFG1	3643884	XP_714447.2	4737	6278	30881	MFG1_1_BR1_IDA_TOF3_P50	30881_MFG1_1_BR1_IDA_TOF3_P50.wiff	MRPL11	3641082	XP_717278	1	XP_717202.1	2	2	0.03	11.6		258
MFG1_1 (N-GFP)	MFG1	3643884	XP_714447.2	4737	6278	30881	MFG1_1_BR1_IDA_TOF3_P50	30881_MFG1_1_BR1_IDA_TOF3_P50.wiff	SSZ1	3641035	XP_717293	1	XP_717217.1	6	5	0.09	10.9		540
MFG1_1 (N-GFP)	MFG1	3643884	XP_714447.2	4737	6278	30881	MFG1_1_BR1_IDA_TOF3_P50	30881_MFG1_1_BR1_IDA_TOF3_P50.wiff	CaO19.11312	3641090	XP_717311	1	XP_717235.1	12	7	0.17	25		276
MFG1_1 (N-GFP)	MFG1	3643884	XP_714447.2	4737	6278	30881	MFG1_1_BR1_IDA_TOF3_P50	30881_MFG1_1_BR1_IDA_TOF3_P50.wiff	CaO19.5328	3641202	XP_717131	1	XP_717052.1	5	4	0.07	6.4		677
MFG1_1 (N-GFP)	MFG1	3643884	XP_714447.2	4737	6278	30881	MFG1_1_BR1_IDA_TOF3_P50	30881_MFG1_1_BR1_IDA_TOF3_P50.wiff	GCN1	3641256	XP_717136	1	XP_717057.1	7	7	0.1	5		1600
MFG1_1 (N-GFP)	MFG1	3643884	XP_714447.2	4737	6278	30881	MFG1_1_BR1_IDA_TOF3_P50	30881_MFG1_1_BR1_IDA_TOF3_P50.wiff	CAALFM_C703270WA	3641365	XP_716951	1	XP_716883.1; XP_888935.1	5	4	0.06	13.1		397
MFG1_1 (N-GFP)	MFG1	3643884	XP_714447.2	4737	6278	30881	MFG1_1_BR1_IDA_TOF3_P50	30881_MFG1_1_BR1_IDA_TOF3_P50.wiff	LMO1	3641403	XP_716970	1	XP_716903.1; XP_888916.1	4	3	0.06	5.2		521
MFG1_1 (N-GFP)	MFG1	3643884	XP_714447.2	4737	6278	30881	MFG1_1_BR1_IDA_TOF3_P50	30881_MFG1_1_BR1_IDA_TOF3_P50.wiff	PET9	3641531	XP_716829	1	XP_716769.1	27	12	0.38	44.9		301
MFG1_1 (N-GFP)	MFG1	3643884	XP_714447.2	4737	6278	30881	MFG1_1_BR1_IDA_TOF3_P50	30881_MFG1_1_BR1_IDA_TOF3_P50.wiff	NAM7	3641489	XP_716838	1	XP_716778.1	2	2	0.03	2		1019
MFG1_1 (N-GFP)	MFG1	3643884	XP_714447.2	4737	6278	30881	MFG1_1_BR1_IDA_TOF3_P50	30881_MFG1_1_BR1_IDA_TOF3_P50.wiff	SEC14	3641491	XP_716840	1	XP_716780.1	2	2	0.03	6.3		301
MFG1_1 (N-GFP)	MFG1	3643884	XP_714447.2	4737	6278	30881	MFG1_1_BR1_IDA_TOF3_P50	30881_MFG1_1_BR1_IDA_TOF3_P50.wiff	XDJ1	3641478	XP_716852	1	XP_716792.1	3	3	0.04	5.7		439
MFG1_1 (N-GFP)	MFG1	3643884	XP_714447.2	4737	6278	30881	MFG1_1_BR1_IDA_TOF3_P50	30881_MFG1_1_BR1_IDA_TOF3_P50.wiff	FAS1	3641494	XP_716877	1	XP_716817.1	13	13	0.18	7.9		2037
MFG1_1 (N-GFP)	MFG1	3643884	XP_714447.2	4737	6278	30881	MFG1_1_BR1_IDA_TOF3_P50	30881_MFG1_1_BR1_IDA_TOF3_P50.wiff	TIF3	3641646	XP_716731	1	XP_716672.1	4	3	0.06	6.8		455
MFG1_1 (N-GFP)	MFG1	3643884	XP_714447.2	4737	6278	30881	MFG1_1_BR1_IDA_TOF3_P50	30881_MFG1_1_BR1_IDA_TOF3_P50.wiff	ANB1	3641648	XP_716733	1	XP_716674.1	9	4	0.13	27.5		138
MFG1_1 (N-GFP)	MFG1	3643884	XP_714447.2	4737	6278	30881	MFG1_1_BR1_IDA_TOF3_P50	30881_MFG1_1_BR1_IDA_TOF3_P50.wiff	RCT1	3641727	XP_716591	1		2	2	0.03	23		191
MFG1_1 (N-GFP)	MFG1	3643884	XP_714447.2	4737	6278	30881	MFG1_1_BR1_IDA_TOF3_P50	30881_MFG1_1_BR1_IDA_TOF3_P50.wiff	NOG1	3641736	XP_716625	1		49	23	0.64	37.3		640
MFG1_1 (N-GFP)	MFG1	3643884	XP_714447.2	4737	6278	30881	MFG1_1_BR1_IDA_TOF3_P50	30881_MFG1_1_BR1_IDA_TOF3_P50.wiff	PBS2	3641748	XP_716629	1		2	2	0.03	3.5		545
[truncated: 2,747 more rows]

## Sheet: MassIVE_Table3
Bait Gene	Prey accession	Prey Gene	Spectra	Spec Sum	Avg Spec	Num Replicates	Spectral Counts Across Controls	AvgP	MaxP	logOddsScore	Fold Change	BFDR	Unique Spec	Unique Spec Sum	Unique Avg Spec	Prey Sequence Length	UniProtID
FLAG dataset on instrument AB SCIEX 5600 TripleTOF™ (SAINTexpress task 3869). Bait Gene is the Official Symbol (retrieved from NCBI). Prey Accession is the NCBI protein accession number; Prey Gene is as per NCBI Entrez Gene. Spectral counts for the prey (column D, separated by "I" delimiter; column E, summed, column F, averaged), number of replicates performed (column G), spectral counts for the …
Table 3: MassIVE SAINTexpress v.3.6.1 output (Elizabeth J. Polvi/AP-MS of Mfg1-GFP cells). Contains data associated with "AP-MS of Mfg1-GFP cells in untreated conditions, or in presence of serum at 37°C for 1 hour or 3 hours".Values for Mfg1, Flo8 and Mss11 are highlighted in yellow.
MFG1_untreat	XP_714496.1	MFG1	219|262	481	240.5	2	0|0|0|0|0|0	1	1	314.77	2405	0	219|262	481	240.5	758
MFG1_untreat	XP_721429.1	GSC1	122|126	248	124	2	0|0|0|0|0|0	1	1	177.84	1240	0	122|126	248	124	1897
MFG1_untreat	XP_712106.1	FLO8	61|89	150	75	2	0|0|0|0|0|0	1	1	91.26	750	0	61|89	150	75	817
MFG1_untreat	XP_712650.1	URA2	62|75	137	68.5	2	0|0|0|0|0|0	1	1	92.68	685	0	62|75	137	68.5	2216
MFG1_untreat	XP_720354.1	RPA135	33|53	86	43	2	6|4|2|5|2|11	1	1	10.38	5.06	0	33|53	86	43	1166
MFG1_untreat	XP_718624.1	ACC1	36|38	74	37	2	0|2|0|5|0|0	1	1	29.47	10.57	0	36|38	74	37	2271
MFG1_untreat	XP_711111.1	MSS11	31|39	70	35	2	0|0|0|0|0|0	1	1	48.18	350	0	31|39	70	35	640
MFG1_untreat	XP_712174.1	VMA2	28|35	63	31.5	2	4|5|6|9|0|7	1	1	9.16	3.94	0	28|35	63	31.5	512
MFG1_untreat	XP_716625.1	NOG1	22|28	50	25	2	7|7|4|4|4|7	1	1	5.08	3.57	0	22|28	50	25	640
MFG1_untreat	XP_723426.1	MSS116	21|25	46	23	2	5|2|0|0|4|9	0.99	1	4.56	3.29	0	21|25	46	23	668
MFG1_untreat	XP_711563.1	RPG1A	25|21	46	23	2	0|0|0|0|0|0	1	1	33.6	230	0	25|21	46	23	930
MFG1_untreat	XP_722620.1	CAALFM_C202540WA	17|28	45	22.5	2	0|2|0|2|0|3	1	1	12.13	9	0	17|28	45	22.5	1722
MFG1_untreat	XP_717136.1	GCN1	22|22	44	22	2	0|0|0|2|0|2	1	1	20.33	11	0	22|22	44	22	1600
MFG1_untreat	XP_720305.1	CAALFM_C701030CA	18|25	43	21.5	2	4|4|0|3|0|4	1	1	9.04	5.38	0	18|25	43	21.5	1217
MFG1_untreat	XP_710836.1	CHC1	16|26	42	21	2	0|3|0|6|0|0	1	1	5.44	4.67	0	16|26	42	21	1671
MFG1_untreat	XP_715016.1	CAALFM_C114080WA	19|18	37	18.5	2	0|0|0|0|0|0	1	1	29.17	185	0	19|18	37	18.5	1818
MFG1_untreat	XP_722031.1	HAS1	18|18	36	18	2	6|4|3|5|0|4	0.99	0.99	4.84	3.27	0	18|18	36	18	569
MFG1_untreat	XP_719058.1	CCT8	17|19	36	18	2	0|0|0|0|0|0	1	1	27.68	180	0	17|19	36	18	540
MFG1_untreat	XP_711904.1	GCR3	17|19	36	18	2	0|5|0|3|0|4	1	1	6.59	4	0	17|19	36	18	886
MFG1_untreat	XP_713696.1	CaO19.8649	12|20	32	16	2	5|0|0|0|0|0	0.96	0.99	2.57	6.4	0	12|20	32	16	849
MFG1_untreat	XP_716391.1	RPN2	12|17	29	14.5	2	0|0|0|0|0|0	1	1	20.18	145	0	12|17	29	14.5	952
MFG1_untreat	XP_715320.1	RNR1	10|19	29	14.5	2	0|0|0|0|0|0	1	1	17.12	145	0	10|19	29	14.5	854
MFG1_untreat	XP_714755.1	CCT7	14|15	29	14.5	2	2|0|0|0|0|2	1	1	10.24	7.25	0	14|15	29	14.5	549
MFG1_untreat	XP_712537.1	SEC27	8|19	27	13.5	2	0|0|0|2|0|0	0.99	1	4.09	13.5	0	8|19	27	13.5	939
MFG1_untreat	XP_717622.1	CAALFM_C108110WA	7|18	25	12.5	2	0|0|0|2|0|0	0.98	1	3.44	12.5	0	7|18	25	12.5	1091
MFG1_untreat	XP_710511.1	CAALFM_C500150CA	8|16	24	12	2	0|0|0|0|0|0	1	1	14.01	120	0	8|16	24	12	543
MFG1_untreat	XP_714488.1	RPT6	11|12	23	11.5	2	0|0|0|0|0|0	1	1	18.66	115	0	11|12	23	11.5	401
MFG1_untreat	XP_710816.1	CaO19.13272	11|11	22	11	2	0|3|0|2|0|3	0.98	0.98	4.01	3.67	0	11|11	22	11	714
MFG1_untreat	XP_723125.1	MAK21	8|14	22	11	2	0|0|0|0|0|0	1	1	14.01	110	0	8|14	22	11	1066
MFG1_untreat	XP_721055.1	NOP12	10|10	20	10	2	0|2|0|0|0|3	0.99	0.99	4.3	4	0	10|10	20	10	454
MFG1_untreat	XP_710417.1	NOP4	8|12	20	10	2	0|2|0|0|0|0	0.99	1	4.09	10	0	8|12	20	10	741
MFG1_untreat	XP_717131.1	CaO19.5328	7|12	19	9.5	2	0|0|0|0|0|0	1	1	12.43	95	0	7|12	19	9.5	677
MFG1_untreat	XP_716874.1	CaO19.8591	5|14	19	9.5	2	0|0|0|0|0|0	1	1	9.19	95	0	5|14	19	9.5	681
MFG1_untreat	XP_719361.1	UTP5	5|13	18	9	2	0|0|0|0|0|0	1	1	9.19	90	0	5|13	18	9	636
MFG1_untreat	XP_722611.1	UTP22	3|13	16	8	2	0|0|0|0|0|0	1	1	5.77	80	0	3|13	16	8	1175
MFG1_untreat	XP_715926.1	RPT1	7|9	16	8	2	0|0|0|0|0|0	1	1	12.43	80	0	7|9	16	8	444
MFG1_untreat	XP_715334.1	PR26	4|12	16	8	2	0|0|0|0|0|0	1	1	7.51	80	0	4|12	16	8	411
MFG1_untreat	XP_721377.1	RVB2	7|8	15	7.5	2	0|0|0|0|0|0	1	1	12.43	75	0	7|8	15	7.5	498
MFG1_untreat	XP_714693.1	DNM1	4|11	15	7.5	2	0|0|0|0|0|0	1	1	7.51	75	0	4|11	15	7.5	866
MFG1_untreat	XP_721638.1	TFP1	2|12	14	7	2	0|0|0|0|0|0	0.99	1	3.92	70	0	2|12	14	7	577
MFG1_untreat	XP_715342.1	RNR21	5|9	14	7	2	0|0|0|0|0|0	1	1	9.19	70	0	5|9	14	7	413
MFG1_untreat	XP_720704.1	CaO19.11744	4|9	13	6.5	2	0|0|0|0|0|0	1	1	7.51	65	0	4|9	13	6.5	799
MFG1_untreat	XP_718292.1	LYS12	5|8	13	6.5	2	0|0|0|0|0|0	1	1	9.19	65	0	5|8	13	6.5	376
MFG1_untreat	XP_720441.1	NAN1	3|9	12	6	2	0|0|0|0|0|0	1	1	5.77	60	0	3|9	12	6	839
MFG1_untreat	XP_717808.1	UTP8	5|7	12	6	2	0|0|0|0|0|0	1	1	9.19	60	0	5|7	12	6	720
MFG1_untreat	XP_717812.1	RPT2	3|9	12	6	2	0|0|0|0|0|0	1	1	5.77	60	0	3|9	12	6	465
MFG1_untreat	XP_715034.1	CAALFM_C114240WA	4|8	12	6	2	0|0|0|0|0|0	1	1	7.51	60	0	4|8	12	6	561
MFG1_untreat	XP_715001.1	ATP4	6|6	12	6	2	0|0|0|0|0|0	1	1	10.83	60	0	6|6	12	6	233
MFG1_untreat	K1C15_SHEEP	KRT15	7|5	12	6	2	0|0|0|0|0|0	1	1	9.19	60	0	7|5	12	6	453
MFG1_untreat	XP_720342.1	NOP15	3|8	11	5.5	2	0|0|0|0|0|0	1	1	5.77	55	0	3|8	11	5.5	267
MFG1_untreat	XP_719603.1	RFC5	3|8	11	5.5	2	0|0|0|0|0|0	1	1	5.77	55	0	3|8	11	5.5	362
MFG1_untreat	XP_716120.1	CAALFM_C306700CA	3|8	11	5.5	2	0|0|0|0|0|0	1	1	5.77	55	0	3|8	11	5.5	613
MFG1_untreat	XP_715508.1	RVB1	5|6	11	5.5	2	0|0|0|0|0|0	1	1	9.19	55	0	5|6	11	5.5	458
MFG1_untreat	XP_712370.1	LPD1	7|4	11	5.5	2	0|0|0|0|0|0	1	1	7.51	55	0	7|4	11	5.5	491
MFG1_untreat	XP_712188.1	CaO19.13969	5|6	11	5.5	2	0|0|0|0|0|0	1	1	9.19	55	0	5|6	11	5.5	759
MFG1_untreat	XP_712048.1	QCR2	5|6	11	5.5	2	0|0|0|0|0|0	1	1	9.19	55	0	5|6	11	5.5	374
MFG1_untreat	XP_720719.1	CaO19.11759	4|6	10	5	2	0|0|0|0|0|0	1	1	7.51	50	0	4|6	10	5	335
MFG1_untreat	XP_717966.1	PWP2	4|6	10	5	2	0|0|0|0|0|0	1	1	7.51	50	0	4|6	10	5	922
MFG1_untreat	XP_716026.1	NSA1	4|6	10	5	2	0|0|0|0|0|0	1	1	7.51	50	0	4|6	10	5	406
MFG1_untreat	XP_712793.1	NMD5	5|5	10	5	2	0|0|0|0|0|0	1	1	9.19	50	0	5|5	10	5	1017
MFG1_untreat	XP_711918.1	TCP1	2|8	10	5	2	0|0|0|0|0|0	0.99	1	3.92	50	0	2|8	10	5	554
MFG1_untreat	XP_710518.1	CAALFM_C500080CA	4|6	10	5	2	0|0|0|0|0|0	1	1	7.51	50	0	4|6	10	5	311
MFG1_untreat	XP_722279.1	RPN1	4|5	9	4.5	2	0|0|0|0|0|0	1	1	7.51	45	0	4|5	9	4.5	994
MFG1_untreat	XP_719411.1	CKA1	4|5	9	4.5	2	0|0|0|0|0|0	1	1	7.51	45	0	4|5	9	4.5	416
MFG1_untreat	XP_717434.1	RPT4	3|6	9	4.5	2	0|0|0|0|0|0	1	1	5.77	45	0	3|6	9	4.5	428
MFG1_untreat	XP_716629.1	PBS2	3|6	9	4.5	2	0|0|0|0|0|0	1	1	5.77	45	0	3|6	9	4.5	545
MFG1_untreat	XP_714877.1	CCT5	2|7	9	4.5	2	0|0|0|0|0|0	0.99	1	3.92	45	0	2|7	9	4.5	548
MFG1_untreat	XP_713829.1	SAM2	3|6	9	4.5	2	0|0|0|0|0|0	1	1	5.77	45	0	3|6	9	4.5	385
MFG1_untreat	XP_713859.1	GGC1	5|4	9	4.5	2	0|0|0|0|0|0	1	1	7.51	45	0	5|4	9	4.5	304
MFG1_untreat	XP_715374.1	CAALFM_C202720WA	3|6	9	4.5	2	0|0|0|0|0|0	1	1	5.77	45	0	3|6	9	4.5	1002
MFG1_untreat	XP_720673.1	RET2	3|5	8	4	2	0|0|0|0|0|0	1	1	5.77	40	0	3|5	8	4	573
MFG1_untreat	XP_720414.1	RVS161	3|5	8	4	2	0|0|0|0|0|0	1	1	5.77	40	0	3|5	8	4	293
MFG1_untreat	XP_719872.1	GCD2	3|5	8	4	2	0|0|0|0|0|0	1	1	5.77	40	0	3|5	8	4	500
MFG1_untreat	XP_712547.1	NIP7	4|4	8	4	2	0|0|0|0|0|0	1	1	7.51	40	0	4|4	8	4	262
MFG1_untreat	XP_710535.1	ENP1	2|6	8	4	2	0|0|0|0|0|0	0.99	1	3.92	40	0	2|6	8	4	475
MFG1_untreat	XP_718679.1	CAALFM_CR00130CA	2|6	8	4	2	0|0|0|0|0|0	0.99	1	3.92	40	0	2|6	8	4	390
MFG1_untreat	XP_715249.1	SLA2	3|5	8	4	2	0|0|0|0|0|0	1	1	5.77	40	0	3|5	8	4	1063
MFG1_untreat	XP_710495.1	VID27	2|6	8	4	2	0|0|0|0|0|0	0.99	1	3.92	40	0	2|6	8	4	745
MFG1_untreat	XP_721719.1	CAALFM_C302040CA	3|4	7	3.5	2	0|0|0|0|0|0	1	1	5.77	35	0	3|4	7	3.5	206
MFG1_untreat	XP_717816.1	TIM44	2|5	7	3.5	2	0|0|0|0|0|0	0.99	1	3.92	35	0	2|5	7	3.5	424
MFG1_untreat	XP_715719.1	CAALFM_C501140CA	3|4	7	3.5	2	0|0|0|0|0|0	1	1	5.77	35	0	3|4	7	3.5	753
MFG1_untreat	XP_715509.1	CaO19.10642	3|4	7	3.5	2	0|0|0|0|0|0	1	1	5.77	35	0	3|4	7	3.5	331
MFG1_untreat	XP_714521.1	RRP8	2|5	7	3.5	2	0|0|0|0|0|0	0.99	1	3.92	35	0	2|5	7	3.5	428
MFG1_untreat	XP_714402.1	GPD1	3|4	7	3.5	2	0|0|0|0|0|0	1	1	5.77	35	0	3|4	7	3.5	403
MFG1_untreat	XP_712788.1	YAP180	3|4	7	3.5	2	0|0|0|0|0|0	1	1	5.77	35	0	3|4	7	3.5	676
MFG1_untreat	XP_720349.1	GUS1	2|5	7	3.5	2	0|0|0|0|0|0	0.99	1	3.92	35	0	2|5	7	3.5	725
MFG1_untreat	XP_722804.1	HGH1	4|2	6	3	2	0|0|0|0|0|0	0.99	1	3.92	30	0	4|2	6	3	362
MFG1_untreat	XP_721362.1	TOM40	2|4	6	3	2	0|0|0|0|0|0	0.99	1	3.92	30	0	2|4	6	3	390
MFG1_untreat	XP_715811.1	RRP9	4|2	6	3	2	0|0|0|0|0|0	0.99	1	3.92	30	0	4|2	6	3	549
MFG1_untreat	XP_715203.1	UTP18	2|4	6	3	2	0|0|0|0|0|0	0.99	1	3.92	30	0	2|4	6	3	552
MFG1_untreat	XP_709940.1	RPN6	2|4	6	3	2	0|0|0|0|0|0	0.99	1	3.92	30	0	2|4	6	3	435
MFG1_untreat	XP_712474.1	DBP7	3|3	6	3	2	0|0|0|0|0|0	1	1	5.77	30	0	3|3	6	3	727
MFG1_untreat	XP_719379.1	CAALFM_CR10410CA	2|4	6	3	2	0|0|0|0|0|0	0.99	1	3.92	30	0	2|4	6	3	276
MFG1_untreat	XP_716758.1	TRA1	2|4	6	3	2	0|0|0|0|0|0	0.99	1	3.92	30	0	2|4	6	3	2284
MFG1_untreat	XP_721071.1	GCD7	3|2	5	2.5	2	0|0|0|0|0|0	0.99	1	3.92	25	0	3|2	5	2.5	365
MFG1_untreat	XP_720167.1	NDE1	2|3	5	2.5	2	0|0|0|0|0|0	0.99	1	3.92	25	0	2|3	5	2.5	574
MFG1_untreat	XP_719877.1	ZFU2	3|2	5	2.5	2	0|0|0|0|0|0	0.99	1	3.92	25	0	3|2	5	2.5	367
MFG1_untreat	XP_713993.1	UTP6	2|3	5	2.5	2	0|0|0|0|0|0	0.99	1	3.92	25	0	2|3	5	2.5	431
MFG1_untreat	XP_714485.1	IPP1	2|3	5	2.5	2	0|0|0|0|0|0	0.99	1	3.92	25	0	2|3	5	2.5	288
MFG1_untreat	XP_717630.1	CAALFM_C108160WA	2|3	5	2.5	2	0|0|0|0|0|0	0.99	1	3.92	25	0	2|3	5	2.5	352
MFG1_untreat	XP_722048.1	CaO19.11461	2|2	4	2	2	0|0|0|0|0|0	0.98	0.98	3.92	20	0	2|2	4	2	237
MFG1_untreat	XP_721306.1	CAALFM_C702460CA	2|2	4	2	2	0|0|0|0|0|0	0.98	0.98	3.92	20	0	2|2	4	2	425
MFG1_untreat	XP_710813.1	CaO19.13269	2|2	4	2	2	0|0|0|0|0|0	0.98	0.98	3.92	20	0	2|2	4	2	1157
MFG1_untreat	XP_715251.1	MRP7	2|2	4	2	2	0|0|0|0|0|0	0.98	0.98	3.92	20	0	2|2	4	2	389
MFG1_untreat	XP_721577.1	GFA1	17|25	42	21	2	0|0|0|0|0|8	0.95	0.97	2.39	5.25	0.01	17|25	42	21	713
MFG1_untreat	XP_714264.1	PES1	16|18	34	17	2	5|5|3|4|0|7	0.83	0.97	0.87	2.83	0.01	16|18	34	17	587
MFG1_untreat	XP_713604.1	SEC21	12|18	30	15	2	3|5|2|2|0|3	0.95	1	2.2	3.75	0.01	12|18	30	15	936
MFG1_untreat	XP_715712.1	VPS1	7|15	22	11	2	0|3|0|0|0|2	0.84	1	0.75	4.4	0.01	7|15	22	11	693
MFG1_untreat	XP_711924.1	GCD6	4|9	13	6.5	2	0|0|0|2|0|0	0.9	0.99	1.45	6.5	0.01	4|9	13	6.5	732
MFG1_untreat	XP_710768.1	TOM71	5|8	13	6.5	2	0|0|0|0|2|0	0.94	0.98	2.1	6.5	0.01	5|8	13	6.5	629
MFG1_untreat	XP_713775.1	CAALFM_C102240WA	7|5	12	6	2	0|0|0|2|0|0	0.93	0.97	2.1	6	0.01	7|5	12	6	875
MFG1_untreat	XP_722073.1	CCT3	6|5	11	5.5	2	0|0|0|2|0|0	0.92	0.94	2.1	5.5	0.01	6|5	11	5.5	529
MFG1_untreat	XP_716539.1	CAALFM_C107690CA	5|6	11	5.5	2	0|2|0|0|0|0	0.92	0.94	2.1	5.5	0.01	5|6	11	5.5	452
MFG1_untreat	XP_716860.1	CaO19.8577	5|5	10	5	2	0|0|0|0|0|2	0.89	0.89	2.1	5	0.01	5|5	10	5	177
MFG1_untreat	XP_715505.1	CCT6	5|5	10	5	2	0|0|0|2|0|0	0.89	0.89	2.1	5	0.01	5|5	10	5	559
MFG1_untreat	XP_711142.1	GLC7	5|4	9	4.5	2	0|0|0|2|0|0	0.85	0.89	1.45	4.5	0.01	5|4	9	4.5	330
MFG1_untreat	XP_718593.1	KAP123	26|39	65	32.5	2	5|6|5|10|0|10	0.83	1	0.65	3.25	0.02	26|39	65	32.5	1109
MFG1_untreat	XP_721692.1	ILV2	13|19	32	16	2	5|4|4|4|2|5	0.79	1	0.3	3.2	0.02	13|19	32	16	683
MFG1_untreat	XP_719881.1	RPS12	11|8	19	9.5	2	3|0|0|0|3|3	0.79	0.98	0.41	3.17	0.02	11|8	19	9.5	143
MFG1_untreat	XP_709976.1	CaO19.37	3|9	12	6	2	0|0|0|0|0|2	0.82	0.99	0.6	6	0.02	3|9	12	6	478
MFG1_untreat	XP_715187.1	SPT6	3|9	12	6	2	0|0|0|2|0|0	0.82	0.99	0.6	6	0.02	3|9	12	6	1401
MFG1_untreat	XP_721473.1	YKT6	3|7	10	5	2	0|0|0|2|0|0	0.81	0.97	0.6	5	0.02	3|7	10	5	200
MFG1_untreat	XP_713834.1	KRR1	3|7	10	5	2	0|0|0|0|0|2	0.81	0.97	0.6	5	0.02	3|7	10	5	358
MFG1_untreat	XP_711801.1	LSC2	4|4	8	4	2	0|0|0|0|0|2	0.81	0.81	1.45	4	0.02	4|4	8	4	120
MFG1_untreat	XP_710434.1	CAALFM_CR07080WA	3|5	8	4	2	0|0|0|2|0|0	0.77	0.89	0.6	4	0.02	3|5	8	4	245
MFG1_untreat	XP_710312.1	TRP5	5|13	18	9	2	0|0|2|2|2|0	0.73	1	-0.17	4.5	0.03	5|13	18	9	702
MFG1_untreat	XP_720470.1	CAALFM_C402780WA	5|12	17	8.5	2	0|0|0|4|0|0	0.72	0.96	-0.06	4.25	0.03	5|12	17	8.5	544
MFG1_untreat	XP_714974.1	RPF2	8|9	17	8.5	2	2|2|0|3|0|3	0.72	0.84	0.41	2.83	0.03	8|9	17	8.5	327
MFG1_untreat	XP_720420.1	RPF1	5|7	12	6	2	2|0|0|0|0|2	0.68	0.91	-0.17	3	0.03	5|7	12	6	296
MFG1_untreat	XP_718070.1	NOG2	2|10	12	6	2	2|0|0|0|0|0	0.68	1	-0.52	6	0.03	2|10	12	6	297
MFG1_untreat	XP_722333.1	MYO2	13|26	39	19.5	2	4|3|0|7|0|2	0.61	1	-1.32	3.55	0.04	13|26	39	19.5	1561
MFG1_untreat	XP_717483.1	SEC26	7|11	18	9	2	0|2|0|4|0|2	0.64	0.98	-0.87	3	0.04	7|11	18	9	952
MFG1_untreat	XP_723100.1	CAALFM_C304370CA	6|18	24	12	2	0|0|0|0|0|6	0.56	0.97	-1.77	4	0.05	6|18	24	12	1120
MFG1_untreat	XP_719009.1	TUF1	14|9	23	11.5	2	0|2|0|2|4|4	0.58	0.99	-1.56	2.88	0.05	14|9	23	11.5	426
MFG1_untreat	XP_714962.1	MAK5	6|14	20	10	2	0|3|0|0|0|3	0.55	1	-2.18	3.33	0.05	6|14	20	10	782
MFG1_untreat	XP_714986.1	RPC40	7|9	16	8	2	0|3|0|2|2|3	0.57	0.84	-0.87	2.67	0.05	7|9	16	8	369
MFG1_untreat	XP_721738.1	DBP5	6|18	24	12	2	2|3|2|4|2|2	0.51	1	-3.88	3.43	0.06	6|18	24	12	540
MFG1_untreat	XP_719395.1	DRS1	5|12	17	8.5	2	4|2|0|0|0|2	0.51	0.99	-3.54	2.83	0.06	5|12	17	8.5	613
MFG1_untreat	XP_711056.1	CaO19.11188	3|9	12	6	2	0|2|0|2|0|0	0.52	0.99	-2.87	3	0.06	3|9	12	6	606
MFG1_untreat	XP_715626.1	CaO19.10434	11|22	33	16.5	2	4|5|3|3|2|6	0.51	1	-3.92	3	0.07	11|22	33	16.5	526
MFG1_untreat	XP_718645.1	CAALFM_CR00460CA	2|3	5	2.5	2	0|0|0|2|0|0	0.51	0.64	-0.52	2.5	0.07	2|3	5	2.5	183
MFG1_untreat	XP_718354.1	RPA43	3|2	5	2.5	2	0|0|0|0|0|2	0.51	0.64	-0.52	2.5	0.07	3|2	5	2.5	299
MFG1_untreat	XP_710761.1	RPA190	35|46	81	40.5	2	4|13|2|9|4|18	0.5	1	-5.67	2.61	0.08	35|46	81	40.5	1665
MFG1_untreat	XP_721749.1	CAALFM_C301720CA	11|34	45	22.5	2	0|8|0|6|0|2	0.5	1	-9.02	3.21	0.08	11|34	45	22.5	1221
MFG1_untreat	XP_718996.1	TUB2	14|25	39	19.5	2	4|5|5|8|0|7	0.5	1	-6.64	2.6	0.08	14|25	39	19.5	303
MFG1_untreat	XP_722036.1	PFK1	5|14	19	9.5	2	0|0|0|3|4|0	0.5	1	-5.27	2.71	0.08	5|14	19	9.5	987
MFG1_untreat	XP_712670.1	URA2	0|75	75	37.5	2	6|8|0|11|0|12	0.5	1	-49.77	3.26	0.09	0|75	75	37.5	2216
MFG1_untreat	XP_711094.1	MSS11	0|40	40	20	2	0|0|0|0|0|0	0.5	1	-0.61	200	0.09	0|40	40	20	637
MFG1_untreat	XP_718605.1	BMS1	0|15	15	7.5	2	0|0|0|0|0|0	0.5	1	-0.61	75	0.1	0|15	15	7.5	1210
MFG1_untreat	XP_713205.1	CaO19.9458	0|11	11	5.5	2	0|0|0|0|0|0	0.5	1	-0.61	55	0.1	0|11	11	5.5	562
MFG1_untreat	XP_713710.1	HHT1	0|11	11	5.5	2	0|0|0|0|0|0	0.5	1	-0.61	55	0.1	0|11	11	5.5	136
MFG1_untreat	XP_712192.1	DBP8	0|10	10	5	2	0|0|0|0|0|0	0.5	1	-0.61	50	0.1	0|10	10	5	440
MFG1_untreat	XP_714345.1	TRA1	0|10	10	5	2	0|0|0|0|0|0	0.5	1	-0.61	50	0.1	0|10	10	5	1498
MFG1_untreat	XP_722328.1	DIM1	0|9	9	4.5	2	0|0|0|0|0|0	0.5	1	-0.61	45	0.11	0|9	9	4.5	326
MFG1_untreat	XP_722762.1	MDN1	0|9	9	4.5	2	0|0|0|0|0|0	0.5	1	-0.61	45	0.11	0|9	9	4.5	5037
MFG1_untreat	XP_717405.1	HXK2	8|0	8	4	2	0|0|0|0|0|0	0.5	1	-0.61	40	0.11	8|0	8	4	484
MFG1_untreat	XP_719580.1	NIC96	0|8	8	4	2	0|0|0|0|0|0	0.5	1	-0.61	40	0.11	0|8	8	4	960
MFG1_untreat	XP_718976.1	RRS1	0|8	8	4	2	0|0|0|0|0|0	0.5	1	-0.61	40	0.11	0|8	8	4	205
MFG1_untreat	XP_715543.1	CAALFM_C406470WA	0|8	8	4	2	0|0|0|0|0|0	0.5	1	-0.61	40	0.11	0|8	8	4	204
MFG1_untreat	XP_714055.1	CaO19.7771	7|0	7	3.5	2	0|0|0|0|0|0	0.5	1	-0.61	35	0.12	7|0	7	3.5	393
MFG1_untreat	XP_718589.1	NUP170	0|7	7	3.5	2	0|0|0|0|0|0	0.5	1	-0.61	35	0.12	0|7	7	3.5	1426
MFG1_untreat	XP_715245.1	CAALFM_C703850WA	0|7	7	3.5	2	0|0|0|0|0|0	0.5	1	-0.61	35	0.12	0|7	7	3.5	745
MFG1_untreat	XP_722608.1	UTP21	0|6	6	3	2	0|0|0|0|0|0	0.5	1	-0.61	30	0.12	0|6	6	3	942
MFG1_untreat	XP_721710.1	UTP4	0|6	6	3	2	0|0|0|0|0|0	0.5	1	-0.61	30	0.12	0|6	6	3	743
MFG1_untreat	XP_720313.1	YML6	0|6	6	3	2	0|0|0|0|0|0	0.5	1	-0.61	30	0.12	0|6	6	3	278
MFG1_untreat	XP_719810.1	UTP9	0|6	6	3	2	0|0|0|0|0|0	0.5	1	-0.61	30	0.12	0|6	6	3	445
MFG1_untreat	XP_719894.1	SSN6	0|6	6	3	2	0|0|0|0|0|0	0.5	1	-0.61	30	0.12	0|6	6	3	1080
MFG1_untreat	XP_719385.1	CAALFM_CR10470CA	0|6	6	3	2	0|0|0|0|0|0	0.5	1	-0.61	30	0.12	0|6	6	3	531
MFG1_untreat	XP_719303.1	CaO19.13072	0|6	6	3	2	0|0|0|0|0|0	0.5	1	-0.61	30	0.12	0|6	6	3	369
MFG1_untreat	XP_716949.1	CaO19.5126	0|6	6	3	2	0|0|0|0|0|0	0.5	1	-0.61	30	0.12	0|6	6	3	184
MFG1_untreat	XP_715471.1	CaO19.10603	0|6	6	3	2	0|0|0|0|0|0	0.5	1	-0.61	30	0.12	0|6	6	3	1432
MFG1_untreat	XP_714855.1	CAALFM_C207100WA	0|6	6	3	2	0|0|0|0|0|0	0.5	1	-0.61	30	0.12	0|6	6	3	469
MFG1_untreat	XP_714491.1	TIF46	0|6	6	3	2	0|0|0|0|0|0	0.5	1	-0.61	30	0.12	0|6	6	3	617
MFG1_untreat	XP_720128.1	DLD2	0|5	5	2.5	2	0|0|0|0|0|0	0.5	1	-0.61	25	0.13	0|5	5	2.5	527
MFG1_untreat	XP_716441.1	CAALFM_CR09110CA	0|5	5	2.5	2	0|0|0|0|0|0	0.5	1	-0.61	25	0.13	0|5	5	2.5	285
MFG1_untreat	XP_715202.1	CAALFM_C704200CA	0|5	5	2.5	2	0|0|0|0|0|0	0.5	1	-0.61	25	0.13	0|5	5	2.5	1025
MFG1_untreat	XP_714973.1	NUP133	0|5	5	2.5	2	0|0|0|0|0|0	0.5	1	-0.61	25	0.13	0|5	5	2.5	1032
MFG1_untreat	XP_714667.1	CCT2	0|5	5	2.5	2	0|0|0|0|0|0	0.5	1	-0.61	25	0.13	0|5	5	2.5	526
MFG1_untreat	XP_713171.1	CaO19.9424	0|5	5	2.5	2	0|0|0|0|0|0	0.5	1	-0.61	25	0.13	0|5	5	2.5	394
MFG1_untreat	XP_712139.1	ENP2	0|5	5	2.5	2	0|0|0|0|0|0	0.5	1	-0.61	25	0.13	0|5	5	2.5	750
MFG1_untreat	XP_712097.1	CDC39	0|5	5	2.5	2	0|0|0|0|0|0	0.5	1	-0.61	25	0.13	0|5	5	2.5	2016
MFG1_untreat	XP_719472.1	HGT7	0|5	5	2.5	2	0|0|0|0|0|0	0.5	1	-0.61	25	0.13	0|5	5	2.5	546
MFG1_untreat	XP_716301.1	CSI2	0|5	5	2.5	2	0|0|0|0|0|0	0.5	1	-0.61	25	0.13	0|5	5	2.5	292
MFG1_untreat	XP_714915.1	CAALFM_C205270WA	0|5	5	2.5	2	0|0|0|0|0|0	0.5	1	-0.61	25	0.13	0|5	5	2.5	948
MFG1_untreat	XP_716466.1	ELF1	17|34	51	25.5	2	5|9|5|14|0|5	0.5	1	-16.16	2.22	0.15	17|34	51	25.5	1195
MFG1_untreat	XP_713973.1	CaO19.9846	4|0	4	2	2	0|0|0|0|0|0	0.5	1	-0.61	20	0.15	4|0	4	2	281
MFG1_untreat	XP_720068.1	STH1	0|4	4	2	2	0|0|0|0|0|0	0.5	1	-0.61	20	0.15	0|4	4	2	1303
MFG1_untreat	XP_717968.1	GSY1	0|4	4	2	2	0|0|0|0|0|0	0.5	1	-0.61	20	0.15	0|4	4	2	661
MFG1_untreat	XP_717779.1	SOF1	0|4	4	2	2	0|0|0|0|0|0	0.5	1	-0.61	20	0.15	0|4	4	2	436
MFG1_untreat	XP_717587.1	CAALFM_C107790CA	0|4	4	2	2	0|0|0|0|0|0	0.5	1	-0.61	20	0.15	0|4	4	2	309
MFG1_untreat	XP_717602.1	MRPL3	0|4	4	2	2	0|0|0|0|0|0	0.5	1	-0.61	20	0.15	0|4	4	2	404
MFG1_untreat	XP_715502.1	RPT5	0|4	4	2	2	0|0|0|0|0|0	0.5	1	-0.61	20	0.15	0|4	4	2	454
MFG1_untreat	XP_713112.1	RGD2	0|4	4	2	2	0|0|0|0|0|0	0.5	1	-0.61	20	0.15	0|4	4	2	879
MFG1_untreat	XP_711499.1	GUF1	0|4	4	2	2	0|0|0|0|0|0	0.5	1	-0.61	20	0.15	0|4	4	2	654
MFG1_untreat	XP_711291.1	SSF1	0|4	4	2	2	0|0|0|0|0|0	0.5	1	-0.61	20	0.15	0|4	4	2	377
MFG1_untreat	XP_710869.1	RRP6	0|4	4	2	2	0|0|0|0|0|0	0.5	1	-0.61	20	0.15	0|4	4	2	786
MFG1_untreat	XP_710480.1	MPP10	0|4	4	2	2	0|0|0|0|0|0	0.5	1	-0.61	20	0.15	0|4	4	2	567
MFG1_untreat	XP_710448.1	UTP20	0|4	4	2	2	0|0|0|0|0|0	0.5	1	-0.61	20	0.15	0|4	4	2	1197
MFG1_untreat	XP_716762.1	THR1	0|4	4	2	2	0|0|0|0|0|0	0.5	1	-0.61	20	0.15	0|4	4	2	357
MFG1_untreat	XP_711493.1	CaO19.12932	0|4	4	2	2	0|0|0|0|0|0	0.5	1	-0.61	20	0.15	0|4	4	2	778
MFG1_untreat	XP_721552.1	RPN3	0|4	4	2	2	0|0|0|0|0|0	0.5	1	-0.61	20	0.15	0|4	4	2	481
MFG1_untreat	XP_718071.1	NOG2	3|0	3	1.5	2	0|0|0|0|0|0	0.5	1	-0.61	15	0.18	3|0	3	1.5	175
MFG1_untreat	XP_717526.1	ADE5,7	3|0	3	1.5	2	0|0|0|0|0|0	0.5	1	-0.61	15	0.18	3|0	3	1.5	802
MFG1_untreat	XP_723446.1	CAALFM_C109040CA	0|3	3	1.5	2	0|0|0|0|0|0	0.5	1	-0.61	15	0.18	0|3	3	1.5	487
MFG1_untreat	XP_723521.1	CAALFM_C109710CA	0|3	3	1.5	2	0|0|0|0|0|0	0.5	1	-0.61	15	0.18	0|3	3	1.5	527
MFG1_untreat	XP_723109.1	RIP1	0|3	3	1.5	2	0|0|0|0|0|0	0.5	1	-0.61	15	0.18	0|3	3	1.5	158
MFG1_untreat	XP_722111.1	CaO19.11525	0|3	3	1.5	2	0|0|0|0|0|0	0.5	1	-0.61	15	0.18	0|3	3	1.5	752
MFG1_untreat	XP_721513.1	ARX1	0|3	3	1.5	2	0|0|0|0|0|0	0.5	1	-0.61	15	0.18	0|3	3	1.5	564
MFG1_untreat	XP_721395.1	CAALFM_C701650WA	0|3	3	1.5	2	0|0|0|0|0|0	0.5	1	-0.61	15	0.18	0|3	3	1.5	306
MFG1_untreat	XP_720665.1	CaO19.11703	0|3	3	1.5	2	0|0|0|0|0|0	0.5	1	-0.61	15	0.18	0|3	3	1.5	327
MFG1_untreat	XP_720698.1	JSN1	0|3	3	1.5	2	0|0|0|0|0|0	0.5	1	-0.61	15	0.18	0|3	3	1.5	492
MFG1_untreat	XP_720334.1	CAALFM_C700780WA	0|3	3	1.5	2	0|0|0|0|0|0	0.5	1	-0.61	15	0.18	0|3	3	1.5	764
MFG1_untreat	XP_719668.1	ARO8	0|3	3	1.5	2	0|0|0|0|0|0	0.5	1	-0.61	15	0.18	0|3	3	1.5	491
MFG1_untreat	XP_718807.1	PGA63	0|3	3	1.5	2	0|0|0|0|0|0	0.5	1	-0.61	15	0.18	0|3	3	1.5	1265
MFG1_untreat	XP_718820.1	MRPL19	0|3	3	1.5	2	0|0|0|0|0|0	0.5	1	-0.61	15	0.18	0|3	3	1.5	143
MFG1_untreat	XP_718635.1	CAALFM_CR00570WA	0|3	3	1.5	2	0|0|0|0|0|0	0.5	1	-0.61	15	0.18	0|3	3	1.5	510
MFG1_untreat	XP_718638.1	MDH1	0|3	3	1.5	2	0|0|0|0|0|0	0.5	1	-0.61	15	0.18	0|3	3	1.5	337
MFG1_untreat	XP_718640.1	CRM1	0|3	3	1.5	2	0|0|0|0|0|0	0.5	1	-0.61	15	0.18	0|3	3	1.5	1079
MFG1_untreat	XP_718668.1	CAALFM_CR00230WA	0|3	3	1.5	2	0|0|0|0|0|0	0.5	1	-0.61	15	0.18	0|3	3	1.5	1847
MFG1_untreat	XP_718694.1	CAALFM_CR00060CA	0|3	3	1.5	2	0|0|0|0|0|0	0.5	1	-0.61	15	0.18	0|3	3	1.5	618
MFG1_untreat	XP_717604.1	CAALFM_C107950CA	0|3	3	1.5	2	0|0|0|0|0|0	0.5	1	-0.61	15	0.18	0|3	3	1.5	266
MFG1_untreat	XP_717653.1	OLE1	0|3	3	1.5	2	0|0|0|0|0|0	0.5	1	-0.61	15	0.18	0|3	3	1.5	486
MFG1_untreat	XP_717258.1	IMG2	0|3	3	1.5	2	0|0|0|0|0|0	0.5	1	-0.61	15	0.18	0|3	3	1.5	123
MFG1_untreat	XP_717291.1	MTD1	0|3	3	1.5	2	0|0|0|0|0|0	0.5	1	-0.61	15	0.18	0|3	3	1.5	323
MFG1_untreat	XP_717153.1	CAALFM_C210700CA	0|3	3	1.5	2	0|0|0|0|0|0	0.5	1	-0.61	15	0.18	0|3	3	1.5	290
MFG1_untreat	XP_716410.1	MRPL51	0|3	3	1.5	2	0|0|0|0|0|0	0.5	1	-0.61	15	0.18	0|3	3	1.5	140
MFG1_untreat	XP_716007.1	VMA5	0|3	3	1.5	2	0|0|0|0|0|0	0.5	1	-0.61	15	0.18	0|3	3	1.5	388
MFG1_untreat	XP_715139.1	SGD1	0|3	3	1.5	2	0|0|0|0|0|0	0.5	1	-0.61	15	0.18	0|3	3	1.5	1011
MFG1_untreat	XP_714502.1	CaO19.11092	0|3	3	1.5	2	0|0|0|0|0|0	0.5	1	-0.61	15	0.18	0|3	3	1.5	423
MFG1_untreat	XP_713620.1	CaO19.8395	0|3	3	1.5	2	0|0|0|0|0|0	0.5	1	-0.61	15	0.18	0|3	3	1.5	195
MFG1_untreat	XP_713300.1	CaO19.9952	0|3	3	1.5	2	0|0|0|0|0|0	0.5	1	-0.61	15	0.18	0|3	3	1.5	322
MFG1_untreat	XP_711916.1	YPK2	0|3	3	1.5	2	0|0|0|0|0|0	0.5	1	-0.61	15	0.18	0|3	3	1.5	712
MFG1_untreat	XP_711650.1	MRPL151	0|3	3	1.5	2	0|0|0|0|0|0	0.5	1	-0.61	15	0.18	0|3	3	1.5	220
MFG1_untreat	XP_710574.1	SCS2	0|3	3	1.5	2	0|0|0|0|0|0	0.5	1	-0.61	15	0.18	0|3	3	1.5	369
MFG1_untreat	XP_710527.1	CAALFM_C500030WA	0|3	3	1.5	2	0|0|0|0|0|0	0.5	1	-0.61	15	0.18	0|3	3	1.5	269
MFG1_untreat	XP_710282.1	CAALFM_C204870CA	0|3	3	1.5	2	0|0|0|0|0|0	0.5	1	-0.61	15	0.18	0|3	3	1.5	1608
MFG1_untreat	XP_710002.1	RRP15	0|3	3	1.5	2	0|0|0|0|0|0	0.5	1	-0.61	15	0.18	0|3	3	1.5	255
MFG1_untreat	XP_718858.1	CAALFM_C106400CA	0|3	3	1.5	2	0|0|0|0|0|0	0.5	1	-0.61	15	0.18	0|3	3	1.5	710
MFG1_untreat	XP_716483.1	CaO19.8815	0|3	3	1.5	2	0|0|0|0|0|0	0.5	1	-0.61	15	0.18	0|3	3	1.5	534
MFG1_untreat	XP_714020.1	ILV5	0|3	3	1.5	2	0|0|0|0|0|0	0.5	1	-0.61	15	0.18	0|3	3	1.5	400
MFG1_untreat	XP_717921.1	BOI2	0|3	3	1.5	2	0|0|0|0|0|0	0.5	1	-0.61	15	0.18	0|3	3	1.5	1172
MFG1_untreat	XP_719414.1	RPO21	0|3	3	1.5	2	0|0|0|0|0|0	0.5	1	-0.61	15	0.18	0|3	3	1.5	1728
MFG1_untreat	XP_720328.1	RFC2	0|3	3	1.5	2	0|0|0|0|0|0	0.5	1	-0.61	15	0.18	0|3	3	1.5	363
MFG1_untreat	XP_722350.1	YBP1	0|3	3	1.5	2	0|0|0|0|0|0	0.5	1	-0.61	15	0.18	0|3	3	1.5	665
MFG1_untreat	XP_710682.1	RPL3	52|36	88	44	2	17|11|14|21|15|10	0.49	0.99	-15.96	2.32	0.22	52|36	88	44	389
MFG1_untreat	XP_721712.1	RPL12	20|29	49	24.5	2	5|7|9|11|8|7	0.49	0.99	-7.05	2.45	0.22	20|29	49	24.5	165
MFG1_untreat	XP_717458.1	YDJ1	5|18	23	11.5	2	2|3|4|7|0|3	0.5	0.99	-12.31	2.09	0.22	5|18	23	11.5	393
MFG1_untreat	XP_715369.1	CAALFM_C202770WA	0|10	10	5	2	0|2|0|2|0|0	0.5	1	-7.84	2.5	0.22	0|10	10	5	717
MFG1_untreat	XP_714330.1	CIC1	0|9	9	4.5	2	2|2|0|0|2|2	0.49	0.99	-7.84	2.25	0.22	0|9	9	4.5	365
MFG1_untreat	XP_722158.1	CAALFM_C113190WA	2|0	2	1	2	0|0|0|0|0|0	0.49	0.98	-0.61	10	0.23	2|0	2	1	169
MFG1_untreat	XP_720658.1	CaO19.11695	2|0	2	1	2	0|0|0|0|0|0	0.49	0.98	-0.61	10	0.23	2|0	2	1	827
MFG1_untreat	XP_716840.1	SEC14	2|0	2	1	2	0|0|0|0|0|0	0.49	0.98	-0.61	10	0.23	2|0	2	1	301
MFG1_untreat	XP_714978.1	CaO19.11040	2|0	2	1	2	0|0|0|0|0|0	0.49	0.98	-0.61	10	0.23	2|0	2	1	699
MFG1_untreat	XP_714990.1	CaO19.11052	2|0	2	1	2	0|0|0|0|0|0	0.49	0.98	-0.61	10	0.23	2|0	2	1	518
MFG1_untreat	XP_711914.1	MRPL28	2|0	2	1	2	0|0|0|0|0|0	0.49	0.98	-0.61	10	0.23	2|0	2	1	147
MFG1_untreat	XP_711272.1	YHM2	2|0	2	1	2	0|0|0|0|0|0	0.49	0.98	-0.61	10	0.23	2|0	2	1	301
MFG1_untreat	XP_718439.1	RPB140	2|0	2	1	2	0|0|0|0|0|0	0.49	0.98	-0.61	10	0.23	2|0	2	1	1234
MFG1_untreat	XP_722577.1	CAALFM_C202170WA	2|0	2	1	2	0|0|0|0|0|0	0.49	0.98	-0.61	10	0.23	2|0	2	1	458
MFG1_untreat	XP_715053.1	RPC10	2|0	2	1	2	0|0|0|0|0|0	0.49	0.98	-0.61	10	0.23	2|0	2	1	102
MFG1_untreat	XP_716021.1	CAALFM_C208020CA	2|0	2	1	2	0|0|0|0|0|0	0.49	0.98	-0.61	10	0.23	2|0	2	1	371
MFG1_untreat	XP_723159.1	SEC7	0|2	2	1	2	0|0|0|0|0|0	0.49	0.98	-0.61	10	0.23	0|2	2	1	1839
MFG1_untreat	XP_722834.1	POL30	0|2	2	1	2	0|0|0|0|0|0	0.49	0.98	-0.61	10	0.23	0|2	2	1	259
MFG1_untreat	XP_722047.1	CaO19.11460	0|2	2	1	2	0|0|0|0|0|0	0.49	0.98	-0.61	10	0.23	0|2	2	1	369
MFG1_untreat	XP_722105.1	APM1	0|2	2	1	2	0|0|0|0|0|0	0.49	0.98	-0.61	10	0.23	0|2	2	1	438
MFG1_untreat	XP_721463.1	CAALFM_C102750CA	0|2	2	1	2	0|0|0|0|0|0	0.49	0.98	-0.61	10	0.23	0|2	2	1	795
MFG1_untreat	XP_721068.1	CaO19.8442	0|2	2	1	2	0|0|0|0|0|0	0.49	0.98	-0.61	10	0.23	0|2	2	1	189
MFG1_untreat	XP_721146.1	ROM2	0|2	2	1	2	0|0|0|0|0|0	0.49	0.98	-0.61	10	0.23	0|2	2	1	1381
MFG1_untreat	XP_719862.1	NOP13	0|2	2	1	2	0|0|0|0|0|0	0.49	0.98	-0.61	10	0.23	0|2	2	1	396
MFG1_untreat	XP_719572.1	RPN9	0|2	2	1	2	0|0|0|0|0|0	0.49	0.98	-0.61	10	0.23	0|2	2	1	416
MFG1_untreat	XP_719595.1	MRPL16	0|2	2	1	2	0|0|0|0|0|0	0.49	0.98	-0.61	10	0.23	0|2	2	1	213
MFG1_untreat	XP_718642.1	CAALFM_CR00490WA	0|2	2	1	2	0|0|0|0|0|0	0.49	0.98	-0.61	10	0.23	0|2	2	1	293
MFG1_untreat	XP_718643.1	MRPL6	0|2	2	1	2	0|0|0|0|0|0	0.49	0.98	-0.61	10	0.23	0|2	2	1	233
MFG1_untreat	XP_718608.1	ARP9	0|2	2	1	2	0|0|0|0|0|0	0.49	0.98	-0.61	10	0.23	0|2	2	1	484
MFG1_untreat	XP_718428.1	CaO19.10846	0|2	2	1	2	0|0|0|0|0|0	0.49	0.98	-0.61	10	0.23	0|2	2	1	200
MFG1_untreat	XP_718371.1	MCM6	0|2	2	1	2	0|0|0|0|0|0	0.49	0.98	-0.61	10	0.23	0|2	2	1	880
MFG1_untreat	XP_718106.1	PBP2	0|2	2	1	2	0|0|0|0|0|0	0.49	0.98	-0.61	10	0.23	0|2	2	1	529
MFG1_untreat	XP_717914.1	ATP3	0|2	2	1	2	0|0|0|0|0|0	0.49	0.98	-0.61	10	0.23	0|2	2	1	153
MFG1_untreat	XP_717942.1	ARC19	0|2	2	1	2	0|0|0|0|0|0	0.49	0.98	-0.61	10	0.23	0|2	2	1	119
MFG1_untreat	XP_717278.1	MRPL11	0|2	2	1	2	0|0|0|0|0|0	0.49	0.98	-0.61	10	0.23	0|2	2	1	258
MFG1_untreat	XP_716962.1	CAALFM_C703160WA	0|2	2	1	2	0|0|0|0|0|0	0.49	0.98	-0.61	10	0.23	0|2	2	1	745
MFG1_untreat	XP_716819.1	RMT2	0|2	2	1	2	0|0|0|0|0|0	0.49	0.98	-0.61	10	0.23	0|2	2	1	412
MFG1_untreat	XP_716832.1	CaO19.8548	0|2	2	1	2	0|0|0|0|0|0	0.49	0.98	-0.61	10	0.23	0|2	2	1	169
MFG1_untreat	XP_716701.1	ADK12	0|2	2	1	2	0|0|0|0|0|0	0.49	0.98	-0.61	10	0.23	0|2	2	1	249
MFG1_untreat	XP_716604.1	KRE6	0|2	2	1	2	0|0|0|0|0|0	0.49	0.98	-0.61	10	0.23	0|2	2	1	740
MFG1_untreat	XP_716541.1	ADE4	0|2	2	1	2	0|0|0|0|0|0	0.49	0.98	-0.61	10	0.23	0|2	2	1	541
MFG1_untreat	XP_716425.1	CAALFM_CR08930CA	0|2	2	1	2	0|0|0|0|0|0	0.49	0.98	-0.61	10	0.23	0|2	2	1	167
MFG1_untreat	XP_715246.1	CAALFM_C703840WA	0|2	2	1	2	0|0|0|0|0|0	0.49	0.98	-0.61	10	0.23	0|2	2	1	331
MFG1_untreat	XP_714631.1	TIM23	0|2	2	1	2	0|0|0|0|0|0	0.49	0.98	-0.61	10	0.23	0|2	2	1	218
MFG1_untreat	XP_714417.1	CAALFM_C210090CA	0|2	2	1	2	0|0|0|0|0|0	0.49	0.98	-0.61	10	0.23	0|2	2	1	984
MFG1_untreat	XP_713293.1	DPS1	0|2	2	1	2	0|0|0|0|0|0	0.49	0.98	-0.61	10	0.23	0|2	2	1	578
MFG1_untreat	XP_713183.1	HEM15	0|2	2	1	2	0|0|0|0|0|0	0.49	0.98	-0.61	10	0.23	0|2	2	1	386
MFG1_untreat	XP_712954.1	CAALFM_C101940CA	0|2	2	1	2	0|0|0|0|0|0	0.49	0.98	-0.61	10	0.23	0|2	2	1	168
MFG1_untreat	XP_712767.1	CaO19.11639	0|2	2	1	2	0|0|0|0|0|0	0.49	0.98	-0.61	10	0.23	0|2	2	1	1072
MFG1_untreat	XP_712756.1	HBR3	0|2	2	1	2	0|0|0|0|0|0	0.49	0.98	-0.61	10	0.23	0|2	2	1	466
MFG1_untreat	XP_712545.1	HRR25	0|2	2	1	2	0|0|0|0|0|0	0.49	0.98	-0.61	10	0.23	0|2	2	1	433
MFG1_untreat	XP_711973.1	CAALFM_C104040CA	0|2	2	1	2	0|0|0|0|0|0	0.49	0.98	-0.61	10	0.23	0|2	2	1	525
MFG1_untreat	XP_711116.1	RPB8	0|2	2	1	2	0|0|0|0|0|0	0.49	0.98	-0.61	10	0.23	0|2	2	1	148
MFG1_untreat	XP_722862.1	BEM1	0|2	2	1	2	0|0|0|0|0|0	0.49	0.98	-0.61	10	0.23	0|2	2	1	630
MFG1_untreat	XP_719274.1	POL5	0|2	2	1	2	0|0|0|0|0|0	0.49	0.98	-0.61	10	0.23	0|2	2	1	1055
MFG1_untreat	XP_711230.1	MRPS5	0|2	2	1	2	0|0|0|0|0|0	0.49	0.98	-0.61	10	0.23	0|2	2	1	336
MFG1_untreat	XP_710764.1	TOM22	0|2	2	1	2	0|0|0|0|0|0	0.49	0.98	-0.61	10	0.23	0|2	2	1	150
MFG1_untreat	XP_713449.1	CaO19.11208	0|2	2	1	2	0|0|0|0|0|0	0.49	0.98	-0.61	10	0.23	0|2	2	1	269
MFG1_untreat	XP_710962.1	RFC3	0|2	2	1	2	0|0|0|0|0|0	0.49	0.98	-0.61	10	0.23	0|2	2	1	361
MFG1_untreat	XP_713853.1	TIM50	0|2	2	1	2	0|0|0|0|0|0	0.49	0.98	-0.61	10	0.23	0|2	2	1	469
MFG1_untreat	XP_719417.1	RFC4	0|2	2	1	2	0|0|0|0|0|0	0.49	0.98	-0.61	10	0.23	0|2	2	1	323
MFG1_untreat	XP_718440.1	MRP20	0|2	2	1	2	0|0|0|0|0|0	0.49	0.98	-0.61	10	0.23	0|2	2	1	293
MFG1_untreat	XP_711962.1	CAALFM_C103940WA	0|2	2	1	2	0|0|0|0|0|0	0.49	0.98	-0.61	10	0.23	0|2	2	1	169
MFG1_untreat	XP_715366.1	NCB2	0|2	2	1	2	0|0|0|0|0|0	0.49	0.98	-0.61	10	0.23	0|2	2	1	149
MFG1_untreat	XP_717436.1	MRPL40	0|2	2	1	2	0|0|0|0|0|0	0.49	0.98	-0.61	10	0.23	0|2	2	1	338
MFG1_untreat	XP_720178.1	PRE9	0|2	2	1	2	0|0|0|0|0|0	0.49	0.98	-0.61	10	0.23	0|2	2	1	251
MFG1_untreat	XP_713204.1	MCM3	0|2	2	1	2	0|0|0|0|0|0	0.49	0.98	-0.61	10	0.23	0|2	2	1	878
MFG1_untreat	XP_717643.1	DIP2	0|2	2	1	2	0|0|0|0|0|0	0.49	0.98	-0.61	10	0.23	0|2	2	1	981
MFG1_untreat	XP_712597.1	CAALFM_C208930WA	0|2	2	1	2	0|0|0|0|0|0	0.49	0.98	-0.61	10	0.23	0|2	2	1	277
MFG1_untreat	XP_720156.1	MSL5	0|2	2	1	2	0|0|0|0|0|0	0.49	0.98	-0.61	10	0.23	0|2	2	1	455
MFG1_untreat	XP_714082.1	ISW1	0|2	2	1	2	0|0|0|0|0|0	0.49	0.98	-0.61	10	0.23	0|2	2	1	859
MFG1_untreat	XP_719845.1	CAALFM_C307420WA	0|2	2	1	2	0|0|0|0|0|0	0.49	0.98	-0.61	10	0.23	0|2	2	1	328
MFG1_untreat	XP_711793.1	ECM32	0|2	2	1	2	0|0|0|0|0|0	0.49	0.98	-0.61	10	0.23	0|2	2	1	1105
MFG1_untreat	XP_717783.1	CAALFM_C300520WA	0|2	2	1	2	0|0|0|0|0|0	0.49	0.98	-0.61	10	0.23	0|2	2	1	194
MFG1_untreat	XP_712928.1	CAALFM_C204500WA	0|2	2	1	2	0|0|0|0|0|0	0.49	0.98	-0.61	10	0.23	0|2	2	1	1915
MFG1_untreat	XP_712372.1	MRPL8	0|2	2	1	2	0|0|0|0|0|0	0.49	0.98	-0.61	10	0.23	0|2	2	1	255
MFG1_untreat	XP_715911.1	CaO19.8056	0|2	2	1	2	0|0|0|0|0|0	0.49	0.98	-0.61	10	0.23	0|2	2	1	684
MFG1_untreat	XP_710514.1	THS1	0|2	2	1	2	0|0|0|0|0|0	0.49	0.98	-0.61	10	0.23	0|2	2	1	706
MFG1_untreat	XP_713977.1	CaO19.9850	0|2	2	1	2	0|0|0|0|0|0	0.49	0.98	-0.61	10	0.23	0|2	2	1	135
MFG1_untreat	XP_710755.1	CBF5	72|85	157	78.5	2	21|27|28|29|36|27	0.47	0.95	-13.59	2.42	0.29	72|85	157	78.5	479
MFG1_untreat	XP_718427.1	RPS2	23|19	42	21	2	5|7|5|10|3|7	0.44	0.84	-3.4	2.47	0.29	23|19	42	21	249
MFG1_untreat	XP_721378.1	PFK2	15|20	35	17.5	2	0|4|0|9|4|2	0.45	0.85	-2.9	2.69	0.29	15|20	35	17.5	946
MFG1_untreat	XP_712916.1	RPL17B	14|10	24	12	2	5|4|5|5|4|3	0.43	0.82	-3.58	2.4	0.29	14|10	24	12	185
MFG1_untreat	XP_712918.1	CAALFM_C204570WA	11|9	20	10	2	4|3|0|0|2|4	0.45	0.73	-1.56	2.5	0.29	11|9	20	10	426
MFG1_untreat	XP_716703.1	CAALFM_C601890CA	8|12	20	10	2	2|3|0|3|0|5	0.48	0.9	-2.88	2.5	0.29	8|12	20	10	574
MFG1_untreat	XP_719364.1	AHA1	7|8	15	7.5	2	3|3|0|3|0|0	0.45	0.6	-0.87	2.5	0.29	7|8	15	7.5	346
MFG1_untreat	XP_721688.1	CAALFM_C302350WA	3|9	12	6	2	0|0|0|2|2|3	0.48	0.96	-4.62	2.4	0.29	3|9	12	6	666
MFG1_untreat	XP_716534.1	CaO19.1226	2|9	11	5.5	2	0|0|0|3|0|2	0.48	0.96	-6.1	2.2	0.29	2|9	11	5.5	531
MFG1_untreat	XP_714720.1	ACH1	4|6	10	5	2	0|0|0|4|0|0	0.47	0.67	-1.03	2.5	0.29	4|6	10	5	524
MFG1_untreat	XP_714654.1	CaO19.8966	2|7	9	4.5	2	2|0|0|0|0|2	0.46	0.91	-4.32	2.25	0.29	2|7	9	4.5	218
MFG1_untreat	XP_713399.1	CaO19.13116	0|7	7	3.5	2	0|0|0|3|0|0	0.45	0.9	-5.57	2.33	0.29	0|7	7	3.5	811
MFG1_untreat	XP_711060.1	YHB1	0|6	6	3	2	0|0|0|0|0|3	0.42	0.85	-5.57	2	0.29	0|6	6	3	398
MFG1_untreat	XP_711424.1	MDJ1	0|5	5	2.5	2	0|0|0|2|0|0	0.45	0.89	-3.41	2.5	0.29	0|5	5	2.5	488
MFG1_untreat	XP_711742.1	CaO19.10294	11|15	26	13	2	0|5|0|5|2|6	0.39	0.77	-3.92	2.36	0.3	11|15	26	13	665
MFG1_untreat	XP_712104.1	NOP8	7|15	22	11	2	2|2|3|5|0|6	0.38	0.77	-9.42	2	0.3	7|15	22	11	690
MFG1_untreat	XP_716446.1	ERG13	12|9	21	10.5	2	3|4|3|5|2|4	0.35	0.65	-3.23	2.33	0.3	12|9	21	10.5	451
MFG1_untreat	XP_713375.1	SUB2	6|8	14	7	2	0|0|0|3|3|0	0.35	0.6	-2.18	2.33	0.3	6|8	14	7	290
MFG1_untreat	XP_722858.1	PWP1	4|7	11	5.5	2	0|2|0|3|0|2	0.36	0.68	-3.2	2.2	0.3	4|7	11	5.5	612
MFG1_untreat	XP_710229.1	SPB1	4|7	11	5.5	2	0|0|0|0|0|5	0.33	0.58	-2.51	2.2	0.3	4|7	11	5.5	853
MFG1_untreat	XP_715236.1	MAM33	5|4	9	4.5	2	0|0|0|0|4|0	0.37	0.48	-1.03	2.25	0.3	5|4	9	4.5	264
MFG1_untreat	XP_716363.1	BRX1	6|0	6	3	2	0|2|0|0|0|2	0.37	0.75	-7.84	1.5	0.3	6|0	6	3	292
MFG1_untreat	XP_712154.1	DED81	4|2	6	3	2	0|0|0|3|0|0	0.34	0.57	-2.04	2	0.3	4|2	6	3	552
MFG1_untreat	XP_718658.1	NAP1	0|6	6	3	2	0|0|0|4|0|0	0.34	0.67	-7.25	1.5	0.3	0|6	6	3	435
MFG1_untreat	XP_722517.1	COX13	2|2	4	2	2	0|0|0|0|2|0	0.37	0.37	-0.52	2	0.3	2|2	4	2	134
MFG1_untreat	XP_719920.1	CAALFM_C306760WA	2|2	4	2	2	0|0|0|0|0|2	0.37	0.37	-0.52	2	0.3	2|2	4	2	275
MFG1_untreat	XP_716970.1	LMO1	0|4	4	2	2	0|0|0|2|0|0	0.41	0.81	-3.41	2	0.3	0|4	4	2	521
MFG1_untreat	XP_712533.1	LSG1	0|4	4	2	2	0|0|0|2|0|0	0.41	0.81	-3.41	2	0.3	0|4	4	2	684
MFG1_untreat	XP_712153.1	CAALFM_C703660CA	0|4	4	2	2	0|0|0|2|0|0	0.41	0.81	-3.41	2	0.3	0|4	4	2	691
MFG1_untreat	XP_719198.1	SRP72	0|3	3	1.5	2	0|0|0|2|0|0	0.32	0.64	-3.41	1.5	0.3	0|3	3	1.5	635
MFG1_untreat	XP_717440.1	MEX67	0|3	3	1.5	2	0|0|0|2|0|0	0.32	0.64	-3.41	1.5	0.3	0|3	3	1.5	617
MFG1_untreat	XP_716456.1	CAALFM_CR09240CA	0|3	3	1.5	2	0|0|0|0|2|0	0.32	0.64	-3.41	1.5	0.3	0|3	3	1.5	147
MFG1_untreat	XP_712849.1	RFC1	0|3	3	1.5	2	0|0|0|2|0|0	0.32	0.64	-3.41	1.5	0.3	0|3	3	1.5	688
MFG1_untreat	XP_712796.1	RLP24	0|3	3	1.5	2	2|0|0|0|0|0	0.32	0.64	-3.41	1.5	0.3	0|3	3	1.5	209
MFG1_untreat	XP_717453.1	NOP2	7|9	16	8	2	4|0|0|0|0|3	0.29	0.52	-2.53	2.29	0.31	7|9	16	8	618
MFG1_untreat	XP_723445.1	COX5	3|7	10	5	2	0|0|0|0|5|0	0.3	0.58	-3.87	2	0.31	3|7	10	5	165
MFG1_untreat	XP_715036.1	TIF35	2|8	10	5	2	0|2|0|3|3|0	0.3	0.6	-7.83	1.67	0.31	2|8	10	5	279
MFG1_untreat	XP_714648.1	SUP35	2|7	9	4.5	2	0|0|0|5|0|0	0.29	0.58	-5.53	1.8	0.31	2|7	9	4.5	721
MFG1_untreat	XP_713866.1	GPD2	2|3	5	2.5	2	0|0|0|3|0|0	0.22	0.33	-2.04	1.67	0.31	2|3	5	2.5	371
MFG1_untreat	XP_715476.1	PDA1	0|5	5	2.5	2	0|0|0|0|4|0	0.24	0.48	-7.25	1.25	0.31	0|5	5	2.5	401
MFG1_untreat	XP_722291.1	KEM1	6|20	26	13	2	4|8|3|8|0|3	0.19	0.38	-19.78	1.62	0.32	6|20	26	13	1469
MFG1_untreat	XP_719593.1	RPA49	15|11	26	13	2	4|7|0|5|0|3	0.2	0.4	-5.61	2.17	0.32	15|11	26	13	393
MFG1_untreat	XP_723501.1	YTM1	12|11	23	11.5	2	5|2|0|3|5|3	0.18	0.27	-2.26	2.3	0.32	12|11	23	11.5	466
MFG1_untreat	XP_722503.1	SPT5	6|15	21	10.5	2	3|5|0|7|0|0	0.2	0.4	-12.62	1.75	0.32	6|15	21	10.5	956
MFG1_untreat	XP_714401.1	SET2	0|10	10	5	2	0|3|3|5|0|3	0.22	0.43	-16.52	1.25	0.32	0|10	10	5	844
MFG1_untreat	XP_710661.1	SUI1	2|0	2	1	2	0|0|0|0|2|0	0.19	0.37	-3.41	1	0.32	2|0	2	1	109
MFG1_untreat	XP_722085.1	COR1	0|2	2	1	2	0|0|0|2|0|0	0.19	0.37	-3.41	1	0.32	0|2	2	1	439
MFG1_untreat	XP_718840.1	CAALFM_C106590CA	0|2	2	1	2	0|0|0|2|0|0	0.19	0.37	-3.41	1	0.32	0|2	2	1	400
MFG1_untreat	XP_712961.1	CYS4	0|2	2	1	2	0|0|0|0|2|0	0.19	0.37	-3.41	1	0.32	0|2	2	1	496
MFG1_untreat	XP_721059.1	CaO19.8433	5|7	12	6	2	3|3|0|3|2|3	0.16	0.3	-3.54	2	0.33	5|7	12	6	692
MFG1_untreat	XP_718690.1	MIS12	3|7	10	5	2	0|0|0|6|0|0	0.15	0.3	-5.6	1.67	0.33	3|7	10	5	1025
MFG1_untreat	XP_719308.1	CAALFM_CR09740WA	2|7	9	4.5	2	0|3|0|3|0|0	0.15	0.3	-7.83	1.5	0.33	2|7	9	4.5	399
MFG1_untreat	XP_719230.1	MRT4	4|3	7	3.5	2	2|0|0|0|2|0	0.12	0.18	-2.87	1.75	0.33	4|3	7	3.5	230
MFG1_untreat	XP_715699.1	SNF1	0|3	3	1.5	2	0|0|0|3|0|0	0.16	0.33	-5.57	1	0.33	0|3	3	1.5	618
MFG1_untreat	XP_712585.1	CAALFM_C209040WA	0|3	3	1.5	2	0|0|0|0|3|0	0.16	0.33	-5.57	1	0.33	0|3	3	1.5	193
MFG1_untreat	XP_712099.1	CAALFM_C604290WA	0|3	3	1.5	2	0|0|0|3|0|0	0.16	0.33	-5.57	1	0.33	0|3	3	1.5	622
MFG1_untreat	XP_722704.1	RPL20B	33|22	55	27.5	2	8|13|9|14|12|11	0.07	0.15	-16.2	2.04	0.34	33|22	55	27.5	172
MFG1_untreat	XP_719690.1	NDT801	12|23	35	17.5	2	8|10|9|8|7|9	0.09	0.18	-16.28	1.84	0.34	12|23	35	17.5	504
MFG1_untreat	XP_718788.1	DHH1	11|13	24	12	2	0|5|2|6|0|2	0.12	0.21	-3.92	2.18	0.34	11|13	24	12	549
MFG1_untreat	XP_441054.1	RPL7	10|9	19	9.5	2	4|0|0|0|3|5	0.08	0.13	-3.23	2.11	0.34	10|9	19	9.5	295
MFG1_untreat	XP_719905.1	TPD3	2|9	11	5.5	2	0|3|2|5|0|0	0.09	0.17	-11.62	1.38	0.34	2|9	11	5.5	643
MFG1_untreat	XP_441044.1	CAALFM_CR06060WA	0|4	4	2	2	0|2|0|2|0|0	0.09	0.18	-7.84	1	0.34	0|4	4	2	257
MFG1_untreat	XP_710381.1	SLB2	4|10	14	7	2	0|0|0|9|0|0	0.05	0.11	-9.33	1.56	0.35	4|10	14	7	317
MFG1_untreat	XP_711509.1	GSP1	6|5	11	5.5	2	3|0|2|3|2|2	0.06	0.1	-3.54	1.83	0.35	6|5	11	5.5	214
MFG1_untreat	XP_718448.1	LSC1	2|3	5	2.5	2	0|0|0|0|4|0	0.06	0.1	-3.73	1.25	0.35	2|3	5	2.5	323
MFG1_untreat	XP_723175.1	ARF2	0|5	5	2.5	2	0|2|0|3|0|0	0.07	0.14	-10.07	1	0.35	0|5	5	2.5	181
MFG1_untreat	XP_717002.1	PRX1	2|0	2	1	2	0|0|0|0|3|0	0.06	0.12	-5.57	0.67	0.35	2|0	2	1	243
MFG1_untreat	XP_722781.1	CaO19.12032	11|18	29	14.5	2	7|4|7|6|3|9	0.02	0.05	-12.47	1.81	0.36	11|18	29	14.5	371
MFG1_untreat	XP_718756.1	RPS23	9|9	18	9	2	3|4|3|4|0|5	0.04	0.04	-3.23	2	0.36	9|9	18	9	145
MFG1_untreat	XP_712942.1	CAALFM_C204370WA	6|8	14	7	2	0|2|0|6|0|0	0.03	0.05	-5.42	1.75	0.36	6|8	14	7	410
MFG1_untreat	XP_717809.1	RHR2	2|3	5	2.5	2	0|2|0|2|0|2	0.03	0.05	-4.32	1.25	0.36	2|3	5	2.5	254
MFG1_untreat	XP_711515.1	MAK16	0|3	3	1.5	2	2|0|0|0|0|2	0.03	0.05	-7.84	0.75	0.36	0|3	3	1.5	315
MFG1_untreat	XP_710498.1	HET1	0|3	3	1.5	2	0|0|0|0|4|0	0.05	0.1	-7.25	0.75	0.36	0|3	3	1.5	197
MFG1_untreat	XP_720769.1	RPS5	14|11	25	12.5	2	4|5|5|7|6|6	0.02	0.04	-7.3	1.92	0.37	14|11	25	12.5	225
MFG1_untreat	XP_716951.1	CAALFM_C703270WA	7|2	9	4.5	2	0|0|0|0|8|0	0.01	0.03	-10.68	1.12	0.37	7|2	9	4.5	397
MFG1_untreat	XP_714864.1	CAALFM_C207190CA	2|3	5	2.5	2	0|0|0|0|5|0	0.01	0.02	-5.53	1	0.37	2|3	5	2.5	174
MFG1_untreat	XP_721742.1	MNT1	0|5	5	2.5	2	0|0|0|3|3|0	0.01	0.03	-12.15	0.83	0.37	0|5	5	2.5	431
MFG1_untreat	XP_721698.1	CAALFM_C302260CA	0|4	4	2	2	0|0|2|3|0|0	0.02	0.04	-10.07	0.8	0.37	0|4	4	2	586
MFG1_untreat	XP_716442.1	TUB1	19|19	38	19	2	5|7|8|10|0|5	0.01	0.01	-5.04	2.11	0.38	19|19	38	19	323
MFG1_untreat	XP_723201.1	CAALFM_C305160CA	8|16	24	12	2	5|6|0|5|0|9	0.01	0.02	-15	1.6	0.38	8|16	24	12	908
MFG1_untreat	XP_719243.1	RNH12	4|7	11	5.5	2	3|0|0|5|0|3	0.01	0.01	-8.47	1.38	0.38	4|7	11	5.5	232
MFG1_untreat	XP_719068.1	TUP1	4|3	7	3.5	2	0|0|0|0|6|0	0.01	0.02	-5.6	1.17	0.38	4|3	7	3.5	514
MFG1_untreat	XP_712672.1	CaO19.9898	0|6	6	3	2	2|4|3|2|2|3	0.01	0.02	-14.39	0.86	0.38	0|6	6	3	281
MFG1_untreat	XP_716146.1	HSP104	0|3	3	1.5	2	0|0|0|5|0|0	0.01	0.02	-9.5	0.6	0.38	0|3	3	1.5	899
MFG1_untreat	XP_719345.1	ZCF39	0|2	2	1	2	0|2|0|2|0|0	0.01	0.01	-7.84	0.5	0.38	0|2	2	1	681
MFG1_untreat	XP_712844.1	CaO19.14175	0|2	2	1	2	0|0|0|2|0|2	0.01	0.01	-7.84	0.5	0.38	0|2	2	1	416
MFG1_untreat	XP_713270.1	CaO19.9922	0|2	2	1	2	0|2|0|2|0|0	0.01	0.01	-7.84	0.5	0.38	0|2	2	1	247
MFG1_untreat	XP_717465.1	CaO19.8143	11|18	29	14.5	2	4|8|2|9|0|0	0	0.01	-14.21	1.71	0.39	11|18	29	14.5	1042
MFG1_untreat	XP_713680.1	FPR3	12|17	29	14.5	2	8|8|4|8|4|6	0.01	0.01	-11.08	1.81	0.39	12|17	29	14.5	428
MFG1_untreat	XP_721086.1	RPL21	13|10	23	11.5	2	5|4|4|8|5|4	0	0.01	-8.68	1.77	0.39	13|10	23	11.5	109
MFG1_untreat	XP_888925.1	CaJ7_0366	8|6	14	7	2	2|0|0|0|6|3	0.01	0.01	-7.34	1.56	0.39	8|6	14	7	105
MFG1_untreat	XP_723571.1	CAALFM_C110190WA	6|6	12	6	2	2|3|2|5|2|3	0	0	-5.61	1.5	0.39	6|6	12	6	277
MFG1_untreat	XP_721511.1	CDC12	2|4	6	3	2	0|2|0|4|0|0	0	0.01	-7.83	1	0.39	2|4	6	3	370
MFG1_untreat	XP_722018.1	YTA7	0|4	4	2	2	4|2|0|0|0|0	0	0.01	-12.15	0.67	0.39	0|4	4	2	1314
MFG1_untreat	XP_711631.1	RPG1	25|21	46	23	2	4|5|5|16|2|0	0	0	-8.84	2.19	0.4	25|21	46	23	930
MFG1_untreat	XP_722520.1	RPS26A	11|15	26	13	2	5|6|6|9|5|5	0	0	-10.74	1.73	0.4	11|15	26	13	119
MFG1_untreat	XP_711917.1	CaO19.8030	4|5	9	4.5	2	2|4|2|2|0|3	0	0.01	-6.7	1.29	0.4	4|5	9	4.5	245
MFG1_untreat	XP_715584.1	CaO19.10389	4|3	7	3.5	2	0|0|0|0|7|0	0	0	-7.41	1	0.4	4|3	7	3.5	641
MFG1_untreat	XP_719423.1	CAALFM_CR10750CA	3|3	6	3	2	3|0|3|0|3|0	0	0	-6.39	1	0.4	3|3	6	3	134
MFG1_untreat	XP_716852.1	XDJ1	3|3	6	3	2	2|0|3|0|0|3	0	0	-6.39	1	0.4	3|3	6	3	439
MFG1_untreat	XP_722521.1	COX4	0|2	2	1	2	0|0|0|0|5|0	0	0	-9.5	0.4	0.4	0|2	2	1	157
MFG1_untreat	XP_713308.1	ARC1	0|2	2	1	2	0|0|0|0|5|0	0	0	-9.5	0.4	0.4	0|2	2	1	369
MFG1_untreat	XP_713042.1	SVL3	0|2	2	1	2	0|0|0|5|0|0	0	0	-9.5	0.4	0.4	0|2	2	1	976
MFG1_untreat	XP_714733.1	NAT1	0|2	2	1	2	0|0|0|5|0|0	0	0	-9.5	0.4	0.4	0|2	2	1	782
MFG1_untreat	XP_719372.1	TRX1	8|6	14	7	2	3|5|3|3|5|3	0	0	-9.09	1.4	0.41	8|6	14	7	103
MFG1_untreat	XP_721379.1	RPL5	7|4	11	5.5	2	4|2|3|5|3|2	0	0	-10.24	1.22	0.41	7|4	11	5.5	298
MFG1_untreat	XP_720745.1	YNK1	4|5	9	4.5	2	0|0|0|0|8|0	0	0	-7.53	1.12	0.41	4|5	9	4.5	151
MFG1_untreat	XP_714003.1	CDC48	0|6	6	3	2	0|0|0|0|9|0	0	0	-17.85	0.67	0.41	0|6	6	3	826
MFG1_untreat	XP_717614.1	PFY1	0|2	2	1	2	0|2|0|0|3|0	0	0	-10.07	0.4	0.41	0|2	2	1	126
MFG1_untreat	XP_723568.1	MIR1	18|19	37	18.5	2	8|11|6|7|6|7	0	0	-8.03	1.95	0.42	18|19	37	18.5	307
MFG1_untreat	XP_721434.1	RPL10	17|17	34	17	2	6|7|6|11|6|5	0	0	-7.68	1.89	0.42	17|17	34	17	220
MFG1_untreat	XP_723101.1	CAALFM_C304380CA	13|18	31	15.5	2	9|7|9|8|9|8	0	0	-13.14	1.72	0.42	13|18	31	15.5	126
MFG1_untreat	XP_714681.1	YST1	3|4	7	3.5	2	2|0|2|4|3|0	0	0	-8.17	1	0.42	3|4	7	3.5	217
MFG1_untreat	XP_721735.1	CAALFM_C301890CA	2|3	5	2.5	2	3|3|2|3|0|2	0	0	-7.83	0.83	0.42	2|3	5	2.5	345
MFG1_untreat	XP_713625.1	SLB1	3|0	3	1.5	2	2|0|0|3|3|0	0	0	-12.15	0.5	0.42	3|0	3	1.5	308
MFG1_untreat	XP_720417.1	CAALFM_C403290WA	0|2	2	1	2	0|0|0|6|0|0	0	0	-11.36	0.33	0.42	0|2	2	1	899
MFG1_untreat	XP_716822.1	ERG11	0|2	2	1	2	0|0|0|6|0|0	0	0	-11.36	0.33	0.42	0|2	2	1	528
MFG1_untreat	XP_721492.1	RPL13	19|15	34	17	2	7|6|3|8|12|7	0	0	-13.81	1.7	0.43	19|15	34	17	202
MFG1_untreat	XP_714823.1	RPL11	14|18	32	16	2	6|5|6|11|8|3	0	0	-13.48	1.68	0.43	14|18	32	16	166
MFG1_untreat	XP_713700.1	HTA2	19|12	31	15.5	2	6|7|3|9|11|6	0	0	-18.03	1.55	0.43	19|12	31	15.5	131
MFG1_untreat	XP_721466.1	TIF34	14|12	26	13	2	3|6|3|10|6|2	0	0	-11.08	1.62	0.43	14|12	26	13	350
MFG1_untreat	XP_711416.1	RPS25B	14|7	21	10.5	2	5|6|7|4|9|7	0	0	-18.21	1.31	0.43	14|7	21	10.5	105
MFG1_untreat	XP_723578.1	RPA34	6|9	15	7.5	2	4|3|4|3|6|6	0	0	-12.62	1.25	0.43	6|9	15	7.5	240
MFG1_untreat	XP_719211.1	NAB3	5|5	10	5	2	4|2|5|3|0|2	0	0	-8.78	1.11	0.43	5|5	10	5	836
MFG1_untreat	XP_717154.1	TIF11	2|0	2	1	2	3|0|3|0|3|0	0	0	-12.15	0.33	0.43	2|0	2	1	154
MFG1_untreat	XP_713052.1	GAD1	0|2	2	1	2	0|0|0|4|2|0	0	0	-12.15	0.33	0.43	0|2	2	1	568
MFG1_untreat	XP_723118.1	RPL19A	12|11	23	11.5	2	4|5|3|8|6|7	0	0	-10.74	1.53	0.44	12|11	23	11.5	115
MFG1_untreat	XP_712185.1	HMO1	8|10	18	9	2	4|6|6|4|4|7	0	0	-11.49	1.38	0.44	8|10	18	9	223
MFG1_untreat	XP_720154.1	HTZ1	10|7	17	8.5	2	5|6|2|7|0|4	0	0	-12.93	1.31	0.44	10|7	17	8.5	133
MFG1_untreat	XP_712532.1	SAR1	3|8	11	5.5	2	3|5|3|7|2|2	0	0	-17.5	0.92	0.44	3|8	11	5.5	152
MFG1_untreat	XP_717620.1	DRG1	0|7	7	3.5	2	0|0|4|7|0|0	0	0	-23.15	0.64	0.44	0|7	7	3.5	368
MFG1_untreat	Q9U6Y5	Q9U6Y5	0|3	3	1.5	2	0|0|0|0|8|0	0	0	-15.58	0.38	0.44	0|3	3	1.5	249
MFG1_untreat	XP_717958.1	TMA19	0|3	3	1.5	2	0|2|0|0|6|0	0	0	-16.28	0.38	0.44	0|3	3	1.5	167
MFG1_untreat	XP_717293.1	SSZ1	2|0	2	1	2	0|0|0|3|4|0	0	0	-14.39	0.29	0.44	2|0	2	1	540
MFG1_untreat	XP_721533.1	CAALFM_C103360WA	0|2	2	1	2	0|2|0|5|0|0	0	0	-14.37	0.29	0.44	0|2	2	1	1410
MFG1_untreat	XP_718852.1	RPS22A	16|20	36	18	2	7|10|8|12|9|8	0	0	-15.87	1.64	0.45	16|20	36	18	130
MFG1_untreat	XP_720065.1	RPL9	9|17	26	13	2	6|7|7|11|5|9	0	0	-22.35	1.3	0.45	9|17	26	13	191
MFG1_untreat	XP_714963.1	SUP45	7|12	19	9.5	2	3|3|2|13|0|2	0	0	-17.39	1.19	0.45	7|12	19	9.5	436
MFG1_untreat	XP_712725.1	HTA1	19|0	19	9.5	2	6|0|4|10|11|6	0	0	-45.32	0.9	0.45	19|0	19	9.5	132
MFG1_untreat	XP_713982.1	CaO19.9855	6|7	13	6.5	2	4|6|3|6|0|6	0	0	-12.62	1.08	0.45	6|7	13	6.5	672
MFG1_untreat	XP_713608.1	CBC2	4|9	13	6.5	2	6|6|6|7|0|4	0	0	-17.6	1	0.45	4|9	13	6.5	224
MFG1_untreat	XP_717098.1	PDB1	6|5	11	5.5	2	2|3|0|2|8|0	0	0	-12.04	1	0.45	6|5	11	5.5	379
MFG1_untreat	XP_717280.1	RTN1	4|0	4	2	2	0|0|0|2|7|0	0	0	-18.4	0.44	0.45	4|0	4	2	366
MFG1_untreat	XP_719387.1	EIF4E	0|4	4	2	2	2|2|0|4|5|3	0	0	-18.75	0.44	0.45	0|4	4	2	209
MFG1_untreat	XP_717791.1	ATP5	2|0	2	1	2	0|0|0|0|8|0	0	0	-15.58	0.25	0.45	2|0	2	1	205
MFG1_untreat	XP_712535.1	RPL1	29|25	54	27	2	8|8|7|14|16|9	0	0	-17.22	1.8	0.46	29|25	54	27	217
MFG1_untreat	XP_723193.1	RPL18	27|21	48	24	2	8|11|9|17|4|9	0	0	-19.31	1.71	0.46	27|21	48	24	154
MFG1_untreat	XP_712242.1	ATP1	16|24	40	20	2	11|11|5|11|15|11	0	0	-22.82	1.54	0.46	16|24	40	20	447
MFG1_untreat	XP_722853.1	NIP1	15|23	38	19	2	2|5|7|17|0|5	0	0	-20.25	1.58	0.46	15|23	38	19	874
MFG1_untreat	XP_716024.1	KRE30	3|15	18	9	2	2|8|4|11|0|6	0	0	-31.68	0.95	0.46	3|15	18	9	609
MFG1_untreat	XP_715210.1	SUI3	5|10	15	7.5	2	5|3|4|10|0|2	0	0	-19.48	1	0.46	5|10	15	7.5	281
MFG1_untreat	XP_723139.1	RPS15	5|7	12	6	2	3|5|3|5|5|7	0	0	-14.06	1	0.46	5|7	12	6	115
MFG1_untreat	XP_723199.1	CAALFM_C305150WA	5|5	10	5	2	4|4|5|6|4|4	0	0	-12.31	0.91	0.46	5|5	10	5	475
MFG1_untreat	XP_720662.1	GCD11	3|7	10	5	2	3|5|5|7|3|2	0	0	-17.5	0.83	0.46	3|7	10	5	534
MFG1_untreat	XP_721980.1	SAH1	4|5	9	4.5	2	0|3|0|2|8|0	0	0	-13.57	0.82	0.46	4|5	9	4.5	450
MFG1_untreat	XP_712932.1	LYS22	0|4	4	2	2	0|4|0|6|0|0	0	0	-20.91	0.4	0.46	0|4	4	2	417
MFG1_untreat	XP_722090.1	CaO19.11504	0|3	3	1.5	2	0|5|2|4|0|0	0	0	-18.75	0.33	0.46	0|3	3	1.5	303
MFG1_untreat	XP_713708.1	HHF1	23|27	50	25	2	10|12|7|10|18|10	0	0	-19.94	1.67	0.47	23|27	50	25	105
MFG1_untreat	XP_720312.1	RPS18	19|14	33	16.5	2	7|10|7|8|7|13	0	0	-20.43	1.43	0.47	19|14	33	16.5	135
MFG1_untreat	XP_721420.1	PRT1	14|16	30	15	2	3|6|8|12|8|4	0	0	-15.2	1.5	0.47	14|16	30	15	739
[truncated: 1,482 more rows]
